# Supplementary material for: Influence of Substituents in a Six-Membered Chelate Ring of HG-Type Complexes Containing an N→Ru Bond on Their Stability and Catalytic Activity
Source: MDPI journal article supplement (doi:10.3390/molecules28031188), 2023-01-25

# $^1\text{H}$ NMR spectrum of compound **1a**

|                        |              |                      |              |                      |                  |
|------------------------|--------------|----------------------|--------------|----------------------|------------------|
| Acquisition Time (sec) | 1.9818       | Comment              | single pulse | Date                 |                  |
| Date Stamp             |              |                      |              |                      |                  |
| File Name              |              |                      |              | Frequency (MHz)      | 600.17           |
| Nucleus                | $^1\text{H}$ | Number of Transients | 8            | Origin               | ECA 600          |
| Owner                  | delta        | Points Count         | 32768        | Pulse Sequence       | single_pulse.ex2 |
| Solvent                | CHLOROFORM-d |                      |              | Receiver Gain        | 22.00            |
| Temperature (degree C) | 21.600       |                      |              | Spectrum Offset (Hz) | 5388.4248        |
|                        |              |                      |              | Sweep Width (Hz)     | 16534.39         |

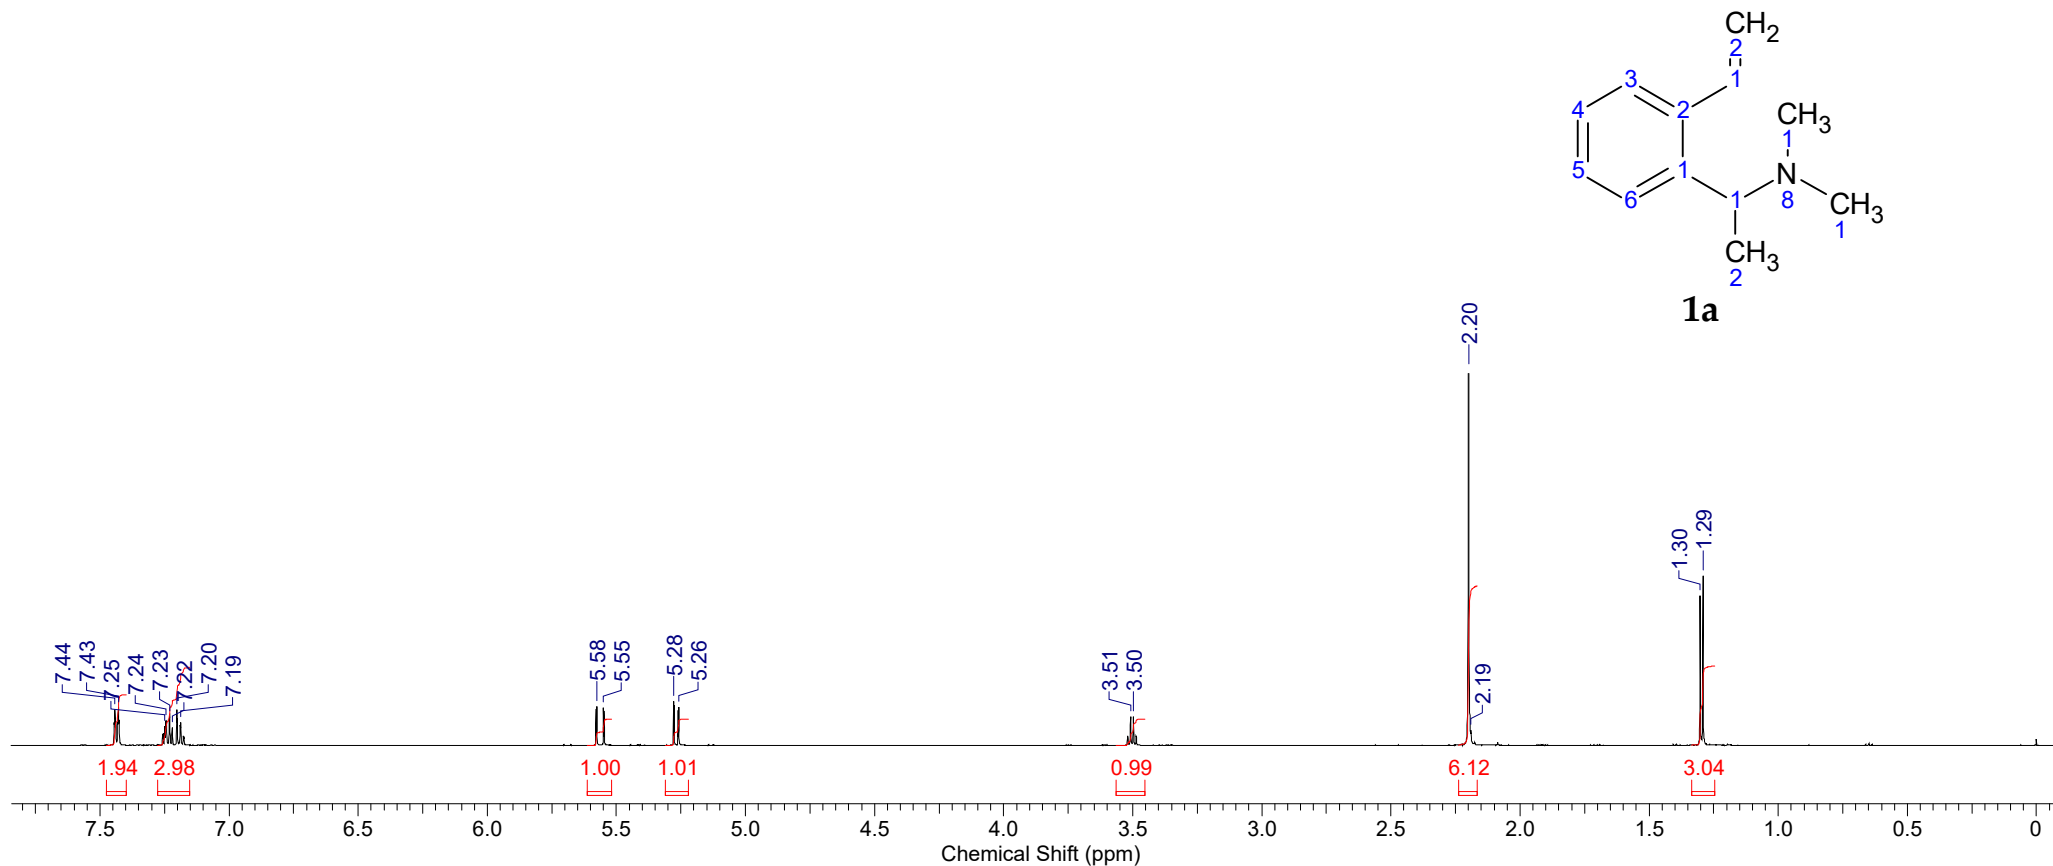

# <sup>1</sup>H NMR spectrum of compound **1a**

|                        |              |                      |              |                      |                  |
|------------------------|--------------|----------------------|--------------|----------------------|------------------|
| Acquisition Time (sec) | 1.9818       | Comment              | single pulse | Date                 |                  |
| Date Stamp             |              |                      |              |                      |                  |
| File Name              |              |                      |              | Frequency (MHz)      | 600.17           |
| Nucleus                | 1H           | Number of Transients | 8            | Origin               | ECA 600          |
| Owner                  | delta        | Points Count         | 32768        | Pulse Sequence       | single_pulse.ex2 |
| Solvent                | CHLOROFORM-d |                      |              | Receiver Gain        | 22.00            |
| Temperature (degree C) | 21.600       |                      |              | Spectrum Offset (Hz) | 5388.4248        |
|                        |              |                      |              | Sweep Width (Hz)     | 16534.39         |

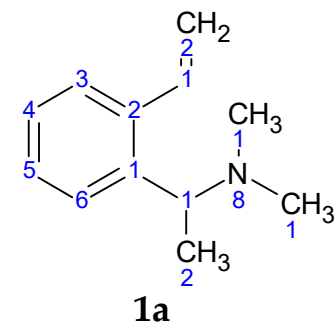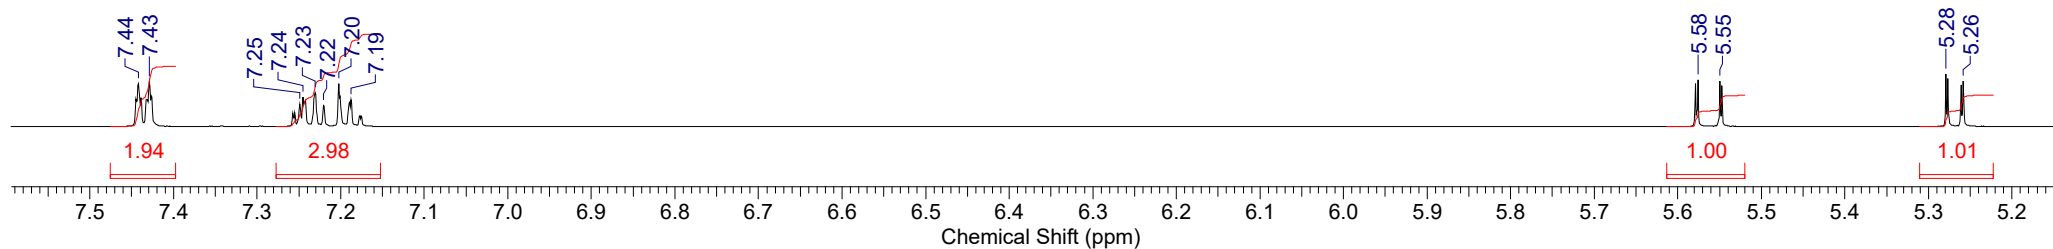

# $^1\text{H}$ NMR spectrum of compound **1a**

|                        |              |                      |              |                      |                  |
|------------------------|--------------|----------------------|--------------|----------------------|------------------|
| Acquisition Time (sec) | 1.9818       | Comment              | single pulse | Date                 |                  |
| Date Stamp             |              |                      |              |                      |                  |
| File Name              |              |                      |              | Frequency (MHz)      | 600.17           |
| Nucleus                | $^1\text{H}$ | Number of Transients | 8            | Origin               | ECA 600          |
| Owner                  | delta        | Points Count         | 32768        | Pulse Sequence       | single_pulse.ex2 |
| Solvent                | CHLOROFORM-d |                      |              | Receiver Gain        | 22.00            |
| Temperature (degree C) | 21.600       |                      |              | Spectrum Offset (Hz) | 5388.4248        |
|                        |              |                      |              | Sweep Width (Hz)     | 16534.39         |

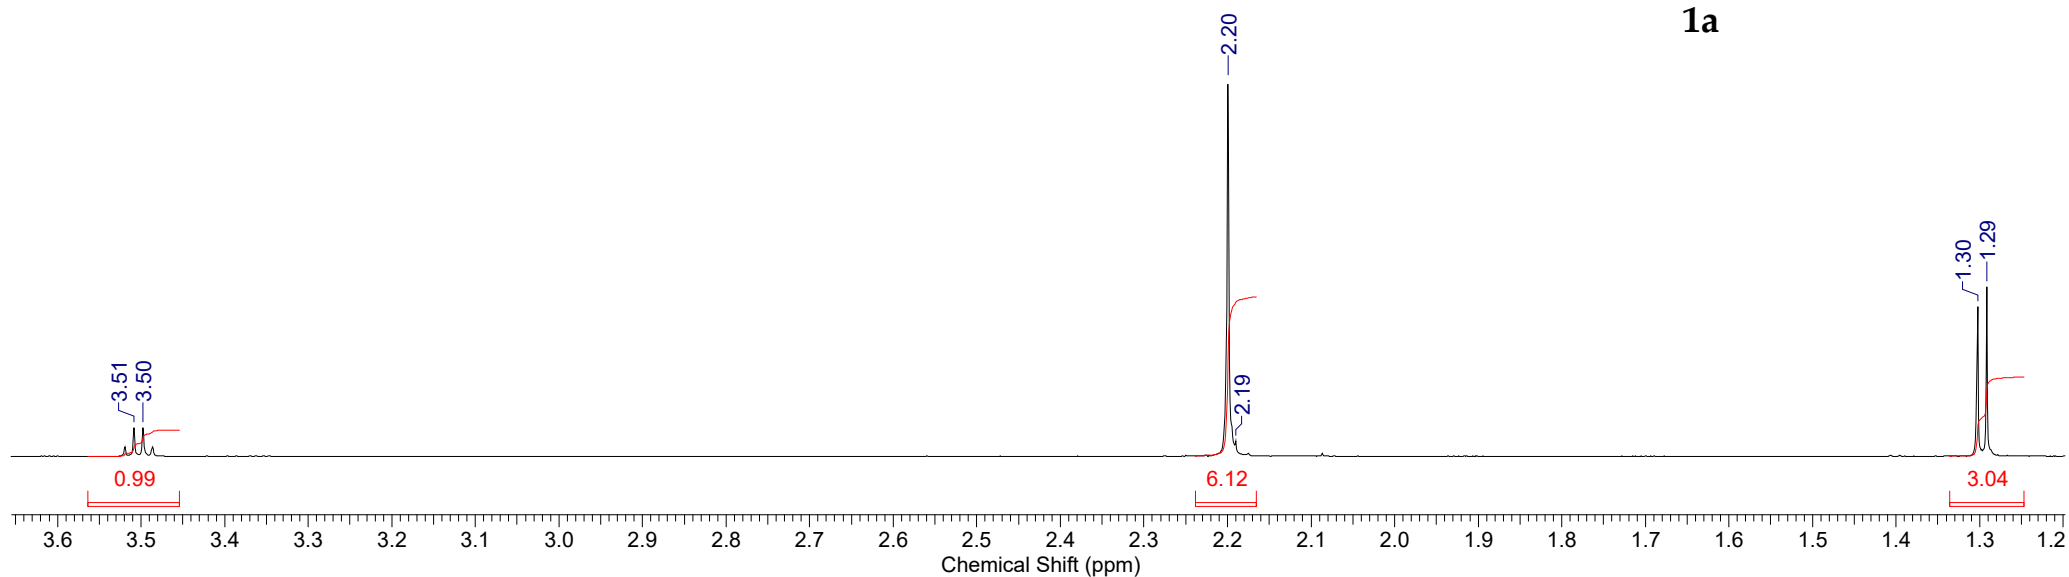

# $^{13}\text{C}$ NMR spectrum of compound **1a**

|                        |                 |                      |                                  |                  |                  |
|------------------------|-----------------|----------------------|----------------------------------|------------------|------------------|
| Acquisition Time (sec) | 0.6921          | Comment              | single pulse decoupled gated NOE |                  | Date             |
| Date Stamp             |                 |                      |                                  |                  |                  |
| File Name              |                 |                      | Frequency (MHz)                  |                  |                  |
| Nucleus                | $^{13}\text{C}$ | Number of Transients | 81                               | Origin           | ECA 600          |
| Owner                  | delta           | Points Count         | 32768                            | Pulse Sequence   | single pulse dec |
| Solvent                | CHLOROFORM-d    | Spectrum Offset (Hz) | 15091.3428                       | Sweep Width (Hz) | 47348.49         |
|                        |                 |                      | Receiver Gain                    |                  |                  |
|                        |                 |                      | Temperature (degree C)           |                  |                  |

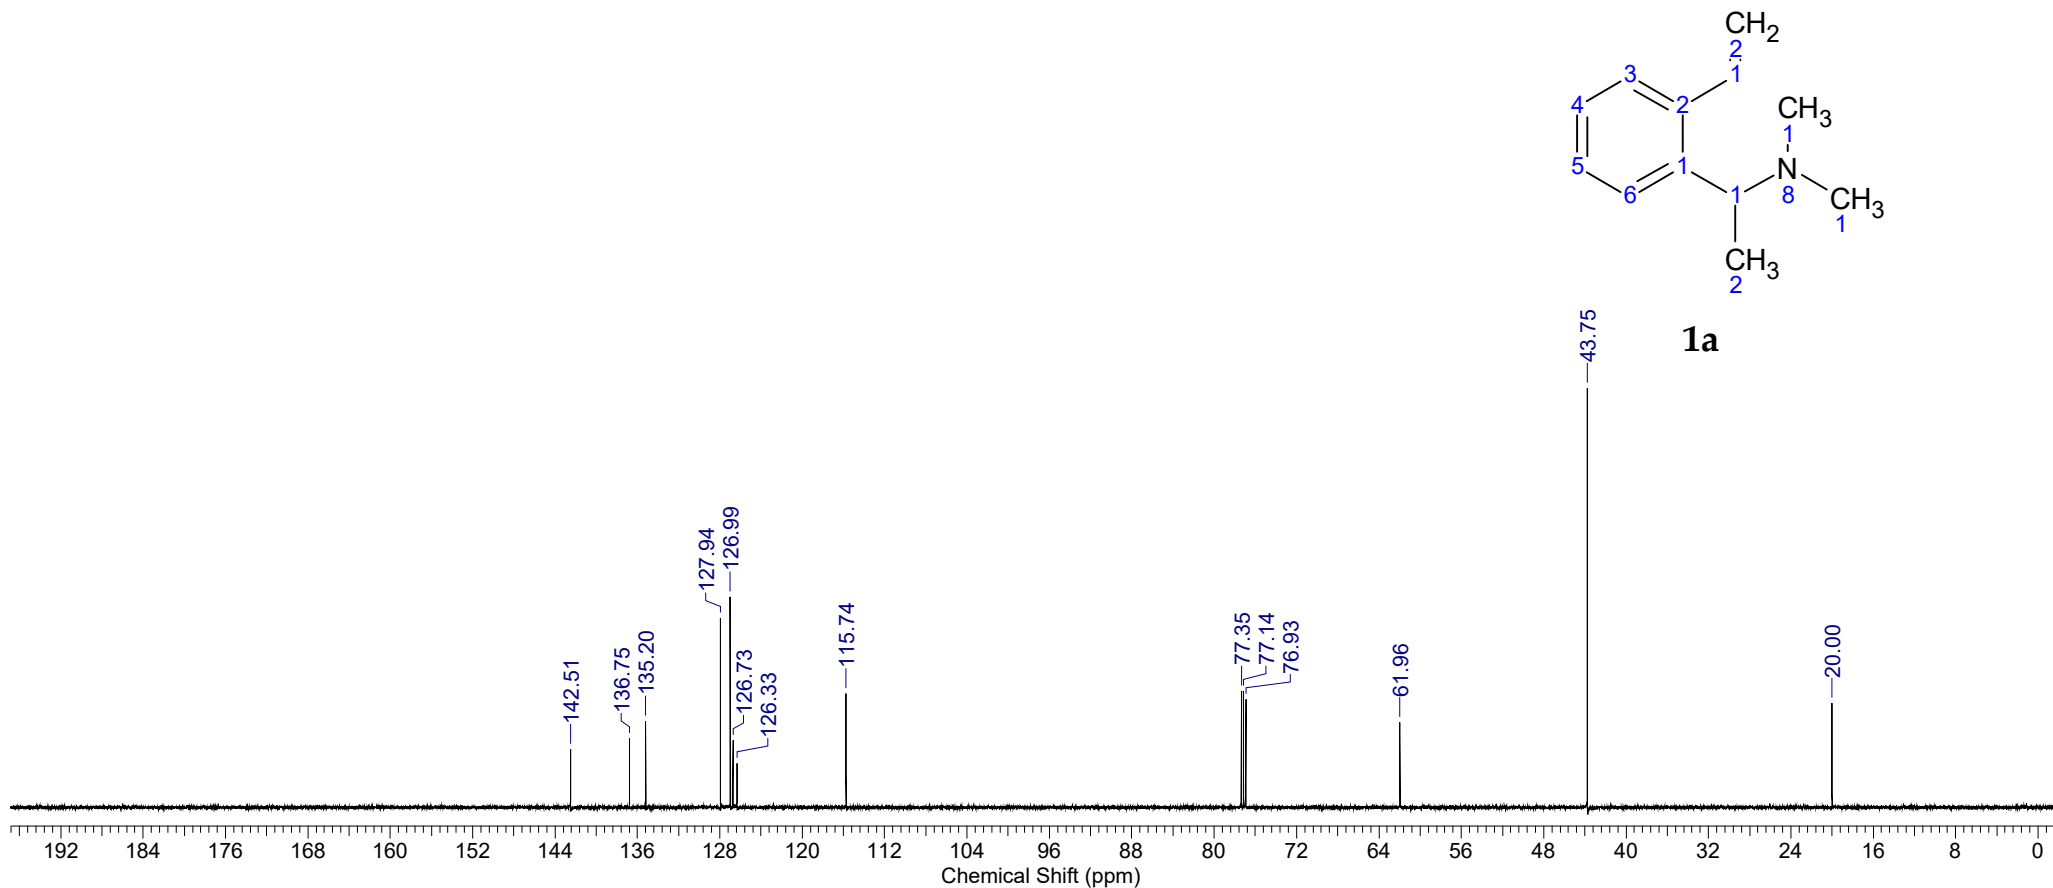

# $^{13}\text{C}$ NMR spectrum of compound **1a**

|                        |              |                      |                                  |                  |                  |                        |        |
|------------------------|--------------|----------------------|----------------------------------|------------------|------------------|------------------------|--------|
| Acquisition Time (sec) | 0.6921       | Comment              | single pulse decoupled gated NOE |                  |                  | Date                   |        |
| Date Stamp             |              |                      |                                  |                  |                  |                        |        |
| File Name              |              |                      |                                  |                  | Frequency (MHz)  | 150.91                 |        |
| Nucleus                | 13C          | Number of Transients | 81                               | Origin           | ECA 600          | Original Points Count  | 32768  |
| Owner                  | delta        | Points Count         | 32768                            | Pulse Sequence   | single pulse dec | Receiver Gain          | 52.00  |
| Solvent                | CHLOROFORM-d | Spectrum Offset (Hz) | 15091.3428                       | Sweep Width (Hz) | 47348.49         | Temperature (degree C) | 22.900 |

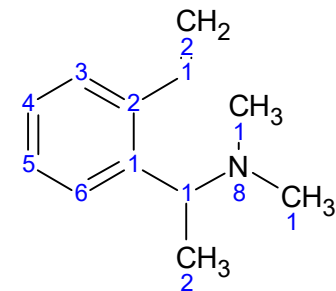

**1a**

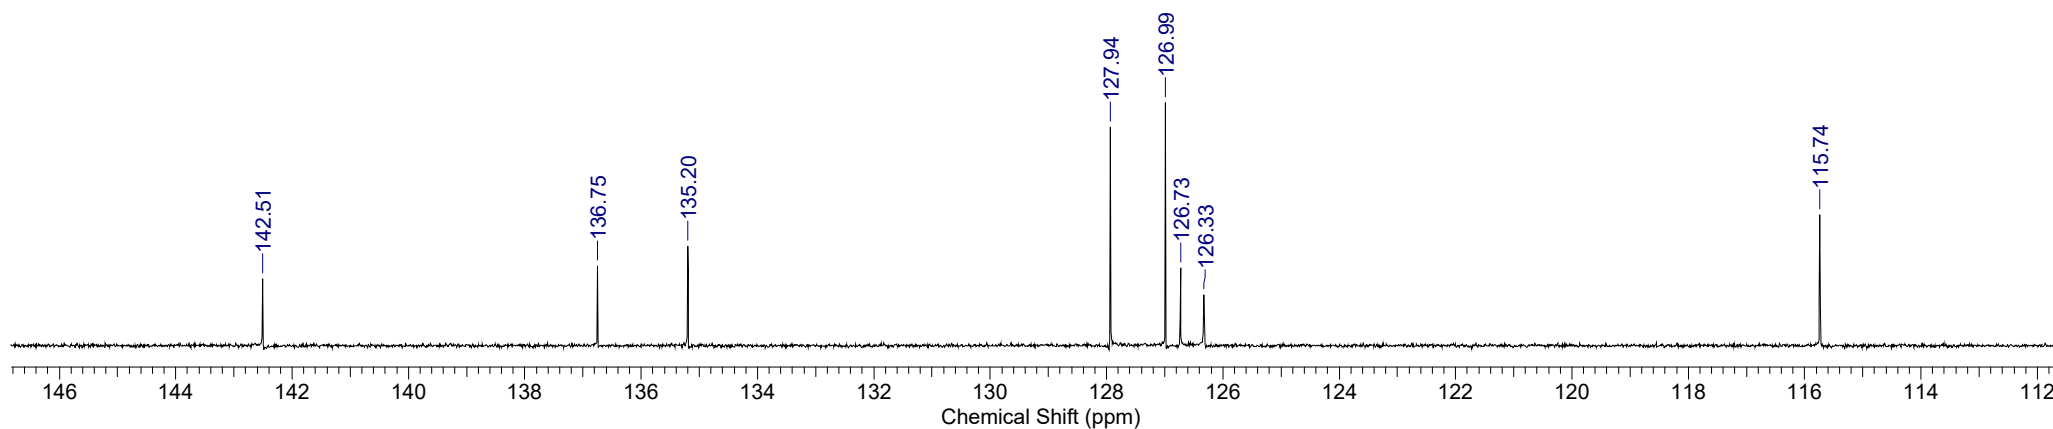

$^{13}\text{C}$  NMR spectrum of compound **1a**

|                        |  |              |  |                      |  |                                  |  |                        |  |                  |  |
|------------------------|--|--------------|--|----------------------|--|----------------------------------|--|------------------------|--|------------------|--|
| Acquisition Time (sec) |  | 0.6921       |  | Comment              |  | single pulse decoupled gated NOE |  | Date                   |  |                  |  |
| Date Stamp             |  |              |  |                      |  |                                  |  |                        |  |                  |  |
| File Name              |  |              |  |                      |  |                                  |  | Frequency (MHz)        |  | 150.91           |  |
| Nucleus                |  | 13C          |  | Number of Transients |  | 81                               |  | Origin                 |  | ECA 600          |  |
| Owner                  |  | delta        |  | Points Count         |  | 32768                            |  | Pulse Sequence         |  | single pulse dec |  |
| Solvent                |  | CHLOROFORM-d |  | Spectrum Offset (Hz) |  | 15091.3428                       |  | Sweep Width (Hz)       |  | 47348.49         |  |
|                        |  |              |  |                      |  |                                  |  | Temperature (degree C) |  | 22.900           |  |

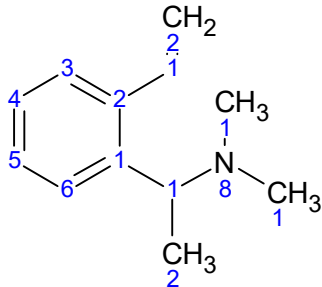

1a

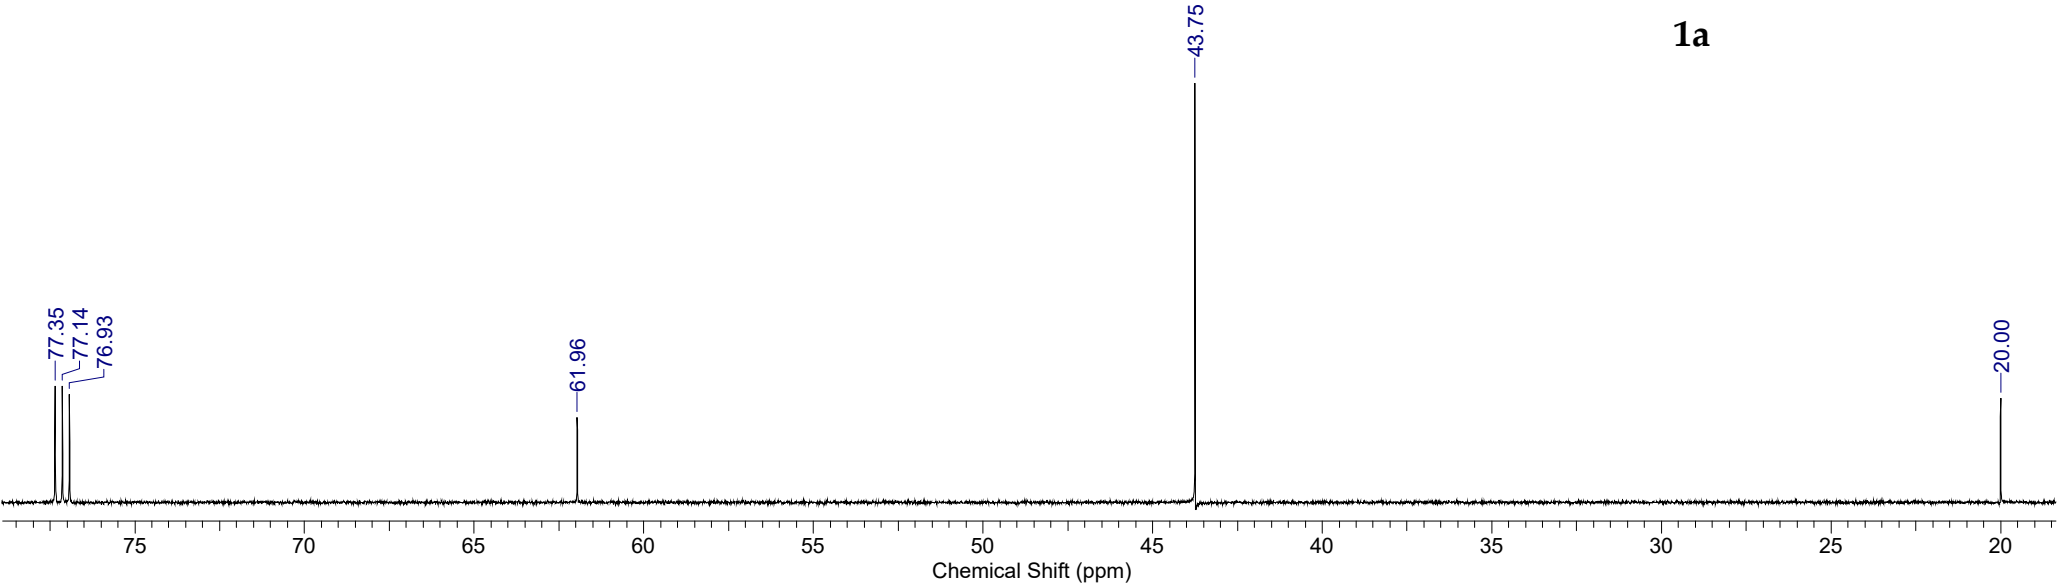

IR spectrum of compound **1a**

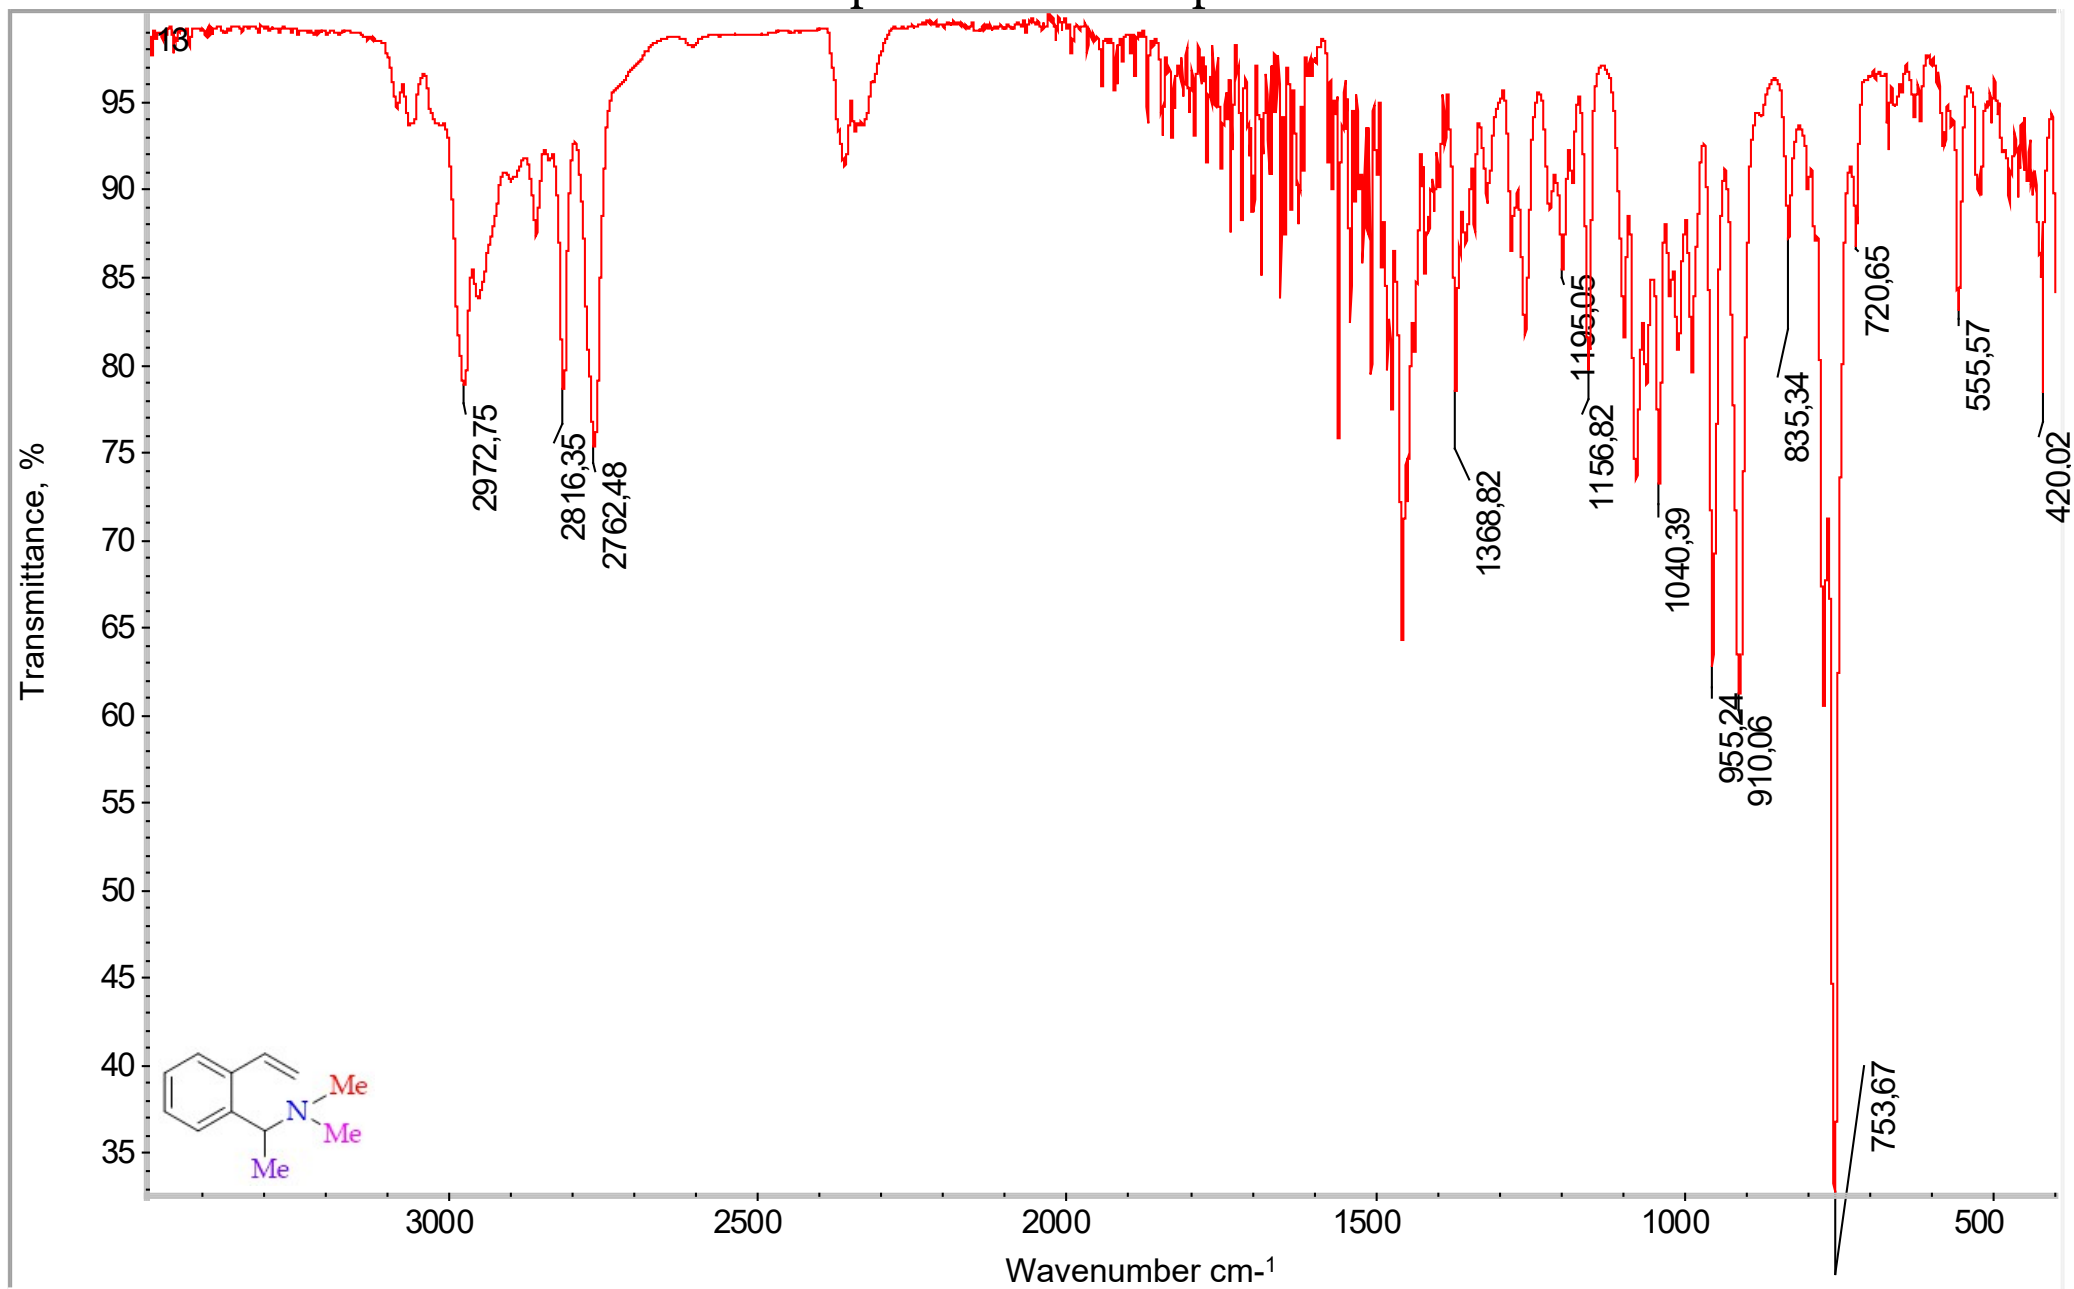

# HRMS (MALDI-TOF) spectrum of compound **1a**

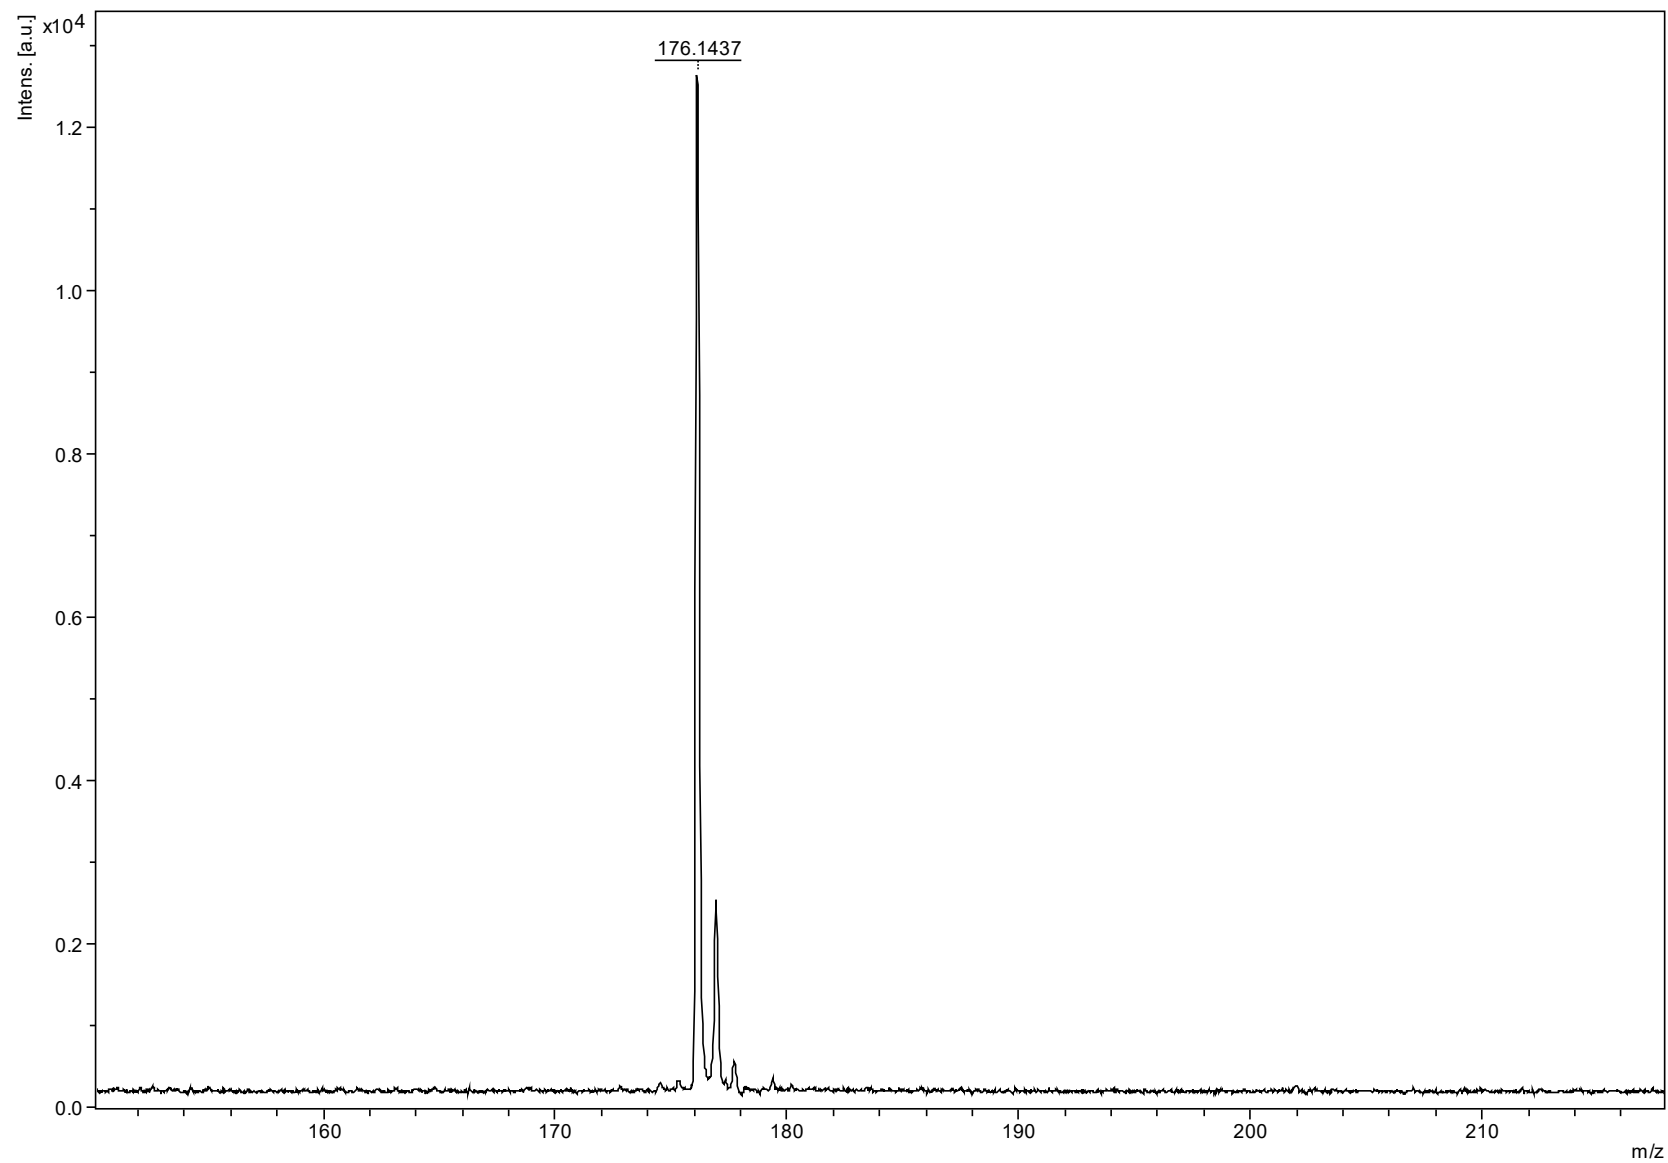



# $^1\text{H}$ NMR spectrum of compound **1b**

|                        |              |                      |              |                       |                  |
|------------------------|--------------|----------------------|--------------|-----------------------|------------------|
| Acquisition Time (sec) | 1.9818       | Comment              | single pulse | Date                  |                  |
| Date Stamp             |              |                      |              |                       |                  |
| File Name              |              |                      |              | Frequency (MHz)       | 600.17           |
| Nucleus                | $^1\text{H}$ | Number of Transients | 8            | Origin                | ECA 600          |
|                        |              |                      |              | Original Points Count | 32768            |
| Owner                  | delta        | Points Count         | 32768        | Pulse Sequence        | single_pulse.ex2 |
|                        |              |                      |              | Receiver Gain         | 30.00            |
| Solvent                | CHLOROFORM-d |                      |              | Spectrum Offset (Hz)  | 5398.5166        |
|                        |              |                      |              | Sweep Width (Hz)      | 16534.39         |
| Temperature (degree C) | 25.000       |                      |              |                       |                  |

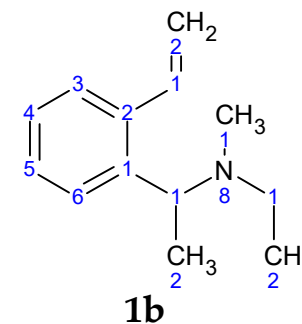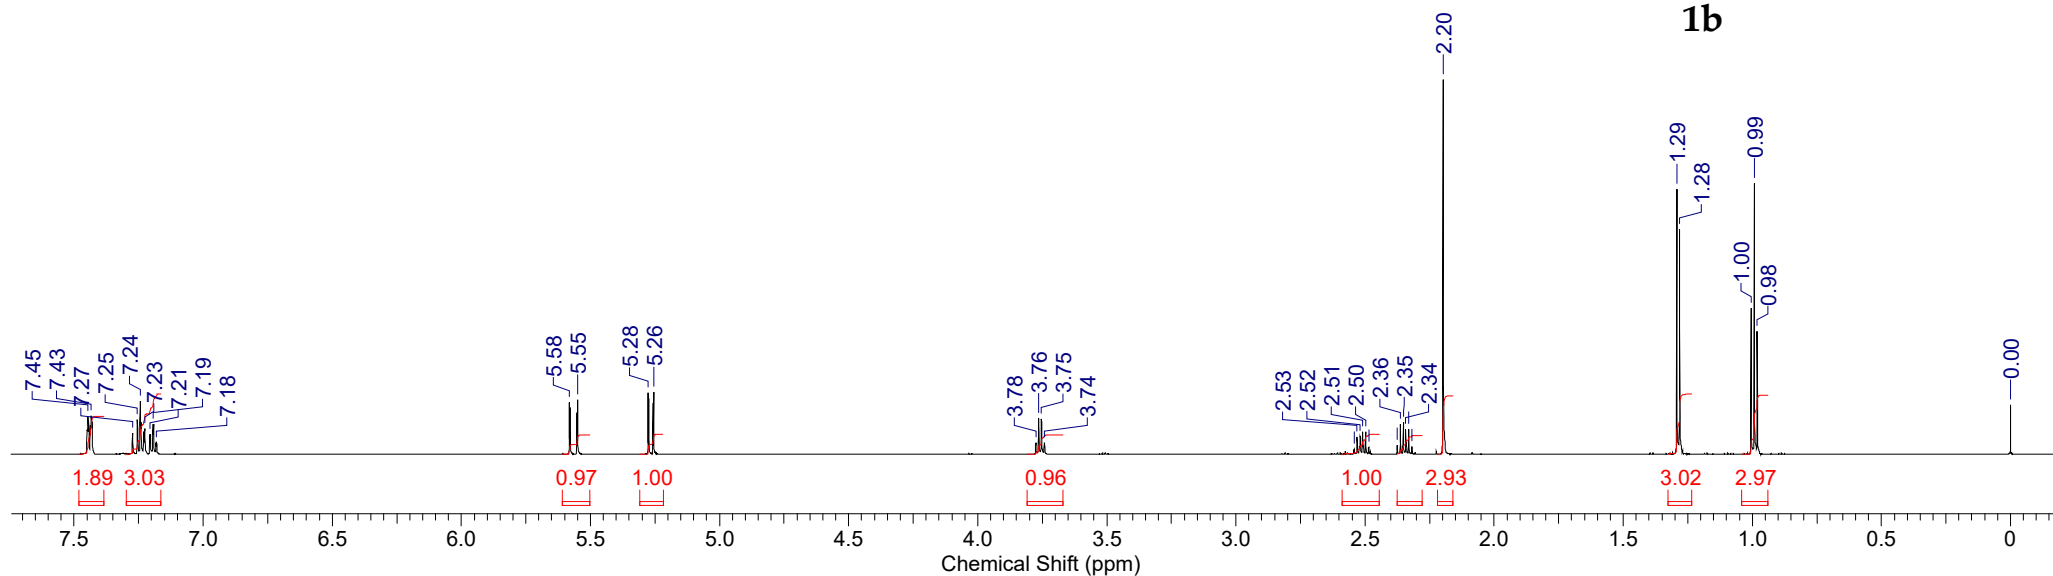

# <sup>1</sup>H NMR spectrum of compound **1b**

|                        |              |                      |              |                      |                  |
|------------------------|--------------|----------------------|--------------|----------------------|------------------|
| Acquisition Time (sec) | 1.9818       | Comment              | single pulse | Date                 |                  |
| Date Stamp             |              |                      |              |                      |                  |
| File Name              |              |                      |              | Frequency (MHz)      | 600.17           |
| Nucleus                | 1H           | Number of Transients | 8            | Origin               | ECA 600          |
| Owner                  | delta        | Points Count         | 32768        | Pulse Sequence       | single_pulse.ex2 |
| Solvent                | CHLOROFORM-d |                      |              | Receiver Gain        | 30.00            |
|                        |              |                      |              | Spectrum Offset (Hz) | 5398.5166        |
|                        |              |                      |              | Sweep Width (Hz)     | 16534.39         |
| Temperature (degree C) | 25.000       |                      |              |                      |                  |

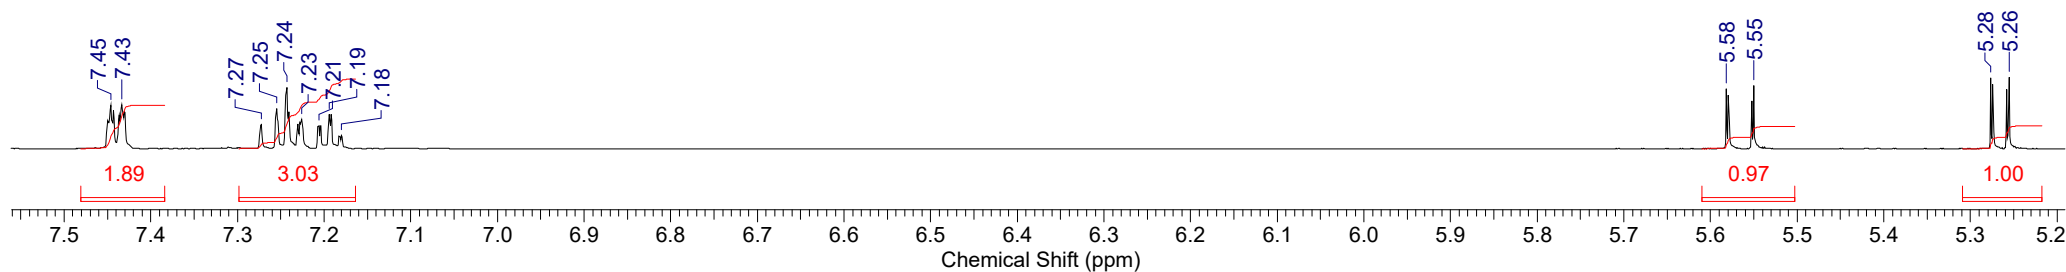

# $^1\text{H}$ NMR spectrum of compound **1b**

|                        |              |                      |              |                  |                  |
|------------------------|--------------|----------------------|--------------|------------------|------------------|
| Acquisition Time (sec) | 1.9818       | Comment              | single pulse | Date             |                  |
| Date Stamp             |              |                      |              |                  |                  |
| File Name              |              |                      |              | Frequency (MHz)  | 600.17           |
| Nucleus                | $^1\text{H}$ | Number of Transients | 8            | Origin           | ECA 600          |
| Owner                  | delta        | Points Count         | 32768        | Pulse Sequence   | single_pulse.ex2 |
| Solvent                | CHLOROFORM-d | Spectrum Offset (Hz) |              | Receiver Gain    | 30.00            |
| Temperature (degree C) |              | 5398.5166            |              | Sweep Width (Hz) | 16534.39         |

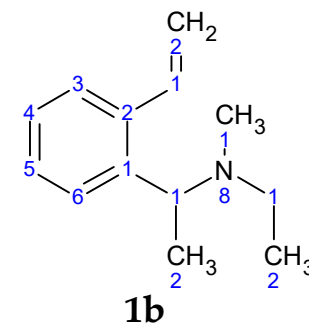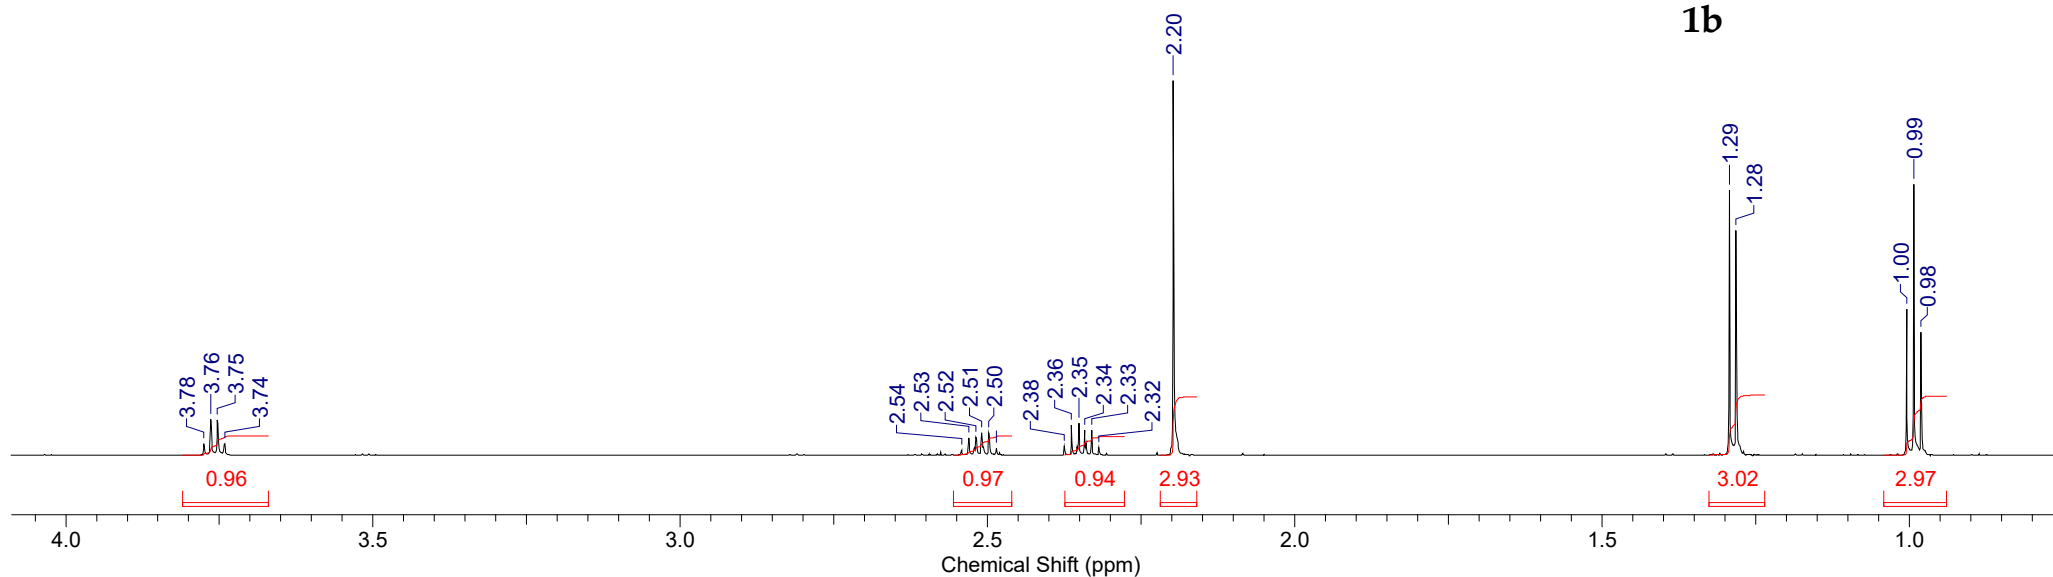

# $^{13}\text{C}$ NMR spectrum of compound **1b**

|                        |              |                      |                                  |                  |                  |                        |        |
|------------------------|--------------|----------------------|----------------------------------|------------------|------------------|------------------------|--------|
| Acquisition Time (sec) | 0.6921       | Comment              | single pulse decoupled gated NOE |                  |                  | Date                   |        |
| Date Stamp             |              |                      |                                  |                  |                  |                        |        |
| File Name              |              |                      |                                  |                  | Frequency (MHz)  | 150.91                 |        |
| Nucleus                | 13C          | Number of Transients | 301                              | Origin           | ECA 600          | Original Points Count  | 32768  |
| Owner                  | delta        | Points Count         | 32768                            | Pulse Sequence   | single_pulse_dec | Receiver Gain          | 56.00  |
| Solvent                | CHLOROFORM-d | Spectrum Offset (Hz) | 15091.3428                       | Sweep Width (Hz) | 47348.49         | Temperature (degree C) | 22.400 |

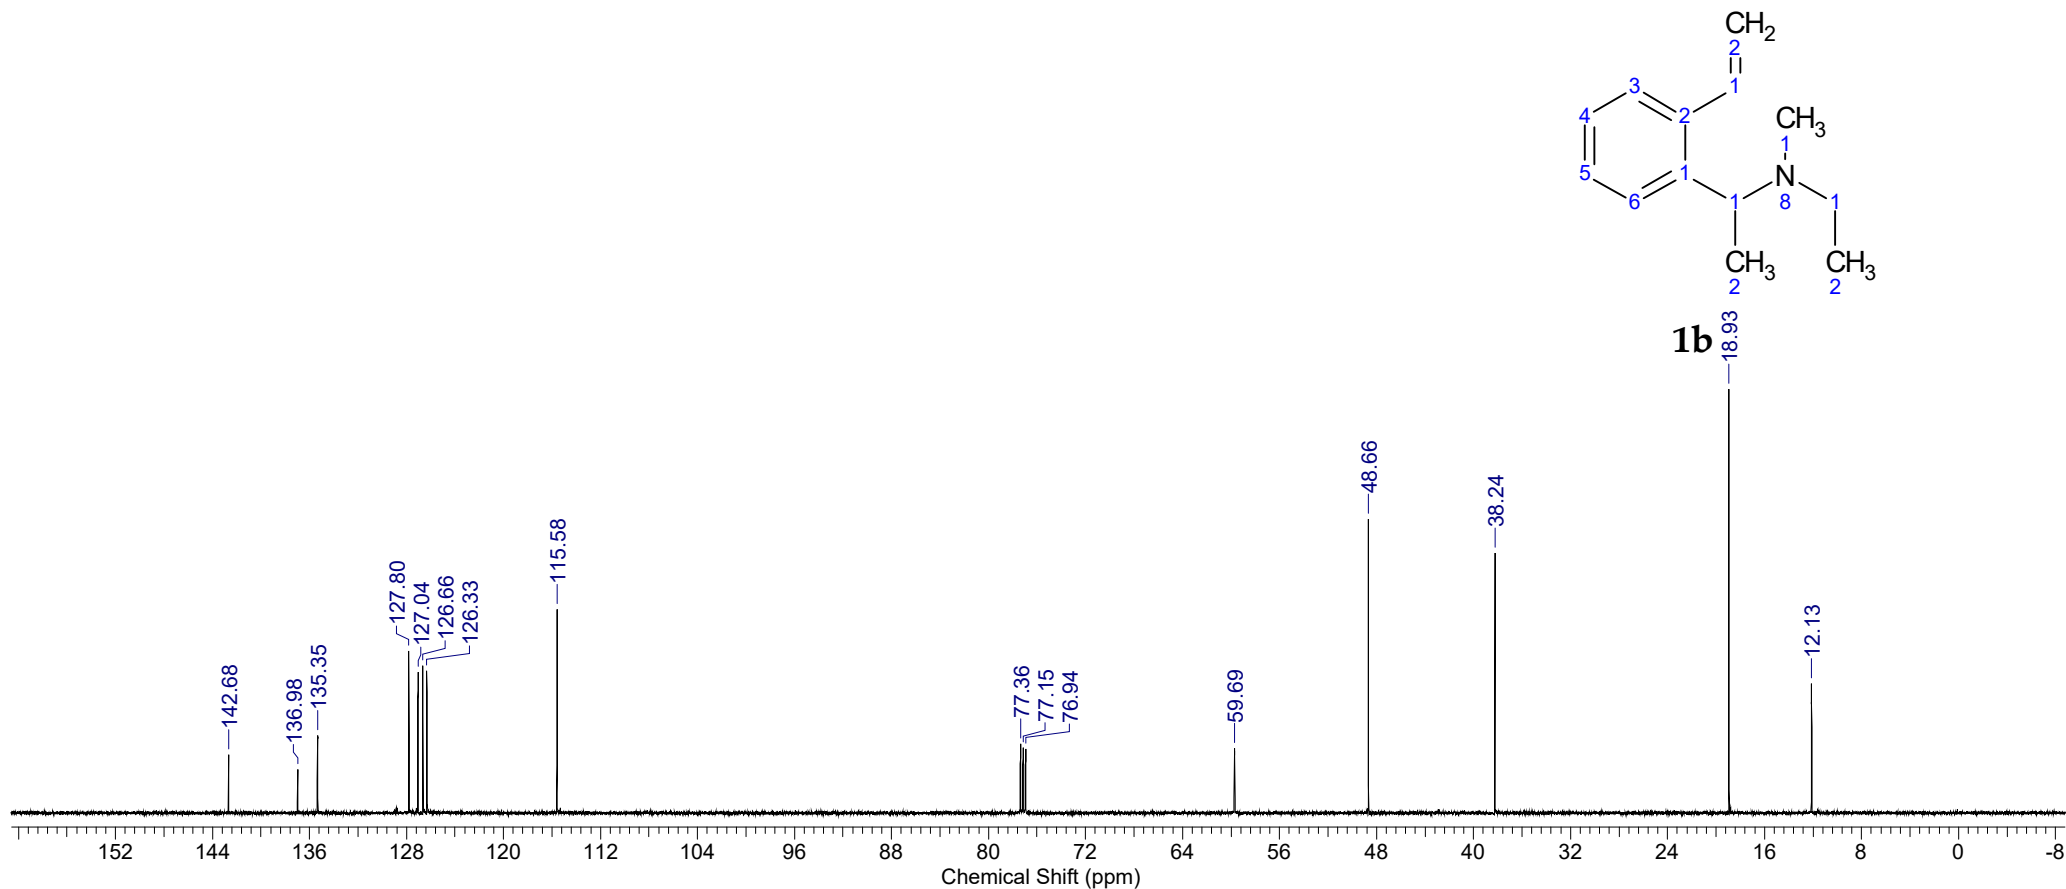

# $^{13}\text{C}$ NMR spectrum of compound **1b**

|                        |              |                      |                                  |                  |                  |                        |        |
|------------------------|--------------|----------------------|----------------------------------|------------------|------------------|------------------------|--------|
| Acquisition Time (sec) | 0.6921       | Comment              | single pulse decoupled gated NOE |                  |                  | Date                   |        |
| Date Stamp             |              |                      |                                  |                  |                  |                        |        |
| File Name              |              |                      |                                  |                  | Frequency (MHz)  | 150.91                 |        |
| Nucleus                | 13C          | Number of Transients | 301                              | Origin           | ECA 600          | Original Points Count  | 32768  |
| Owner                  | delta        | Points Count         | 32768                            | Pulse Sequence   | single_pulse_dec | Receiver Gain          | 56.00  |
| Solvent                | CHLOROFORM-d | Spectrum Offset (Hz) | 15091.3428                       | Sweep Width (Hz) | 47348.49         | Temperature (degree C) | 22.400 |

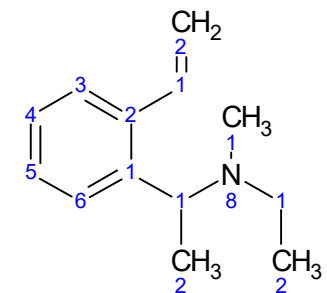

**1b**

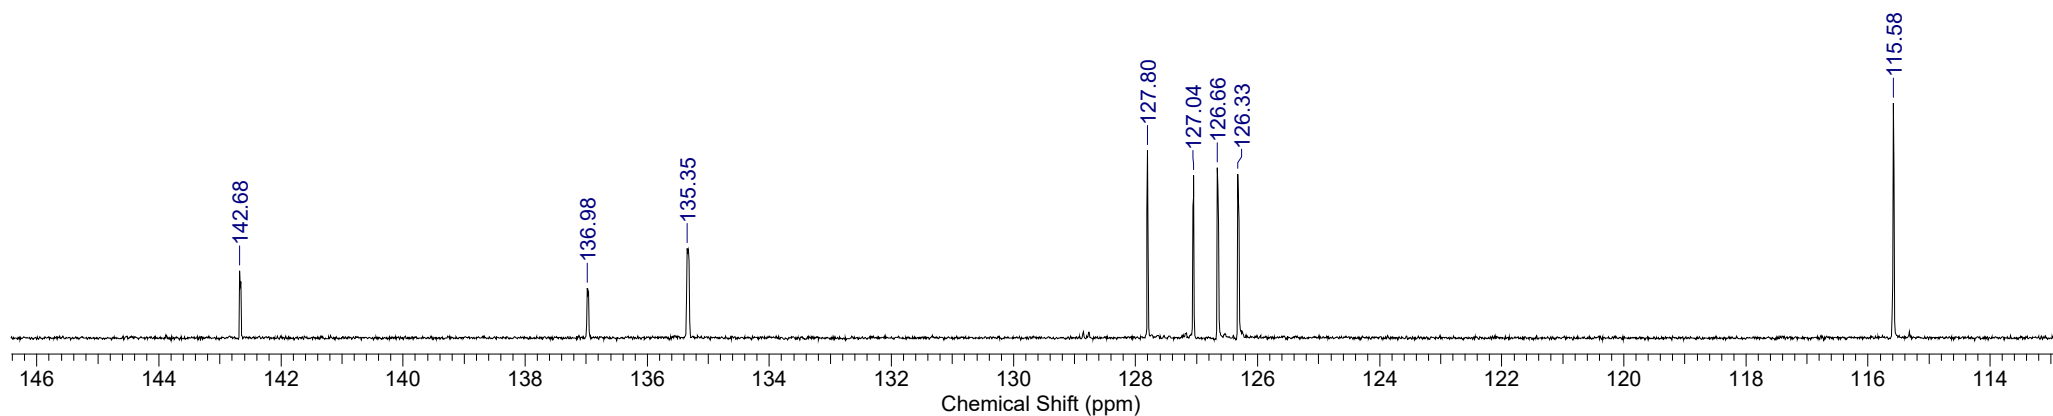

# $^{13}\text{C}$ NMR spectrum of compound **1b**

|                        |              |                      |                                  |                  |                  |                        |        |
|------------------------|--------------|----------------------|----------------------------------|------------------|------------------|------------------------|--------|
| Acquisition Time (sec) | 0.6921       | Comment              | single pulse decoupled gated NOE |                  |                  | Date                   |        |
| Date Stamp             |              |                      |                                  |                  |                  |                        |        |
| File Name              |              |                      |                                  |                  | Frequency (MHz)  | 150.91                 |        |
| Nucleus                | 13C          | Number of Transients | 301                              | Origin           | ECA 600          | Original Points Count  | 32768  |
| Owner                  | delta        | Points Count         | 32768                            | Pulse Sequence   | single_pulse_dec | Receiver Gain          | 56.00  |
| Solvent                | CHLOROFORM-d | Spectrum Offset (Hz) | 15091.3428                       | Sweep Width (Hz) | 47348.49         | Temperature (degree C) | 22.400 |

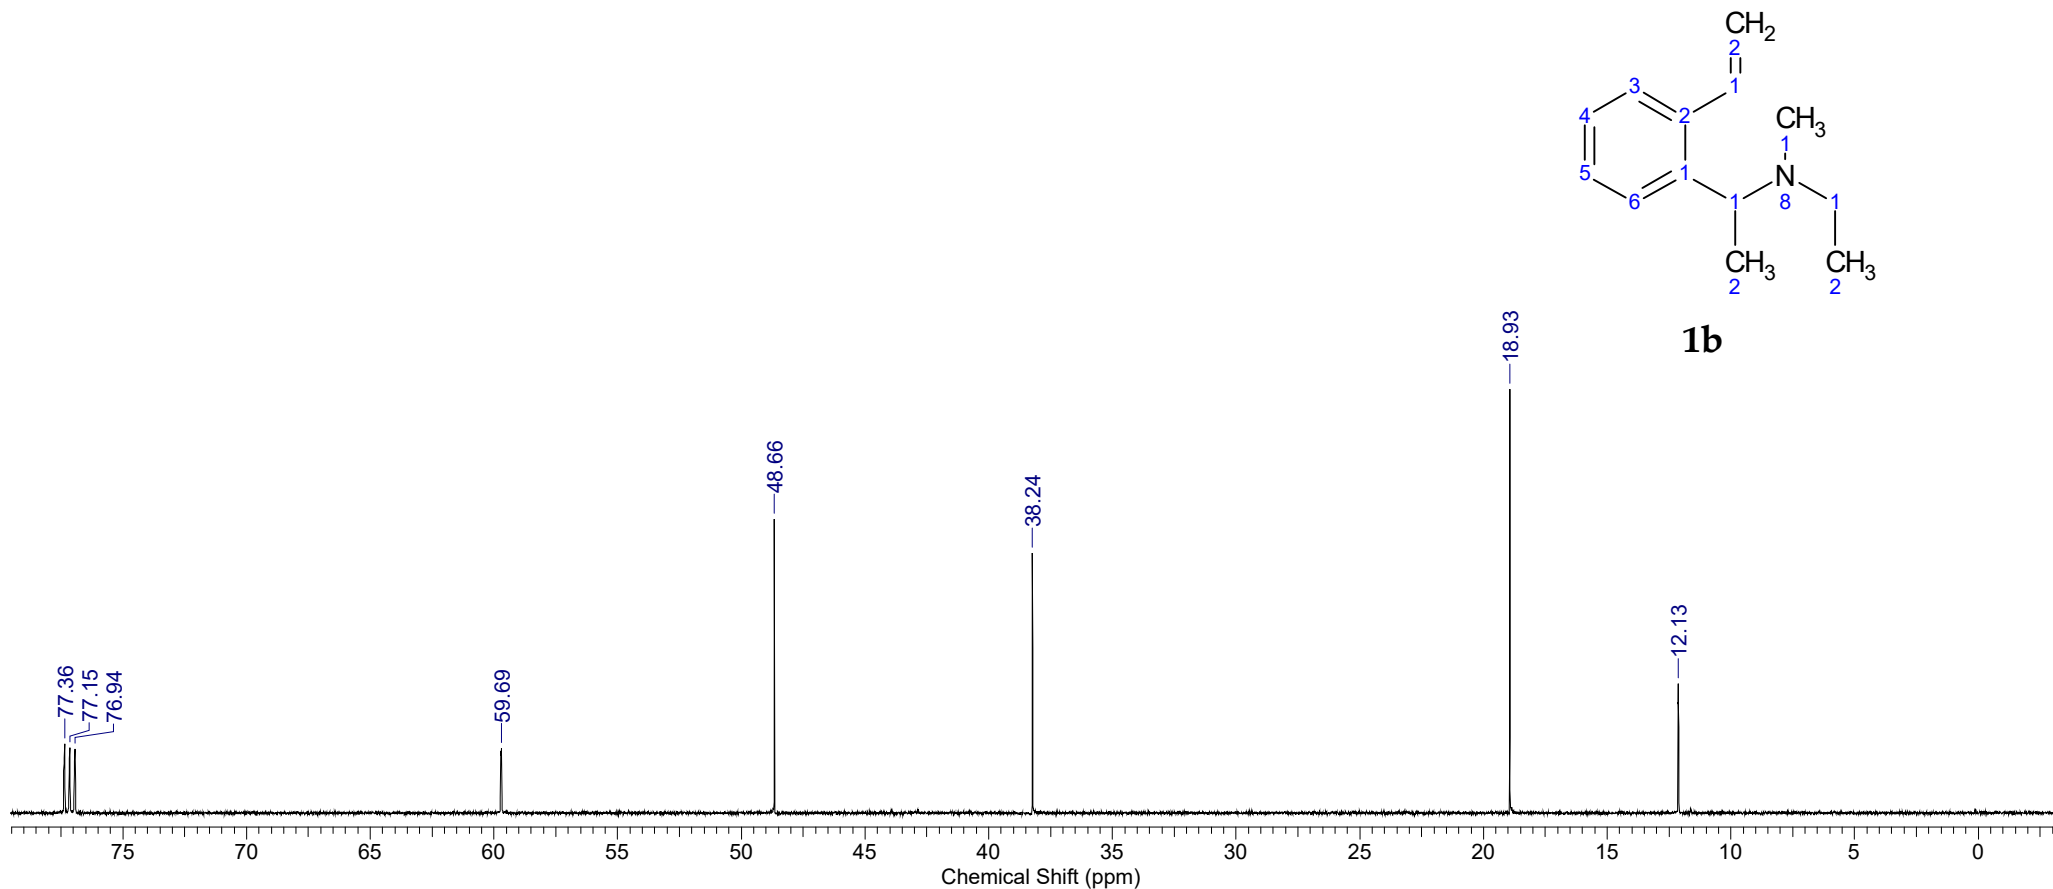

# HRMS (MALDI-TOF) spectrum of compound **1b**

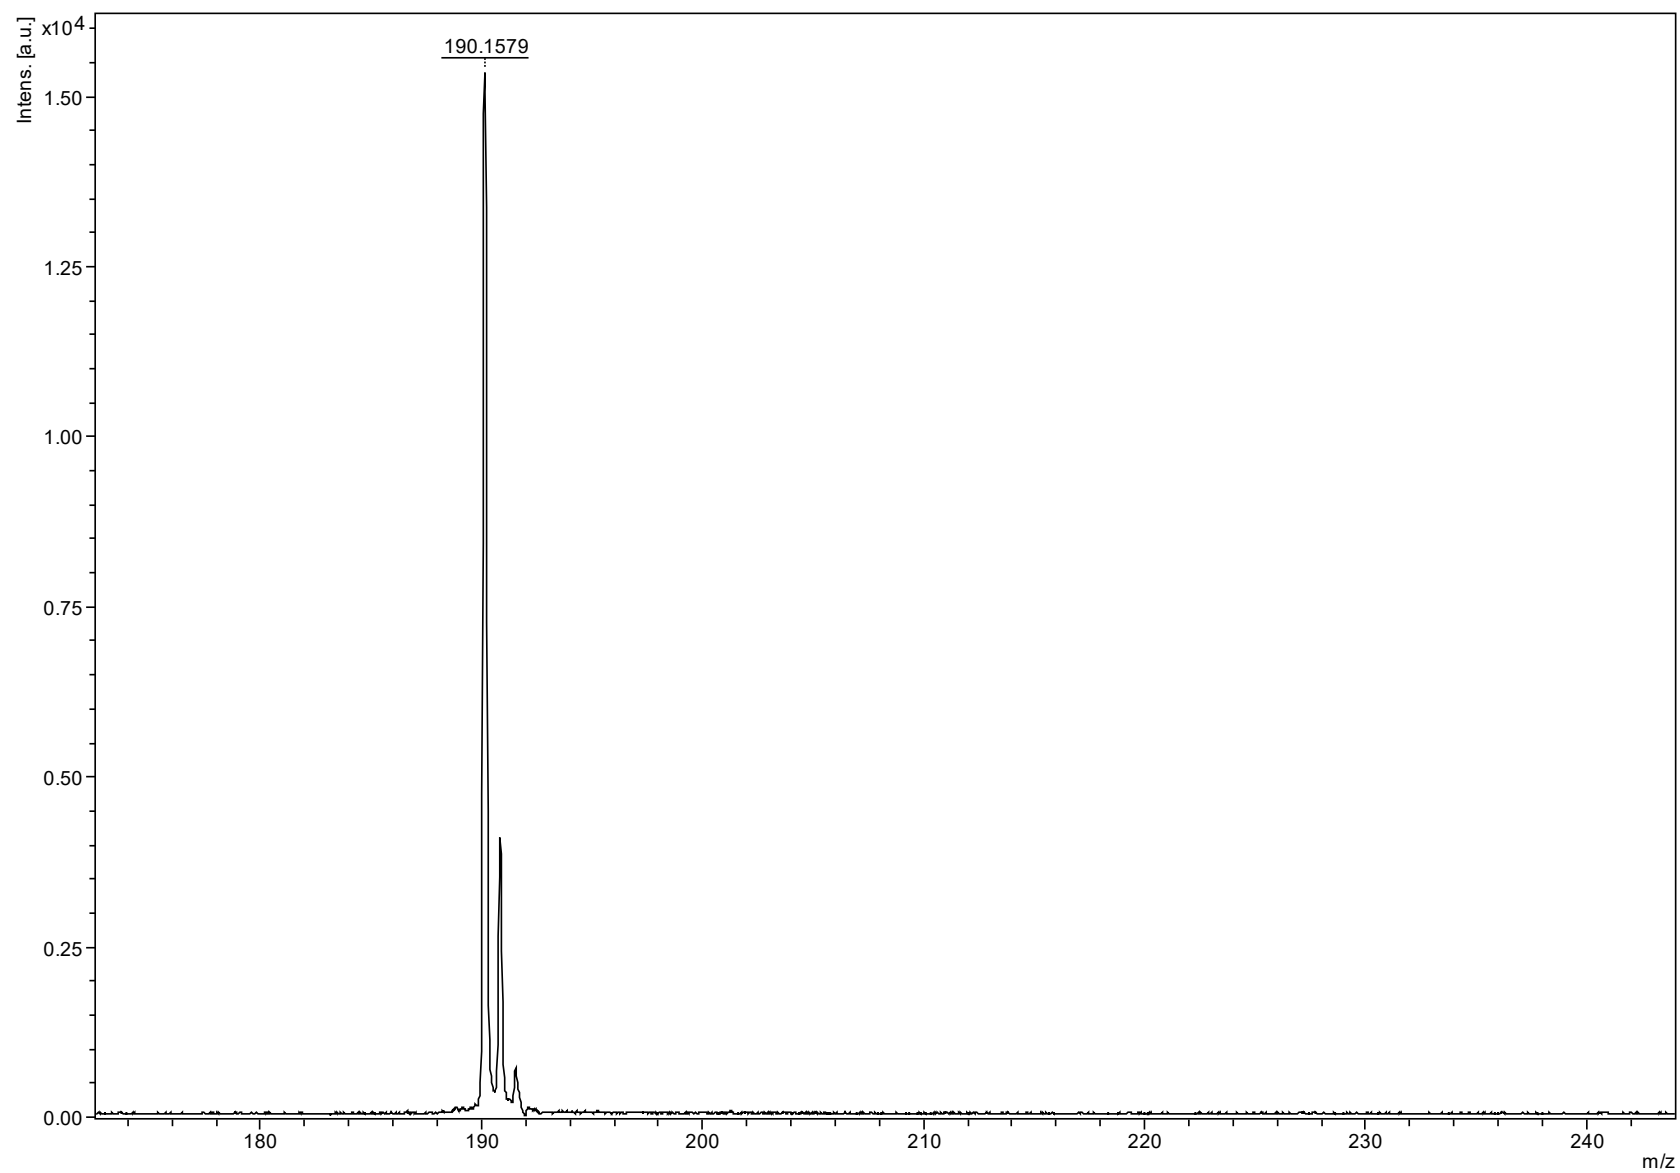

# <sup>1</sup>H NMR spectrum of compound **1c**

|                        |           |                   |          |                        |              |                |        |
|------------------------|-----------|-------------------|----------|------------------------|--------------|----------------|--------|
| Acquisition Time (sec) | 2.0972    | Date              |          |                        |              | Date Stamp     |        |
| File Name              |           |                   |          |                        |              |                |        |
| Frequency (MHz)        | 700.17    | Nucleus           | 1H       | Number of Transients   | 8            | Origin         | Avance |
| Original Points Count  | 32768     | Owner             | nmr      | Points Count           | 65536        | Pulse Sequence | zg30   |
| Receiver Gain          | 17.21     | SW(cyclical) (Hz) | 15625.00 | Solvent                | CHLOROFORM-d |                |        |
| Spectrum Offset (Hz)   | 6272.3657 | Sweep Width (Hz)  | 15624.76 | Temperature (degree C) | 24.988       |                |        |

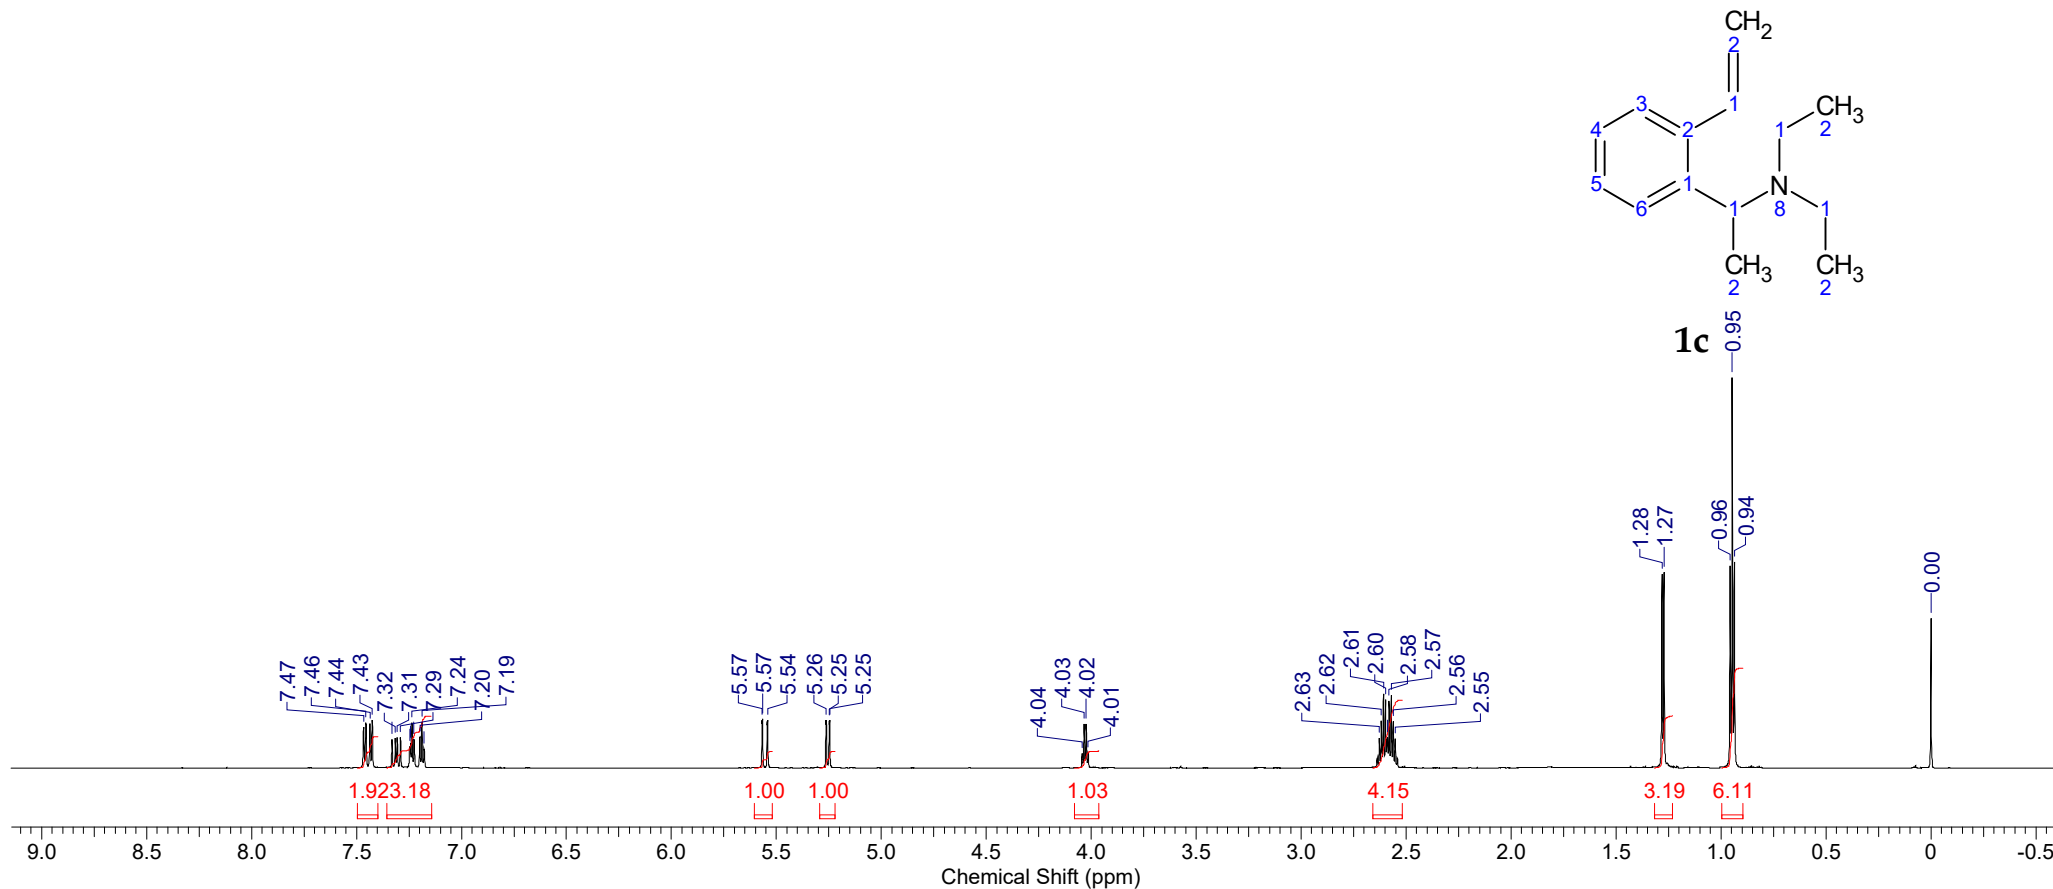



# $^1\text{H}$ NMR spectrum of compound **1c**

|                        |           |                   |          |                        |              |                |        |
|------------------------|-----------|-------------------|----------|------------------------|--------------|----------------|--------|
| Acquisition Time (sec) | 2.0972    | Date              |          |                        |              | Date Stamp     |        |
| File Name              |           |                   |          |                        |              |                |        |
| Frequency (MHz)        | 700.17    | Nucleus           | 1H       | Number of Transients   | 8            | Origin         | Avance |
| Original Points Count  | 32768     | Owner             | nmr      | Points Count           | 65536        | Pulse Sequence | zg30   |
| Receiver Gain          | 17.21     | SW(cyclical) (Hz) | 15625.00 | Solvent                | CHLOROFORM-d |                |        |
| Spectrum Offset (Hz)   | 6272.3657 | Sweep Width (Hz)  | 15624.76 | Temperature (degree C) | 24.988       |                |        |

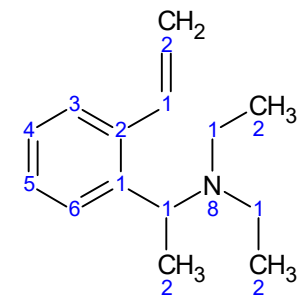

**1c**

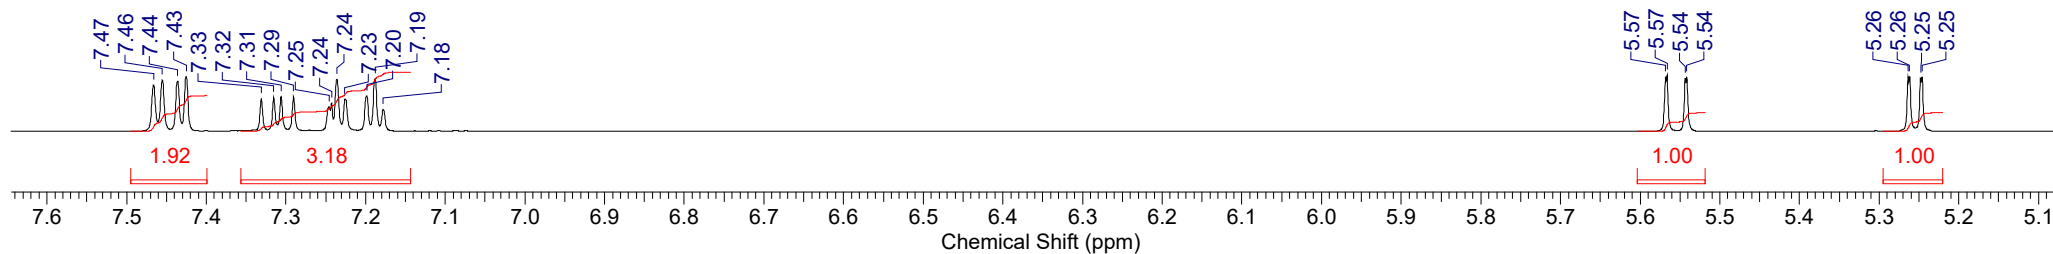

# <sup>1</sup>H NMR spectrum of compound **1c**

|                        |           |                   |          |                        |              |                |        |
|------------------------|-----------|-------------------|----------|------------------------|--------------|----------------|--------|
| Acquisition Time (sec) | 2.0972    | Date              |          |                        |              | Date Stamp     |        |
| File Name              |           |                   |          |                        |              |                |        |
| Frequency (MHz)        | 700.17    | Nucleus           | 1H       | Number of Transients   | 8            | Origin         | Avance |
| Original Points Count  | 32768     | Owner             | nmr      | Points Count           | 65536        | Pulse Sequence | zg30   |
| Receiver Gain          | 17.21     | SW(cyclical) (Hz) | 15625.00 | Solvent                | CHLOROFORM-d |                |        |
| Spectrum Offset (Hz)   | 6272.3657 | Sweep Width (Hz)  | 15624.76 | Temperature (degree C) | 24.988       |                |        |

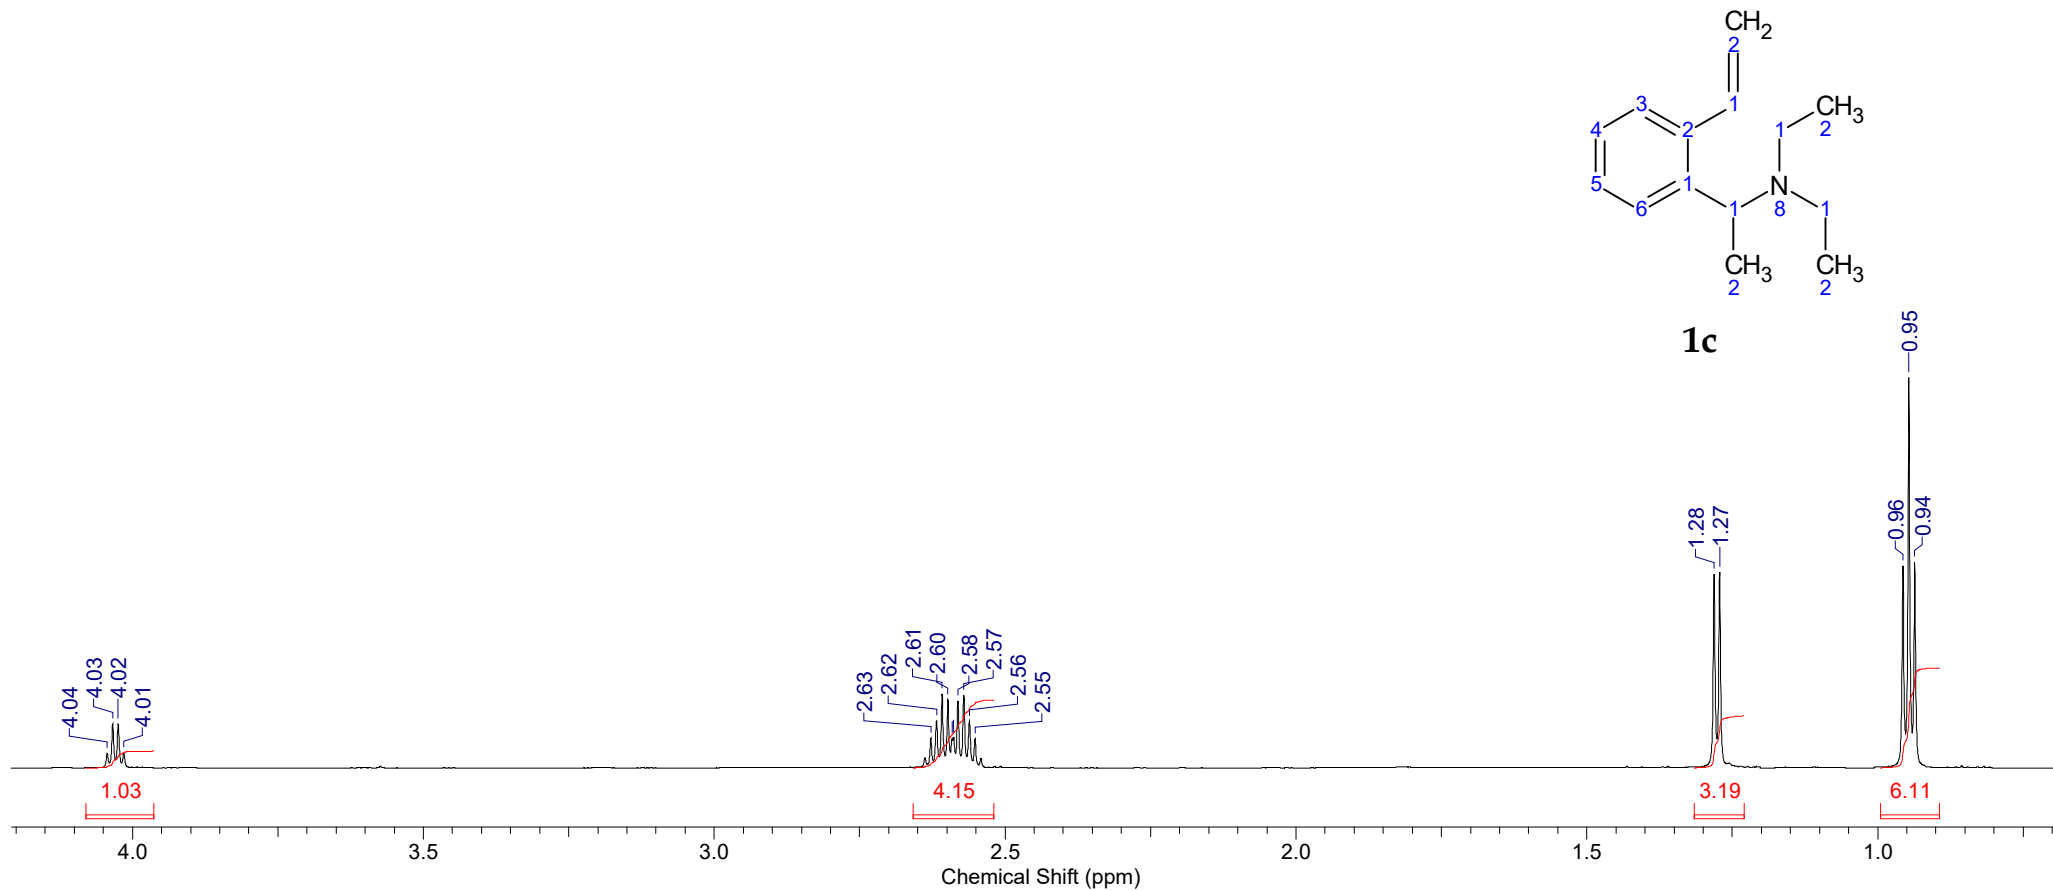

# $^{13}\text{C}$ NMR spectrum of compound **1c**

|                        |  |          |  |                        |  |              |  |
|------------------------|--|----------|--|------------------------|--|--------------|--|
| Acquisition Time (sec) |  | 0.7406   |  | Date                   |  | Date Stamp   |  |
| File Name              |  |          |  |                        |  |              |  |
| Frequency (MHz)        |  | 176.06   |  | Nucleus                |  | 13C          |  |
| Original Points Count  |  | 32768    |  | Number of Transients   |  | 400          |  |
| Receiver Gain          |  | 101.00   |  | Owner                  |  | nmr          |  |
| Sweep Width (Hz)       |  | 44246.44 |  | Points Count           |  | 32768        |  |
|                        |  |          |  | SW(cyclical) (Hz)      |  | 44247.79     |  |
|                        |  |          |  | Solvent                |  | CHLOROFORM-d |  |
|                        |  |          |  | Spectrum Offset (Hz)   |  | 19362.2637   |  |
|                        |  |          |  | Temperature (degree C) |  | 24.995       |  |
|                        |  |          |  |                        |  |              |  |
|                        |  |          |  |                        |  |              |  |
|                        |  |          |  |                        |  |              |  |
|                        |  |          |  |                        |  |              |  |
|                        |  |          |  |                        |  |              |  |
|                        |  |          |  |                        |  |              |  |
|                        |  |          |  |                        |  |              |  |
|                        |  |          |  |                        |  |              |  |
|                        |  |          |  |                        |  |              |  |
|                        |  |          |  |                        |  |              |  |
|                        |  |          |  |                        |  |              |  |
|                        |  |          |  |                        |  |              |  |
|                        |  |          |  |                        |  |              |  |
|                        |  |          |  |                        |  |              |  |
|                        |  |          |  |                        |  |              |  |
|                        |  |          |  |                        |  |              |  |
|                        |  |          |  |                        |  |              |  |
|                        |  |          |  |                        |  |              |  |
|                        |  |          |  |                        |  |              |  |
|                        |  |          |  |                        |  |              |  |
|                        |  |          |  |                        |  |              |  |
|                        |  |          |  |                        |  |              |  |
|                        |  |          |  |                        |  |              |  |
|                        |  |          |  |                        |  |              |  |
|                        |  |          |  |                        |  |              |  |
|                        |  |          |  |                        |  |              |  |
|                        |  |          |  |                        |  |              |  |
|                        |  |          |  |                        |  |              |  |
|                        |  |          |  |                        |  |              |  |
|                        |  |          |  |                        |  |              |  |
|                        |  |          |  |                        |  |              |  |
|                        |  |          |  |                        |  |              |  |
|                        |  |          |  |                        |  |              |  |
|                        |  |          |  |                        |  |              |  |
|                        |  |          |  |                        |  |              |  |
|                        |  |          |  |                        |  |              |  |
|                        |  |          |  |                        |  |              |  |
|                        |  |          |  |                        |  |              |  |
|                        |  |          |  |                        |  |              |  |
|                        |  |          |  |                        |  |              |  |
|                        |  |          |  |                        |  |              |  |
|                        |  |          |  |                        |  |              |  |
|                        |  |          |  |                        |  |              |  |
|                        |  |          |  |                        |  |              |  |
|                        |  |          |  |                        |  |              |  |
|                        |  |          |  |                        |  |              |  |
|                        |  |          |  |                        |  |              |  |
|                        |  |          |  |                        |  |              |  |
|                        |  |          |  |                        |  |              |  |
|                        |  |          |  |                        |  |              |  |
|                        |  |          |  |                        |  |              |  |
|                        |  |          |  |                        |  |              |  |
|                        |  |          |  |                        |  |              |  |
|                        |  |          |  |                        |  |              |  |
|                        |  |          |  |                        |  |              |  |
|                        |  |          |  |                        |  |              |  |
|                        |  |          |  |                        |  |              |  |
|                        |  |          |  |                        |  |              |  |
|                        |  |          |  |                        |  |              |  |
|                        |  |          |  |                        |  |              |  |
|                        |  |          |  |                        |  |              |  |
|                        |  |          |  |                        |  |              |  |
|                        |  |          |  |                        |  |              |  |
|                        |  |          |  |                        |  |              |  |
|                        |  |          |  |                        |  |              |  |
|                        |  |          |  |                        |  |              |  |
|                        |  |          |  |                        |  |              |  |
|                        |  |          |  |                        |  |              |  |
|                        |  |          |  |                        |  |              |  |
|                        |  |          |  |                        |  |              |  |
|                        |  |          |  |                        |  |              |  |
|                        |  |          |  |                        |  |              |  |
|                        |  |          |  |                        |  |              |  |
|                        |  |          |  |                        |  |              |  |
|                        |  |          |  |                        |  |              |  |
|                        |  |          |  |                        |  |              |  |
|                        |  |          |  |                        |  |              |  |
|                        |  |          |  |                        |  |              |  |
|                        |  |          |  |                        |  |              |  |
|                        |  |          |  |                        |  |              |  |
|                        |  |          |  |                        |  |              |  |
|                        |  |          |  |                        |  |              |  |
|                        |  |          |  |                        |  |              |  |
|                        |  |          |  |                        |  |              |  |
|                        |  |          |  |                        |  |              |  |
|                        |  |          |  |                        |  |              |  |
|                        |  |          |  |                        |  |              |  |
|                        |  |          |  |                        |  |              |  |
|                        |  |          |  |                        |  |              |  |
|                        |  |          |  |                        |  |              |  |
|                        |  |          |  |                        |  |              |  |
|                        |  |          |  |                        |  |              |  |
|                        |  |          |  |                        |  |              |  |
|                        |  |          |  |                        |  |              |  |
|                        |  |          |  |                        |  |              |  |
|                        |  |          |  |                        |  |              |  |
|                        |  |          |  |                        |  |              |  |
|                        |  |          |  |                        |  |              |  |
|                        |  |          |  |                        |  |              |  |
|                        |  |          |  |                        |  |              |  |
|                        |  |          |  |                        |  |              |  |
|                        |  |          |  |                        |  |              |  |
|                        |  |          |  |                        |  |              |  |
|                        |  |          |  |                        |  |              |  |
|                        |  |          |  |                        |  |              |  |
|                        |  |          |  |                        |  |              |  |
|                        |  |          |  |                        |  |              |  |
|                        |  |          |  |                        |  |              |  |
|                        |  |          |  |                        |  |              |  |
|                        |  |          |  |                        |  |              |  |
|                        |  |          |  |                        |  |              |  |
|                        |  |          |  |                        |  |              |  |
|                        |  |          |  |                        |  |              |  |
|                        |  |          |  |                        |  |              |  |
|                        |  |          |  |                        |  |              |  |
|                        |  |          |  |                        |  |              |  |
|                        |  |          |  |                        |  |              |  |
|                        |  |          |  |                        |  |              |  |
|                        |  |          |  |                        |  |              |  |
|                        |  |          |  |                        |  |              |  |
|                        |  |          |  |                        |  |              |  |
|                        |  |          |  |                        |  |              |  |
|                        |  |          |  |                        |  |              |  |
|                        |  |          |  |                        |  |              |  |
|                        |  |          |  |                        |  |              |  |
|                        |  |          |  |                        |  |              |  |
|                        |  |          |  |                        |  |              |  |
|                        |  |          |  |                        |  |              |  |
|                        |  |          |  |                        |  |              |  |
|                        |  |          |  |                        |  |              |  |
|                        |  |          |  |                        |  |              |  |
|                        |  |          |  |                        |  |              |  |
|                        |  |          |  |                        |  |              |  |
|                        |  |          |  |                        |  |              |  |
|                        |  |          |  |                        |  |              |  |
|                        |  |          |  |                        |  |              |  |
|                        |  |          |  |                        |  |              |  |
|                        |  |          |  |                        |  |              |  |
|                        |  |          |  |                        |  |              |  |
|                        |  |          |  |                        |  |              |  |
|                        |  |          |  |                        |  |              |  |
|                        |  |          |  |                        |  |              |  |
|                        |  |          |  |                        |  |              |  |
|                        |  |          |  |                        |  |              |  |
|                        |  |          |  |                        |  |              |  |
|                        |  |          |  |                        |  |              |  |
|                        |  |          |  |                        |  |              |  |
|                        |  |          |  |                        |  |              |  |
|                        |  |          |  |                        |  |              |  |
|                        |  |          |  |                        |  |              |  |

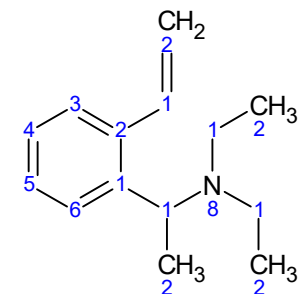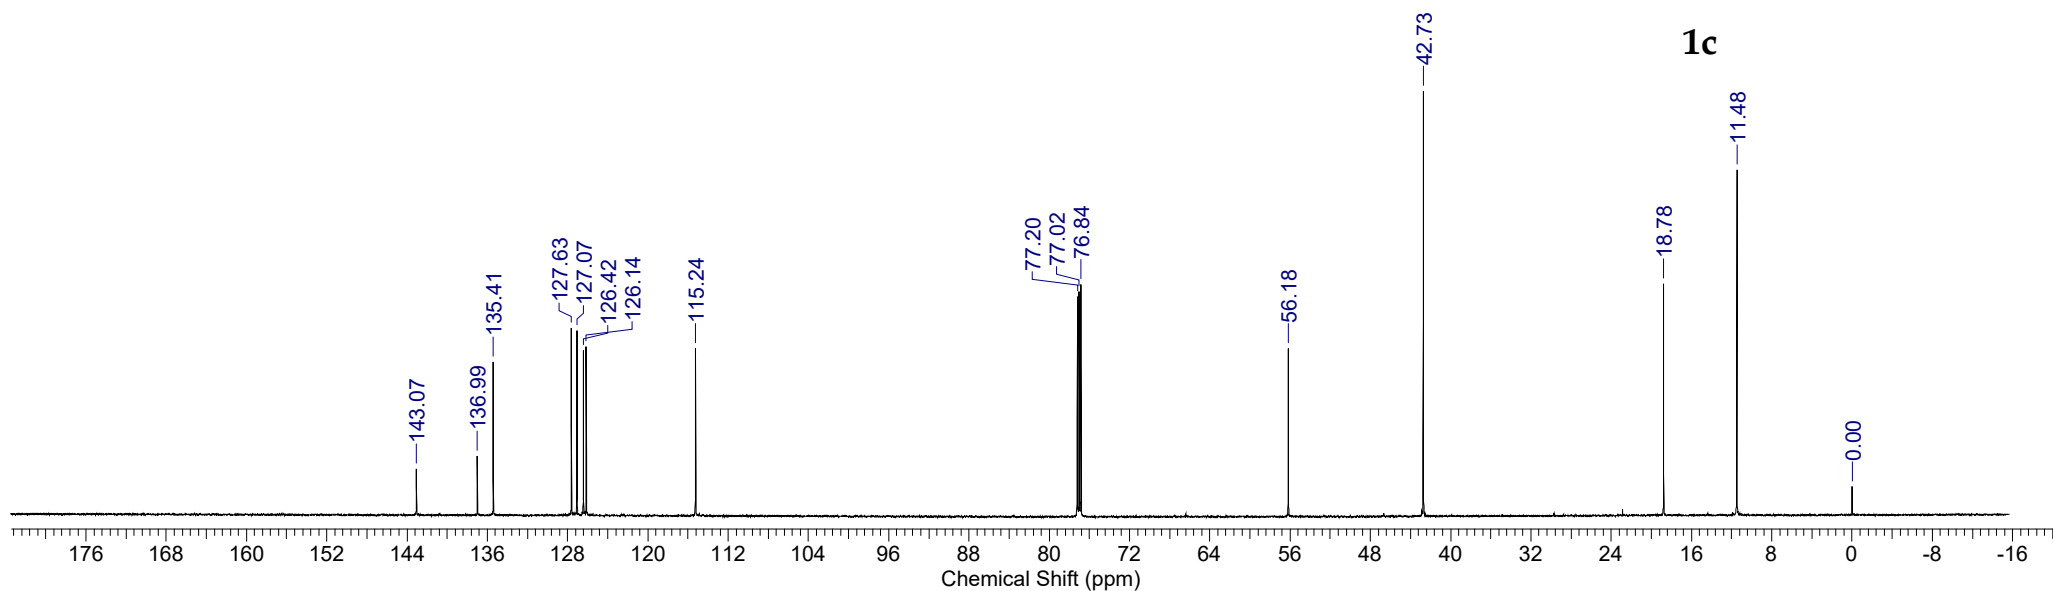

# $^{13}\text{C}$ NMR spectrum of compound **1c**

|                        |          |                        |          |                      |              |                      |            |
|------------------------|----------|------------------------|----------|----------------------|--------------|----------------------|------------|
| Acquisition Time (sec) | 0.7406   | Date                   |          |                      |              | Date Stamp           |            |
| File Name              |          |                        |          |                      |              |                      |            |
| Frequency (MHz)        | 176.06   | Nucleus                | 13C      | Number of Transients | 400          | Origin               | Avance     |
| Original Points Count  | 32768    | Owner                  | nmr      | Points Count         | 32768        | Pulse Sequence       | zgpg30     |
| Receiver Gain          | 101.00   | SW(cyclical) (Hz)      | 44247.79 | Solvent              | CHLOROFORM-d | Spectrum Offset (Hz) | 19362.2637 |
| Sweep Width (Hz)       | 44246.44 | Temperature (degree C) | 24.995   |                      |              |                      |            |

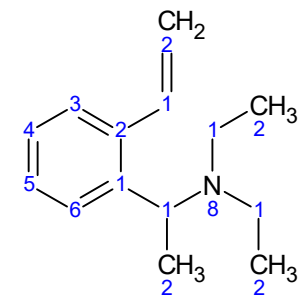

**1c**

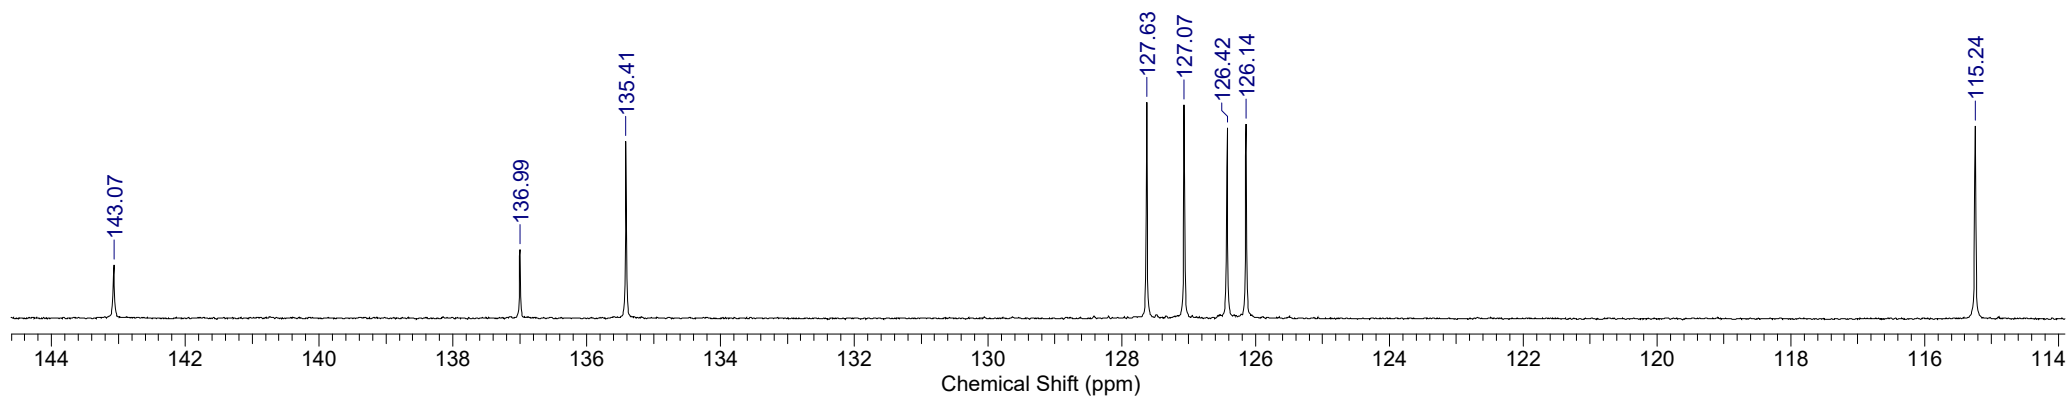

# $^{13}\text{C}$ NMR spectrum of compound **1c**

|                        |          |                        |          |                      |              |                      |            |
|------------------------|----------|------------------------|----------|----------------------|--------------|----------------------|------------|
| Acquisition Time (sec) | 0.7406   | Date                   |          |                      |              | Date Stamp           |            |
| File Name              |          |                        |          |                      |              |                      |            |
| Frequency (MHz)        | 176.06   | Nucleus                | 13C      | Number of Transients | 400          | Origin               | Avance     |
| Original Points Count  | 32768    | Owner                  | nmr      | Points Count         | 32768        | Pulse Sequence       | zgpg30     |
| Receiver Gain          | 101.00   | SW(cyclical) (Hz)      | 44247.79 | Solvent              | CHLOROFORM-d | Spectrum Offset (Hz) | 19362.2637 |
| Sweep Width (Hz)       | 44246.44 | Temperature (degree C) | 24.995   |                      |              |                      |            |

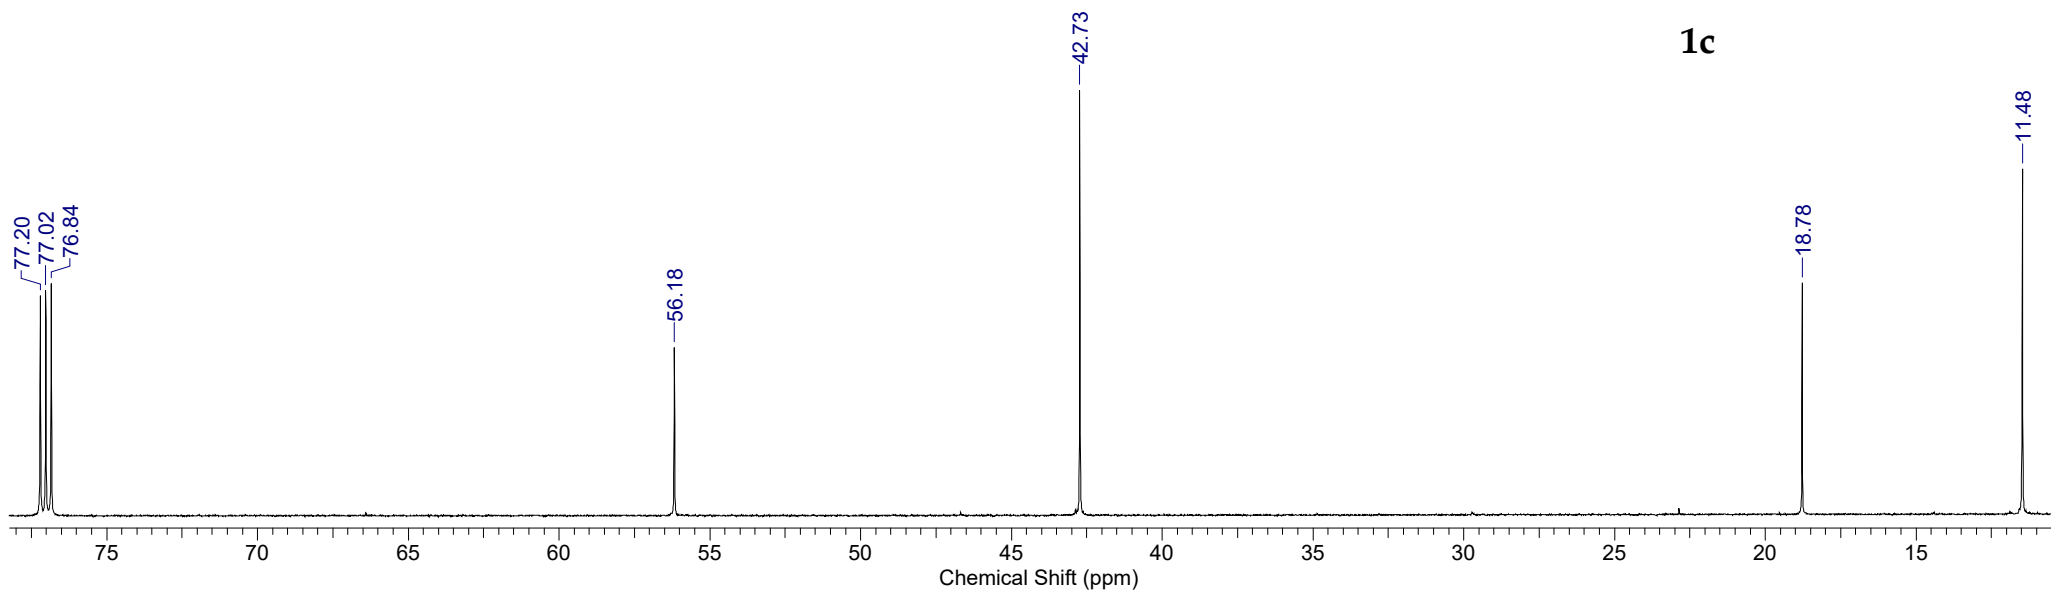

IR spectrum of compound **1c**

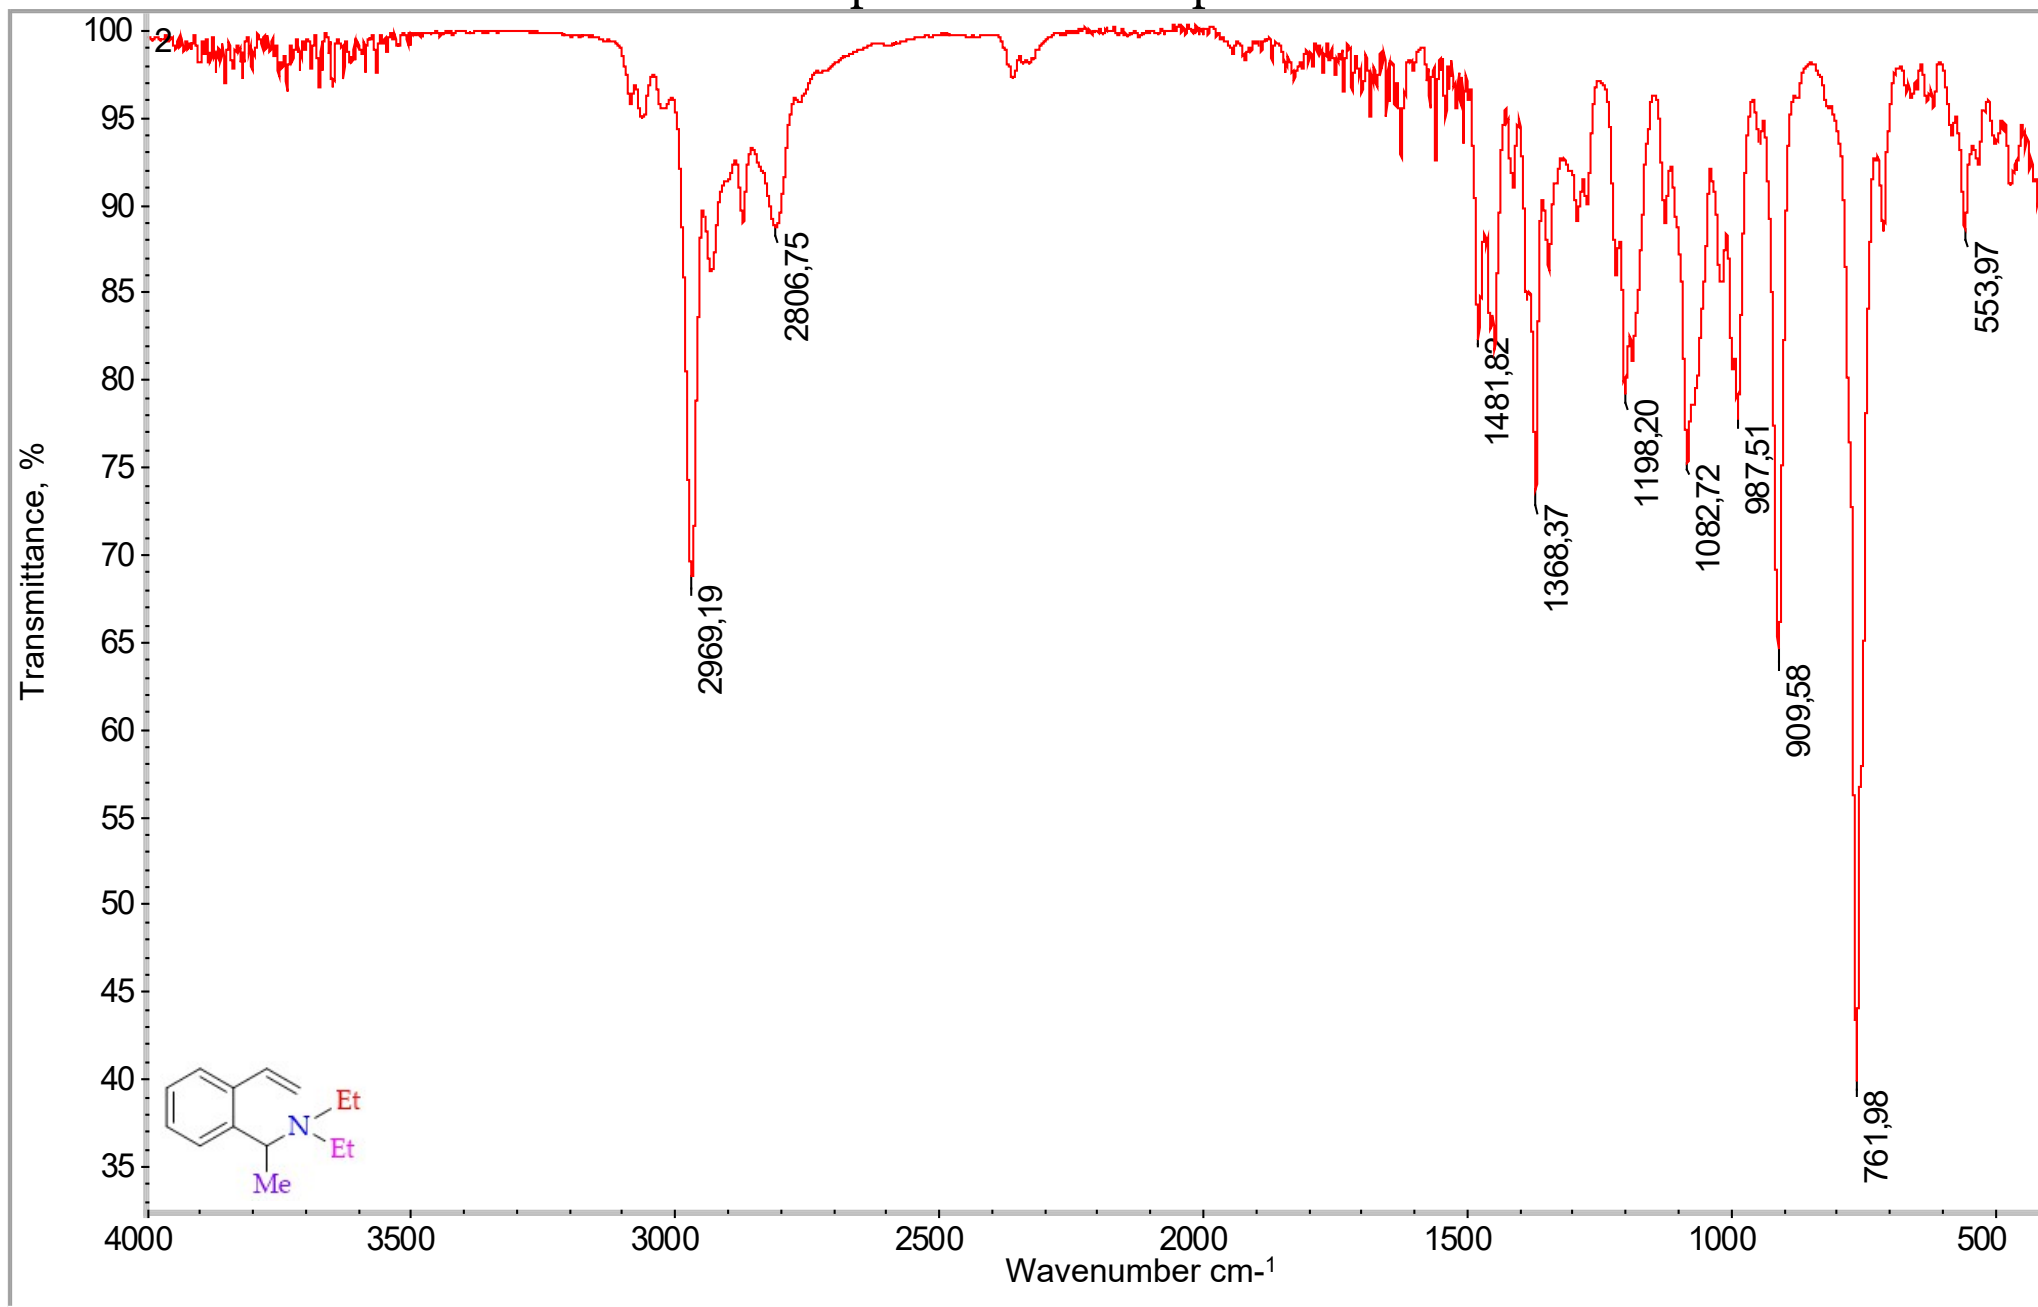

# HRMS (MALDI-TOF) spectrum of compound **1c**

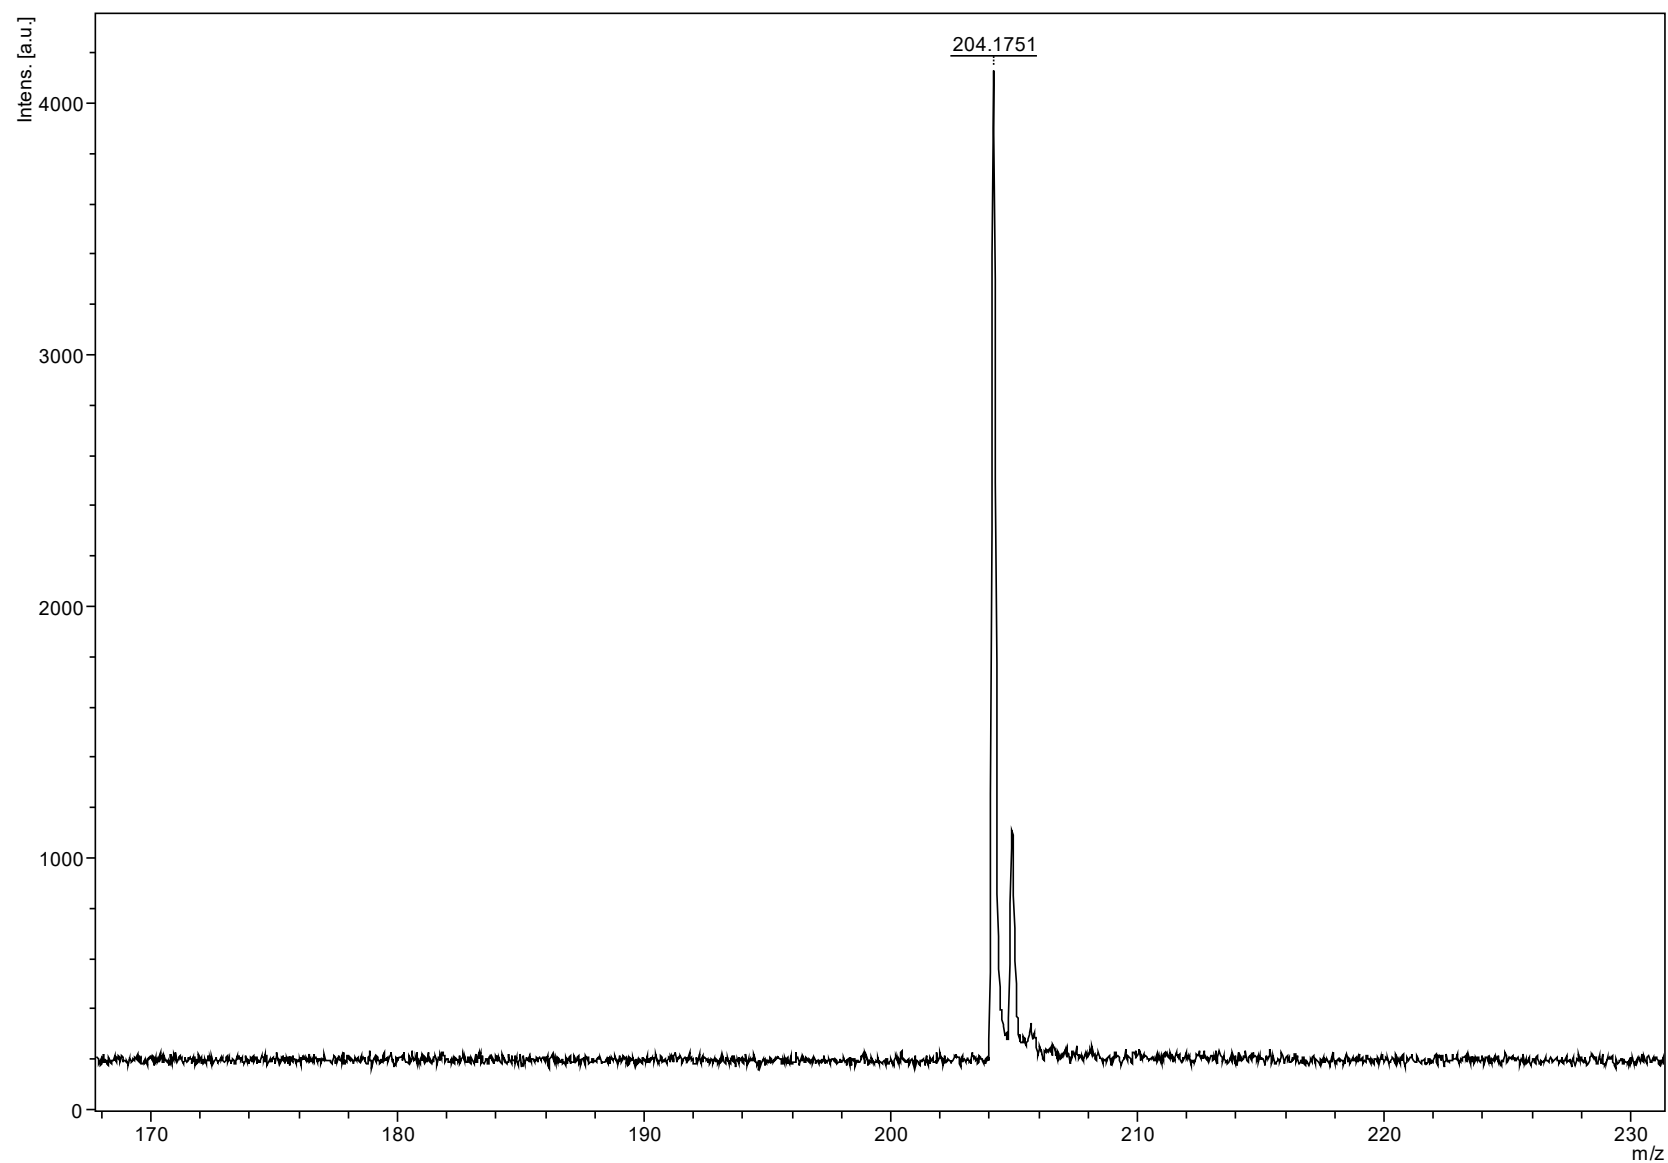

# $^1\text{H}$ NMR spectrum of compound **1d**

|                                      |  |                                       |  |                                        |  |
|--------------------------------------|--|---------------------------------------|--|----------------------------------------|--|
| <b>Acquisition Time (sec)</b> 1.9818 |  | <b>Comment</b> single pulse           |  | <b>Date</b>                            |  |
| <b>Date Stamp</b>                    |  |                                       |  |                                        |  |
| <b>File Name</b>                     |  |                                       |  | <b>Frequency (MHz)</b> 600.17          |  |
| <b>Nucleus</b> 1H                    |  | <b>Number of Transients</b> 8         |  | <b>Origin</b> ECA 600                  |  |
|                                      |  |                                       |  | <b>Original Points Count</b> 32768     |  |
| <b>Owner</b> CKP                     |  | <b>Points Count</b> 32768             |  | <b>Pulse Sequence</b> single_pulse.ex2 |  |
|                                      |  |                                       |  | <b>Receiver Gain</b> 24.00             |  |
| <b>Solvent</b> CHLOROFORM-d          |  | <b>Spectrum Offset (Hz)</b> 5394.4800 |  | <b>Sweep Width (Hz)</b> 16534.39       |  |
|                                      |  |                                       |  |                                        |  |

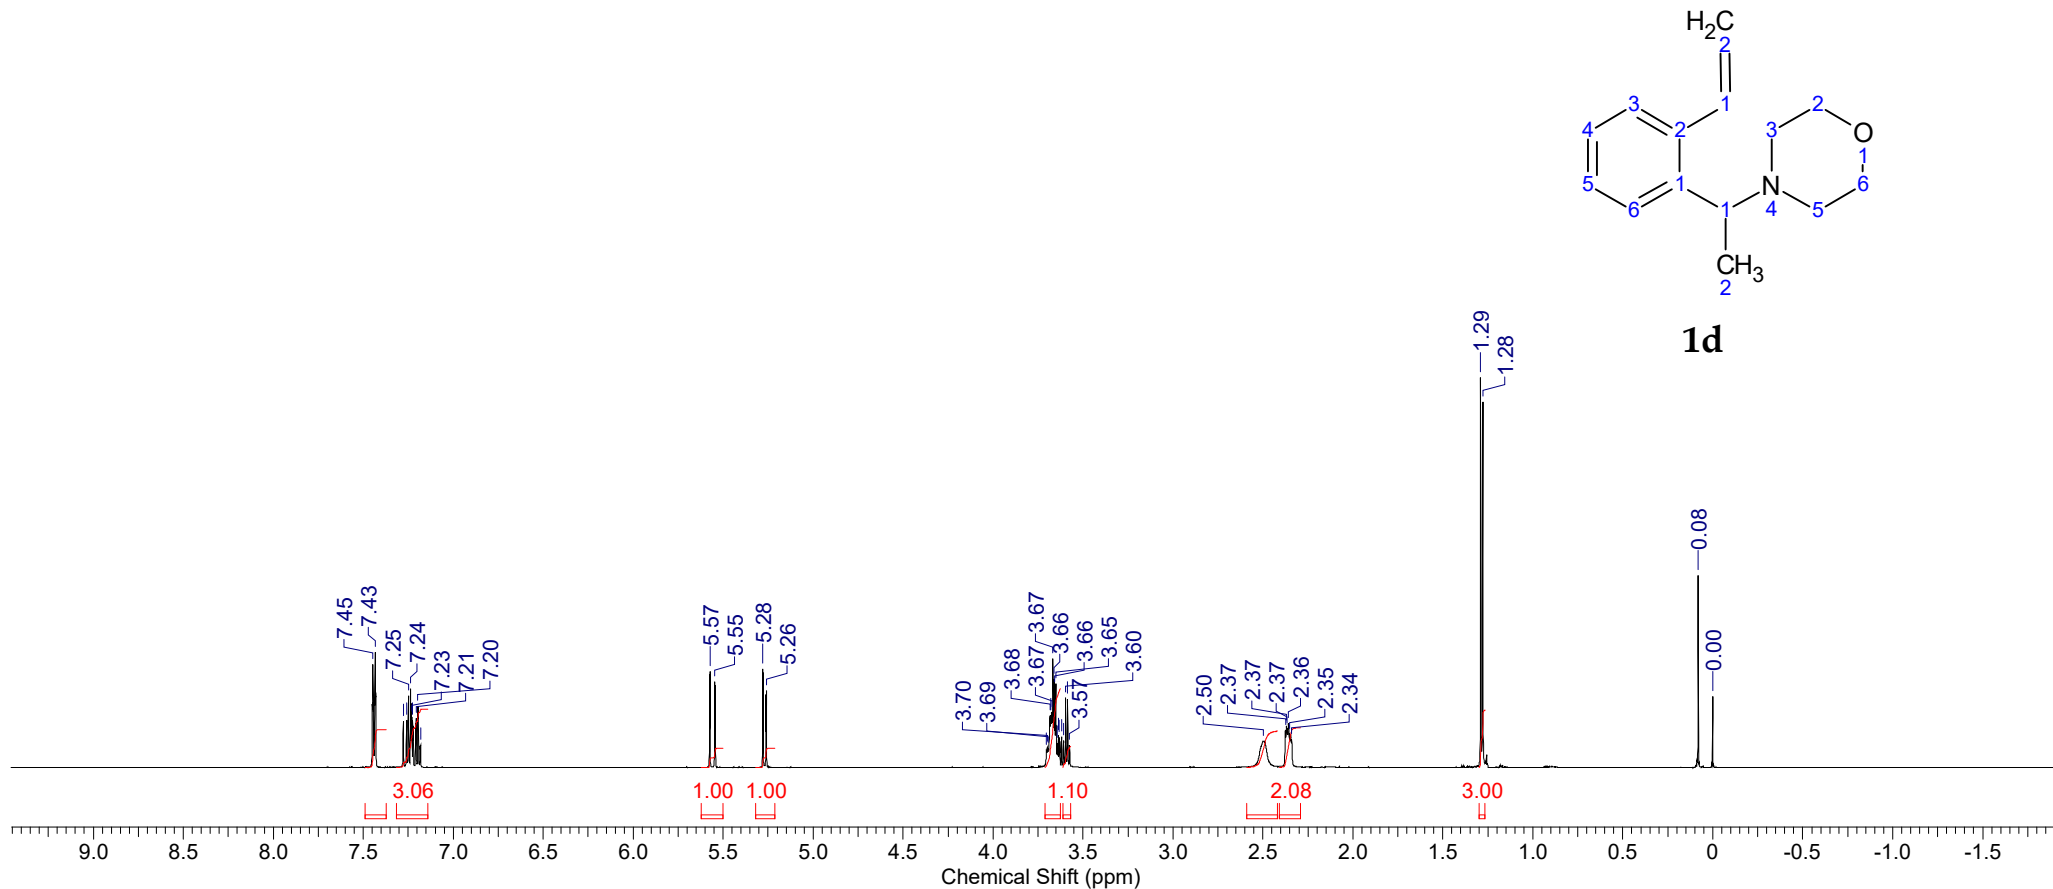



# $^1\text{H}$ NMR spectrum of compound **1d**

|                                      |  |                                       |                                        |                                    |
|--------------------------------------|--|---------------------------------------|----------------------------------------|------------------------------------|
| <b>Acquisition Time (sec)</b> 1.9818 |  | <b>Comment</b> single pulse           | <b>Date</b>                            |                                    |
| <b>Date Stamp</b>                    |  |                                       |                                        |                                    |
| <b>File Name</b>                     |  |                                       | <b>Frequency (MHz)</b> 600.17          |                                    |
| <b>Nucleus</b> $^1\text{H}$          |  | <b>Number of Transients</b> 8         | <b>Origin</b> ECA 600                  | <b>Original Points Count</b> 32768 |
| <b>Owner</b> CKP                     |  | <b>Points Count</b> 32768             | <b>Pulse Sequence</b> single_pulse.ex2 | <b>Receiver Gain</b> 24.00         |
| <b>Solvent</b> CHLOROFORM-d          |  | <b>Spectrum Offset (Hz)</b> 5394.4800 | <b>Sweep Width (Hz)</b> 16534.39       |                                    |

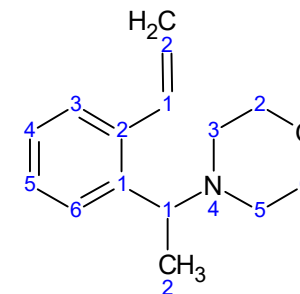

**1d**

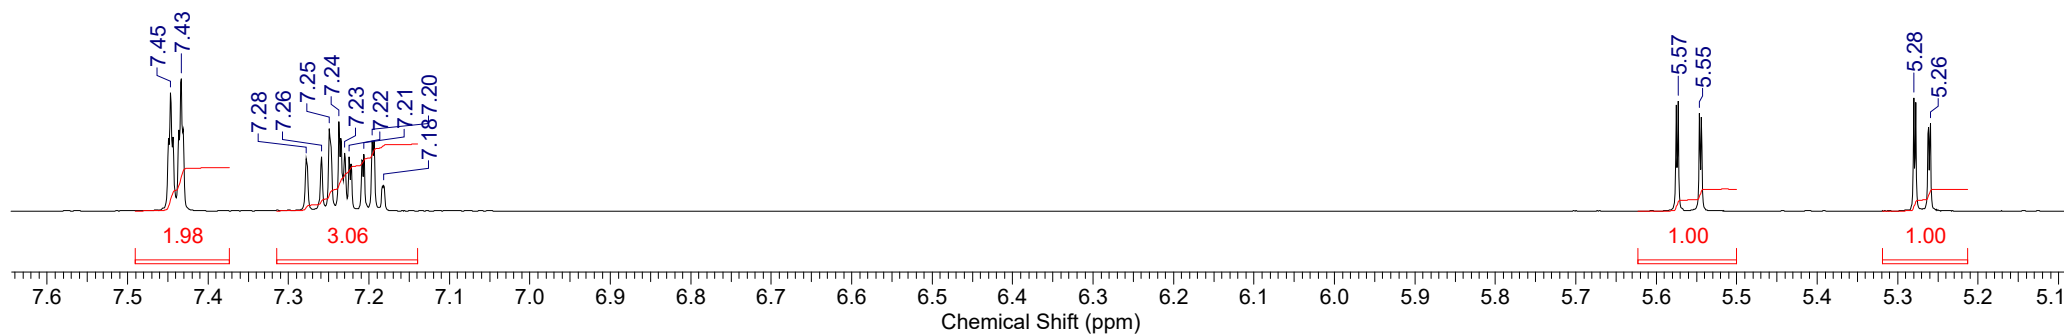

# $^1\text{H}$ NMR spectrum of compound **1d**

|                                      |  |                                       |                                        |                                    |
|--------------------------------------|--|---------------------------------------|----------------------------------------|------------------------------------|
| <b>Acquisition Time (sec)</b> 1.9818 |  | <b>Comment</b> single pulse           | <b>Date</b>                            |                                    |
| <b>Date Stamp</b>                    |  |                                       |                                        |                                    |
| <b>File Name</b>                     |  |                                       | <b>Frequency (MHz)</b> 600.17          |                                    |
| <b>Nucleus</b> $^1\text{H}$          |  | <b>Number of Transients</b> 8         | <b>Origin</b> ECA 600                  | <b>Original Points Count</b> 32768 |
| <b>Owner</b> CKP                     |  | <b>Points Count</b> 32768             | <b>Pulse Sequence</b> single_pulse.ex2 | <b>Receiver Gain</b> 24.00         |
| <b>Solvent</b> CHLOROFORM-d          |  | <b>Spectrum Offset (Hz)</b> 5394.4800 | <b>Sweep Width (Hz)</b> 16534.39       |                                    |

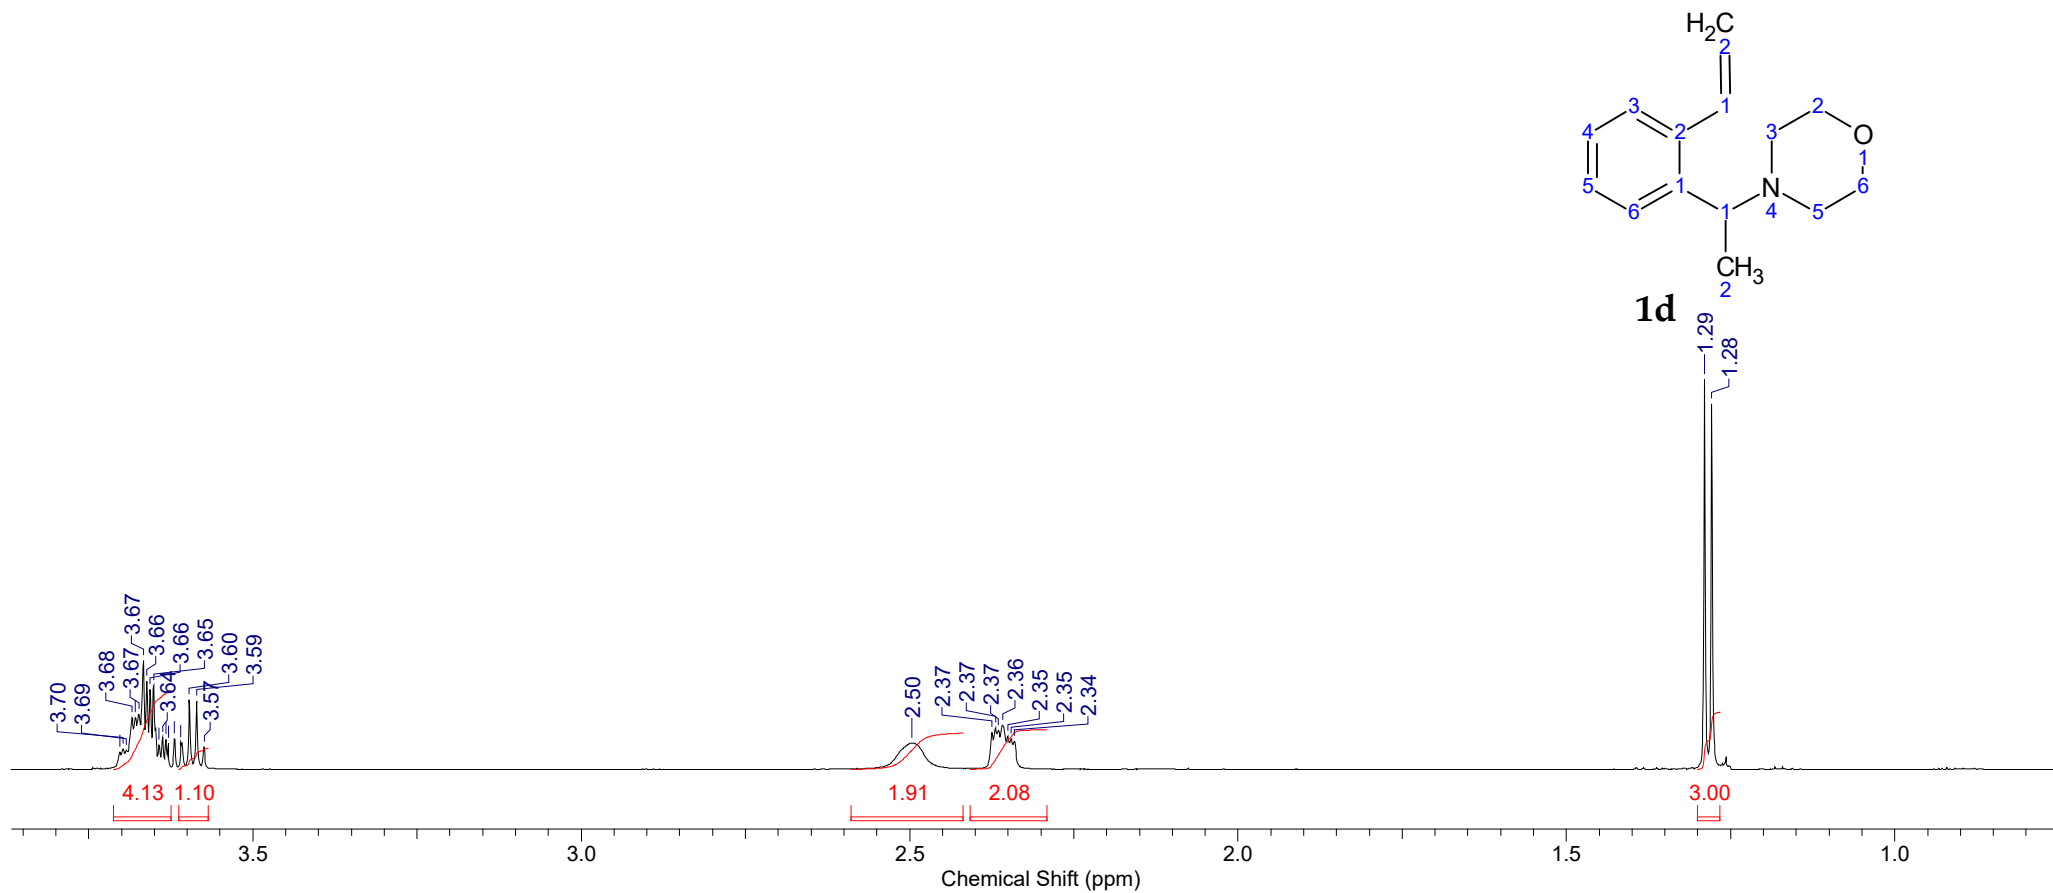

# $^{13}\text{C}$ NMR spectrum of compound **1d**

|                                      |              |                                                 |            |                              |                  |
|--------------------------------------|--------------|-------------------------------------------------|------------|------------------------------|------------------|
| <b>Acquisition Time (sec)</b> 0.6921 |              | <b>Comment</b> single pulse decoupled gated NOE |            | <b>Date</b>                  |                  |
| <b>Date Stamp</b>                    |              |                                                 |            |                              |                  |
| <b>File Name</b>                     |              |                                                 |            | <b>Frequency (MHz)</b>       | 150.91           |
| <b>Nucleus</b>                       | 13C          | <b>Number of Transients</b>                     | 1000       | <b>Origin</b>                | ECA 600          |
|                                      |              |                                                 |            | <b>Original Points Count</b> | 32768            |
| <b>Owner</b>                         | CKP          | <b>Points Count</b>                             | 32768      | <b>Pulse Sequence</b>        | single pulse dec |
|                                      |              |                                                 |            | <b>Receiver Gain</b>         | 58.00            |
| <b>Solvent</b>                       | CHLOROFORM-d | <b>Spectrum Offset (Hz)</b>                     | 15072.1279 | <b>Sweep Width (Hz)</b>      | 47348.49         |
|                                      |              |                                                 |            |                              |                  |

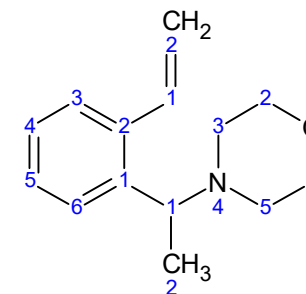

**1d**

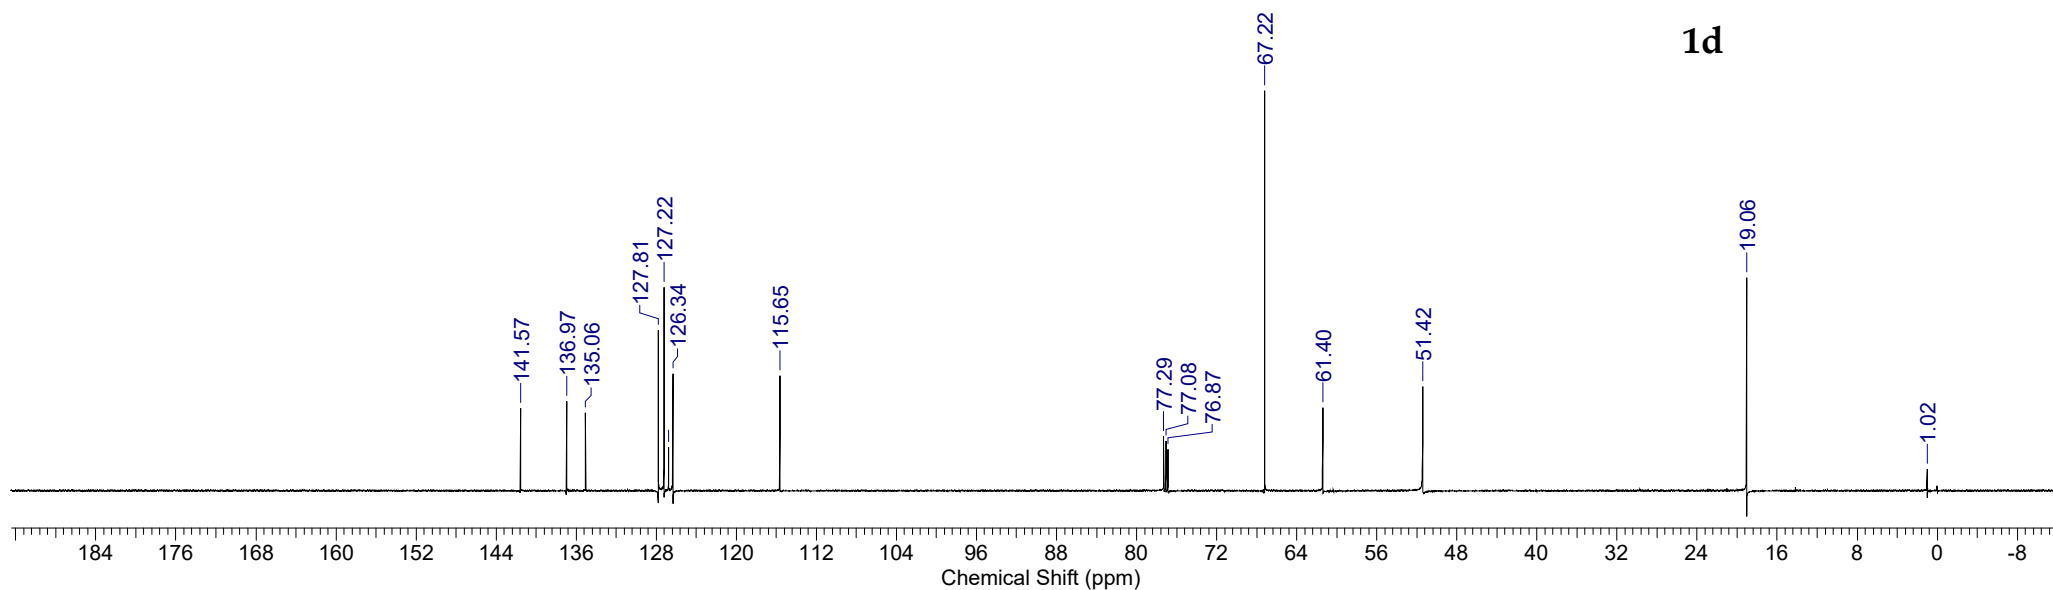

# $^{13}\text{C}$ NMR spectrum of compound **1d**

|                                      |              |                                                 |            |                         |                  |
|--------------------------------------|--------------|-------------------------------------------------|------------|-------------------------|------------------|
| <b>Acquisition Time (sec)</b> 0.6921 |              | <b>Comment</b> single pulse decoupled gated NOE |            | <b>Date</b>             |                  |
| <b>Date Stamp</b>                    |              |                                                 |            |                         |                  |
| <b>File Name</b>                     |              |                                                 |            | <b>Frequency (MHz)</b>  | 150.91           |
| <b>Nucleus</b>                       | 13C          | <b>Number of Transients</b>                     | 1000       | <b>Origin</b>           | ECA 600          |
|                                      |              | <b>Original Points Count</b>                    | 32768      |                         |                  |
| <b>Owner</b>                         | CKP          | <b>Points Count</b>                             | 32768      | <b>Pulse Sequence</b>   | single pulse dec |
|                                      |              | <b>Receiver Gain</b>                            | 58.00      |                         |                  |
| <b>Solvent</b>                       | CHLOROFORM-d | <b>Spectrum Offset (Hz)</b>                     | 15072.1279 | <b>Sweep Width (Hz)</b> | 47348.49         |
|                                      |              |                                                 |            |                         |                  |



**1d**

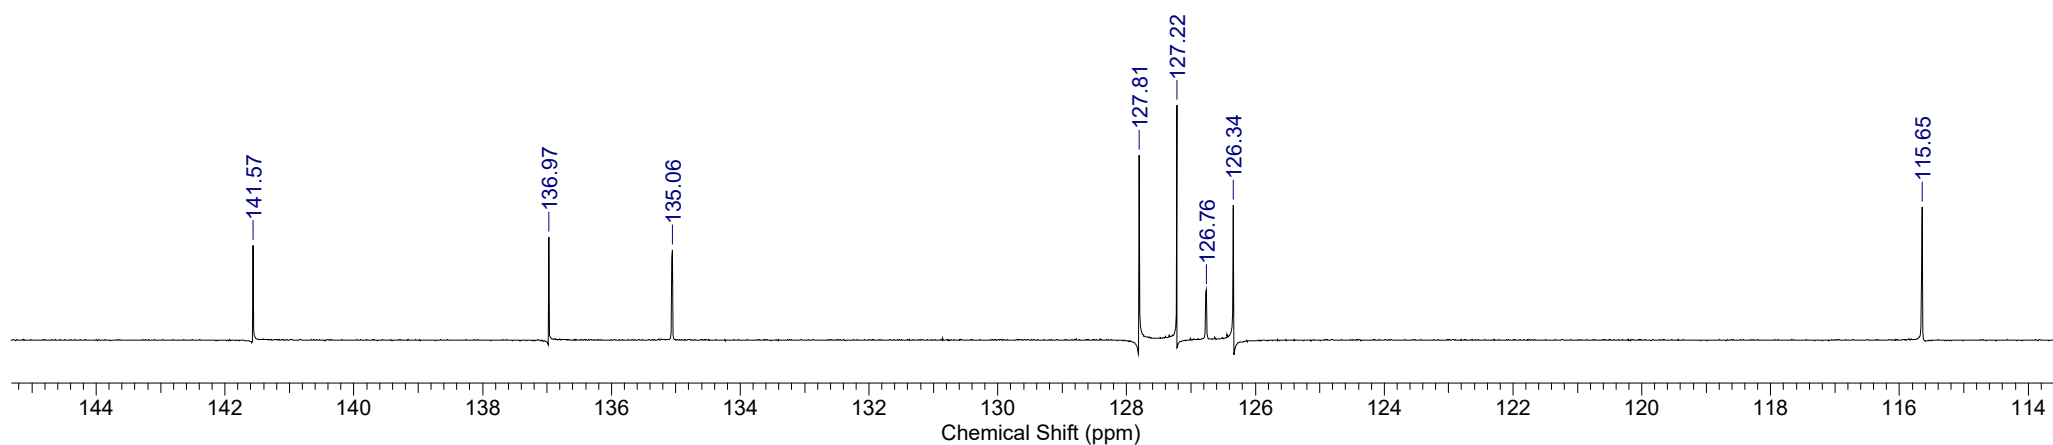

# $^{13}\text{C}$ NMR spectrum of compound **1d**

|                                      |              |                                                 |            |                              |                  |
|--------------------------------------|--------------|-------------------------------------------------|------------|------------------------------|------------------|
| <b>Acquisition Time (sec)</b> 0.6921 |              | <b>Comment</b> single pulse decoupled gated NOE |            | <b>Date</b>                  |                  |
| <b>Date Stamp</b>                    |              |                                                 |            |                              |                  |
| <b>File Name</b>                     |              |                                                 |            | <b>Frequency (MHz)</b>       | 150.91           |
| <b>Nucleus</b>                       | 13C          | <b>Number of Transients</b>                     | 1000       | <b>Origin</b>                | ECA 600          |
|                                      |              |                                                 |            | <b>Original Points Count</b> | 32768            |
| <b>Owner</b>                         | CKP          | <b>Points Count</b>                             | 32768      | <b>Pulse Sequence</b>        | single pulse dec |
|                                      |              |                                                 |            | <b>Receiver Gain</b>         | 58.00            |
| <b>Solvent</b>                       | CHLOROFORM-d | <b>Spectrum Offset (Hz)</b>                     | 15072.1279 | <b>Sweep Width (Hz)</b>      | 47348.49         |
|                                      |              |                                                 |            |                              |                  |



**1d**

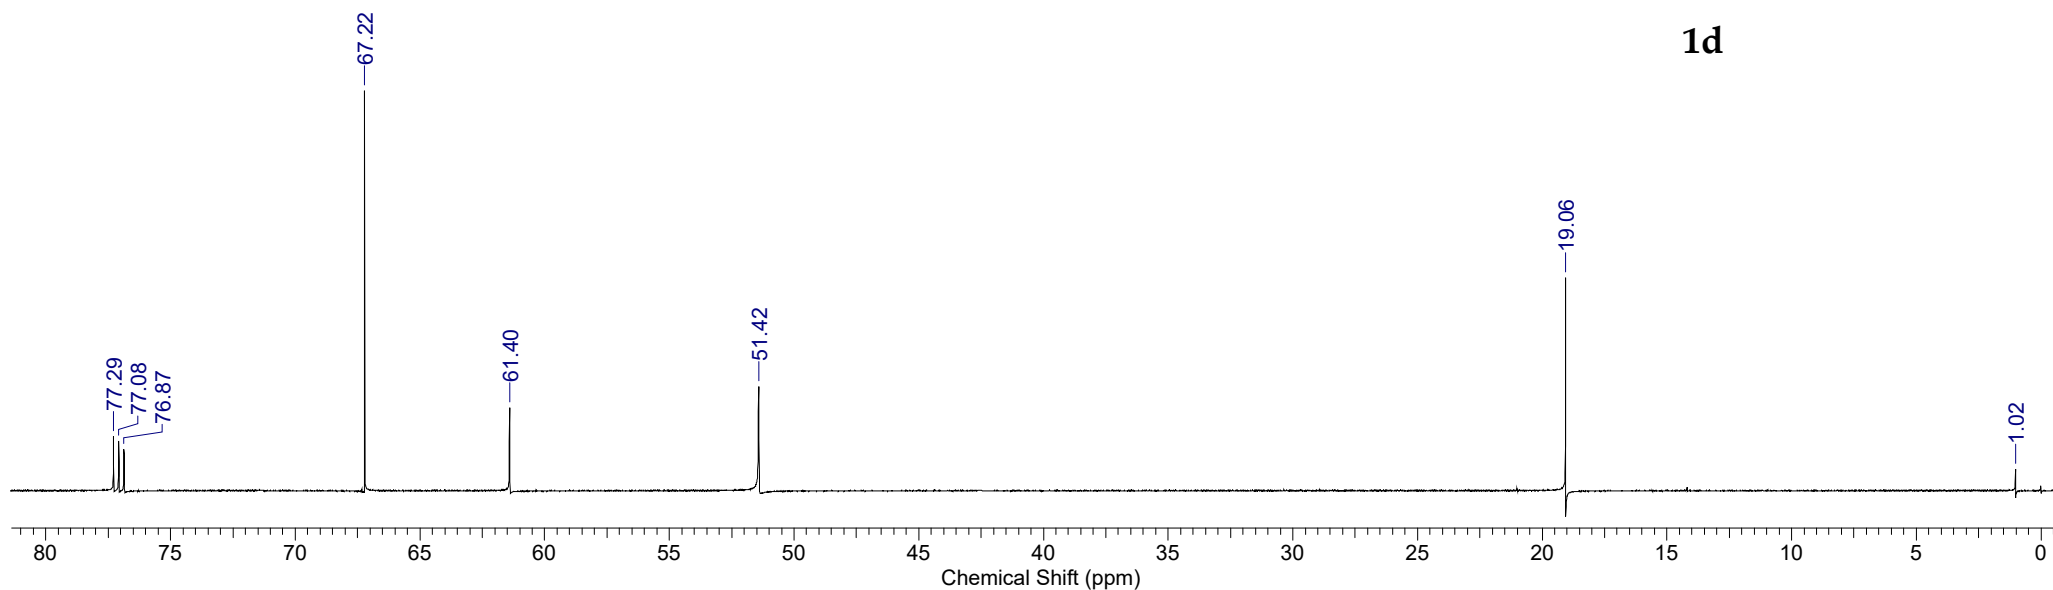

# IR spectrum of compound **1d**

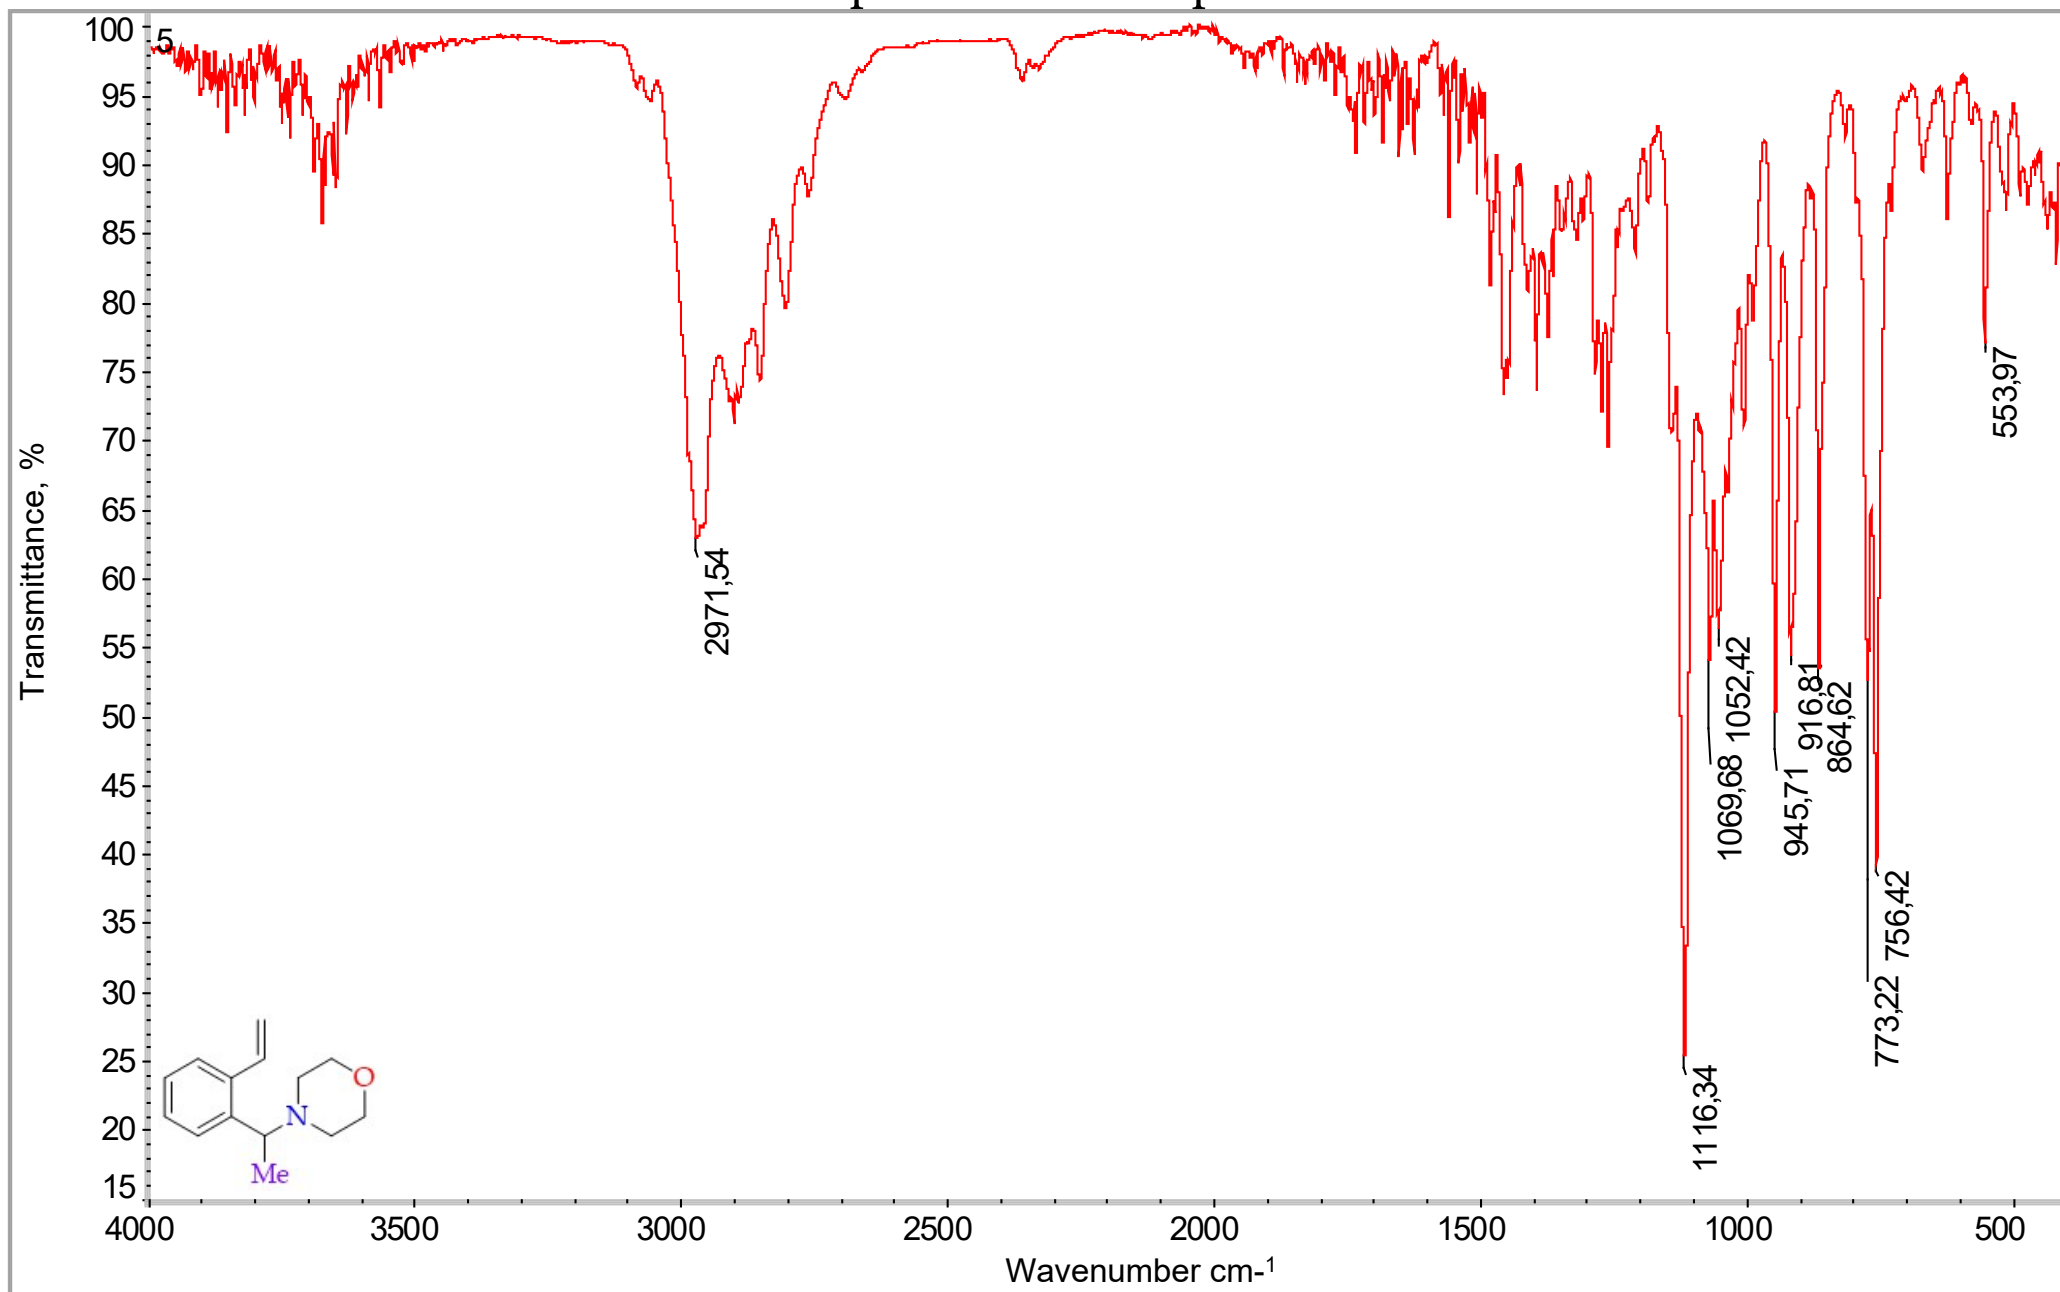

# HRMS (MALDI-TOF) spectrum of compound **1d**

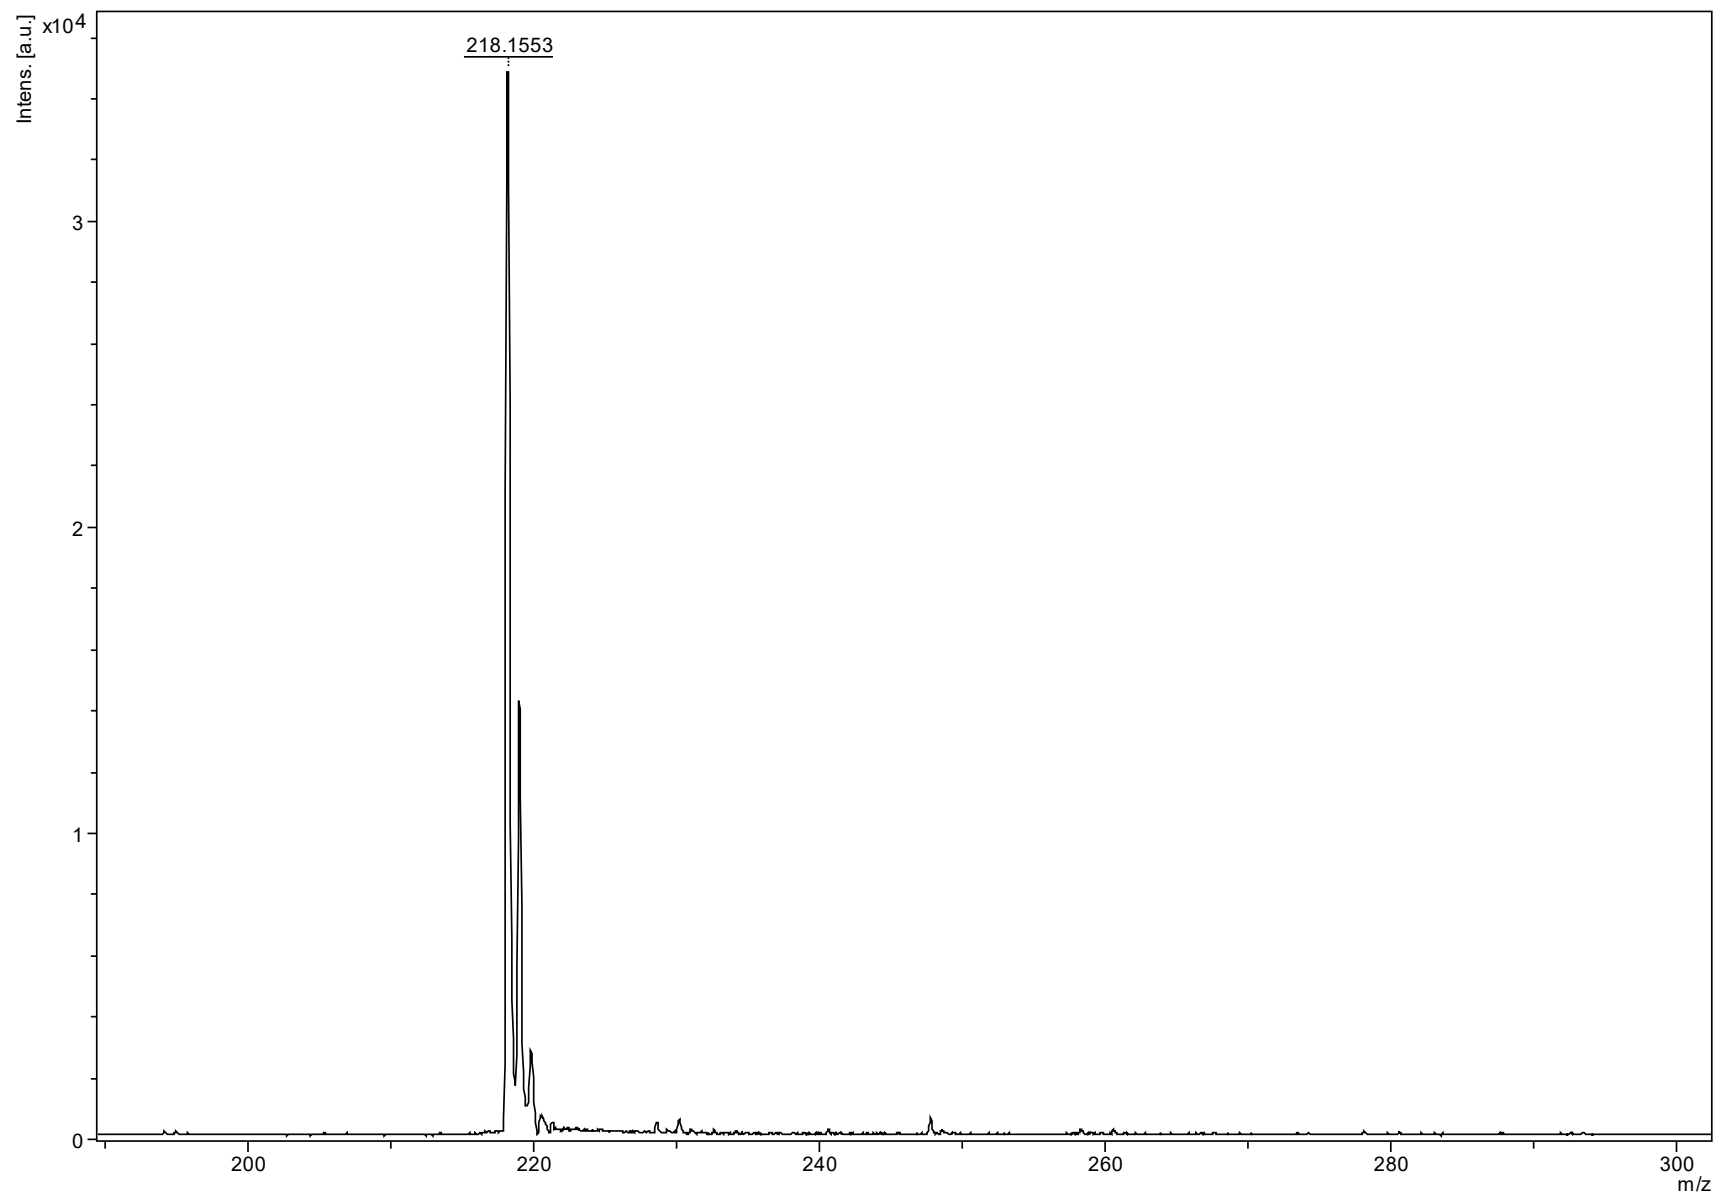

# <sup>1</sup>H NMR spectrum of compound 2a

|                        |        |         |              |                      |                  |
|------------------------|--------|---------|--------------|----------------------|------------------|
| Acquisition Time (sec) | 1.9818 | Comment | single pulse | Date                 |                  |
| Date Stamp             |        |         |              |                      |                  |
| File Name              |        |         |              |                      |                  |
| Frequency (MHz)        | 600.17 | Nucleus | 1H           | Number of Transients | 4                |
| Original Points Count  | 32768  | Owner   | CKP          | Points Count         | 32768            |
| Receiver Gain          | 26.00  | Solvent | CHLOROFORM-d | Spectrum Offset (Hz) | 4521.0088        |
|                        |        |         |              | Origin               | ECA 600          |
|                        |        |         |              | Pulse Sequence       | single_pulse.ex2 |
|                        |        |         |              | Sweep Width (Hz)     | 16534.39         |

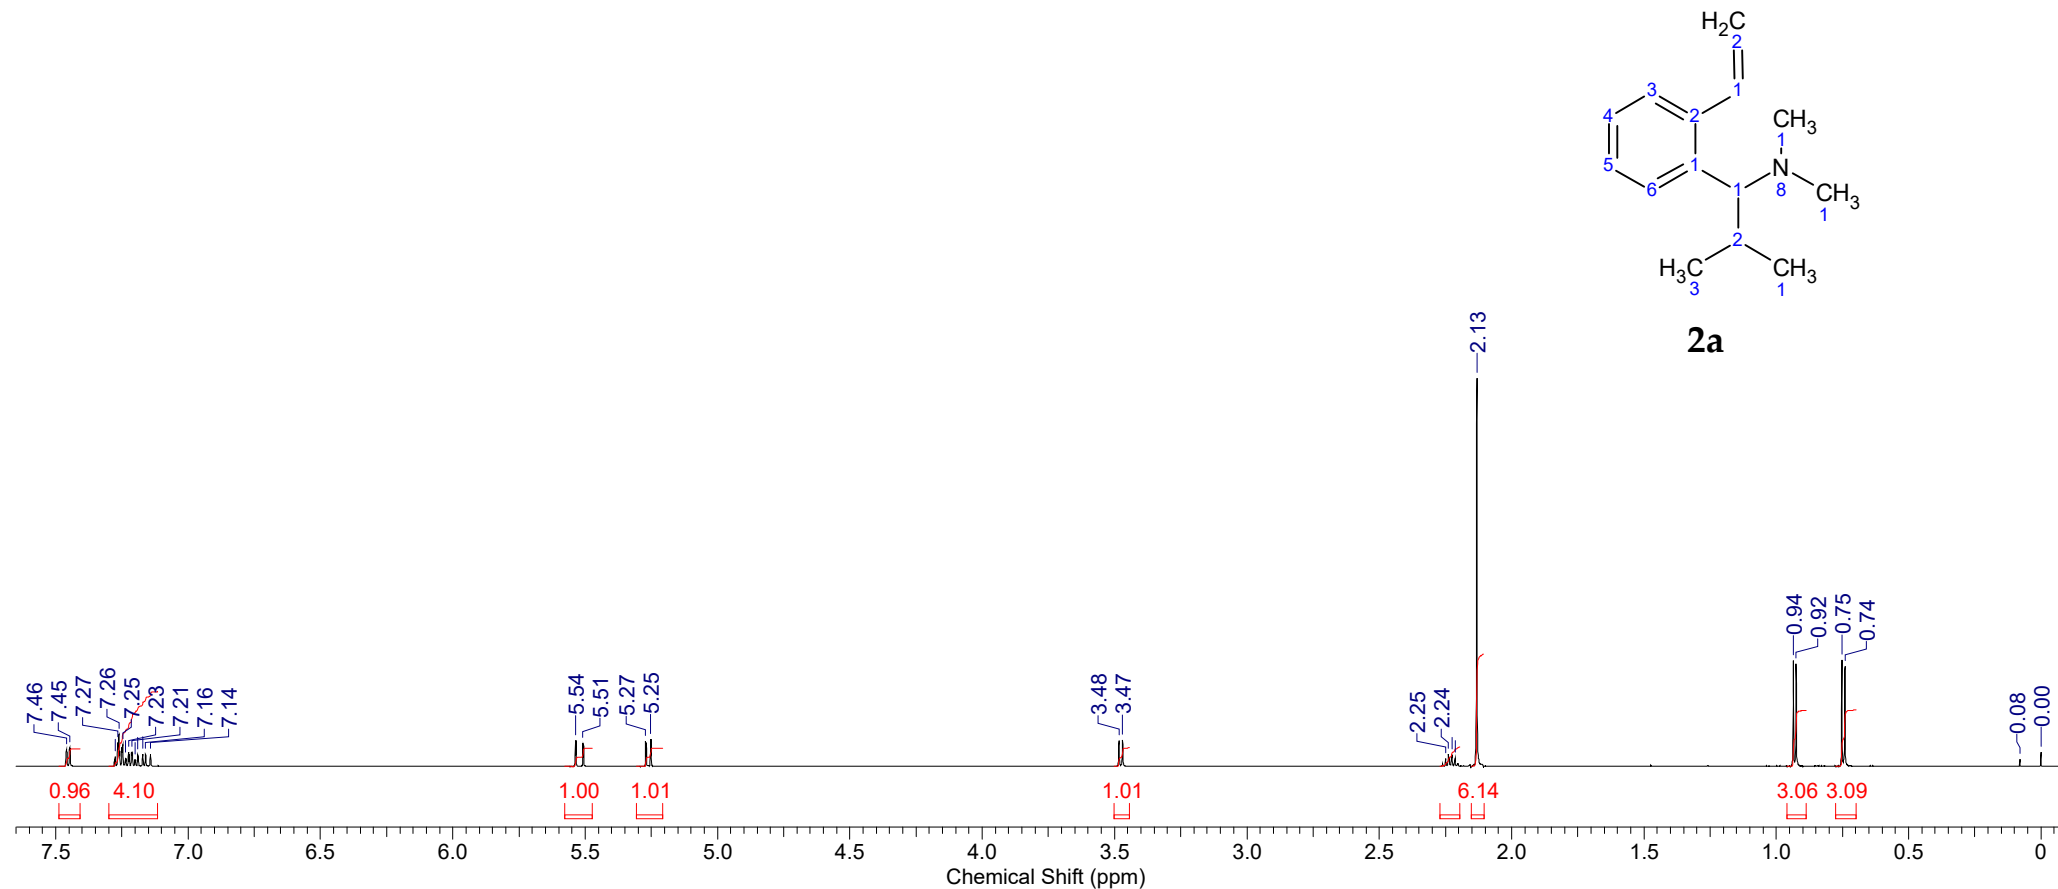



# <sup>1</sup>H NMR spectrum of compound 2a

|                        |        |         |              |                      |                  |
|------------------------|--------|---------|--------------|----------------------|------------------|
| Acquisition Time (sec) | 1.9818 | Comment | single pulse | Date                 |                  |
| Date Stamp             |        |         |              |                      |                  |
| File Name              |        |         |              |                      |                  |
| Frequency (MHz)        | 600.17 | Nucleus | 1H           | Number of Transients | 4                |
| Original Points Count  | 32768  | Owner   | CKP          | Points Count         | 32768            |
| Receiver Gain          | 26.00  | Solvent | CHLOROFORM-d | Spectrum Offset (Hz) | 4521.0088        |
|                        |        |         |              | Origin               | ECA 600          |
|                        |        |         |              | Pulse Sequence       | single_pulse.ex2 |
|                        |        |         |              | Sweep Width (Hz)     | 16534.39         |

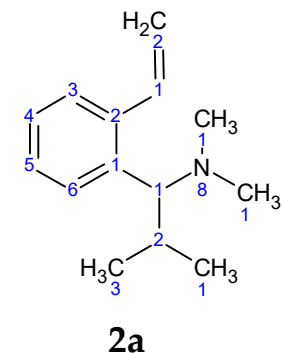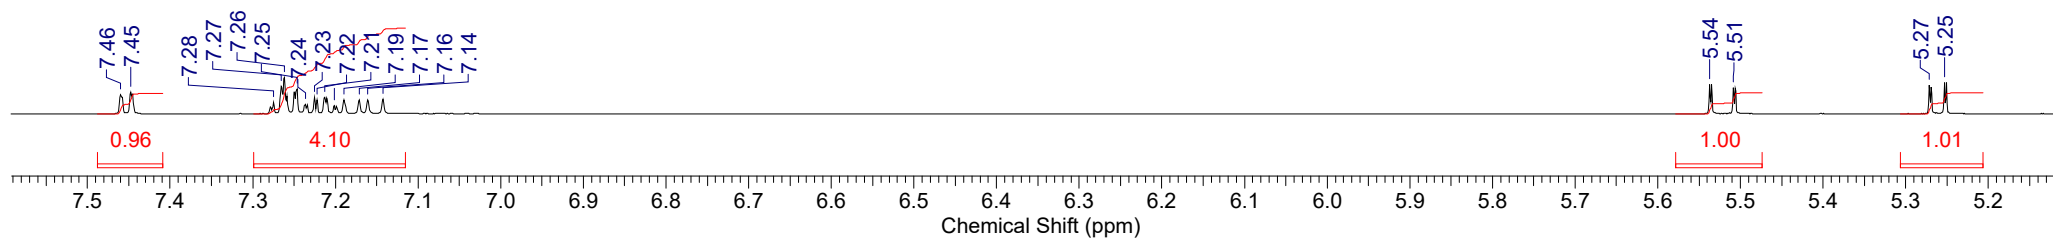

# $^1\text{H}$ NMR spectrum of compound **2a**

|                        |        |         |              |                      |           |                  |                  |
|------------------------|--------|---------|--------------|----------------------|-----------|------------------|------------------|
| Acquisition Time (sec) | 1.9818 | Comment | single pulse | Date                 |           |                  |                  |
| Date Stamp             |        |         |              |                      |           |                  |                  |
| File Name              |        |         |              |                      |           |                  |                  |
| Frequency (MHz)        | 600.17 | Nucleus | 1H           | Number of Transients | 4         | Origin           | ECA 600          |
| Original Points Count  | 32768  | Owner   | CKP          | Points Count         | 32768     | Pulse Sequence   | single_pulse.ex2 |
| Receiver Gain          | 26.00  | Solvent | CHLOROFORM-d | Spectrum Offset (Hz) | 4521.0088 | Sweep Width (Hz) | 16534.39         |

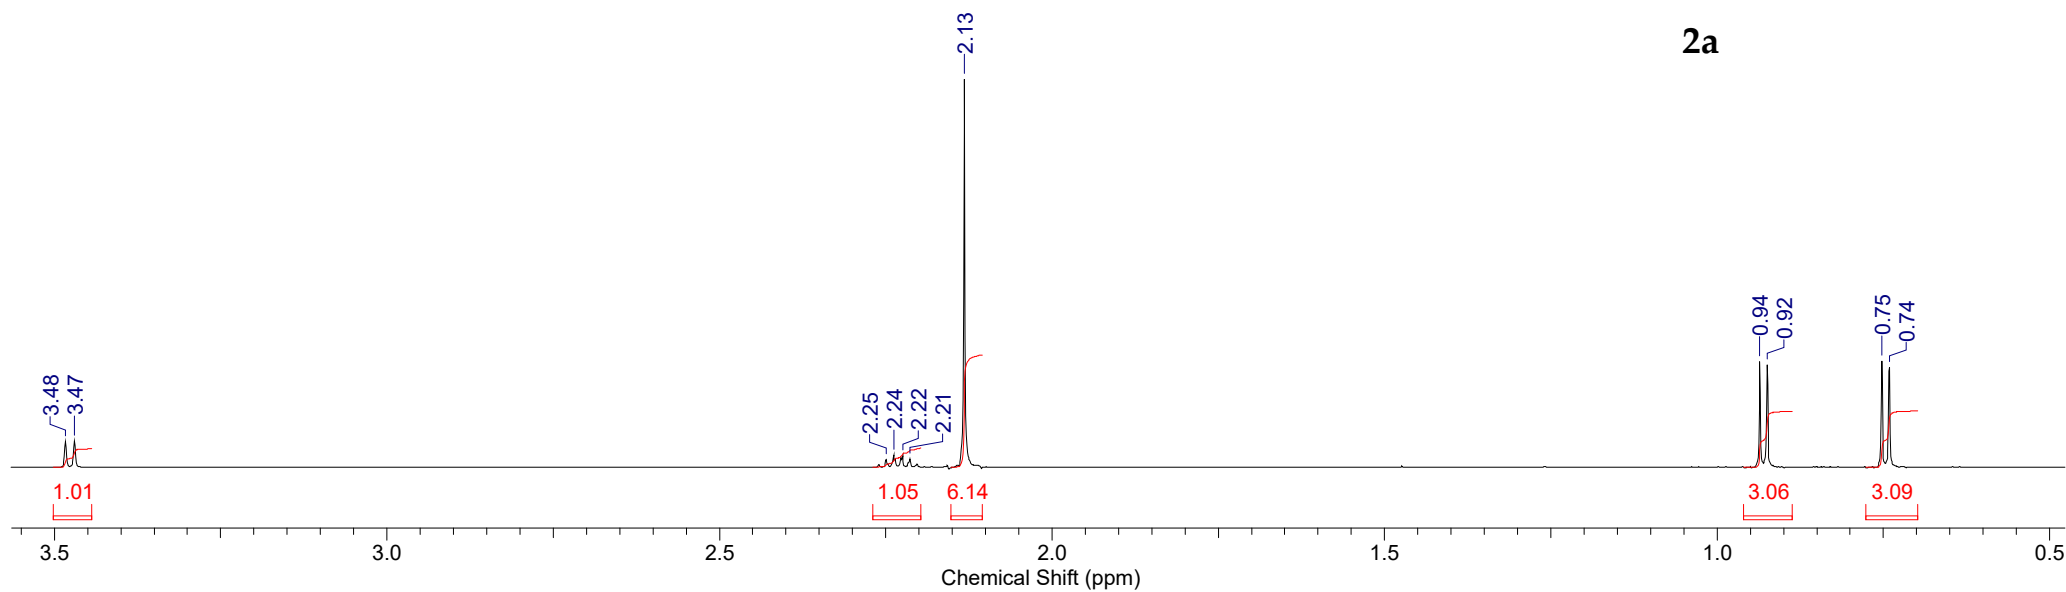

# $^{13}\text{C}$ NMR spectrum of compound 2a

|                                      |              |                                                 |            |                         |                  |
|--------------------------------------|--------------|-------------------------------------------------|------------|-------------------------|------------------|
| <b>Acquisition Time (sec)</b> 0.6921 |              | <b>Comment</b> single pulse decoupled gated NOE |            | <b>Date</b>             |                  |
| <b>Date Stamp</b>                    |              |                                                 |            |                         |                  |
| <b>File Name</b>                     |              |                                                 |            | <b>Frequency (MHz)</b>  | 150.91           |
| <b>Nucleus</b>                       | 13C          | <b>Number of Transients</b>                     | 1000       | <b>Origin</b>           | ECA 600          |
|                                      |              | <b>Original Points Count</b>                    | 32768      |                         |                  |
| <b>Owner</b>                         | CKP          | <b>Points Count</b>                             | 32768      | <b>Pulse Sequence</b>   | single_pulse_dec |
|                                      |              | <b>Receiver Gain</b>                            | 54.00      |                         |                  |
| <b>Solvent</b>                       | CHLOROFORM-d | <b>Spectrum Offset (Hz)</b>                     | 15076.4629 | <b>Sweep Width (Hz)</b> | 47348.49         |

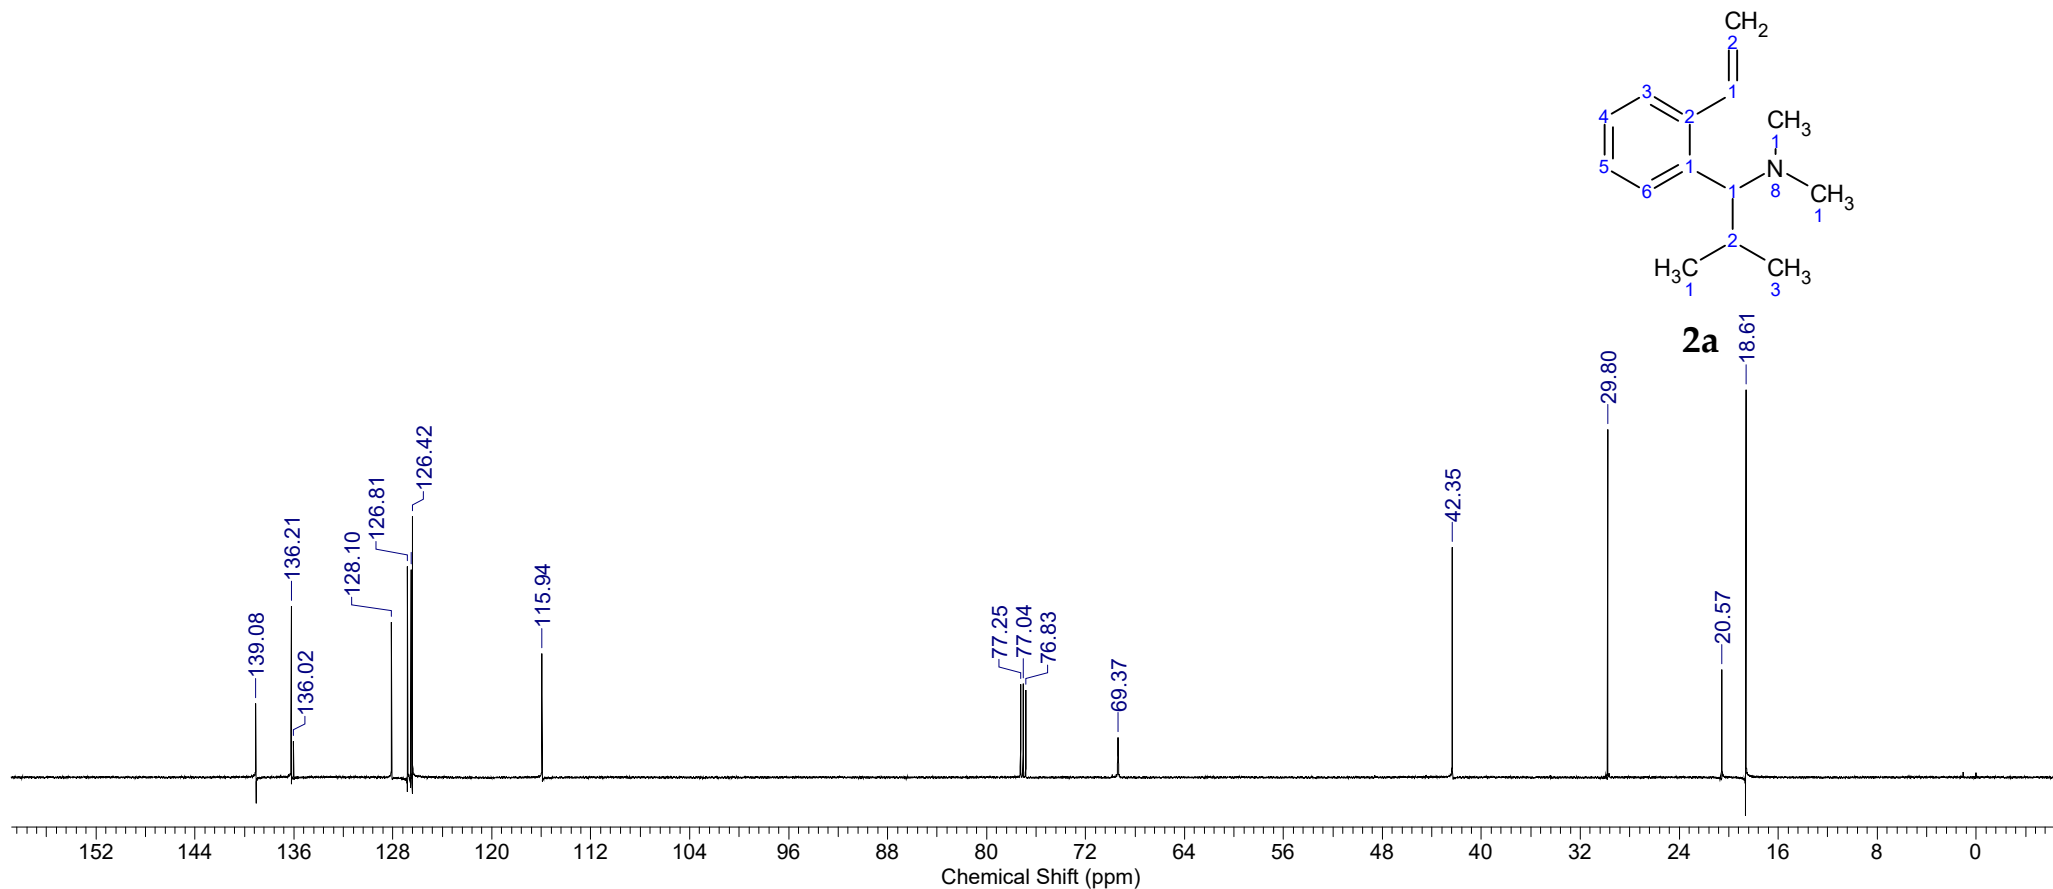

# $^{13}\text{C}$ NMR spectrum of compound 2a

|                                      |              |                                                 |            |                         |                        |                                    |
|--------------------------------------|--------------|-------------------------------------------------|------------|-------------------------|------------------------|------------------------------------|
| <b>Acquisition Time (sec)</b> 0.6921 |              | <b>Comment</b> single pulse decoupled gated NOE |            |                         | <b>Date</b>            |                                    |
| <b>Date Stamp</b>                    |              |                                                 |            |                         |                        |                                    |
| <b>File Name</b>                     |              |                                                 |            |                         | <b>Frequency (MHz)</b> | 150.91                             |
| <b>Nucleus</b>                       | 13C          | <b>Number of Transients</b>                     | 1000       | <b>Origin</b>           | ECA 600                | <b>Original Points Count</b> 32768 |
| <b>Owner</b>                         | CKP          | <b>Points Count</b>                             | 32768      | <b>Pulse Sequence</b>   | single_pulse_dec       | <b>Receiver Gain</b> 54.00         |
| <b>Solvent</b>                       | CHLOROFORM-d | <b>Spectrum Offset (Hz)</b>                     | 15076.4629 | <b>Sweep Width (Hz)</b> | 47348.49               |                                    |

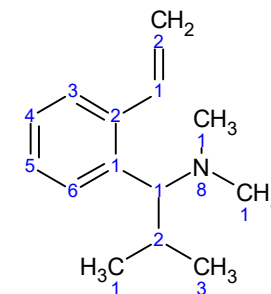

2a

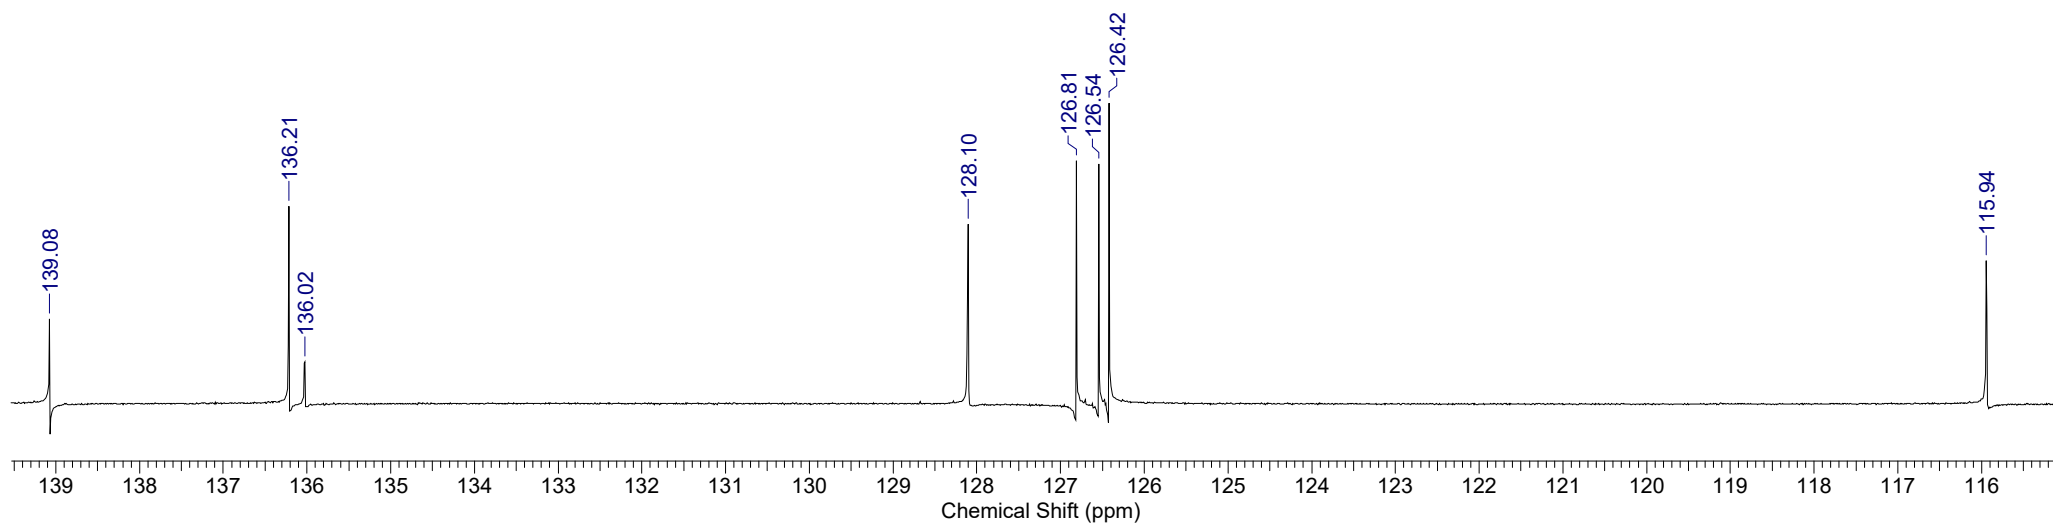

# $^{13}\text{C}$ NMR spectrum of compound **2a**

|                        |                 |                      |                                  |                  |                  |
|------------------------|-----------------|----------------------|----------------------------------|------------------|------------------|
| Acquisition Time (sec) | 0.6921          | Comment              | single pulse decoupled gated NOE |                  | Date             |
| Date Stamp             |                 |                      |                                  |                  |                  |
| File Name              |                 |                      | Frequency (MHz)                  |                  |                  |
| Nucleus                | $^{13}\text{C}$ | Number of Transients | 1000                             | Origin           | ECA 600          |
| Owner                  | CKP             | Points Count         | 32768                            | Pulse Sequence   | single pulse dec |
| Solvent                | CHLOROFORM-d    | Spectrum Offset (Hz) | 15076.4629                       | Sweep Width (Hz) | 47348.49         |
|                        |                 |                      | Original Points Count            | 32768            |                  |
|                        |                 |                      | Receiver Gain                    | 54.00            |                  |

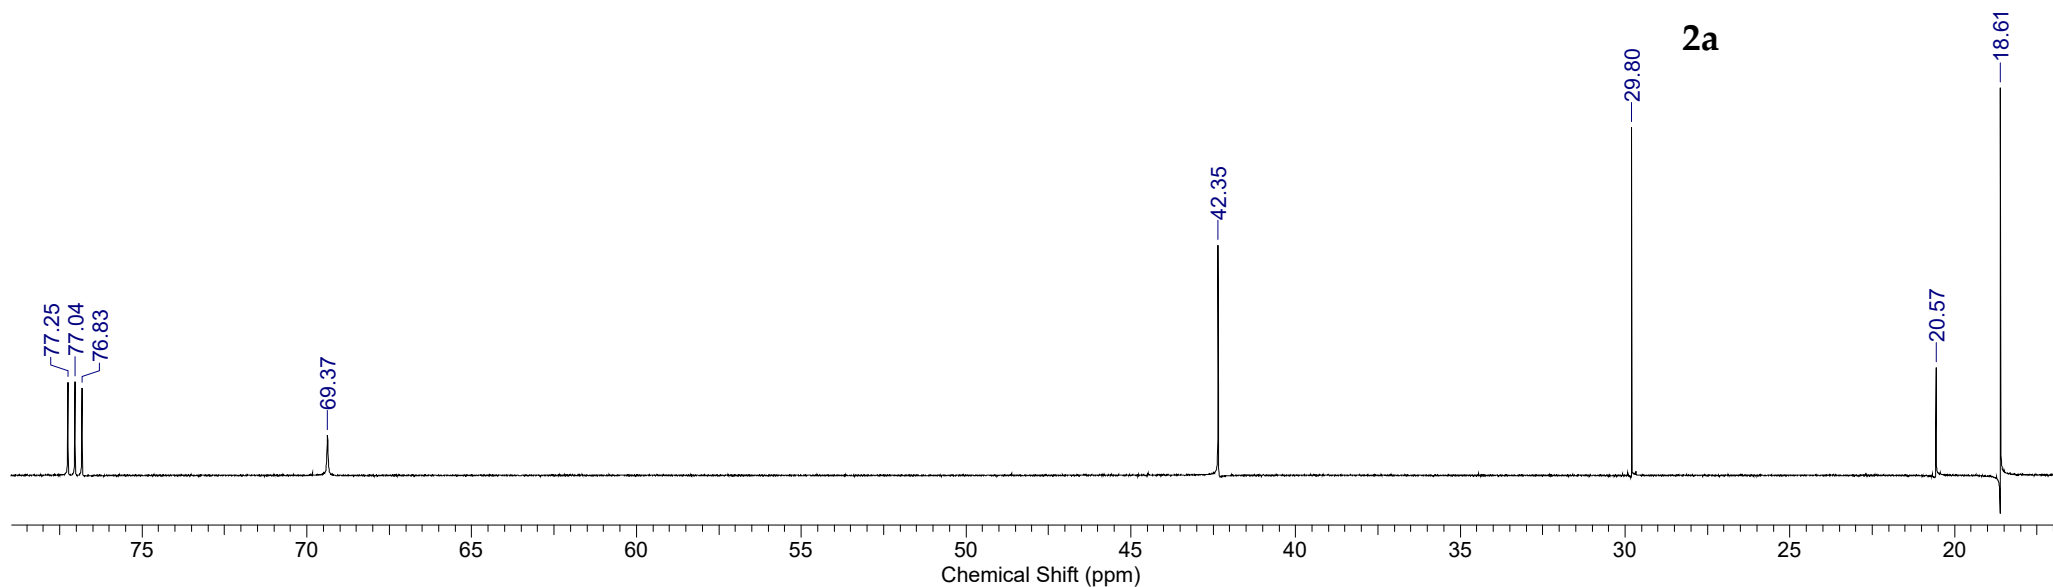

# HRMS (MALDI-TOF) spectrum of compound **2a**

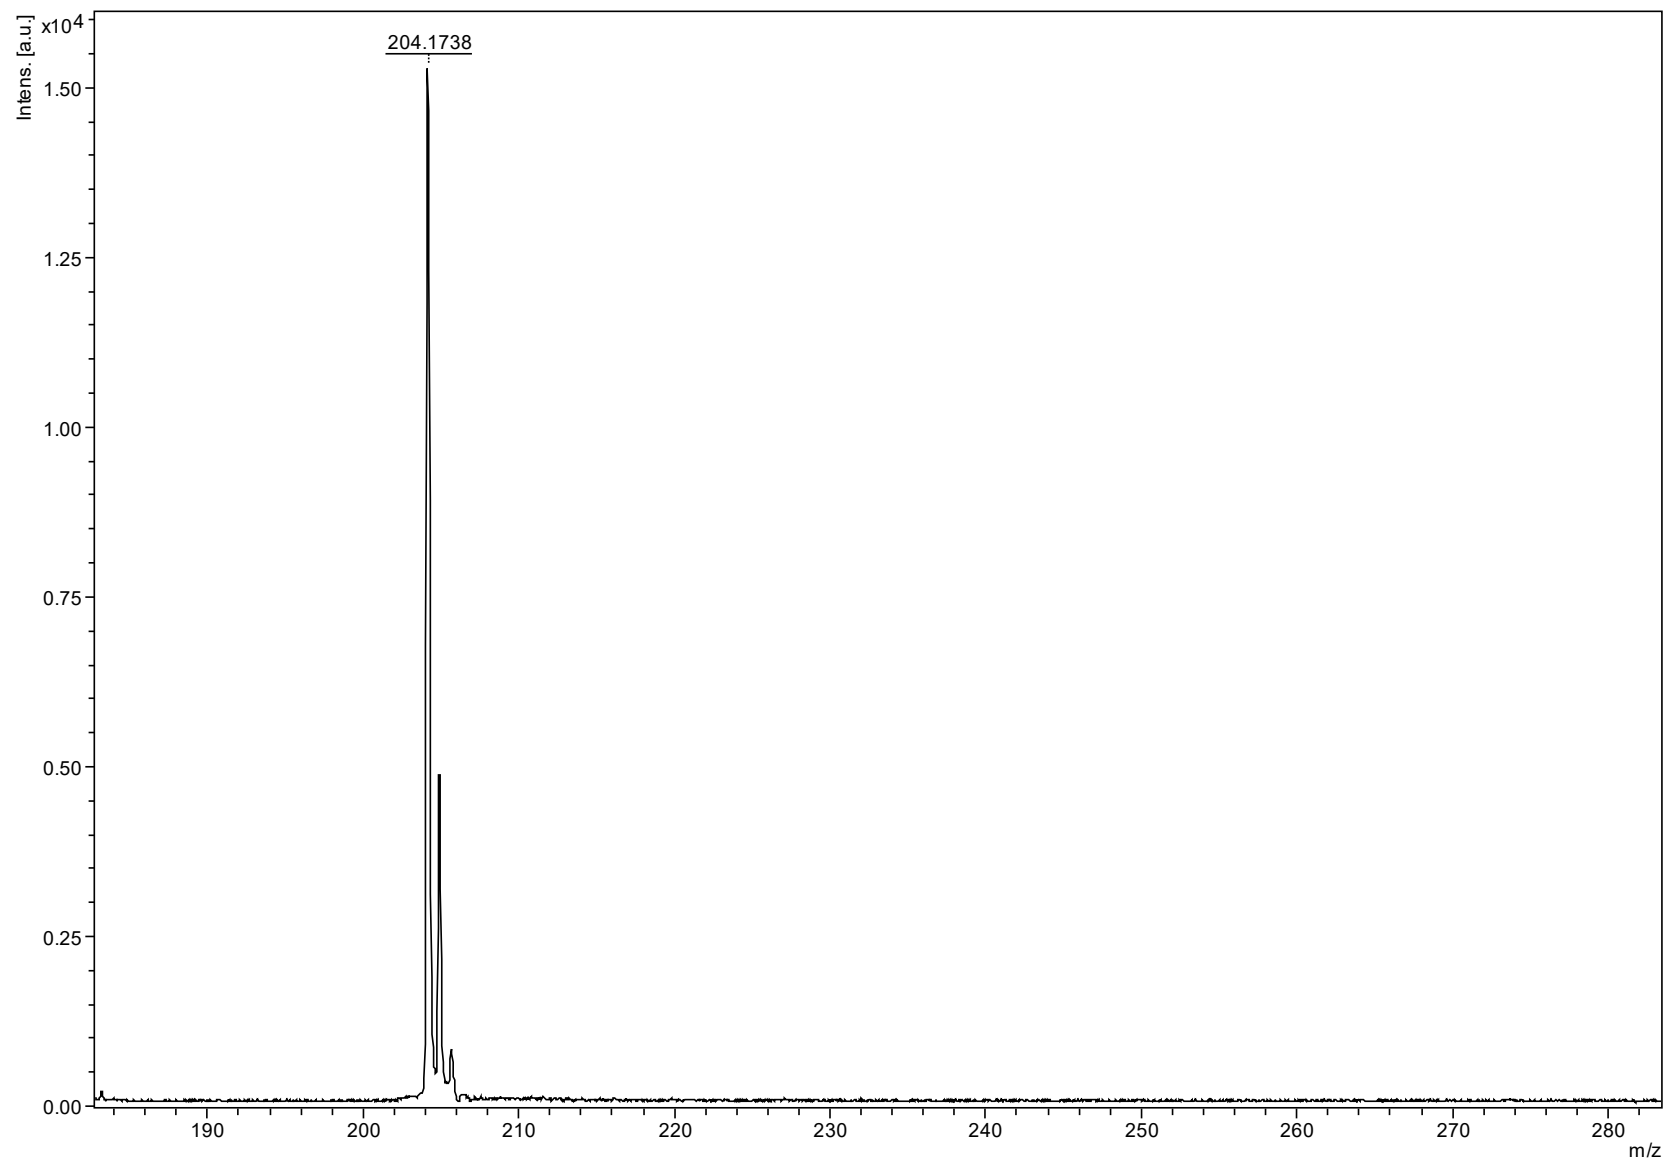

# <sup>1</sup>H NMR spectrum of compound **2b**

|                        |        |         |              |                      |                  |
|------------------------|--------|---------|--------------|----------------------|------------------|
| Acquisition Time (sec) | 1.9818 | Comment | single_pulse | Date                 |                  |
| Date Stamp             |        |         |              |                      |                  |
| File Name              |        |         |              |                      |                  |
| Frequency (MHz)        | 600.17 | Nucleus | 1H           | Number of Transients | 8                |
| Original Points Count  | 32768  | Owner   | CKP          | Points Count         | 32768            |
| Receiver Gain          | 24.00  | Solvent | CHLOROFORM-d | Spectrum Offset (Hz) | 5390.9478        |
|                        |        |         |              | Origin               | ECA 600          |
|                        |        |         |              | Pulse Sequence       | single_pulse.ex2 |
|                        |        |         |              | Sweep Width (Hz)     | 16534.39         |

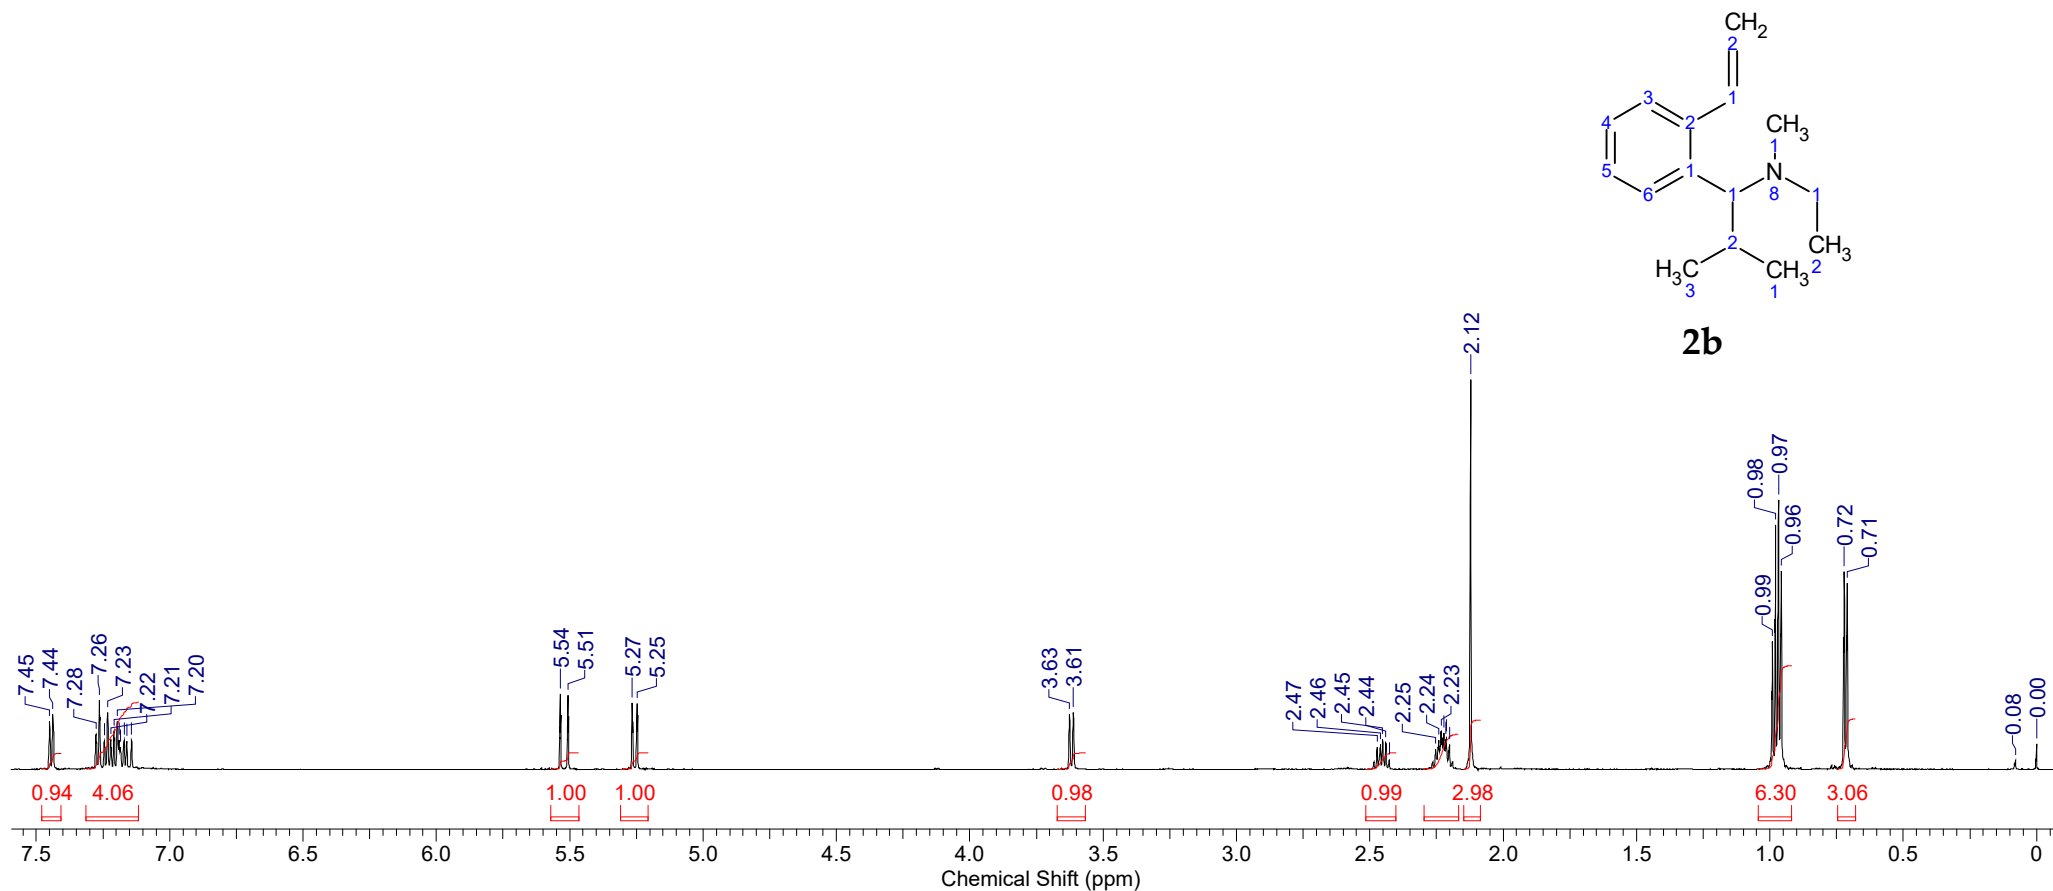

# $^1\text{H}$ NMR spectrum of compound **2b**

|                        |        |         |              |                      |           |
|------------------------|--------|---------|--------------|----------------------|-----------|
| Acquisition Time (sec) | 1.9818 | Comment | single pulse | Date                 |           |
| Date Stamp             |        |         |              |                      |           |
| File Name              |        |         |              |                      |           |
| Frequency (MHz)        | 600.17 | Nucleus | $^1\text{H}$ | Number of Transients | 8         |
| Original Points Count  | 32768  | Owner   | CKP          | Points Count         | 32768     |
| Receiver Gain          | 24.00  | Solvent | CHLOROFORM-d | Spectrum Offset (Hz) | 5390.9478 |
|                        |        |         |              | Sweep Width (Hz)     | 16534.39  |

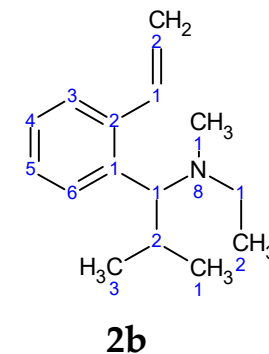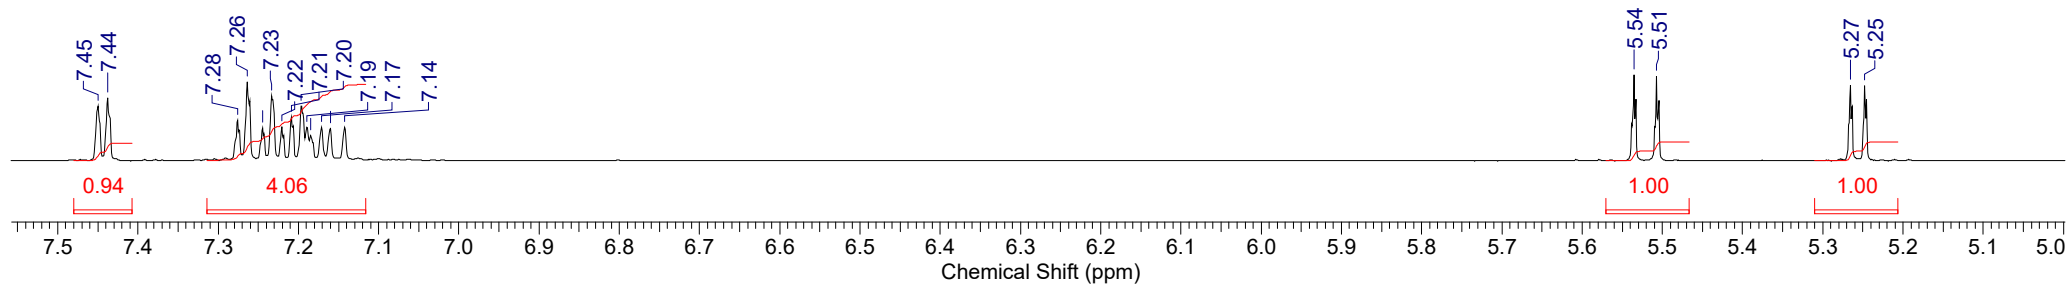



# $^1\text{H}$ NMR spectrum of compound **2b**

|                        |        |         |              |                      |           |
|------------------------|--------|---------|--------------|----------------------|-----------|
| Acquisition Time (sec) | 1.9818 | Comment | single_pulse | Date                 |           |
| Date Stamp             |        |         |              |                      |           |
| File Name              |        |         |              |                      |           |
| Frequency (MHz)        | 600.17 | Nucleus | $^1\text{H}$ | Number of Transients | 8         |
| Original Points Count  | 32768  | Owner   | CKP          | Points Count         | 32768     |
| Receiver Gain          | 24.00  | Solvent | CHLOROFORM-d | Spectrum Offset (Hz) | 5390.9478 |
|                        |        |         |              | Sweep Width (Hz)     | 16534.39  |

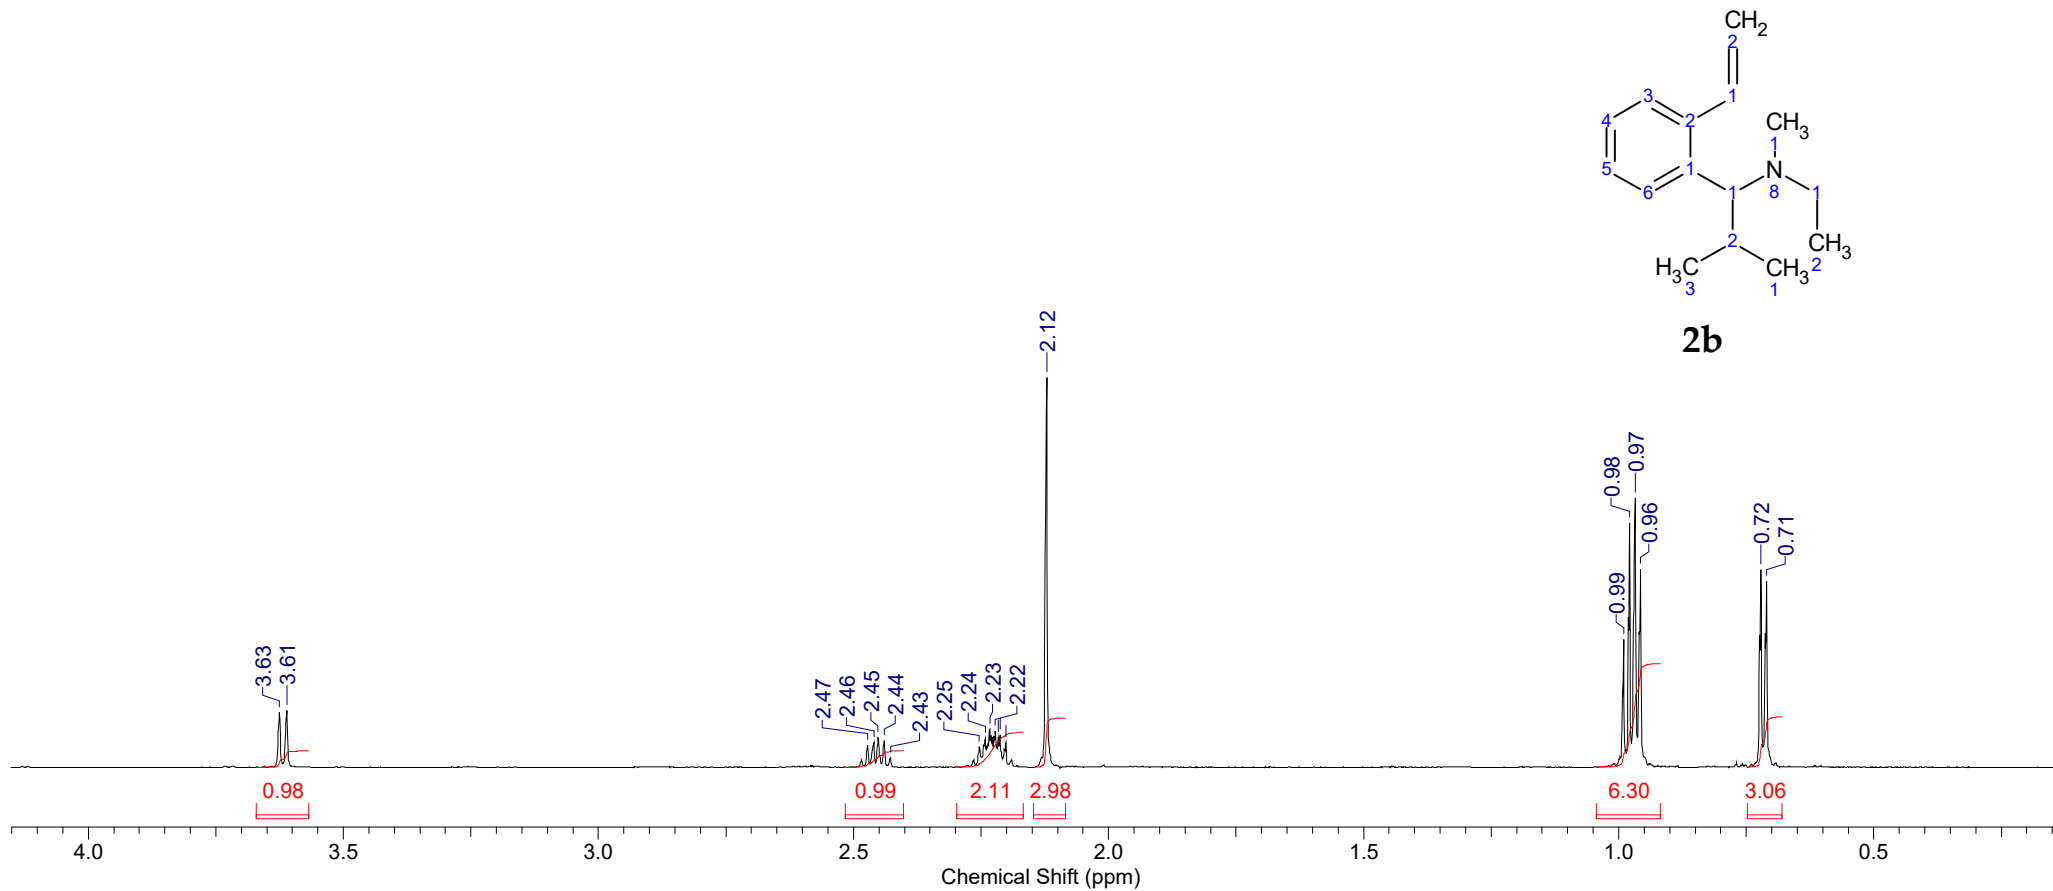

# $^{13}\text{C}$ NMR spectrum of compound **2b**

|                        |        |         |                                  |                      |            |                  |                  |
|------------------------|--------|---------|----------------------------------|----------------------|------------|------------------|------------------|
| Acquisition Time (sec) | 0.6921 | Comment | single pulse decoupled gated NOE |                      | Date       |                  |                  |
| Date Stamp             |        |         |                                  |                      |            |                  |                  |
| File Name              |        |         |                                  |                      |            |                  |                  |
| Frequency (MHz)        | 150.91 | Nucleus | 13C                              | Number of Transients | 800        | Origin           | ECA 600          |
| Original Points Count  | 32768  | Owner   | CKP                              | Points Count         | 32768      | Pulse Sequence   | single pulse dec |
| Receiver Gain          | 54.00  | Solvent | CHLOROFORM-d                     | Spectrum Offset (Hz) | 15075.0176 | Sweep Width (Hz) | 47348.49         |

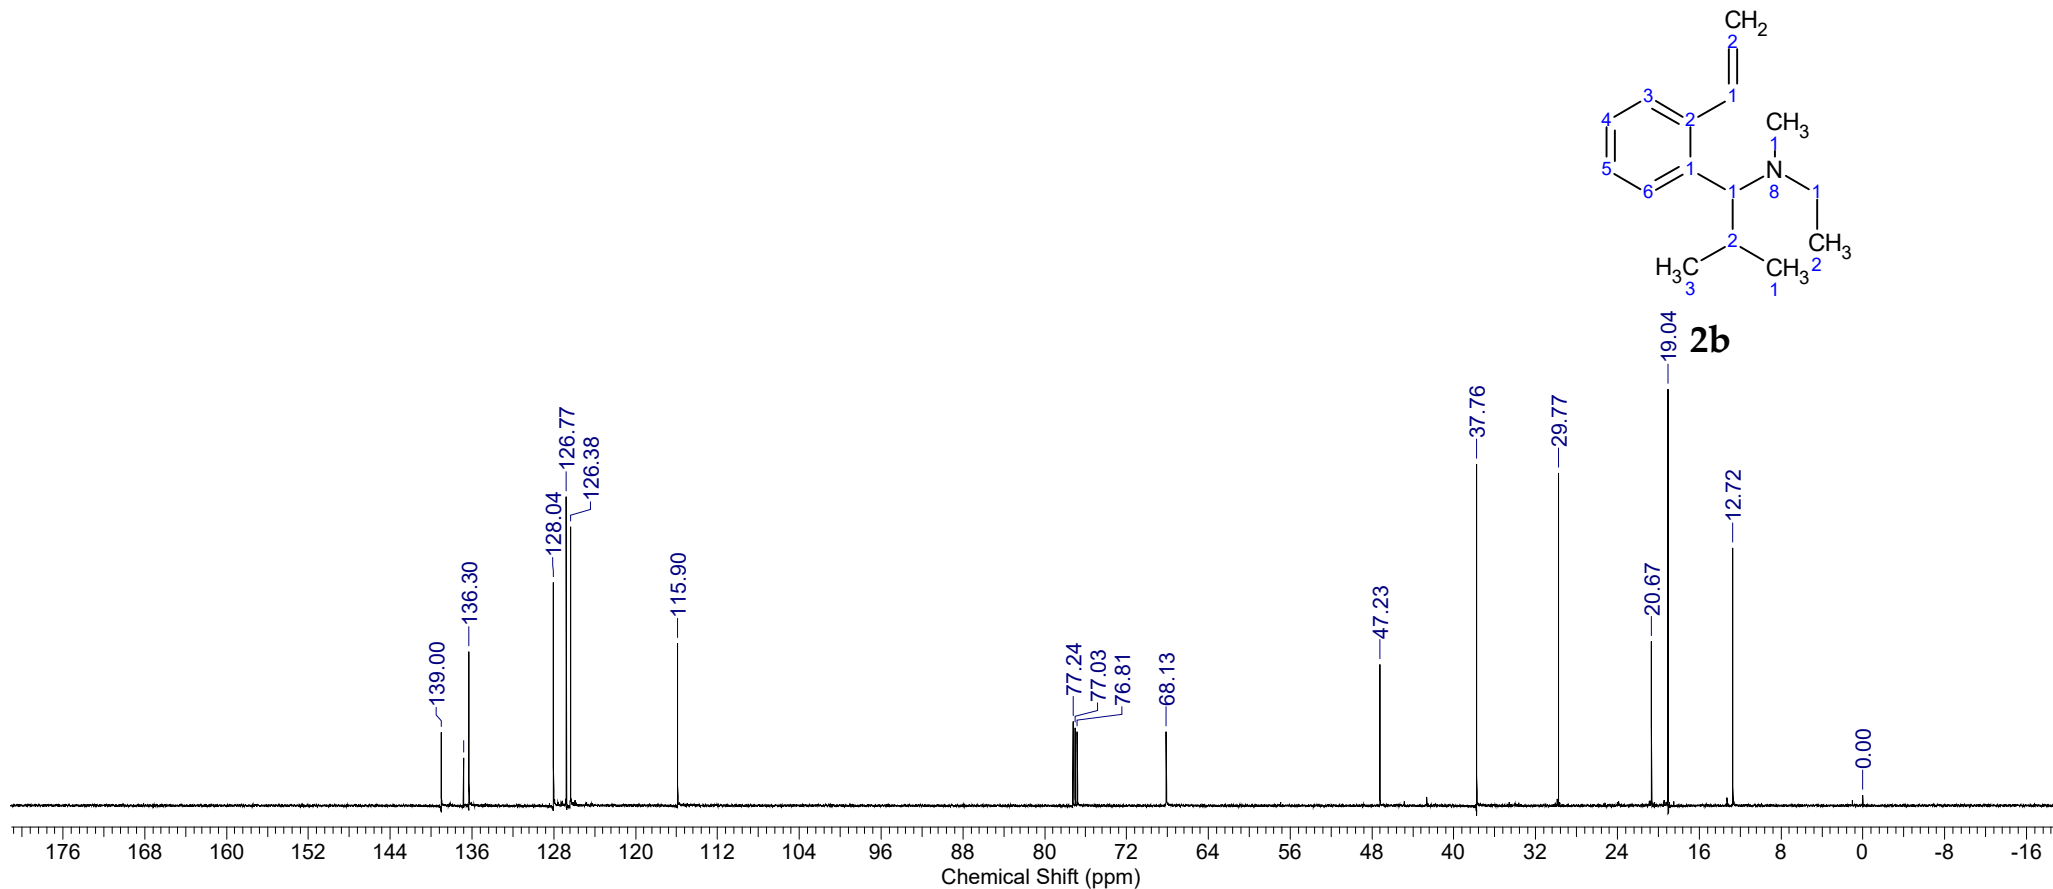

# $^{13}\text{C}$ NMR spectrum of compound **2b**

|                        |        |         |                                  |                      |            |                  |                  |
|------------------------|--------|---------|----------------------------------|----------------------|------------|------------------|------------------|
| Acquisition Time (sec) | 0.6921 | Comment | single pulse decoupled gated NOE |                      | Date       |                  |                  |
| Date Stamp             |        |         |                                  |                      |            |                  |                  |
| File Name              |        |         |                                  |                      |            |                  |                  |
| Frequency (MHz)        | 150.91 | Nucleus | 13C                              | Number of Transients | 800        | Origin           | ECA 600          |
| Original Points Count  | 32768  | Owner   | CKP                              | Points Count         | 32768      | Pulse Sequence   | single pulse dec |
| Receiver Gain          | 54.00  | Solvent | CHLOROFORM-d                     | Spectrum Offset (Hz) | 15075.0176 | Sweep Width (Hz) | 47348.49         |

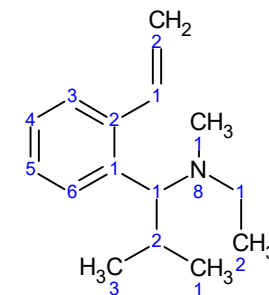

**2b**

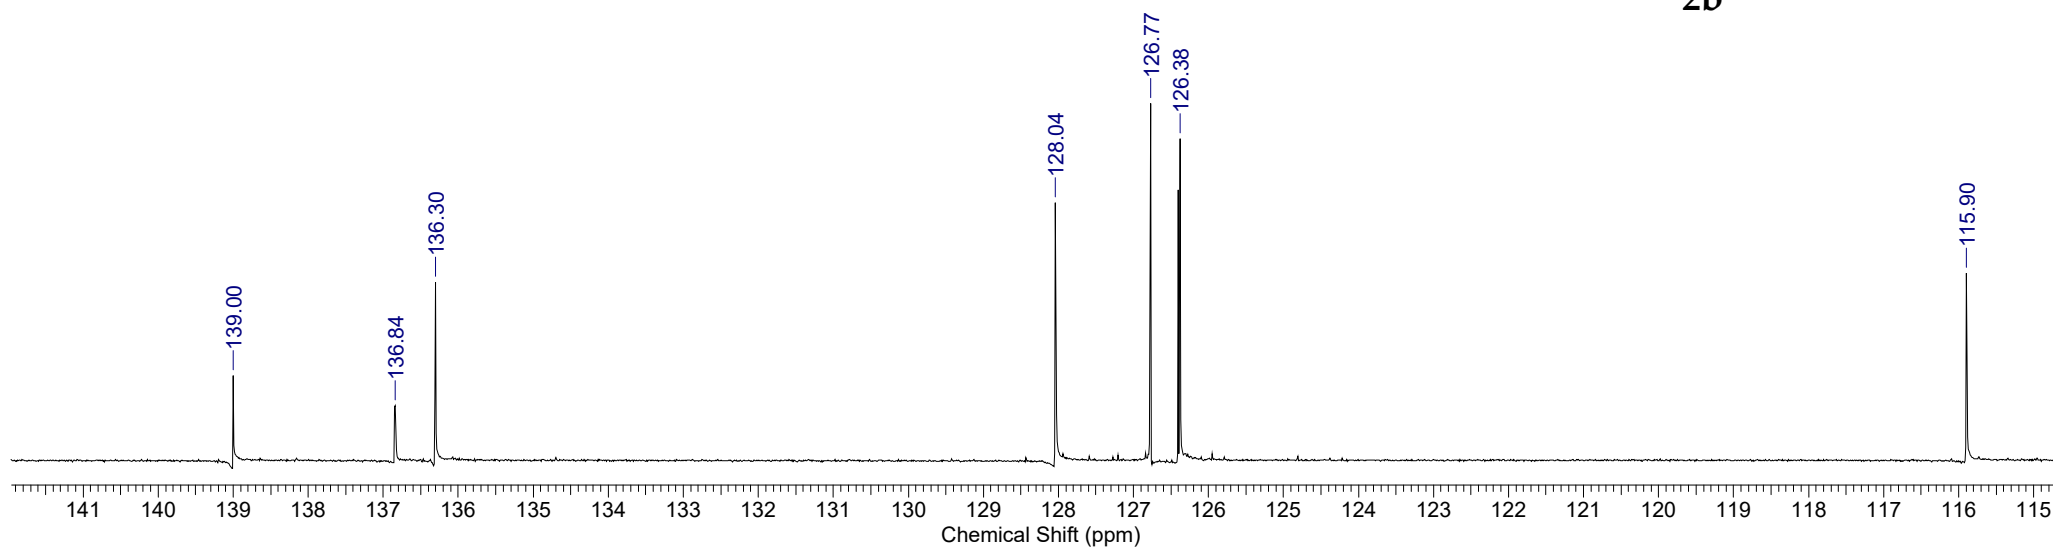

# $^{13}\text{C}$ NMR spectrum of compound **2b**

|                               |        |                |                                  |                             |             |                                           |
|-------------------------------|--------|----------------|----------------------------------|-----------------------------|-------------|-------------------------------------------|
| <b>Acquisition Time (sec)</b> | 0.6921 | <b>Comment</b> | single pulse decoupled gated NOE |                             | <b>Date</b> |                                           |
| <b>Date Stamp</b>             |        |                |                                  |                             |             |                                           |
| <b>File Name</b>              |        |                |                                  |                             |             |                                           |
| <b>Frequency (MHz)</b>        | 150.91 | <b>Nucleus</b> | 13C                              | <b>Number of Transients</b> | 800         | <b>Origin</b><br>ECA 600                  |
| <b>Original Points Count</b>  | 32768  | <b>Owner</b>   | CKP                              | <b>Points Count</b>         | 32768       | <b>Pulse Sequence</b><br>single pulse dec |
| <b>Receiver Gain</b>          | 54.00  | <b>Solvent</b> | CHLOROFORM-d                     | <b>Spectrum Offset (Hz)</b> | 15075.0176  | <b>Sweep Width (Hz)</b><br>47348.49       |



**2b**

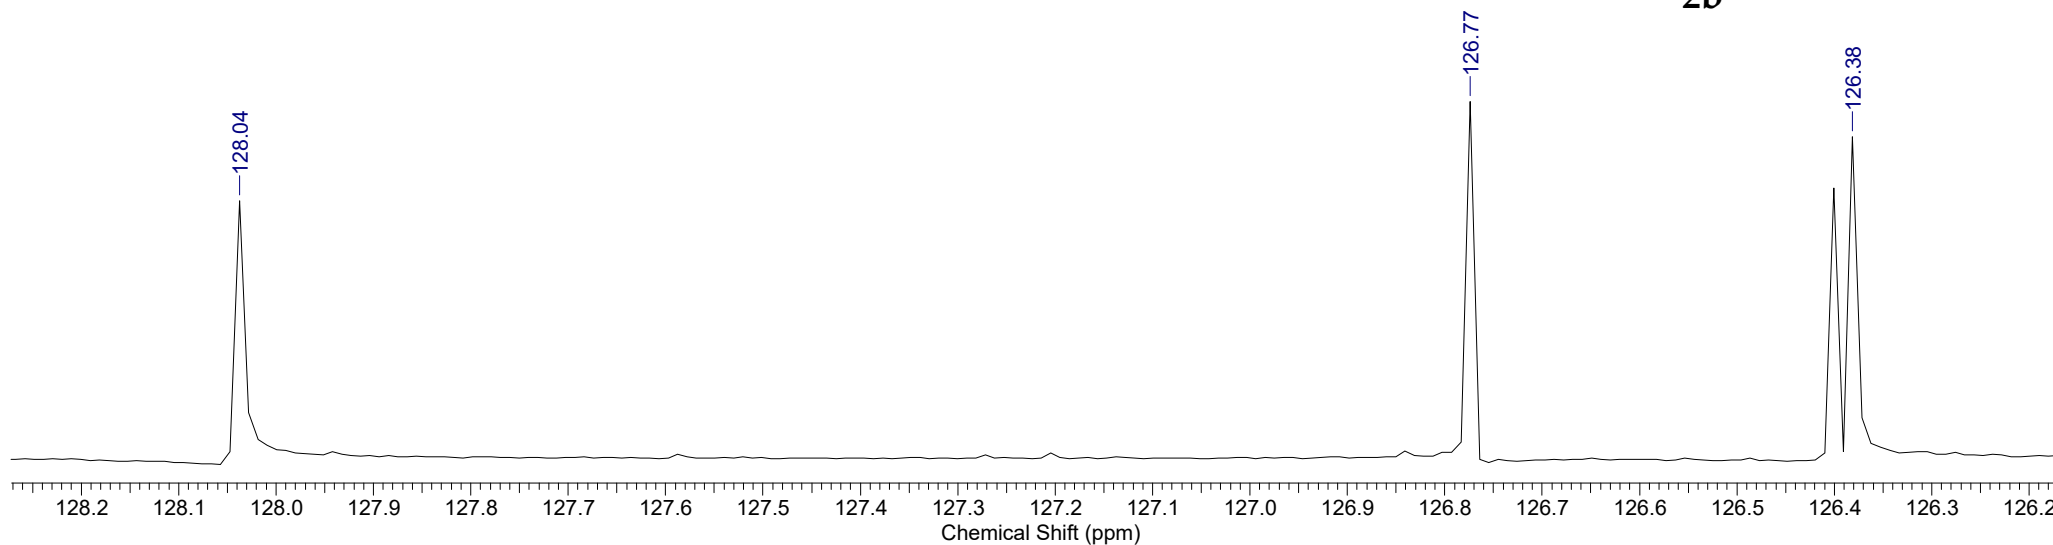

# $^{13}\text{C}$ NMR spectrum of compound **2b**

|                        |        |         |                                  |                      |            |                  |                  |
|------------------------|--------|---------|----------------------------------|----------------------|------------|------------------|------------------|
| Acquisition Time (sec) | 0.6921 | Comment | single pulse decoupled gated NOE |                      | Date       |                  |                  |
| Date Stamp             |        |         |                                  |                      |            |                  |                  |
| File Name              |        |         |                                  |                      |            |                  |                  |
| Frequency (MHz)        | 150.91 | Nucleus | 13C                              | Number of Transients | 800        | Origin           | ECA 600          |
| Original Points Count  | 32768  | Owner   | CKP                              | Points Count         | 32768      | Pulse Sequence   | single pulse dec |
| Receiver Gain          | 54.00  | Solvent | CHLOROFORM-d                     | Spectrum Offset (Hz) | 15075.0176 | Sweep Width (Hz) | 47348.49         |

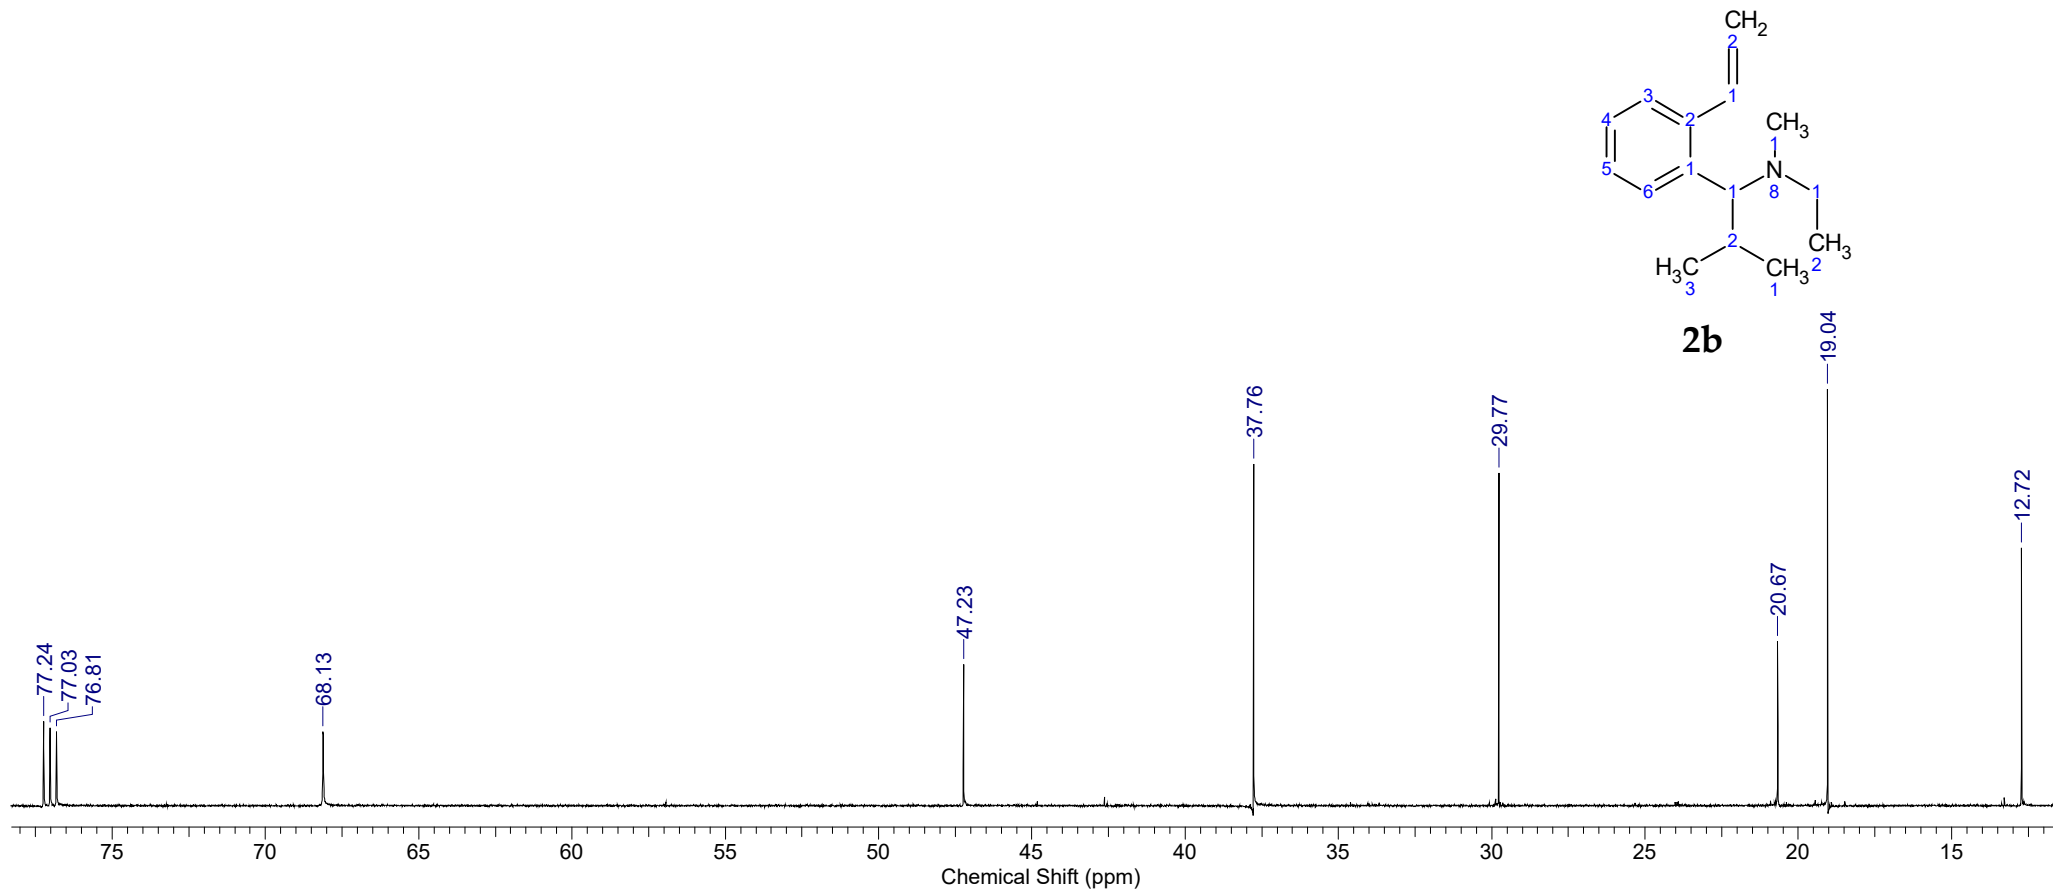

IR spectrum of compound **2b**

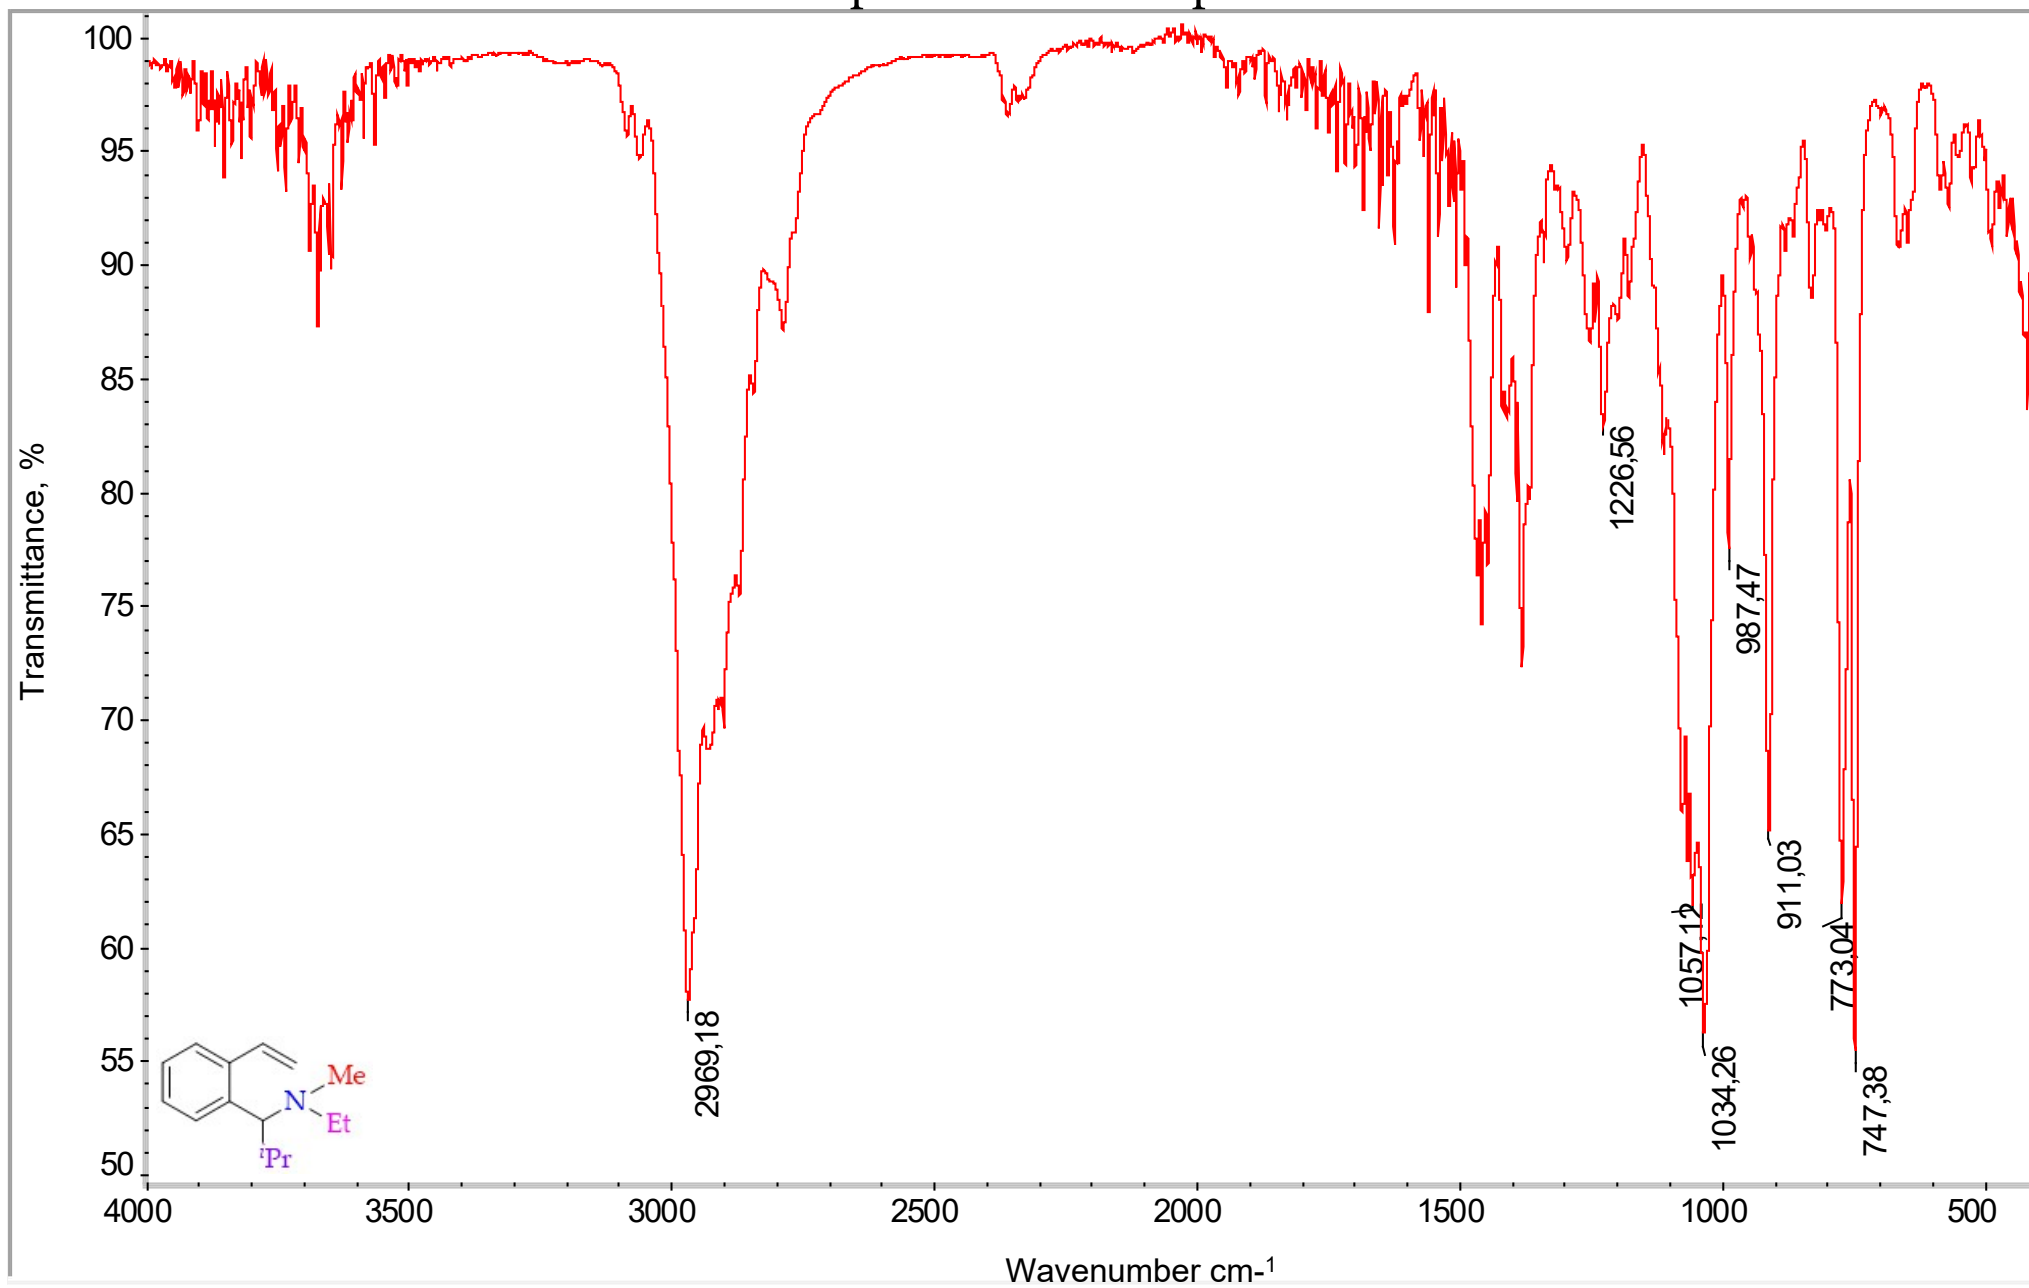

# HRMS (MALDI-TOF) spectrum of compound **2b**

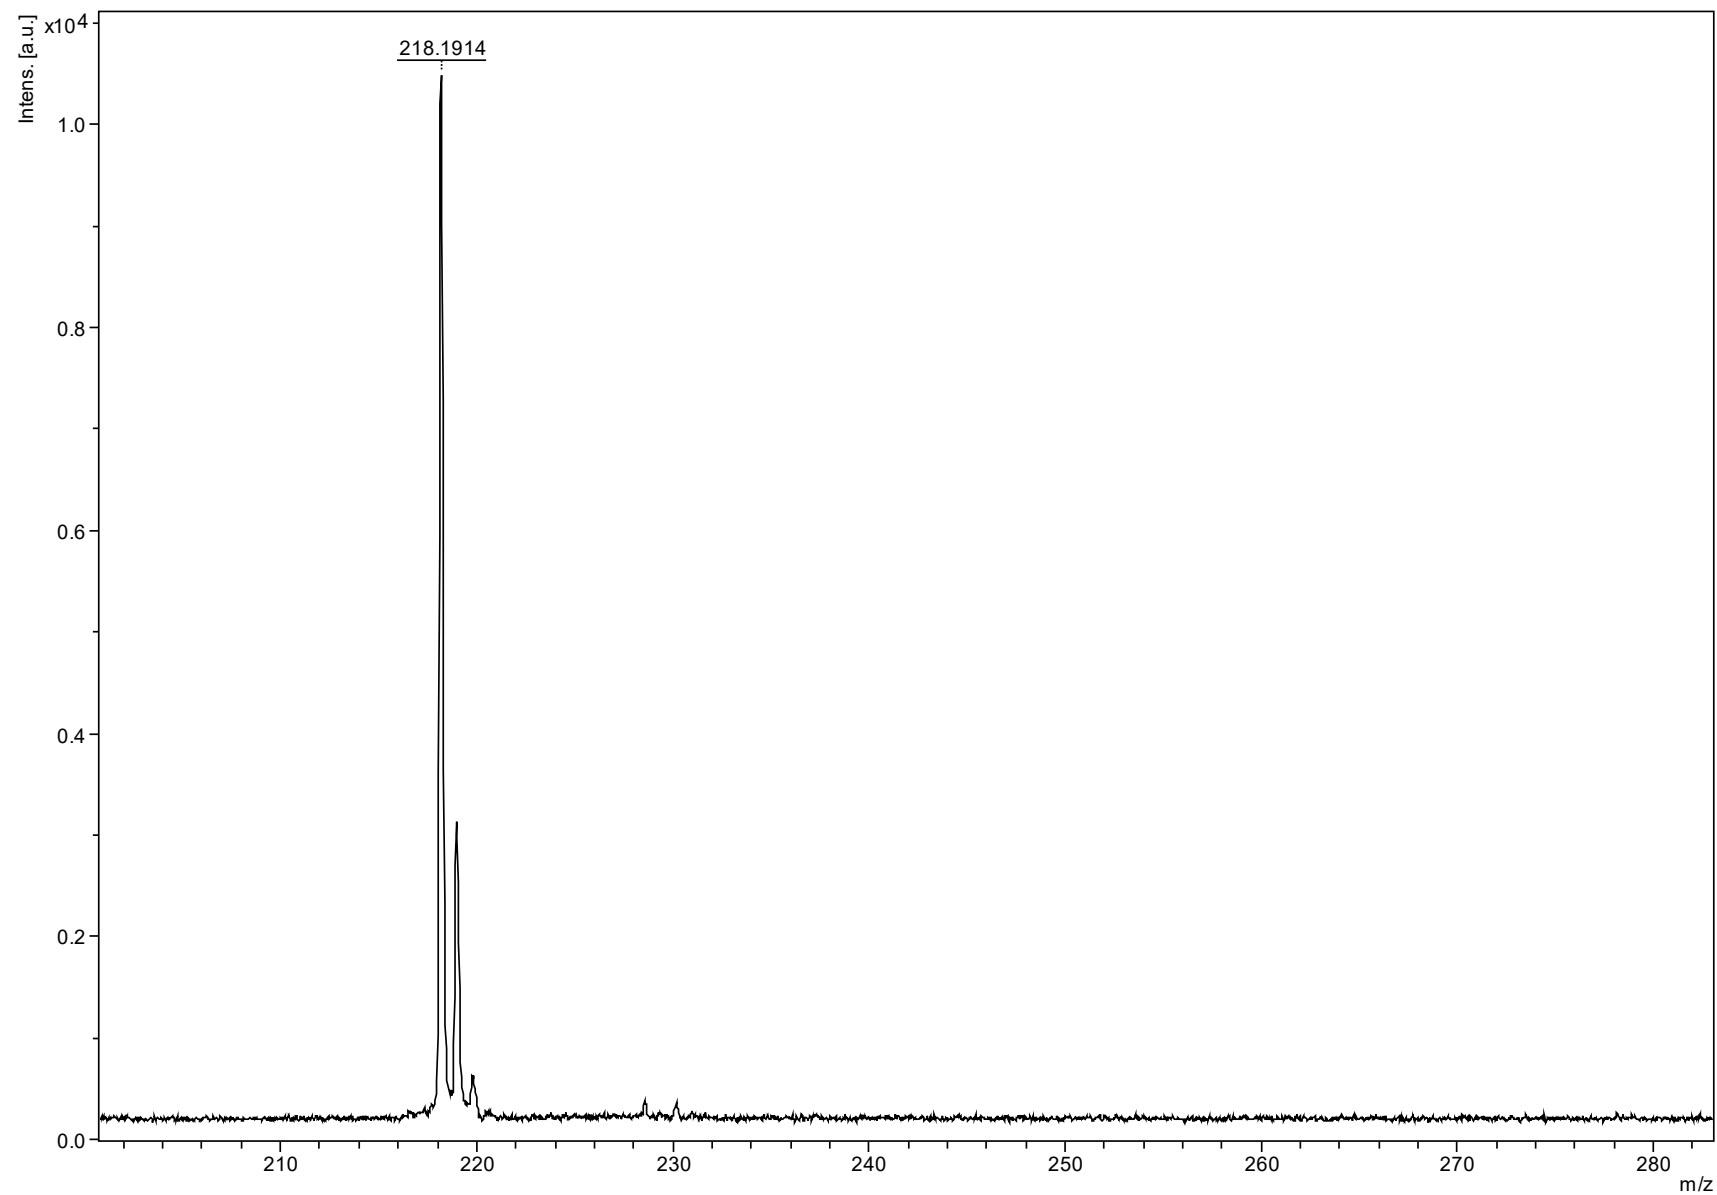

# $^1\text{H}$ NMR spectrum of compound 2c

|                        |           |                   |          |                        |              |                |        |
|------------------------|-----------|-------------------|----------|------------------------|--------------|----------------|--------|
| Acquisition Time (sec) | 2.0972    | Date              |          |                        |              | Date Stamp     |        |
| File Name              |           |                   |          |                        |              |                |        |
| Frequency (MHz)        | 700.17    | Nucleus           | 1H       | Number of Transients   | 8            | Origin         | Avance |
| Original Points Count  | 32768     | Owner             | nmr      | Points Count           | 65536        | Pulse Sequence | zg30   |
| Receiver Gain          | 15.57     | SW(cyclical) (Hz) | 15625.00 | Solvent                | CHLOROFORM-d |                |        |
| Spectrum Offset (Hz)   | 6271.2432 | Sweep Width (Hz)  | 15624.76 | Temperature (degree C) | 24.997       |                |        |

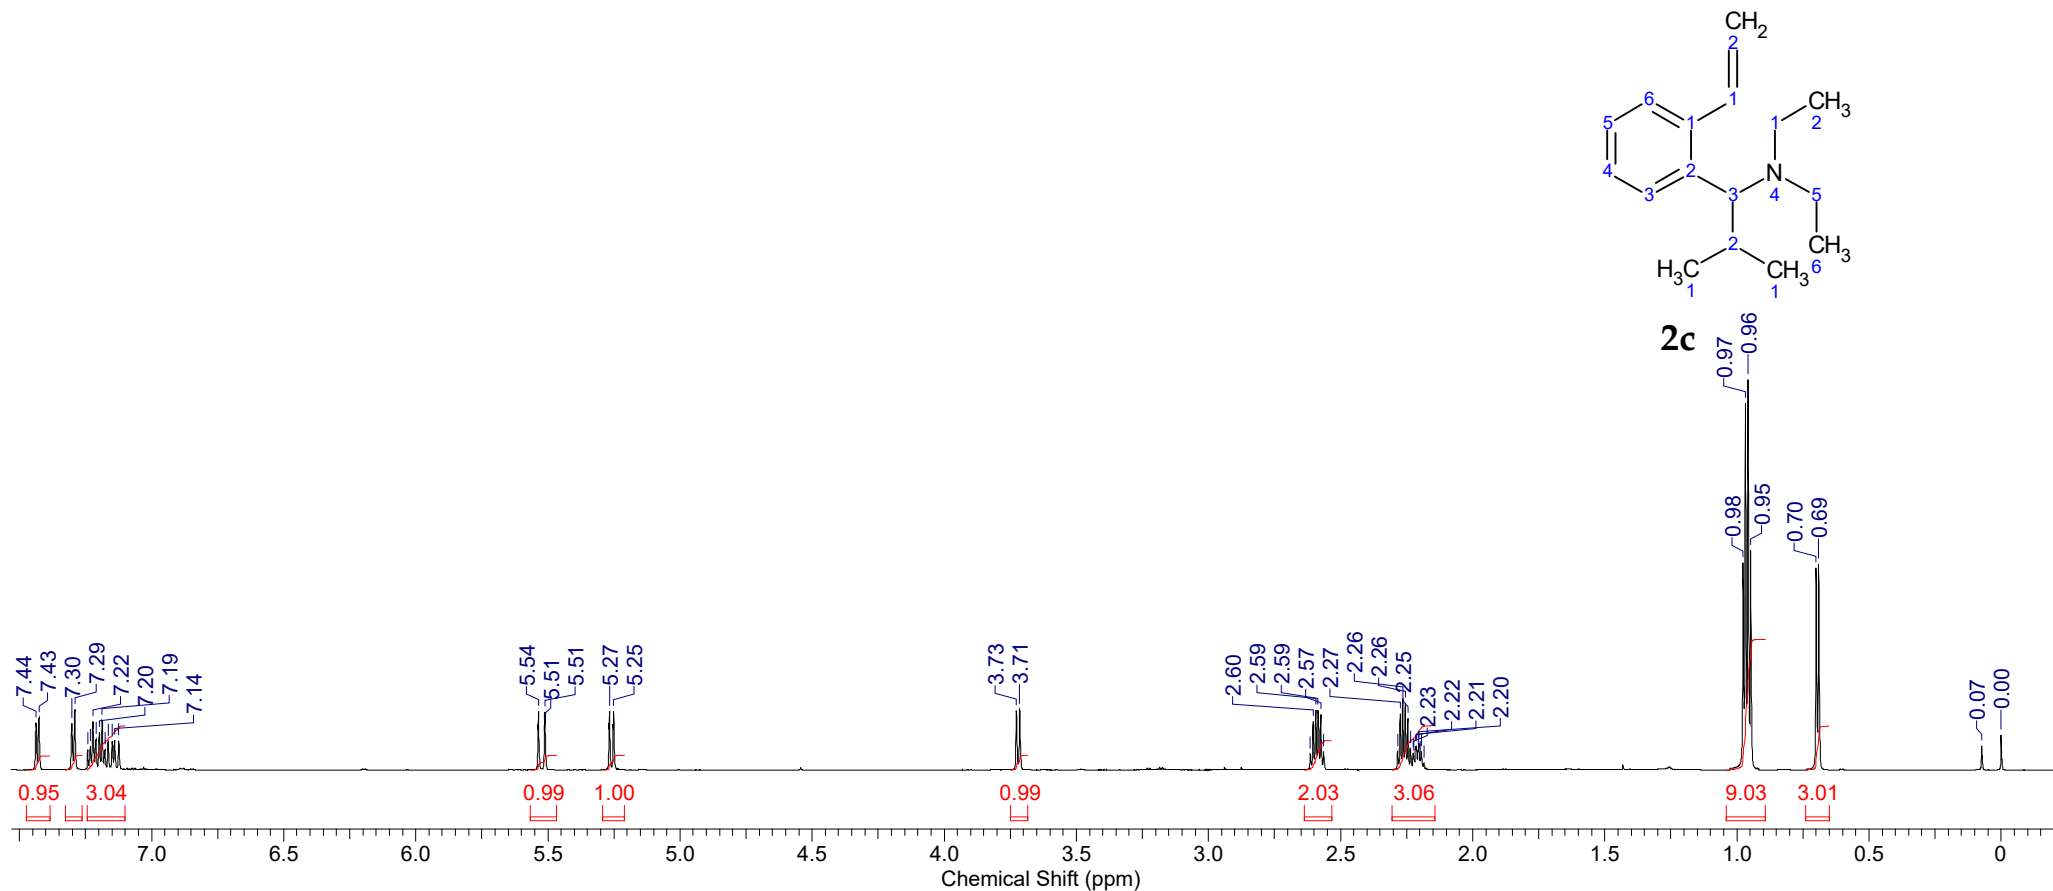



# $^1\text{H}$ NMR spectrum of compound 2c

|                        |           |                   |          |                        |              |                |        |
|------------------------|-----------|-------------------|----------|------------------------|--------------|----------------|--------|
| Acquisition Time (sec) | 2.0972    | Date              |          |                        |              | Date Stamp     |        |
| File Name              |           |                   |          |                        |              |                |        |
| Frequency (MHz)        | 700.17    | Nucleus           | 1H       | Number of Transients   | 8            | Origin         | Avance |
| Original Points Count  | 32768     | Owner             | nmr      | Points Count           | 65536        | Pulse Sequence | zg30   |
| Receiver Gain          | 15.57     | SW(cyclical) (Hz) | 15625.00 | Solvent                | CHLOROFORM-d |                |        |
| Spectrum Offset (Hz)   | 6271.2432 | Sweep Width (Hz)  | 15624.76 | Temperature (degree C) | 24.997       |                |        |

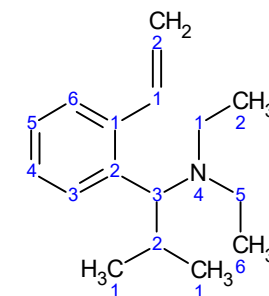

2c

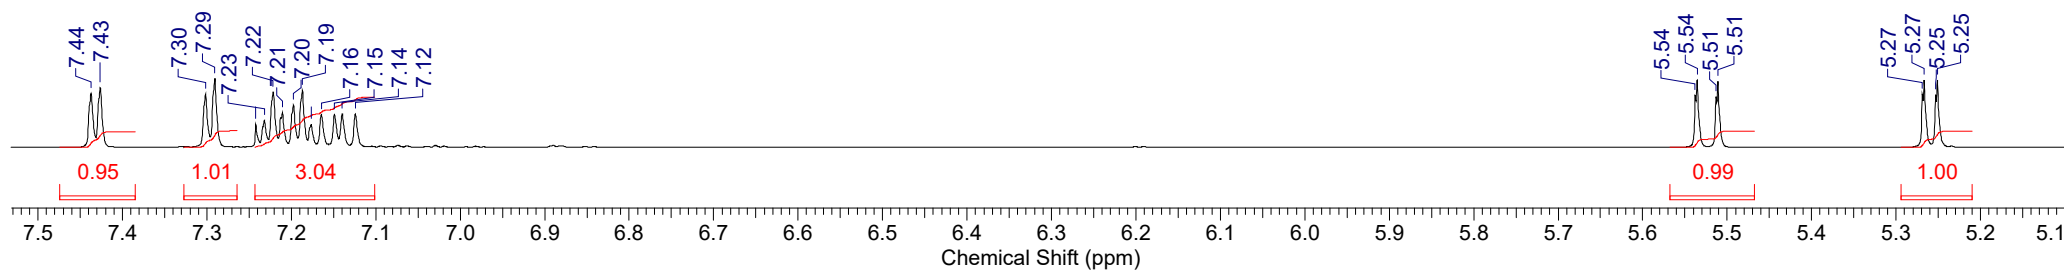

# $^1\text{H}$ NMR spectrum of compound 2c

|                        |           |                   |          |                        |              |                |        |
|------------------------|-----------|-------------------|----------|------------------------|--------------|----------------|--------|
| Acquisition Time (sec) | 2.0972    | Date              |          |                        |              | Date Stamp     |        |
| File Name              |           |                   |          |                        |              |                |        |
| Frequency (MHz)        | 700.17    | Nucleus           | 1H       | Number of Transients   | 8            | Origin         | Avance |
| Original Points Count  | 32768     | Owner             | nmr      | Points Count           | 65536        | Pulse Sequence | zg30   |
| Receiver Gain          | 15.57     | SW(cyclical) (Hz) | 15625.00 | Solvent                | CHLOROFORM-d |                |        |
| Spectrum Offset (Hz)   | 6271.2432 | Sweep Width (Hz)  | 15624.76 | Temperature (degree C) | 24.997       |                |        |

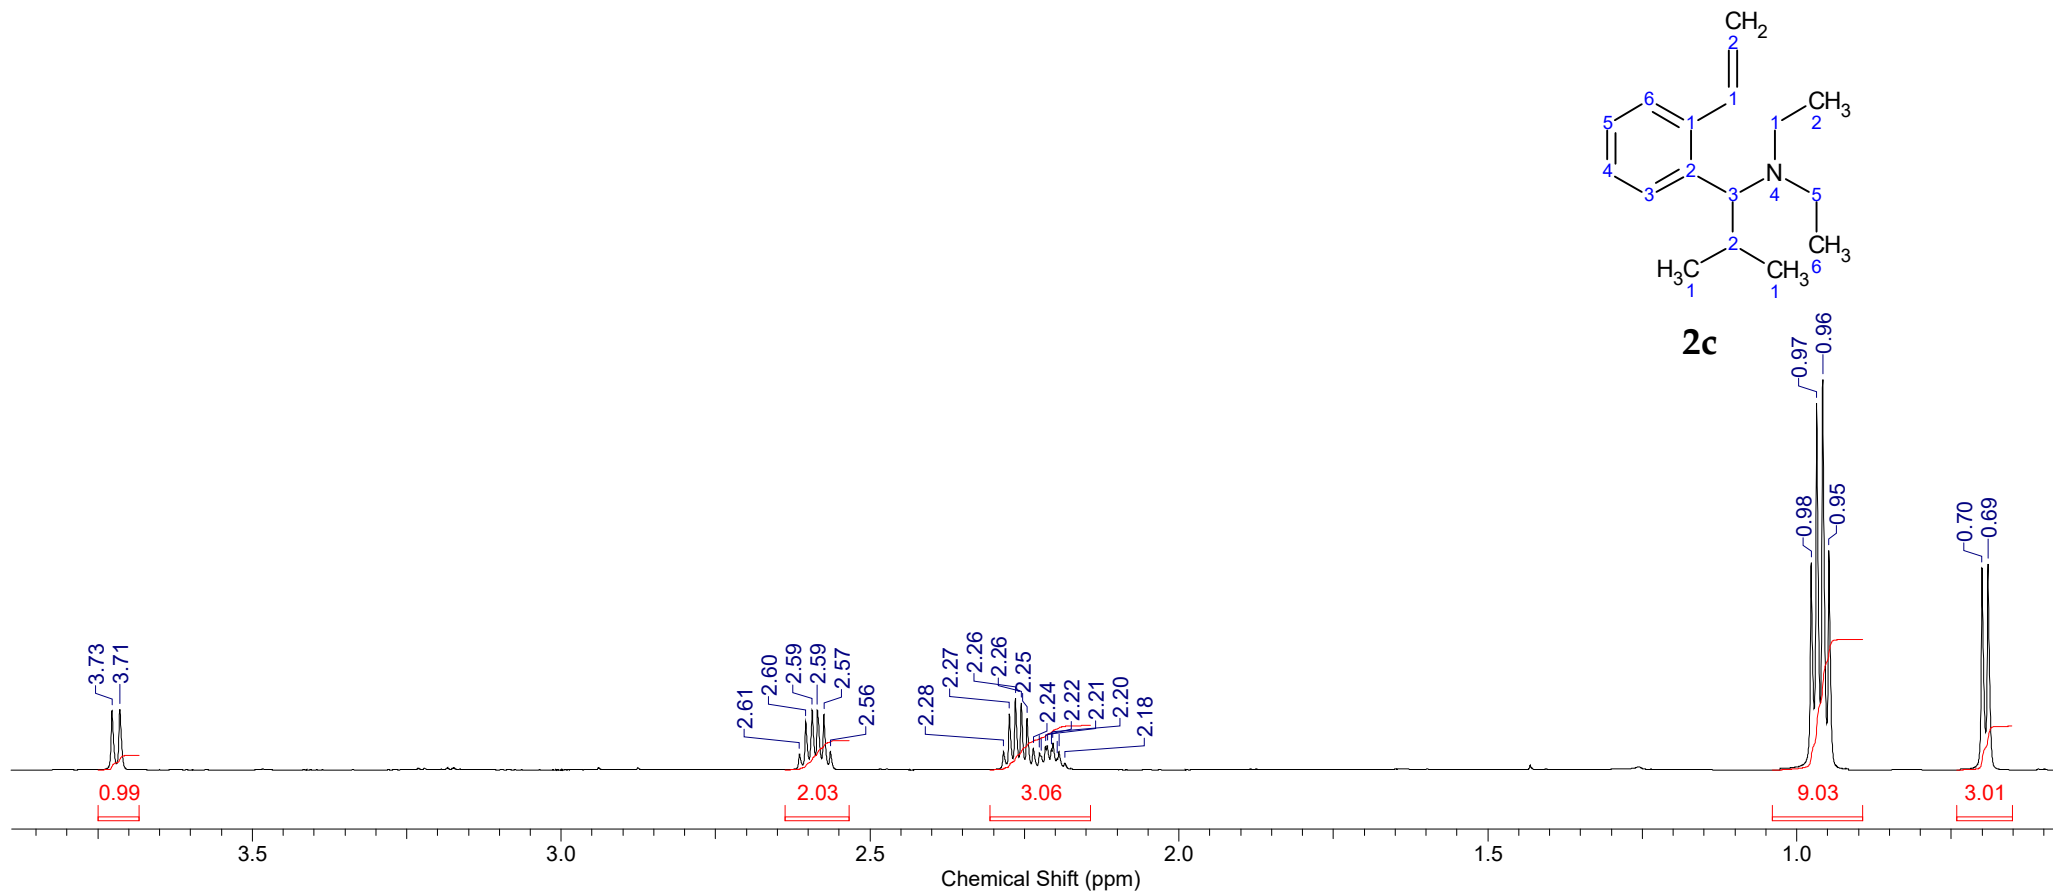

# $^{13}\text{C}$ NMR spectrum of compound **2c**

|                        |                 |                        |              |                      |            |
|------------------------|-----------------|------------------------|--------------|----------------------|------------|
| Acquisition Time (sec) | 0.7406          | Date                   |              |                      | Date Stamp |
| File Name              |                 |                        |              |                      | 176.06     |
| Nucleus                | $^{13}\text{C}$ | Number of Transients   | 400          | Origin               | Avance     |
| Owner                  | nmr             | Points Count           | 32768        | Pulse Sequence       | zgpg30     |
| SW(cyclical) (Hz)      | 44247.79        | Solvent                | CHLOROFORM-d | Spectrum Offset (Hz) |            |
| Sweep Width (Hz)       | 44246.44        | Temperature (degree C) | 24.990       |                      |            |

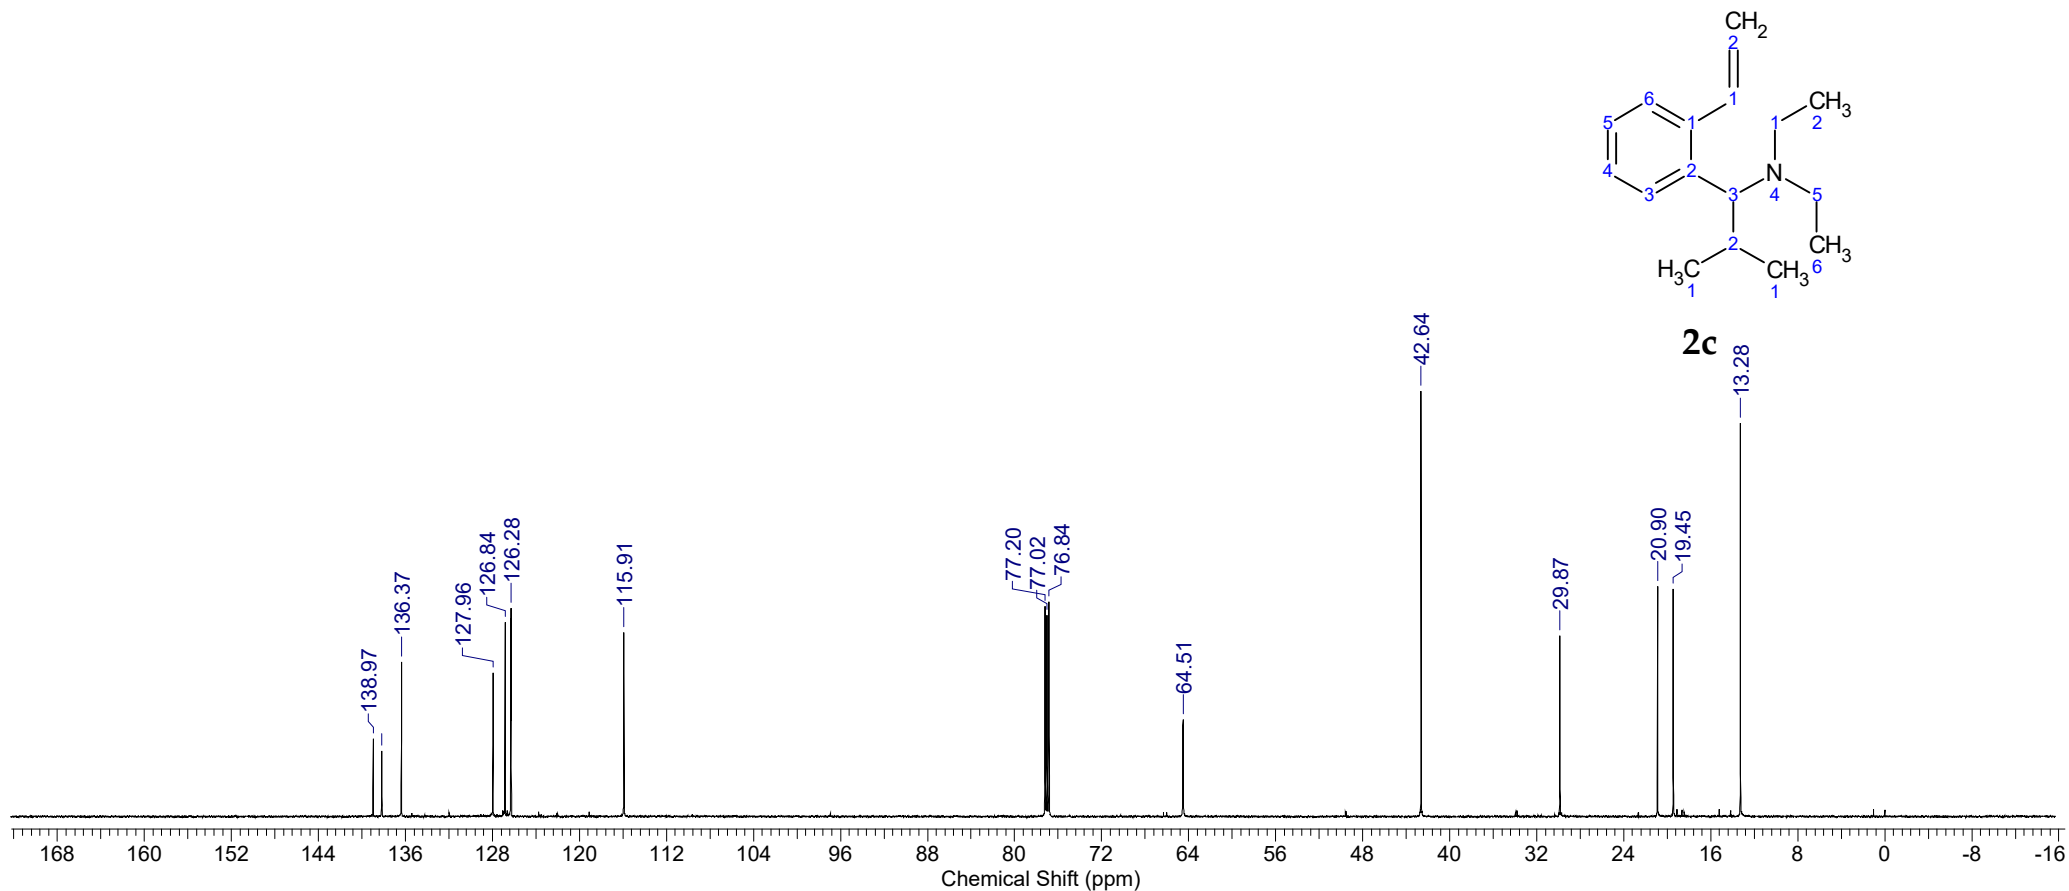

# $^{13}\text{C}$ NMR spectrum of compound **2c**

|                        |                 |                        |              |                      |            |
|------------------------|-----------------|------------------------|--------------|----------------------|------------|
| Acquisition Time (sec) | 0.7406          | Date                   |              |                      | Date Stamp |
| File Name              |                 |                        |              |                      | 176.06     |
| Nucleus                | $^{13}\text{C}$ | Number of Transients   | 400          | Origin               | Avance     |
| Owner                  | nmr             | Points Count           | 32768        | Pulse Sequence       | zgpg30     |
| SW(cyclical) (Hz)      | 44247.79        | Solvent                | CHLOROFORM-d | Spectrum Offset (Hz) |            |
| Sweep Width (Hz)       | 44246.44        | Temperature (degree C) | 24.990       |                      |            |

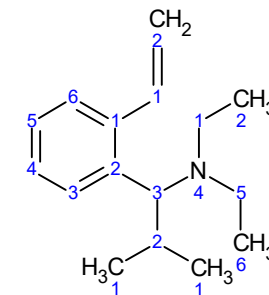

**2c**

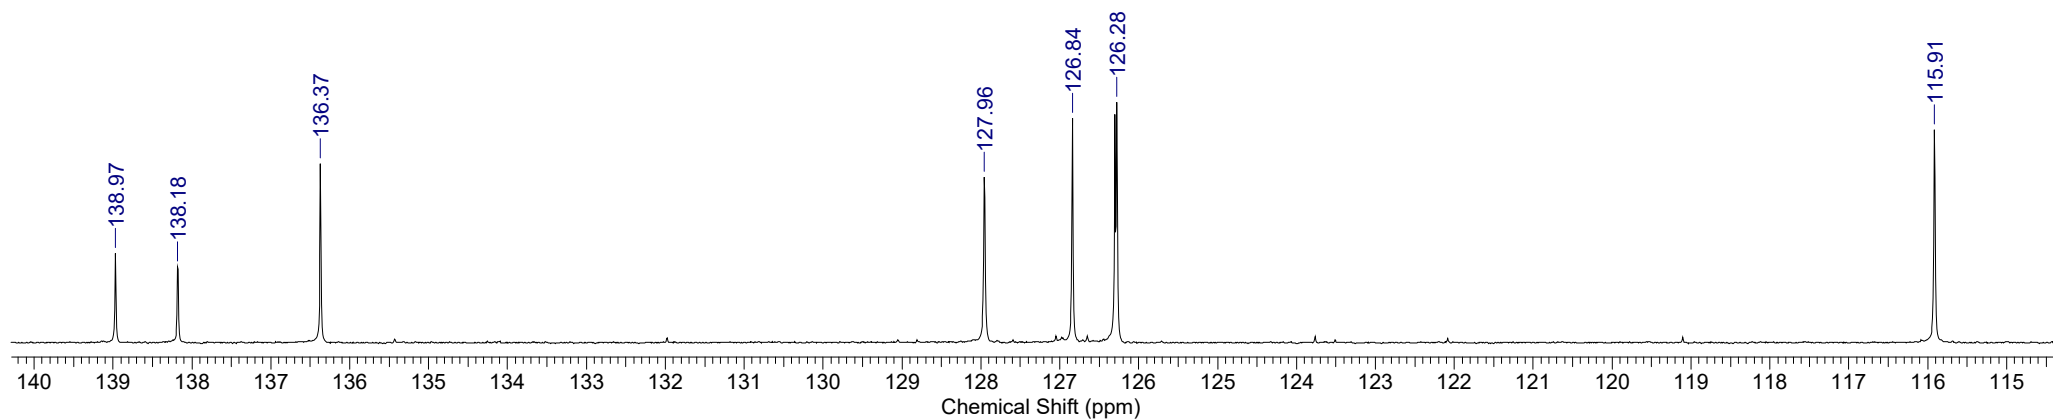

# $^{13}\text{C}$ NMR spectrum of compound **2c**

|                               |     |                               |                |            |                                 |
|-------------------------------|-----|-------------------------------|----------------|------------|---------------------------------|
| Acquisition Time (sec) 0.7406 |     | Date                          |                | Date Stamp |                                 |
| File Name                     |     |                               |                | 176.06     |                                 |
| Nucleus                       | 13C | Number of Transients 400      | Origin         | Avance     | Original Points Count 32768     |
| Owner                         | nmr | Points Count 32768            | Pulse Sequence | zgpg30     | Receiver Gain 101.00            |
| SW(cyclical) (Hz) 44247.79    |     | Solvent CHLOROFORM-d          |                |            | Spectrum Offset (Hz) 19363.1328 |
| Sweep Width (Hz) 44246.44     |     | Temperature (degree C) 24.990 |                |            |                                 |

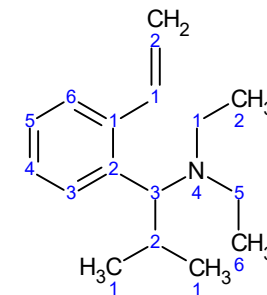

**2c**

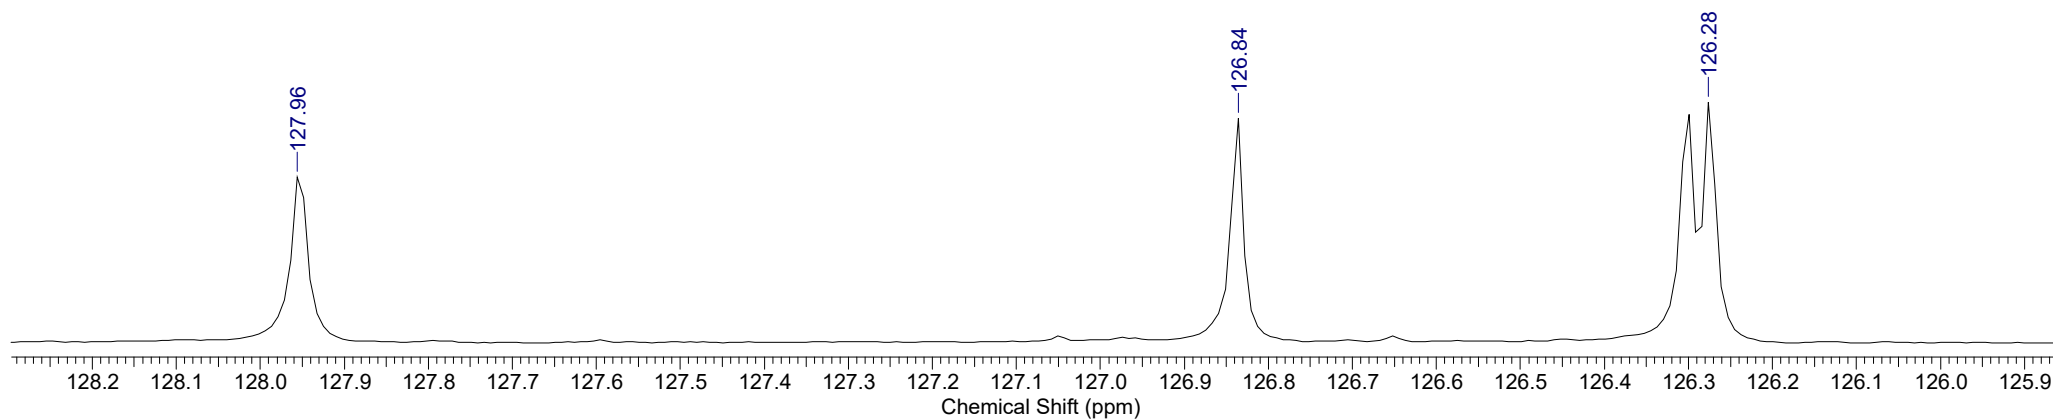

# $^{13}\text{C}$ NMR spectrum of compound **2c**

|                        |          |                        |              |                |                      |
|------------------------|----------|------------------------|--------------|----------------|----------------------|
| Acquisition Time (sec) | 0.7406   | Date                   |              |                | Date Stamp           |
| File Name              |          |                        |              | 176.06         |                      |
| Nucleus                | 13C      | Number of Transients   | 400          | Origin         | Avance               |
| Owner                  | nmr      | Points Count           | 32768        | Pulse Sequence | zgpg30               |
| SW(cyclical) (Hz)      | 44247.79 | Solvent                | CHLOROFORM-d |                | Spectrum Offset (Hz) |
| Sweep Width (Hz)       | 44246.44 | Temperature (degree C) | 24.990       |                |                      |

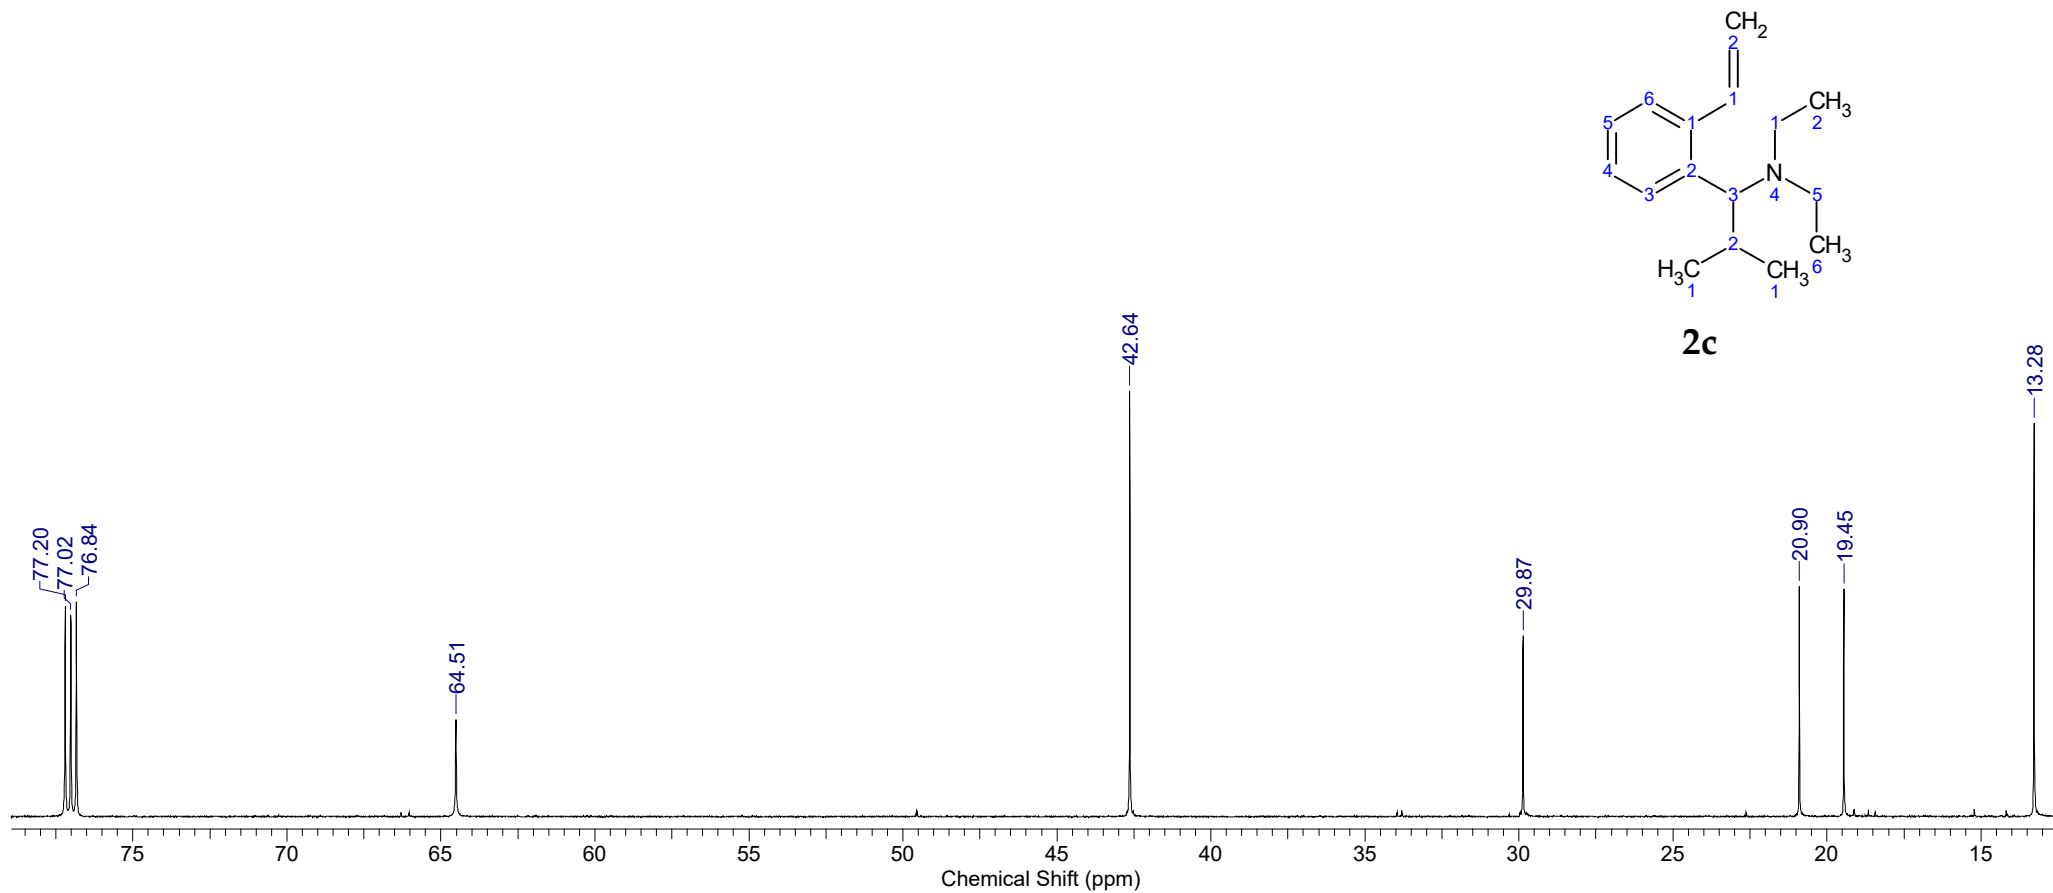

# HRMS (MALDI-TOF) spectrum of compound **2c**

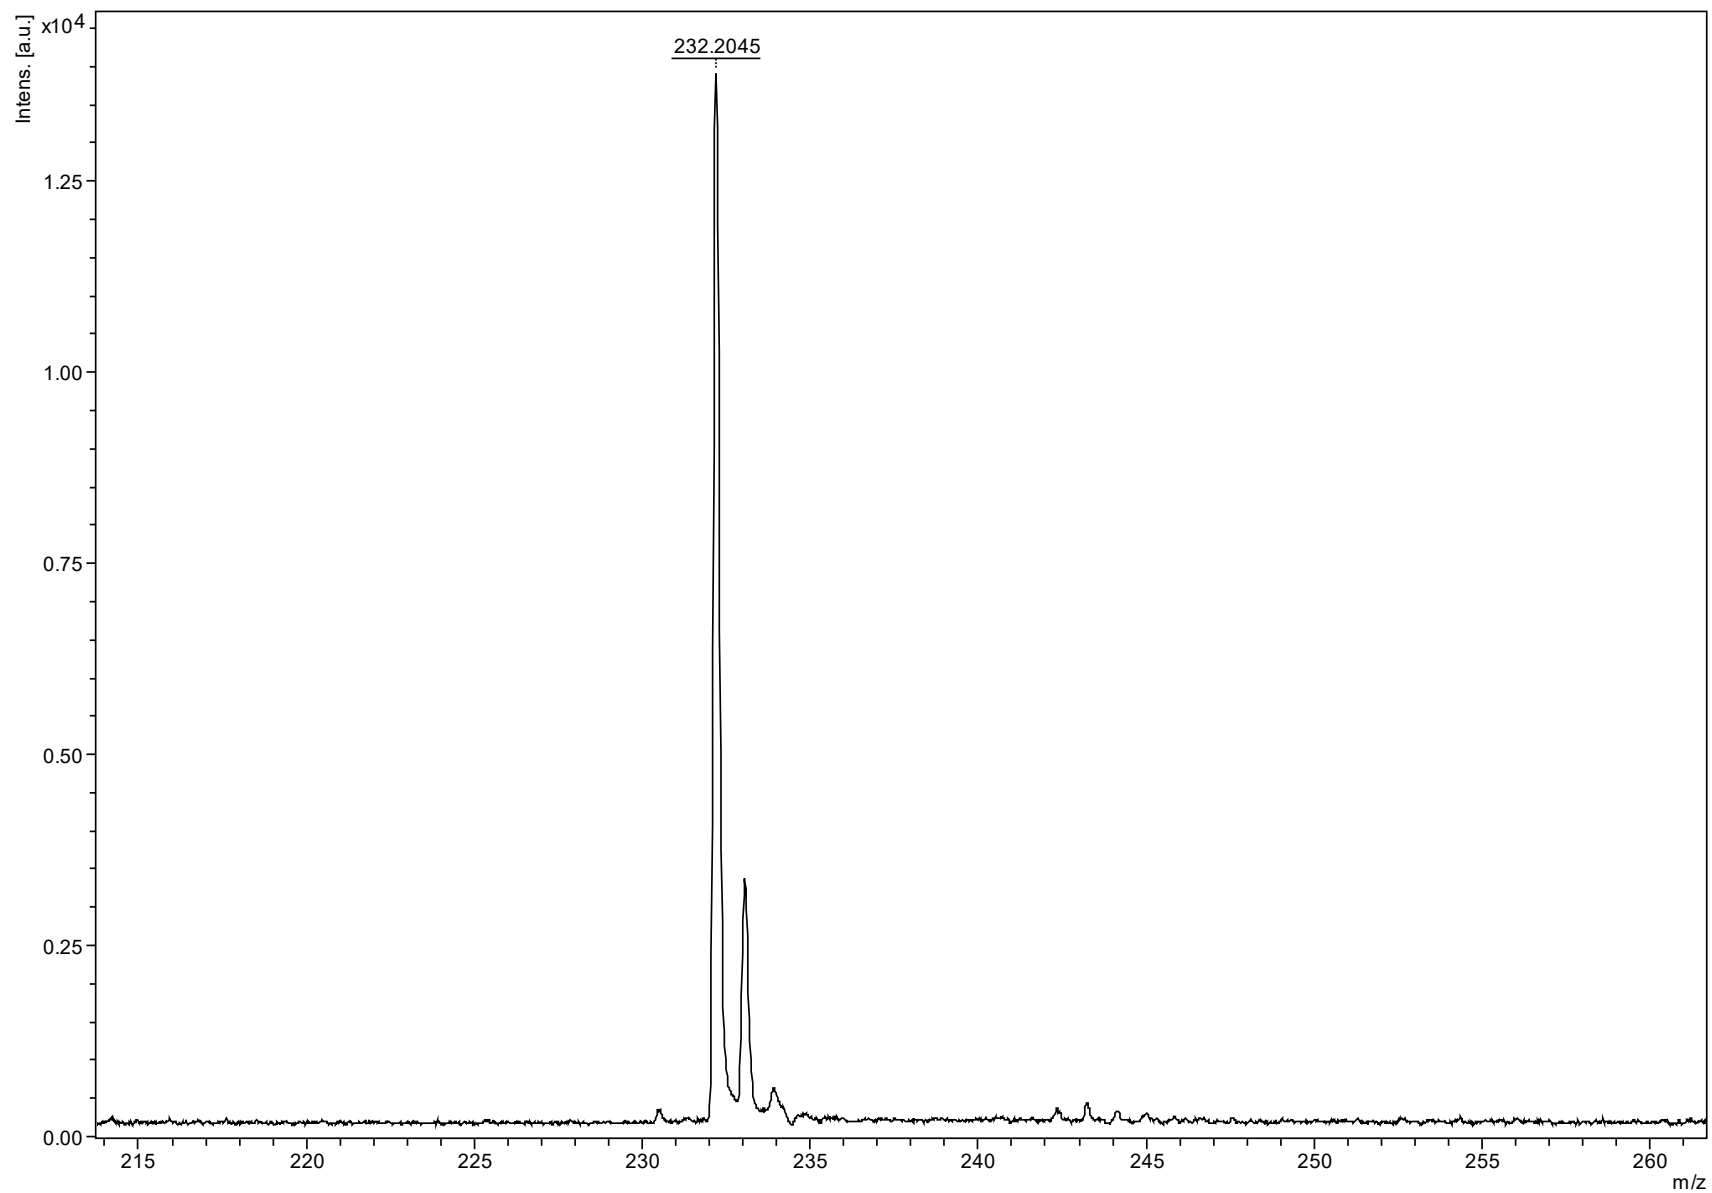

# <sup>1</sup>H NMR spectrum of compound 3a

|                        |              |                      |              |                       |                  |
|------------------------|--------------|----------------------|--------------|-----------------------|------------------|
| Acquisition Time (sec) | 1.9818       | Comment              | single pulse | Date                  |                  |
| Date Stamp             |              |                      |              |                       |                  |
| File Name              |              |                      |              | Frequency (MHz)       | 600.17           |
| Nucleus                | 1H           | Number of Transients | 8            | Origin                | ECA 600          |
| Owner                  | CKP          | Points Count         | 32768        | Pulse Sequence        | single_pulse.ex2 |
| Solvent                | CHLOROFORM-d | Spectrum Offset (Hz) | 5401.5503    | Sweep Width (Hz)      | 16534.39         |
|                        |              |                      |              | Original Points Count | 32768            |
|                        |              |                      |              | Receiver Gain         | 28.00            |

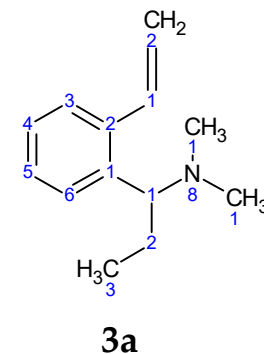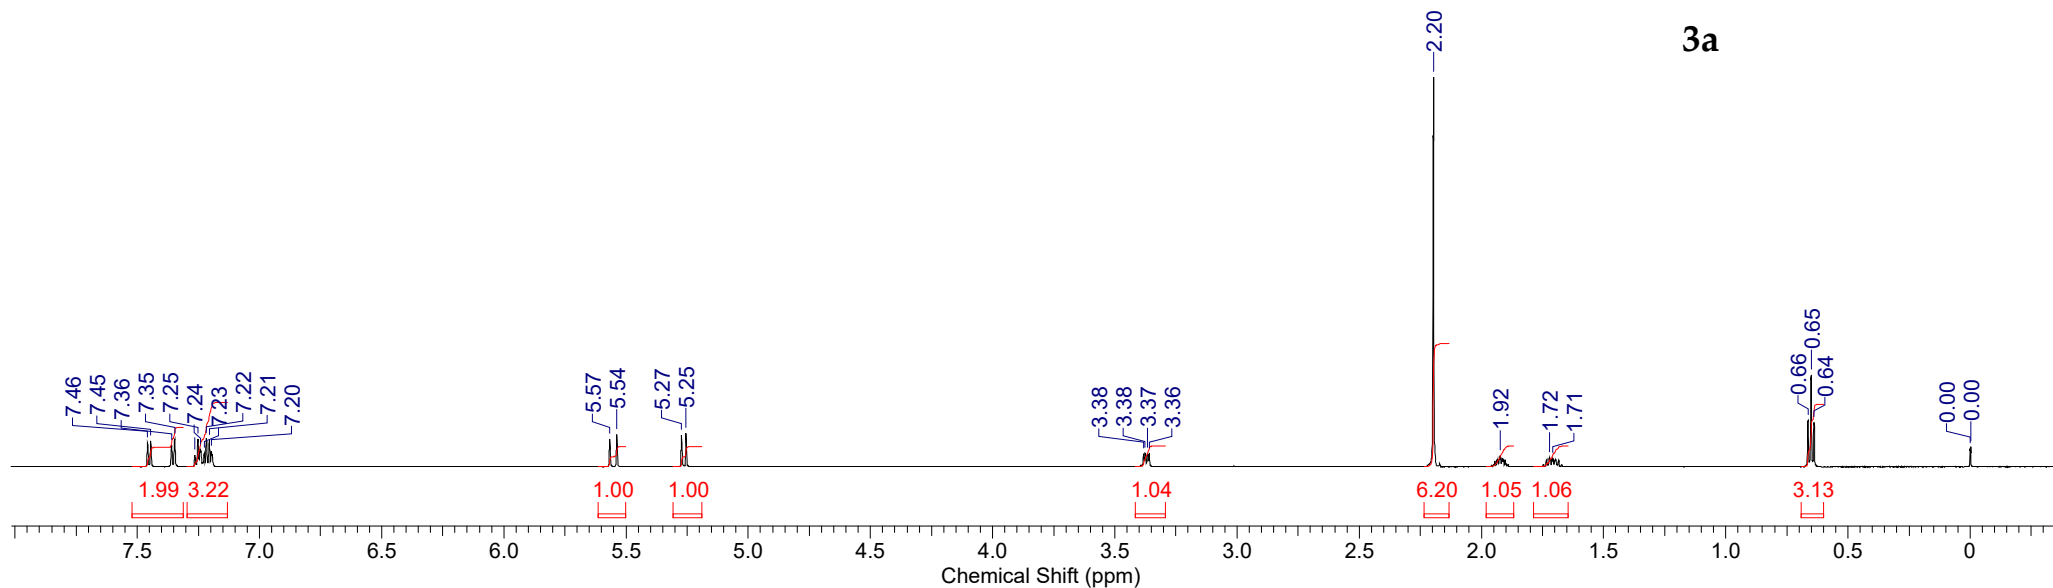



# $^1\text{H}$ NMR spectrum of compound **3a**

|                        |              |                      |              |                       |                  |
|------------------------|--------------|----------------------|--------------|-----------------------|------------------|
| Acquisition Time (sec) | 1.9818       | Comment              | single pulse | Date                  |                  |
| Date Stamp             |              |                      |              |                       |                  |
| File Name              |              |                      |              | Frequency (MHz)       | 600.17           |
| Nucleus                | $^1\text{H}$ | Number of Transients | 8            | Origin                | ECA 600          |
| Owner                  | CKP          | Points Count         | 32768        | Pulse Sequence        | single_pulse.ex2 |
| Solvent                | CHLOROFORM-d | Spectrum Offset (Hz) | 5401.5503    | Sweep Width (Hz)      | 16534.39         |
|                        |              |                      |              | Original Points Count | 32768            |
|                        |              |                      |              | Receiver Gain         | 28.00            |

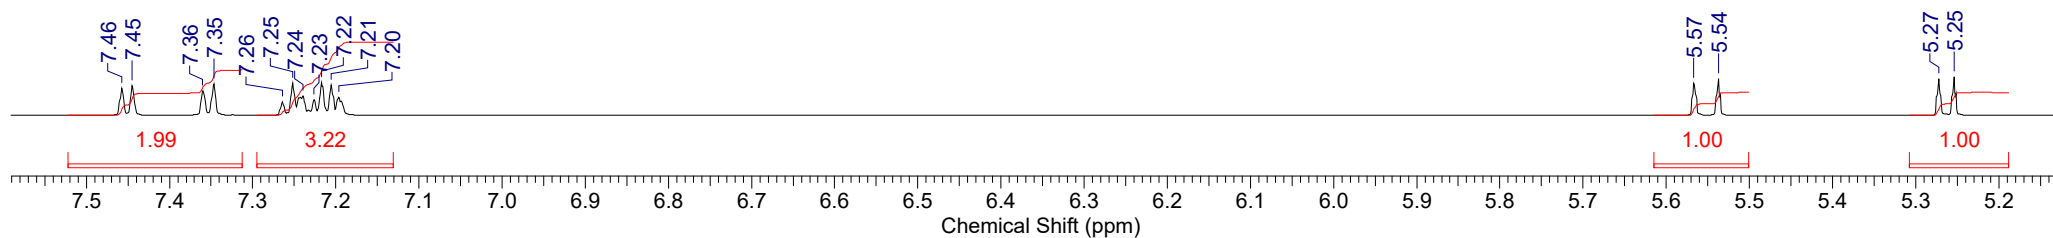

# $^1\text{H}$ NMR spectrum of compound **3a**

|                        |              |                      |              |                       |                  |
|------------------------|--------------|----------------------|--------------|-----------------------|------------------|
| Acquisition Time (sec) | 1.9818       | Comment              | single pulse | Date                  |                  |
| Date Stamp             |              |                      |              |                       |                  |
| File Name              |              |                      |              | Frequency (MHz)       | 600.17           |
| Nucleus                | $^1\text{H}$ | Number of Transients | 8            | Origin                | ECA 600          |
| Owner                  | CKP          | Points Count         | 32768        | Pulse Sequence        | single_pulse.ex2 |
| Solvent                | CHLOROFORM-d | Spectrum Offset (Hz) | 5401.5503    | Sweep Width (Hz)      | 16534.39         |
|                        |              |                      |              | Original Points Count | 32768            |
|                        |              |                      |              | Receiver Gain         | 28.00            |

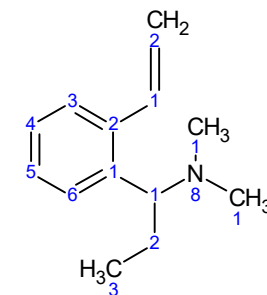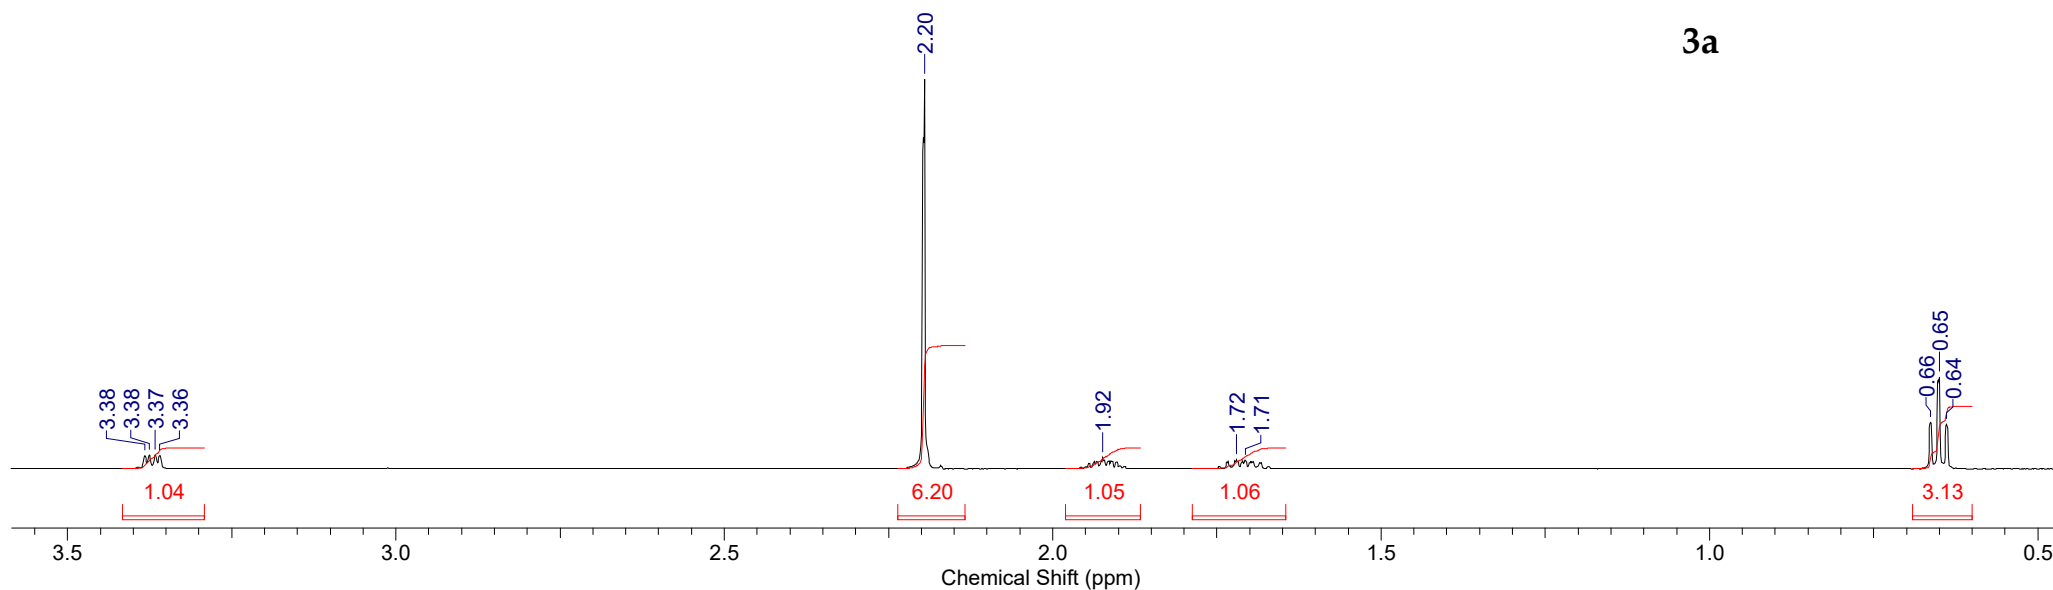

# $^{13}\text{C}$ NMR spectrum of compound 3a

|                |                                      |           |          |
|----------------|--------------------------------------|-----------|----------|
| <b>Formula</b> | $\text{C}_{13}\text{H}_{19}\text{N}$ | <b>FW</b> | 189.2967 |
|----------------|--------------------------------------|-----------|----------|

|                               |                      |                             |                                  |                              |                      |
|-------------------------------|----------------------|-----------------------------|----------------------------------|------------------------------|----------------------|
| <b>Acquisition Time (sec)</b> | 0.6921               | <b>Comment</b>              | single pulse decoupled gated NOE | <b>Date</b>                  | 07 Oct 2022 11:01:59 |
| <b>Date Stamp</b>             | 07 Oct 2022 10:47:14 |                             |                                  |                              |                      |
| <b>File Name</b>              |                      |                             |                                  | <b>Frequency (MHz)</b>       | 150.91               |
| <b>Nucleus</b>                | $^{13}\text{C}$      | <b>Number of Transients</b> | 1000                             | <b>Original Points Count</b> | 32768                |
| <b>Owner</b>                  | CKP                  | <b>Points Count</b>         | 32768                            | <b>Pulse Sequence</b>        | single_pulse_dec     |
| <b>Solvent</b>                | CHLOROFORM-d         | <b>Spectrum Offset (Hz)</b> | 15077.9072                       | <b>Receiver Gain</b>         | 54.00                |
|                               |                      | <b>Sweep Width (Hz)</b>     | 47348.49                         |                              |                      |

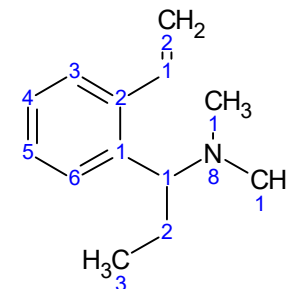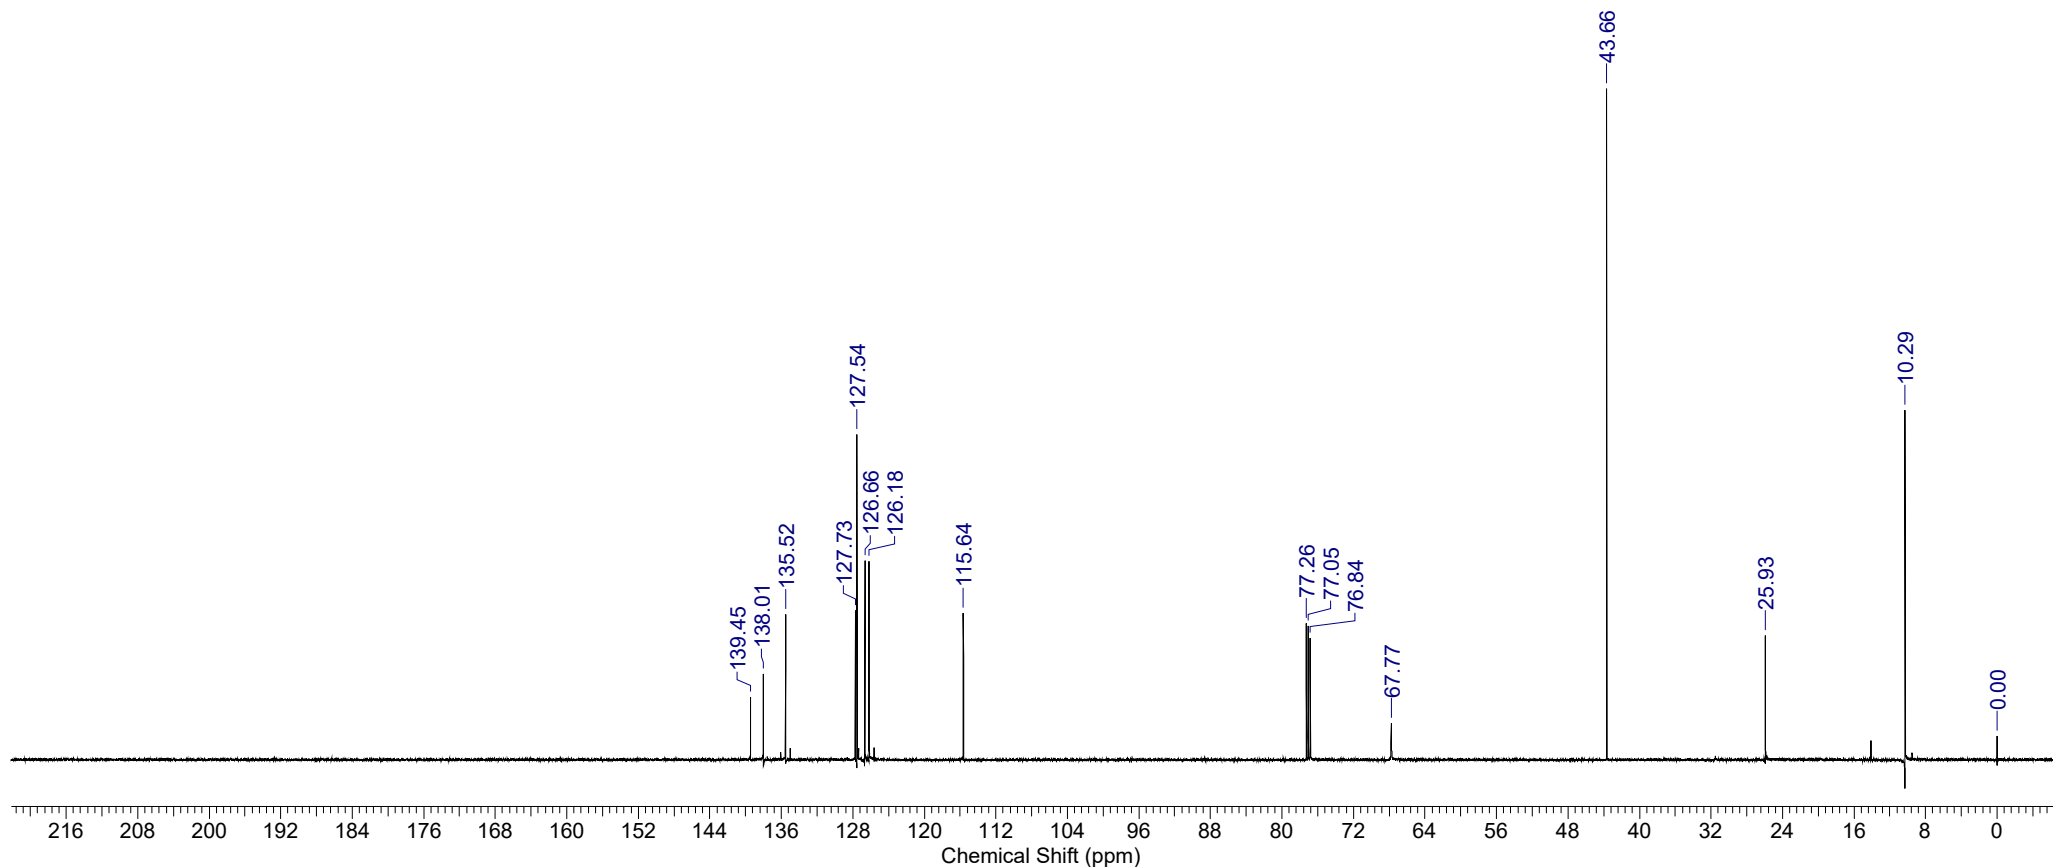

# <sup>13</sup>C NMR spectrum of compound 3a

|                |       |           |          |
|----------------|-------|-----------|----------|
| <b>Formula</b> | C H N | <b>FW</b> | 189.2967 |
|----------------|-------|-----------|----------|

|                               |                      |                             |                                  |                              |                      |
|-------------------------------|----------------------|-----------------------------|----------------------------------|------------------------------|----------------------|
| <b>Acquisition Time (sec)</b> | 0.6921               | <b>Comment</b>              | single pulse decoupled gated NOE | <b>Date</b>                  | 07 Oct 2022 11:01:59 |
| <b>Date Stamp</b>             | 07 Oct 2022 10:47:14 |                             |                                  |                              |                      |
| <b>File Name</b>              |                      |                             |                                  | <b>Frequency (MHz)</b>       | 150.91               |
| <b>Nucleus</b>                | <sup>13</sup> C      | <b>Number of Transients</b> | 1000                             | <b>Origin</b>                | ECA 600              |
| <b>Owner</b>                  | CKP                  | <b>Points Count</b>         | 32768                            | <b>Pulse Sequence</b>        | single pulse dec     |
| <b>Solvent</b>                | CHLOROFORM-d         | <b>Spectrum Offset (Hz)</b> | 15077.9072                       | <b>Sweep Width (Hz)</b>      | 47348.49             |
|                               |                      |                             |                                  | <b>Original Points Count</b> | 32768                |
|                               |                      |                             |                                  | <b>Receiver Gain</b>         | 54.00                |

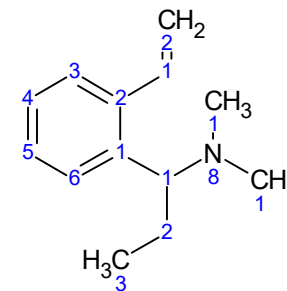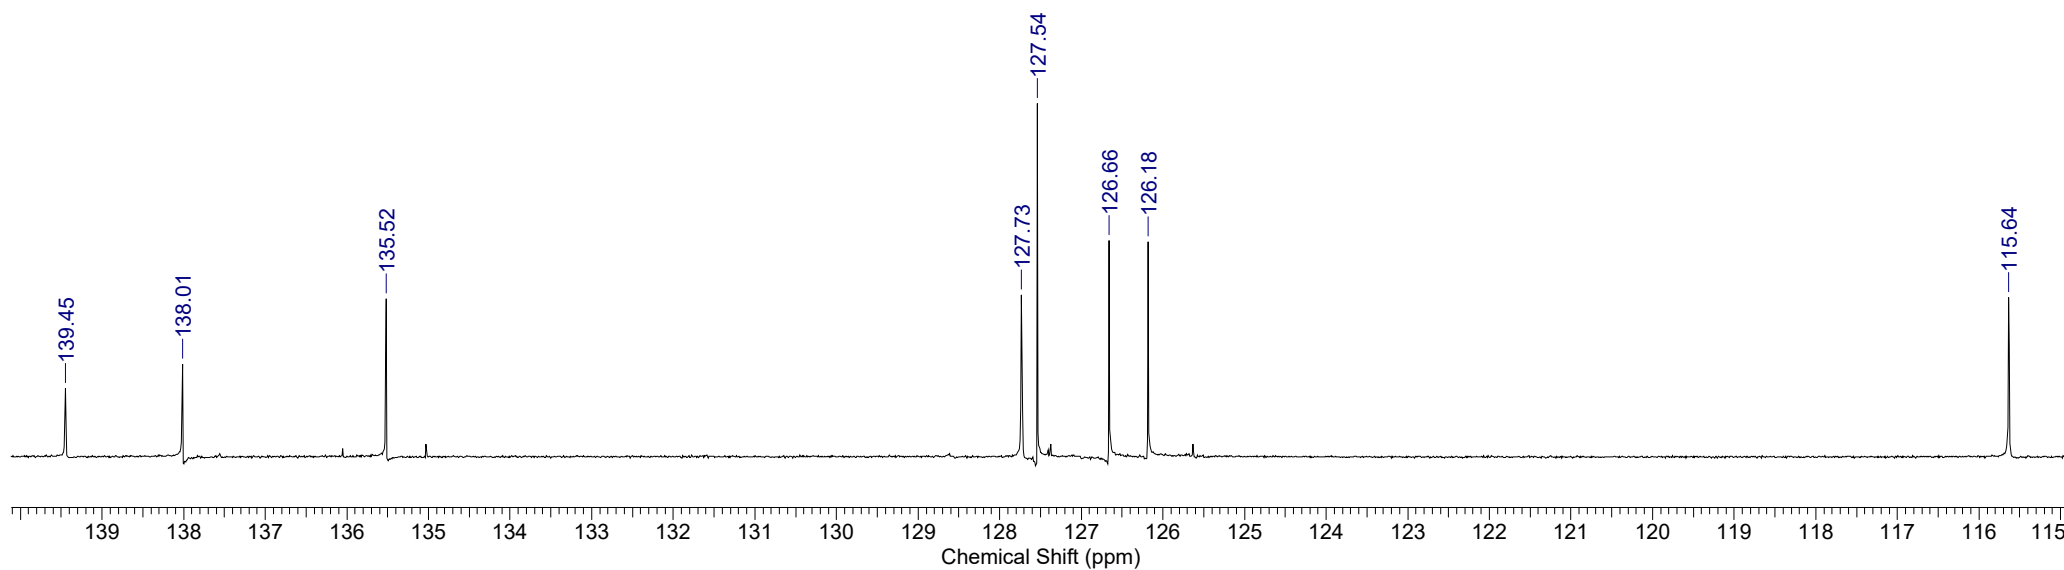

$^{13}\text{C}$  NMR spectrum of compound **3a**

|                                                  |                    |
|--------------------------------------------------|--------------------|
| <b>Formula</b> C <sub>12</sub> H <sub>10</sub> N | <b>FW</b> 189.2967 |
|--------------------------------------------------|--------------------|

|                               |                      |                             |                                  |                         |                        |                              |       |
|-------------------------------|----------------------|-----------------------------|----------------------------------|-------------------------|------------------------|------------------------------|-------|
| <b>Acquisition Time (sec)</b> | 0.6921               | <b>Comment</b>              | single pulse decoupled gated NOE |                         | <b>Date</b>            | 07 Oct 2022 11:01:59         |       |
| <b>Date Stamp</b>             | 07 Oct 2022 10:47:14 |                             |                                  |                         |                        |                              |       |
| <b>File Name</b>              |                      |                             |                                  |                         | <b>Frequency (MHz)</b> | 150.91                       |       |
| <b>Nucleus</b>                | 13C                  | <b>Number of Transients</b> | 1000                             | <b>Origin</b>           | ECA 600                | <b>Original Points Count</b> | 32768 |
| <b>Owner</b>                  | CKP                  | <b>Points Count</b>         | 32768                            | <b>Pulse Sequence</b>   | single pulse dec       | <b>Receiver Gain</b>         | 54.00 |
| <b>Solvent</b>                | CHLOROFORM-d         | <b>Spectrum Offset (Hz)</b> | 15077.9072                       | <b>Sweep Width (Hz)</b> | 47348.49               |                              |       |

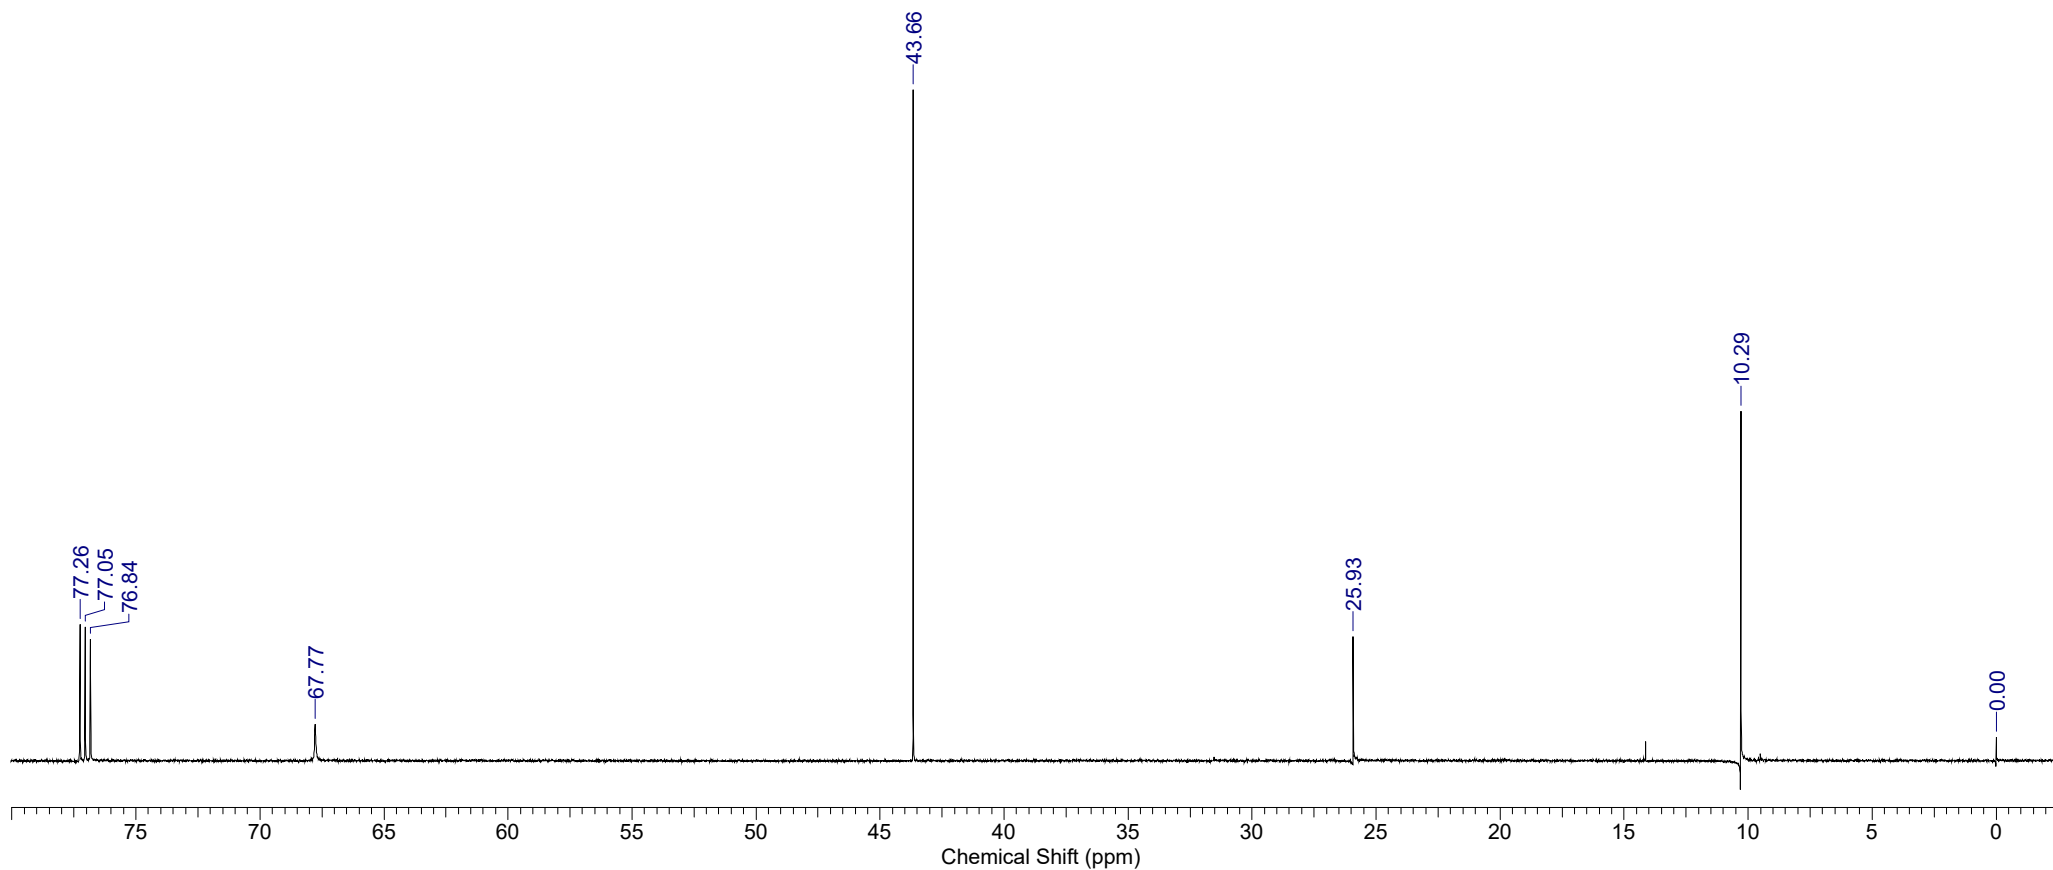

IR spectrum of compound 3a

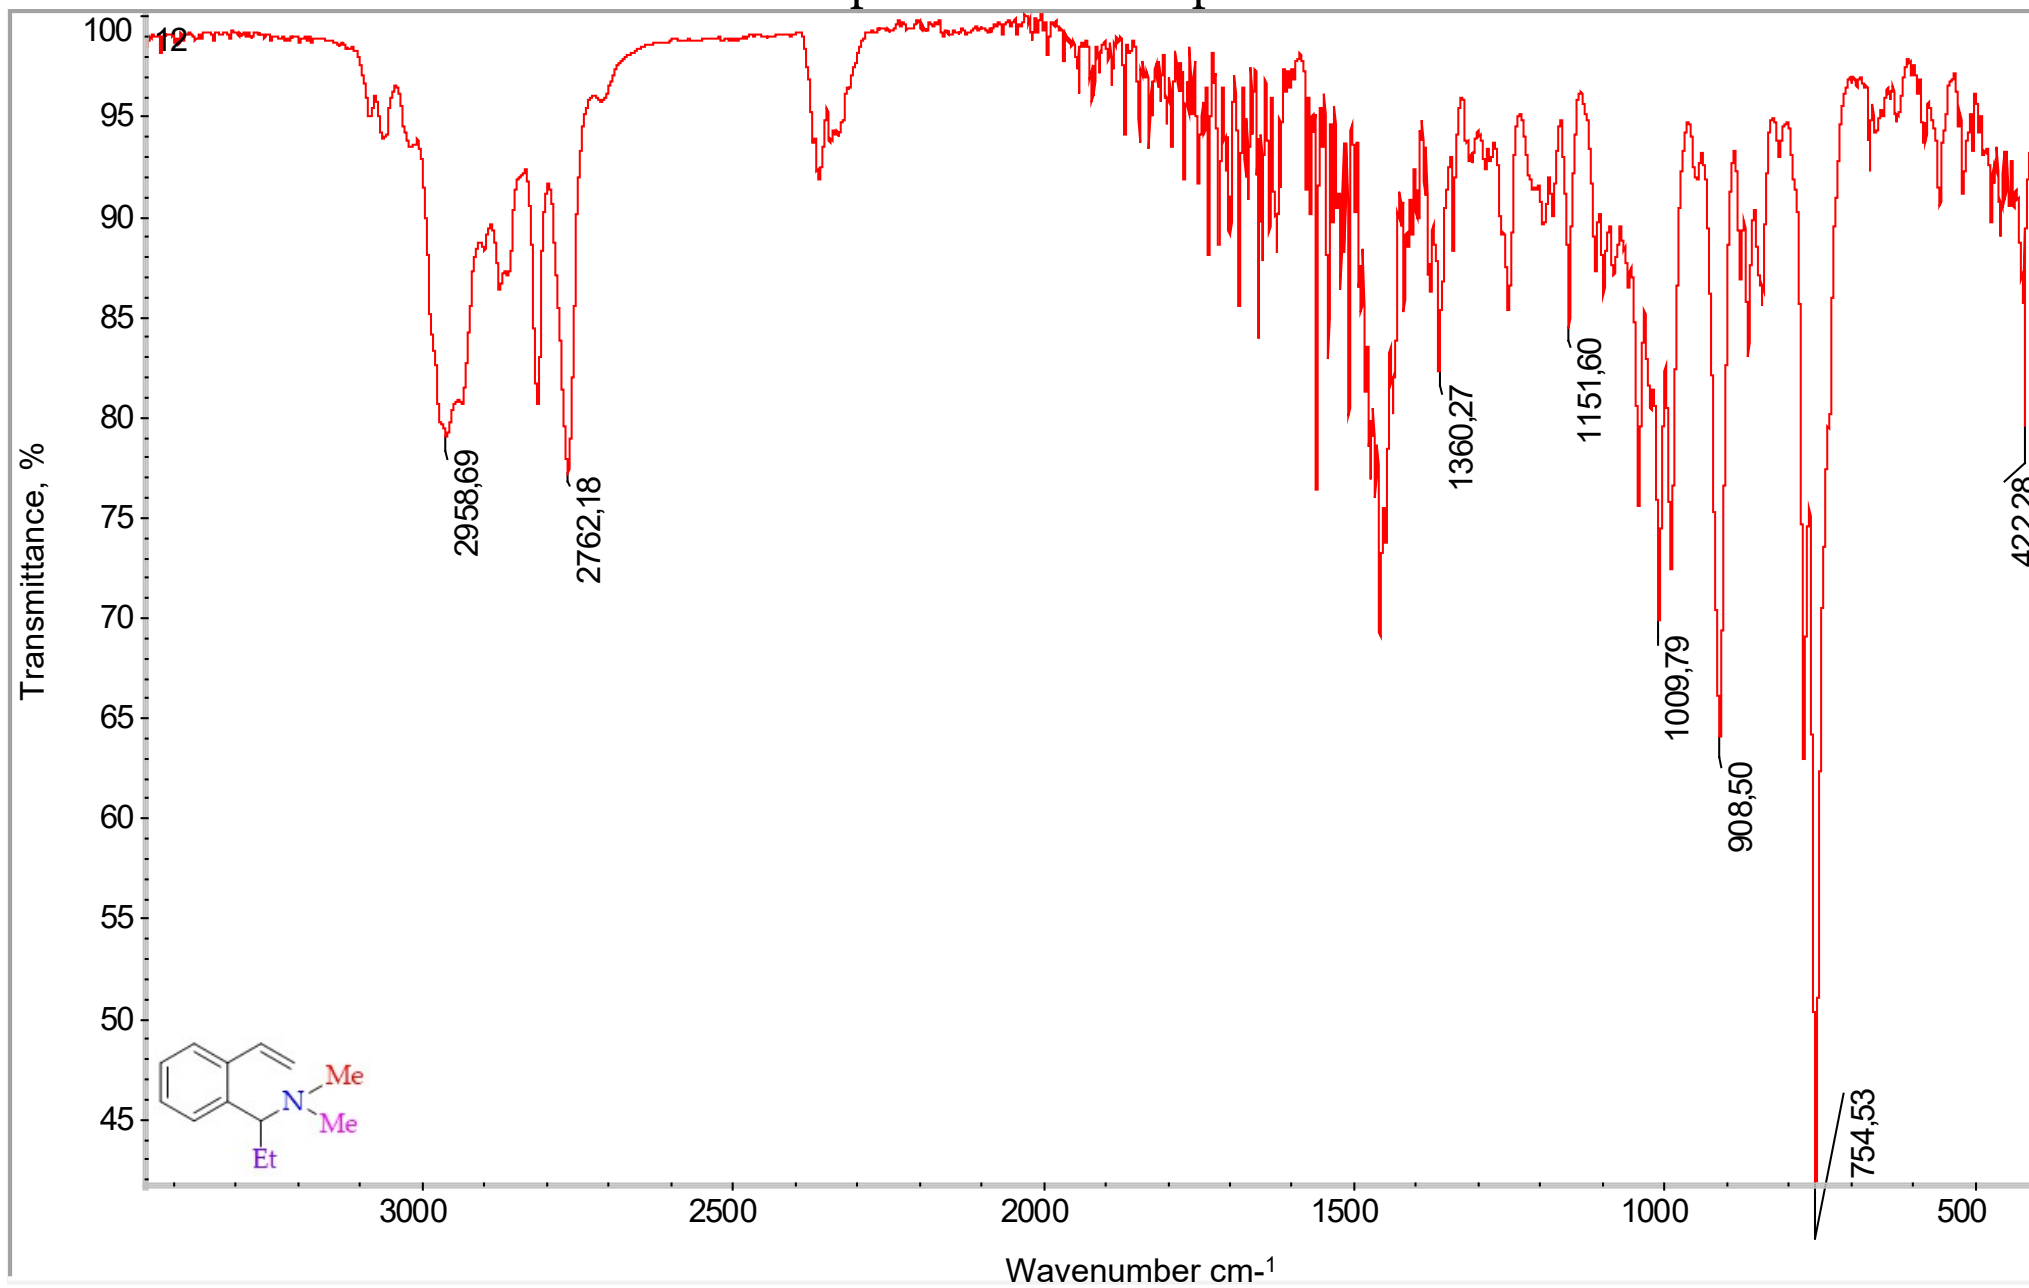

# $^1\text{H}$ NMR spectrum of compound **3b**

|                        |              |                      |              |                       |                  |
|------------------------|--------------|----------------------|--------------|-----------------------|------------------|
| Acquisition Time (sec) | 1.9818       | Comment              | single pulse | Date                  |                  |
| Date Stamp             |              |                      |              |                       |                  |
| File Name              |              |                      |              | Frequency (MHz)       | 600.17           |
| Nucleus                | $^1\text{H}$ | Number of Transients | 8            | Origin                | ECA 600          |
| Owner                  | CKP          | Points Count         | 32768        | Pulse Sequence        | single_pulse.ex2 |
| Solvent                | CHLOROFORM-d | Spectrum Offset (Hz) | 5392.4614    | Sweep Width (Hz)      | 16534.39         |
|                        |              |                      |              | Original Points Count | 32768            |
|                        |              |                      |              | Receiver Gain         | 24.00            |

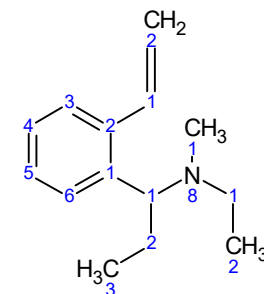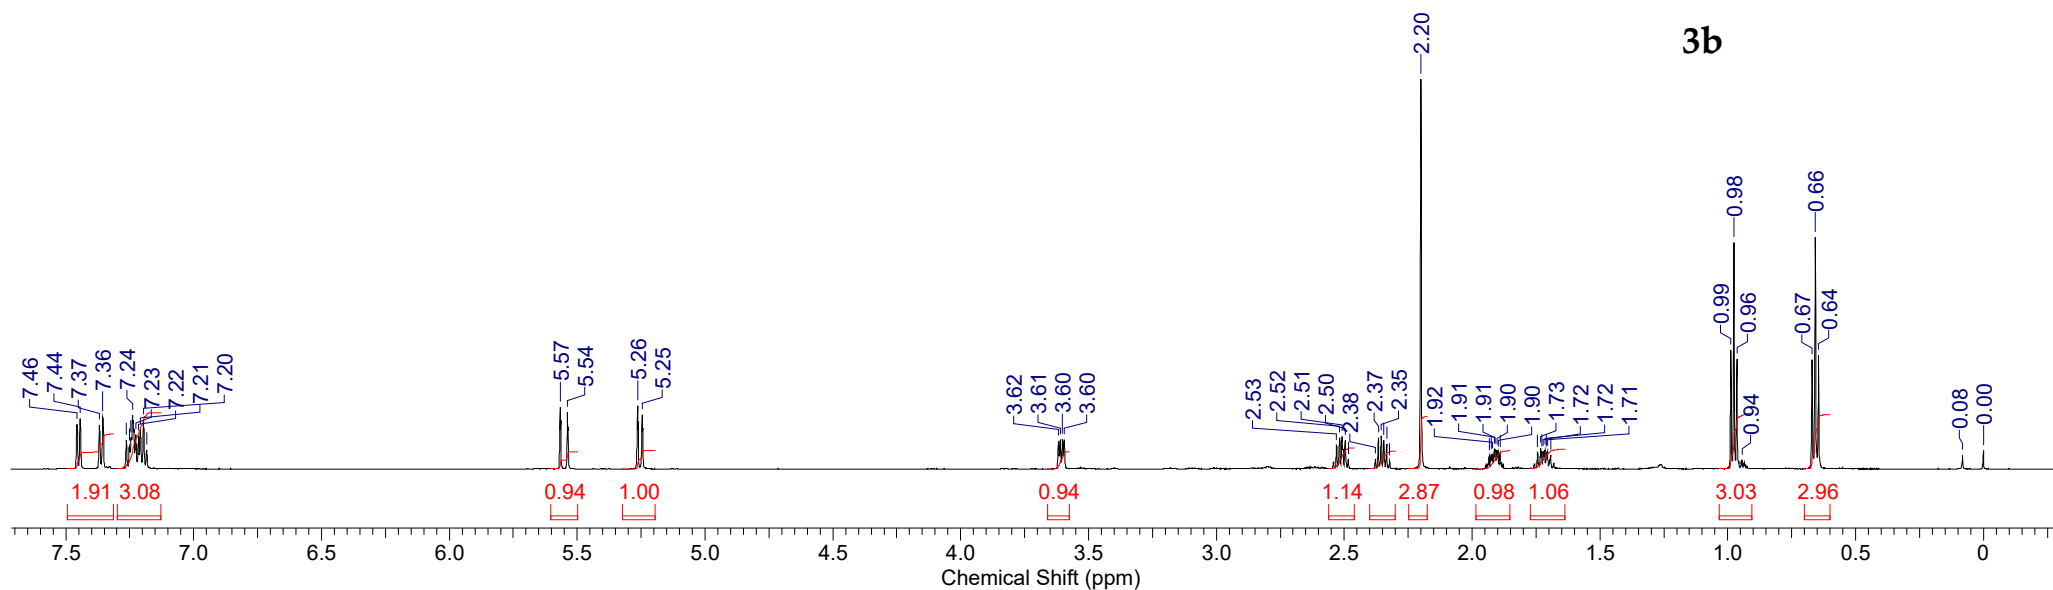

<sup>1</sup>H NMR spectrum of compound **3b**

|                        |  |              |                      |  |              |                  |  |                  |                       |        |       |
|------------------------|--|--------------|----------------------|--|--------------|------------------|--|------------------|-----------------------|--------|-------|
| Acquisition Time (sec) |  | 1.9818       | Comment              |  | single_pulse | Date             |  |                  |                       |        |       |
| Date Stamp             |  |              |                      |  |              |                  |  |                  |                       |        |       |
| File Name              |  |              |                      |  |              |                  |  | Frequency (MHz)  |                       | 600.17 |       |
| Nucleus                |  | 1H           | Number of Transients |  | 8            | Origin           |  | ECA 600          | Original Points Count |        | 32768 |
| Owner                  |  | CKP          | Points Count         |  | 32768        | Pulse Sequence   |  | single_pulse.ex2 | Receiver Gain         |        | 24.00 |
| Solvent                |  | CHLOROFORM-d | Spectrum Offset (Hz) |  | 5392.4614    | Sweep Width (Hz) |  | 16534.39         |                       |        |       |

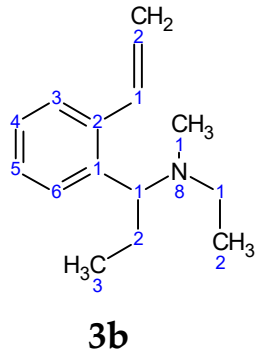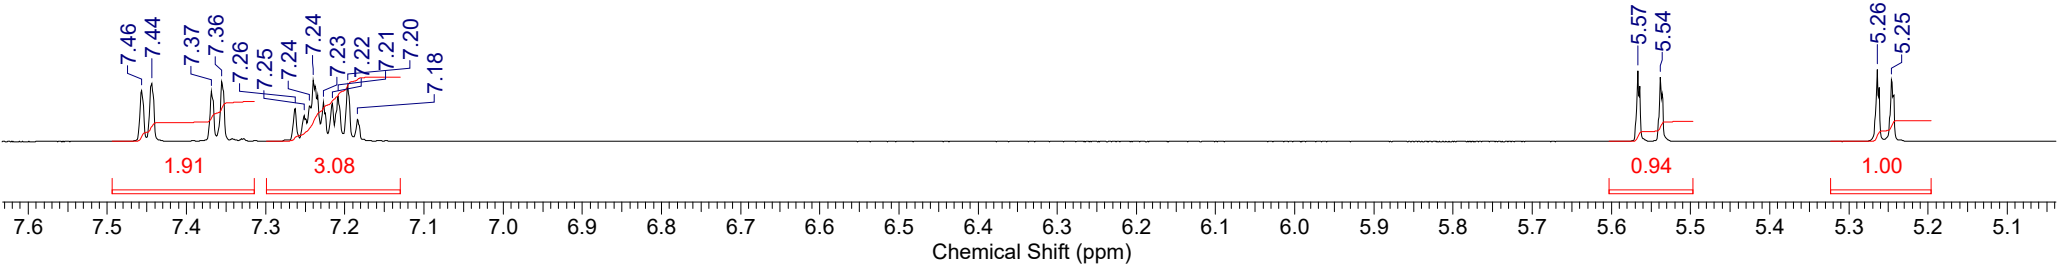



# $^1\text{H}$ NMR spectrum of compound **3b**

|                        |              |                      |              |                       |                  |
|------------------------|--------------|----------------------|--------------|-----------------------|------------------|
| Acquisition Time (sec) | 1.9818       | Comment              | single pulse | Date                  |                  |
| Date Stamp             |              |                      |              |                       |                  |
| File Name              |              |                      |              | Frequency (MHz)       | 600.17           |
| Nucleus                | $^1\text{H}$ | Number of Transients | 8            | Origin                | ECA 600          |
| Owner                  | CKP          | Points Count         | 32768        | Pulse Sequence        | single_pulse.ex2 |
| Solvent                | CHLOROFORM-d | Spectrum Offset (Hz) | 5392.4614    | Sweep Width (Hz)      | 16534.39         |
|                        |              |                      |              | Original Points Count | 32768            |
|                        |              |                      |              | Receiver Gain         | 24.00            |



**3b**

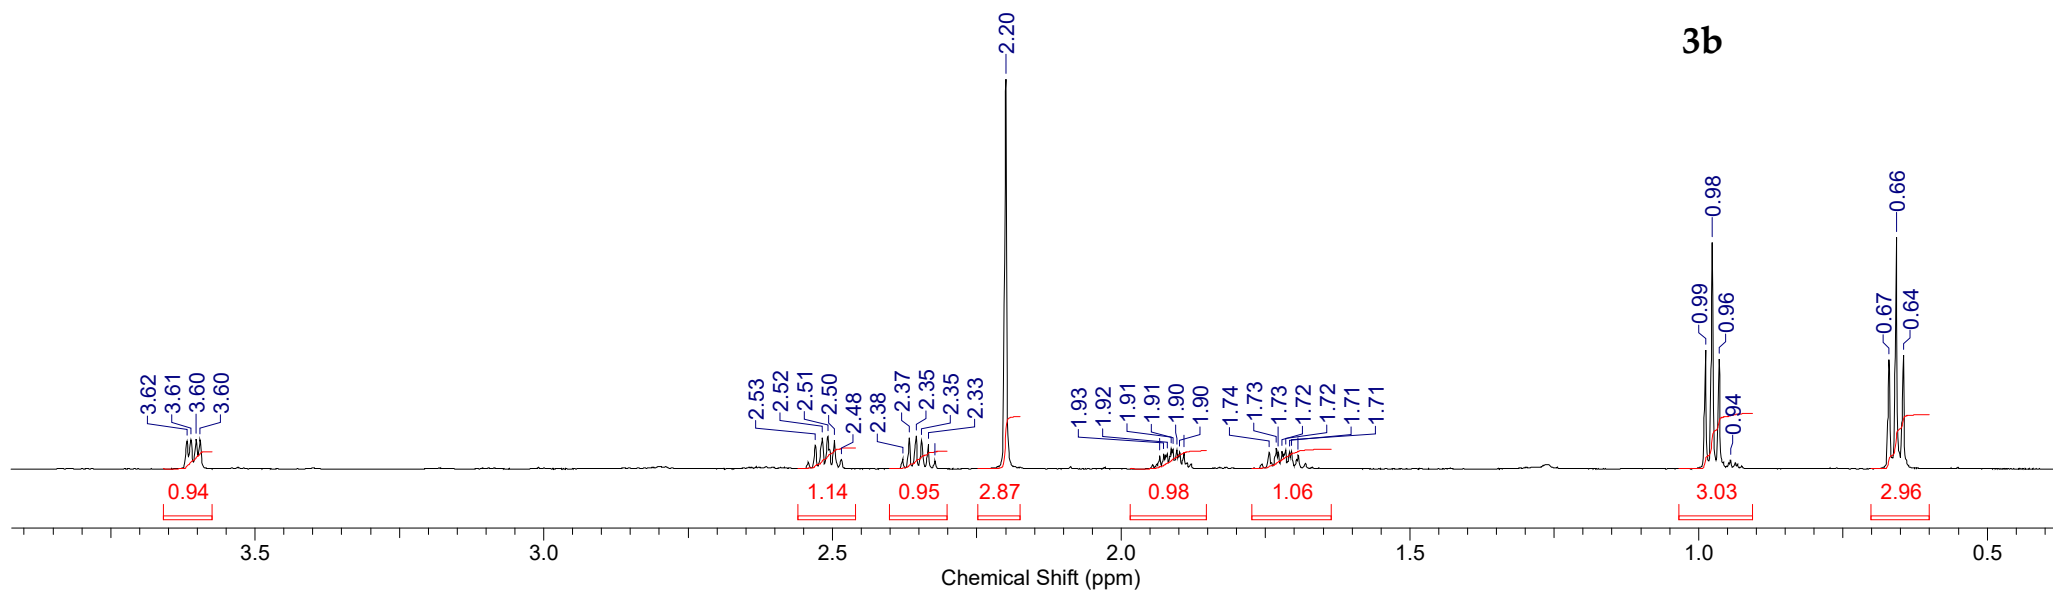

# $^{13}\text{C}$ NMR spectrum of compound **3b**

|                        |                 |                      |                                  |                  |                  |
|------------------------|-----------------|----------------------|----------------------------------|------------------|------------------|
| Acquisition Time (sec) | 0.6921          | Comment              | single pulse decoupled gated NOE |                  | Date             |
| Date Stamp             |                 |                      |                                  |                  |                  |
| File Name              |                 |                      | Frequency (MHz)                  |                  |                  |
| Nucleus                | $^{13}\text{C}$ | Number of Transients | 1000                             | Origin           | ECA 600          |
| Owner                  | CKP             | Points Count         | 32768                            | Pulse Sequence   | single pulse dec |
| Solvent                | CHLOROFORM-d    | Spectrum Offset (Hz) | 15091.3428                       | Sweep Width (Hz) | 47348.49         |
|                        |                 |                      | Original Points Count            |                  |                  |
|                        |                 |                      | Receiver Gain                    |                  |                  |

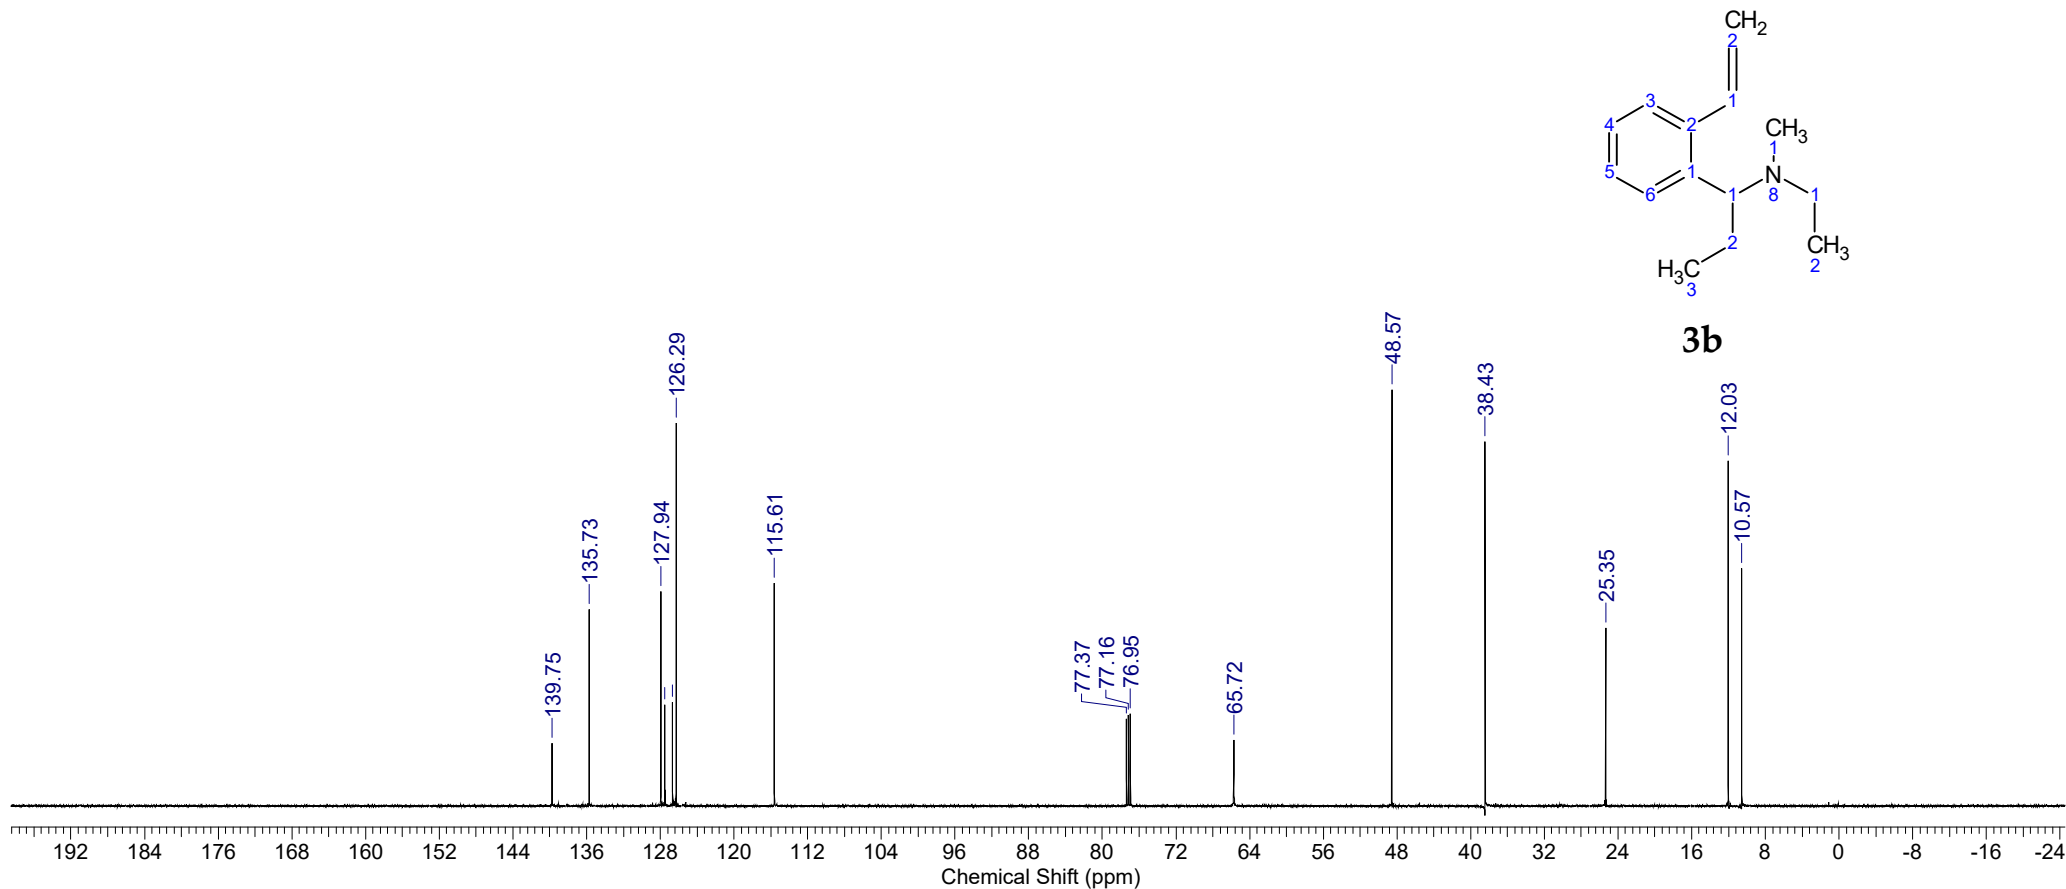

# $^{13}\text{C}$ NMR spectrum of compound **3b**

|                        |                 |                      |                                  |                  |                  |
|------------------------|-----------------|----------------------|----------------------------------|------------------|------------------|
| Acquisition Time (sec) | 0.6921          | Comment              | single pulse decoupled gated NOE |                  | Date             |
| Date Stamp             |                 |                      |                                  |                  |                  |
| File Name              |                 |                      | Frequency (MHz)                  |                  |                  |
| Nucleus                | $^{13}\text{C}$ | Number of Transients | 1000                             | Origin           | ECA 600          |
| Owner                  | CKP             | Points Count         | 32768                            | Pulse Sequence   | single pulse dec |
| Solvent                | CHLOROFORM-d    | Spectrum Offset (Hz) | 15091.3428                       | Sweep Width (Hz) | 47348.49         |
|                        |                 |                      | Original Points Count            |                  |                  |
|                        |                 |                      | Receiver Gain                    |                  |                  |

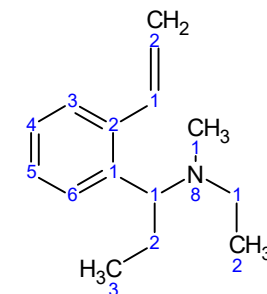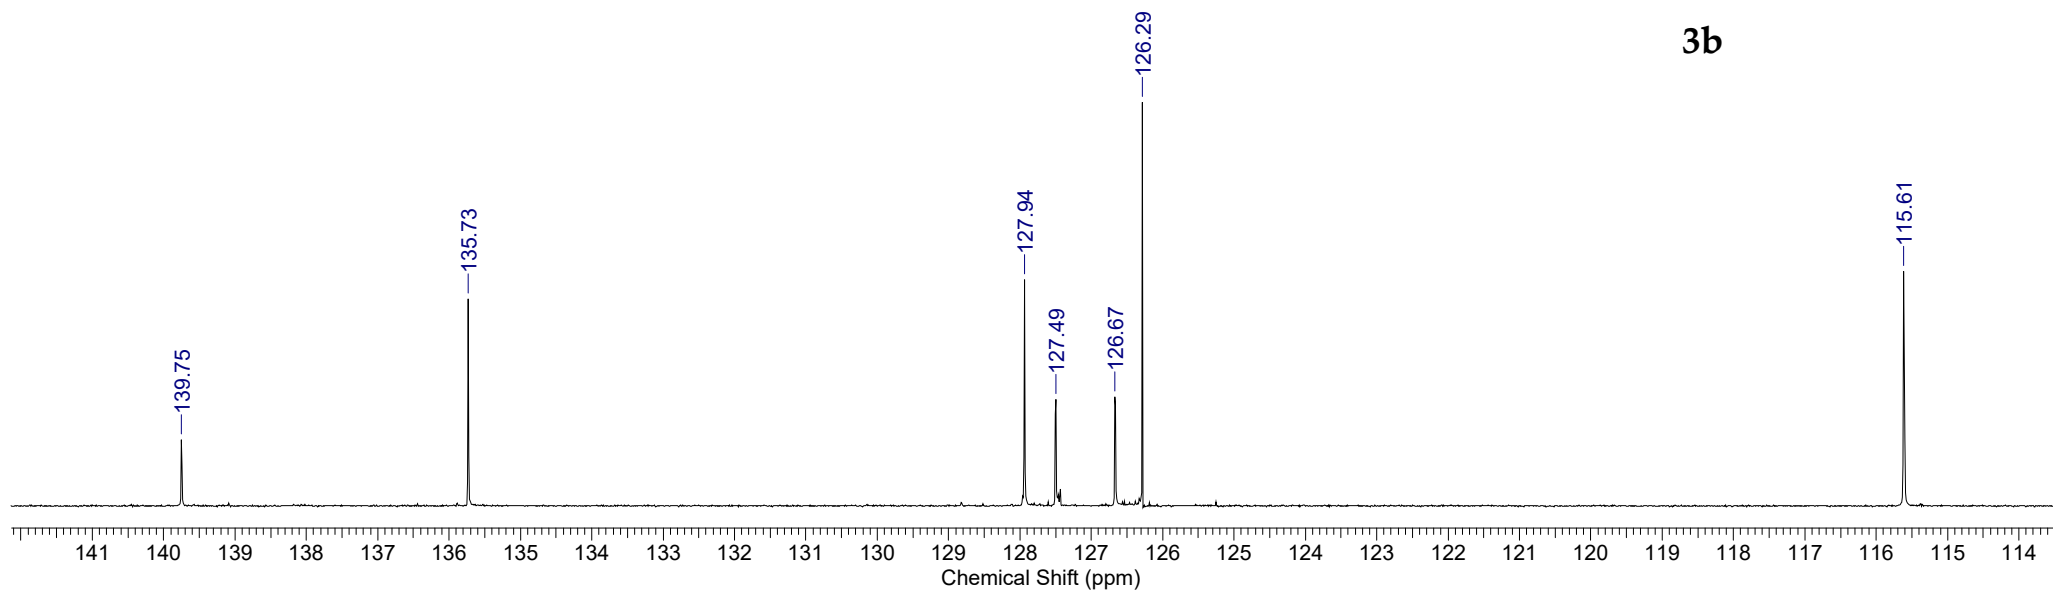

# $^{13}\text{C}$ NMR spectrum of compound **3b**

|                        |                 |                      |                                  |                  |                  |
|------------------------|-----------------|----------------------|----------------------------------|------------------|------------------|
| Acquisition Time (sec) | 0.6921          | Comment              | single pulse decoupled gated NOE |                  | Date             |
| Date Stamp             |                 |                      |                                  |                  |                  |
| File Name              |                 |                      | Frequency (MHz)                  |                  |                  |
| Nucleus                | $^{13}\text{C}$ | Number of Transients | 1000                             | Origin           | ECA 600          |
| Owner                  | CKP             | Points Count         | 32768                            | Pulse Sequence   | single pulse dec |
| Solvent                | CHLOROFORM-d    | Spectrum Offset (Hz) | 14920.4023                       | Sweep Width (Hz) | 47348.49         |
|                        |                 |                      | Original Points Count            |                  |                  |
|                        |                 |                      | Receiver Gain                    |                  |                  |

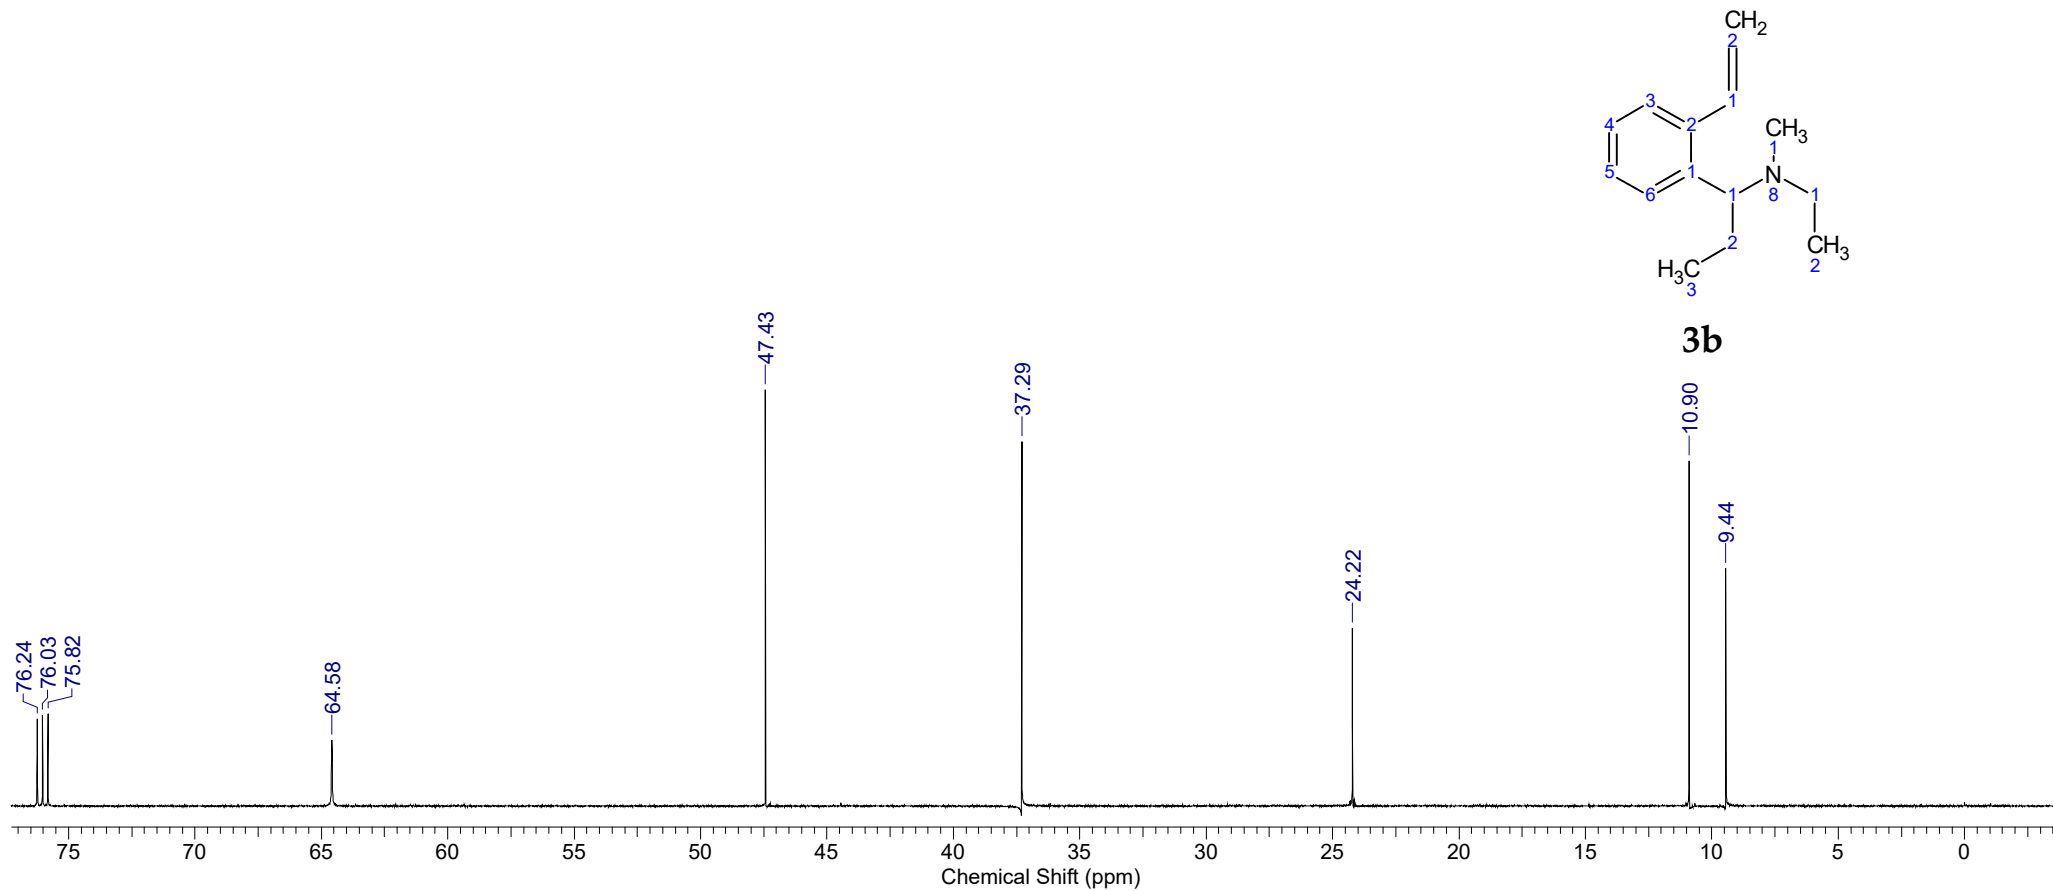

IR spectrum of compound **3b**

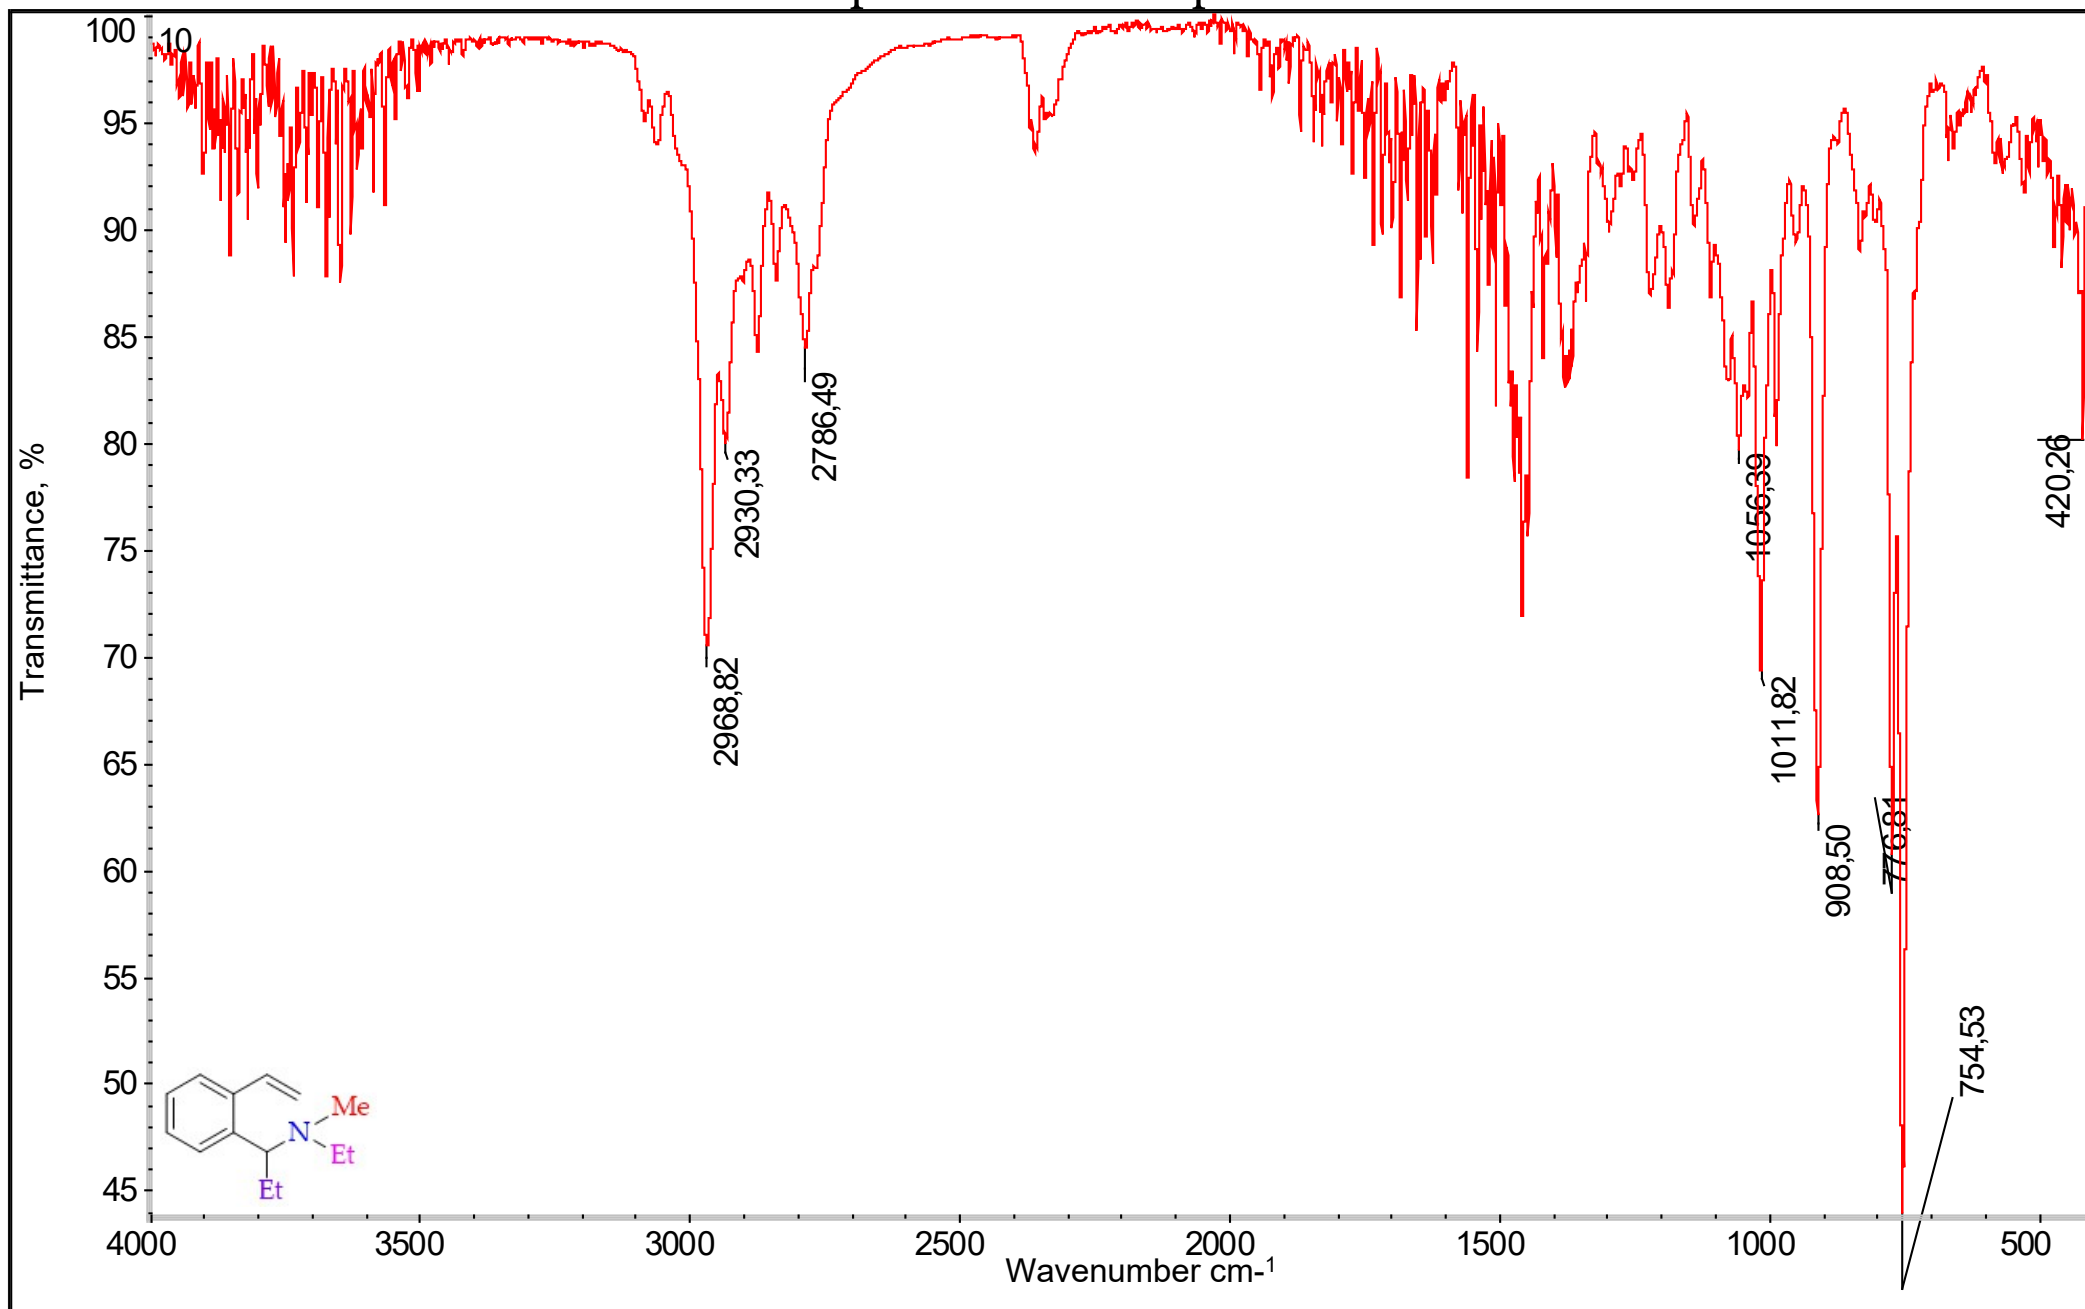

# HRMS (MALDI-TOF) spectrum of compound **3b**

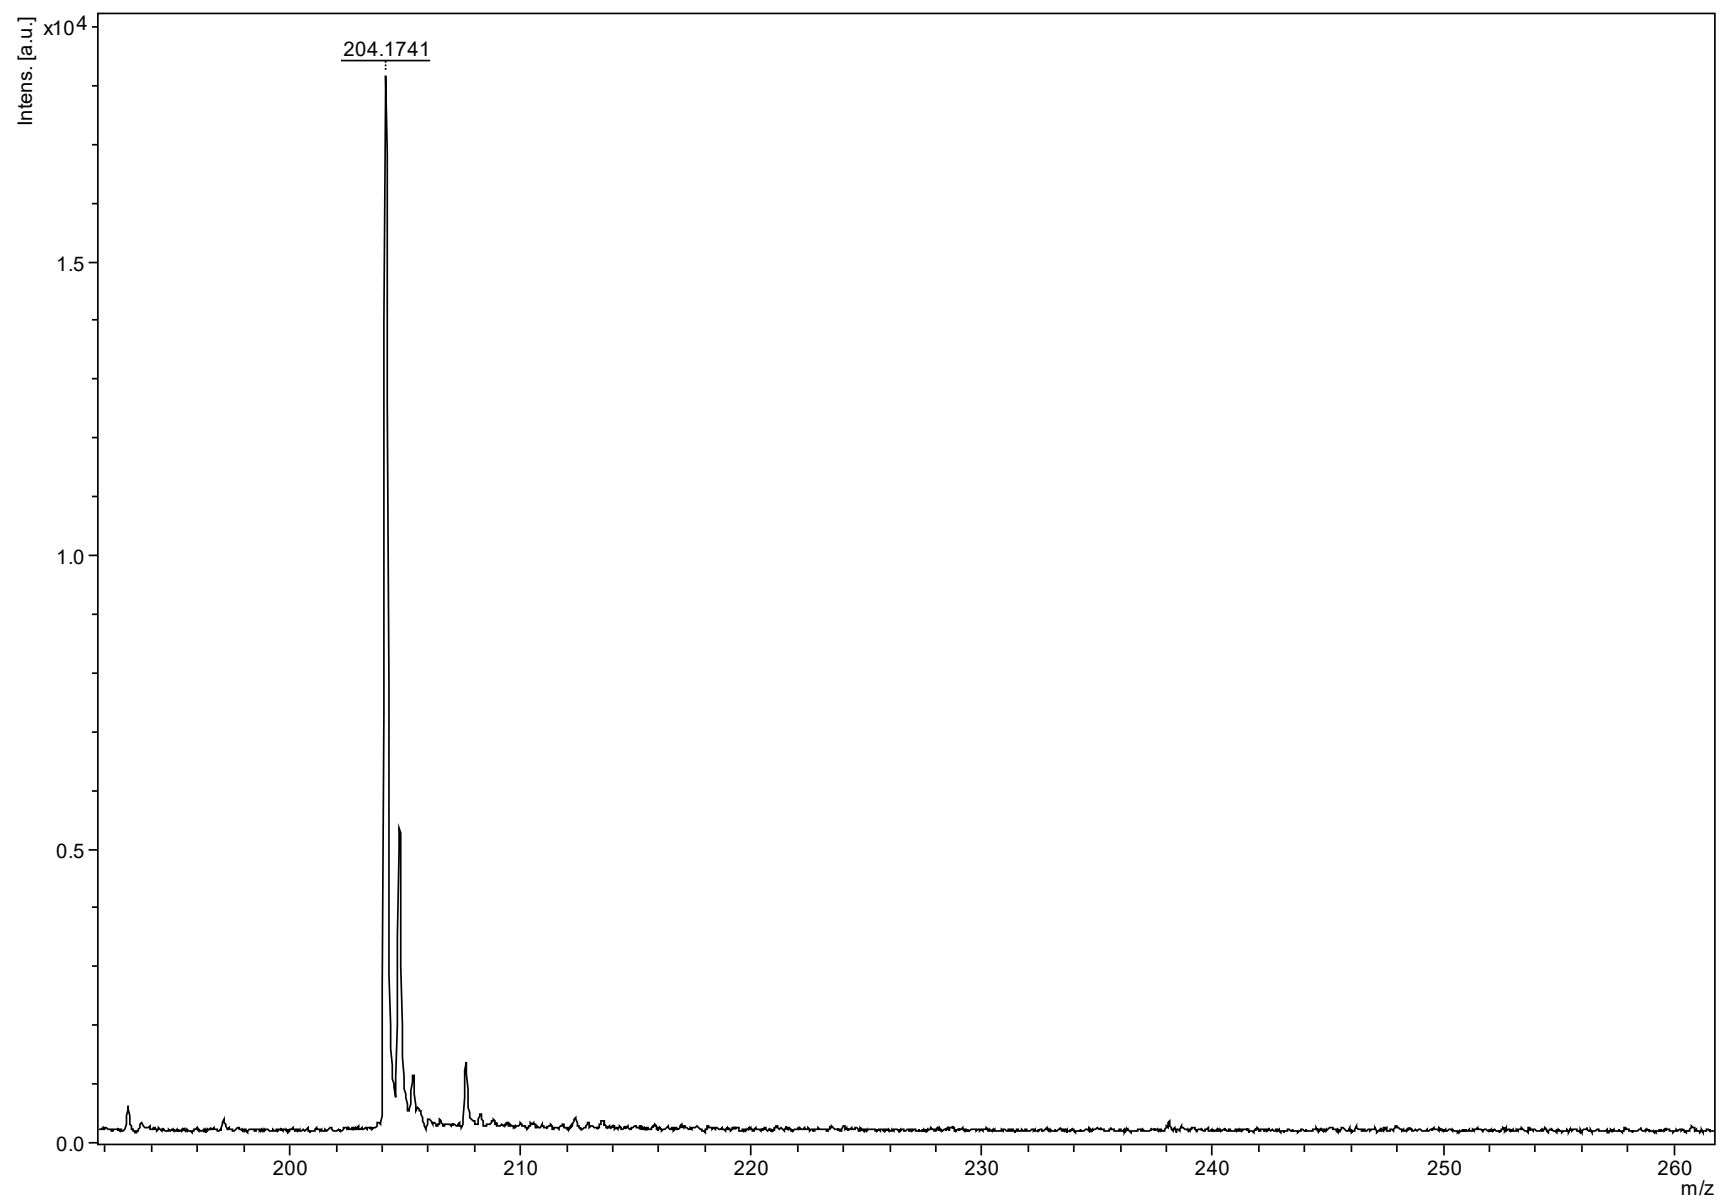

# $^1\text{H}$ NMR spectrum of compound **3c**

|                        |        |         |              |                      |           |
|------------------------|--------|---------|--------------|----------------------|-----------|
| Acquisition Time (sec) | 1.9818 | Comment | single pulse | Date                 |           |
| Date Stamp             |        |         |              | File Name            |           |
| Frequency (MHz)        | 600.17 | Nucleus | $^1\text{H}$ | Number of Transients | 8         |
| Original Points Count  | 32768  | Owner   | CKP          | Points Count         | 32768     |
| Receiver Gain          | 20.00  | Solvent | CHLOROFORM-d | Spectrum Offset (Hz) | 5388.4248 |
|                        |        |         |              | Sweep Width (Hz)     | 16534.39  |

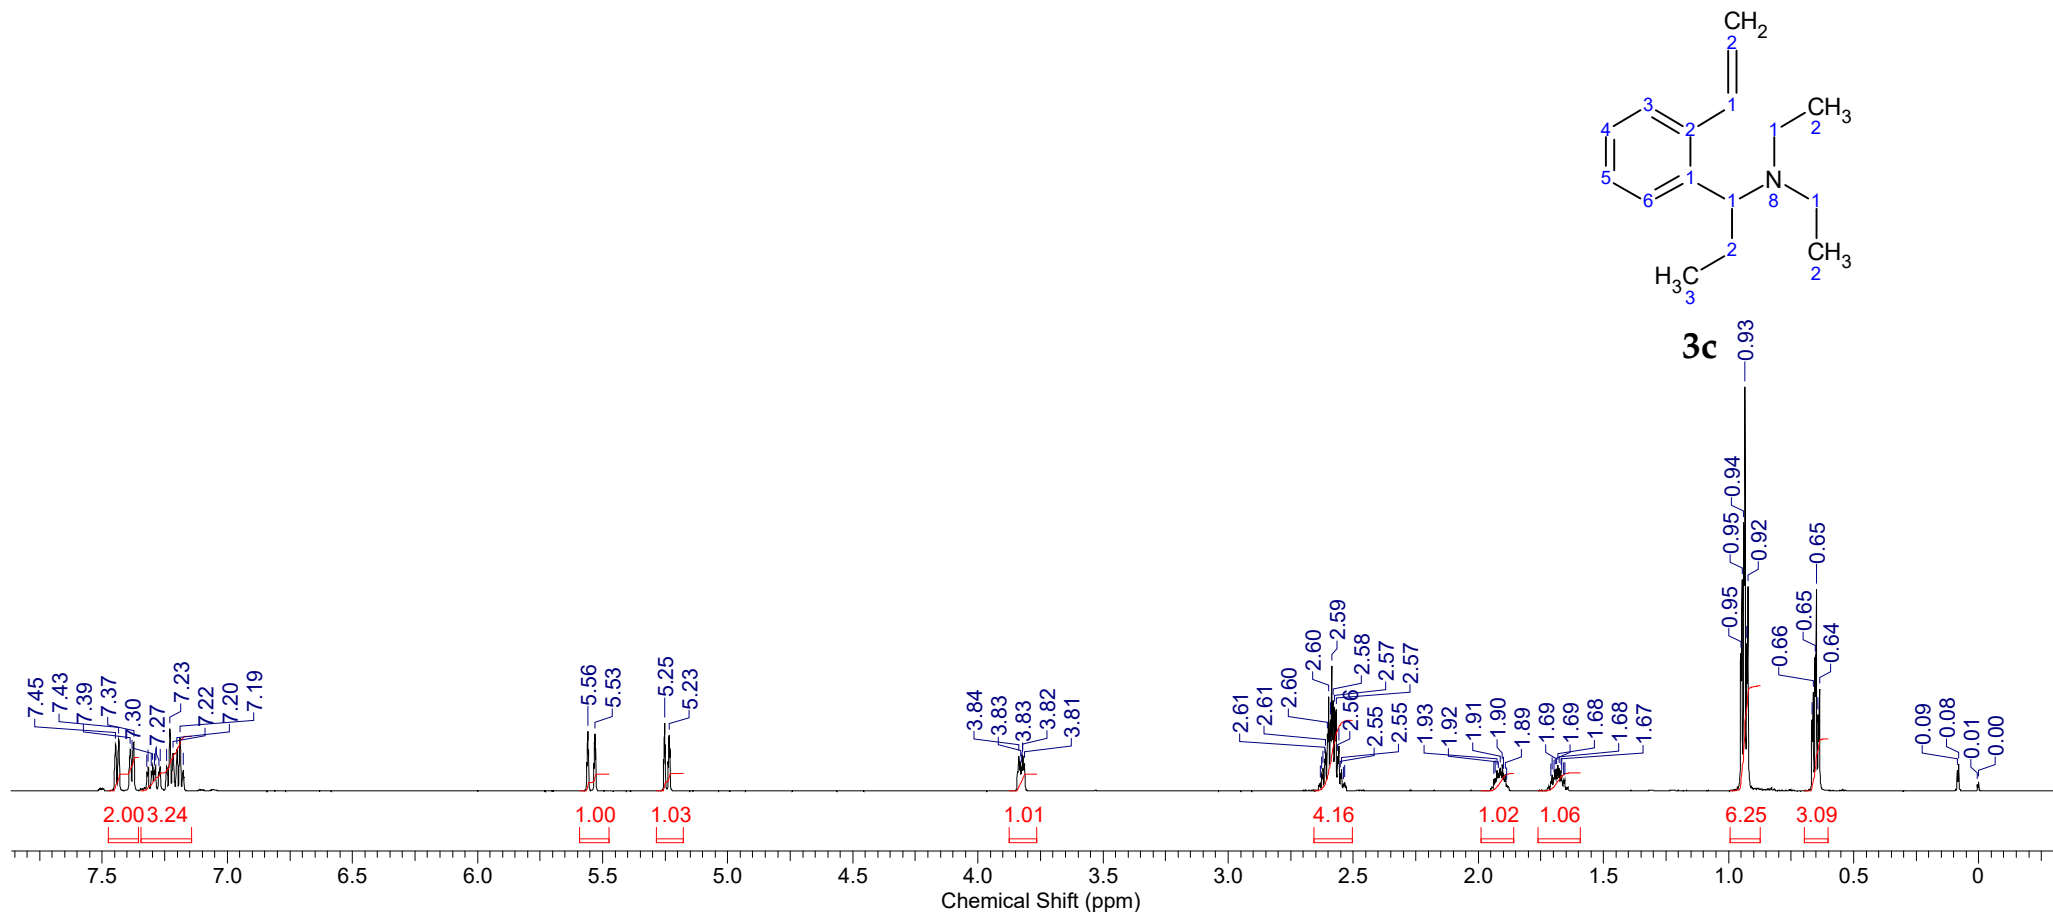

# $^1\text{H}$ NMR spectrum of compound **3c**

|                        |        |         |              |                      |           |
|------------------------|--------|---------|--------------|----------------------|-----------|
| Acquisition Time (sec) | 1.9818 | Comment | single pulse | Date                 |           |
| Date Stamp             |        |         |              | File Name            |           |
| Frequency (MHz)        | 600.17 | Nucleus | $^1\text{H}$ | Number of Transients | 8         |
| Original Points Count  | 32768  | Owner   | CKP          | Points Count         | 32768     |
| Receiver Gain          | 20.00  | Solvent | CHLOROFORM-d | Spectrum Offset (Hz) | 5388.4248 |
|                        |        |         |              | Sweep Width (Hz)     | 16534.39  |

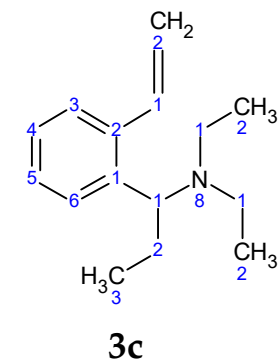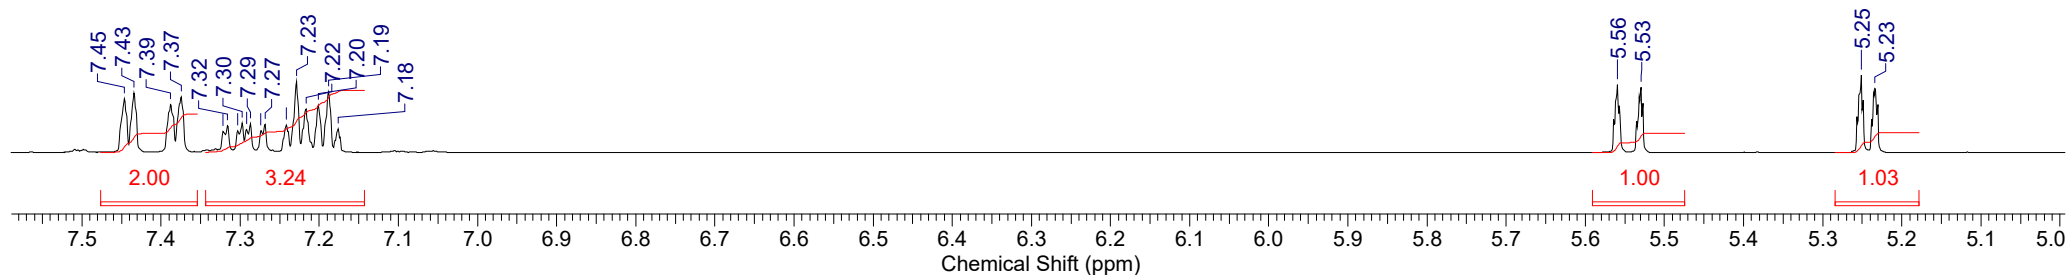



# <sup>1</sup>H NMR spectrum of compound 3c

|                        |        |         |              |                      |           |
|------------------------|--------|---------|--------------|----------------------|-----------|
| Acquisition Time (sec) | 1.9818 | Comment | single pulse | Date                 |           |
| Date Stamp             |        |         |              | File Name            |           |
| Frequency (MHz)        | 600.17 | Nucleus | 1H           | Number of Transients | 8         |
| Original Points Count  | 32768  | Owner   | CKP          | Points Count         | 32768     |
| Receiver Gain          | 20.00  | Solvent | CHLOROFORM-d | Spectrum Offset (Hz) | 5388.4248 |
|                        |        |         |              | Sweep Width (Hz)     | 16534.39  |

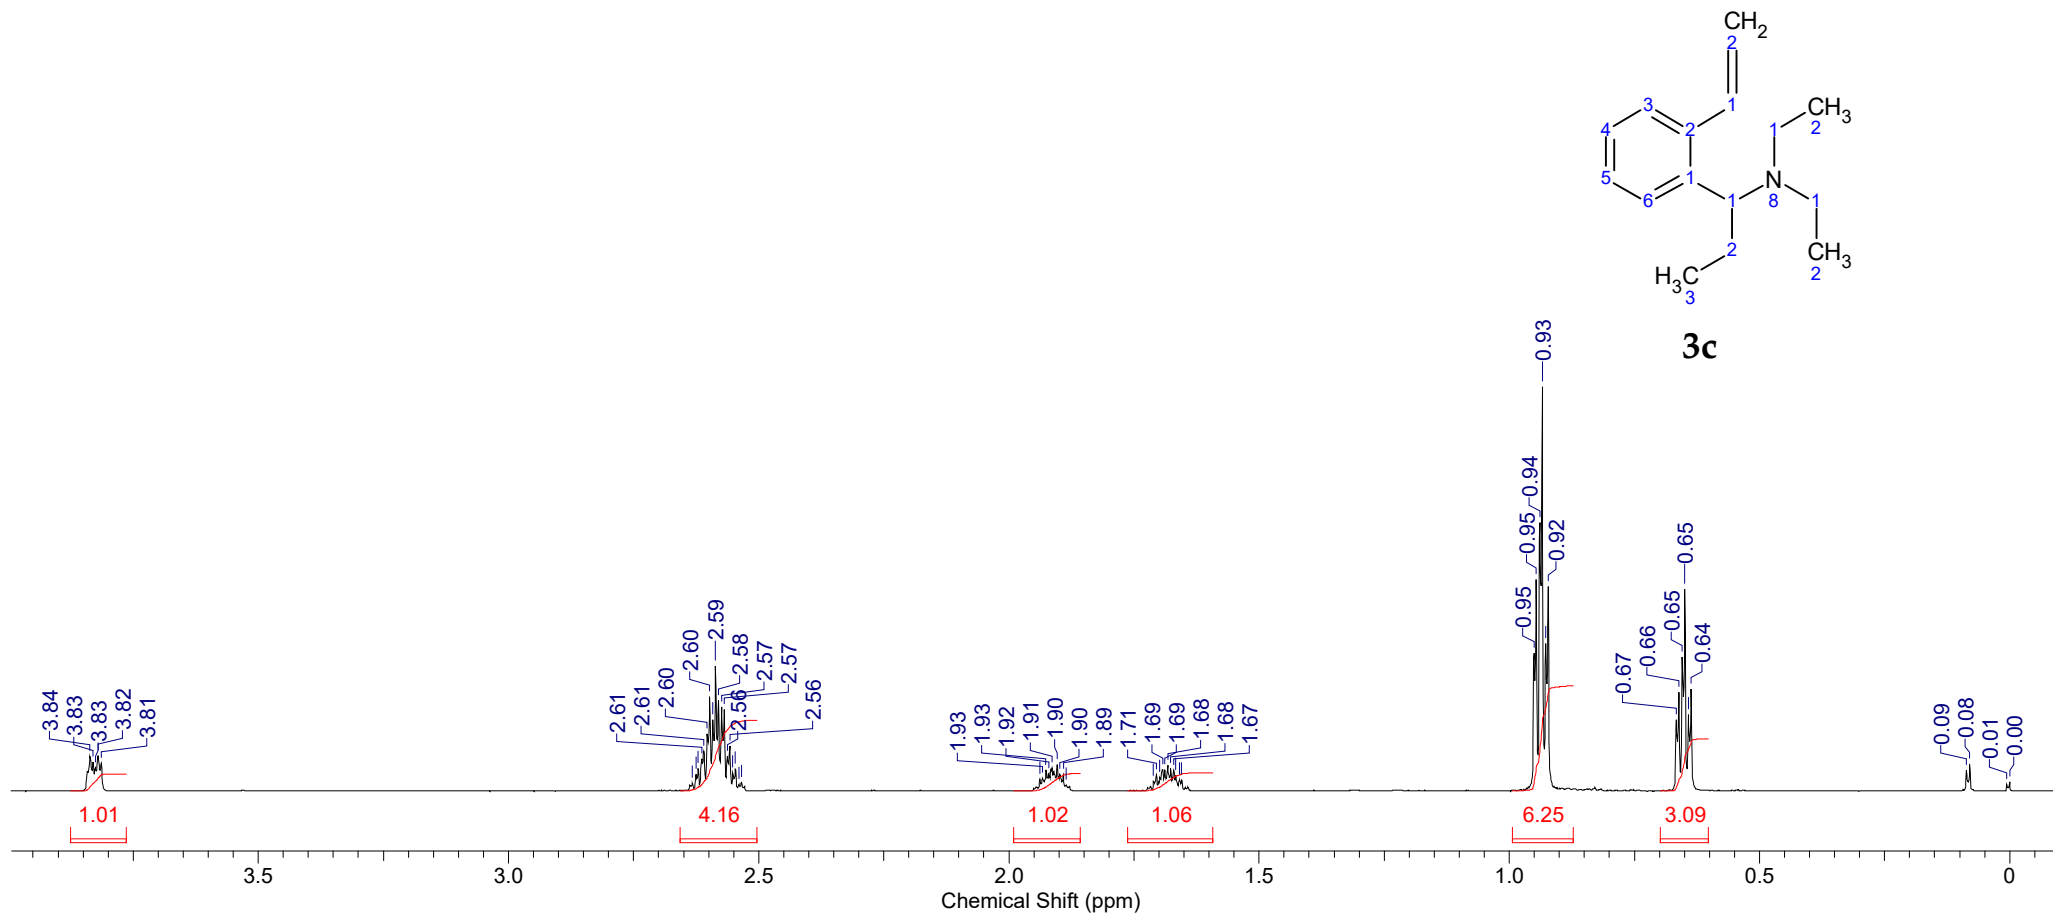

# $^{13}\text{C}$ NMR spectrum of compound 3c

|                                      |                                        |                                                 |                                        |                                    |  |
|--------------------------------------|----------------------------------------|-------------------------------------------------|----------------------------------------|------------------------------------|--|
| <b>Acquisition Time (sec)</b> 0.6921 |                                        | <b>Comment</b> single pulse decoupled gated NOE |                                        | <b>Date</b>                        |  |
| <b>Date Stamp</b>                    |                                        |                                                 |                                        |                                    |  |
| <b>File Name</b>                     |                                        |                                                 |                                        | <b>Frequency (MHz)</b> 150.91      |  |
| <b>Nucleus</b> 13C                   | <b>Number of Transients</b> 1000       |                                                 | <b>Origin</b> ECA 600                  | <b>Original Points Count</b> 32768 |  |
| <b>Owner</b> CKP                     | <b>Points Count</b> 32768              |                                                 | <b>Pulse Sequence</b> single pulse dec | <b>Receiver Gain</b> 56.00         |  |
| <b>Solvent</b> CHLOROFORM-d          | <b>Spectrum Offset (Hz)</b> 14918.9570 |                                                 | <b>Sweep Width (Hz)</b> 47348.49       |                                    |  |

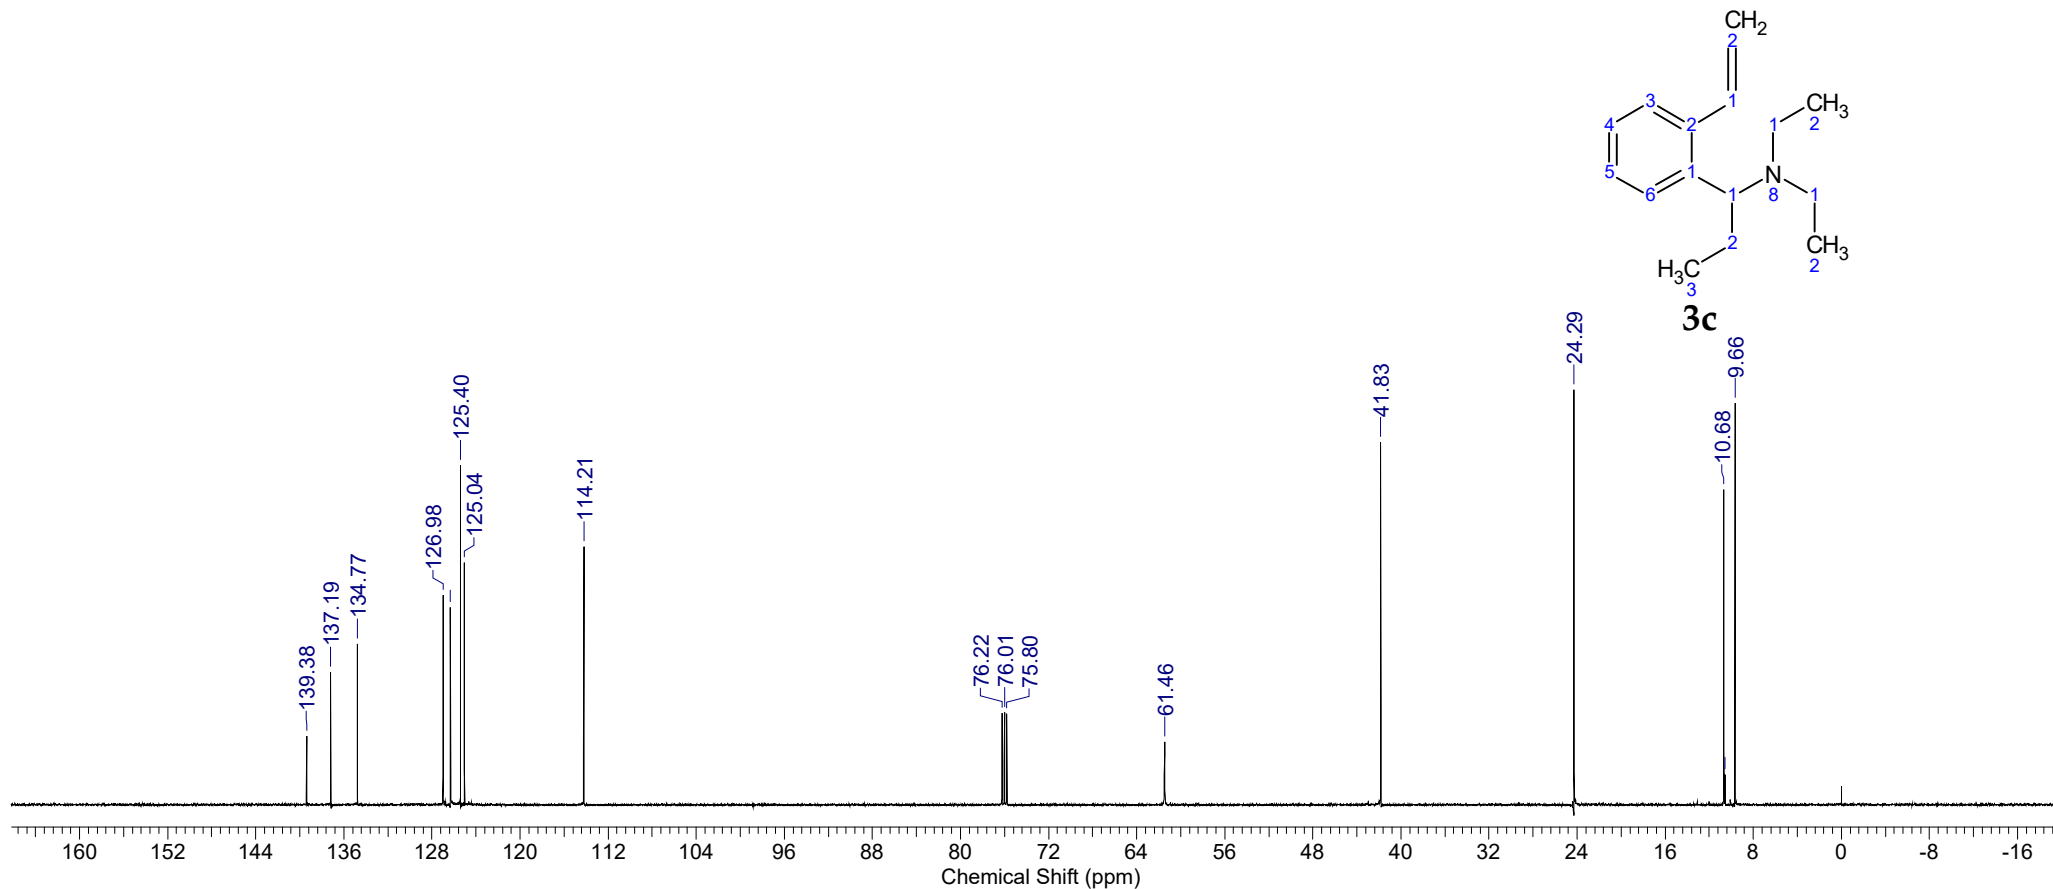

# $^{13}\text{C}$ NMR spectrum of compound 3c

|                                      |                                        |                                                 |  |                                    |  |
|--------------------------------------|----------------------------------------|-------------------------------------------------|--|------------------------------------|--|
| <b>Acquisition Time (sec)</b> 0.6921 |                                        | <b>Comment</b> single pulse decoupled gated NOE |  | <b>Date</b>                        |  |
| <b>Date Stamp</b>                    |                                        |                                                 |  |                                    |  |
| <b>File Name</b>                     |                                        |                                                 |  | <b>Frequency (MHz)</b> 150.91      |  |
| <b>Nucleus</b> 13C                   | <b>Number of Transients</b> 1000       | <b>Origin</b> ECA 600                           |  | <b>Original Points Count</b> 32768 |  |
| <b>Owner</b> CKP                     | <b>Points Count</b> 32768              | <b>Pulse Sequence</b> single pulse dec          |  | <b>Receiver Gain</b> 56.00         |  |
| <b>Solvent</b> CHLOROFORM-d          | <b>Spectrum Offset (Hz)</b> 14918.9570 | <b>Sweep Width (Hz)</b> 47348.49                |  |                                    |  |

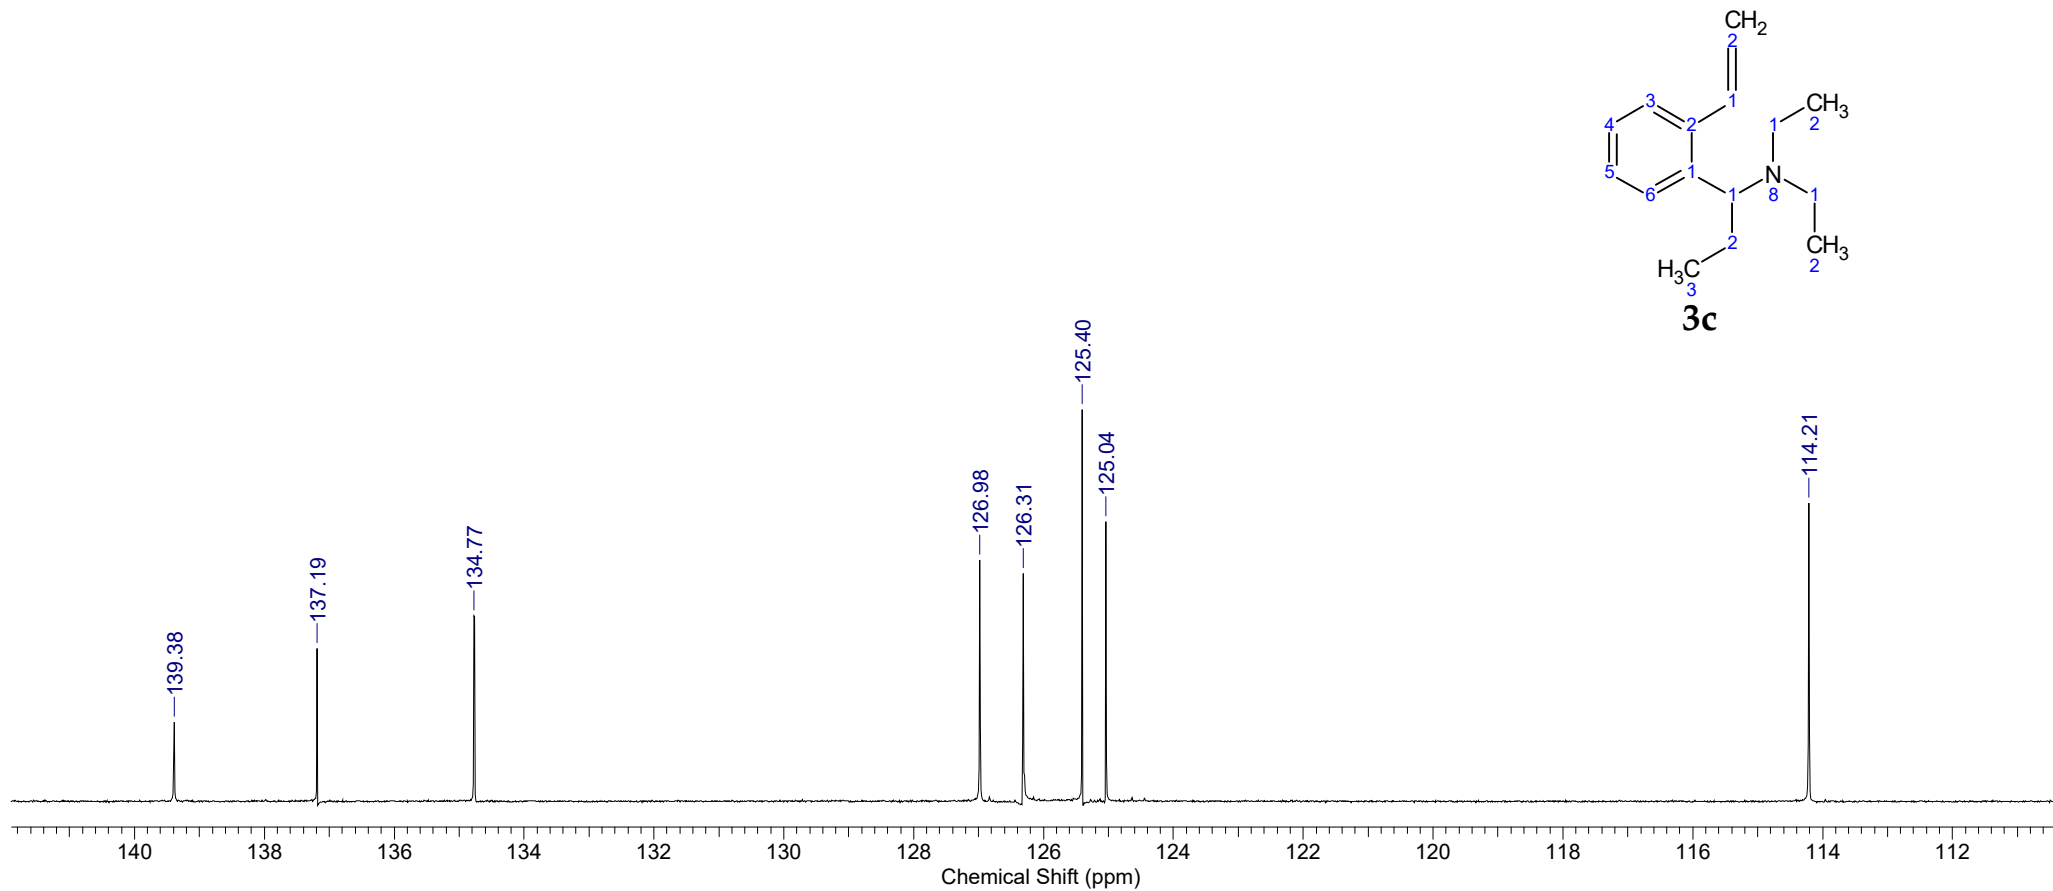

# $^{13}\text{C}$ NMR spectrum of compound 3c

|                                      |                                        |                                                 |                                        |                                    |  |
|--------------------------------------|----------------------------------------|-------------------------------------------------|----------------------------------------|------------------------------------|--|
| <b>Acquisition Time (sec)</b> 0.6921 |                                        | <b>Comment</b> single pulse decoupled gated NOE |                                        | <b>Date</b>                        |  |
| <b>Date Stamp</b>                    |                                        |                                                 |                                        |                                    |  |
| <b>File Name</b>                     |                                        |                                                 |                                        | <b>Frequency (MHz)</b> 150.91      |  |
| <b>Nucleus</b> 13C                   | <b>Number of Transients</b> 1000       |                                                 | <b>Origin</b> ECA 600                  | <b>Original Points Count</b> 32768 |  |
| <b>Owner</b> CKP                     | <b>Points Count</b> 32768              |                                                 | <b>Pulse Sequence</b> single pulse dec | <b>Receiver Gain</b> 56.00         |  |
| <b>Solvent</b> CHLOROFORM-d          | <b>Spectrum Offset (Hz)</b> 14918.9570 |                                                 | <b>Sweep Width (Hz)</b> 47348.49       |                                    |  |

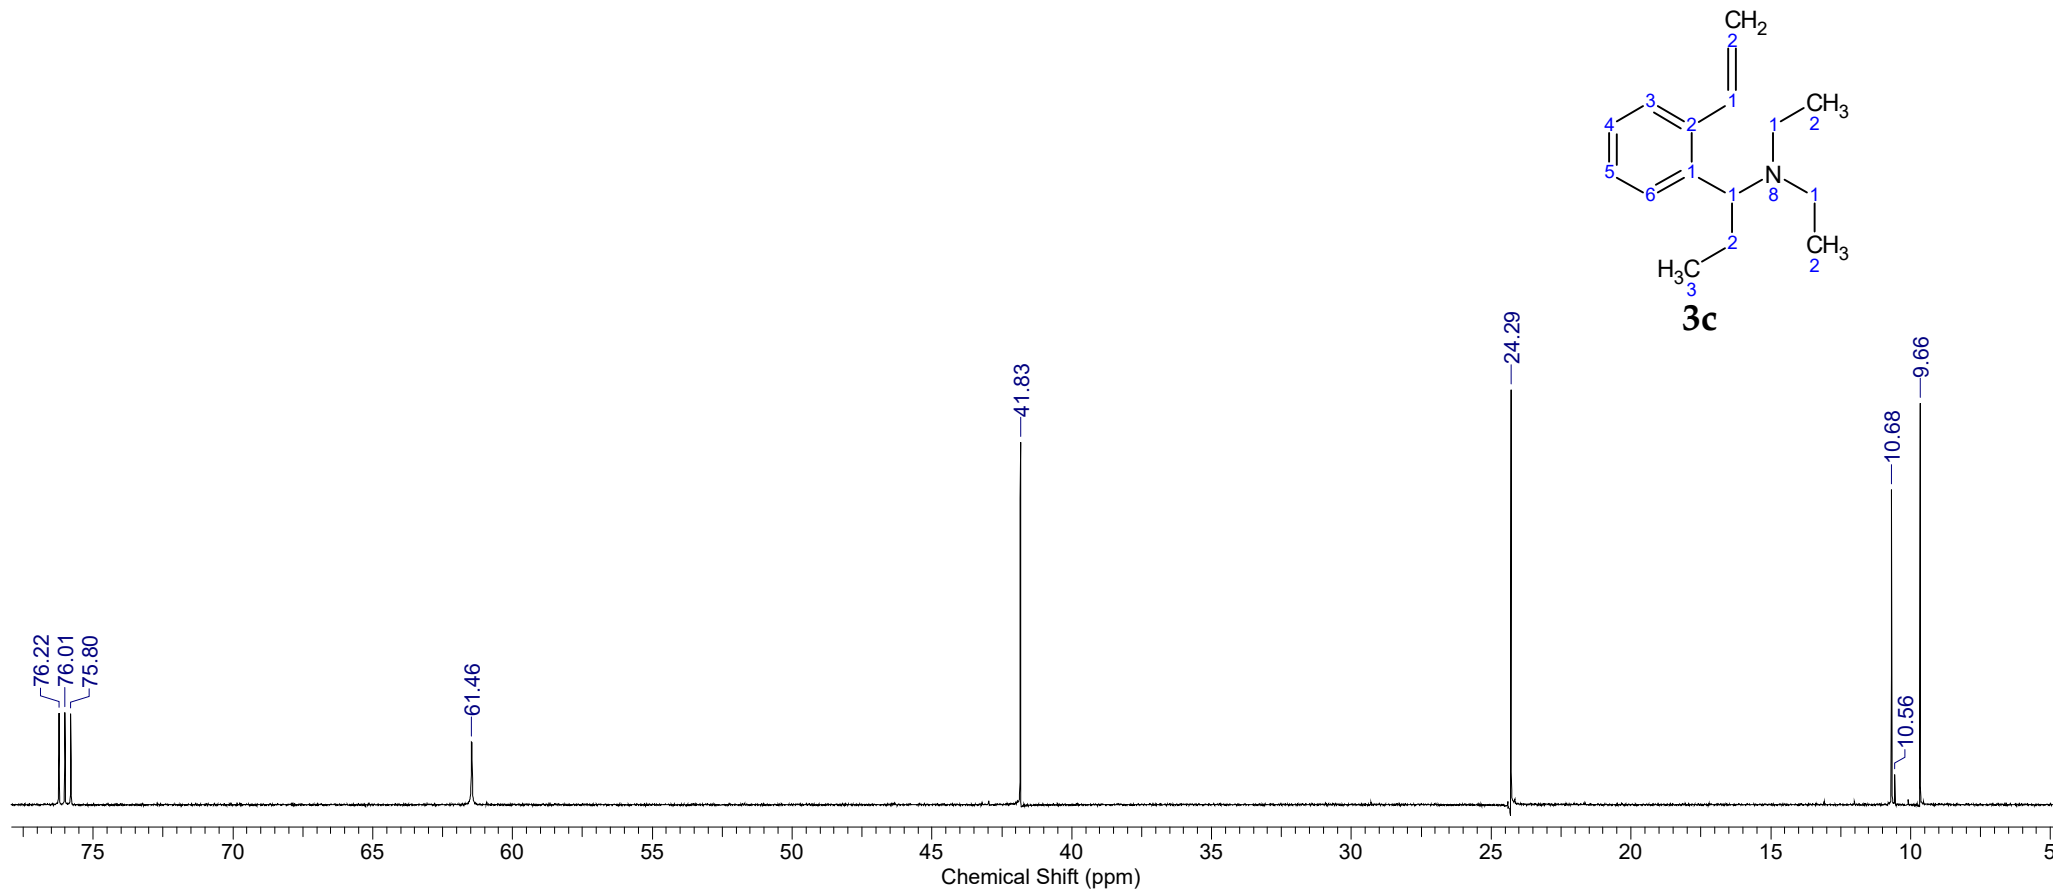

IR spectrum of compound 3c

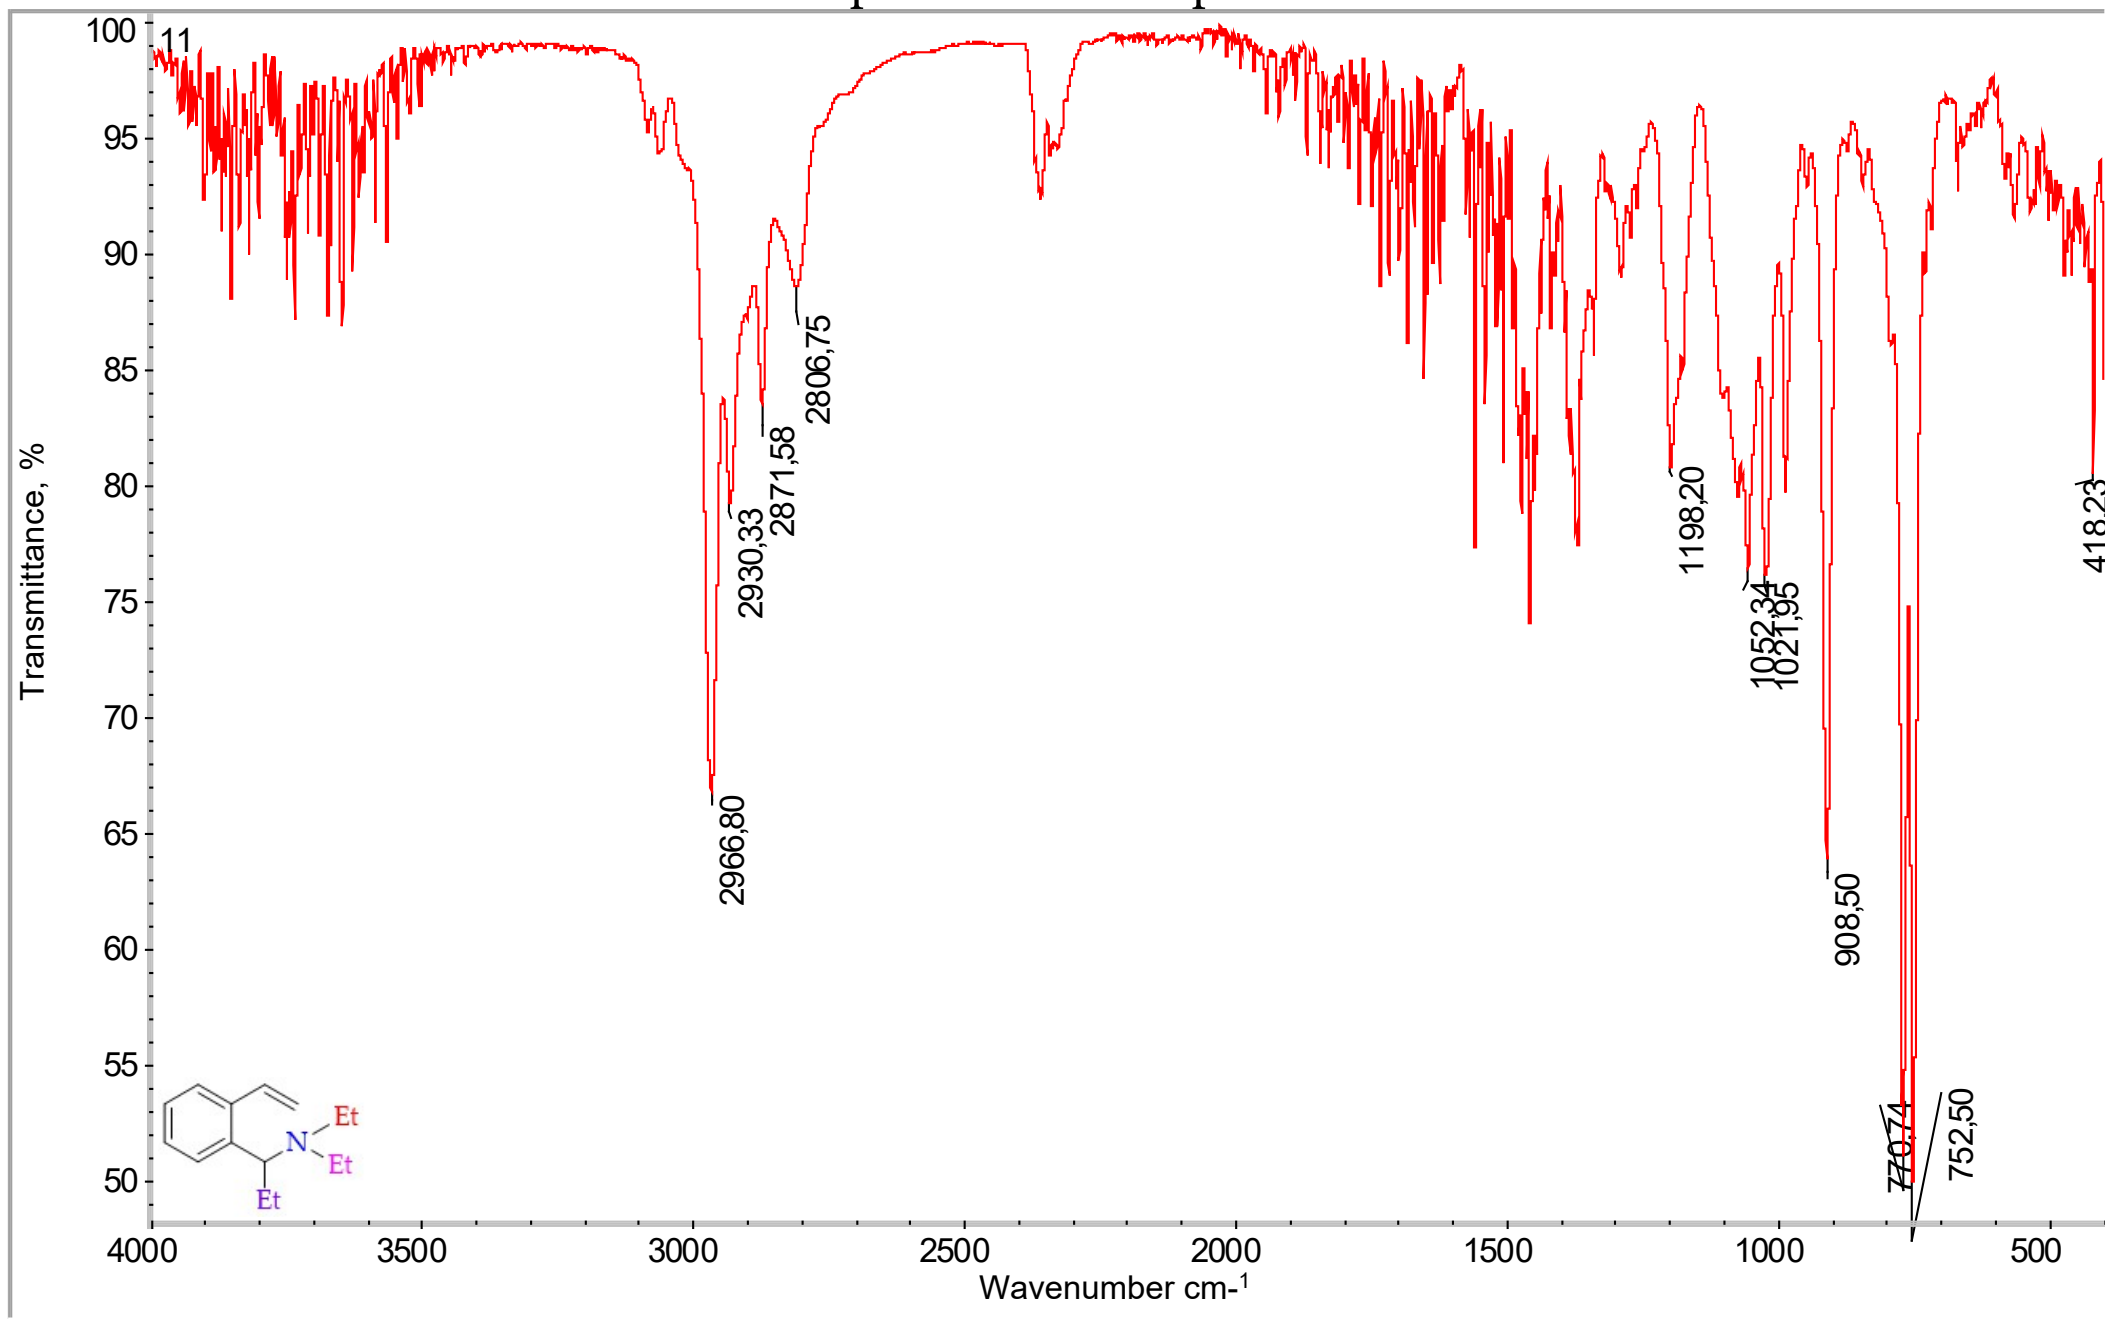

# HRMS (MALDI-TOF) spectrum of compound **3c**

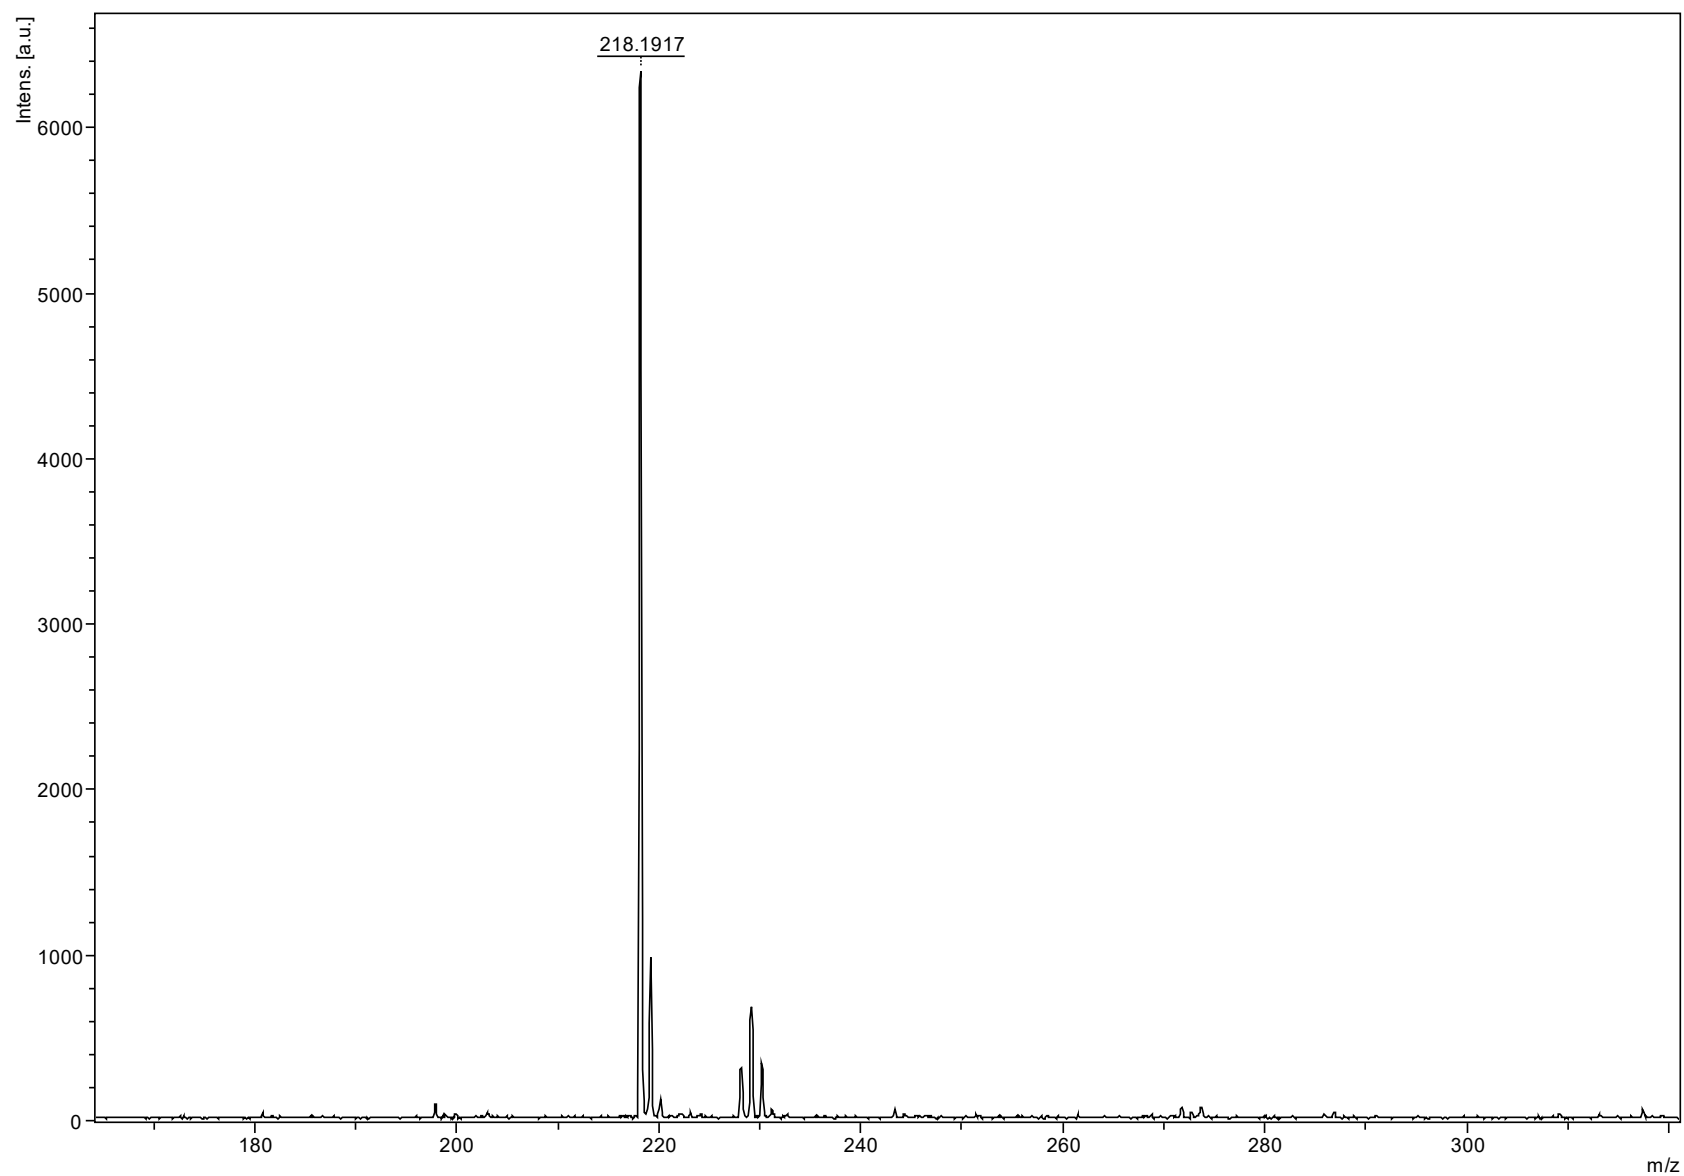

# <sup>1</sup>H NMR spectrum of compound 3d

|                               |                                |                      |                                 |                        |                             |
|-------------------------------|--------------------------------|----------------------|---------------------------------|------------------------|-----------------------------|
| Acquisition Time (sec) 1.9818 |                                | Comment single pulse |                                 | Date                   |                             |
| Date Stamp                    |                                |                      |                                 |                        |                             |
| File Name                     |                                |                      |                                 | Frequency (MHz) 600.17 |                             |
| Nucleus 1H                    | Number of Transients 8         |                      | Origin ECA 600                  |                        | Original Points Count 32768 |
| Owner CKP                     | Points Count 32768             |                      | Pulse Sequence single_pulse.ex2 |                        | Receiver Gain 28.00         |
| Solvent CHLOROFORM-d          | Spectrum Offset (Hz) 5401.5503 |                      | Sweep Width (Hz) 16534.39       |                        |                             |

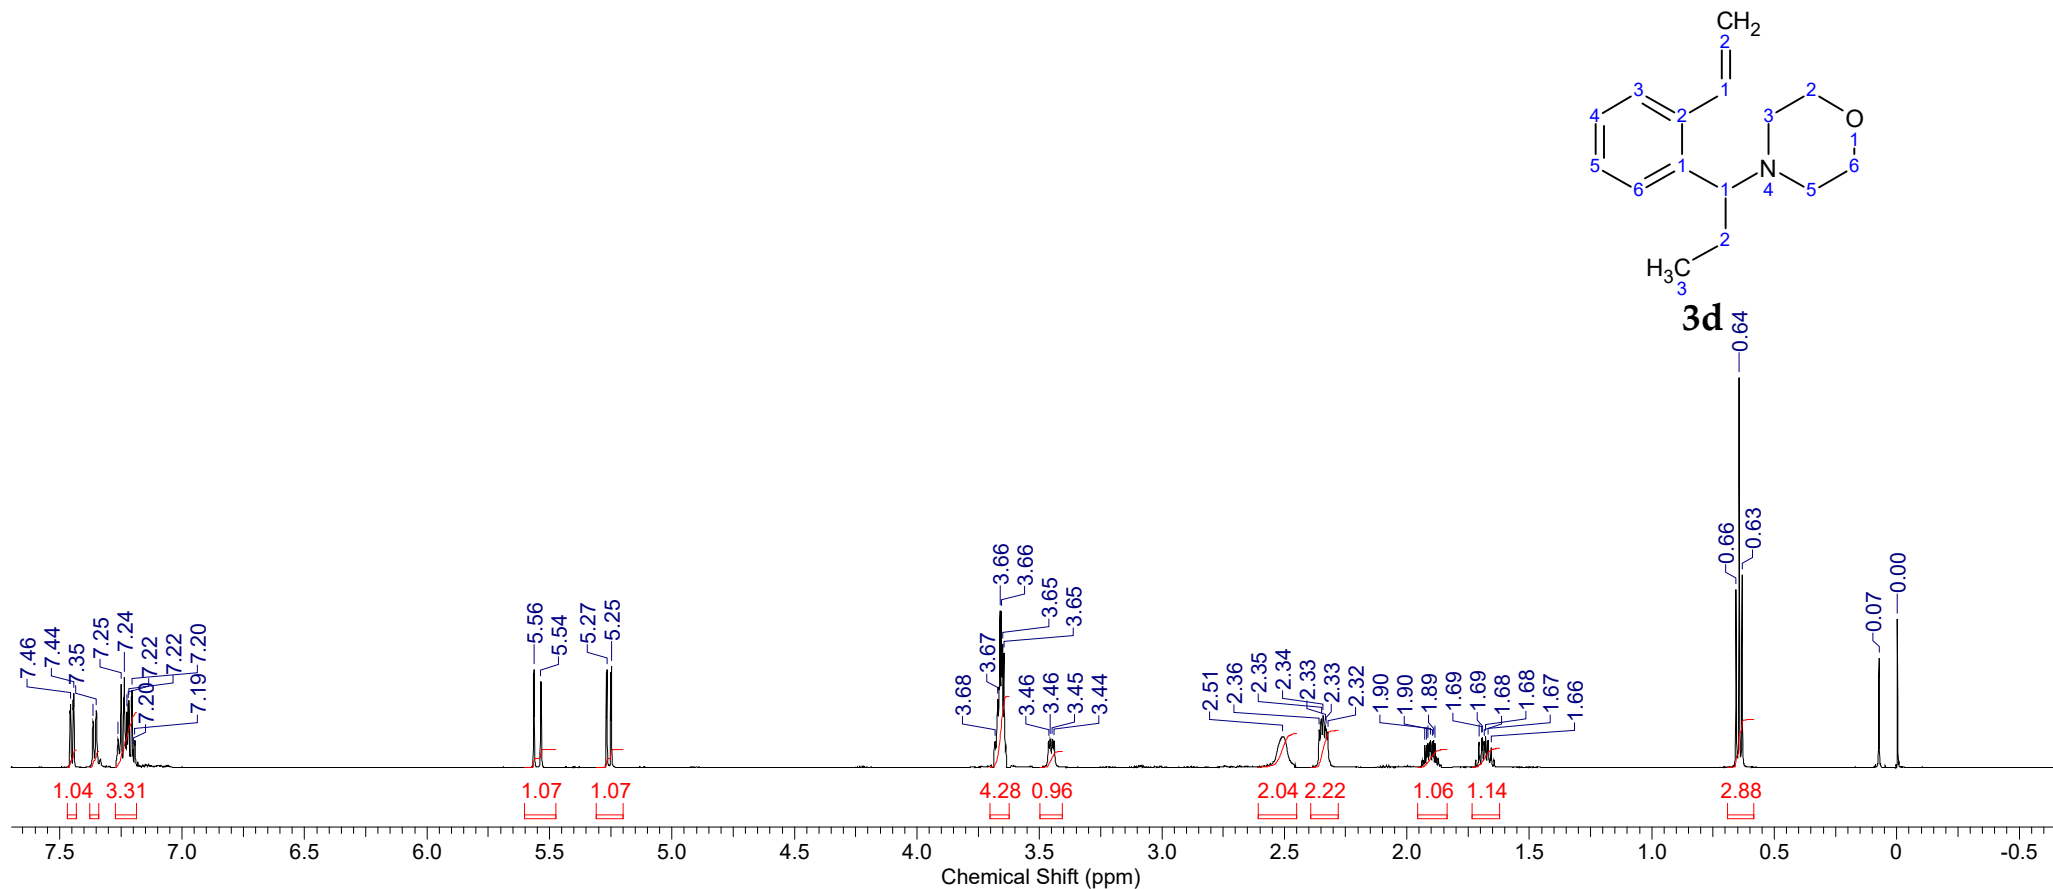

# <sup>1</sup>H NMR spectrum of compound 3d

|                                      |  |                                       |                                        |                                    |
|--------------------------------------|--|---------------------------------------|----------------------------------------|------------------------------------|
| <b>Acquisition Time (sec)</b> 1.9818 |  | <b>Comment</b> single pulse           | <b>Date</b>                            |                                    |
| <b>Date Stamp</b>                    |  |                                       |                                        |                                    |
| <b>File Name</b>                     |  |                                       | <b>Frequency (MHz)</b> 600.17          |                                    |
| <b>Nucleus</b> 1H                    |  | <b>Number of Transients</b> 8         | <b>Origin</b> ECA 600                  | <b>Original Points Count</b> 32768 |
| <b>Owner</b> CKP                     |  | <b>Points Count</b> 32768             | <b>Pulse Sequence</b> single_pulse.ex2 | <b>Receiver Gain</b> 28.00         |
| <b>Solvent</b> CHLOROFORM-d          |  | <b>Spectrum Offset (Hz)</b> 5401.5503 | <b>Sweep Width (Hz)</b> 16534.39       |                                    |

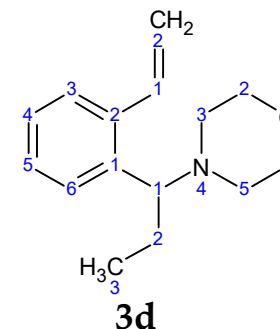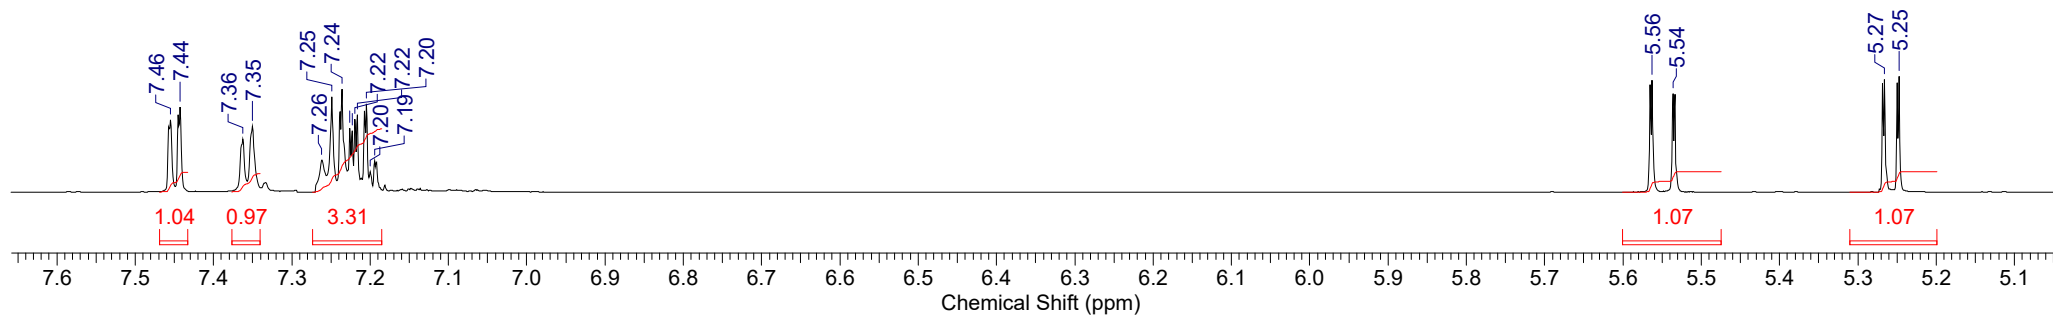



# $^1\text{H}$ NMR spectrum of compound **3d**

|                                      |  |                                       |                                        |                                    |
|--------------------------------------|--|---------------------------------------|----------------------------------------|------------------------------------|
| <b>Acquisition Time (sec)</b> 1.9818 |  | <b>Comment</b> single pulse           | <b>Date</b>                            |                                    |
| <b>Date Stamp</b>                    |  |                                       |                                        |                                    |
| <b>File Name</b>                     |  |                                       | <b>Frequency (MHz)</b> 600.17          |                                    |
| <b>Nucleus</b> $^1\text{H}$          |  | <b>Number of Transients</b> 8         | <b>Origin</b> ECA 600                  | <b>Original Points Count</b> 32768 |
| <b>Owner</b> CKP                     |  | <b>Points Count</b> 32768             | <b>Pulse Sequence</b> single_pulse.ex2 | <b>Receiver Gain</b> 28.00         |
| <b>Solvent</b> CHLOROFORM-d          |  | <b>Spectrum Offset (Hz)</b> 5401.5503 | <b>Sweep Width (Hz)</b> 16534.39       |                                    |

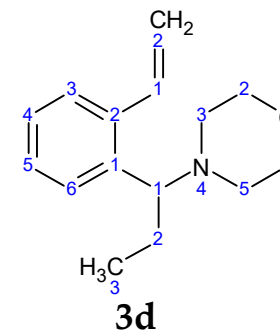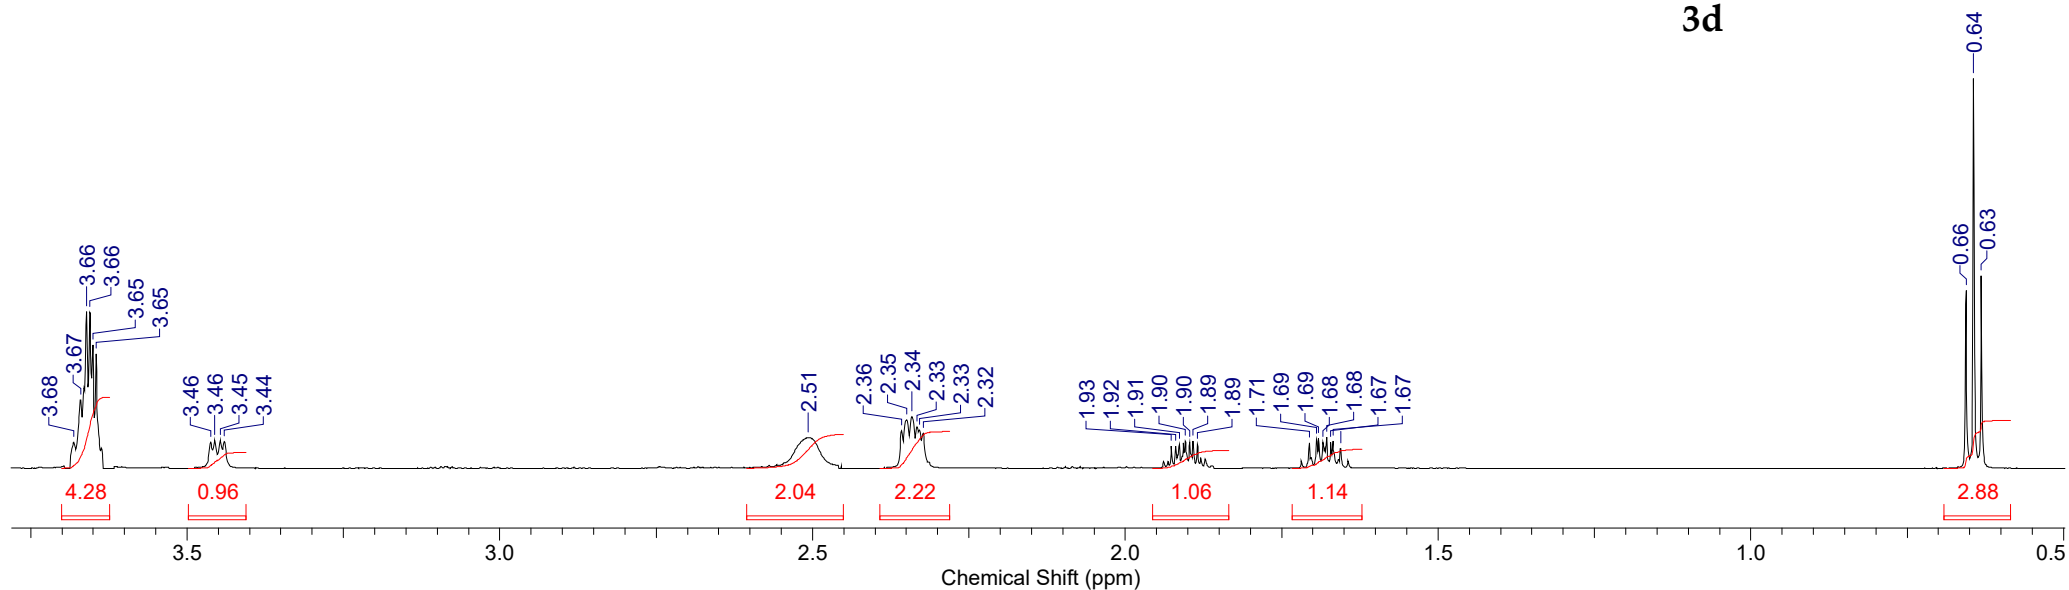

# $^{13}\text{C}$ NMR spectrum of compound 3d

|                                      |              |                                                 |            |                              |                  |
|--------------------------------------|--------------|-------------------------------------------------|------------|------------------------------|------------------|
| <b>Acquisition Time (sec)</b> 0.6921 |              | <b>Comment</b> single pulse decoupled gated NOE |            | <b>Date</b>                  |                  |
| <b>Date Stamp</b>                    |              |                                                 |            |                              |                  |
| <b>File Name</b>                     |              |                                                 |            | <b>Frequency (MHz)</b>       | 150.91           |
| <b>Nucleus</b>                       | 13C          | <b>Number of Transients</b>                     | 1000       | <b>Origin</b>                | ECA 600          |
| <b>Owner</b>                         | CKP          | <b>Points Count</b>                             | 32768      | <b>Pulse Sequence</b>        | single pulse dec |
| <b>Solvent</b>                       | CHLOROFORM-d | <b>Spectrum Offset (Hz)</b>                     | 15076.4629 | <b>Sweep Width (Hz)</b>      | 47348.49         |
|                                      |              |                                                 |            | <b>Original Points Count</b> | 32768            |
|                                      |              |                                                 |            | <b>Receiver Gain</b>         | 56.00            |

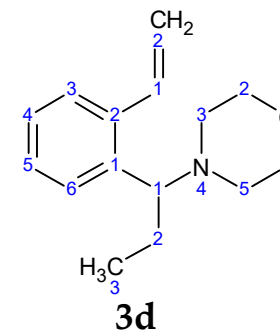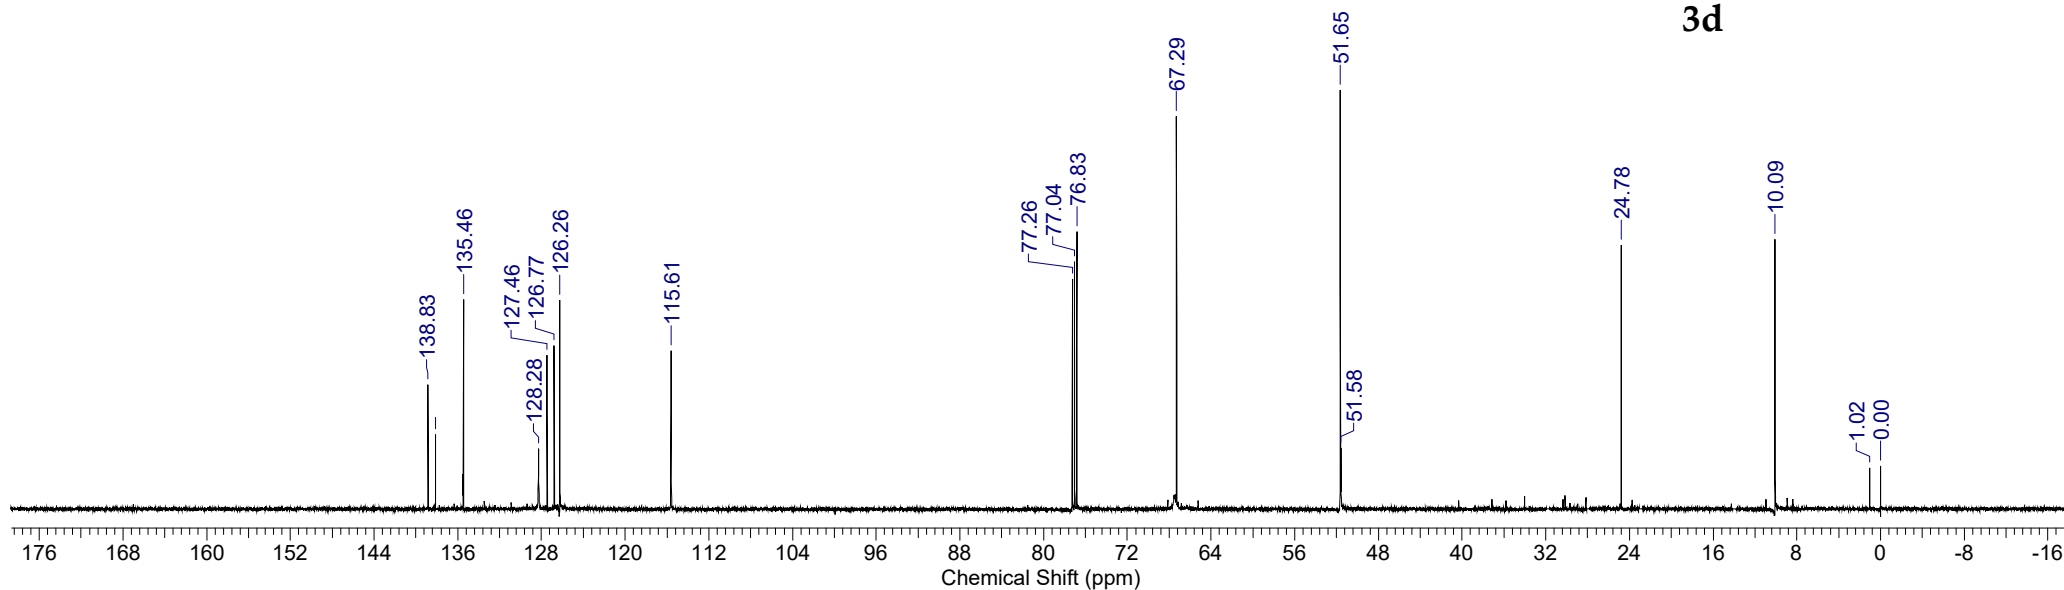

# $^{13}\text{C}$ NMR spectrum of compound 3d

|                                      |                                        |                                                 |                                        |                               |                                    |
|--------------------------------------|----------------------------------------|-------------------------------------------------|----------------------------------------|-------------------------------|------------------------------------|
| <b>Acquisition Time (sec)</b> 0.6921 |                                        | <b>Comment</b> single pulse decoupled gated NOE |                                        | <b>Date</b>                   |                                    |
| <b>Date Stamp</b>                    |                                        |                                                 |                                        |                               |                                    |
| <b>File Name</b>                     |                                        |                                                 |                                        | <b>Frequency (MHz)</b> 150.91 |                                    |
| <b>Nucleus</b> 13C                   | <b>Number of Transients</b> 1000       |                                                 | <b>Origin</b> ECA 600                  |                               | <b>Original Points Count</b> 32768 |
| <b>Owner</b> CKP                     | <b>Points Count</b> 32768              |                                                 | <b>Pulse Sequence</b> single pulse dec |                               | <b>Receiver Gain</b> 56.00         |
| <b>Solvent</b> CHLOROFORM-d          | <b>Spectrum Offset (Hz)</b> 15076.4629 |                                                 | <b>Sweep Width (Hz)</b> 47348.49       |                               |                                    |

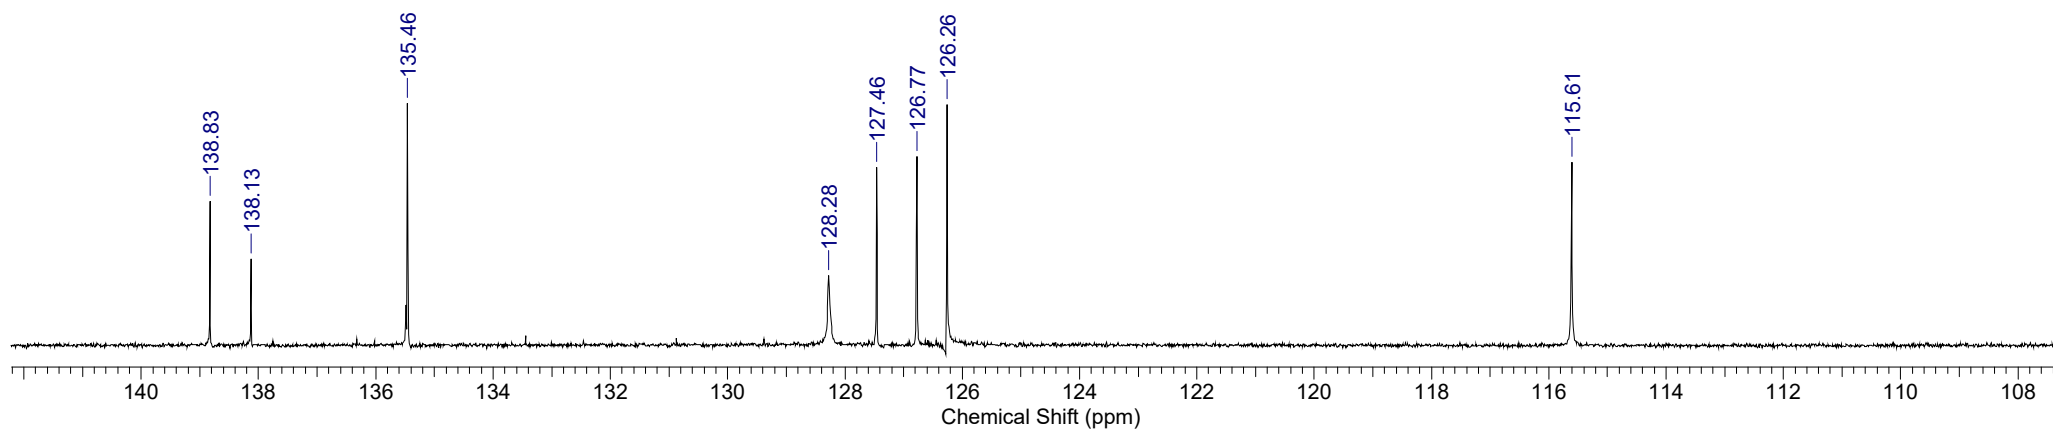

# $^{13}\text{C}$ NMR spectrum of compound 3d

|                                      |              |                                                 |            |                              |                  |
|--------------------------------------|--------------|-------------------------------------------------|------------|------------------------------|------------------|
| <b>Acquisition Time (sec)</b> 0.6921 |              | <b>Comment</b> single pulse decoupled gated NOE |            | <b>Date</b>                  |                  |
| <b>Date Stamp</b>                    |              |                                                 |            |                              |                  |
| <b>File Name</b>                     |              |                                                 |            | <b>Frequency (MHz)</b>       | 150.91           |
| <b>Nucleus</b>                       | 13C          | <b>Number of Transients</b>                     | 1000       | <b>Origin</b>                | ECA 600          |
| <b>Owner</b>                         | CKP          | <b>Points Count</b>                             | 32768      | <b>Pulse Sequence</b>        | single pulse dec |
| <b>Solvent</b>                       | CHLOROFORM-d | <b>Spectrum Offset (Hz)</b>                     | 15076.4629 | <b>Sweep Width (Hz)</b>      | 47348.49         |
|                                      |              |                                                 |            | <b>Original Points Count</b> | 32768            |
|                                      |              |                                                 |            | <b>Receiver Gain</b>         | 56.00            |

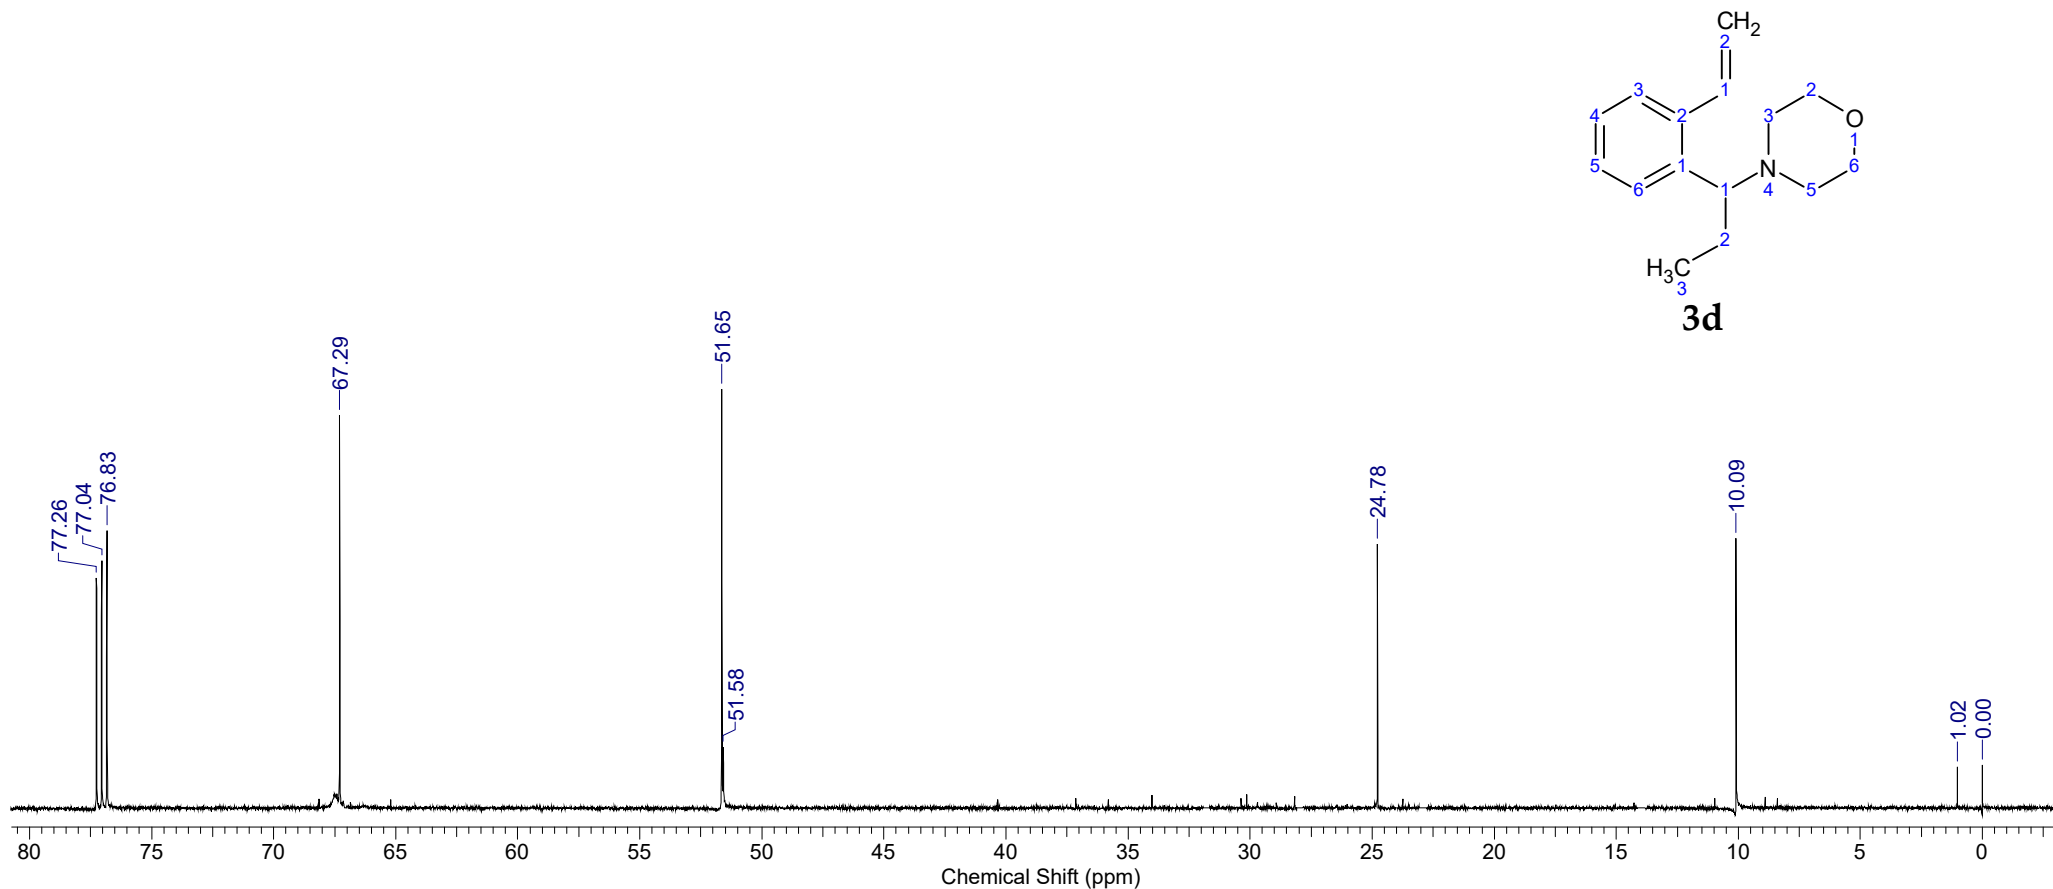

# IR spectrum of compound 3d

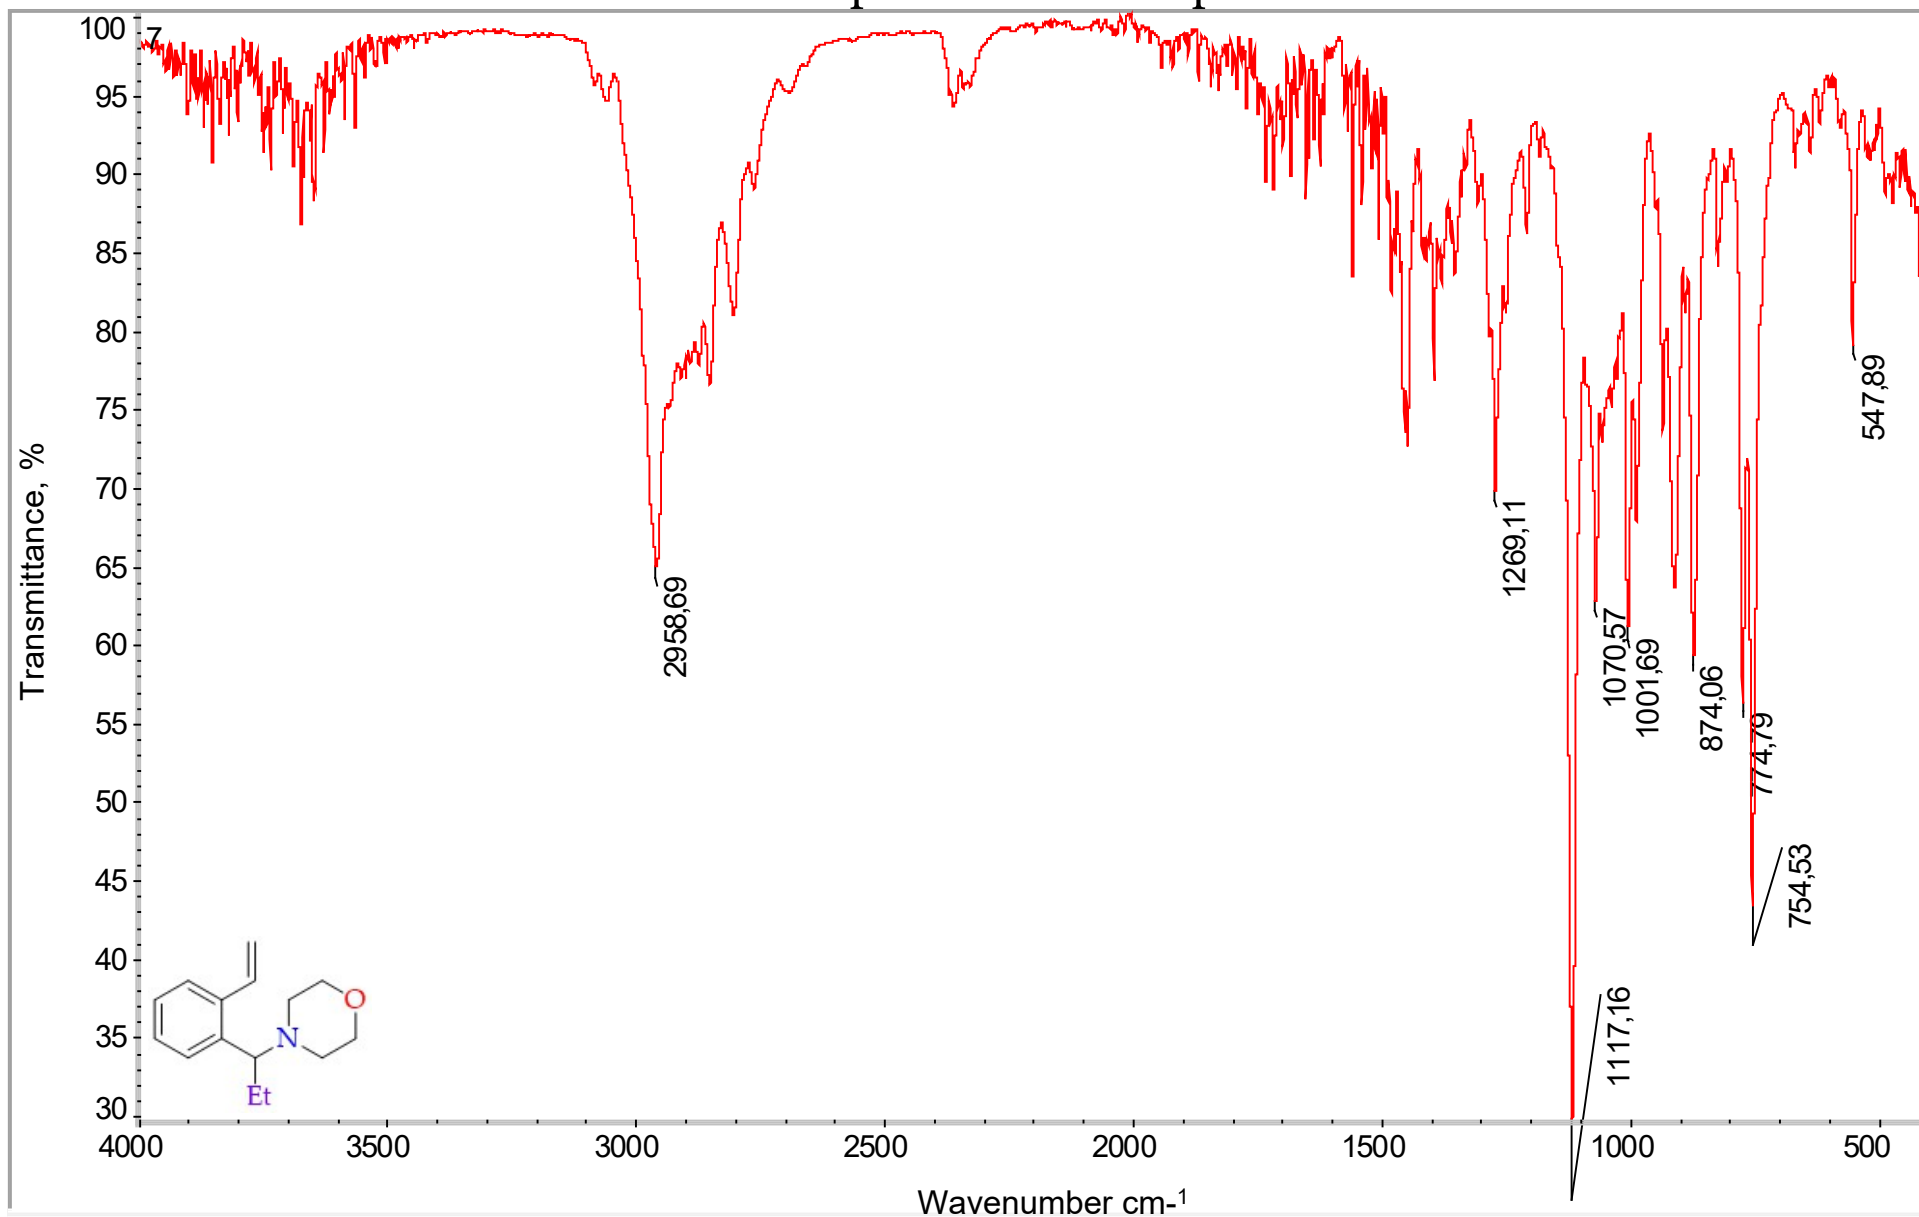

# HRMS (MALDI-TOF) spectrum of compound **3d**

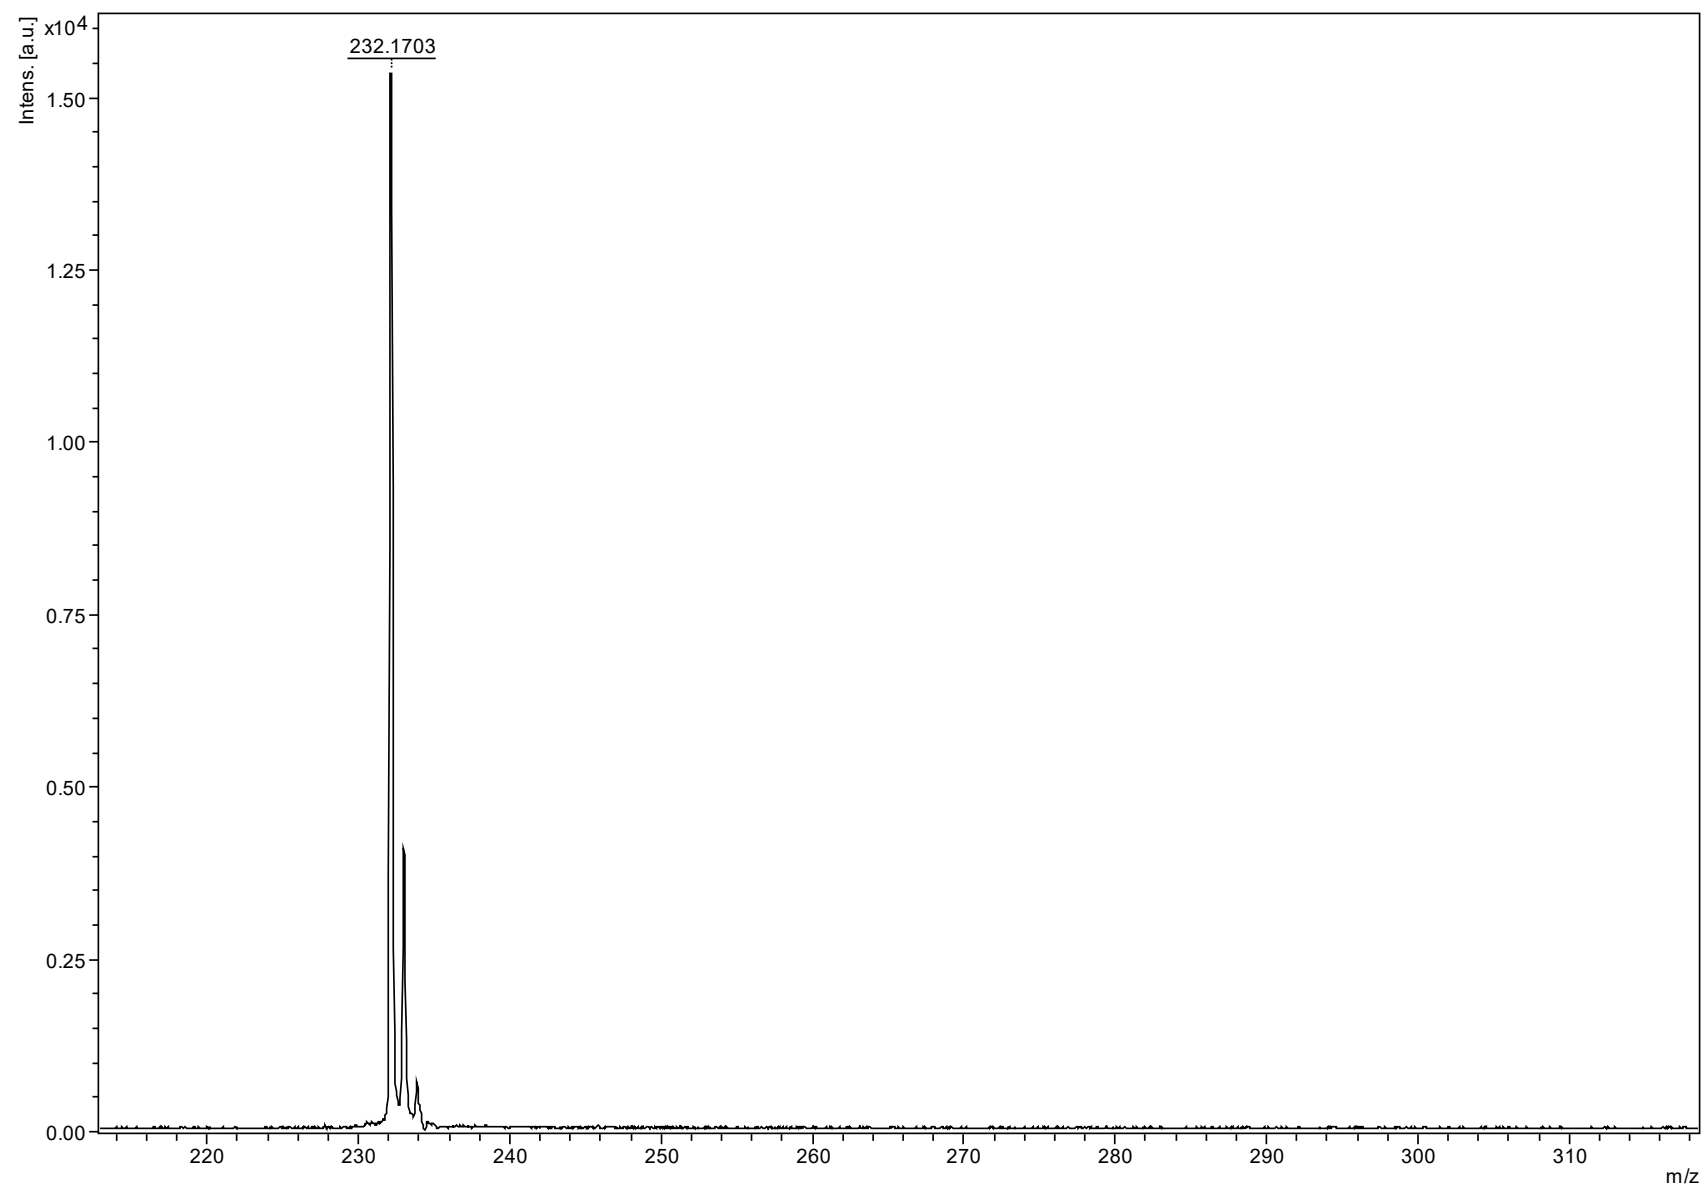

# <sup>1</sup>H spectrum of compound 4a

|                                                                                  |                    |
|----------------------------------------------------------------------------------|--------------------|
| <b>Formula</b> C <sub>32</sub> H <sub>41</sub> Cl <sub>2</sub> N <sub>2</sub> Ru | <b>FW</b> 639.6629 |
|----------------------------------------------------------------------------------|--------------------|

|                                        |                                         |                                   |
|----------------------------------------|-----------------------------------------|-----------------------------------|
| <b>Acquisition Time (sec)</b> 2.5690   | <b>Comment</b> FZ_Grubbs_7-K8 in CD2Cl2 | <b>Date</b> 30 Apr 2019 10:22:56  |
| <b>Date Stamp</b> 30 Apr 2019 10:22:56 | <b>File Name</b>                        |                                   |
| <b>Frequency (MHz)</b> 300.13          | <b>Nucleus</b> 1H                       | <b>Number of Transients</b> 64    |
| <b>Original Points Count</b> 65536     | <b>Owner</b> nmr                        | <b>Points Count</b> 262144        |
| <b>Receiver Gain</b> 80.39             | <b>SW(cyclical) (Hz)</b> 25510.20       | <b>Pulse Sequence</b> zg          |
| <b>Spectrum Offset (Hz)</b> 1350.5919  | <b>Sweep Width (Hz)</b> 25510.11        | <b>Solvent</b> DICHLOROMETHANE-d2 |
|                                        | <b>Temperature (degree C)</b> 30.000    |                                   |

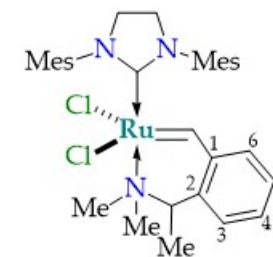

4a

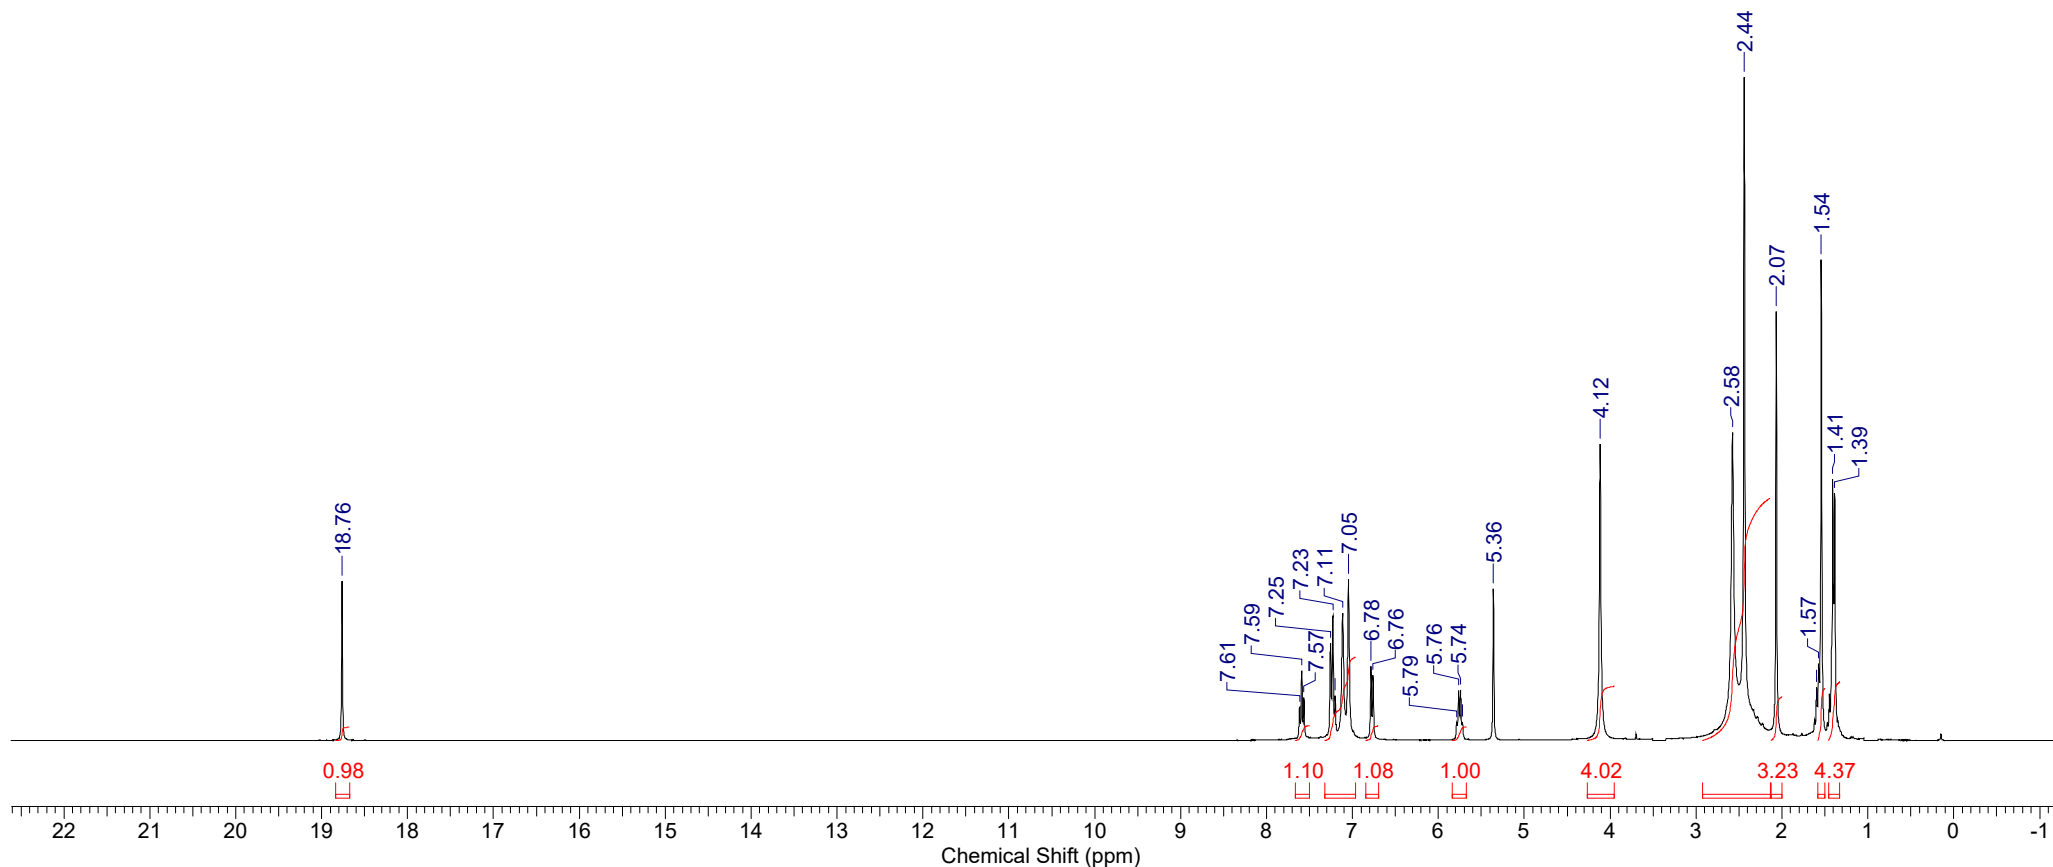

# $^1\text{H}$ spectrum of compound 4a

|                                                                                  |                    |
|----------------------------------------------------------------------------------|--------------------|
| <b>Formula</b> C <sub>32</sub> H <sub>41</sub> Cl <sub>2</sub> N <sub>2</sub> Ru | <b>FW</b> 639.6629 |
|----------------------------------------------------------------------------------|--------------------|

|                                        |                                                                  |                                               |
|----------------------------------------|------------------------------------------------------------------|-----------------------------------------------|
| <b>Acquisition Time (sec)</b> 2.5690   | <b>Comment</b> FZ_Grubbs_7-K8 in CD <sub>2</sub> Cl <sub>2</sub> | <b>Date</b> 30 Apr 2019 10:22:56              |
| <b>Date Stamp</b> 30 Apr 2019 10:22:56 | <b>File Name</b>                                                 |                                               |
| <b>Frequency (MHz)</b> 300.13          | <b>Nucleus</b> $^1\text{H}$                                      | <b>Number of Transients</b> 64                |
| <b>Original Points Count</b> 65536     | <b>Owner</b> nmr                                                 | <b>Points Count</b> 262144                    |
| <b>Receiver Gain</b> 80.39             | <b>SW(cyclical) (Hz)</b> 25510.20                                | <b>Pulse Sequence</b> zg                      |
| <b>Spectrum Offset (Hz)</b> 1350.5919  | <b>Sweep Width (Hz)</b> 25510.11                                 | <b>Solvent</b> DICHLOROMETHANE-d <sub>2</sub> |
|                                        | <b>Temperature (degree C)</b> 30.000                             |                                               |

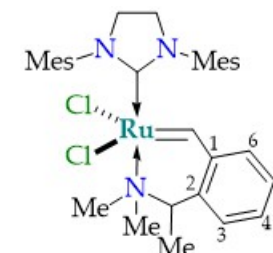

**4a**

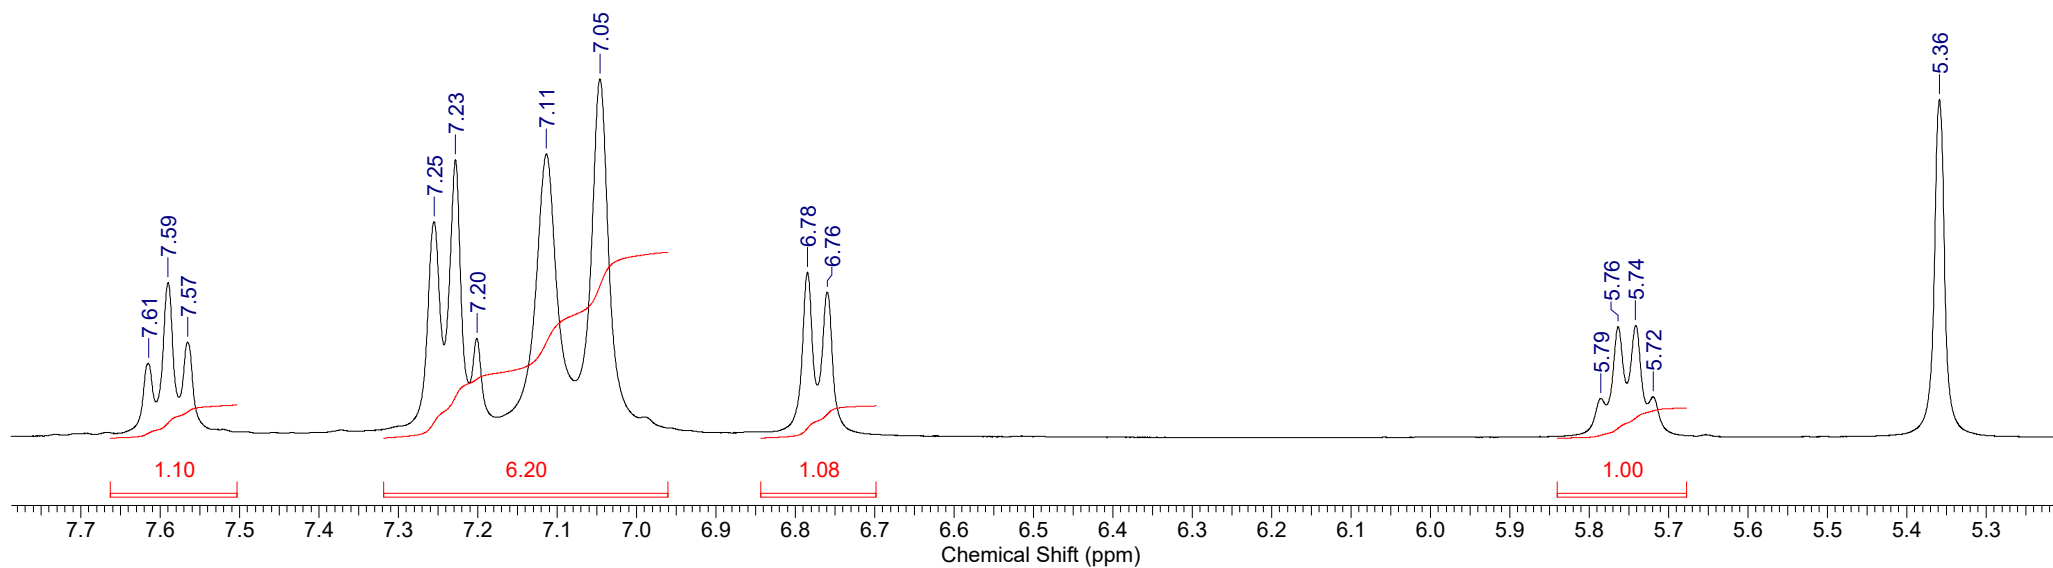



### <sup>1</sup>H spectrum of compound 4a

|                                                                                  |                    |
|----------------------------------------------------------------------------------|--------------------|
| <b>Formula</b> C <sub>32</sub> H <sub>41</sub> Cl <sub>2</sub> N <sub>3</sub> Ru | <b>FW</b> 639.6629 |
|----------------------------------------------------------------------------------|--------------------|

|                               |                      |                          |                          |                               |                    |                          |
|-------------------------------|----------------------|--------------------------|--------------------------|-------------------------------|--------------------|--------------------------|
| <b>Acquisition Time (sec)</b> | 2.5690               | <b>Comment</b>           | FZ Grubbs 7-K8 in CD2Cl2 |                               | <b>Date</b>        | 30 Apr 2019 10:22:56     |
| <b>Date Stamp</b>             | 30 Apr 2019 10:22:56 |                          | <b>File Name</b>         |                               |                    |                          |
| <b>Frequency (MHz)</b>        | 300.13               | <b>Nucleus</b>           | 1H                       | <b>Number of Transients</b>   | 64                 | <b>Origin</b> spect      |
| <b>Original Points Count</b>  | 65536                | <b>Owner</b>             | nmr                      | <b>Points Count</b>           | 262144             | <b>Pulse Sequence</b> zg |
| <b>Receiver Gain</b>          | 80.39                | <b>SW(cyclical) (Hz)</b> | 25510.20                 | <b>Solvent</b>                | DICHLOROMETHANE-d2 |                          |
| <b>Spectrum Offset (Hz)</b>   | 1350.5919            | <b>Sweep Width (Hz)</b>  | 25510.11                 | <b>Temperature (degree C)</b> | 30.000             |                          |

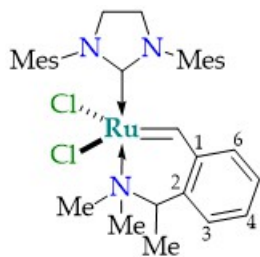

**4a**

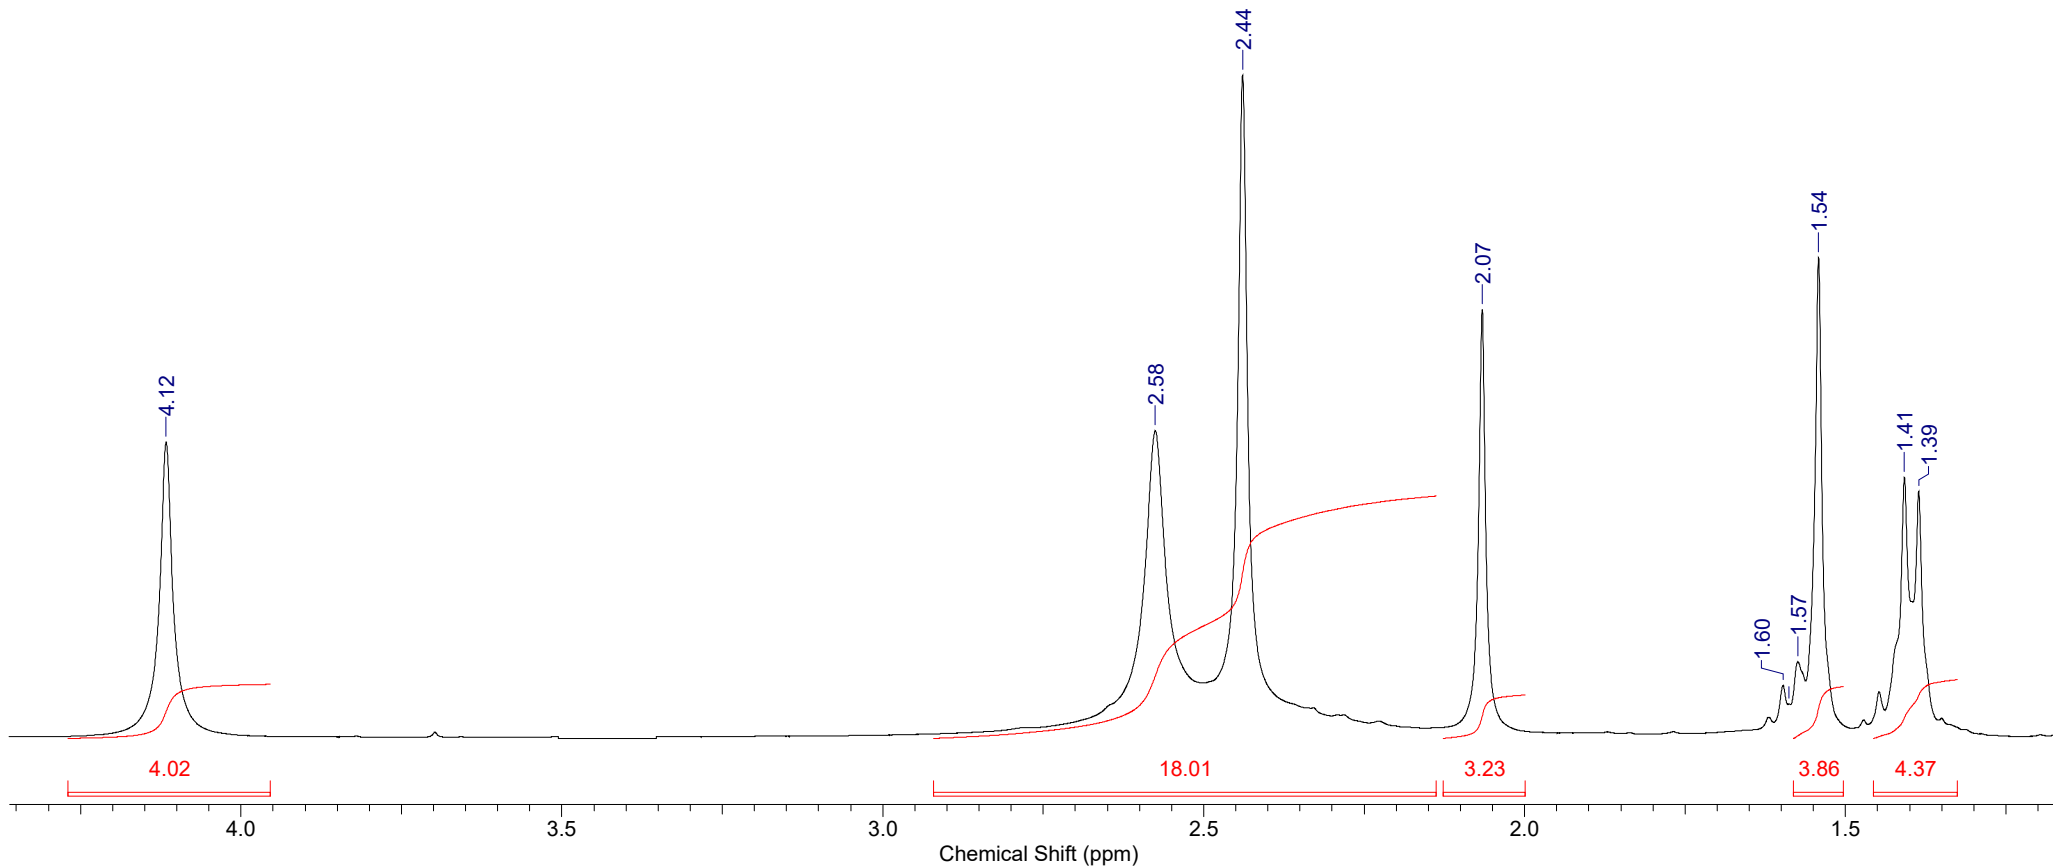

# $^{13}\text{C}$ spectrum of compound 4a

|                                                                                  |                    |
|----------------------------------------------------------------------------------|--------------------|
| <b>Formula</b> C <sub>32</sub> H <sub>41</sub> Cl <sub>2</sub> N <sub>2</sub> Ru | <b>FW</b> 639.6629 |
|----------------------------------------------------------------------------------|--------------------|

|                                        |                                               |                                               |
|----------------------------------------|-----------------------------------------------|-----------------------------------------------|
| <b>Acquisition Time (sec)</b> 1.1010   | <b>Comment</b> FZ Grubbs 7-K8-C13dec [hp-dec] | <b>Date</b> 30 Apr 2019 12:39:28              |
| <b>Date Stamp</b> 30 Apr 2019 12:39:28 | <b>File Name</b>                              |                                               |
| <b>Frequency (MHz)</b> 75.47           | <b>Nucleus</b> $^{13}\text{C}$                | <b>Number of Transients</b> 2224              |
| <b>Original Points Count</b> 65536     | <b>Owner</b> nmr                              | <b>Points Count</b> 262144                    |
| <b>Receiver Gain</b> 202.48            | <b>SW(cyclical) (Hz)</b> 59523.81             | <b>Pulse Sequence</b> zgpg                    |
| <b>Spectrum Offset (Hz)</b> 7546.7783  | <b>Sweep Width (Hz)</b> 59523.58              | <b>Solvent</b> DICHLOROMETHANE-d <sub>2</sub> |
|                                        | <b>Temperature (degree C)</b> 29.987          |                                               |



4a

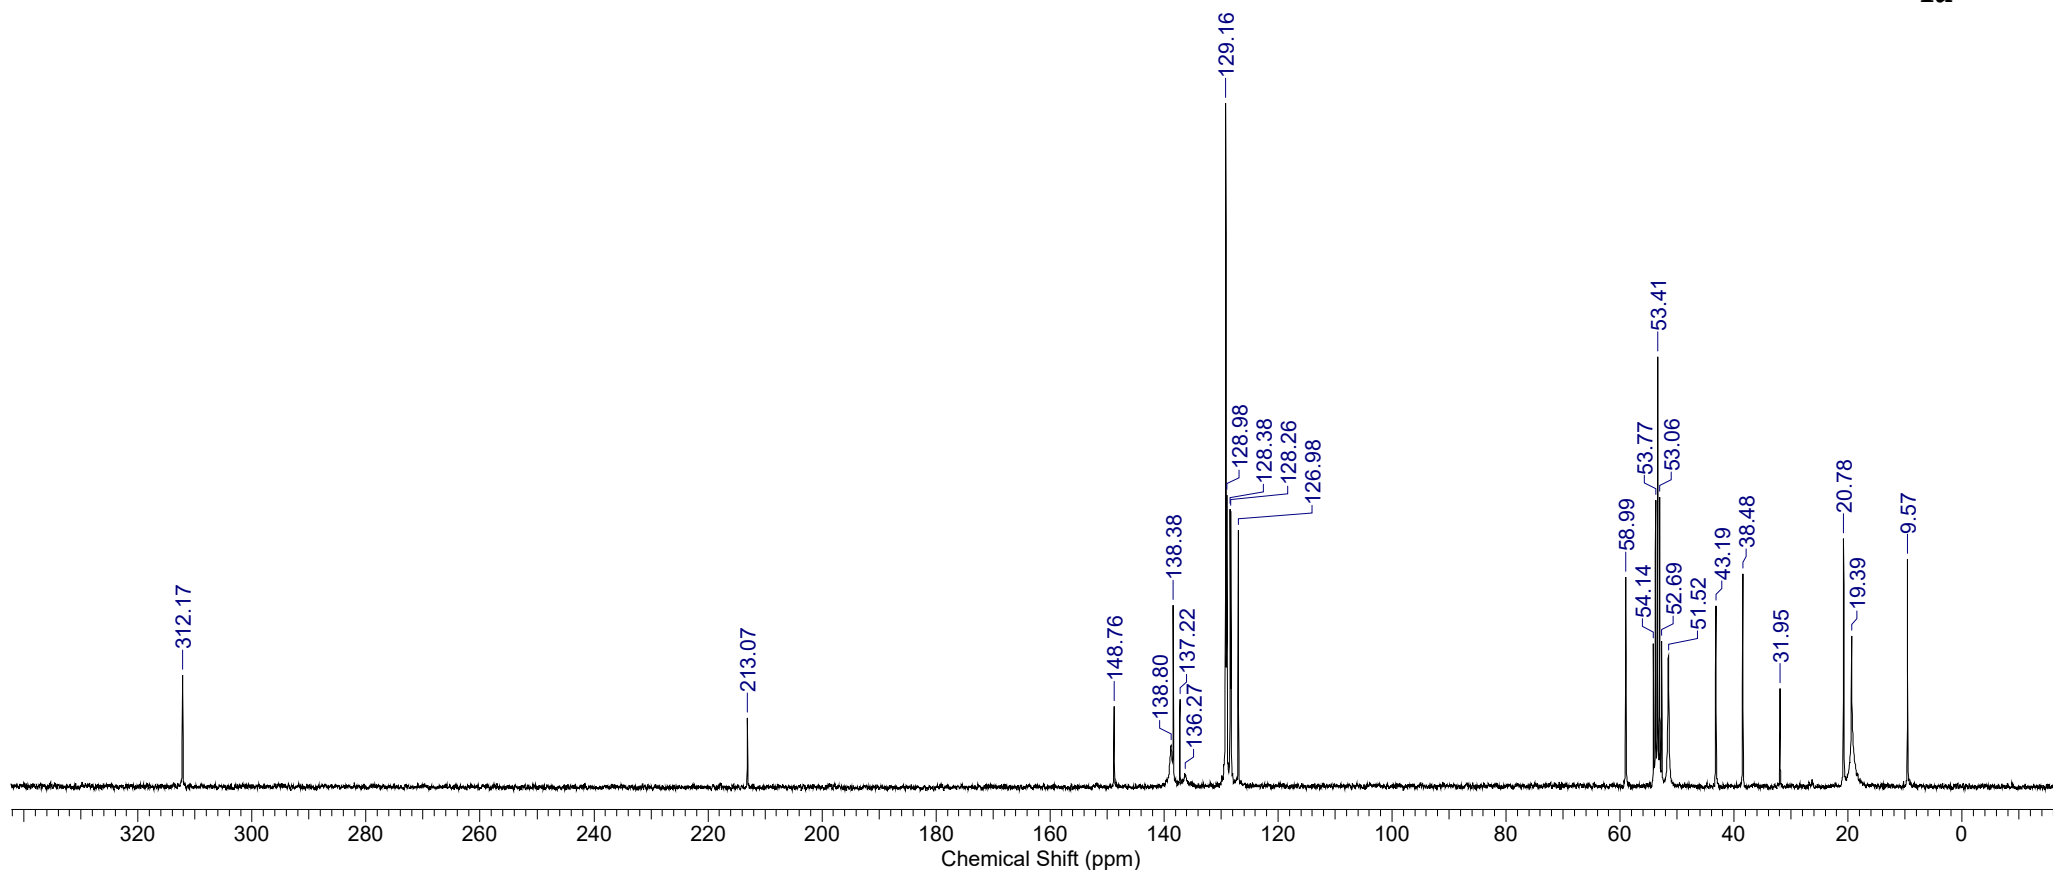

# $^{13}\text{C}$ spectrum of compound 4a

|                                                                                  |                    |
|----------------------------------------------------------------------------------|--------------------|
| <b>Formula</b> C <sub>32</sub> H <sub>41</sub> Cl <sub>2</sub> N <sub>2</sub> Ru | <b>FW</b> 639.6629 |
|----------------------------------------------------------------------------------|--------------------|

|                                        |                                               |                                      |
|----------------------------------------|-----------------------------------------------|--------------------------------------|
| <b>Acquisition Time (sec)</b> 1.1010   | <b>Comment</b> FZ Grubbs 7-K8-C13dec [hp-dec] | <b>Date</b> 30 Apr 2019 12:39:28     |
| <b>Date Stamp</b> 30 Apr 2019 12:39:28 | <b>File Name</b>                              |                                      |
| <b>Frequency (MHz)</b> 75.47           | <b>Nucleus</b> $^{13}\text{C}$                | <b>Number of Transients</b> 2224     |
| <b>Original Points Count</b> 65536     | <b>Owner</b> nmr                              | <b>Points Count</b> 262144           |
| <b>Receiver Gain</b> 202.48            | <b>SW(cyclical) (Hz)</b> 59523.81             | <b>Pulse Sequence</b> zgpg           |
| <b>Spectrum Offset (Hz)</b> 7546.7783  | <b>Solvent</b> DICHLOROMETHANE-d <sub>2</sub> |                                      |
|                                        | <b>Sweep Width (Hz)</b> 59523.58              | <b>Temperature (degree C)</b> 29.987 |



4a

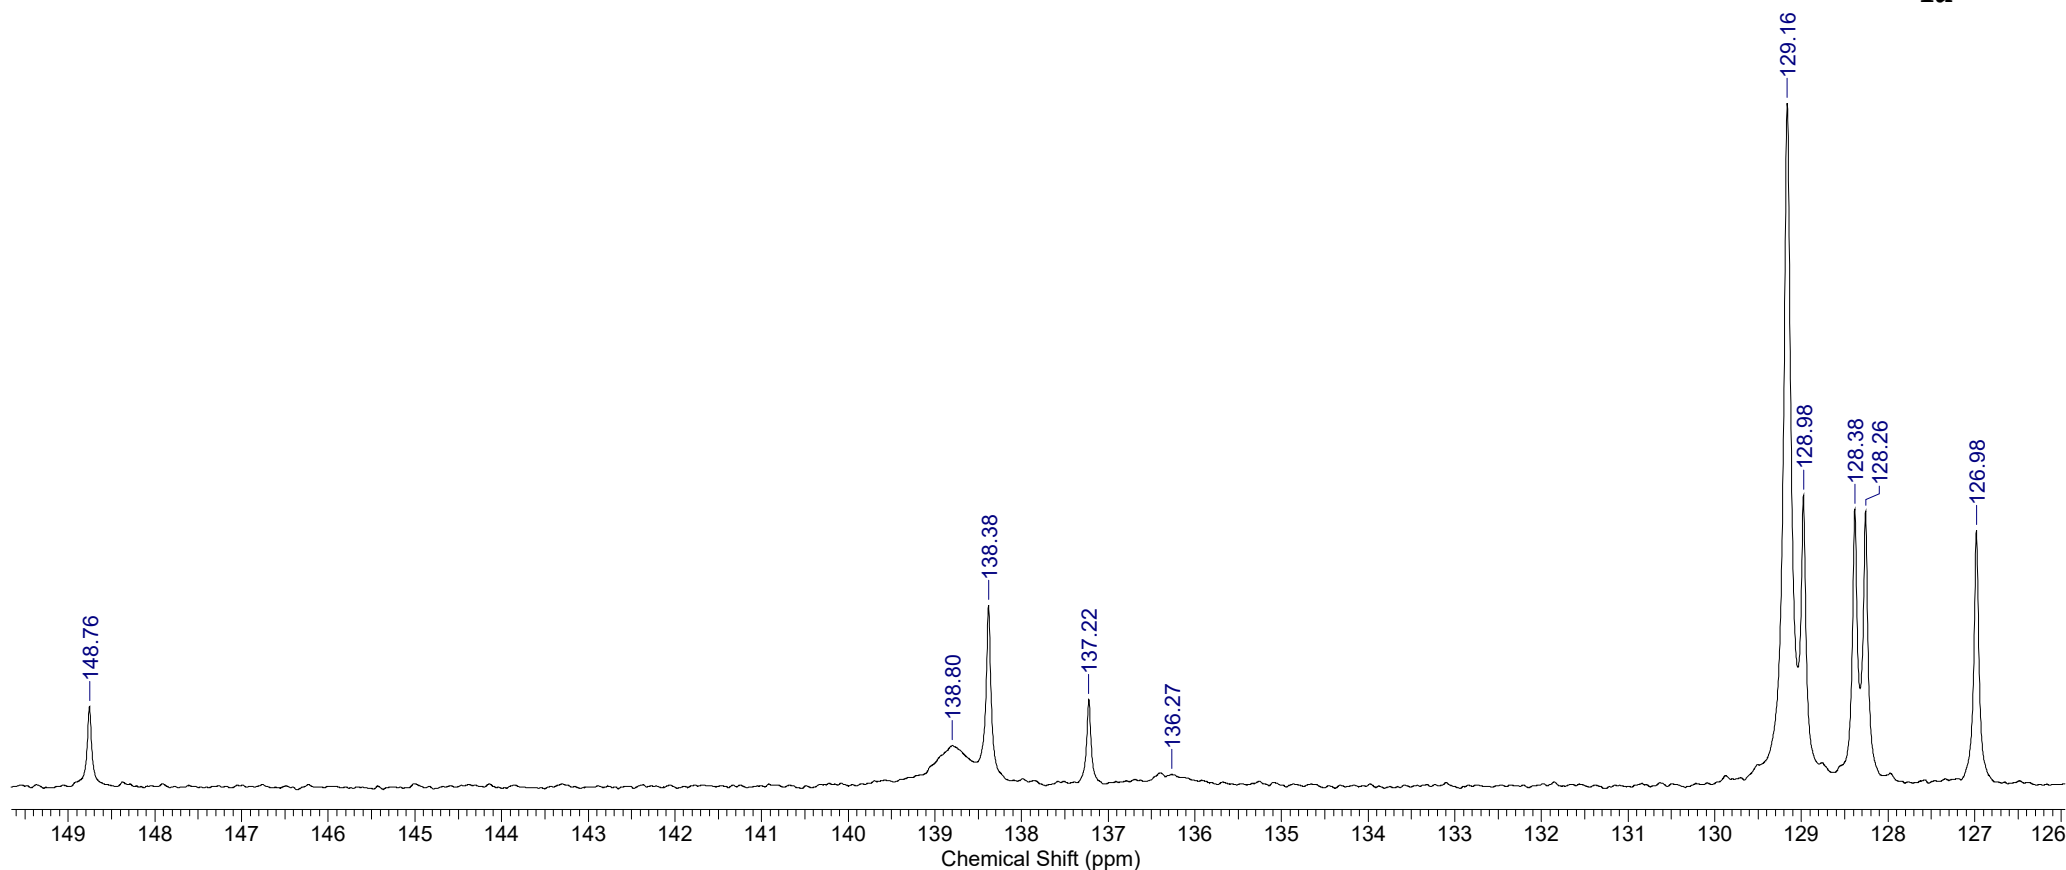

# $^{13}\text{C}$ spectrum of compound 4a

|                                                                                  |                    |
|----------------------------------------------------------------------------------|--------------------|
| <b>Formula</b> C <sub>32</sub> H <sub>41</sub> Cl <sub>2</sub> N <sub>2</sub> Ru | <b>FW</b> 639.6629 |
|----------------------------------------------------------------------------------|--------------------|

|                                        |                                               |                                               |
|----------------------------------------|-----------------------------------------------|-----------------------------------------------|
| <b>Acquisition Time (sec)</b> 1.1010   | <b>Comment</b> FZ Grubbs 7-K8-C13dec [hp-dec] | <b>Date</b> 30 Apr 2019 12:39:28              |
| <b>Date Stamp</b> 30 Apr 2019 12:39:28 | <b>File Name</b>                              |                                               |
| <b>Frequency (MHz)</b> 75.47           | <b>Nucleus</b> $^{13}\text{C}$                | <b>Number of Transients</b> 2224              |
| <b>Original Points Count</b> 65536     | <b>Owner</b> nmr                              | <b>Points Count</b> 262144                    |
| <b>Receiver Gain</b> 202.48            | <b>SW(cyclical) (Hz)</b> 59523.81             | <b>Solvent</b> DICHLOROMETHANE-d <sub>2</sub> |
| <b>Spectrum Offset (Hz)</b> 7546.7783  | <b>Sweep Width (Hz)</b> 59523.58              | <b>Temperature (degree C)</b> 29.987          |



4a

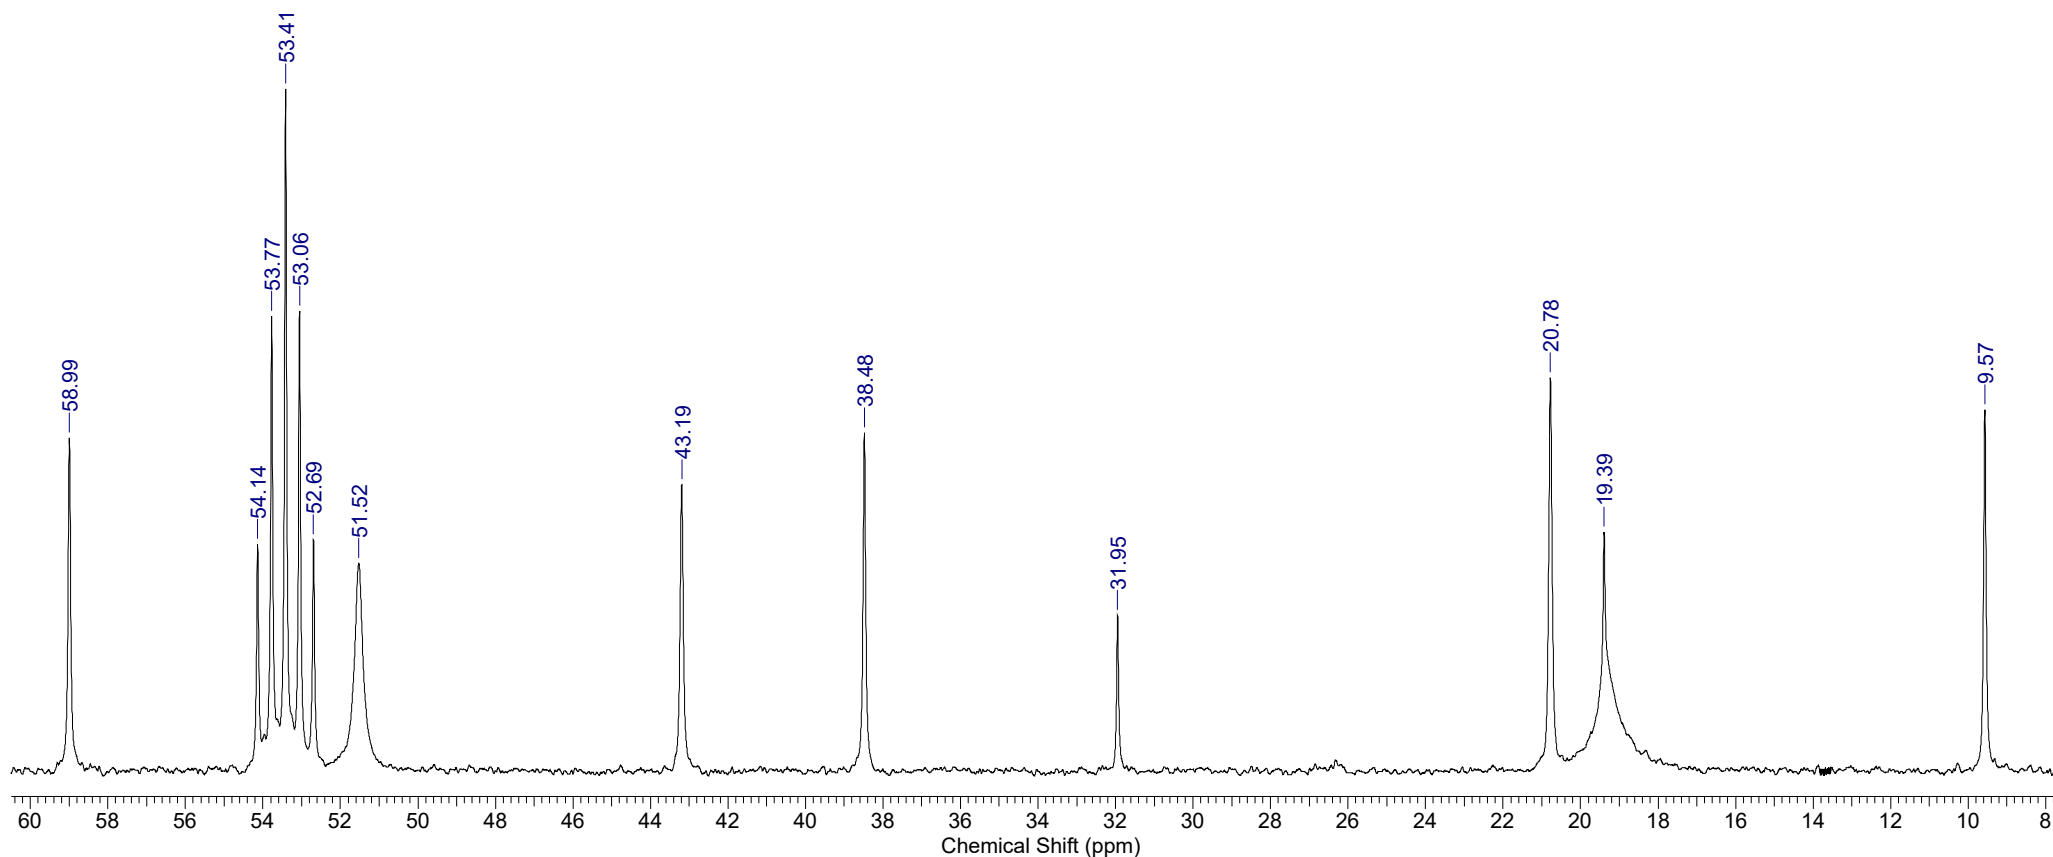

# DEPT-135 spectrum of compound 4a

|                                                                                  |                    |
|----------------------------------------------------------------------------------|--------------------|
| <b>Formula</b> C <sub>32</sub> H <sub>41</sub> Cl <sub>2</sub> N <sub>2</sub> Ru | <b>FW</b> 639.6629 |
|----------------------------------------------------------------------------------|--------------------|

|                                        |                                                |                                               |
|----------------------------------------|------------------------------------------------|-----------------------------------------------|
| <b>Acquisition Time (sec)</b> 1.1010   | <b>Comment</b> FZ_Grubbs_7-K8-dept135 [hp-dec] | <b>Date</b> 30 Apr 2019 10:40:00              |
| <b>Date Stamp</b> 30 Apr 2019 10:40:00 | <b>File Name</b>                               |                                               |
| <b>Frequency (MHz)</b> 75.47           | <b>Nucleus</b> <sup>13</sup> C                 | <b>Number of Transients</b> 632               |
| <b>Original Points Count</b> 65536     | <b>Owner</b> nmr                               | <b>Points Count</b> 262144                    |
| <b>Receiver Gain</b> 202.48            | <b>SW(cyclical) (Hz)</b> 59523.81              | <b>Pulse Sequence</b> dept135                 |
| <b>Spectrum Offset (Hz)</b> 7546.7783  | <b>Sweep Width (Hz)</b> 59523.58               | <b>Solvent</b> DICHLOROMETHANE-d <sub>2</sub> |
|                                        | <b>Temperature (degree C)</b> 29.976           |                                               |



**4a**

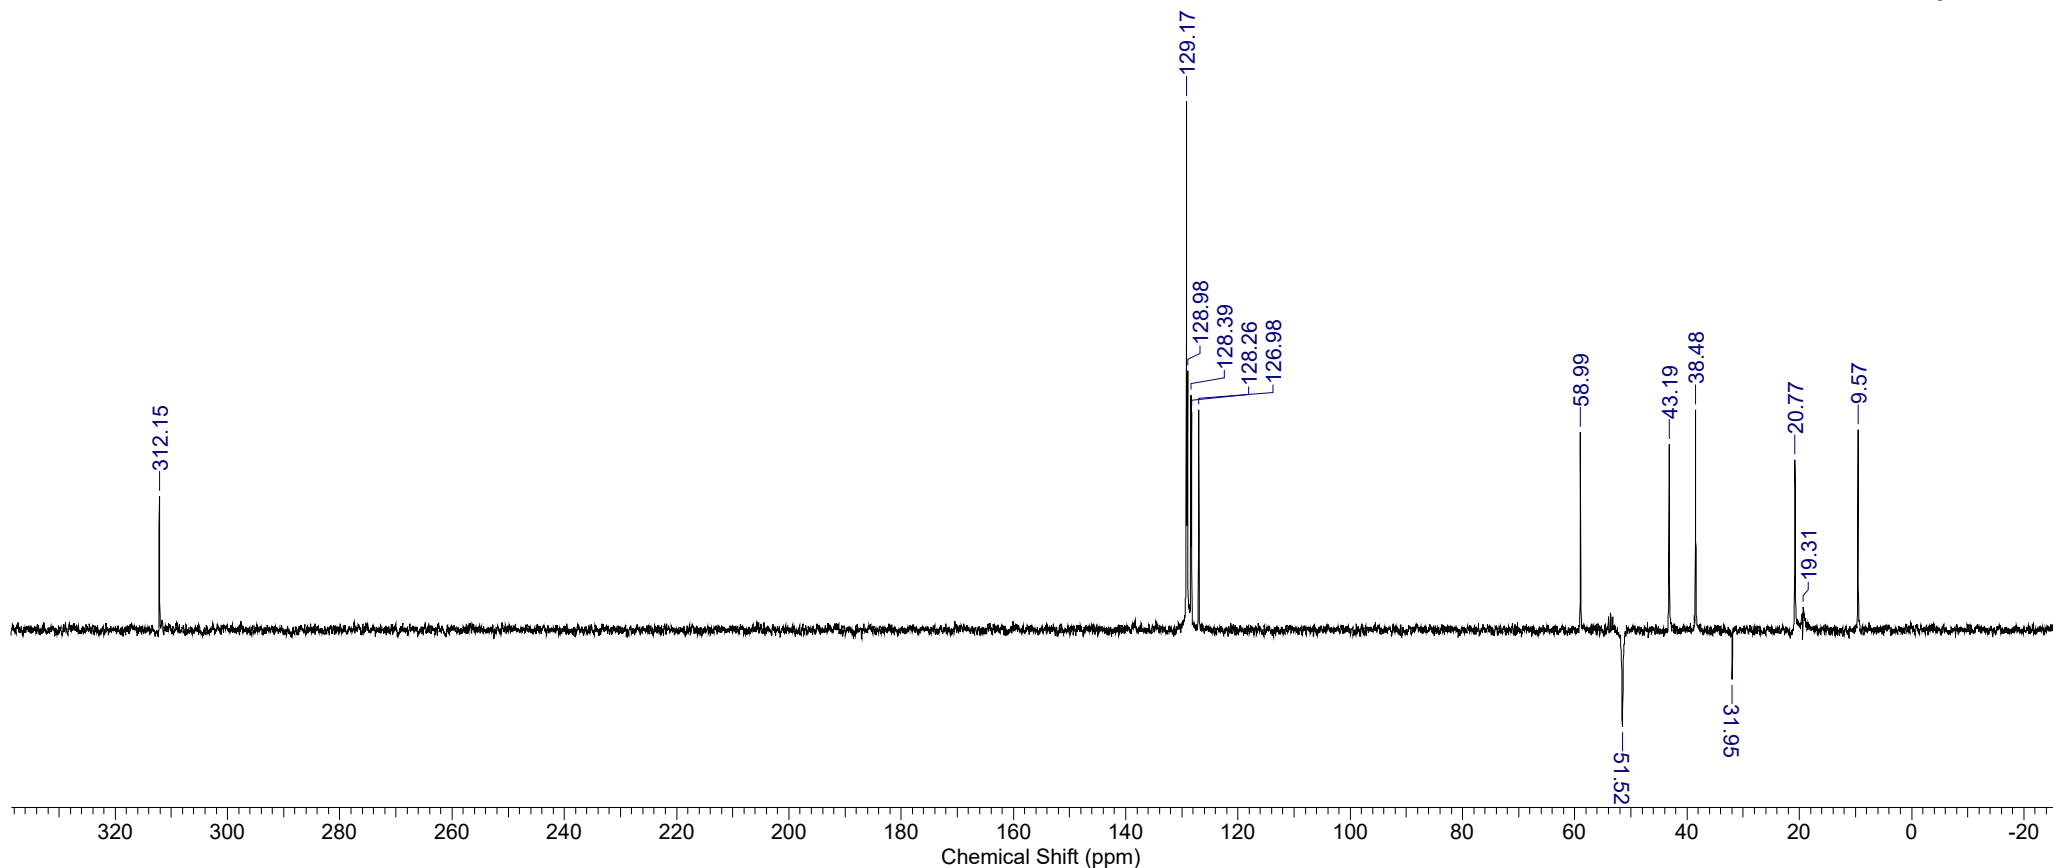

# DEPT-135 spectrum of compound 4a

|                                                                                  |                    |
|----------------------------------------------------------------------------------|--------------------|
| <b>Formula</b> C <sub>32</sub> H <sub>41</sub> Cl <sub>2</sub> N <sub>2</sub> Ru | <b>FW</b> 639.6629 |
|----------------------------------------------------------------------------------|--------------------|

|                                        |                                                |                                   |
|----------------------------------------|------------------------------------------------|-----------------------------------|
| <b>Acquisition Time (sec)</b> 1.1010   | <b>Comment</b> FZ_Grubbs_7-K8-dept135 [hp-dec] | <b>Date</b> 30 Apr 2019 10:40:00  |
| <b>Date Stamp</b> 30 Apr 2019 10:40:00 | <b>File Name</b>                               |                                   |
| <b>Frequency (MHz)</b> 75.47           | <b>Nucleus</b> <sup>13</sup> C                 | <b>Number of Transients</b> 632   |
| <b>Original Points Count</b> 65536     | <b>Owner</b> nmr                               | <b>Points Count</b> 262144        |
| <b>Receiver Gain</b> 202.48            | <b>SW(cyclical) (Hz)</b> 59523.81              | <b>Pulse Sequence</b> dept135     |
| <b>Spectrum Offset (Hz)</b> 7546.7783  | <b>Sweep Width (Hz)</b> 59523.58               | <b>Solvent</b> DICHLOROMETHANE-d2 |
|                                        | <b>Temperature (degree C)</b> 29.976           |                                   |



**4a**

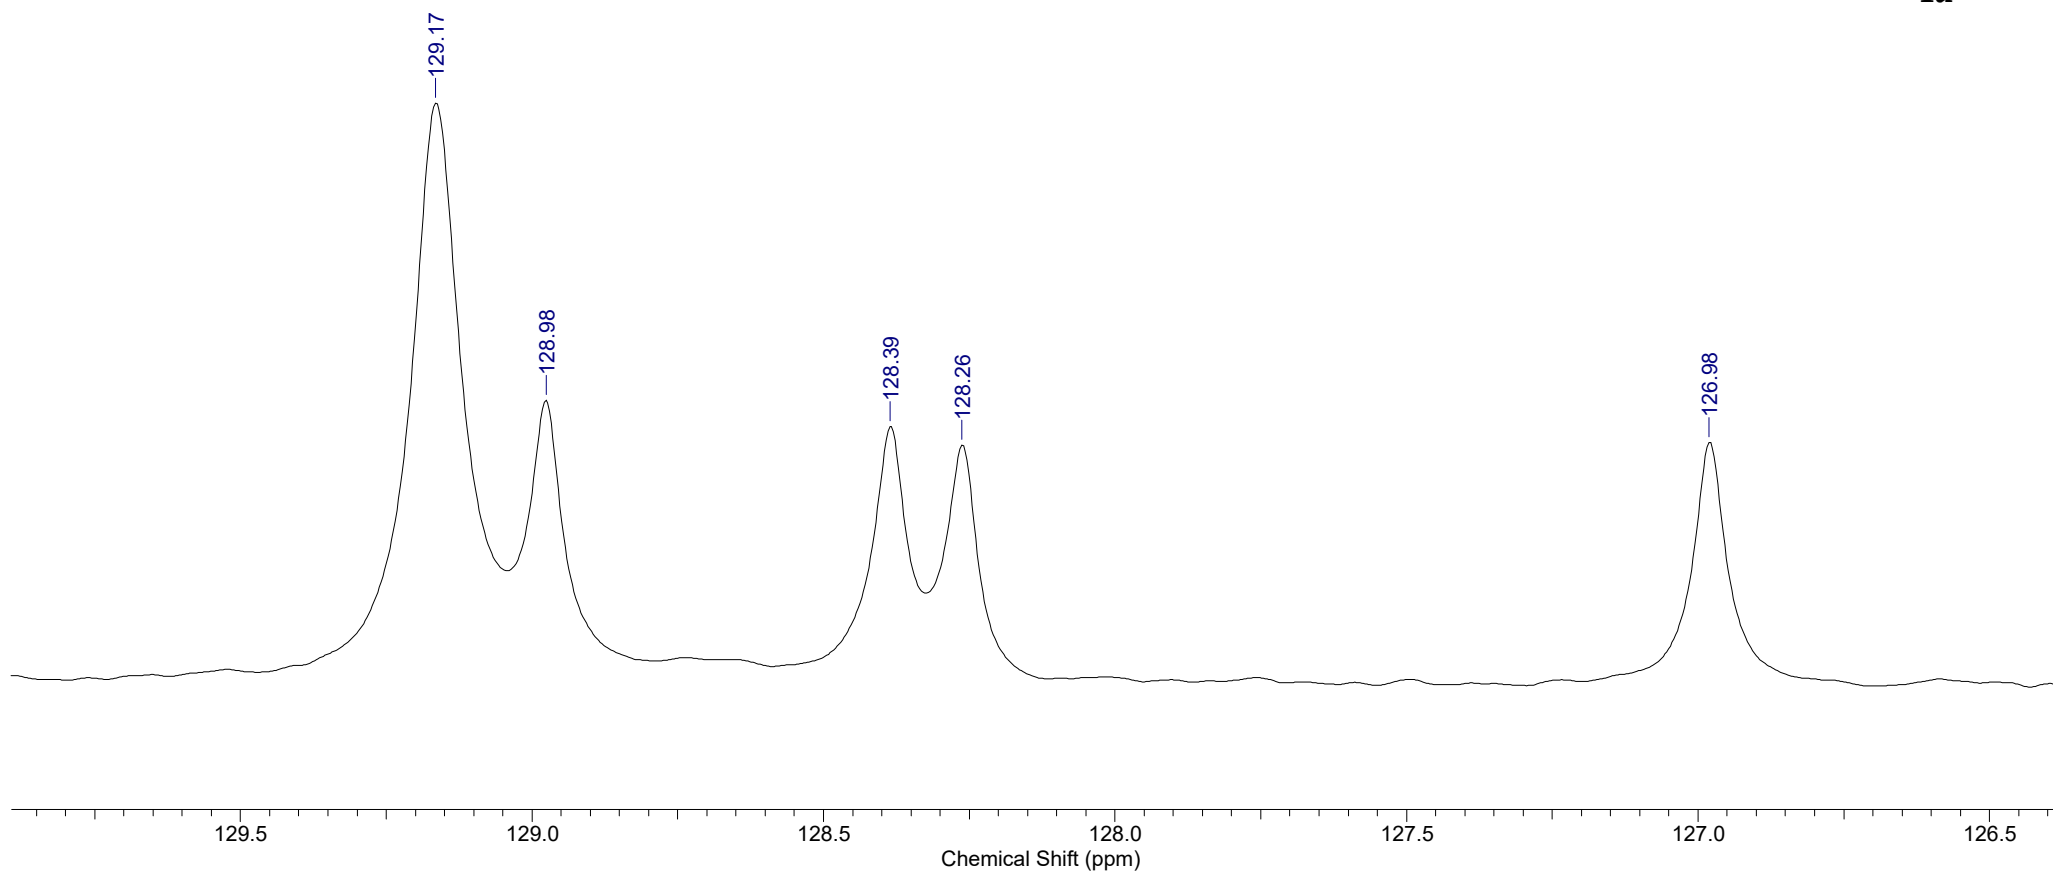

# DEPT-135 spectrum of compound 4a

|                                                                    |                    |
|--------------------------------------------------------------------|--------------------|
| <b>Formula</b> C <sub>32</sub> H <sub>41</sub> ClN <sub>2</sub> Ru | <b>FW</b> 639.6629 |
|--------------------------------------------------------------------|--------------------|

|                                        |                                                |                                   |
|----------------------------------------|------------------------------------------------|-----------------------------------|
| <b>Acquisition Time (sec)</b> 1.1010   | <b>Comment</b> FZ Grubbs 7-K8-dept135 [hp-dec] | <b>Date</b> 30 Apr 2019 10:40:00  |
| <b>Date Stamp</b> 30 Apr 2019 10:40:00 | <b>File Name</b>                               |                                   |
| <b>Frequency (MHz)</b> 75.47           | <b>Nucleus</b> 13C                             | <b>Number of Transients</b> 632   |
| <b>Original Points Count</b> 65536     | <b>Owner</b> nmr                               | <b>Points Count</b> 262144        |
| <b>Receiver Gain</b> 202.48            | <b>SW(cyclical) (Hz)</b> 59523.81              | <b>Pulse Sequence</b> dept135     |
| <b>Spectrum Offset (Hz)</b> 7546.7783  | <b>Sweep Width (Hz)</b> 59523.58               | <b>Solvent</b> DICHLOROMETHANE-d2 |
|                                        | <b>Temperature (degree C)</b> 29.976           |                                   |

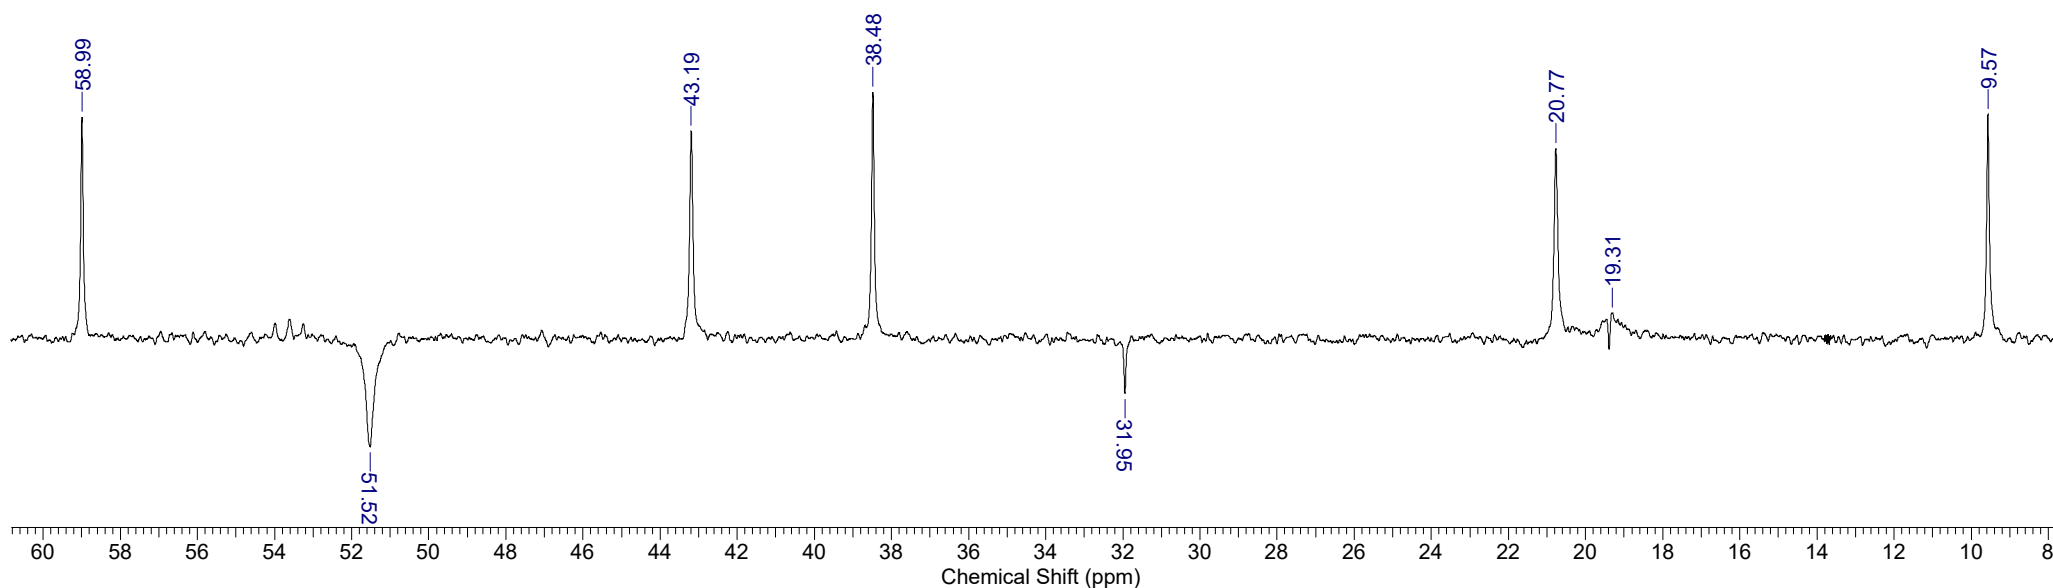

# COSY spectrum of compound 4a

|                               |                                                                               |                               |                                       |                        |                      |
|-------------------------------|-------------------------------------------------------------------------------|-------------------------------|---------------------------------------|------------------------|----------------------|
| <b>Acquisition Time (sec)</b> | (0.3408, 0.0426)                                                              | <b>Comment</b>                | 5 mm PABBO BB-1H/D Z-GRD Z104275/0345 | <b>Date</b>            | 30 Apr 2019 17:10:26 |
| <b>File Name</b>              | C:\Users\Fedor\Desktop\Новые катализаторы от Ромы\FZ_Grubbs_7-K8\11\data\12rr |                               |                                       | <b>Frequency (MHz)</b> | (300.13, 300.13)     |
| <b>Nucleus</b>                | (1H, 1H)                                                                      | <b>Number of Transients</b>   | 1                                     | <b>Origin</b>          | spect                |
| <b>Owner</b>                  | nmr                                                                           | <b>Points Count</b>           | (8192, 1024)                          | <b>Pulse Sequence</b>  | cosygpgf             |
| <b>Sweep Width (Hz)</b>       | (9014.42, 9009.01)                                                            | <b>Temperature (degree C)</b> | 30.007                                | <b>Title</b>           | FZ_Grubbs_7-K8-COSY  |
| <b>Formula</b>                | C <sub>32</sub> H <sub>41</sub> Cl <sub>2</sub> N <sub>2</sub> Ru             | <b>FW</b>                     | 639.6629                              |                        |                      |

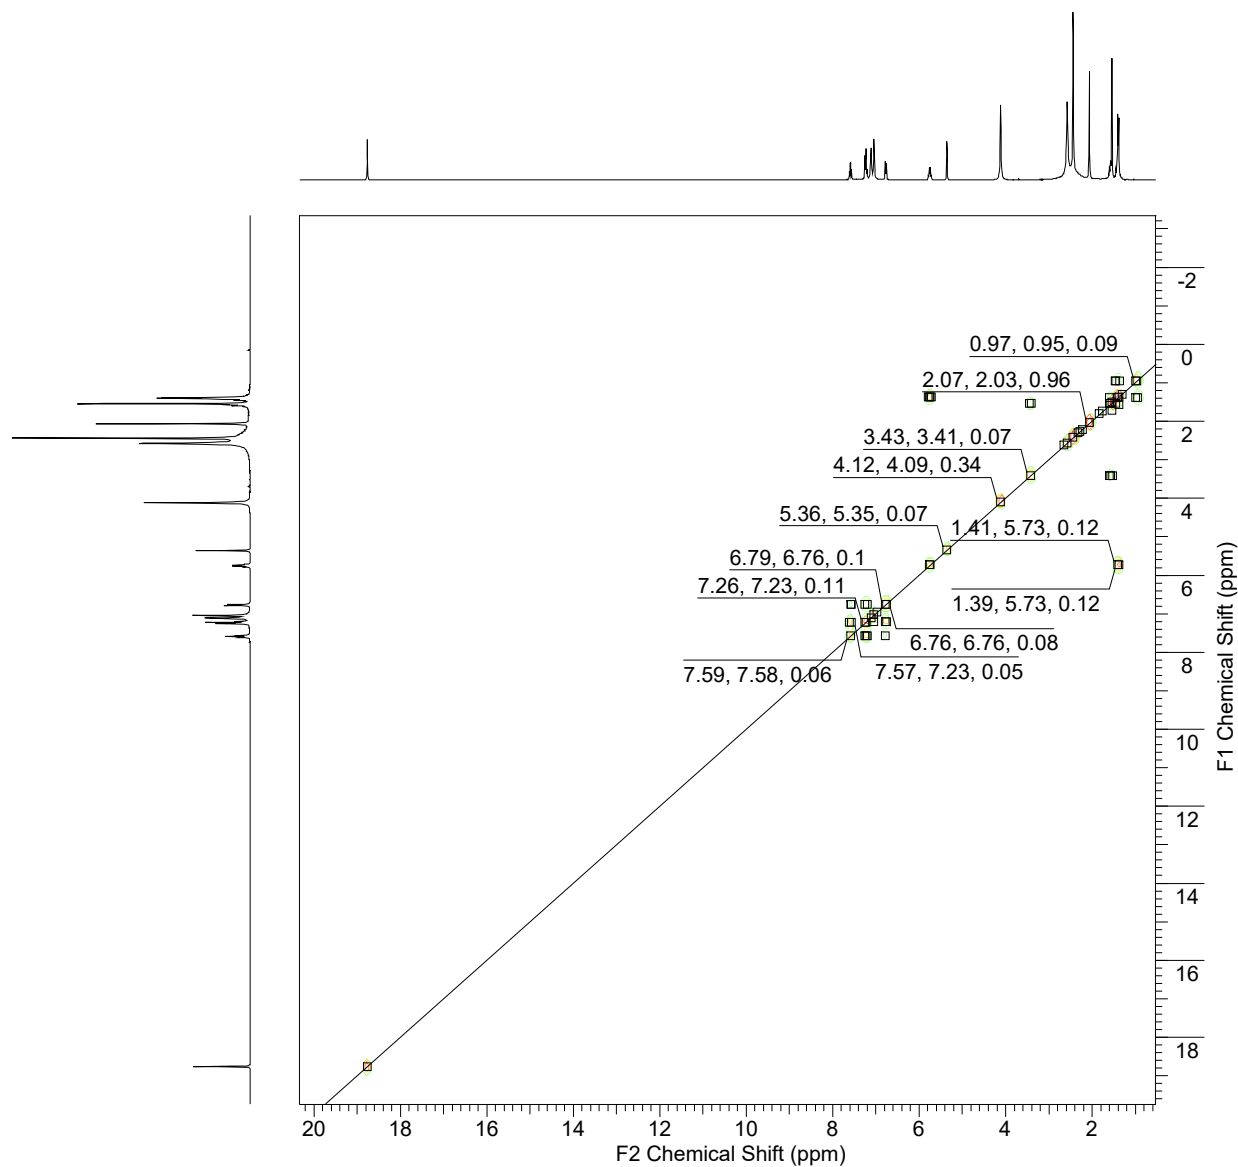

**4a**



# COSY spectrum of compound 4a

|                               |                                                                                |                               |                                       |                        |                      |
|-------------------------------|--------------------------------------------------------------------------------|-------------------------------|---------------------------------------|------------------------|----------------------|
| <b>Acquisition Time (sec)</b> | (0.3408, 0.0426)                                                               | <b>Comment</b>                | 5 mm PABBO BB-1H/D Z-GRD Z104275/0345 | <b>Date</b>            | 30 Apr 2019 17:10:26 |
| <b>File Name</b>              | C:\Users\Fedor\Desktop\Новые катализаторы от Ромы\FZ_Grubbs_7-K8\11\data\1\2rr |                               |                                       | <b>Frequency (MHz)</b> | (300.13, 300.13)     |
| <b>Nucleus</b>                | (1H, 1H)                                                                       | <b>Number of Transients</b>   | 1                                     | <b>Origin</b>          | spect                |
| <b>Owner</b>                  | nmr                                                                            | <b>Points Count</b>           | (8192, 1024)                          | <b>Pulse Sequence</b>  | cosygpgf             |
| <b>Sweep Width (Hz)</b>       | (9014.42, 9009.01)                                                             | <b>Temperature (degree C)</b> | 30.007                                | <b>Title</b>           | FZ_Grubbs_7-K8-COSY  |
| <b>Formula</b>                | C <sub>32</sub> H <sub>41</sub> Cl <sub>2</sub> N <sub>2</sub> Ru              | <b>FW</b>                     | 639.6629                              |                        |                      |

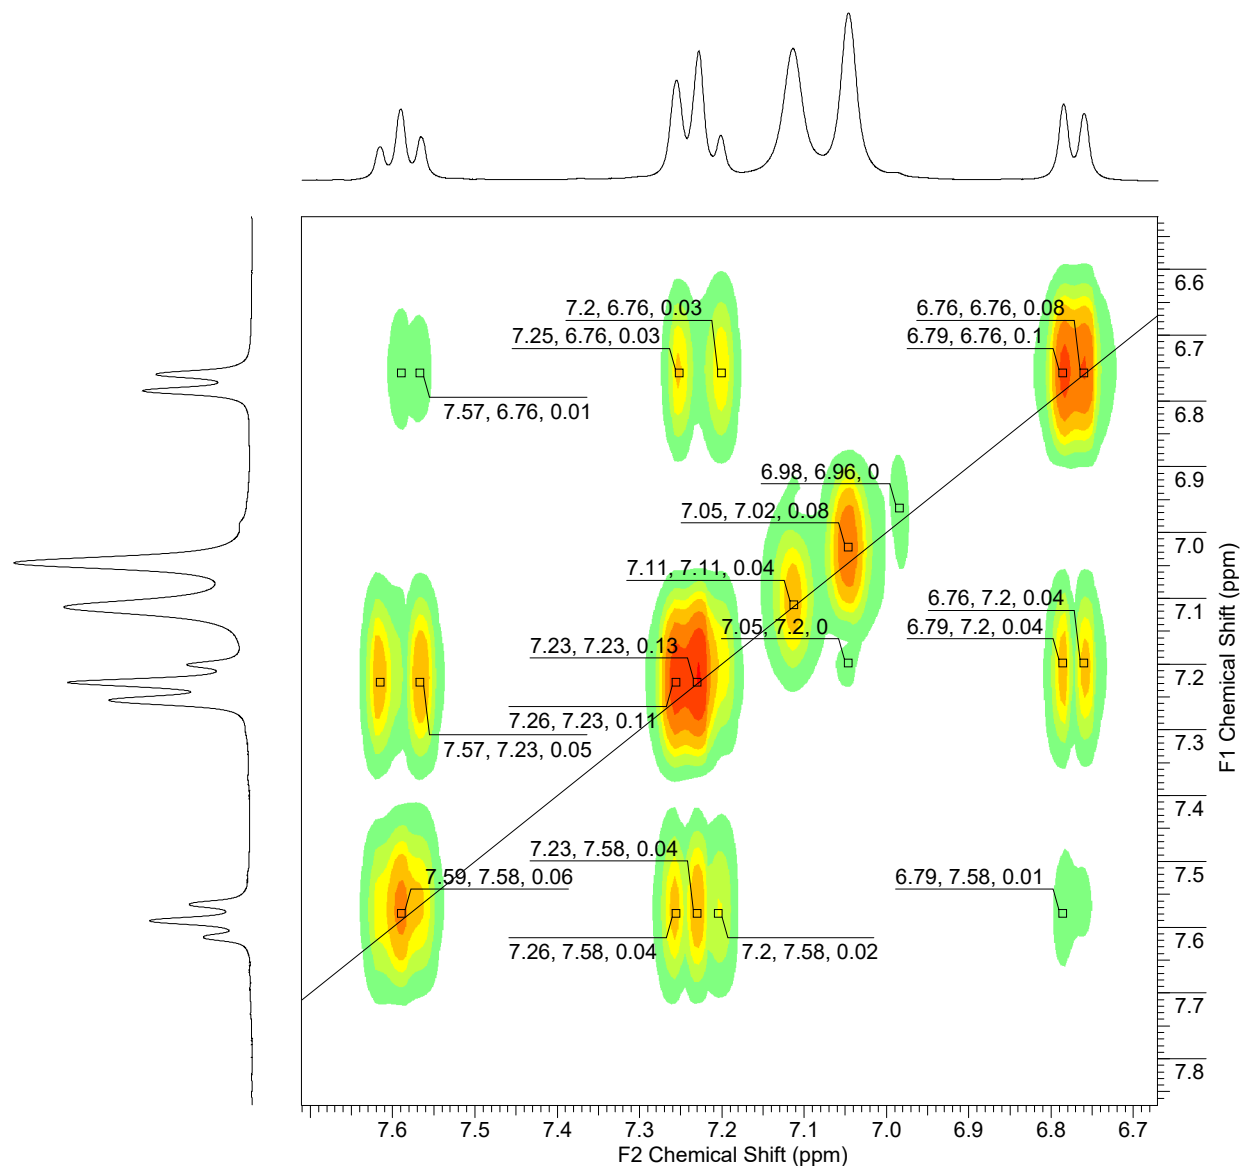

**4a**

# COSY spectrum of compound 4a

|                               |                                                                               |                               |                                       |                              |                      |
|-------------------------------|-------------------------------------------------------------------------------|-------------------------------|---------------------------------------|------------------------------|----------------------|
| <b>Acquisition Time (sec)</b> | (0.3408, 0.0426)                                                              | <b>Comment</b>                | 5 mm PABBO BB-1H/D Z-GRD Z104275/0345 | <b>Date</b>                  | 30 Apr 2019 17:10:26 |
| <b>File Name</b>              | C:\Users\Fedor\Desktop\Новые катализаторы от Ромы\FZ_Grubbs_7-K8\11\data\12rr | <b>Frequency (MHz)</b>        | (300.13, 300.13)                      | <b>Original Points Count</b> | (3072, 384)          |
| <b>Nucleus</b>                | (1H, 1H)                                                                      | <b>Number of Transients</b>   | 1                                     | <b>Origin</b>                | spect                |
| <b>Owner</b>                  | nmr                                                                           | <b>Points Count</b>           | (8192, 1024)                          | <b>Pulse Sequence</b>        | cosygpgf             |
| <b>Sweep Width (Hz)</b>       | (9014.42, 9009.01)                                                            | <b>Temperature (degree C)</b> | 30.007                                | <b>Solvent</b>               | CD2Cl2               |
| <b>Formula</b>                | C <sub>32</sub> H <sub>41</sub> Cl <sub>2</sub> N <sub>2</sub> Ru             | <b>FW</b>                     | 639.6629                              | <b>Title</b>                 | FZ_Grubbs_7-K8-COSY  |

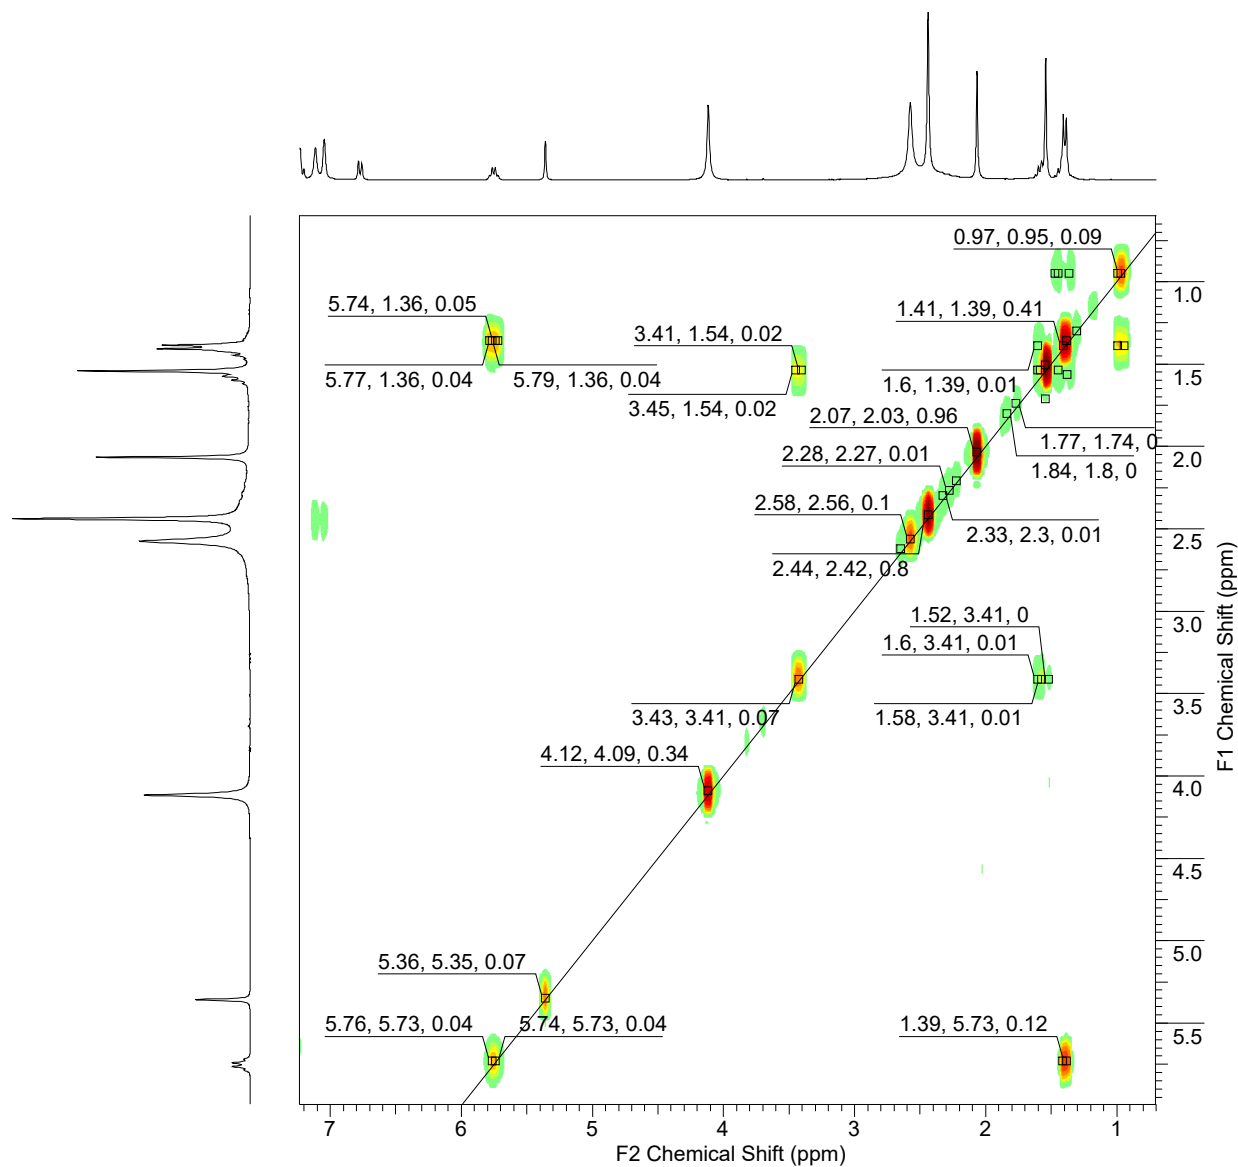

**4a**

# HSQC spectrum of compound 4a

|                               |                                                                                 |                               |                                       |                              |                      |
|-------------------------------|---------------------------------------------------------------------------------|-------------------------------|---------------------------------------|------------------------------|----------------------|
| <b>Acquisition Time (sec)</b> | (0.3408, 0.0089)                                                                | <b>Comment</b>                | 5 mm PABBO BB-1H/D Z-GRD Z104275/0345 | <b>Date</b>                  | 30 Apr 2019 17:07:58 |
| <b>File Name</b>              | C:\Users\Fedor\Desktop\Новые катализаторы от Ромы\FZ_Grubbs_7-K8\113\data\1\2rr | <b>Frequency (MHz)</b>        | (300.13, 75.48)                       | <b>Original Points Count</b> | (3072, 304)          |
| <b>Nucleus</b>                | (1H, 13C)                                                                       | <b>Number of Transients</b>   | 2                                     | <b>Origin</b>                | spect                |
| <b>Owner</b>                  | nmr                                                                             | <b>Points Count</b>           | (8192, 1024)                          | <b>Pulse Sequence</b>        | hsqcetgp             |
| <b>Sweep Width (Hz)</b>       | (9014.42, 34013.61)                                                             | <b>Temperature (degree C)</b> | 30.070                                | <b>Solvent</b>               | CD2Cl2               |
| <b>Title</b>                  | FZ_Grubbs_7-K8-HSQC [hp-dec]                                                    |                               |                                       |                              |                      |

|                |                                                                   |           |          |
|----------------|-------------------------------------------------------------------|-----------|----------|
| <b>Formula</b> | C <sub>32</sub> H <sub>41</sub> Cl <sub>2</sub> N <sub>2</sub> Ru | <b>FW</b> | 639.6629 |
|----------------|-------------------------------------------------------------------|-----------|----------|

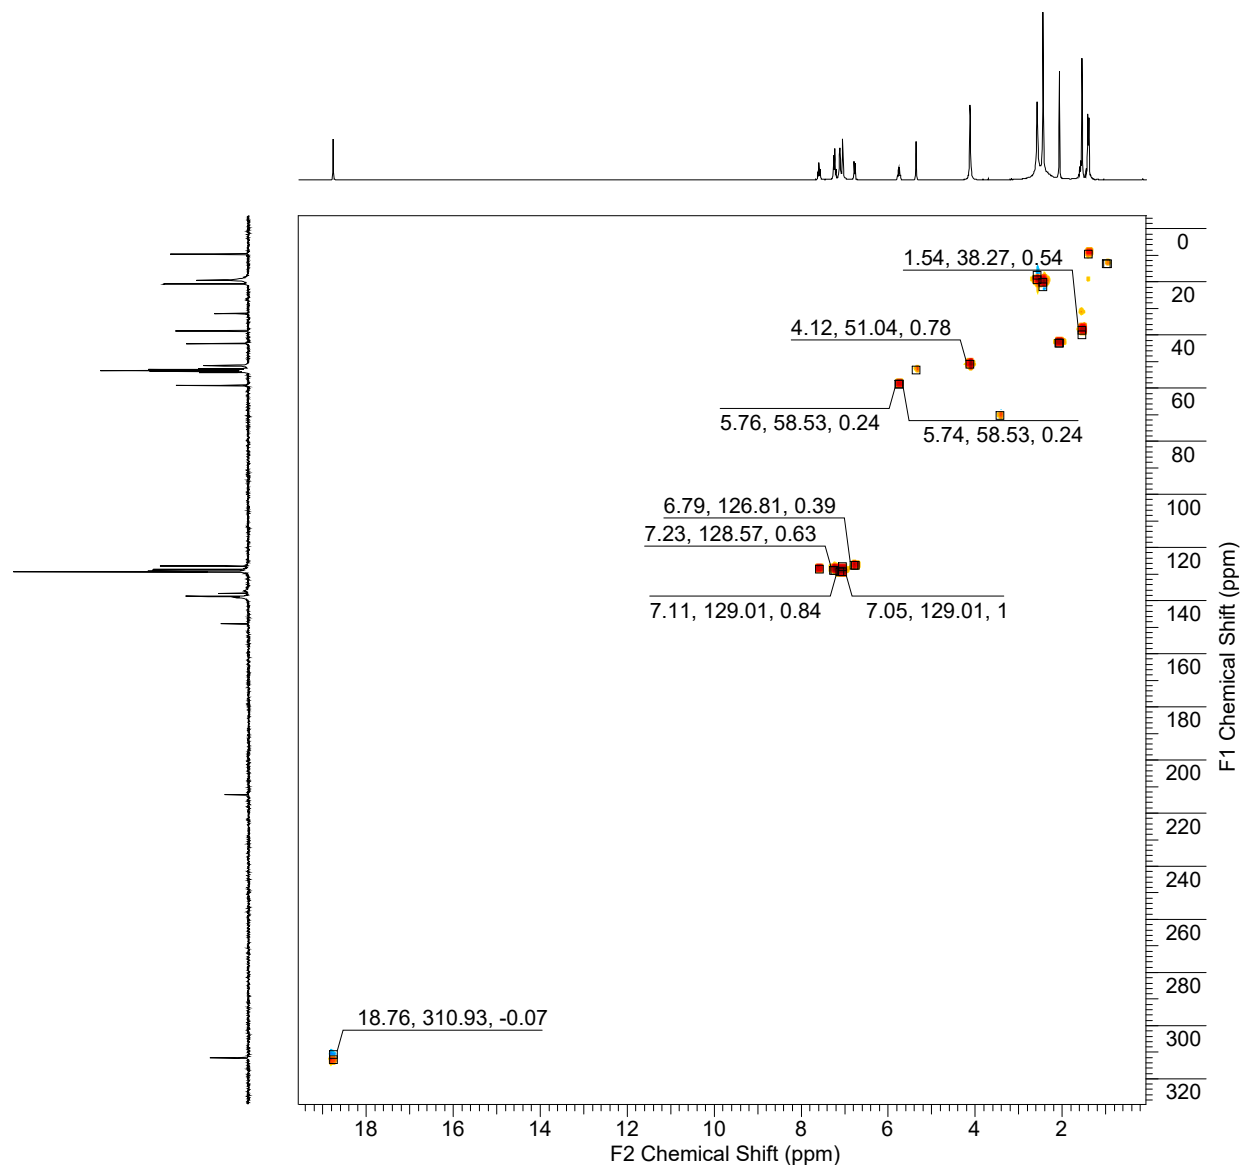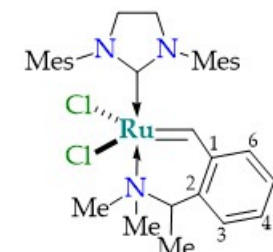

4a

# HSQC spectrum of compound 4a

|                               |                                                                                 |                               |                                       |                        |                              |
|-------------------------------|---------------------------------------------------------------------------------|-------------------------------|---------------------------------------|------------------------|------------------------------|
| <b>Acquisition Time (sec)</b> | (0.3408, 0.0089)                                                                | <b>Comment</b>                | 5 mm PABBO BB-1H/D Z-GRD Z104275/0345 | <b>Date</b>            | 30 Apr 2019 17:07:58         |
| <b>File Name</b>              | C:\Users\Fedor\Desktop\Новые катализаторы от Ромы\FZ_Grubbs_7-K8\113\data\1\2rr |                               |                                       | <b>Frequency (MHz)</b> | (300.13, 75.48)              |
| <b>Nucleus</b>                | (1H, 13C)                                                                       | <b>Number of Transients</b>   | 2                                     | <b>Origin</b>          | spect                        |
| <b>Owner</b>                  | nmr                                                                             | <b>Points Count</b>           | (8192, 1024)                          | <b>Pulse Sequence</b>  | hsqcetgp                     |
| <b>Sweep Width (Hz)</b>       | (9014.42, 34013.61)                                                             | <b>Temperature (degree C)</b> | 30.070                                | <b>Solvent</b>         | CD2Cl2                       |
|                               |                                                                                 |                               |                                       | <b>Title</b>           | FZ_Grubbs_7-K8-HSQC [hp-dec] |
| <b>Formula</b>                | C <sub>32</sub> H <sub>41</sub> Cl <sub>2</sub> N <sub>2</sub> Ru               | <b>FW</b>                     | 639.6629                              |                        |                              |

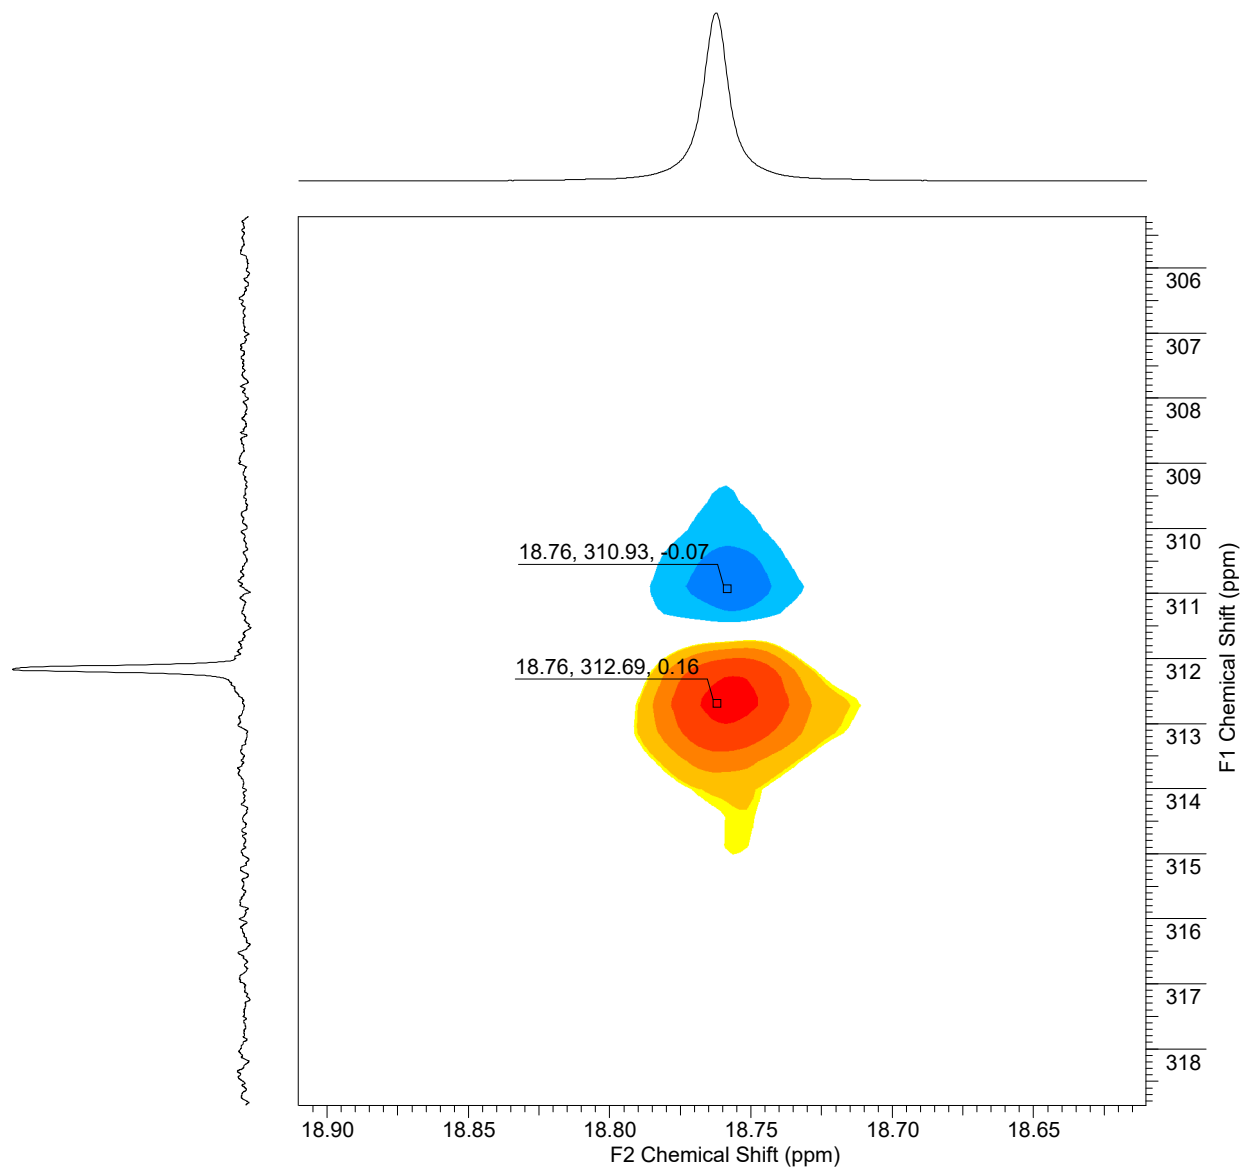

**4a**

# HSQC spectrum of compound 4a

|                               |                                                                                  |                               |                                       |                              |                              |
|-------------------------------|----------------------------------------------------------------------------------|-------------------------------|---------------------------------------|------------------------------|------------------------------|
| <b>Acquisition Time (sec)</b> | (0.3408, 0.0089)                                                                 | <b>Comment</b>                | 5 mm PABBO BB-1H/D Z-GRD Z104275/0345 | <b>Date</b>                  | 30 Apr 2019 17:07:58         |
| <b>File Name</b>              | C:\Users\Fedor\Desktop\Новые катализаторы от Ромы\FZ_Grubbs_7-K8\113\pdata\1\2rr | <b>Frequency (MHz)</b>        | (300.13, 75.48)                       | <b>Original Points Count</b> | (3072, 304)                  |
| <b>Nucleus</b>                | (1H, 13C)                                                                        | <b>Number of Transients</b>   | 2                                     | <b>Origin</b>                | spect                        |
| <b>Owner</b>                  | nmr                                                                              | <b>Points Count</b>           | (8192, 1024)                          | <b>Pulse Sequence</b>        | hsqcetgp                     |
| <b>Sweep Width (Hz)</b>       | (9014.42, 34013.61)                                                              | <b>Temperature (degree C)</b> | 30.070                                | <b>Solvent</b>               | CD2Cl2                       |
| <b>Formula</b>                | C <sub>32</sub> H <sub>41</sub> Cl <sub>2</sub> N <sub>2</sub> Ru                | <b>FW</b>                     | 639.6629                              | <b>Title</b>                 | FZ_Grubbs_7-K8-HSQC [hp-dec] |

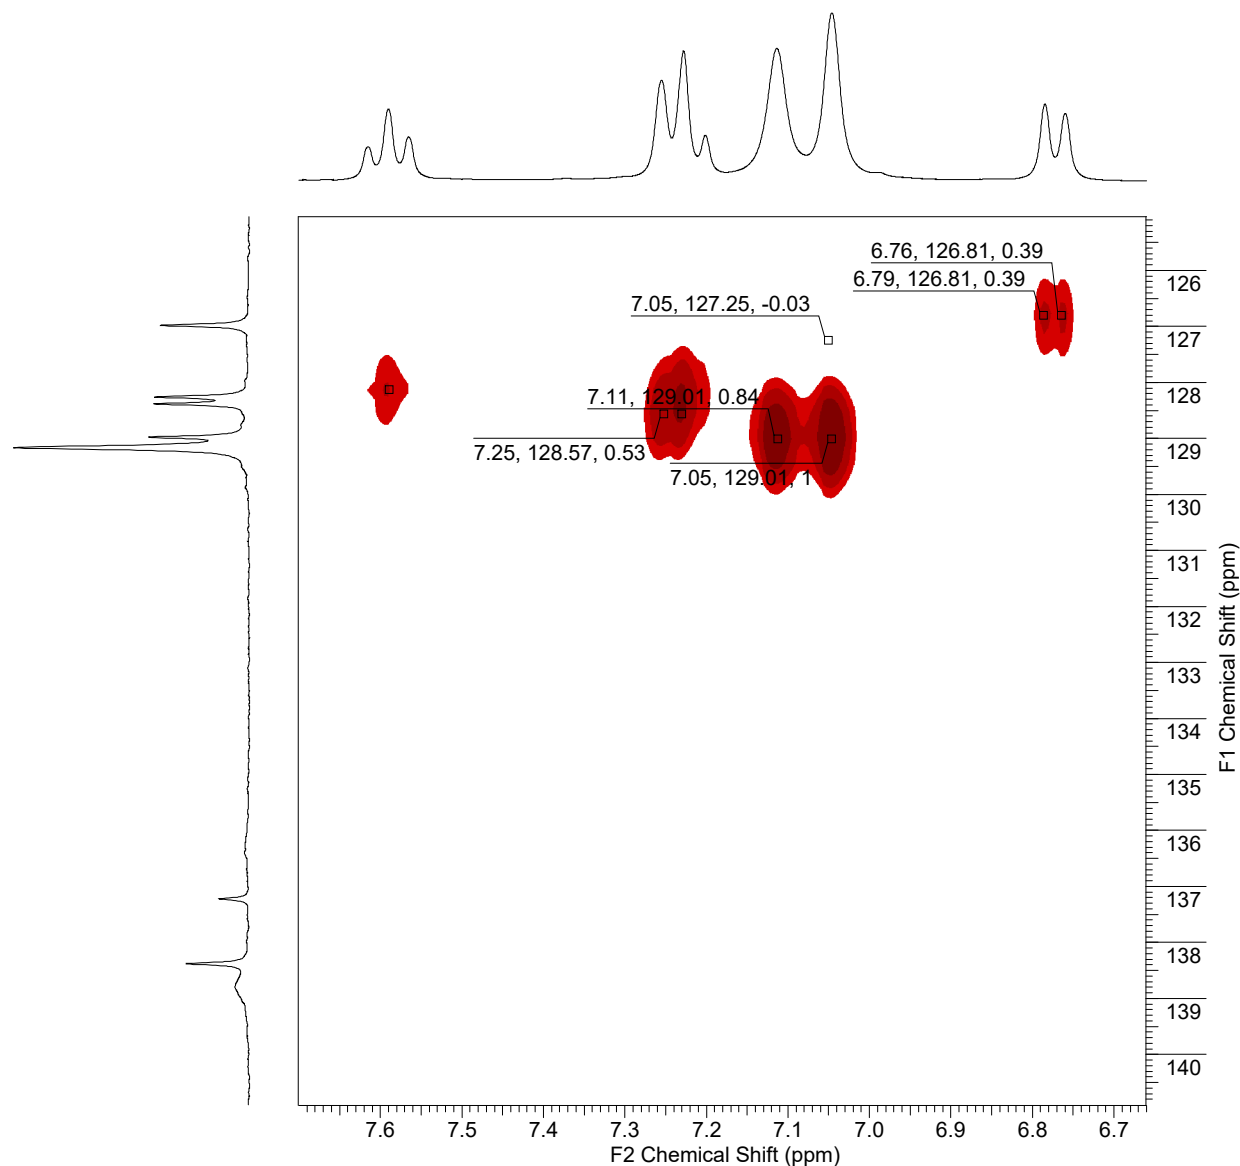

**4a**

# HSQC spectrum of compound 4a

|                               |                                                                                 |                               |                                       |                              |                      |
|-------------------------------|---------------------------------------------------------------------------------|-------------------------------|---------------------------------------|------------------------------|----------------------|
| <b>Acquisition Time (sec)</b> | (0.3408, 0.0089)                                                                | <b>Comment</b>                | 5 mm PABBO BB-1H/D Z-GRD Z104275/0345 | <b>Date</b>                  | 30 Apr 2019 17:07:58 |
| <b>File Name</b>              | C:\Users\Fedor\Desktop\Новые катализаторы от Ромы\FZ_Grubbs_7-K8\113\data\1\2rr | <b>Frequency (MHz)</b>        | (300.13, 75.48)                       | <b>Original Points Count</b> | (3072, 304)          |
| <b>Nucleus</b>                | (1H, 13C)                                                                       | <b>Number of Transients</b>   | 2                                     | <b>Origin</b>                | spect                |
| <b>Owner</b>                  | nmr                                                                             | <b>Points Count</b>           | (8192, 1024)                          | <b>Pulse Sequence</b>        | hsqcetgp             |
| <b>Sweep Width (Hz)</b>       | (9014.42, 34013.61)                                                             | <b>Temperature (degree C)</b> | 30.070                                | <b>Solvent</b>               | CD2Cl2               |
| <b>Title</b>                  | FZ_Grubbs_7-K8-HSQC [hp-dec]                                                    |                               |                                       |                              |                      |
| <b>Formula</b>                | C <sub>32</sub> H <sub>41</sub> Cl <sub>2</sub> N <sub>2</sub> Ru               | <b>FW</b>                     | 639.6629                              |                              |                      |

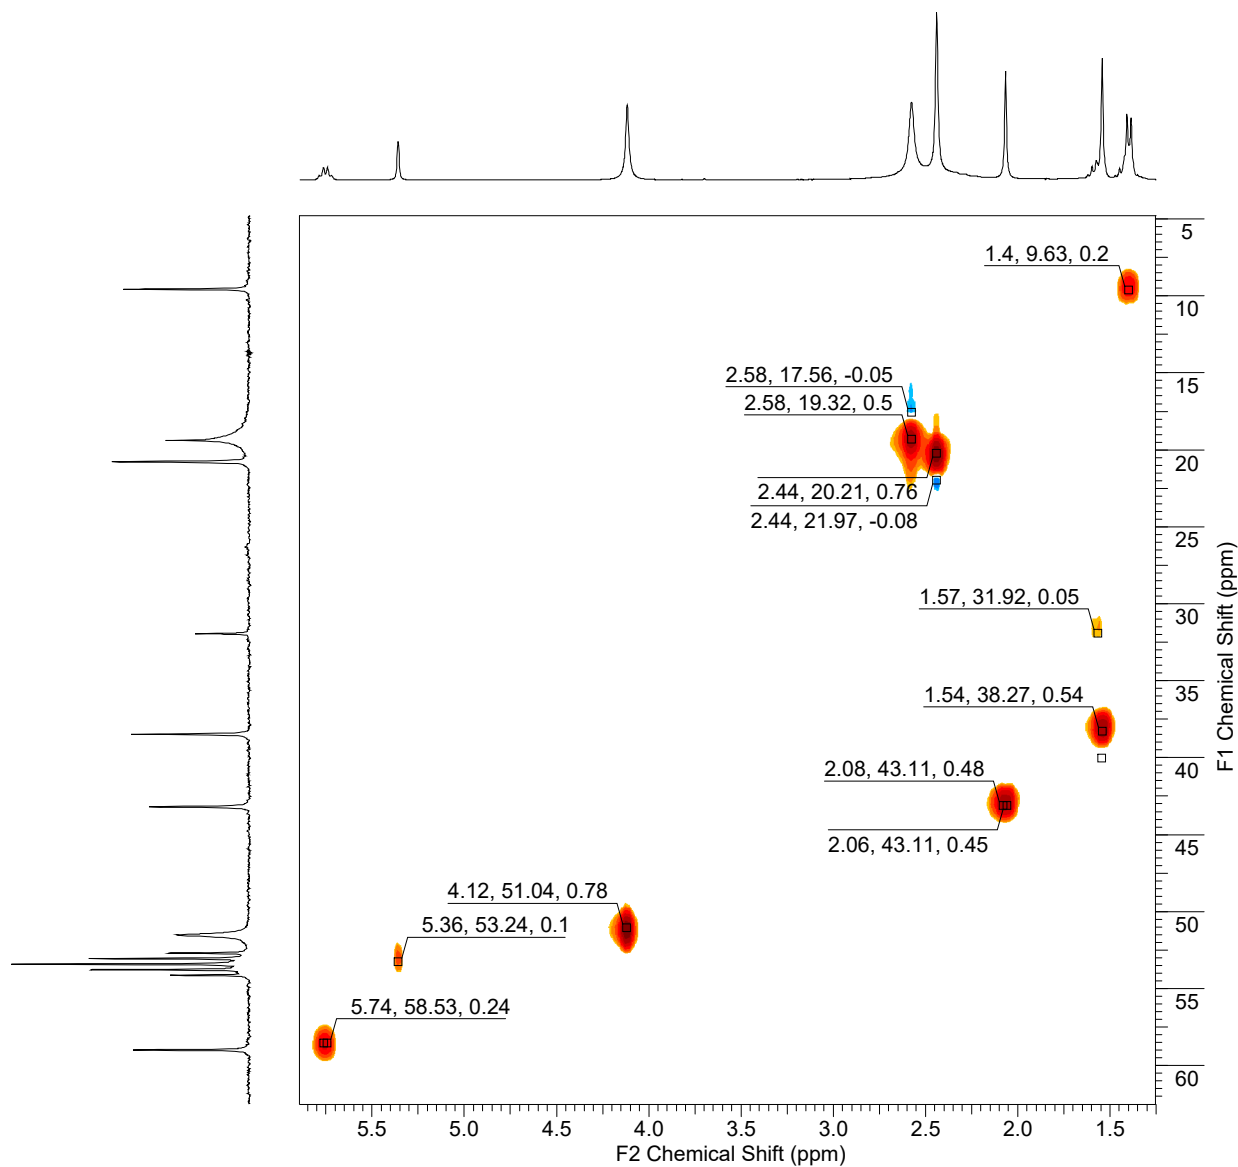

**4a**

# HMBC spectrum of compound 4a

|                               |                                                                                 |                               |                                       |                        |                      |
|-------------------------------|---------------------------------------------------------------------------------|-------------------------------|---------------------------------------|------------------------|----------------------|
| <b>Acquisition Time (sec)</b> | (0.3408, 0.0089)                                                                | <b>Comment</b>                | 5 mm PABBO BB-1H/D Z-GRD Z104275/0345 | <b>Date</b>            | 30 Apr 2019 17:09:48 |
| <b>File Name</b>              | C:\Users\Fedor\Desktop\Новые катализаторы от Ромы\FZ_Grubbs_7-K8\213\data\1\2rr |                               |                                       | <b>Frequency (MHz)</b> | (300.13, 75.48)      |
| <b>Nucleus</b>                | (1H, 13C)                                                                       | <b>Number of Transients</b>   | 4                                     | <b>Origin</b>          | spect                |
| <b>Owner</b>                  | nmr                                                                             | <b>Points Count</b>           | (8192, 1024)                          | <b>Pulse Sequence</b>  | hmbcgp1pndqf         |
| <b>Sweep Width (Hz)</b>       | (9014.42, 34013.61)                                                             | <b>Temperature (degree C)</b> | 29.520                                | <b>Title</b>           | FZ_Grubbs_7-K8-HMBC  |
| <b>Formula</b>                | C <sub>32</sub> H <sub>41</sub> Cl <sub>2</sub> N <sub>2</sub> Ru               | <b>FW</b>                     | 639.6629                              |                        |                      |

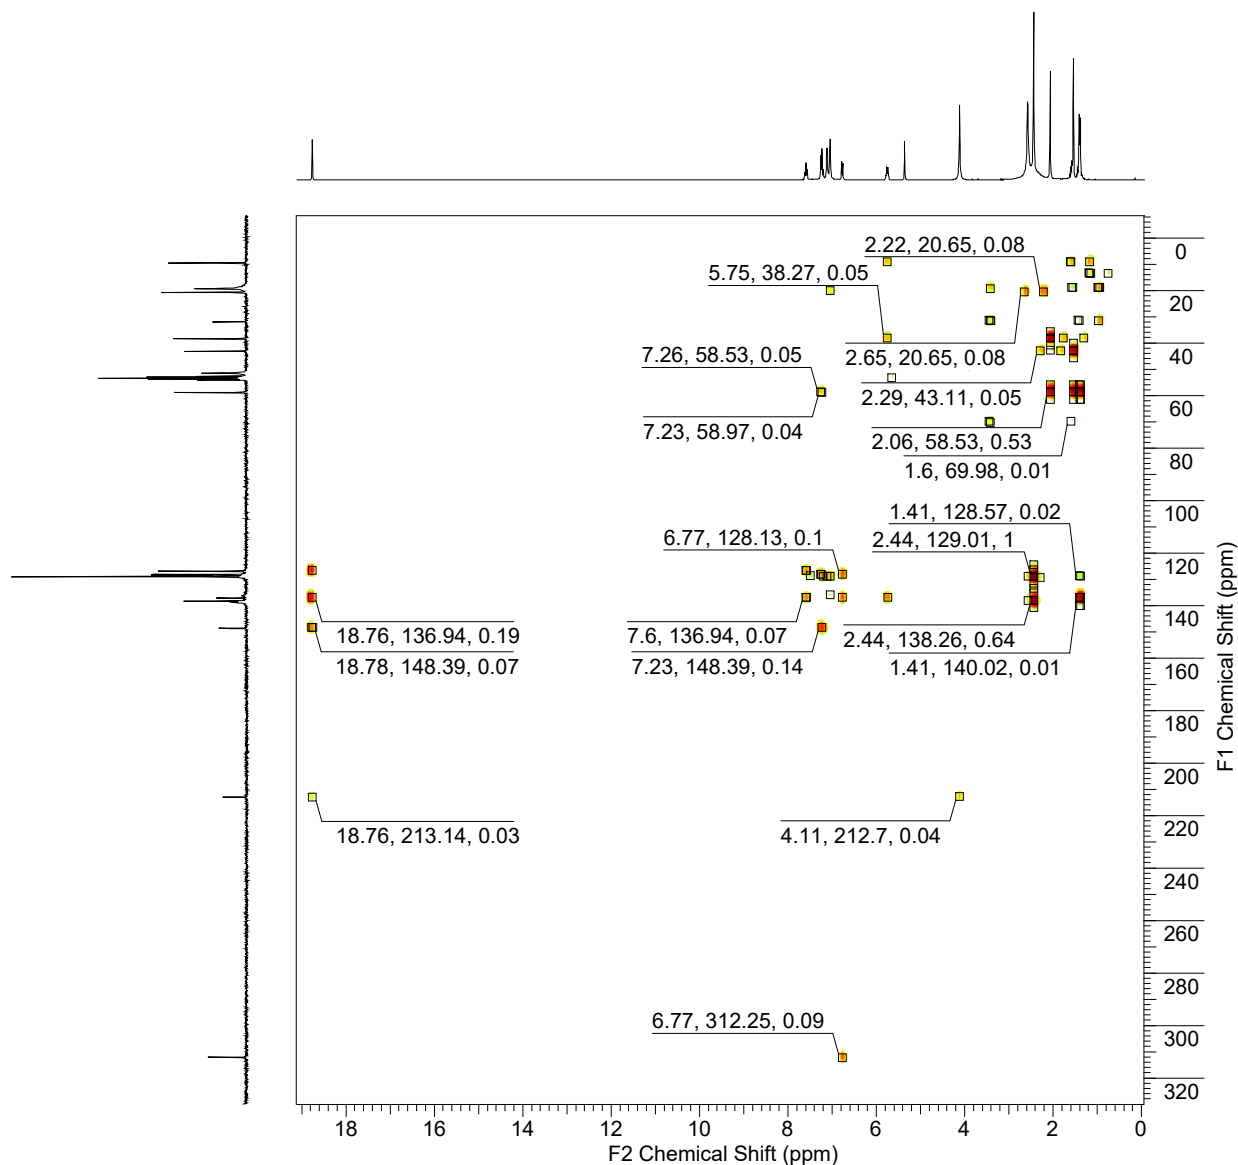

4a

# HMBC spectrum of compound 4a

|                               |                                                                                  |                               |                                       |                        |                      |
|-------------------------------|----------------------------------------------------------------------------------|-------------------------------|---------------------------------------|------------------------|----------------------|
| <b>Acquisition Time (sec)</b> | (0.3408, 0.0089)                                                                 | <b>Comment</b>                | 5 mm PABBO BB-1H/D Z-GRD Z104275/0345 | <b>Date</b>            | 30 Apr 2019 17:09:48 |
| <b>File Name</b>              | C:\Users\Fedor\Desktop\Новые катализаторы от Ромы\FZ_Grubbs_7-K8\213\pdata\1\2rr |                               |                                       | <b>Frequency (MHz)</b> | (300.13, 75.48)      |
| <b>Nucleus</b>                | (1H, 13C)                                                                        | <b>Number of Transients</b>   | 4                                     | <b>Origin</b>          | spect                |
| <b>Owner</b>                  | nmr                                                                              | <b>Points Count</b>           | (8192, 1024)                          | <b>Pulse Sequence</b>  | hmbcgplpndqf         |
| <b>Sweep Width (Hz)</b>       | (9014.42, 34013.61)                                                              | <b>Temperature (degree C)</b> | 29.520                                | <b>Title</b>           | FZ_Grubbs_7-K8-HMBC  |

|                |                                                                   |           |          |
|----------------|-------------------------------------------------------------------|-----------|----------|
| <b>Formula</b> | C <sub>32</sub> H <sub>41</sub> Cl <sub>2</sub> N <sub>2</sub> Ru | <b>FW</b> | 639.6629 |
|----------------|-------------------------------------------------------------------|-----------|----------|

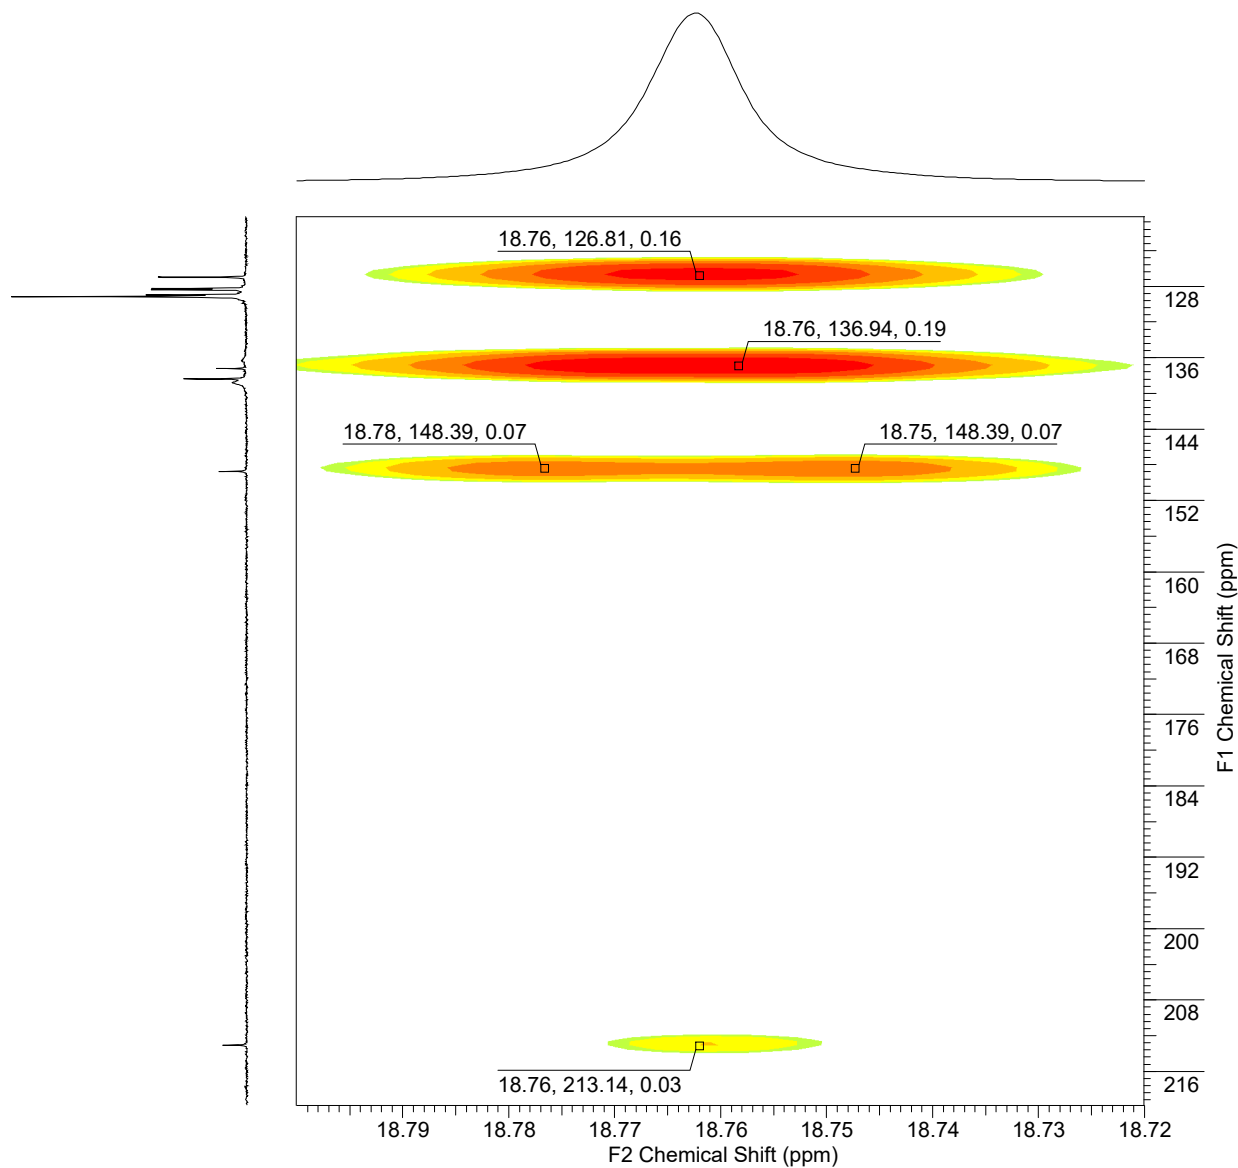

**4a**



# HMBC spectrum of compound 4a

|                        |                                                                                 |                        |                                       |                |                     |                       |             |
|------------------------|---------------------------------------------------------------------------------|------------------------|---------------------------------------|----------------|---------------------|-----------------------|-------------|
| Acquisition Time (sec) | (0.3408, 0.0089)                                                                | Comment                | 5 mm PABBO BB-1H/D Z-GRD Z104275/0345 |                | Date                | 30 Apr 2019 17:09:48  |             |
| File Name              | C:\Users\Fedor\Desktop\Новые катализаторы от Ромы\FZ_Grubbs_7-K8\213\data\1\2rr |                        |                                       |                | Frequency (MHz)     | (300.13, 75.48)       |             |
| Nucleus                | (1H, 13C)                                                                       | Number of Transients   | 4                                     | Origin         | spect               | Original Points Count | (3072, 304) |
| Owner                  | nmr                                                                             | Points Count           | (8192, 1024)                          | Pulse Sequence | hmbcgplpndqf        | Solvent               | CD2Cl2      |
| Sweep Width (Hz)       | (9014.42, 34013.61)                                                             | Temperature (degree C) | 29.520                                | Title          | FZ_Grubbs_7-K8-HMBC |                       |             |

|                |                                                                   |           |          |
|----------------|-------------------------------------------------------------------|-----------|----------|
| <b>Formula</b> | C <sub>32</sub> H <sub>41</sub> Cl <sub>2</sub> N <sub>2</sub> Ru | <b>FW</b> | 639.6629 |
|----------------|-------------------------------------------------------------------|-----------|----------|

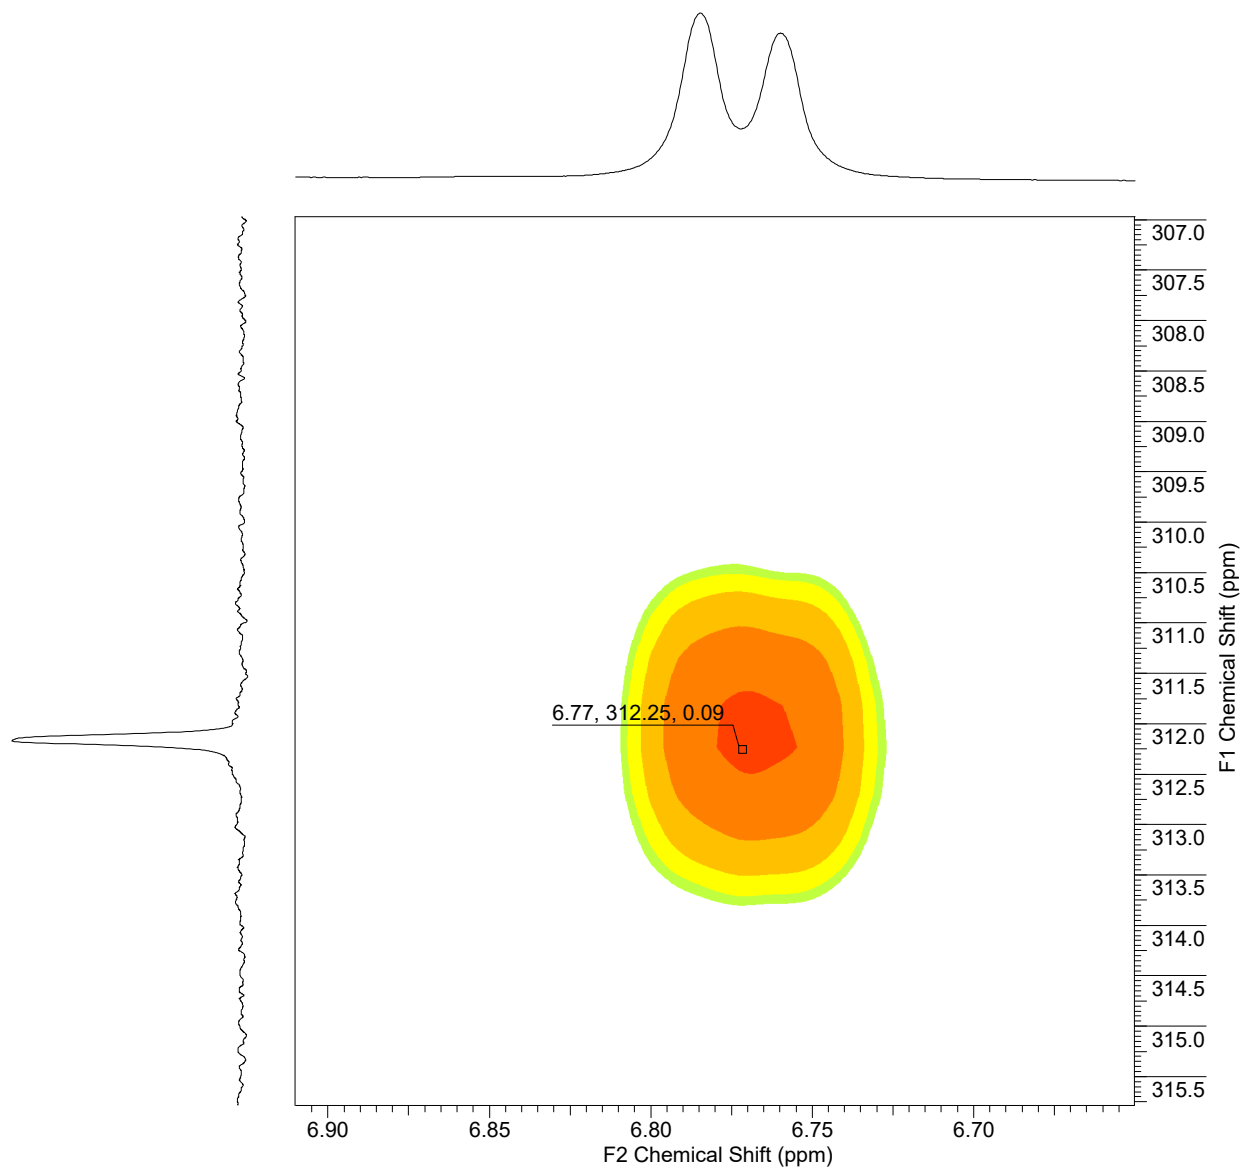

**4a**

# HMBC spectrum of compound 4a

|                        |                                                                                  |                        |                                       |                |                     |                       |             |
|------------------------|----------------------------------------------------------------------------------|------------------------|---------------------------------------|----------------|---------------------|-----------------------|-------------|
| Acquisition Time (sec) | (0.3408, 0.0089)                                                                 | Comment                | 5 mm PABBO BB-1H/D Z-GRD Z104275/0345 |                | Date                | 30 Apr 2019 17:09:48  |             |
| File Name              | C:\Users\Fedor\Desktop\Новые катализаторы от Ромы\FZ_Grubbs_7-K8\213\pdata\1\2rr |                        |                                       |                | Frequency (MHz)     | (300.13, 75.48)       |             |
| Nucleus                | (1H, 13C)                                                                        | Number of Transients   | 4                                     | Origin         | spect               | Original Points Count | (3072, 304) |
| Owner                  | nmr                                                                              | Points Count           | (8192, 1024)                          | Pulse Sequence | hmbcgplpndqf        | Solvent               | CD2Cl2      |
| Sweep Width (Hz)       | (9014.42, 34013.61)                                                              | Temperature (degree C) | 29.520                                | Title          | FZ_Grubbs_7-K8-HMBC |                       |             |
| Formula                | C <sub>32</sub> H <sub>41</sub> Cl <sub>2</sub> N <sub>2</sub> Ru                | FW                     | 639.6629                              |                |                     |                       |             |

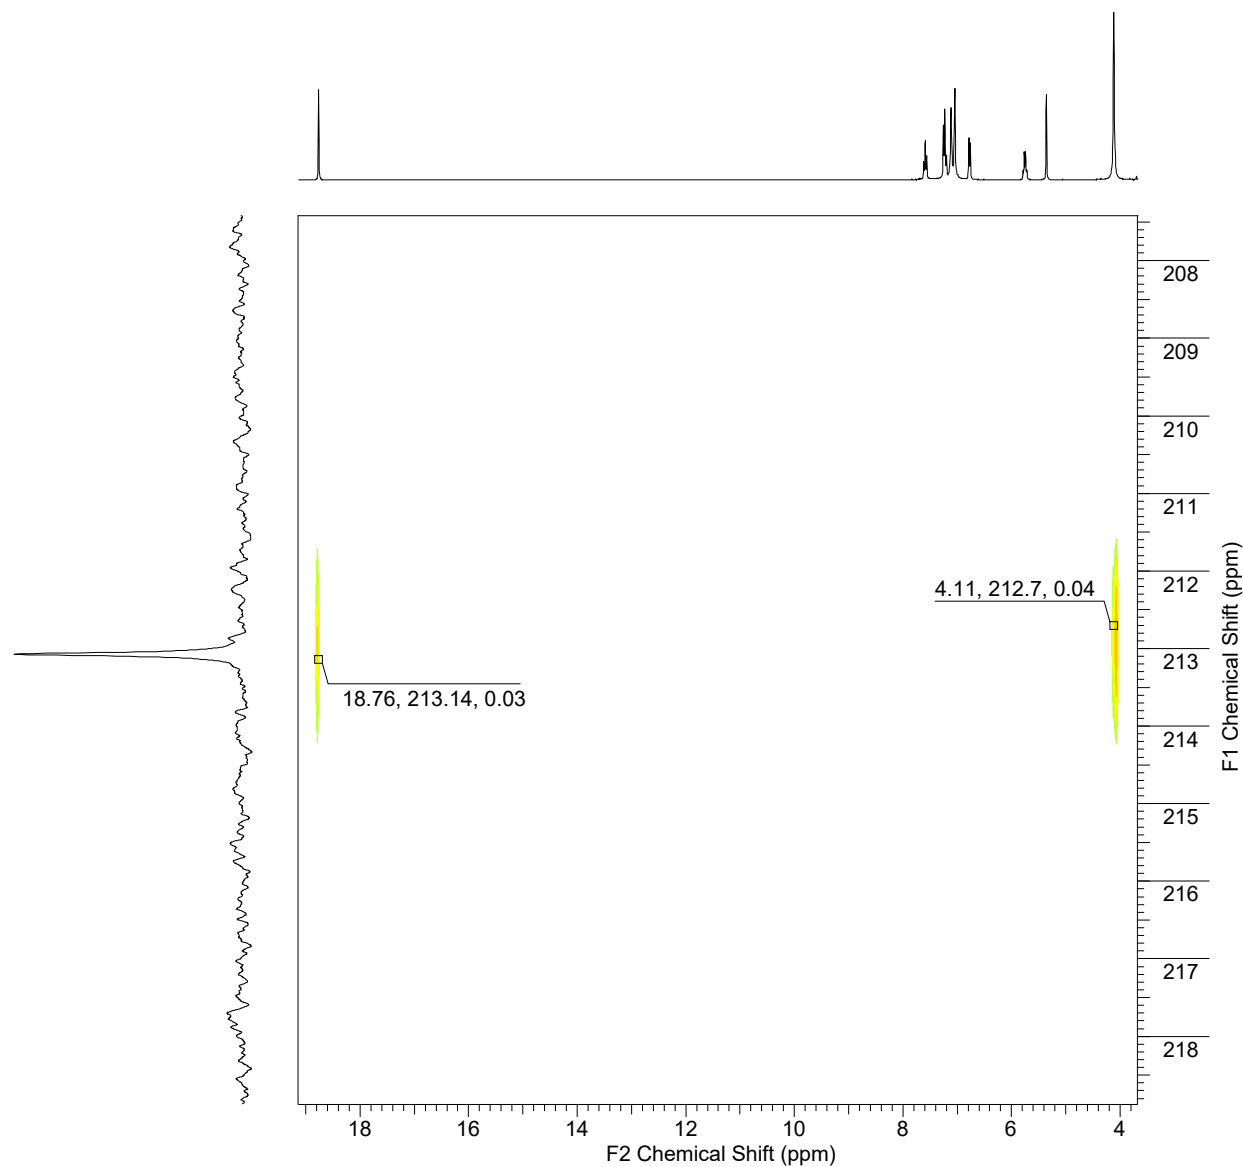

**4a**

# HMBC spectrum of compound 4a

|                               |                                                                                 |                               |                                       |                        |                      |
|-------------------------------|---------------------------------------------------------------------------------|-------------------------------|---------------------------------------|------------------------|----------------------|
| <b>Acquisition Time (sec)</b> | (0.3408, 0.0089)                                                                | <b>Comment</b>                | 5 mm PABBO BB-1H/D Z-GRD Z104275/0345 | <b>Date</b>            | 30 Apr 2019 17:09:48 |
| <b>File Name</b>              | C:\Users\Fedor\Desktop\Новые катализаторы от Ромы\FZ_Grubbs_7-K8\213\data\1\2rr |                               |                                       | <b>Frequency (MHz)</b> | (300.13, 75.48)      |
| <b>Nucleus</b>                | (1H, 13C)                                                                       | <b>Number of Transients</b>   | 4                                     | <b>Origin</b>          | spect                |
| <b>Owner</b>                  | nmr                                                                             | <b>Points Count</b>           | (8192, 1024)                          | <b>Pulse Sequence</b>  | hmbcgp1pndqf         |
| <b>Sweep Width (Hz)</b>       | (9014.42, 34013.61)                                                             | <b>Temperature (degree C)</b> | 29.520                                | <b>Solvent</b>         | CD2Cl2               |
| <b>Title</b>                  | FZ_Grubbs_7-K8-HMBC                                                             |                               |                                       |                        |                      |
| <b>Formula</b>                | C <sub>32</sub> H <sub>41</sub> Cl <sub>2</sub> N <sub>2</sub> Ru               |                               | <b>FW</b>                             | 639.6629               |                      |

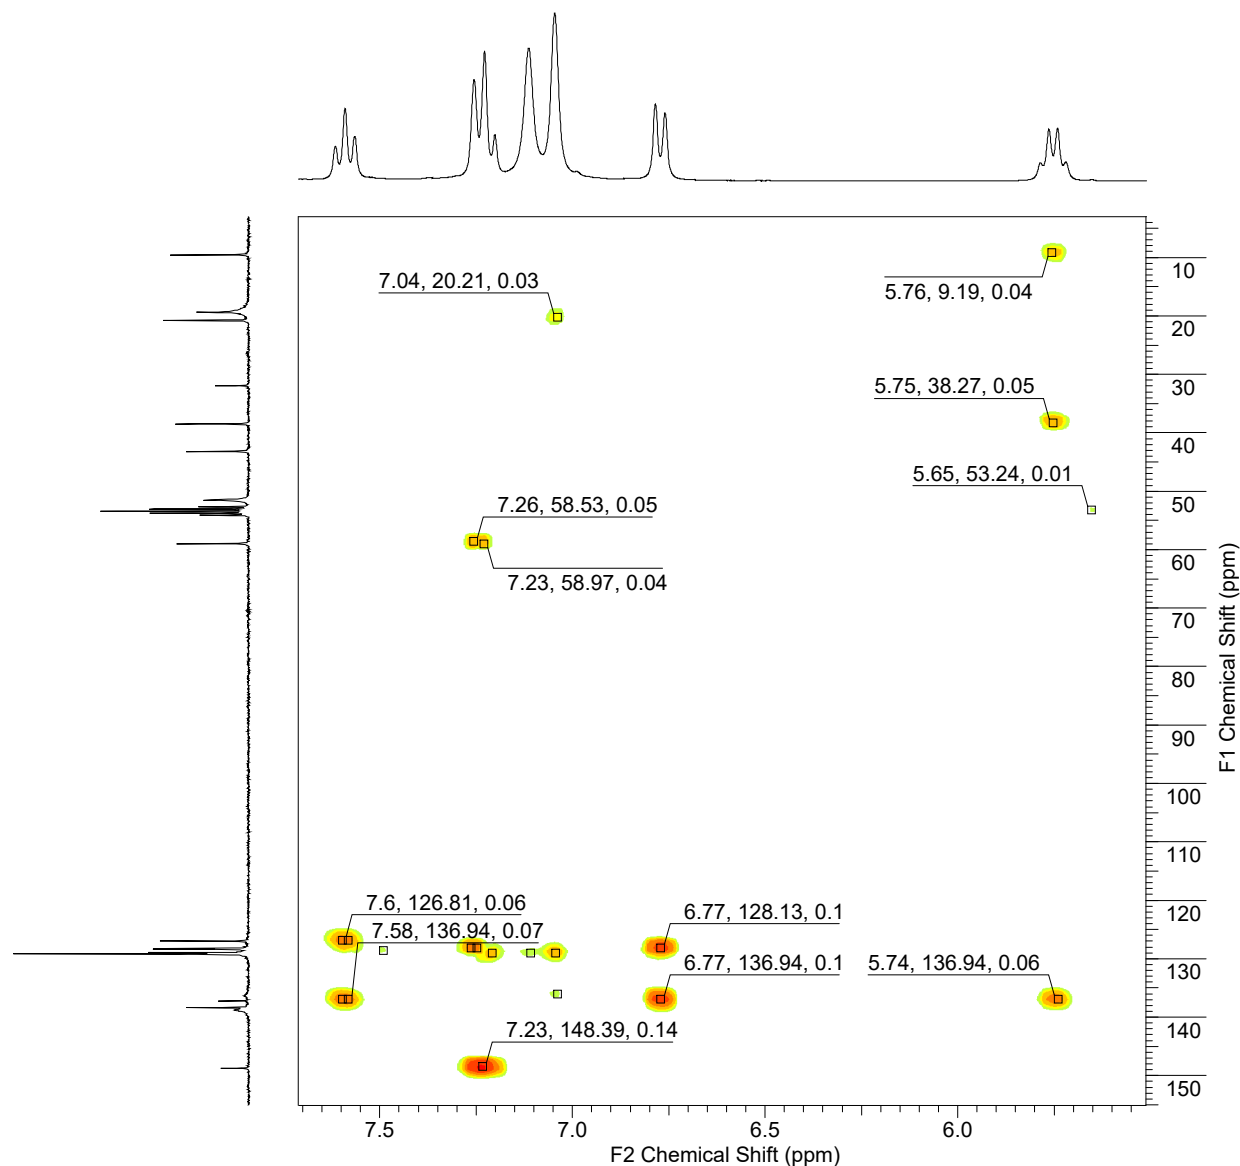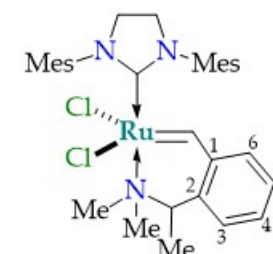

**4a**

# HMBC spectrum of compound 4a

|                               |                                                                                 |                               |                                       |                        |                      |
|-------------------------------|---------------------------------------------------------------------------------|-------------------------------|---------------------------------------|------------------------|----------------------|
| <b>Acquisition Time (sec)</b> | (0.3408, 0.0089)                                                                | <b>Comment</b>                | 5 mm PABBO BB-1H/D Z-GRD Z104275/0345 | <b>Date</b>            | 30 Apr 2019 17:09:48 |
| <b>File Name</b>              | C:\Users\Fedor\Desktop\Новые катализаторы от Ромы\FZ_Grubbs_7-K8\213\data\1\2rr |                               |                                       | <b>Frequency (MHz)</b> | (300.13, 75.48)      |
| <b>Nucleus</b>                | (1H, 13C)                                                                       | <b>Number of Transients</b>   | 4                                     | <b>Origin</b>          | spect                |
| <b>Owner</b>                  | nmr                                                                             | <b>Points Count</b>           | (8192, 1024)                          | <b>Pulse Sequence</b>  | hmbcgplpndqf         |
| <b>Sweep Width (Hz)</b>       | (9014.42, 34013.61)                                                             | <b>Temperature (degree C)</b> | 29.520                                | <b>Title</b>           | FZ_Grubbs_7-K8-HMBC  |

|                |                                                                   |           |          |
|----------------|-------------------------------------------------------------------|-----------|----------|
| <b>Formula</b> | C <sub>32</sub> H <sub>41</sub> Cl <sub>2</sub> N <sub>2</sub> Ru | <b>FW</b> | 639.6629 |
|----------------|-------------------------------------------------------------------|-----------|----------|

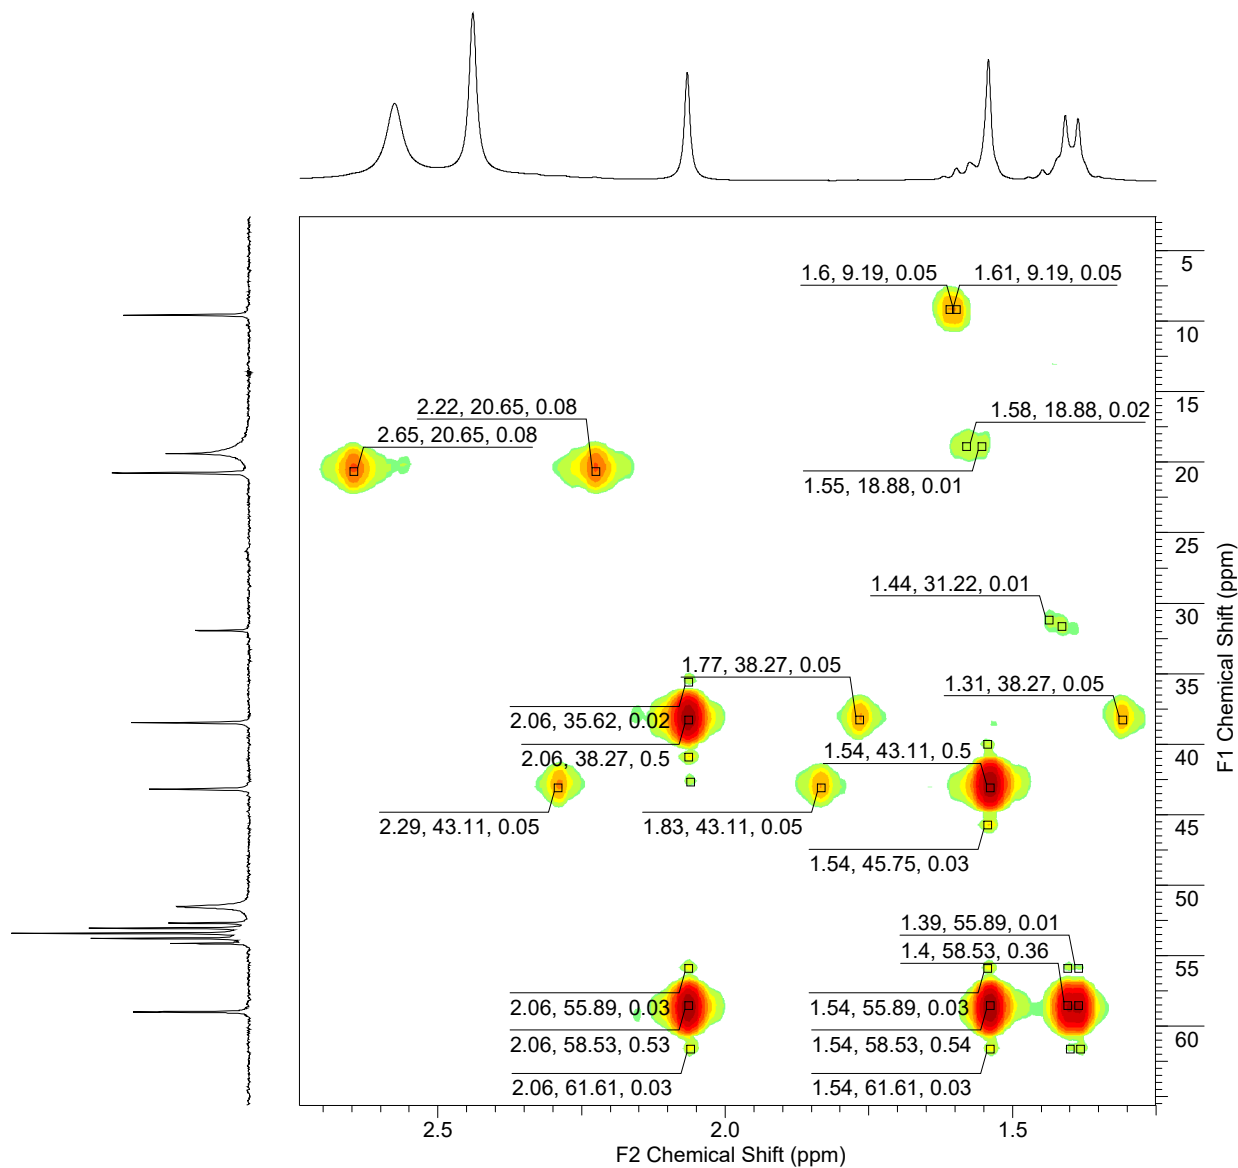

4a

IR spectrum of compound **6**. The plot shows Transmittance (%) on the y-axis (52 to 92) versus Wavenumber (cm<sup>-1</sup>) on the x-axis (4000 to 500). The spectrum is a red line with several sharp absorption peaks. Key peaks are labeled with their wavenumbers: 2899.94, 1394.71, 1254.40, 1181.99, 1042.21, and 576.25. An inset in the bottom left corner shows the chemical structure of compound **6**, which is a ruthenium complex. It features a central Ru atom coordinated by two chlorine atoms (Cl), a 1,3-dimethyl-4,5-dihydroimidazol-2-ylidene ligand, and a 2-methyl-2-phenyl-1,3-dimethyl-4,5-dihydroimidazol-2-ylidene ligand. The phenyl ring is numbered 1 to 6.

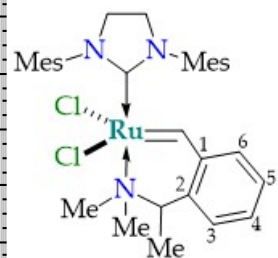

# $^1\text{H}$ spectrum of compound **4b**

|                        |                      |           |              |                      |                      |
|------------------------|----------------------|-----------|--------------|----------------------|----------------------|
| Acquisition Time (sec) | 1.9818               | Comment   | single pulse | Date                 | 14 Sep 2022 16:08:34 |
| Date Stamp             | 14 Sep 2022 15:53:41 | File Name |              |                      |                      |
| Frequency (MHz)        | 600.17               | Nucleus   | $^1\text{H}$ | Number of Transients | 8                    |
| Original Points Count  | 32768                | Owner     | CKP          | Points Count         | 32768                |
| Receiver Gain          | 44.00                | Solvent   | CHLOROFORM-d | Pulse Sequence       | single_pulse.ex2     |
| Sweep Width (Hz)       | 16534.39             |           |              | Spectrum Offset (Hz) | 5413.0830            |

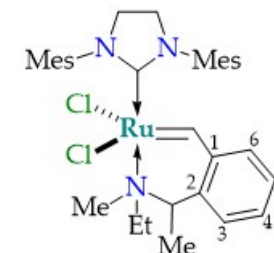

**4b**

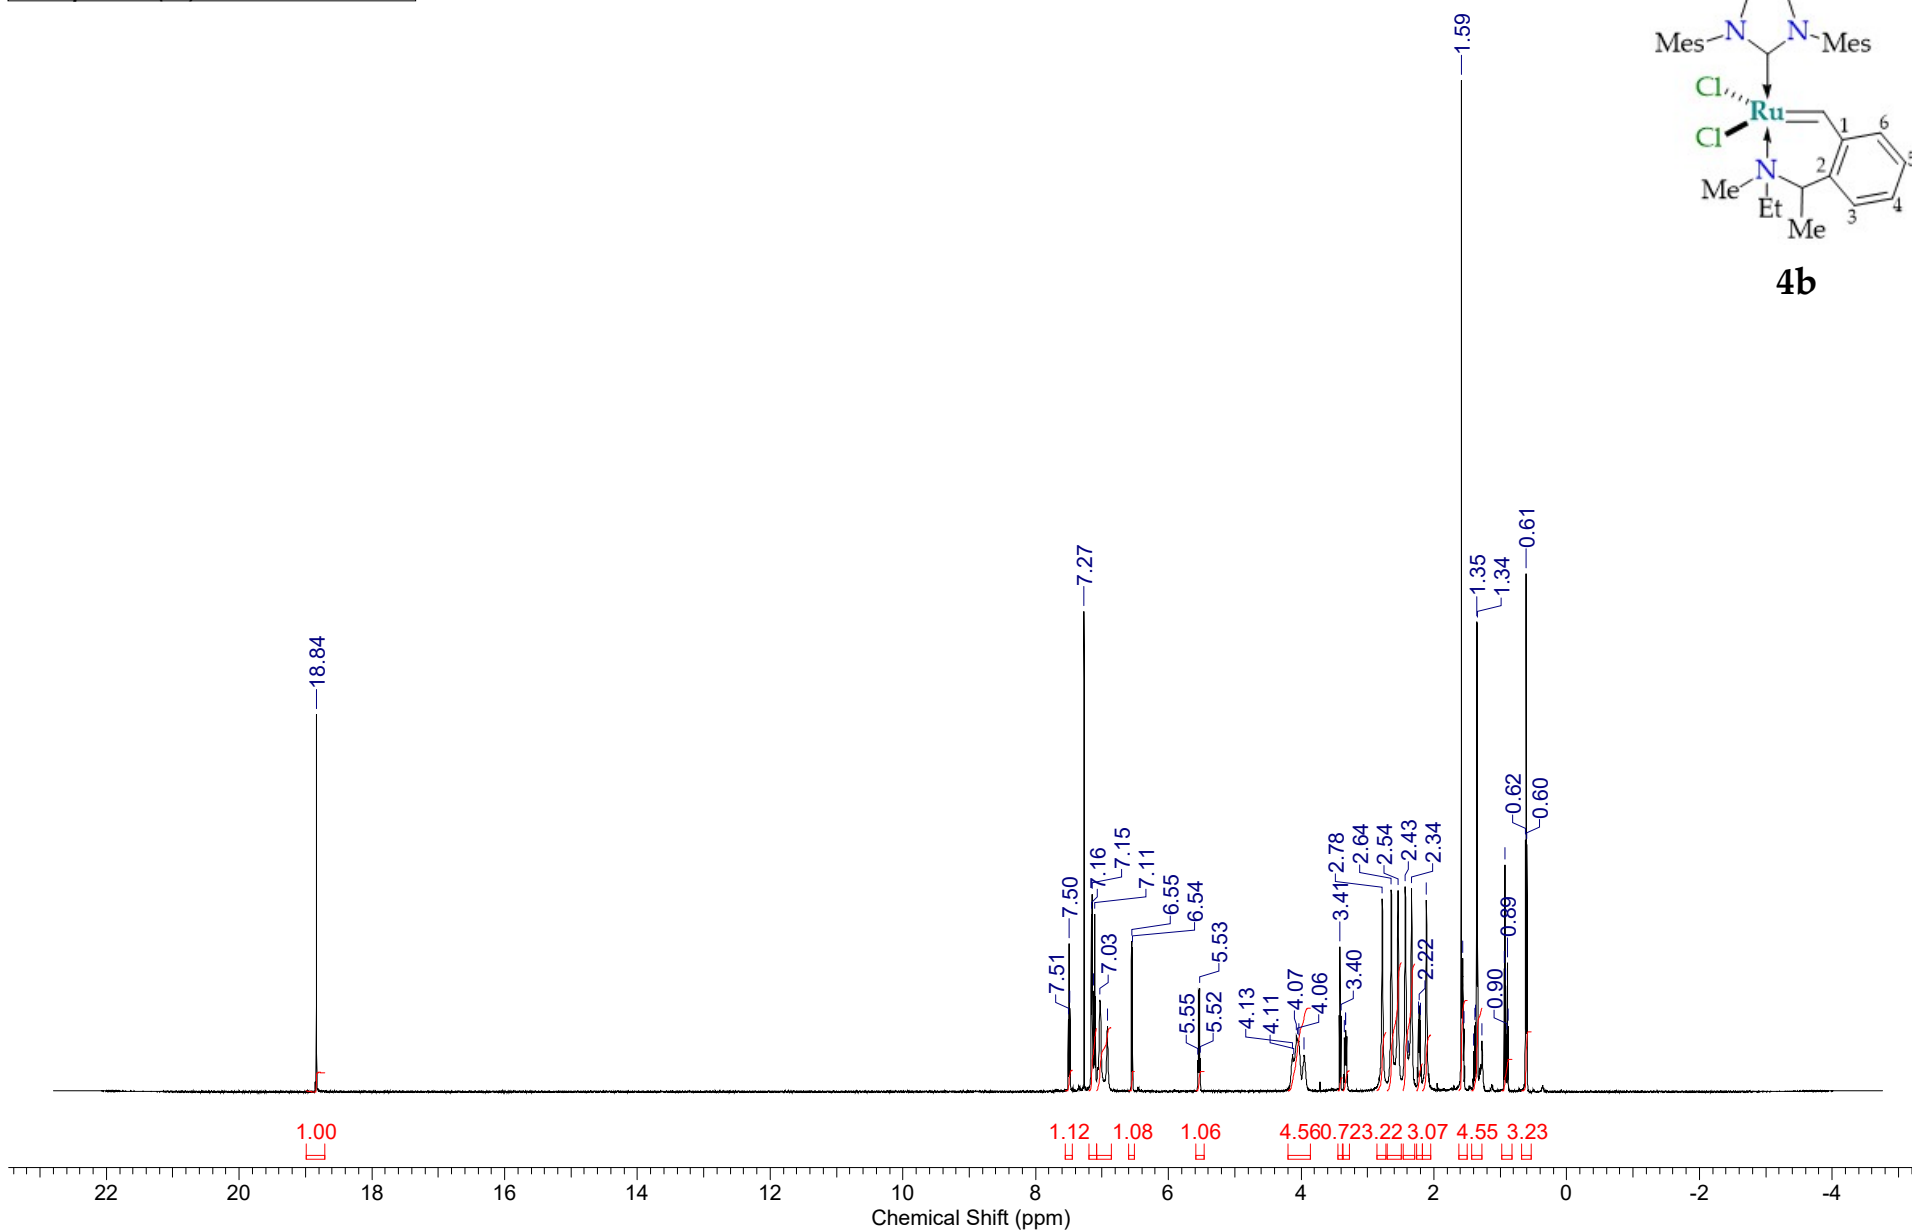

# $^1\text{H}$ spectrum of compound **4b**

|                        |                      |           |              |                      |                      |
|------------------------|----------------------|-----------|--------------|----------------------|----------------------|
| Acquisition Time (sec) | 1.9818               | Comment   | single pulse | Date                 | 14 Sep 2022 16:08:34 |
| Date Stamp             | 14 Sep 2022 15:53:41 | File Name |              |                      |                      |
| Frequency (MHz)        | 600.17               | Nucleus   | $^1\text{H}$ | Number of Transients | 8                    |
| Original Points Count  | 32768                | Owner     | CKP          | Points Count         | 32768                |
| Receiver Gain          | 44.00                | Solvent   | CHLOROFORM-d | Pulse Sequence       | single_pulse.ex2     |
| Sweep Width (Hz)       | 16534.39             |           |              | Spectrum Offset (Hz) | 5413.0830            |



**4b**

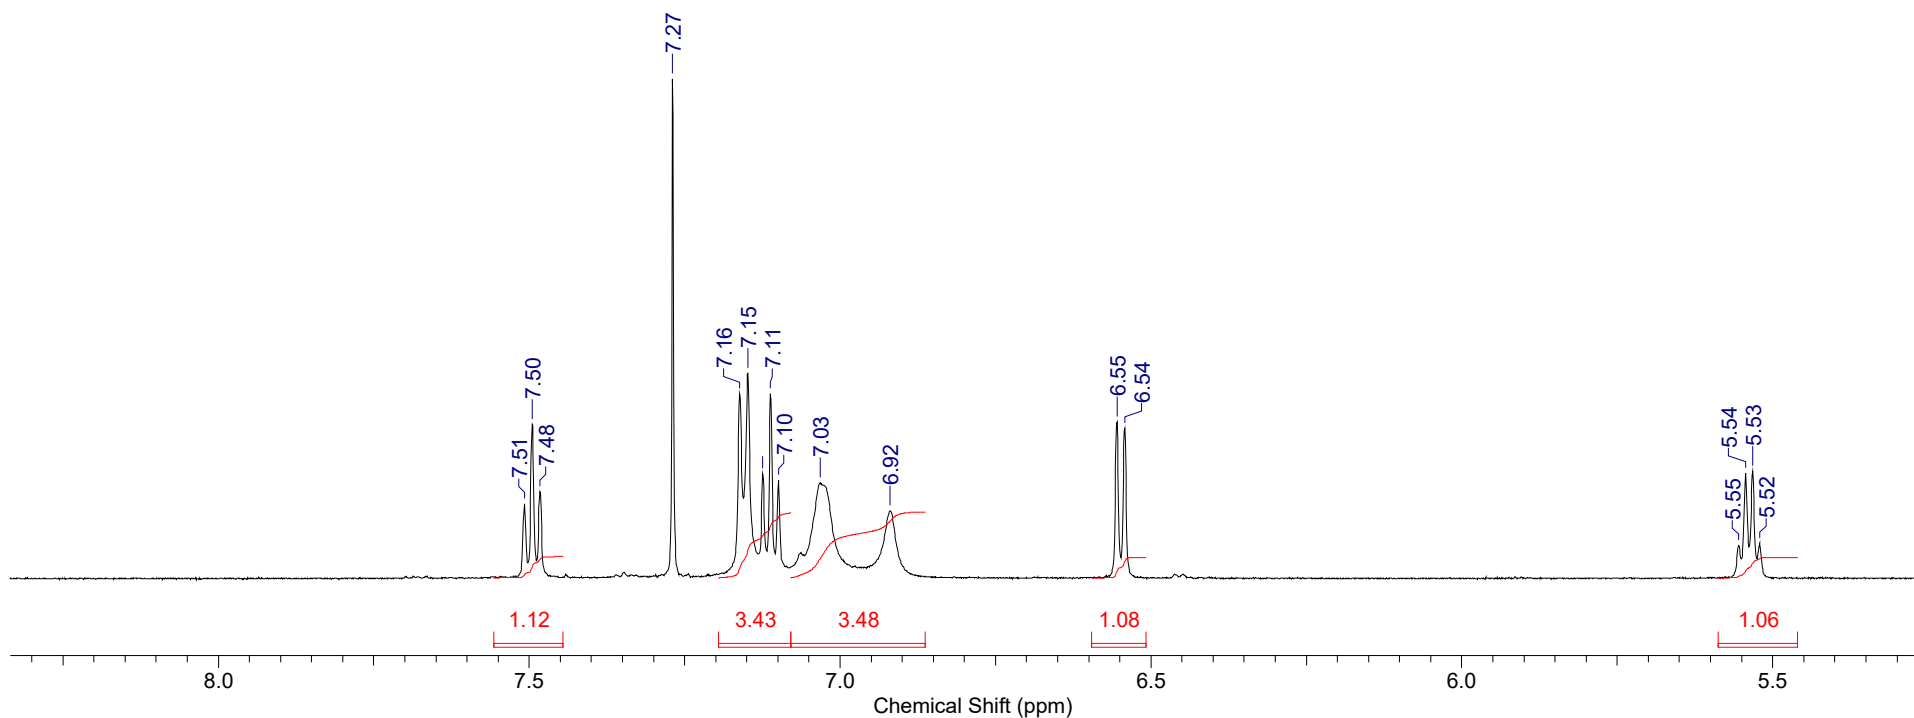

### <sup>1</sup>H spectrum of compound **4b**

|                               |                      |                |              |                             |                      |                             |                  |
|-------------------------------|----------------------|----------------|--------------|-----------------------------|----------------------|-----------------------------|------------------|
| <b>Acquisition Time (sec)</b> | 1.9818               | <b>Comment</b> | single_pulse | <b>Date</b>                 | 14 Sep 2022 16:08:34 |                             |                  |
| <b>Date Stamp</b>             | 14 Sep 2022 15:53:41 |                |              | <b>File Name</b>            |                      |                             |                  |
| <b>Frequency (MHz)</b>        | 600.17               | <b>Nucleus</b> | 1H           | <b>Number of Transients</b> | 8                    | <b>Origin</b>               | ECA 600          |
| <b>Original Points Count</b>  | 32768                | <b>Owner</b>   | CKP          | <b>Points Count</b>         | 32768                | <b>Pulse Sequence</b>       | single_pulse.ex2 |
| <b>Receiver Gain</b>          | 44.00                | <b>Solvent</b> | CHLOROFORM-d |                             |                      | <b>Spectrum Offset (Hz)</b> | 5413.0830        |
| <b>Sweep Width (Hz)</b>       | 16534.39             |                |              |                             |                      |                             |                  |

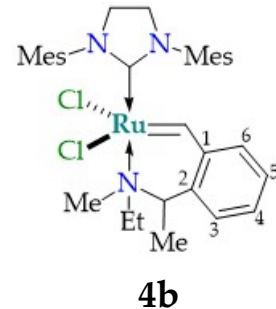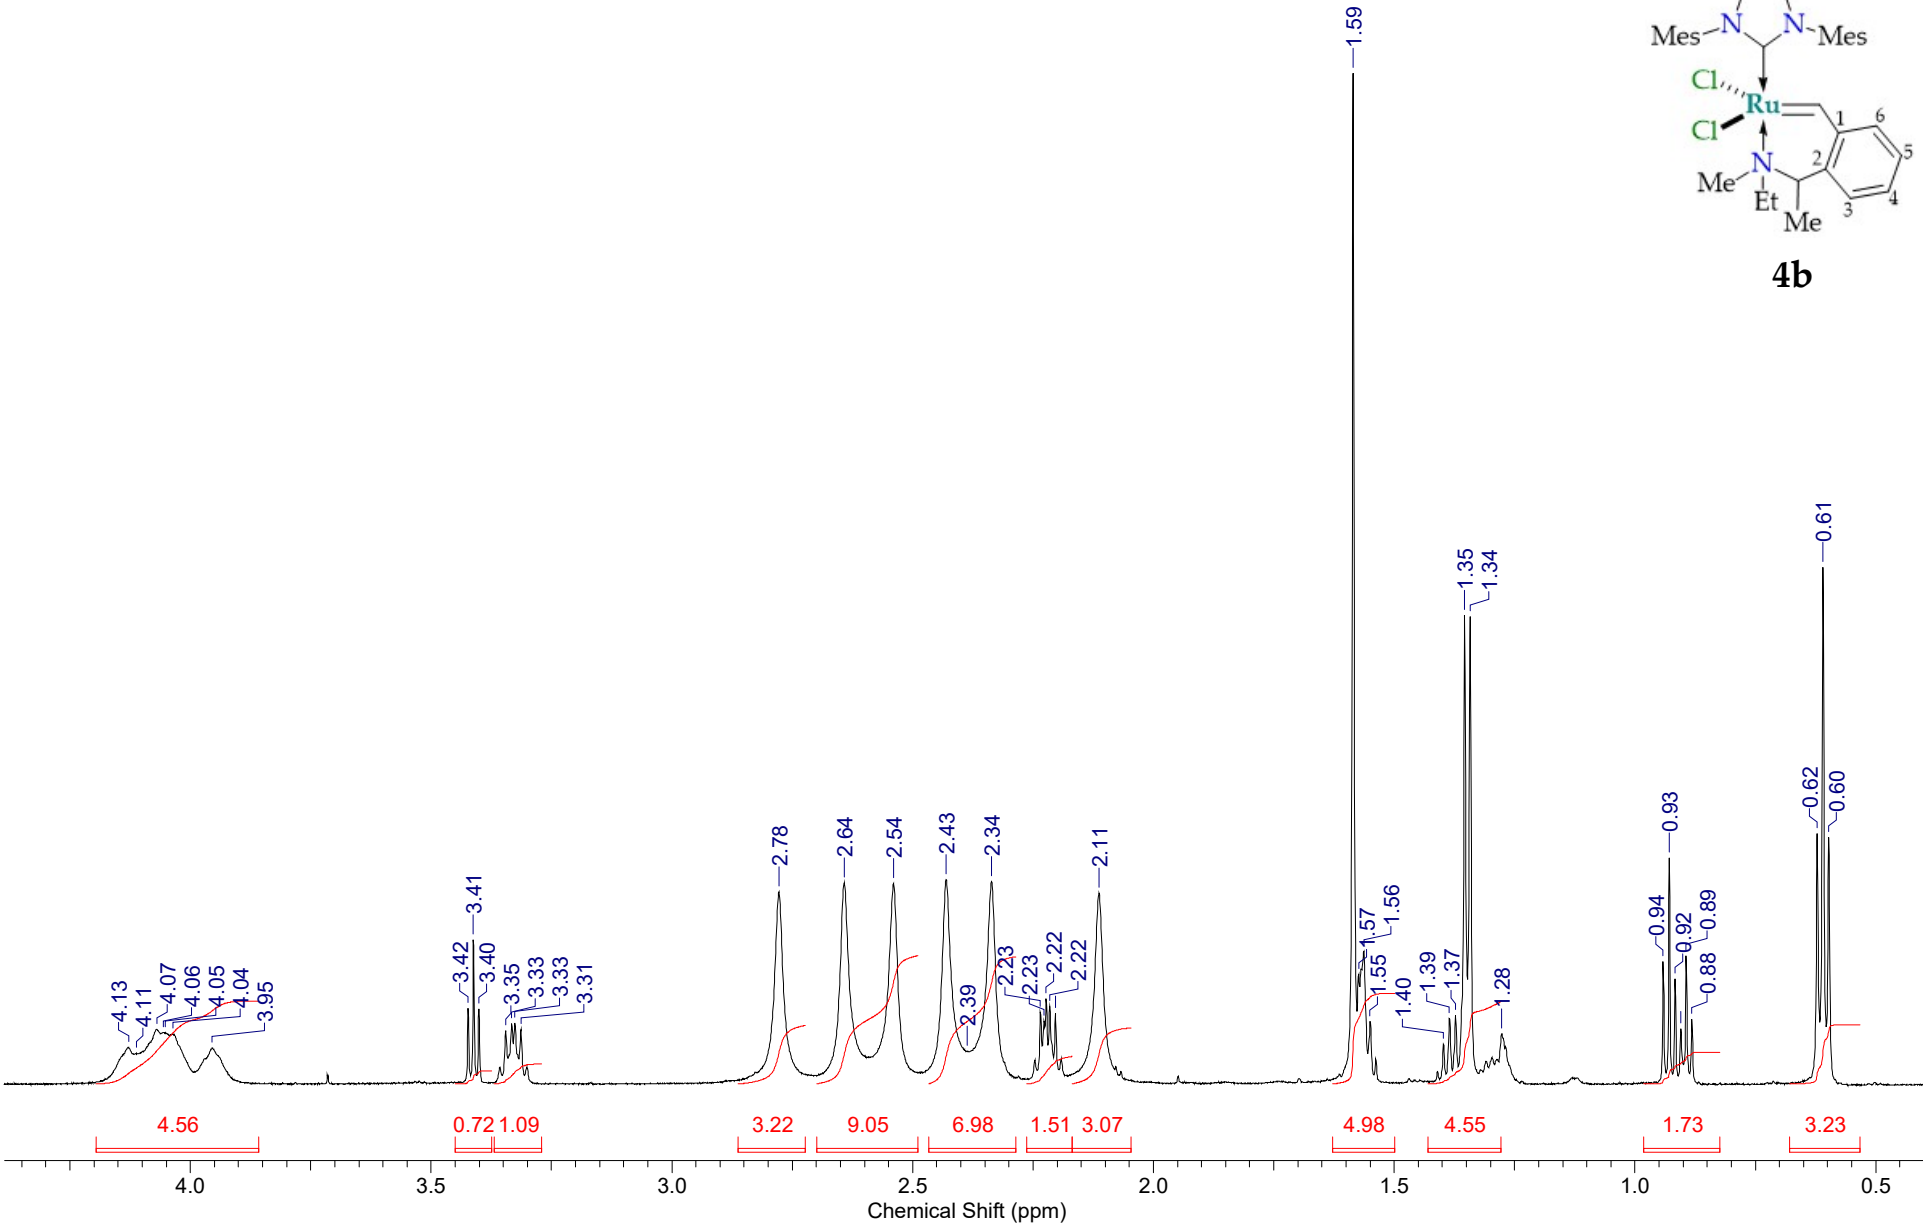



# <sup>1</sup>H spectrum of compound 4b

|                        |                      |                   |                                            |                        |                    |                      |       |
|------------------------|----------------------|-------------------|--------------------------------------------|------------------------|--------------------|----------------------|-------|
| Acquisition Time (sec) | 2.1845               | Comment           | 5 mm CPPBBO BB-1H/19F/D Z-GRD Z125869/0025 |                        | Date               | 07 Mar 2017 11:35:28 |       |
| Date Stamp             | 07 Mar 2017 11:35:28 |                   |                                            |                        |                    |                      |       |
| File Name              |                      |                   |                                            |                        |                    |                      |       |
| Frequency (MHz)        | 500.13               | Nucleus           | 1H                                         | Number of Transients   | 1                  | Origin               | spect |
| Original Points Count  | 32768                | Owner             | nmrsu                                      | Points Count           | 262144             | Pulse Sequence       | zg    |
| Receiver Gain          | 31.21                | SW(cyclical) (Hz) | 15000.00                                   | Solvent                | DICHLOROMETHANE-d2 |                      |       |
| Spectrum Offset (Hz)   | 3088.5078            | Sweep Width (Hz)  | 14999.94                                   | Temperature (degree C) | 25.072             |                      |       |

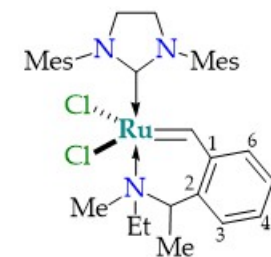

4b

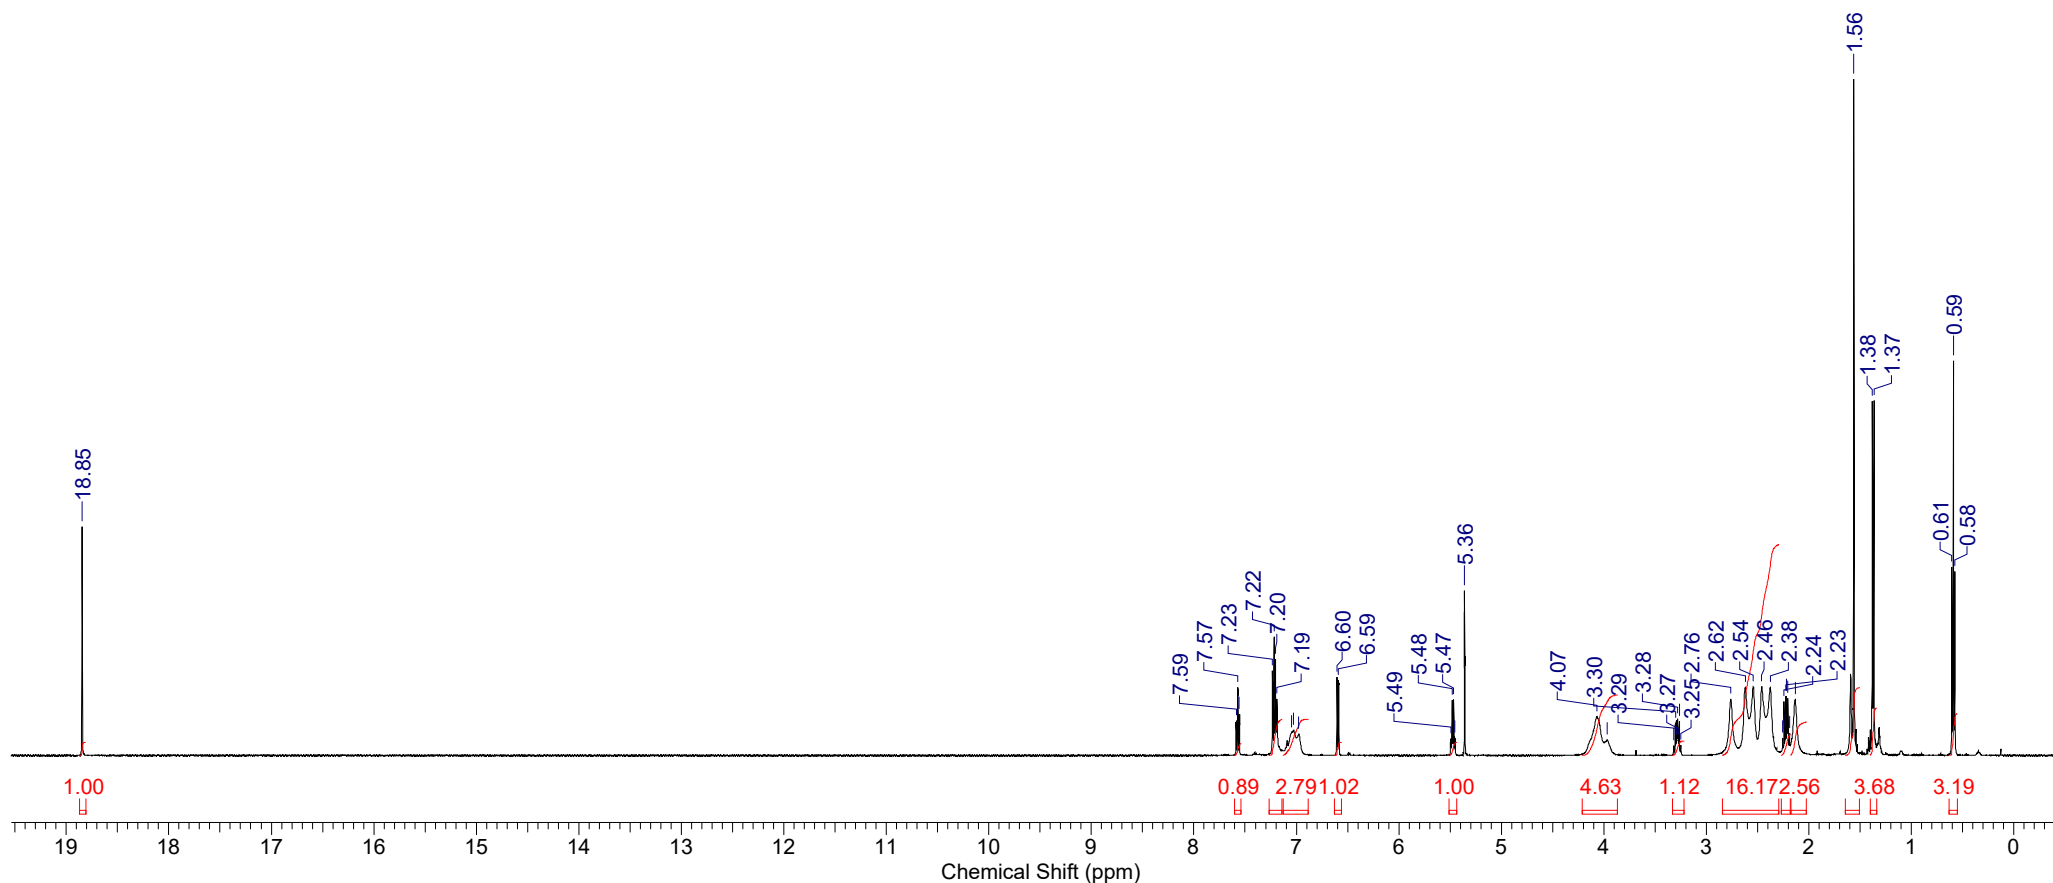

# $^1\text{H}$ spectrum of compound **4b**

|                        |                      |                   |                                            |                        |                    |                      |       |
|------------------------|----------------------|-------------------|--------------------------------------------|------------------------|--------------------|----------------------|-------|
| Acquisition Time (sec) | 2.1845               | Comment           | 5 mm CPPBBO BB-1H/19F/D Z-GRD Z125869/0025 |                        | Date               | 07 Mar 2017 11:35:28 |       |
| Date Stamp             | 07 Mar 2017 11:35:28 |                   |                                            |                        |                    |                      |       |
| File Name              |                      |                   |                                            |                        |                    |                      |       |
| Frequency (MHz)        | 500.13               | Nucleus           | 1H                                         | Number of Transients   | 1                  | Origin               | spect |
| Original Points Count  | 32768                | Owner             | nmrsu                                      | Points Count           | 262144             | Pulse Sequence       | zg    |
| Receiver Gain          | 31.21                | SW(cyclical) (Hz) | 15000.00                                   | Solvent                | DICHLOROMETHANE-d2 |                      |       |
| Spectrum Offset (Hz)   | 3088.5078            | Sweep Width (Hz)  | 14999.94                                   | Temperature (degree C) | 25.072             |                      |       |

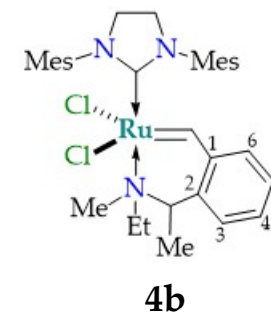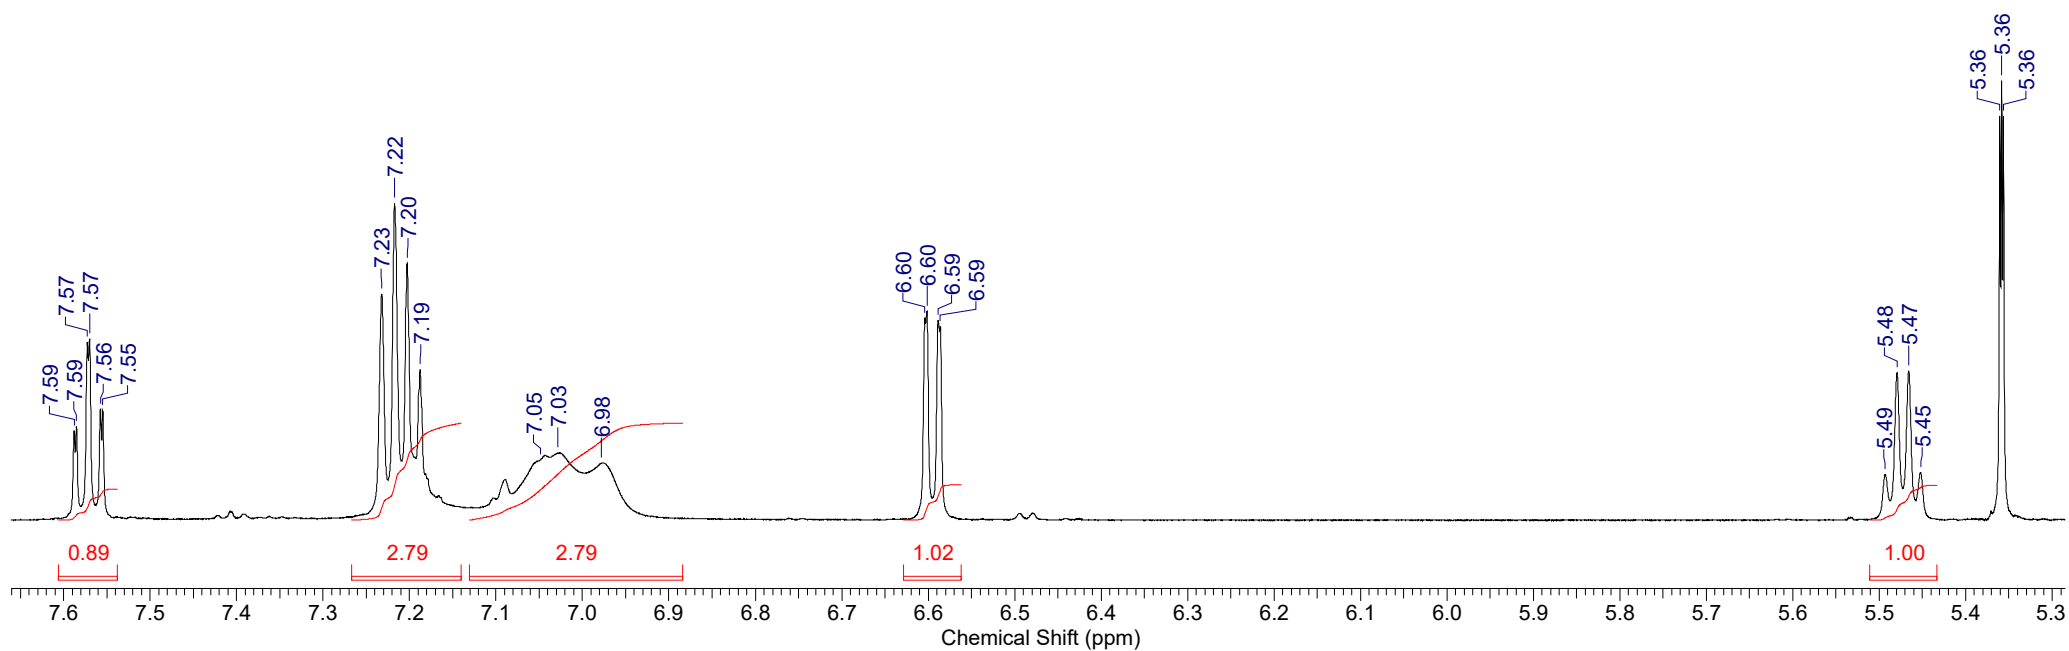

### <sup>1</sup>H spectrum of compound **4b**

|                        |                      |                   |                                            |                        |                    |                      |       |
|------------------------|----------------------|-------------------|--------------------------------------------|------------------------|--------------------|----------------------|-------|
| Acquisition Time (sec) | 2.1845               | Comment           | 5 mm CPPBBO BB-1H/19F/D Z-GRD Z125869/0025 |                        | Date               | 07 Mar 2017 11:35:28 |       |
| Date Stamp             | 07 Mar 2017 11:35:28 |                   |                                            |                        |                    |                      |       |
| File Name              |                      |                   |                                            |                        |                    |                      |       |
| Frequency (MHz)        | 500.13               | Nucleus           | 1H                                         | Number of Transients   | 1                  | Origin               | spect |
| Original Points Count  | 32768                | Owner             | nmrsu                                      | Points Count           | 262144             | Pulse Sequence       | zg    |
| Receiver Gain          | 31.21                | SW(cyclical) (Hz) | 15000.00                                   | Solvent                | DICHLOROMETHANE-d2 |                      |       |
| Spectrum Offset (Hz)   | 3088.5078            | Sweep Width (Hz)  | 14999.94                                   | Temperature (degree C) | 25.072             |                      |       |

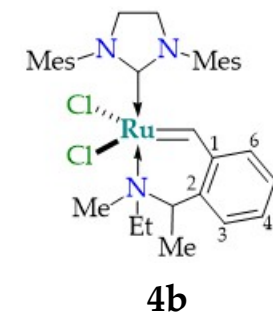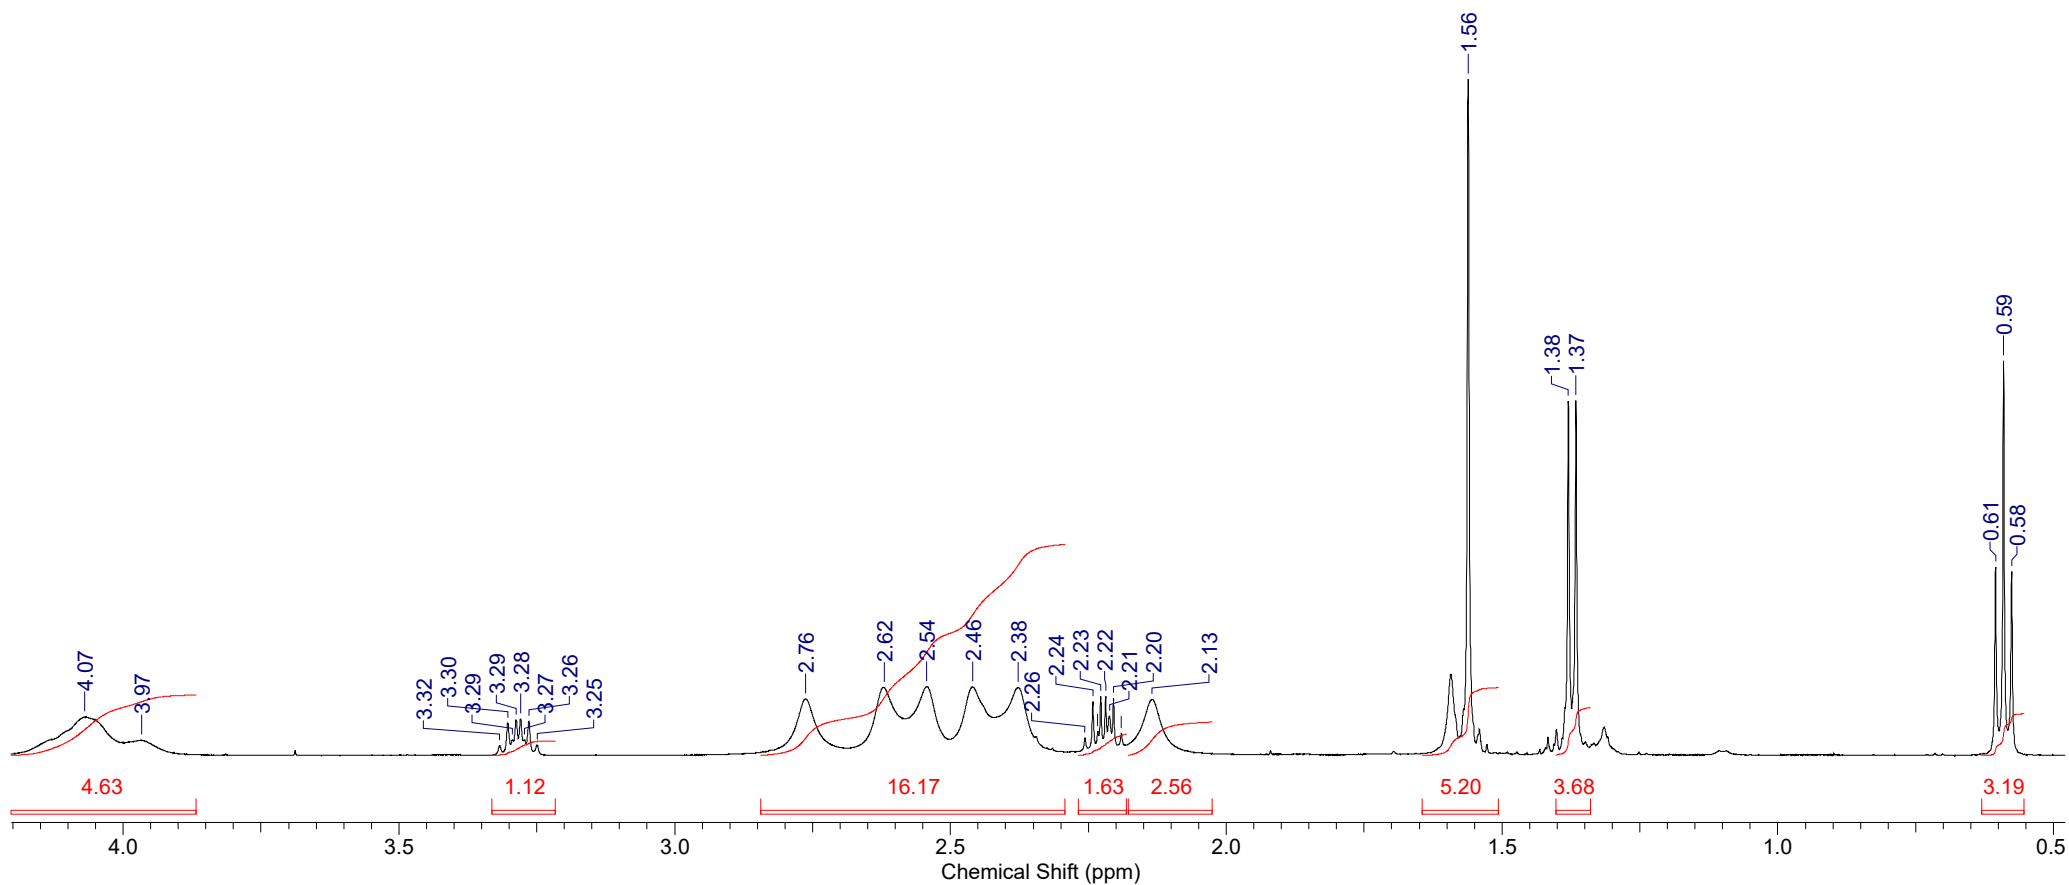

# $^{13}\text{C}$ spectrum of compound **4b**

|                                 |  |                                          |           |                                 |  |
|---------------------------------|--|------------------------------------------|-----------|---------------------------------|--|
| Acquisition Time (sec) 1.7197   |  | Comment single pulse decoupled gated NOE |           | Date 19 Jan 2023 06:46:31       |  |
| Date Stamp 19 Jan 2023 05:44:01 |  |                                          | File Name |                                 |  |
| Frequency (MHz) 150.91          |  | Nucleus 13C                              |           | Number of Transients 4000       |  |
| Original Points Count 131072    |  | Owner CKP                                |           | Points Count 131072             |  |
| Receiver Gain 56.00             |  | Solvent CHLOROFORM-d                     |           | Pulse Sequence single pulse dec |  |
| Sweep Width (Hz) 76219.52       |  |                                          |           | Spectrum Offset (Hz) 25629.8613 |  |

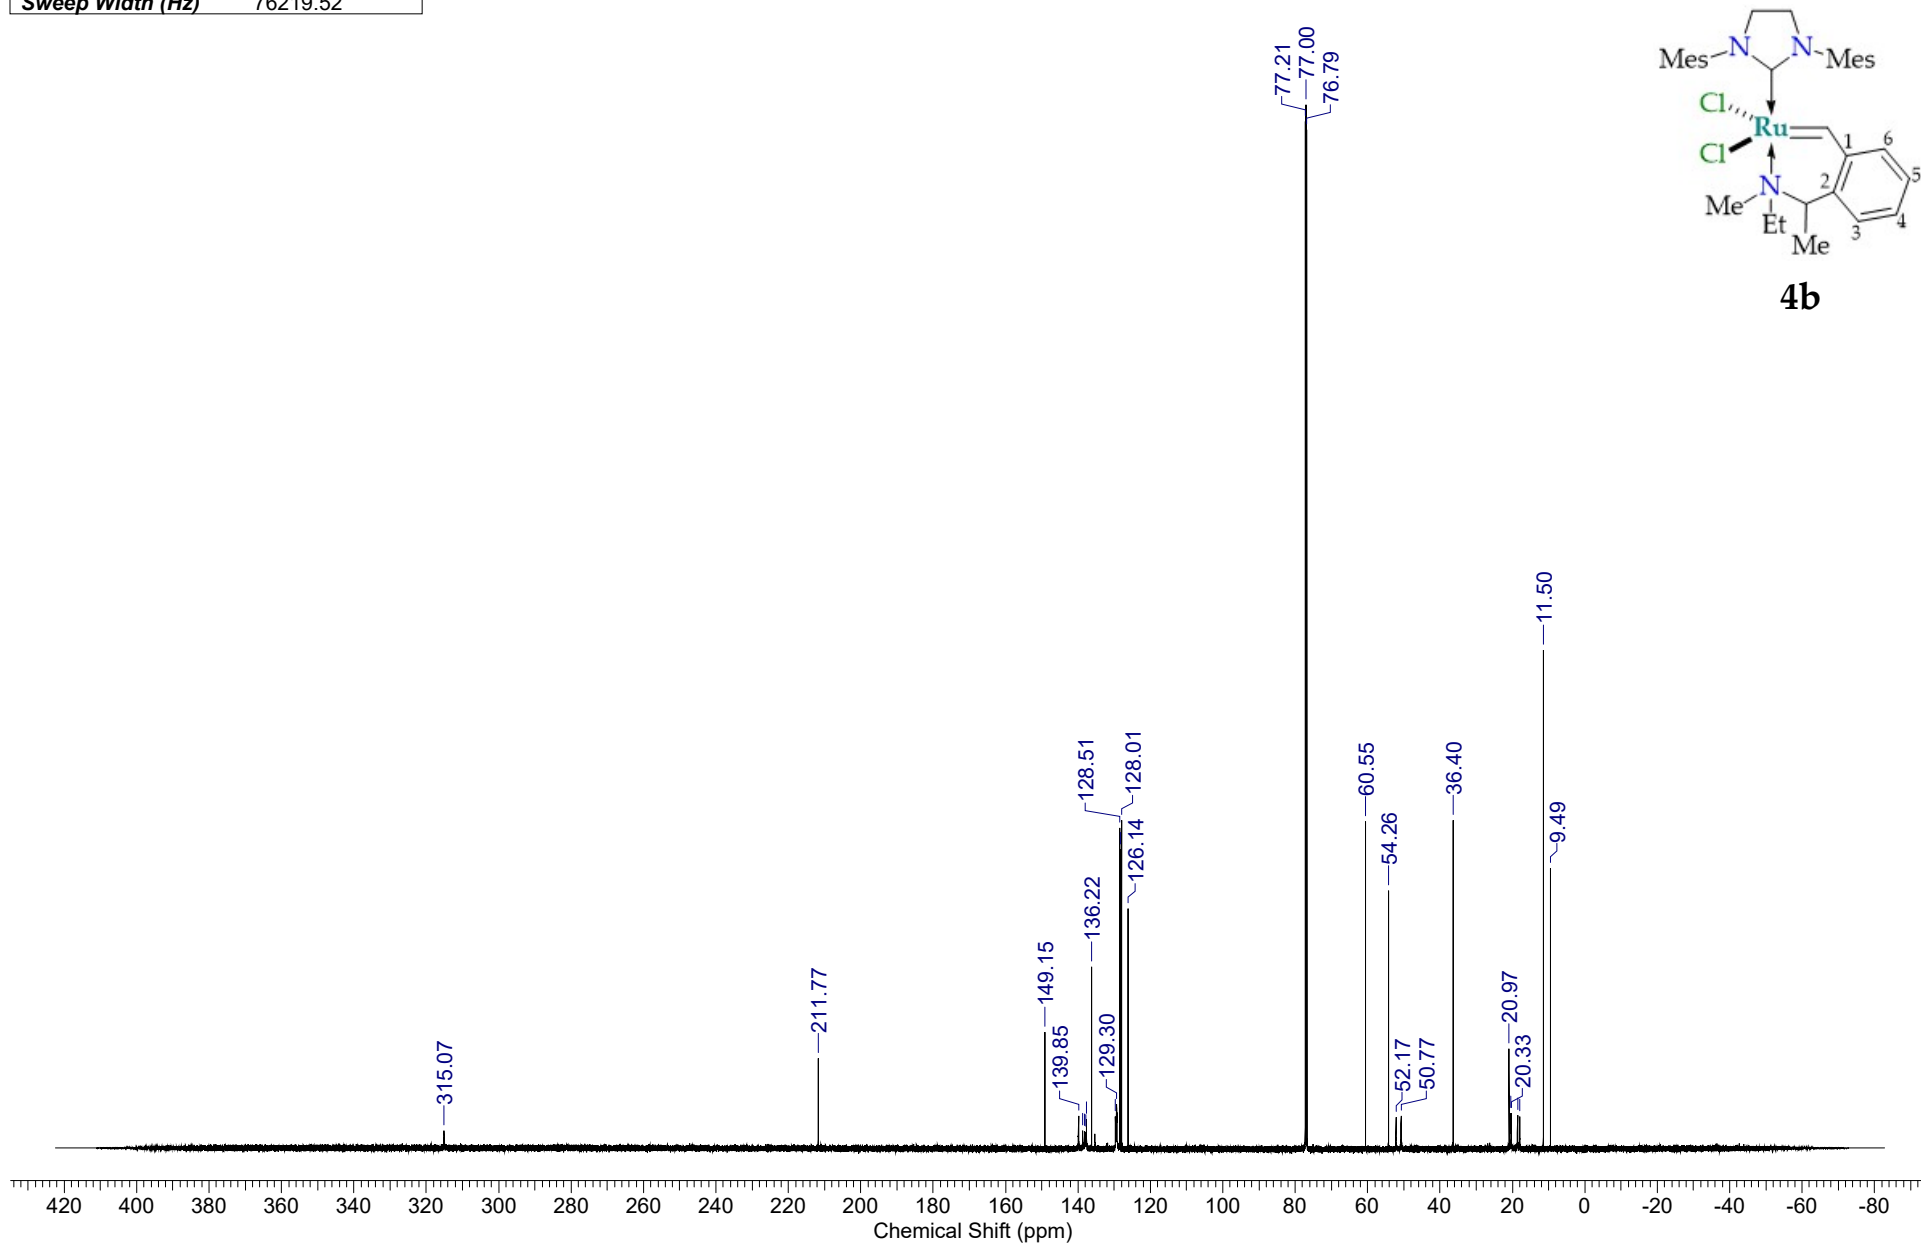

### $^{13}\text{C}$ spectrum of compound **4b**

|                                                         |                      |
|---------------------------------------------------------|----------------------|
| <b>Formula</b> C <sub>15</sub> H <sub>22</sub> Cl N Ru? | <b>FW</b> 416.3313+? |
|---------------------------------------------------------|----------------------|

|                               |                      |                  |                                               |                             |                             |                       |                  |
|-------------------------------|----------------------|------------------|-----------------------------------------------|-----------------------------|-----------------------------|-----------------------|------------------|
| <b>Acquisition Time (sec)</b> | 0.6921               | <b>Comment</b>   | single pulse decoupled gated NOE              |                             | <b>Date</b>                 | 12 Jan 2023 09:51:21  |                  |
| <b>Date Stamp</b>             | 12 Jan 2023 08:48:40 | <b>File Name</b> | C:\USERS\ALEXA\DESKTOP\4B 13CFZ1444-2 (2).JDF |                             |                             |                       |                  |
| <b>Frequency (MHz)</b>        | 150.91               | <b>Nucleus</b>   | 13C                                           | <b>Number of Transients</b> | 3401                        | <b>Origin</b>         | ECA 600          |
| <b>Original Points Count</b>  | 32768                | <b>Owner</b>     | CKP                                           | <b>Points Count</b>         | 32768                       | <b>Pulse Sequence</b> | single pulse dec |
| <b>Receiver Gain</b>          | 56.00                | <b>Solvent</b>   | CHLOROFORM-d                                  |                             | <b>Spectrum Offset (Hz)</b> | 15065.9502            |                  |
| <b>Sweep Width (Hz)</b>       | 47348.49             |                  |                                               |                             |                             |                       |                  |

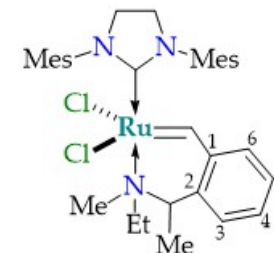

**4b**

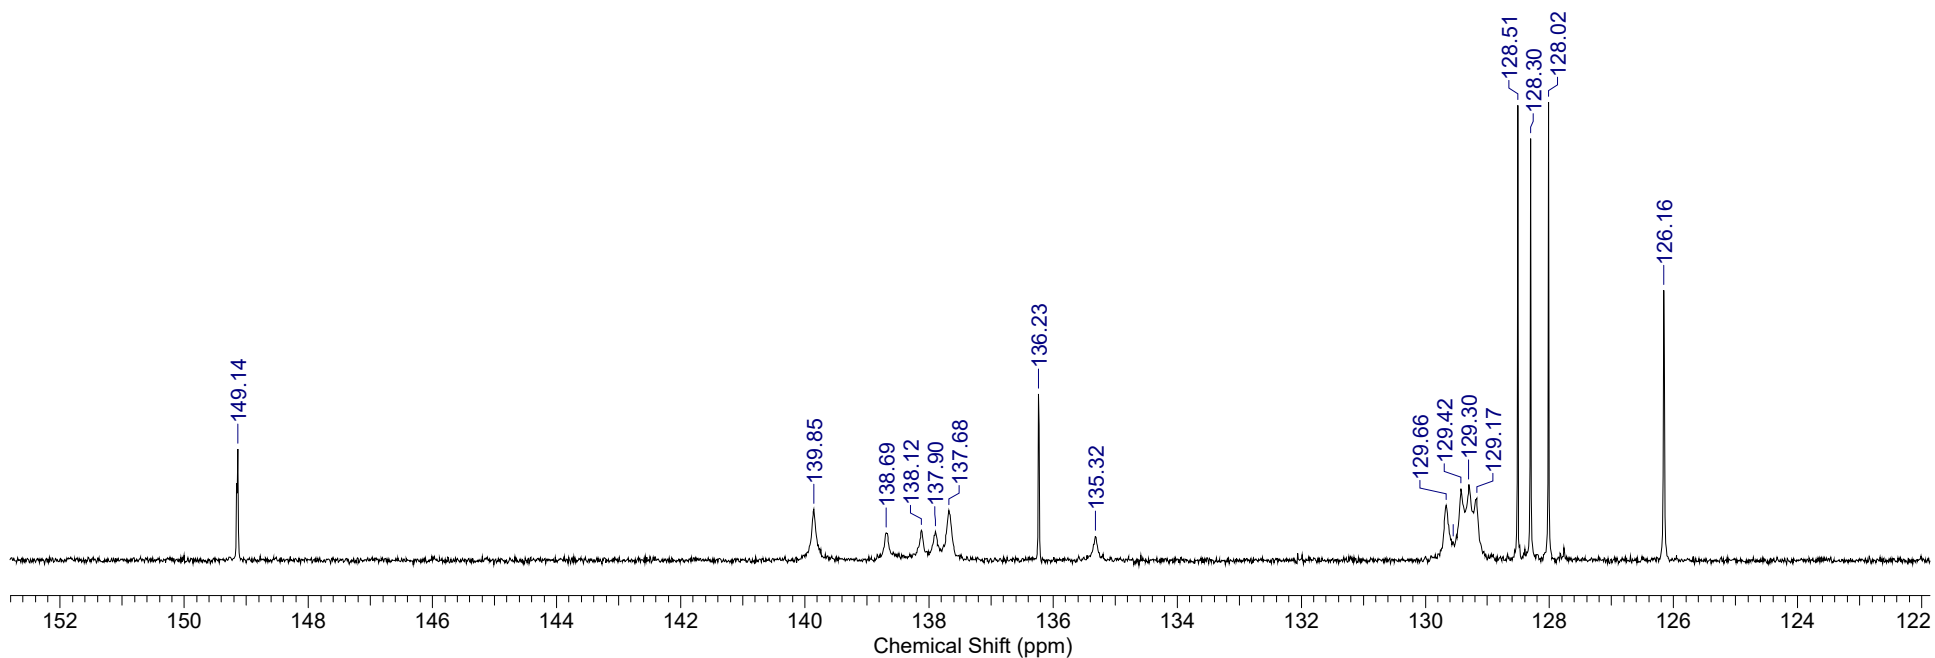

# $^{13}\text{C}$ spectrum of compound **4b**

|                                                                           |                      |
|---------------------------------------------------------------------------|----------------------|
| <b>Formula</b> $\text{C}_{15}\text{H}_{22}\text{Cl}_2\text{N}_3\text{Ru}$ | <b>FW</b> 416.3313+? |
|---------------------------------------------------------------------------|----------------------|

|                                        |                                                                |                                        |
|----------------------------------------|----------------------------------------------------------------|----------------------------------------|
| <b>Acquisition Time (sec)</b> 0.6921   | <b>Comment</b> single pulse decoupled gated NOE                | <b>Date</b> 12 Jan 2023 09:51:21       |
| <b>Date Stamp</b> 12 Jan 2023 08:48:40 | <b>File Name</b> C:\USERS\ALEXA\DESKTOP\4B 13CFZ1444-2 (2).JDF |                                        |
| <b>Frequency (MHz)</b> 150.91          | <b>Nucleus</b> $^{13}\text{C}$                                 | <b>Number of Transients</b> 3401       |
| <b>Original Points Count</b> 32768     | <b>Owner</b> CKP                                               | <b>Points Count</b> 32768              |
| <b>Receiver Gain</b> 56.00             | <b>Solvent</b> CHLOROFORM-d                                    | <b>Pulse Sequence</b> single pulse dec |
| <b>Sweep Width (Hz)</b> 47348.49       |                                                                | <b>Spectrum Offset (Hz)</b> 15065.9502 |

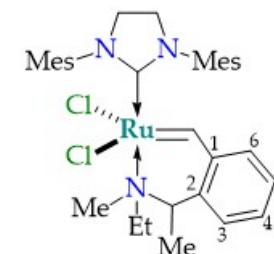

**4b**

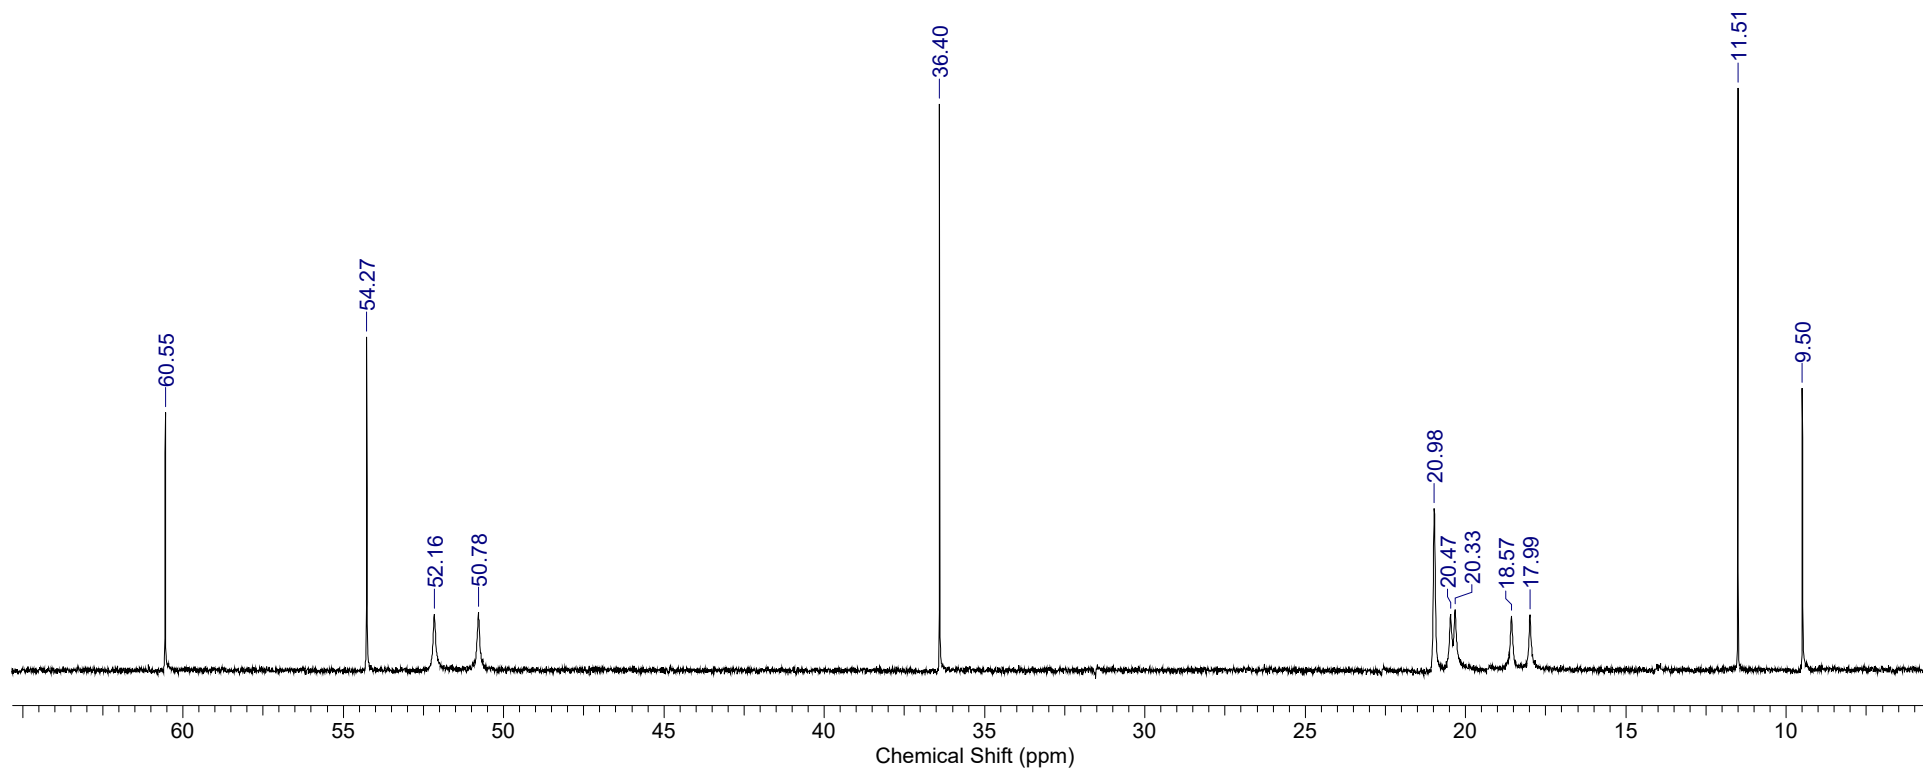

# DEPT-135 spectrum of compound 4b

|                        |                      |                   |                                            |                        |                    |                      |       |
|------------------------|----------------------|-------------------|--------------------------------------------|------------------------|--------------------|----------------------|-------|
| Acquisition Time (sec) | 0.8039               | Comment           | 5 mm CPPBBO BB-1H/19F/D Z-GRD Z125869/0025 |                        | Date               | 07 Mar 2017 12:18:08 |       |
| Date Stamp             | 07 Mar 2017 12:18:08 |                   |                                            |                        |                    |                      |       |
| File Name              |                      |                   |                                            |                        |                    |                      |       |
| Frequency (MHz)        | 125.76               | Nucleus           | 13C                                        | Number of Transients   | 571                | Origin               | spect |
| Original Points Count  | 32768                | Owner             | nmrsu                                      | Points Count           | 32768              | Pulse Sequence       | jmod  |
| Receiver Gain          | 189.77               | SW(cyclical) (Hz) | 40760.87                                   | Solvent                | DICHLOROMETHANE-d2 |                      |       |
| Spectrum Offset (Hz)   | 20121.2441           | Sweep Width (Hz)  | 40759.63                                   | Temperature (degree C) | 25.087             |                      |       |

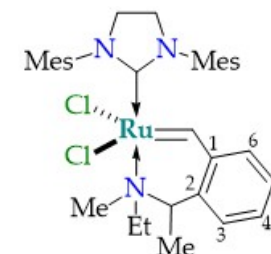

4b

8 kp0703-2017-K7 (Me-NMeEt)\_014001r.esp

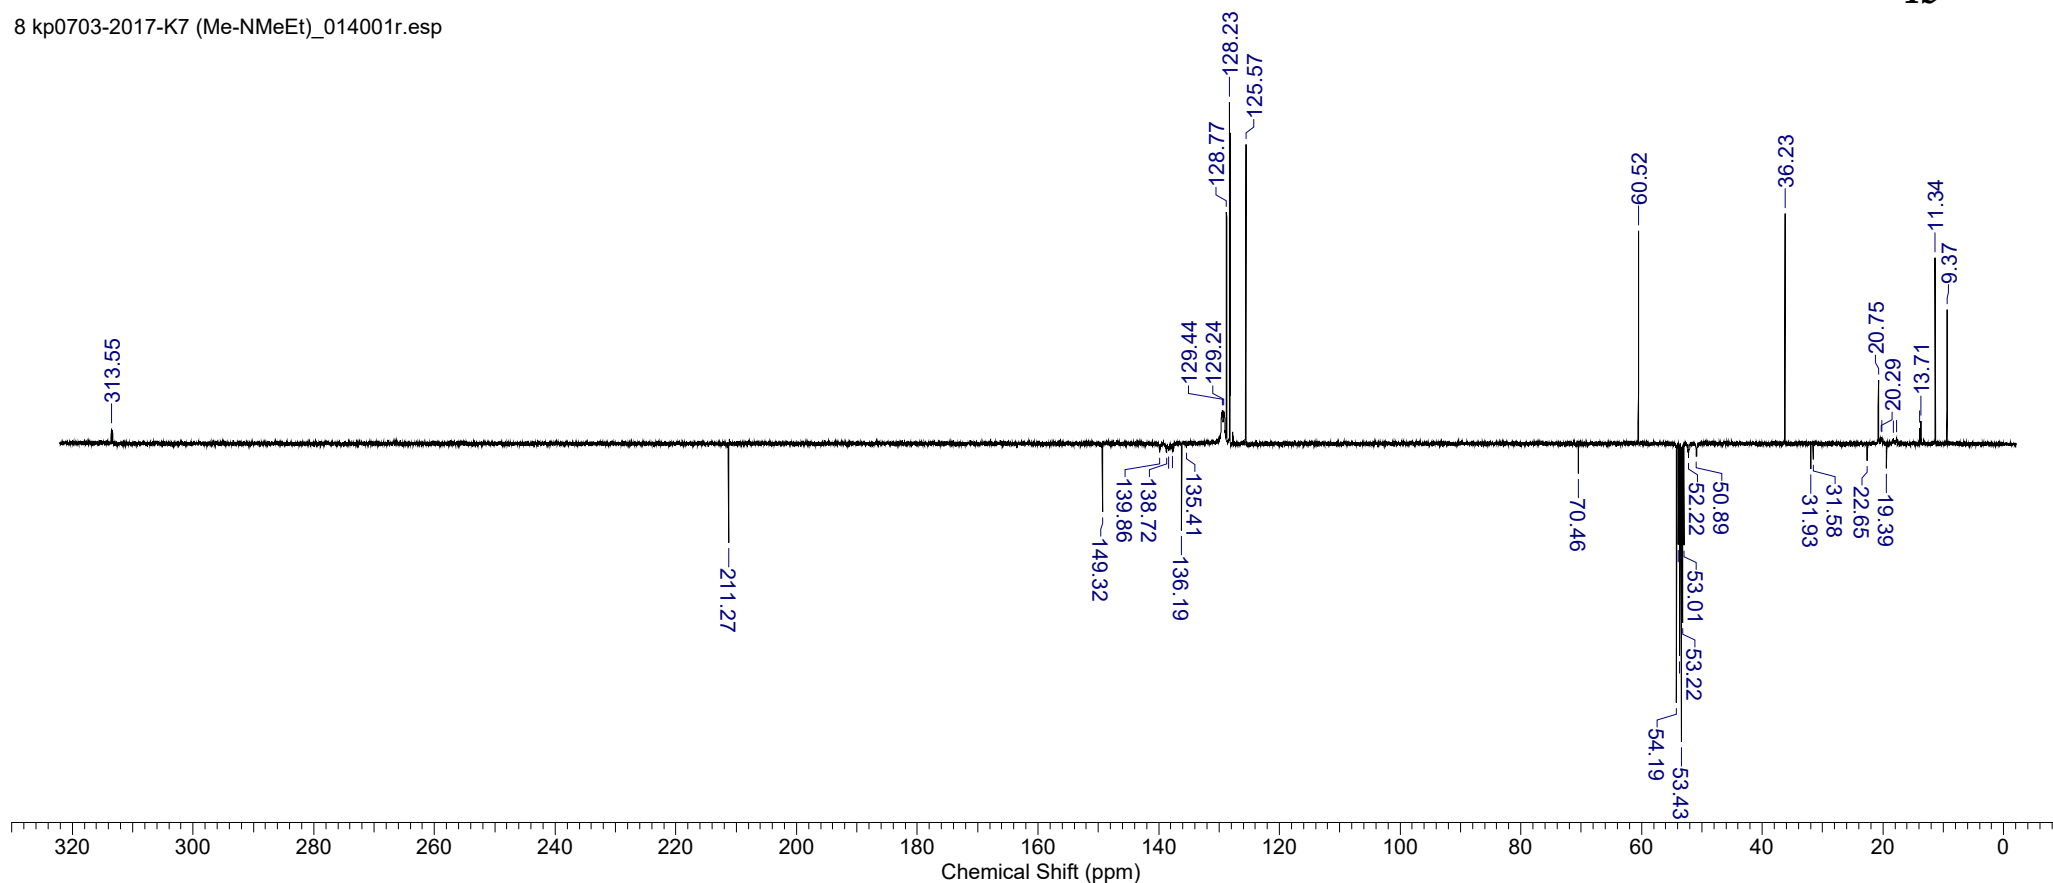

# DEPT-135 spectrum of compound **4b**

|                        |                      |                   |                                            |                        |                    |                      |       |
|------------------------|----------------------|-------------------|--------------------------------------------|------------------------|--------------------|----------------------|-------|
| Acquisition Time (sec) | 0.8039               | Comment           | 5 mm CPPBBO BB-1H/19F/D Z-GRD Z125869/0025 |                        | Date               | 07 Mar 2017 12:18:08 |       |
| Date Stamp             | 07 Mar 2017 12:18:08 |                   |                                            |                        |                    |                      |       |
| File Name              |                      |                   |                                            |                        |                    |                      |       |
| Frequency (MHz)        | 125.76               | Nucleus           | 13C                                        | Number of Transients   | 571                | Origin               | spect |
| Original Points Count  | 32768                | Owner             | nrmrsu                                     | Points Count           | 32768              | Pulse Sequence       | jmod  |
| Receiver Gain          | 189.77               | SW(cyclical) (Hz) | 40760.87                                   | Solvent                | DICHLOROMETHANE-d2 |                      |       |
| Spectrum Offset (Hz)   | 20121.2441           | Sweep Width (Hz)  | 40759.63                                   | Temperature (degree C) | 25.087             |                      |       |

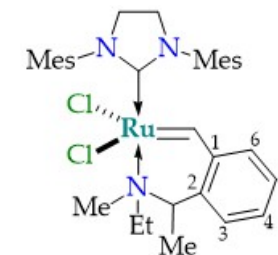

**4b**

8 kp0703-2017-K7 (Me-NMeEt)\_014001r.esp

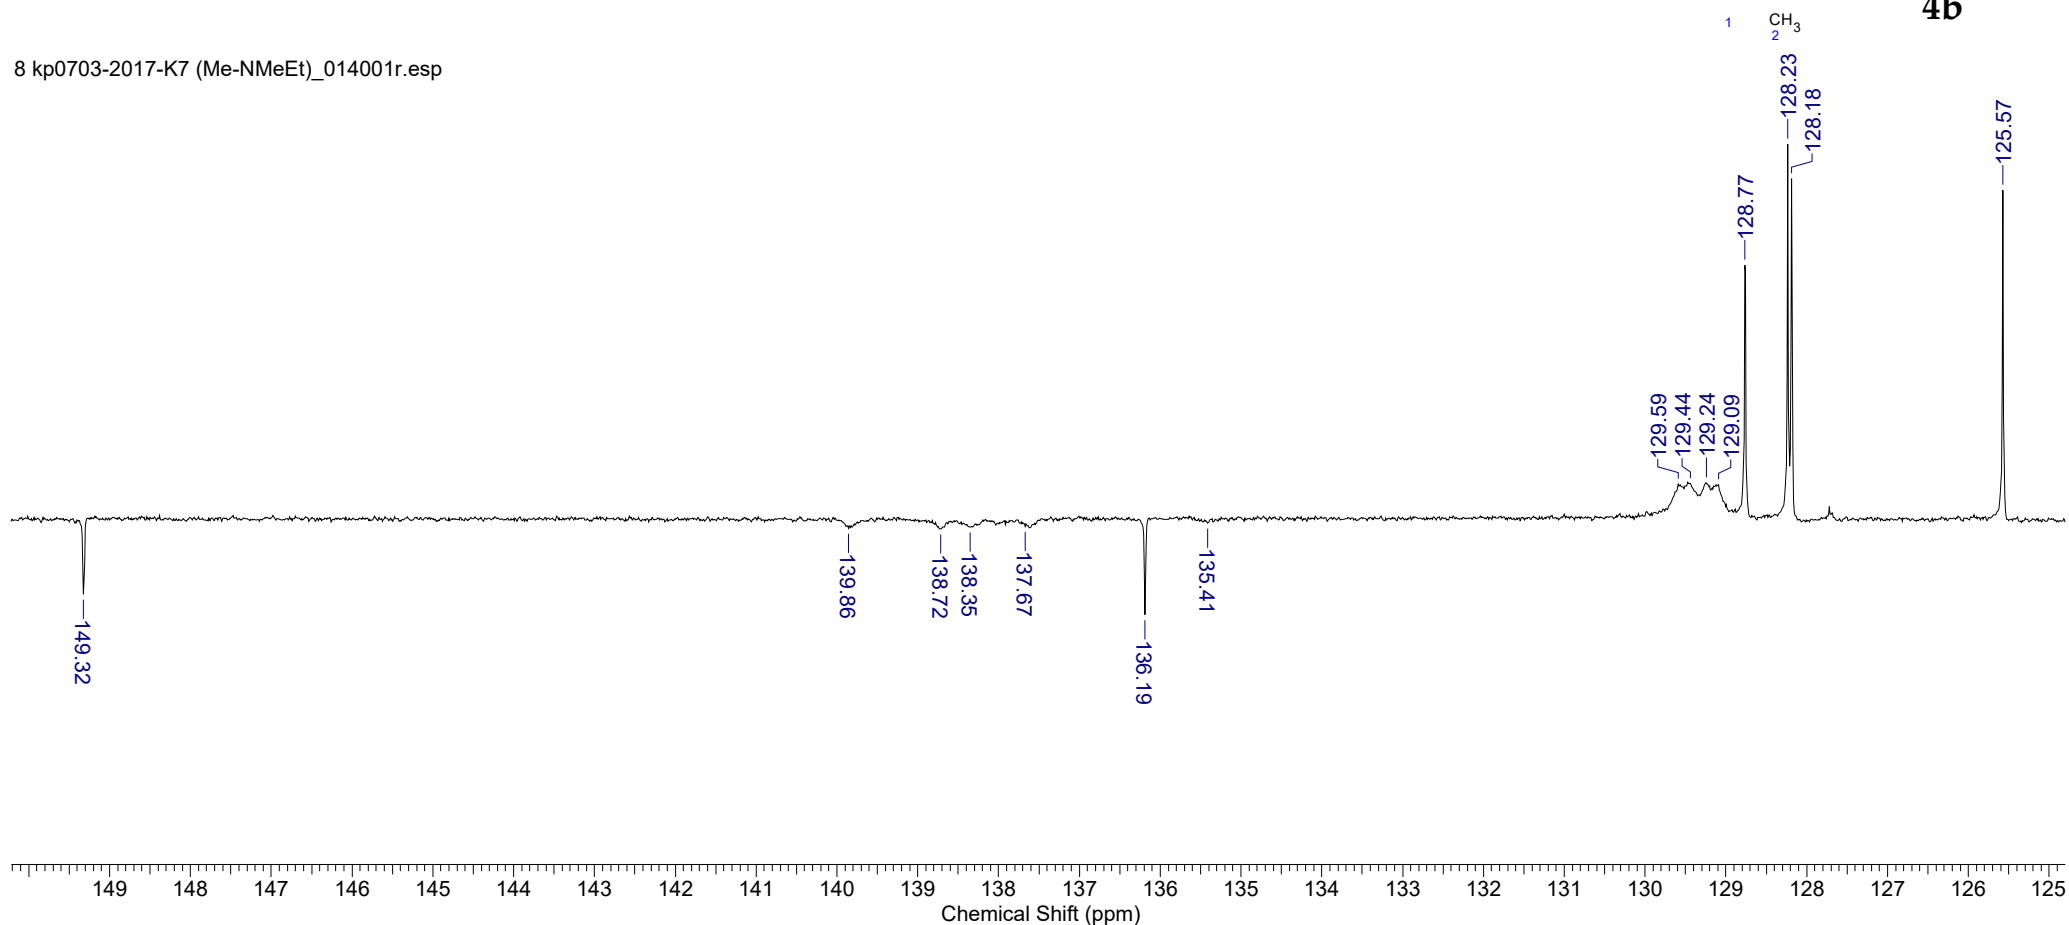



# DEPT-135 spectrum of compound **4b**

|                        |                      |                   |                                            |                        |                    |                      |       |
|------------------------|----------------------|-------------------|--------------------------------------------|------------------------|--------------------|----------------------|-------|
| Acquisition Time (sec) | 0.8039               | Comment           | 5 mm CPPBBO BB-1H/19F/D Z-GRD Z125869/0025 |                        | Date               | 07 Mar 2017 12:18:08 |       |
| Date Stamp             | 07 Mar 2017 12:18:08 |                   |                                            |                        |                    |                      |       |
| File Name              |                      |                   |                                            |                        |                    |                      |       |
| Frequency (MHz)        | 125.76               | Nucleus           | 13C                                        | Number of Transients   | 571                | Origin               | spect |
| Original Points Count  | 32768                | Owner             | nmrsu                                      | Points Count           | 32768              | Pulse Sequence       | jmod  |
| Receiver Gain          | 189.77               | SW(cyclical) (Hz) | 40760.87                                   | Solvent                | DICHLOROMETHANE-d2 |                      |       |
| Spectrum Offset (Hz)   | 20121.2441           | Sweep Width (Hz)  | 40759.63                                   | Temperature (degree C) | 25.087             |                      |       |

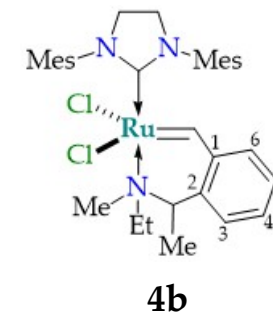

8 kp0703-2017-K7 (Me-NMeEt)\_014001r.esp

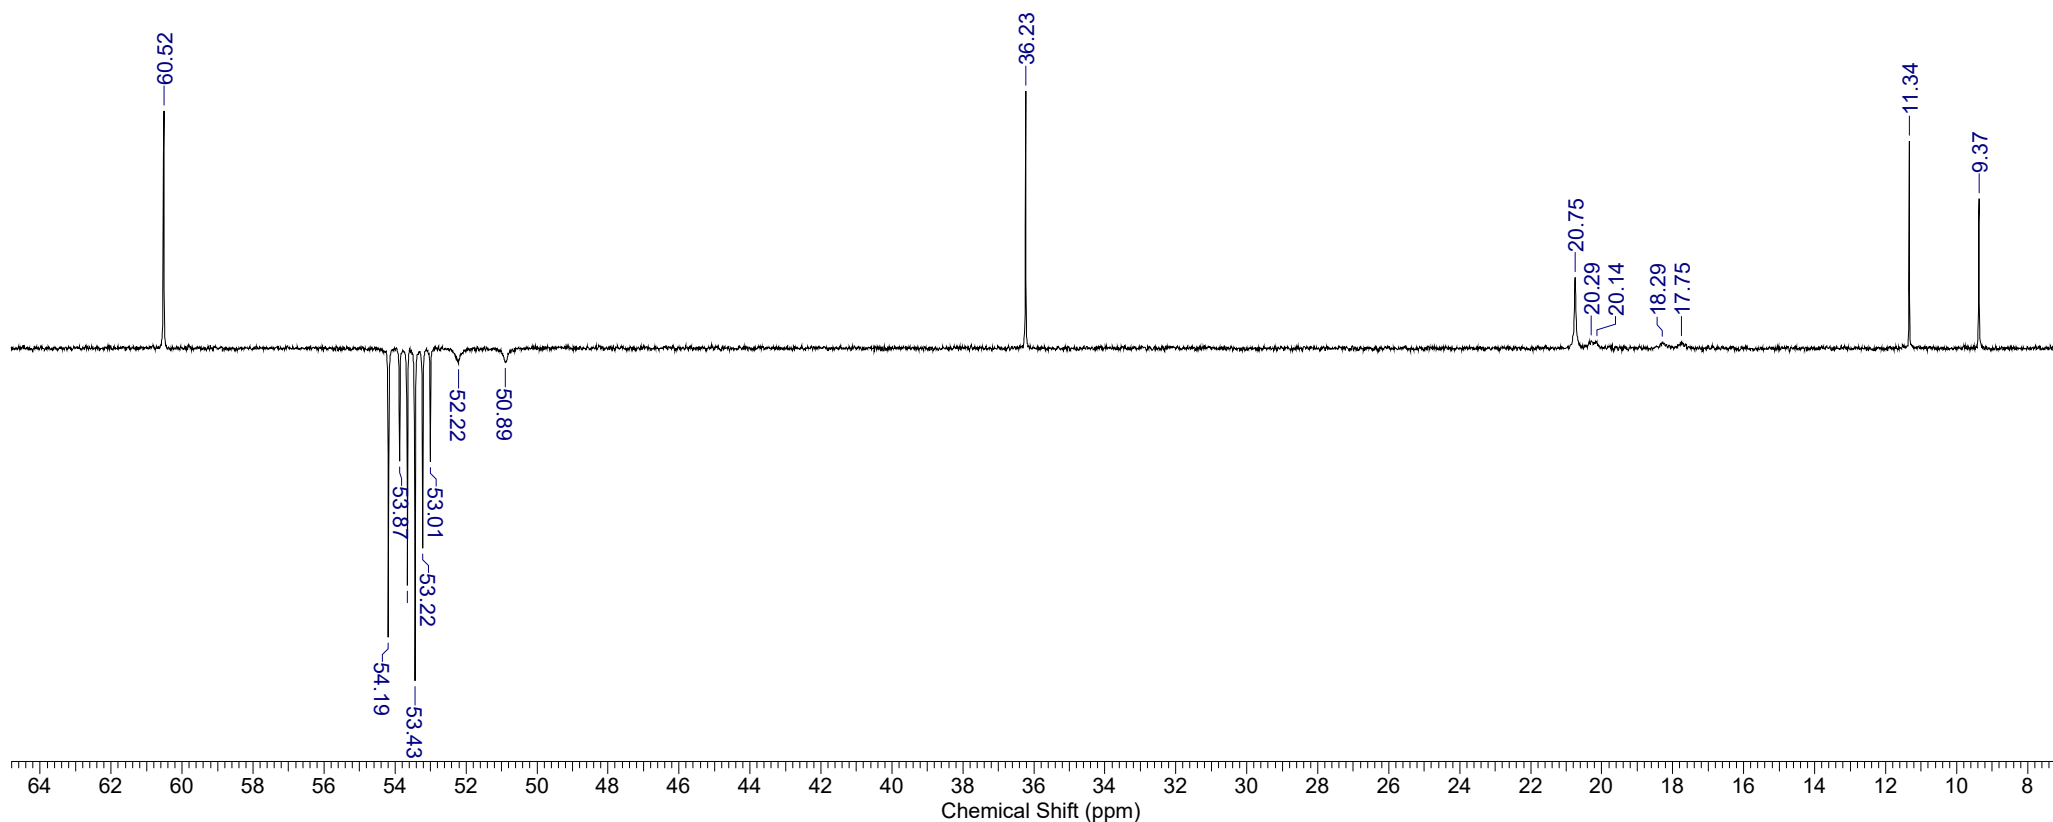

# IR spectrum of compound 4b

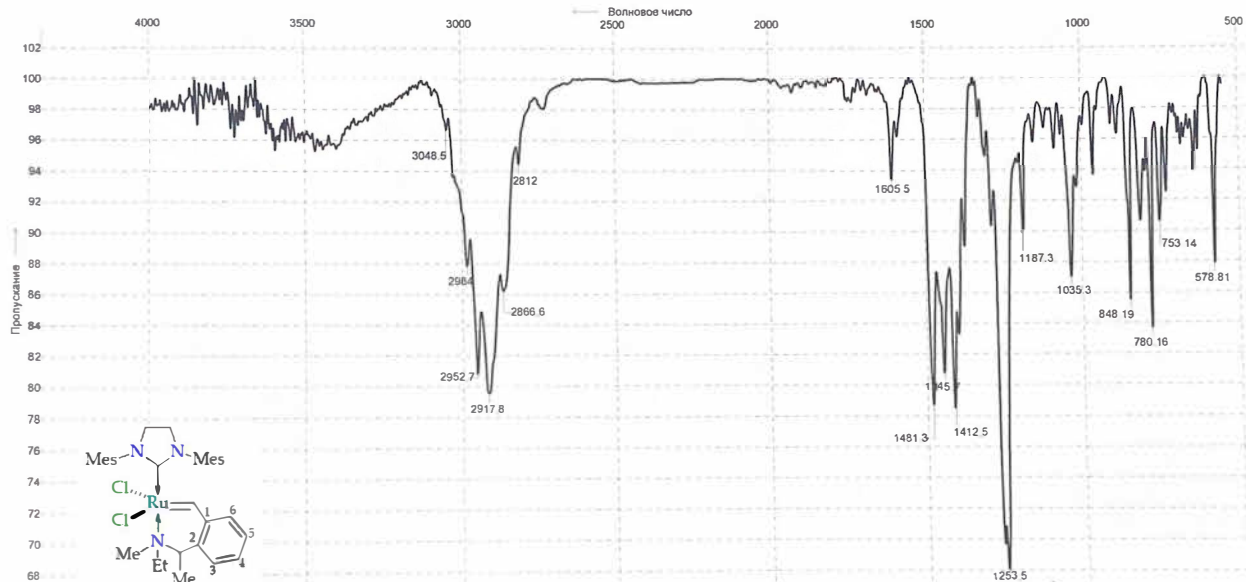

# $^1\text{H}$ spectrum of compound **4c**

|                        |                      |           |              |                      |                      |
|------------------------|----------------------|-----------|--------------|----------------------|----------------------|
| Acquisition Time (sec) | 1.9818               | Comment   | single pulse | Date                 | 14 Sep 2022 15:40:30 |
| Date Stamp             | 14 Sep 2022 15:25:37 | File Name |              |                      |                      |
| Frequency (MHz)        | 600.17               | Nucleus   | $^1\text{H}$ | Number of Transients | 8                    |
| Original Points Count  | 32768                | Owner     | CKP          | Points Count         | 32768                |
| Receiver Gain          | 42.00                | Solvent   | CHLOROFORM-d | Pulse Sequence       | single_pulse.ex2     |
| Sweep Width (Hz)       | 16534.39             |           |              | Spectrum Offset (Hz) | 5413.5879            |

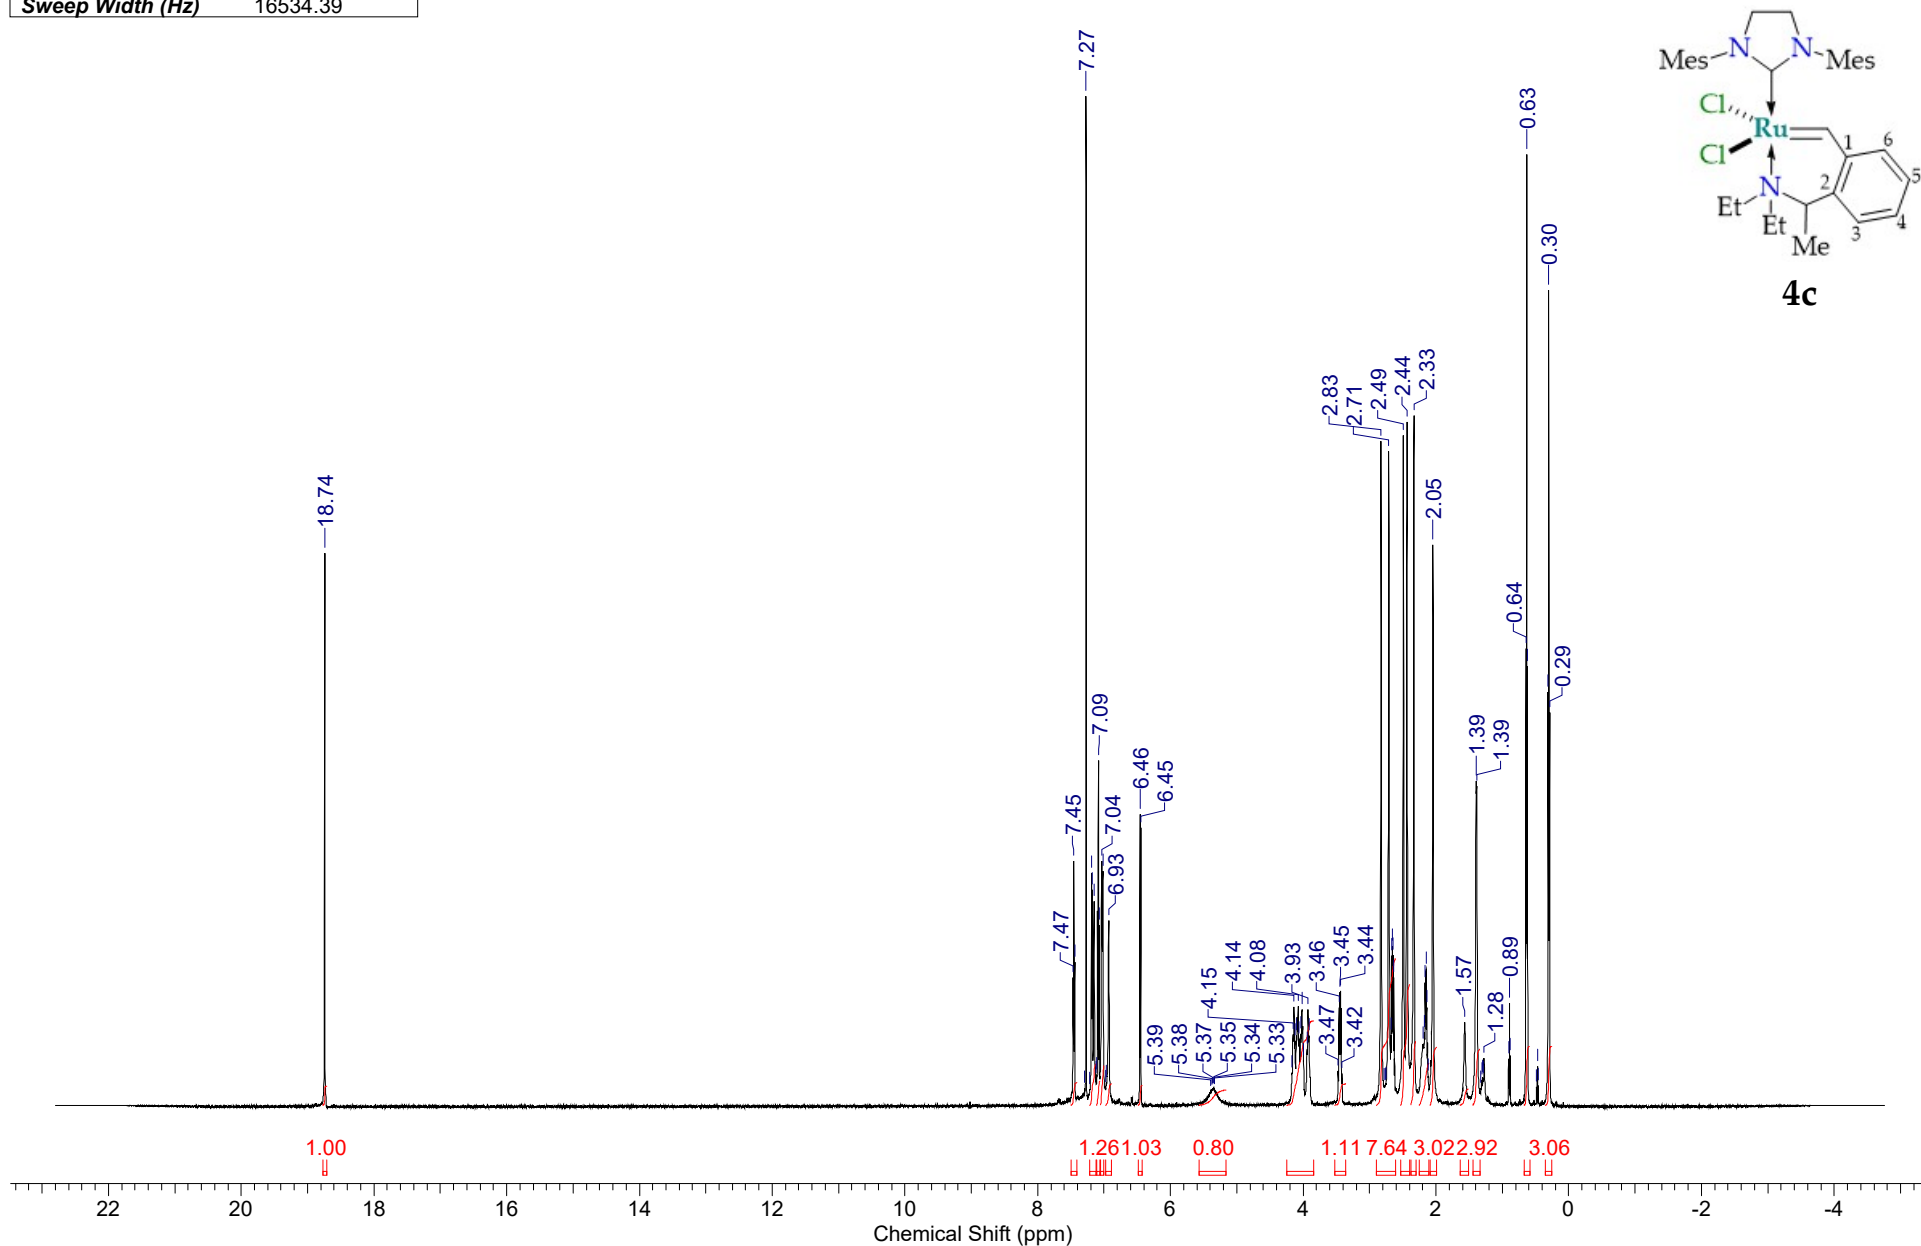

# $^1\text{H}$ spectrum of compound **4c**

|                        |                      |           |              |                      |                      |
|------------------------|----------------------|-----------|--------------|----------------------|----------------------|
| Acquisition Time (sec) | 1.9818               | Comment   | single pulse | Date                 | 14 Sep 2022 15:40:30 |
| Date Stamp             | 14 Sep 2022 15:25:37 | File Name |              |                      |                      |
| Frequency (MHz)        | 600.17               | Nucleus   | $^1\text{H}$ | Number of Transients | 8                    |
| Original Points Count  | 32768                | Owner     | CKP          | Points Count         | 32768                |
| Receiver Gain          | 42.00                | Solvent   | CHLOROFORM-d | Pulse Sequence       | single_pulse.ex2     |
| Sweep Width (Hz)       | 16534.39             |           |              | Spectrum Offset (Hz) | 5413.5879            |

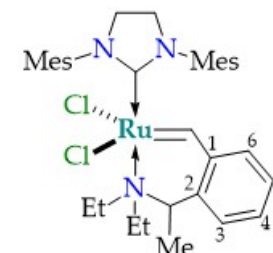

**4c**

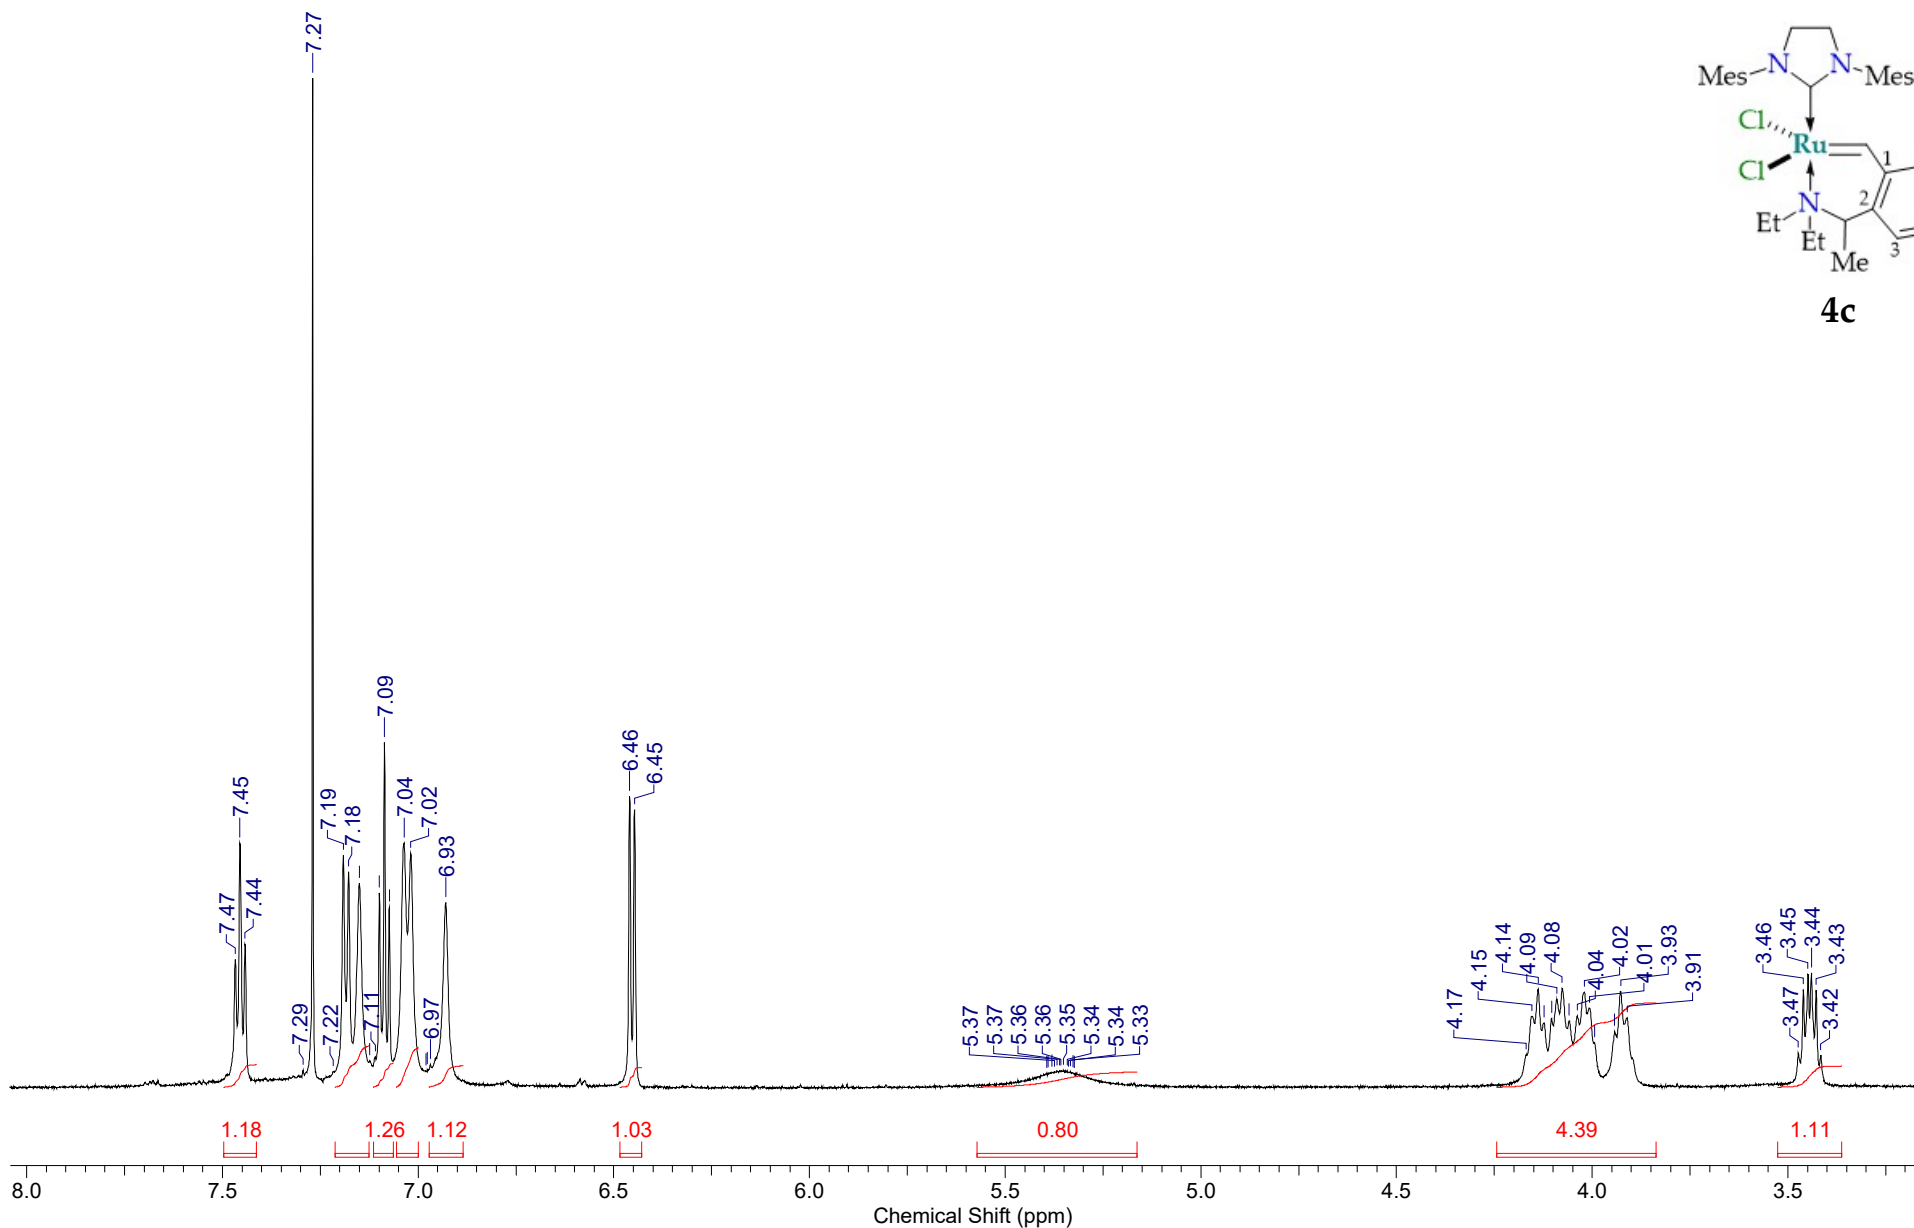

# <sup>1</sup>H spectrum of compound 4c

|                        |                      |           |              |                      |                      |
|------------------------|----------------------|-----------|--------------|----------------------|----------------------|
| Acquisition Time (sec) | 1.9818               | Comment   | single pulse | Date                 | 14 Sep 2022 15:40:30 |
| Date Stamp             | 14 Sep 2022 15:25:37 | File Name |              |                      |                      |
| Frequency (MHz)        | 600.17               | Nucleus   | 1H           | Number of Transients | 8                    |
| Original Points Count  | 32768                | Owner     | CKP          | Points Count         | 32768                |
| Receiver Gain          | 42.00                | Solvent   | CHLOROFORM-d | Pulse Sequence       | single_pulse.ex2     |
| Sweep Width (Hz)       | 16534.39             |           |              | Spectrum Offset (Hz) | 5413.5879            |

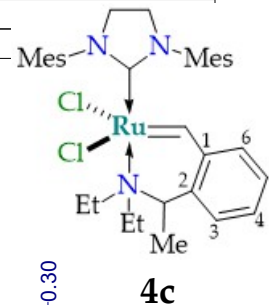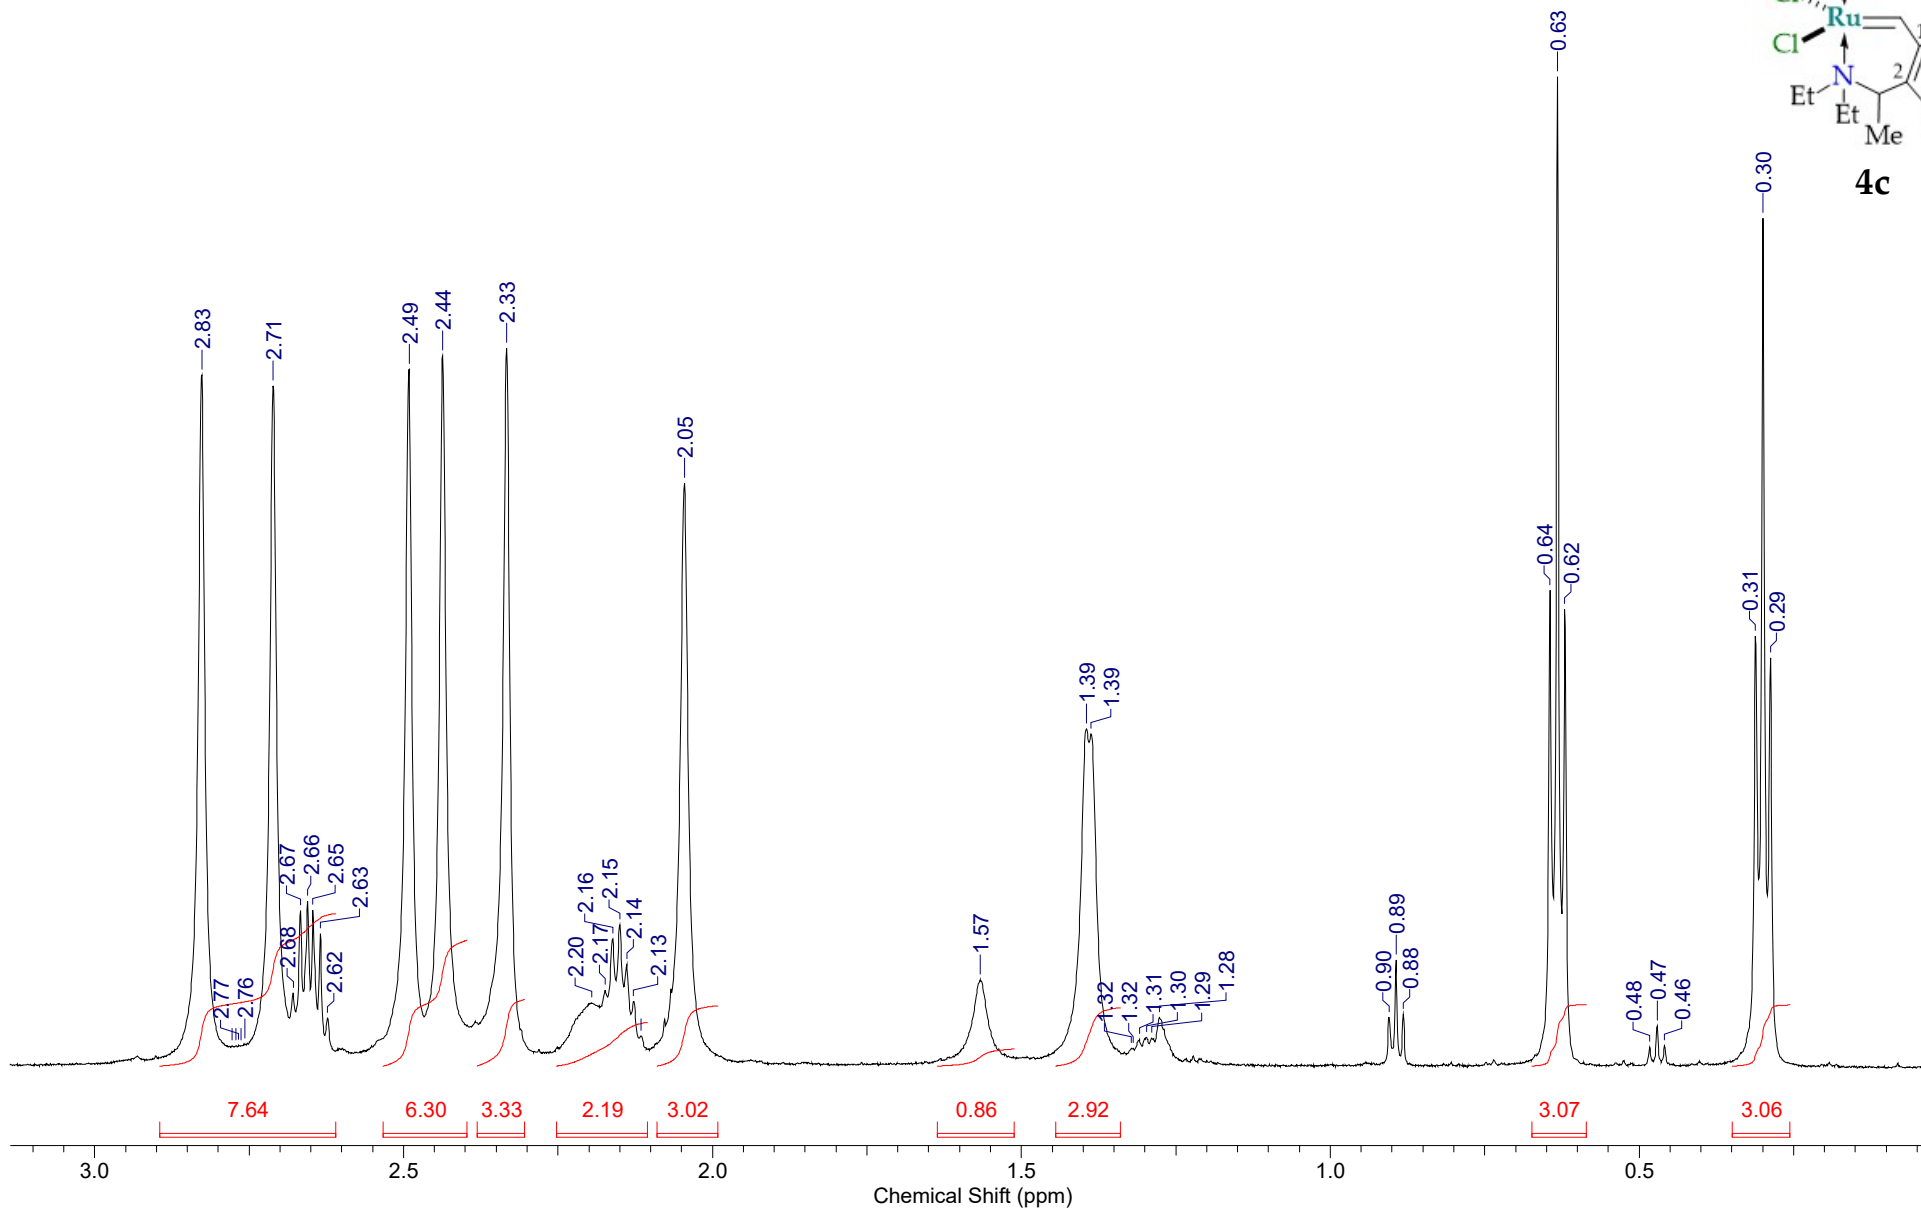

# $^{13}\text{C}$ spectrum of compound **4c**

|                        |          |           |                                  |                      |                      |
|------------------------|----------|-----------|----------------------------------|----------------------|----------------------|
| Acquisition Time (sec) | 1.7197   | Comment   | single pulse decoupled gated NOE | Date                 | 19 Jan 2023 06:46:31 |
| Date Stamp             |          | File Name |                                  |                      |                      |
| Frequency (MHz)        | 150.91   | Nucleus   | $^{13}\text{C}$                  | Number of Transients | 4000                 |
| Original Points Count  | 131072   | Owner     | CKP                              | Points Count         | 131072               |
| Receiver Gain          | 56.00    | Solvent   | CHLOROFORM-d                     | Pulse Sequence       | single pulse dec     |
| Sweep Width (Hz)       | 76219.52 |           |                                  | Spectrum Offset (Hz) | 25629.8613           |

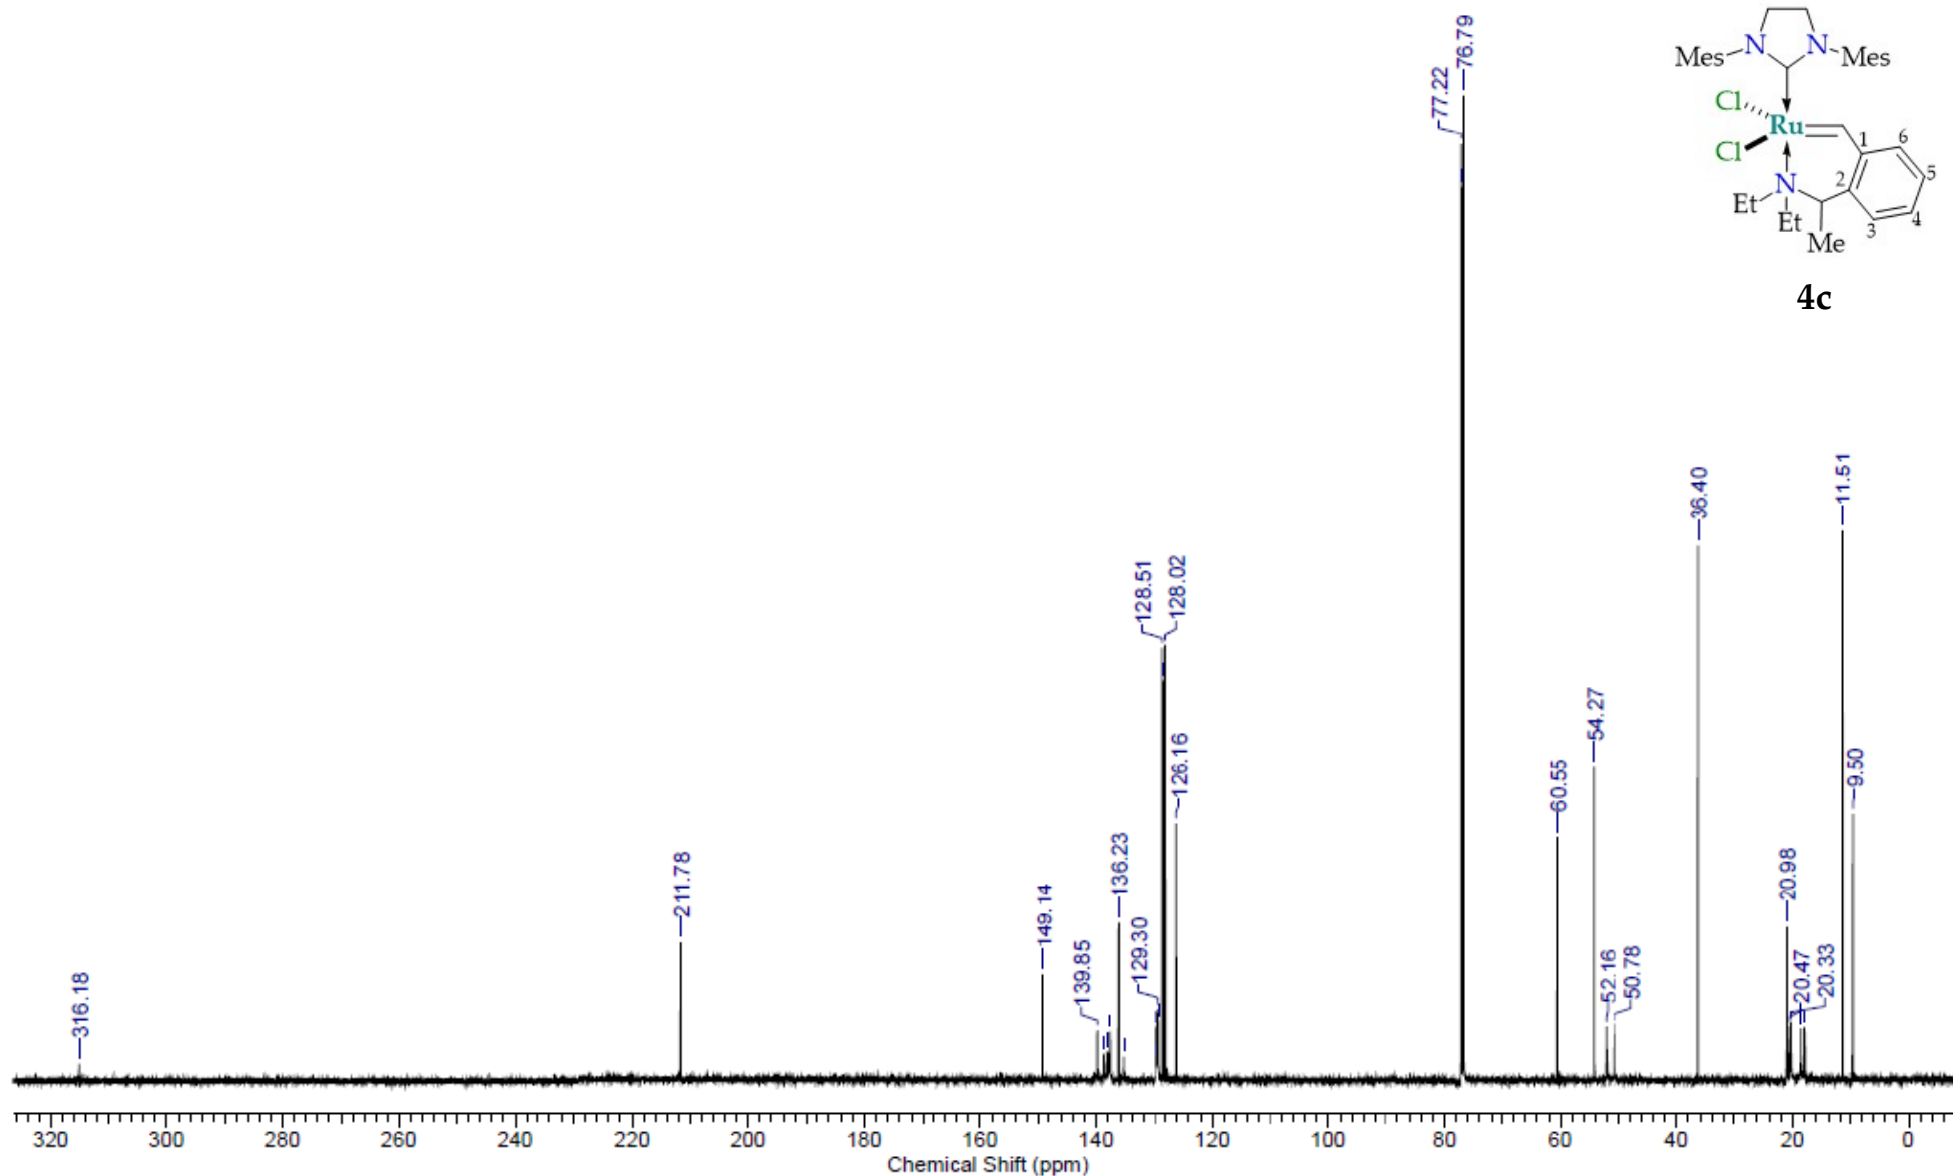

# $^{13}\text{C}$ spectrum of compound **4c**

|                                                                           |                      |
|---------------------------------------------------------------------------|----------------------|
| <b>Formula</b> $\text{C}_{15}\text{H}_{22}\text{Cl}_2\text{N}_3\text{Ru}$ | <b>FW</b> 416.3313+? |
|---------------------------------------------------------------------------|----------------------|

|                                        |                                                 |                                        |
|----------------------------------------|-------------------------------------------------|----------------------------------------|
| <b>Acquisition Time (sec)</b> 0.6921   | <b>Comment</b> single pulse decoupled gated NOE | <b>Date</b> 12 Jan 2023 09:51:21       |
| <b>Date Stamp</b> 12 Jan 2023 08:48:40 | <b>File Name</b>                                |                                        |
| <b>Frequency (MHz)</b> 150.91          | <b>Nucleus</b> $^{13}\text{C}$                  | <b>Number of Transients</b> 3401       |
| <b>Original Points Count</b> 32768     | <b>Owner</b> CKP                                | <b>Points Count</b> 32768              |
| <b>Receiver Gain</b> 56.00             | <b>Solvent</b> CHLOROFORM-d                     | <b>Pulse Sequence</b> single pulse dec |
| <b>Sweep Width (Hz)</b> 47348.49       |                                                 | <b>Spectrum Offset (Hz)</b> 15065.9502 |

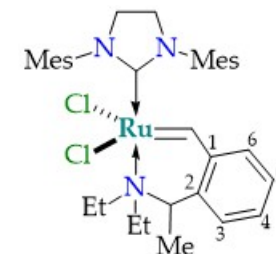

**4c**

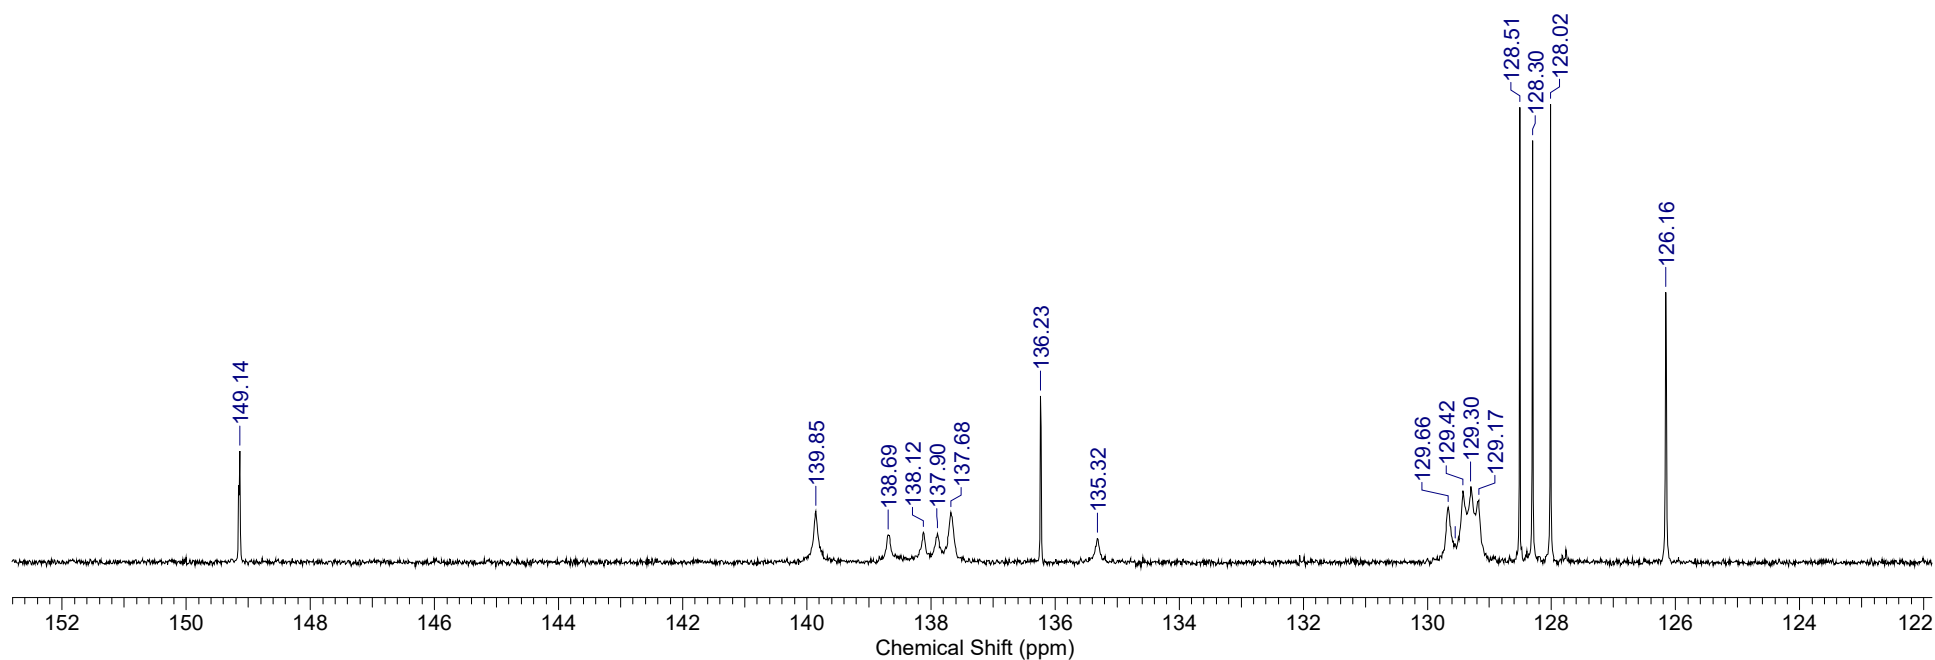

# $^{13}\text{C}$ spectrum of compound **4c**

|                                                                           |                      |
|---------------------------------------------------------------------------|----------------------|
| <b>Formula</b> $\text{C}_{15}\text{H}_{22}\text{Cl}_2\text{N}_2\text{Ru}$ | <b>FW</b> 416.3313+? |
|---------------------------------------------------------------------------|----------------------|

|                                        |                                                 |                                        |
|----------------------------------------|-------------------------------------------------|----------------------------------------|
| <b>Acquisition Time (sec)</b> 0.6921   | <b>Comment</b> single pulse decoupled gated NOE | <b>Date</b> 12 Jan 2023 09:51:21       |
| <b>Date Stamp</b> 12 Jan 2023 08:48:40 | <b>File Name</b>                                |                                        |
| <b>Frequency (MHz)</b> 150.91          | <b>Nucleus</b> $^{13}\text{C}$                  | <b>Number of Transients</b> 3401       |
| <b>Original Points Count</b> 32768     | <b>Owner</b> CKP                                | <b>Points Count</b> 32768              |
| <b>Receiver Gain</b> 56.00             | <b>Solvent</b> CHLOROFORM-d                     | <b>Pulse Sequence</b> single pulse dec |
| <b>Sweep Width (Hz)</b> 47348.49       |                                                 | <b>Spectrum Offset (Hz)</b> 15065.9502 |

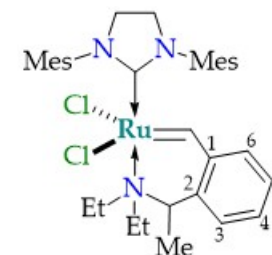

**4c**

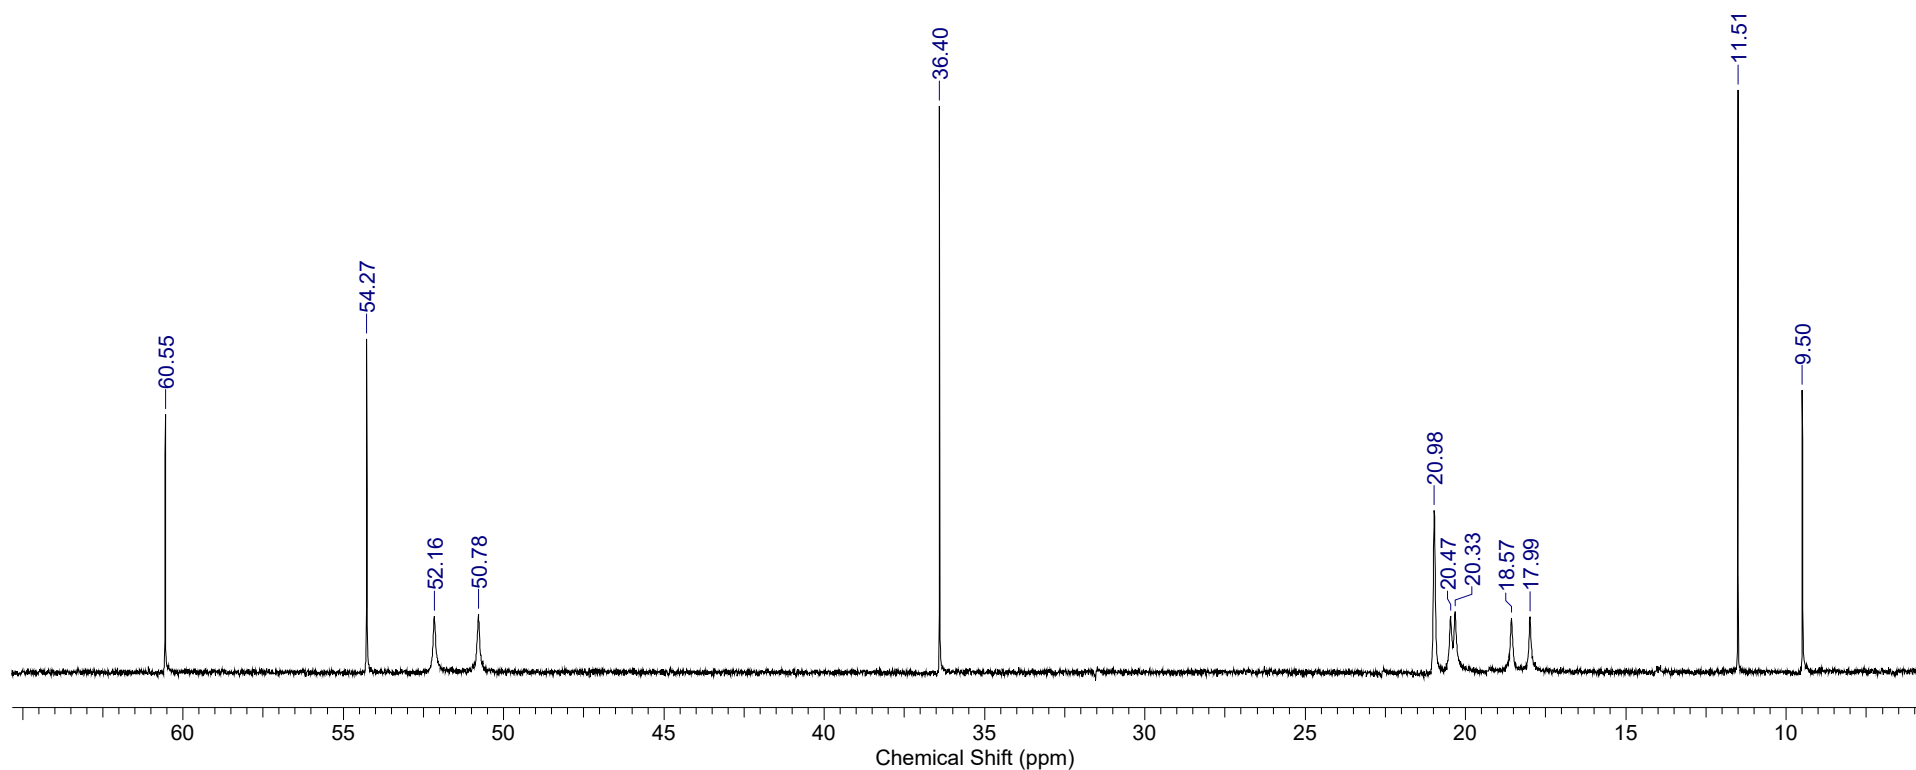



# IR spectrum of compound 4c

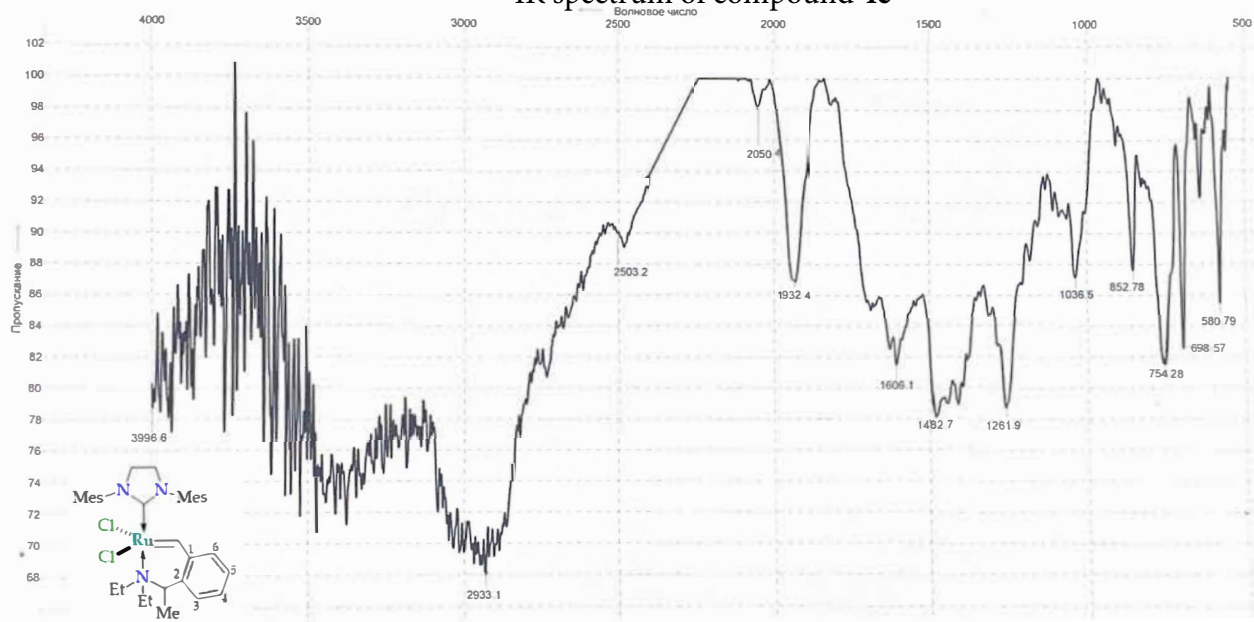

# MALDI-ToF MS of compound 4c

## Display Report

### Analysis Info

Analysis Name D:\Data\Surzhikova\MVGA-4c.d  
Method tune\_100-1200.m  
Sample Name  
Comment

Acquisition Date 12.01.2023 13:17:40

Operator BDAL@DE  
Instrument / Ser# maXis 43

### Acquisition Parameter

|             |          |                      |          |                  |           |
|-------------|----------|----------------------|----------|------------------|-----------|
| Source Type | ESI      | Ion Polarity         | Positive | Set Nebulizer    | 1.0 Bar   |
| Focus       | Active   |                      |          | Set Dry Heater   | 200 °C    |
| Scan Begin  | 50 m/z   | Set Capillary        | 4500 V   | Set Dry Gas      | 4.0 l/min |
| Scan End    | 1800 m/z | Set End Plate Offset | -500 V   | Set Divert Valve | Waste     |

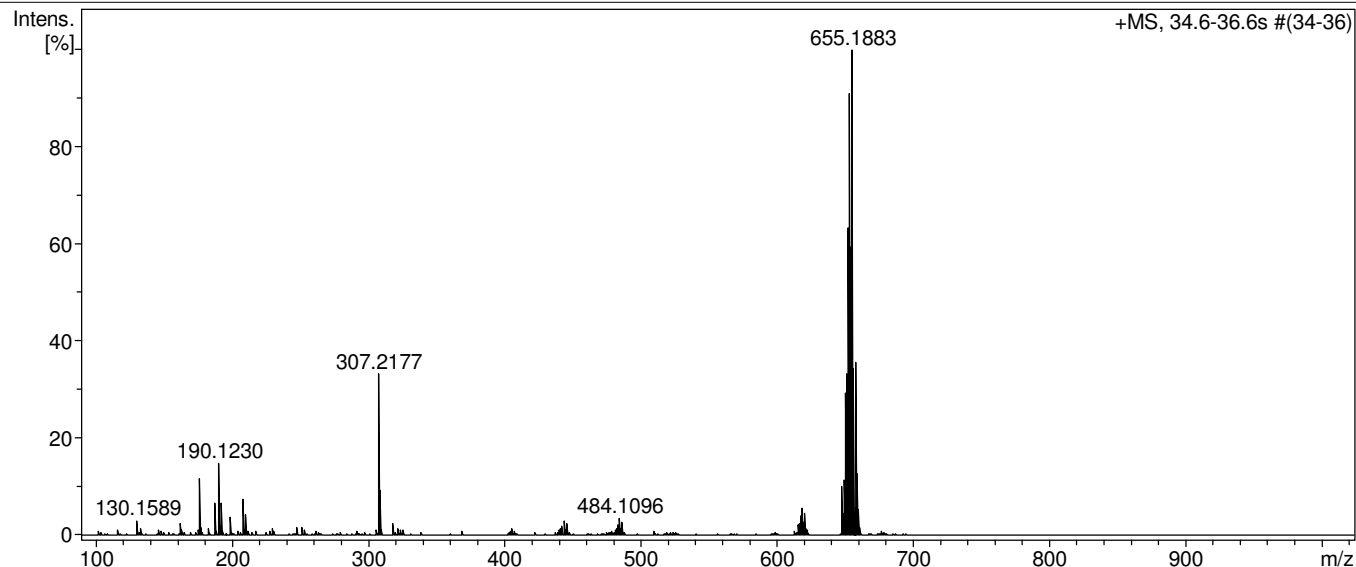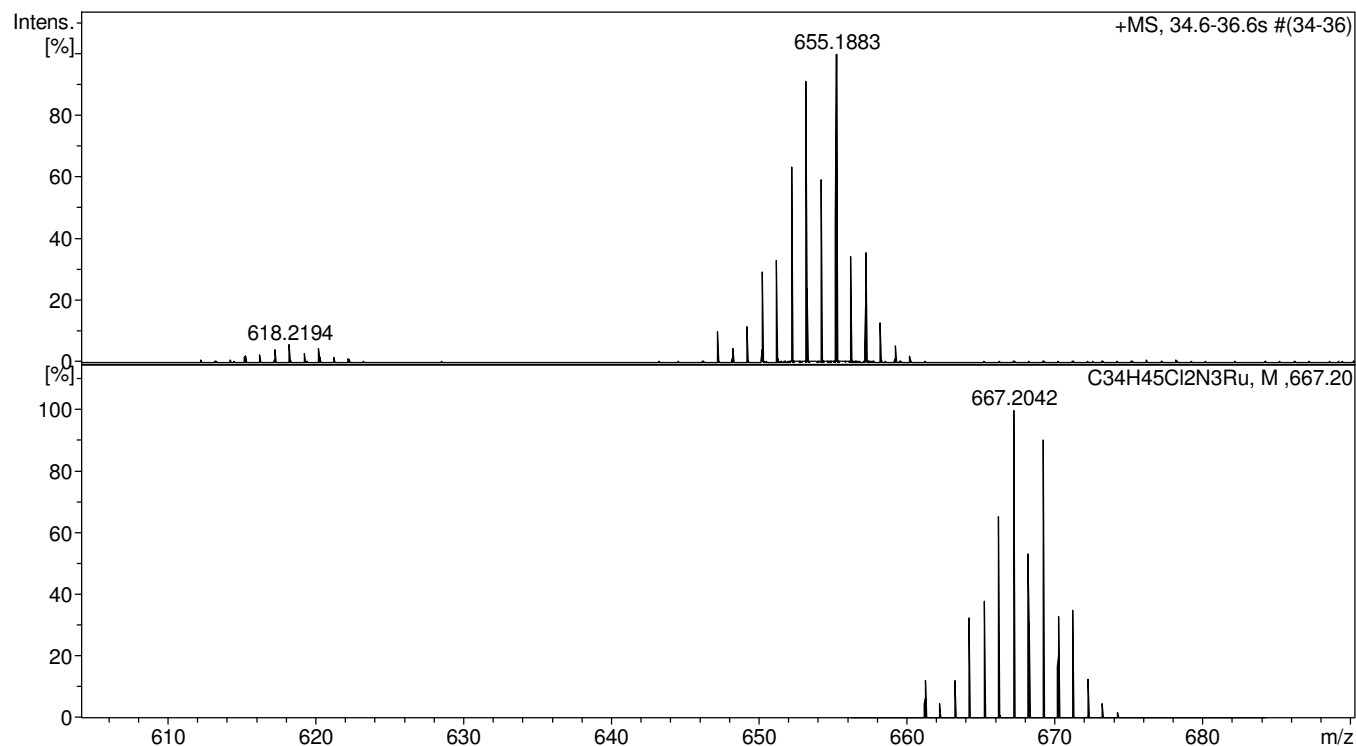

# <sup>1</sup>H spectrum of compound 4d

|                        |                      |                      |              |                       |                        |
|------------------------|----------------------|----------------------|--------------|-----------------------|------------------------|
| Acquisition Time (sec) | 1.9818               | Comment              | single_pulse | Date                  | 27 Oct 2022 08:24:45   |
| Date Stamp             | 27 Oct 2022 08:10:30 |                      |              |                       |                        |
| File Name              |                      |                      |              |                       | Frequency (MHz) 600.17 |
| Nucleus                | 1H                   | Number of Transients | 8            | Origin                | ECA 600                |
| Owner                  | CKP                  | Points Count         | 32768        | Pulse Sequence        | single_pulse.ex2       |
| Solvent                | CHLOROFORM-d         | Spectrum Offset (Hz) | 5413.5884    | Sweep Width (Hz)      | 16534.39               |
|                        |                      |                      |              | Original Points Count | 32768                  |
|                        |                      |                      |              | Receiver Gain         | 40.00                  |

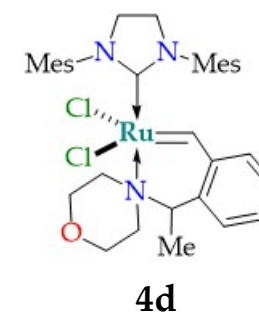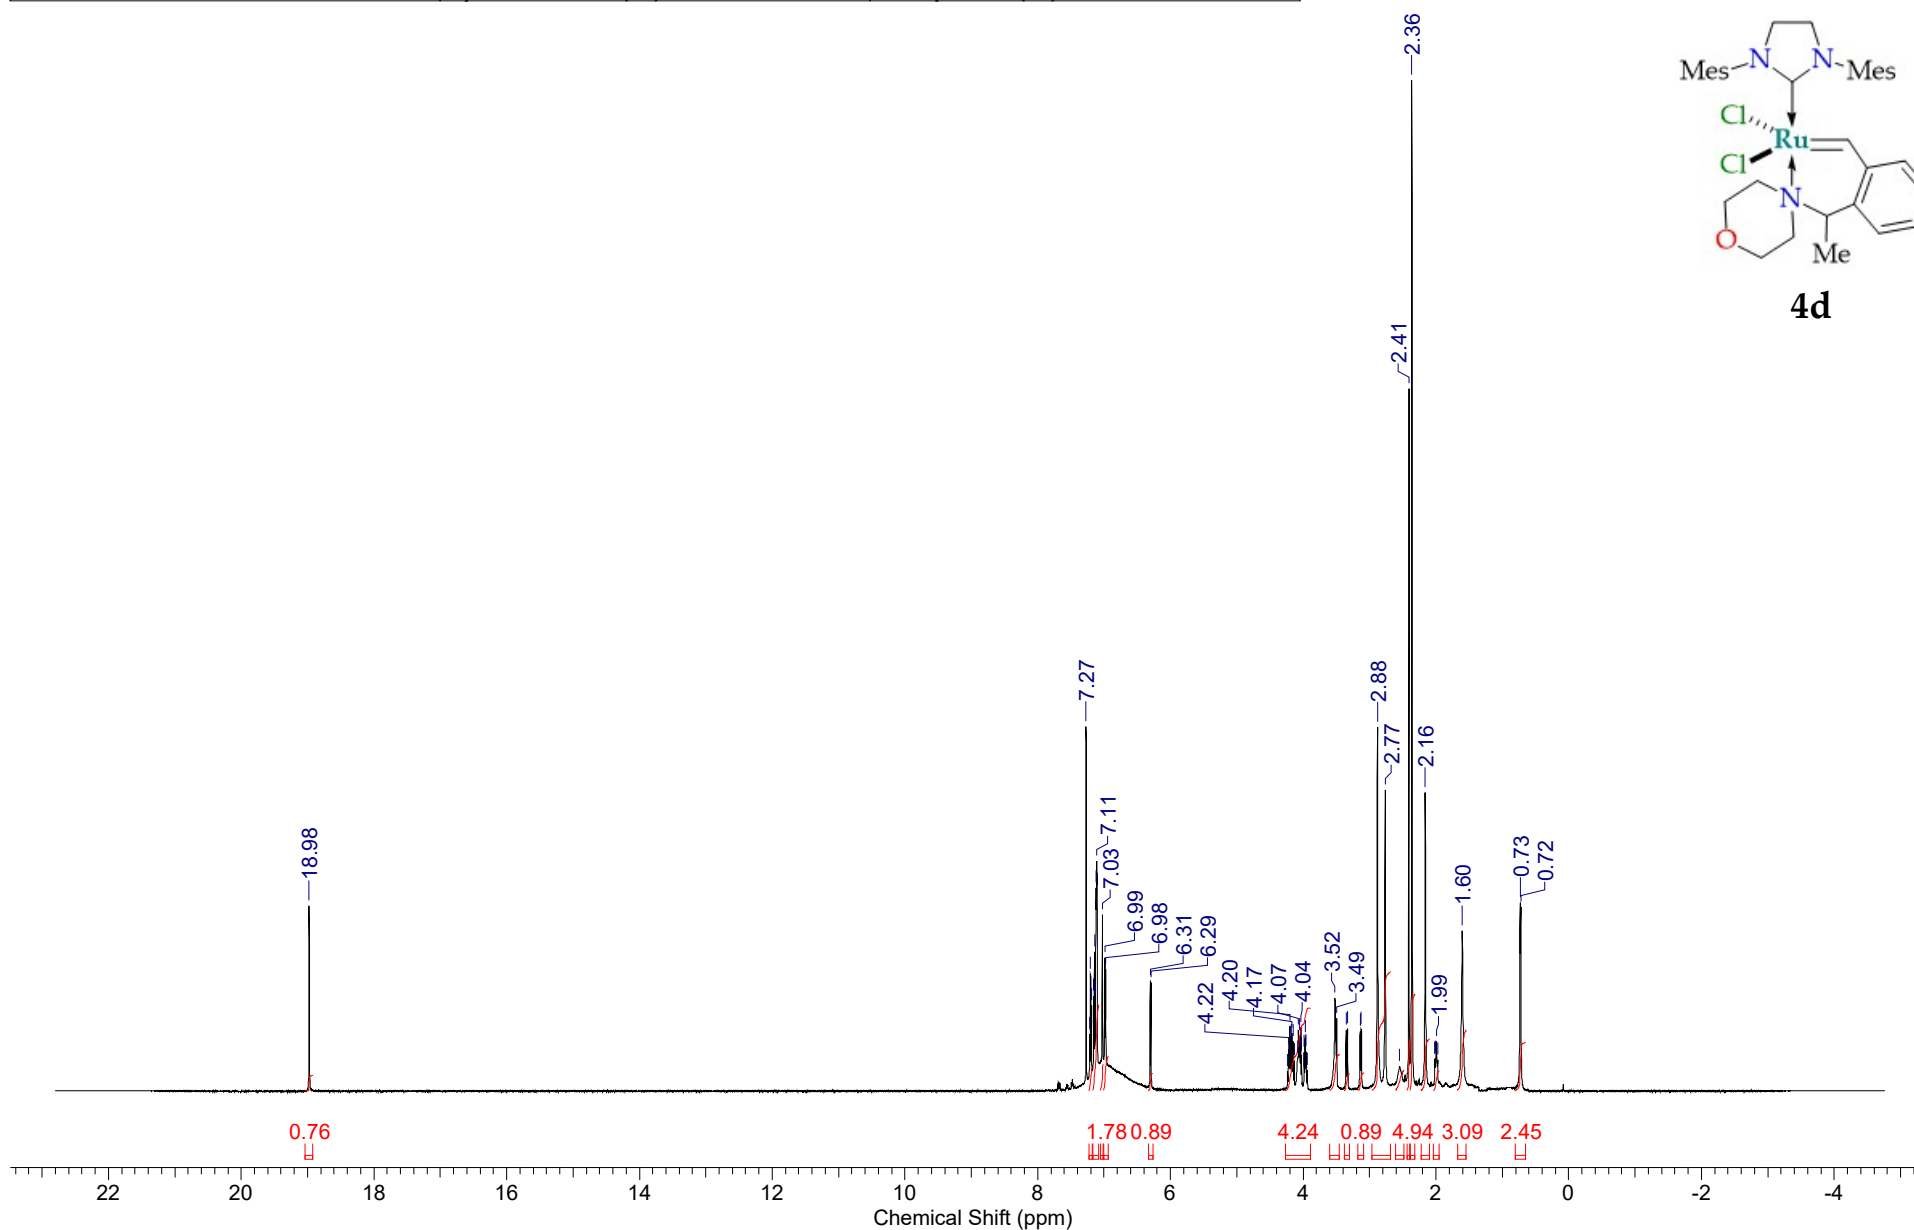

# $^1\text{H}$ spectrum of compound **4d**

|                        |                      |                      |              |                       |                      |
|------------------------|----------------------|----------------------|--------------|-----------------------|----------------------|
| Acquisition Time (sec) | 1.9818               | Comment              | single_pulse | Date                  | 27 Oct 2022 08:24:45 |
| Date Stamp             | 27 Oct 2022 08:10:30 |                      |              |                       |                      |
| File Name              |                      |                      |              | Frequency (MHz)       | 600.17               |
| Nucleus                | $^1\text{H}$         | Number of Transients | 8            | Origin                | ECA 600              |
| Owner                  | CKP                  | Points Count         | 32768        | Pulse Sequence        | single_pulse.ex2     |
| Solvent                | CHLOROFORM-d         | Spectrum Offset (Hz) | 5413.5884    | Sweep Width (Hz)      | 16534.39             |
|                        |                      |                      |              | Original Points Count | 32768                |
|                        |                      |                      |              | Receiver Gain         | 40.00                |

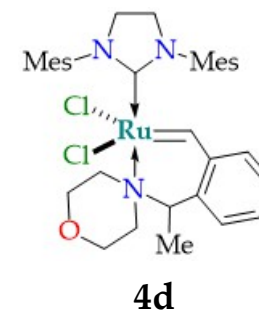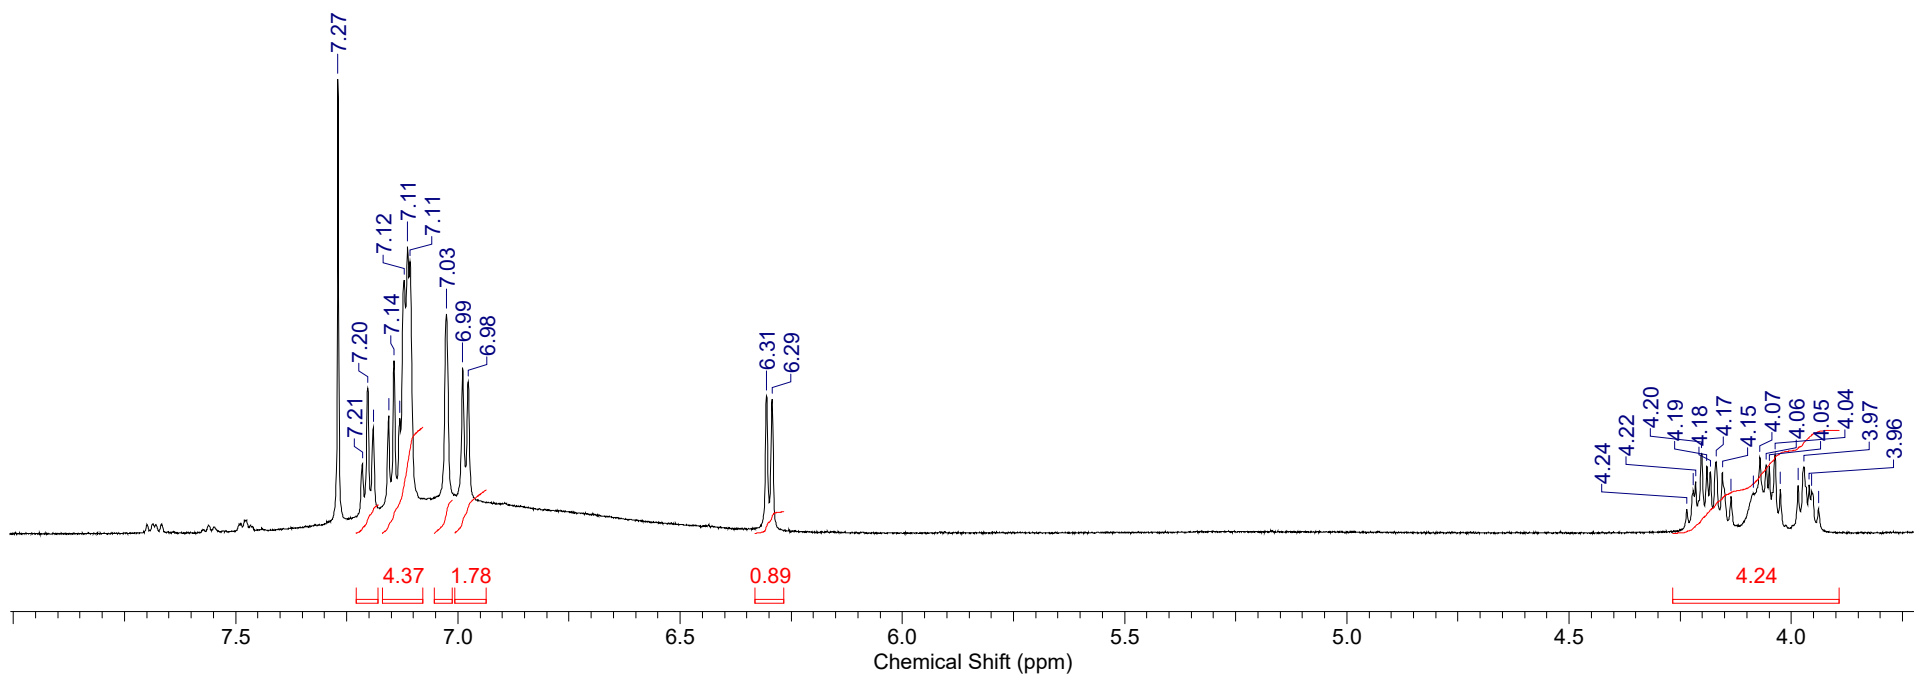

# $^1\text{H}$ spectrum of compound **4d**

|                        |                      |                      |              |                       |                      |
|------------------------|----------------------|----------------------|--------------|-----------------------|----------------------|
| Acquisition Time (sec) | 1.9818               | Comment              | single_pulse | Date                  | 27 Oct 2022 08:24:45 |
| Date Stamp             | 27 Oct 2022 08:10:30 |                      |              |                       |                      |
| File Name              |                      |                      |              | Frequency (MHz)       | 600.17               |
| Nucleus                | $^1\text{H}$         | Number of Transients | 8            | Origin                | ECA 600              |
| Owner                  | CKP                  | Points Count         | 32768        | Pulse Sequence        | single_pulse.ex2     |
| Solvent                | CHLOROFORM-d         | Spectrum Offset (Hz) | 5413.5884    | Sweep Width (Hz)      | 16534.39             |
|                        |                      |                      |              | Original Points Count | 32768                |
|                        |                      |                      |              | Receiver Gain         | 40.00                |

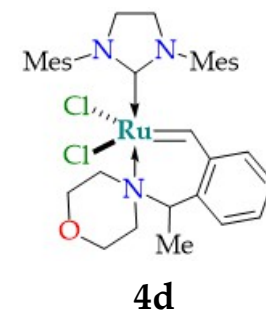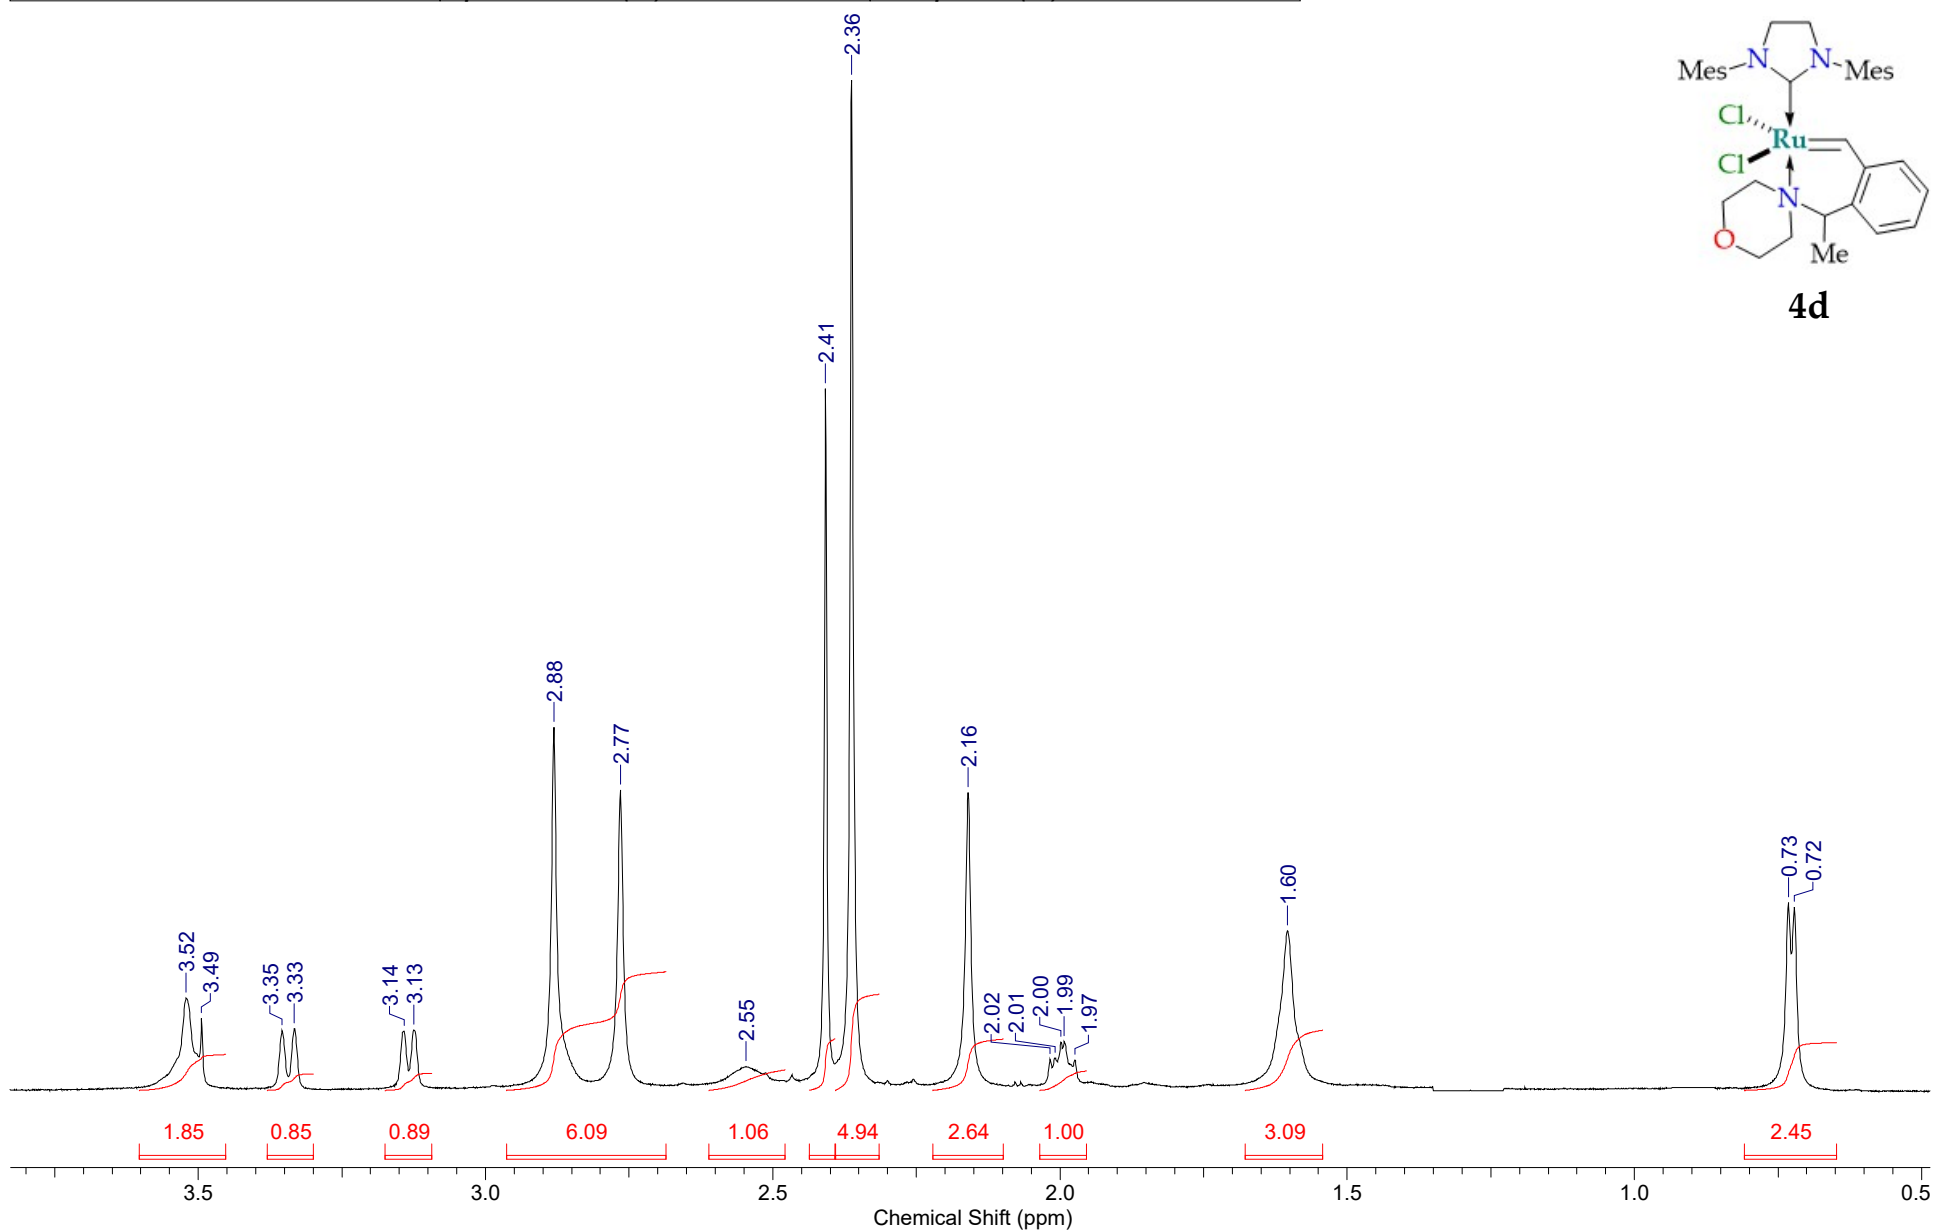

# $^{13}\text{C}$ spectrum of compound **4d**

|                               |                      |                  |                                  |                             |                      |
|-------------------------------|----------------------|------------------|----------------------------------|-----------------------------|----------------------|
| <b>Acquisition Time (sec)</b> | 1.7197               | <b>Comment</b>   | single pulse decoupled gated NOE | <b>Date</b>                 | 18 Jan 2023 17:46:18 |
| <b>Date Stamp</b>             | 18 Jan 2023 16:43:47 | <b>File Name</b> |                                  |                             |                      |
| <b>Frequency (MHz)</b>        | 150.91               | <b>Nucleus</b>   | $^{13}\text{C}$                  | <b>Number of Transients</b> | 4000                 |
| <b>Original Points Count</b>  | 131072               | <b>Owner</b>     | CKP                              | <b>Points Count</b>         | 131072               |
| <b>Receiver Gain</b>          | 54.00                | <b>Solvent</b>   | CHLOROFORM-d                     | <b>Pulse Sequence</b>       | single pulse dec     |
| <b>Sweep Width (Hz)</b>       | 76219.52             |                  |                                  | <b>Spectrum Offset (Hz)</b> | 25631.6035           |

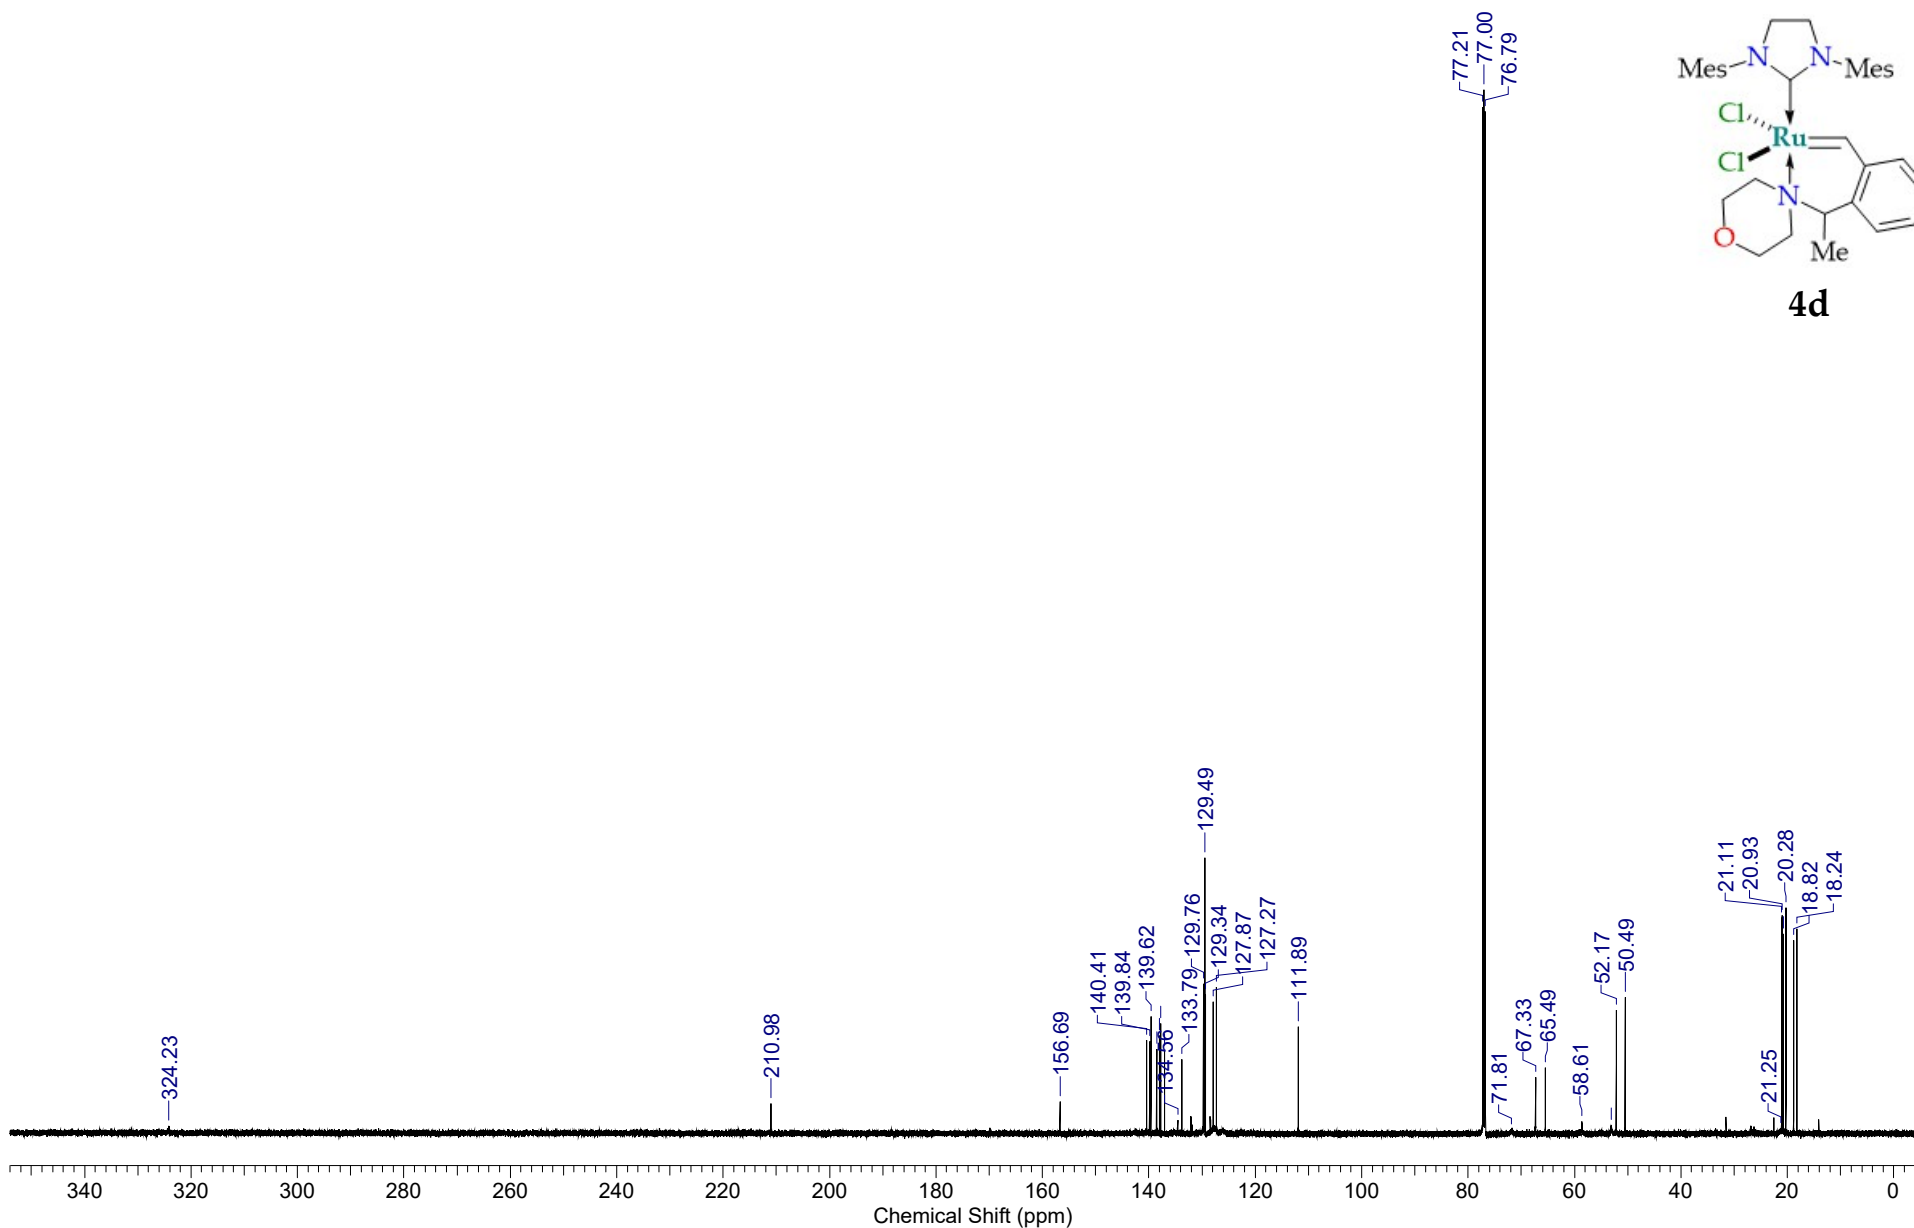

# $^{13}\text{C}$ spectrum of compound **4d**

|                               |                      |                  |                                  |                             |                      |
|-------------------------------|----------------------|------------------|----------------------------------|-----------------------------|----------------------|
| <b>Acquisition Time (sec)</b> | 0.6921               | <b>Comment</b>   | single pulse decoupled gated NOE | <b>Date</b>                 | 13 Jan 2023 00:48:39 |
| <b>Date Stamp</b>             | 12 Jan 2023 17:58:14 | <b>File Name</b> |                                  |                             |                      |
| <b>Frequency (MHz)</b>        | 150.91               | <b>Nucleus</b>   | $^{13}\text{C}$                  | <b>Number of Transients</b> | 4000                 |
| <b>Original Points Count</b>  | 32768                | <b>Owner</b>     | CKP                              | <b>Points Count</b>         | 32768                |
| <b>Receiver Gain</b>          | 58.00                | <b>Solvent</b>   | CHLOROFORM-d                     | <b>Pulse Sequence</b>       | single pulse dec     |
| <b>Sweep Width (Hz)</b>       | 47348.49             |                  |                                  | <b>Spectrum Offset (Hz)</b> | 15065.9502           |

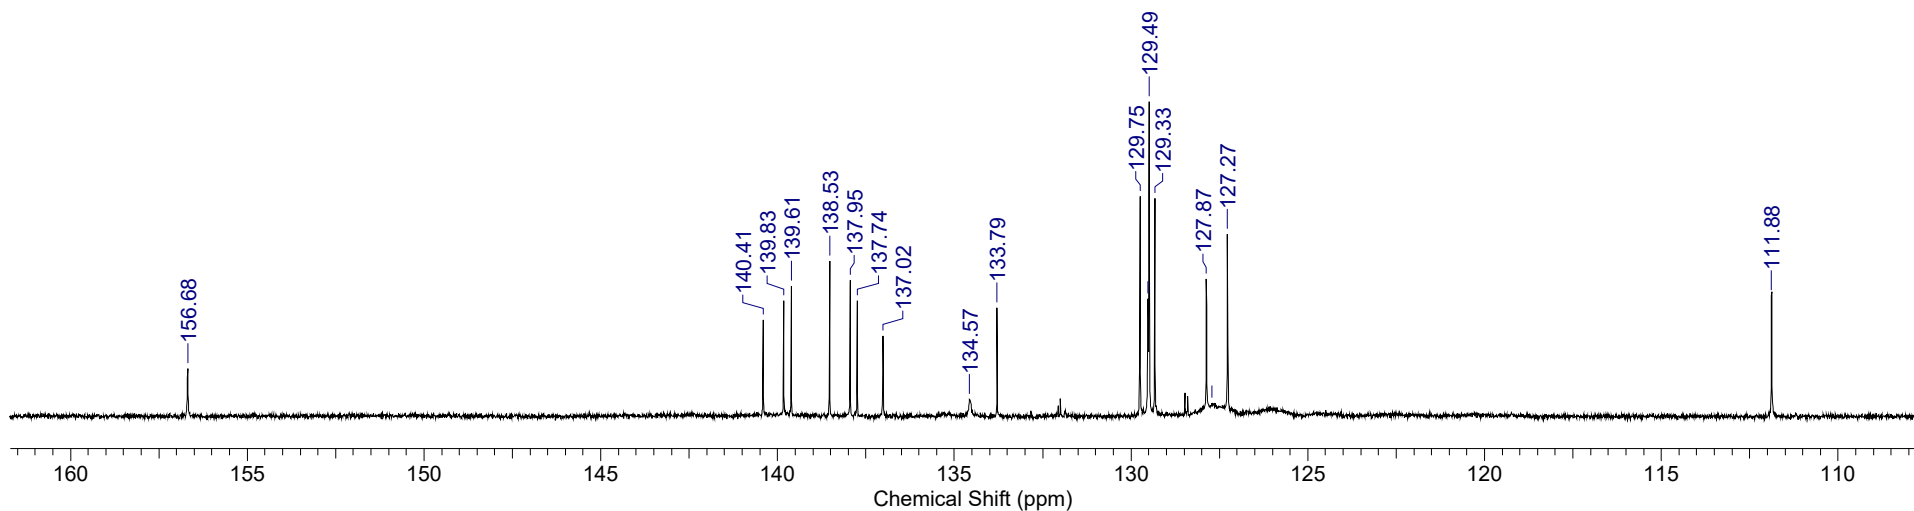

# $^{13}\text{C}$ spectrum of compound **4d**

|                                 |  |                                          |  |                                 |  |
|---------------------------------|--|------------------------------------------|--|---------------------------------|--|
| Acquisition Time (sec) 0.6921   |  | Comment single pulse decoupled gated NOE |  | Date 13 Jan 2023 00:48:39       |  |
| Date Stamp 12 Jan 2023 17:58:14 |  | File Name                                |  |                                 |  |
| Frequency (MHz) 150.91          |  | Nucleus 13C                              |  | Number of Transients 4000       |  |
| Original Points Count 32768     |  | Owner CKP                                |  | Points Count 32768              |  |
| Receiver Gain 58.00             |  | Solvent CHLOROFORM-d                     |  | Pulse Sequence single_pulse_dec |  |
| Sweep Width (Hz) 47348.49       |  |                                          |  | Spectrum Offset (Hz) 15065.9502 |  |

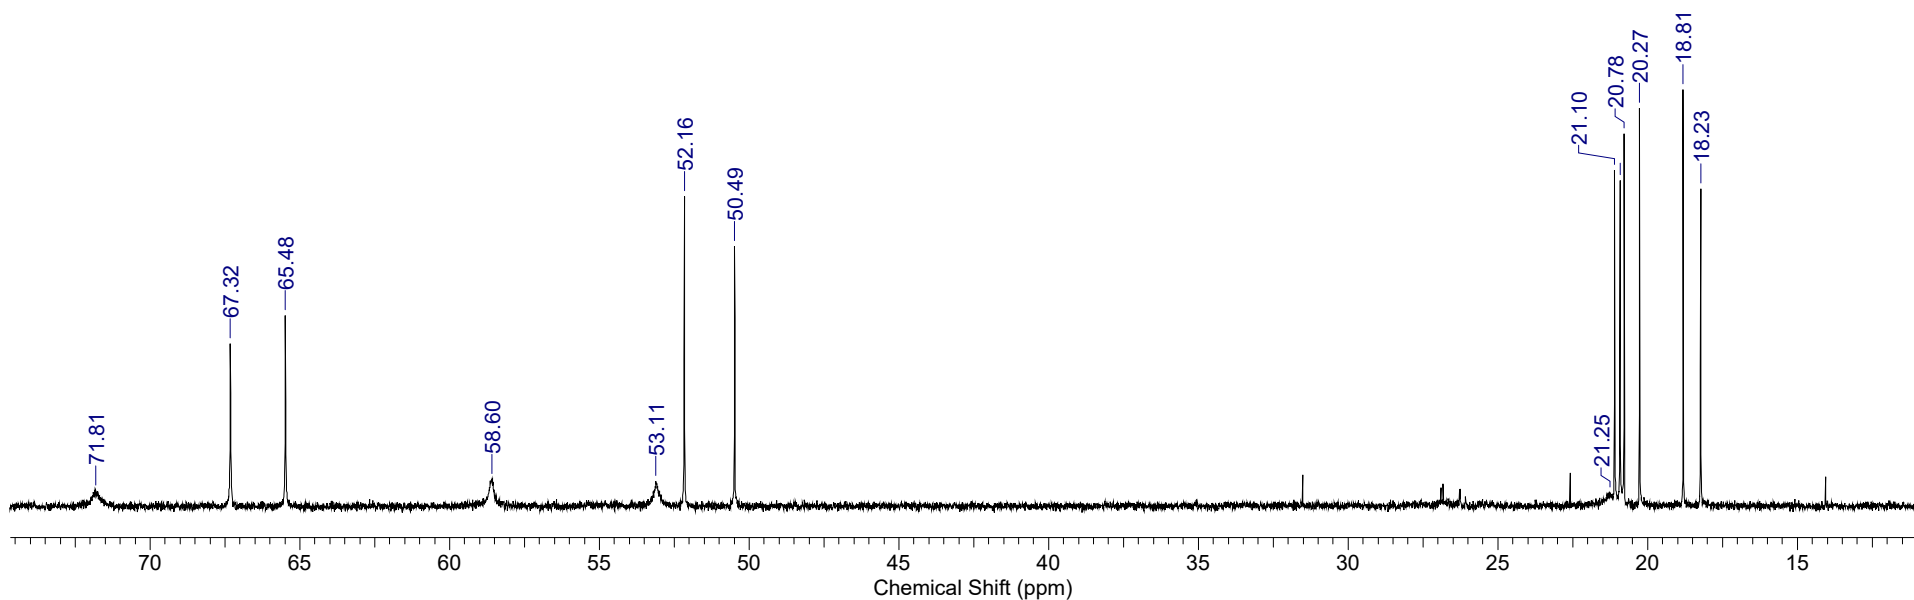



# IR spectrum of compound 4d

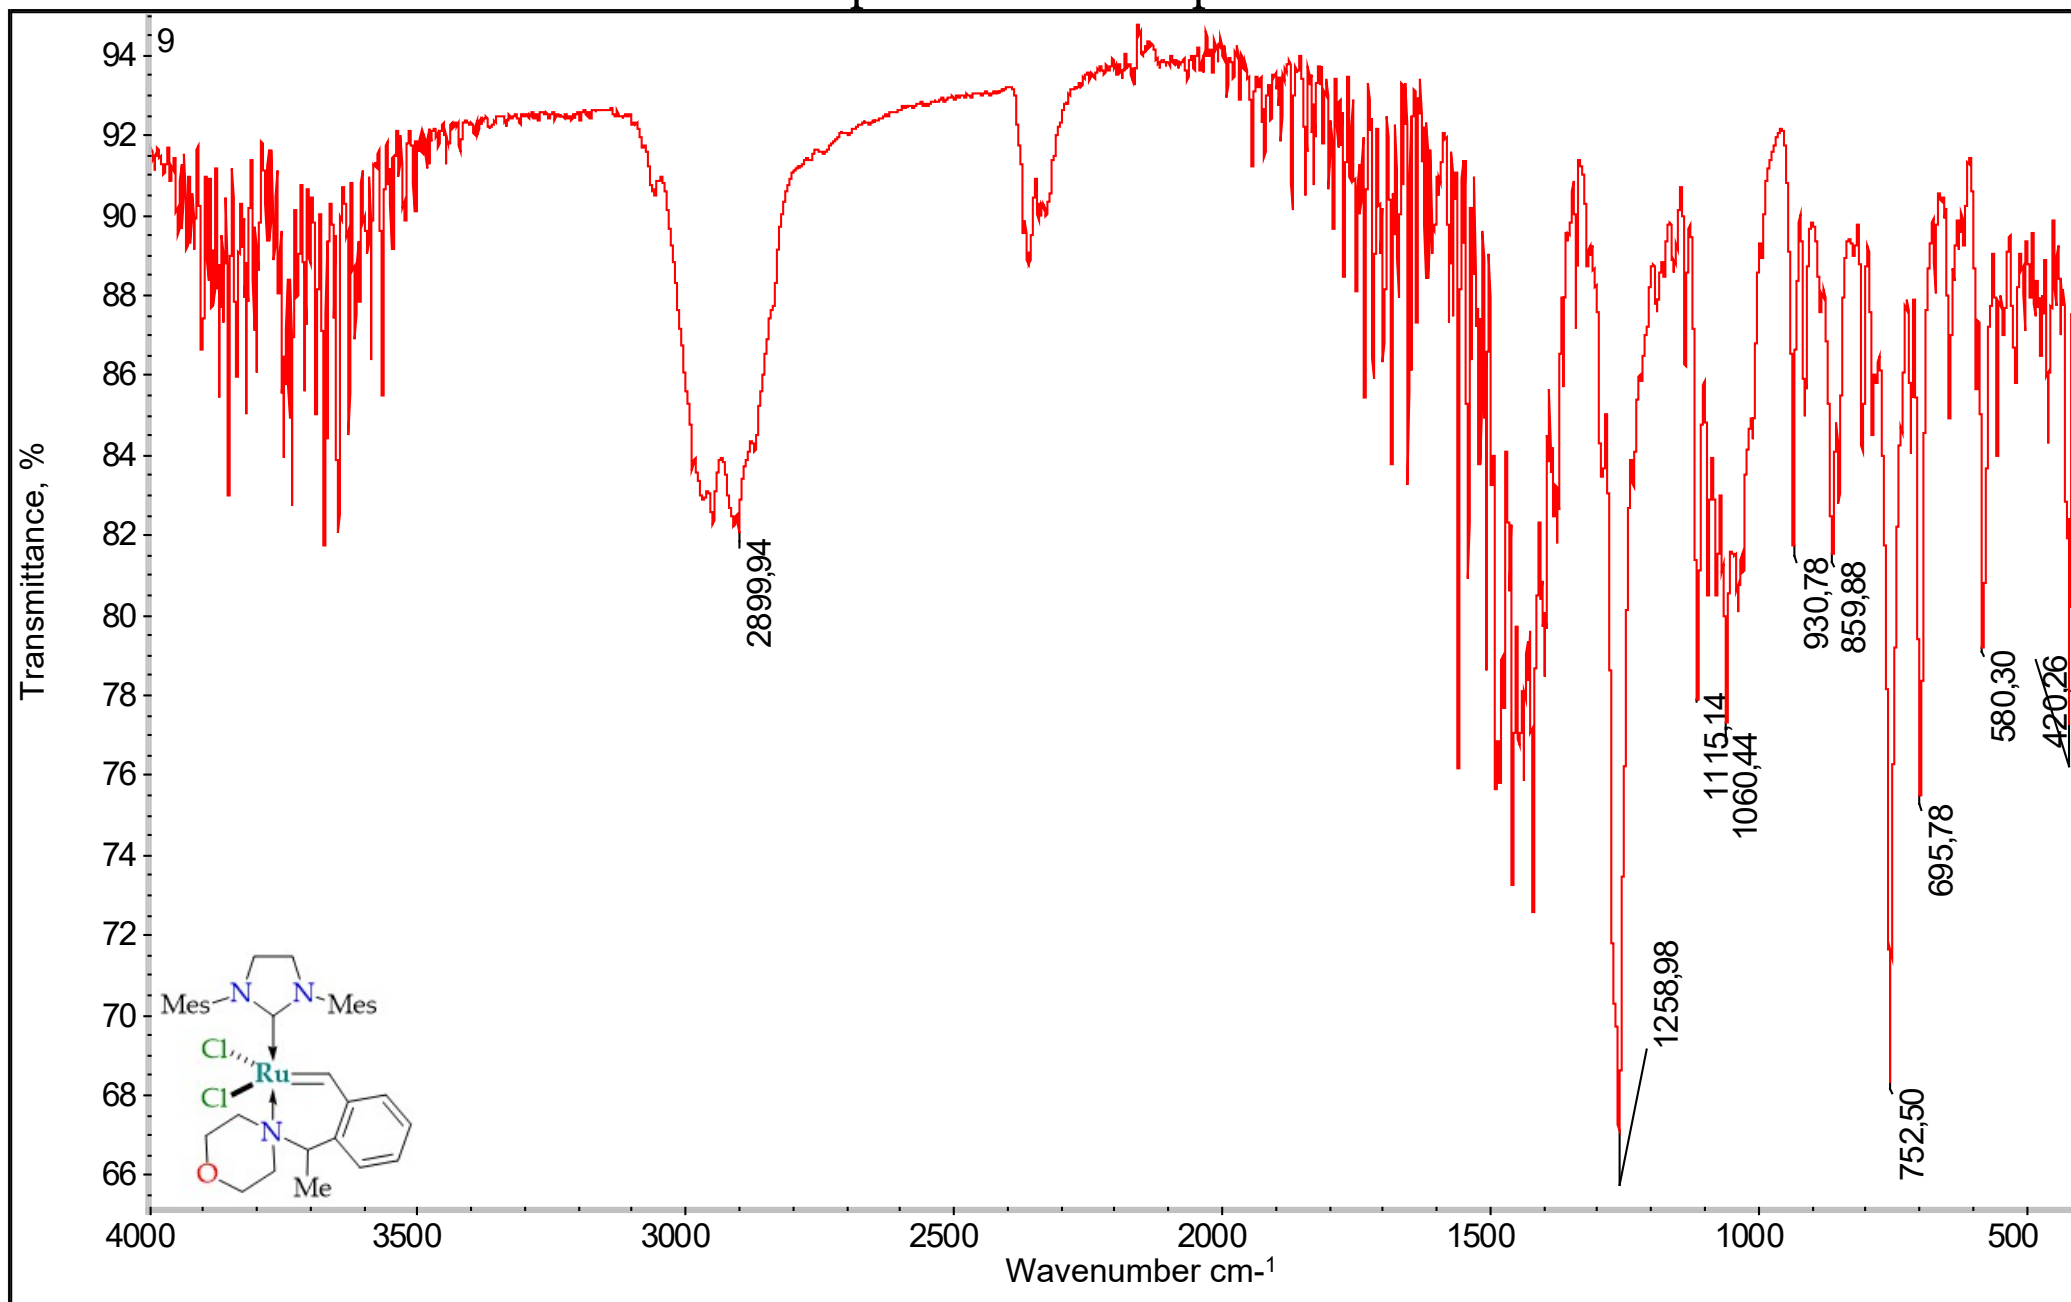

# $^1\text{H}$ spectrum of compound 5a

|                        |                      |           |              |                      |                      |
|------------------------|----------------------|-----------|--------------|----------------------|----------------------|
| Acquisition Time (sec) | 1.7459               | Comment   | single pulse | Date                 | 23 Jan 2023 17:17:07 |
| Date Stamp             | 23 Jan 2023 16:14:45 | File Name |              |                      |                      |
| Frequency (MHz)        | 600.17               | Nucleus   | $^1\text{H}$ | Number of Transients | 16                   |
| Original Points Count  | 32768                | Owner     | CKP          | Points Count         | 32768                |
| Receiver Gain          | 38.00                | Solvent   | CHLOROFORM-d | Pulse Sequence       | single_pulse.ex2     |
| Sweep Width (Hz)       | 18768.77             |           |              | Spectrum Offset (Hz) | 6614.0498            |

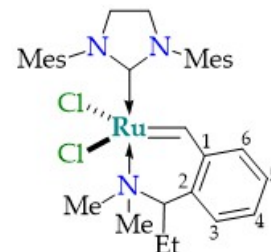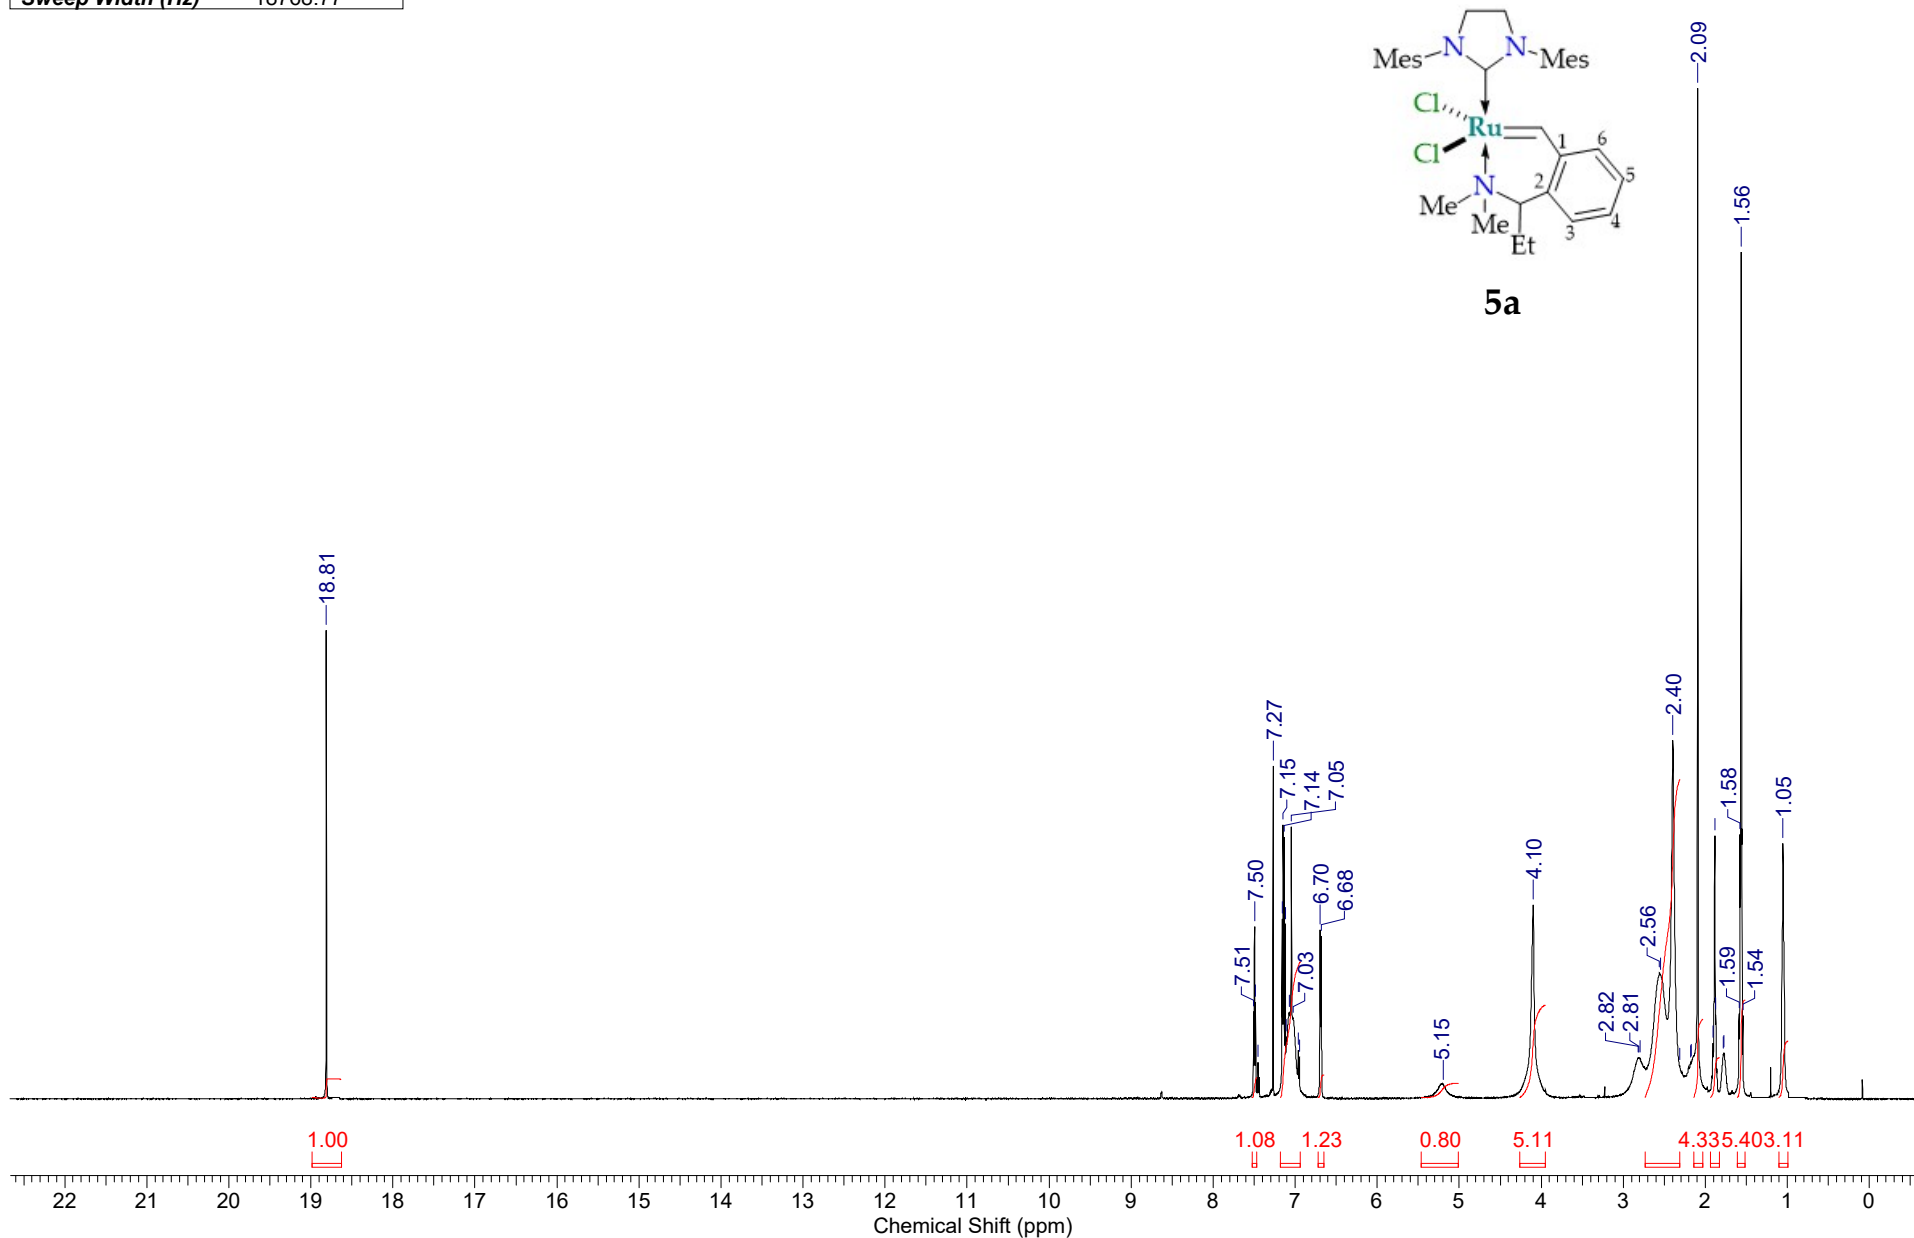

# $^1\text{H}$ spectrum of compound 5a

|                        |                      |                      |              |                      |                      |
|------------------------|----------------------|----------------------|--------------|----------------------|----------------------|
| Acquisition Time (sec) | 1.7459               | Comment              | single pulse | Date                 | 23 Jan 2023 17:17:07 |
| Date Stamp             | 23 Jan 2023 16:14:45 | File Name            |              |                      |                      |
| Frequency (MHz)        | 600.17               | Nucleus              | $^1\text{H}$ | Number of Transients | 16                   |
| Original Points Count  | 32768                | Owner                | CKP          | Points Count         | 32768                |
| Receiver Gain          | 38.00                | Solvent              | CHLOROFORM-d | Pulse Sequence       | single_pulse.ex2     |
| Sweep Width (Hz)       | 18768.77             | Spectrum Offset (Hz) |              |                      |                      |

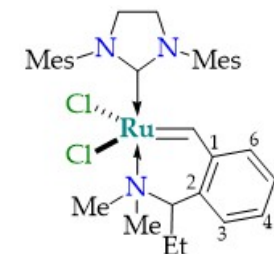

5a

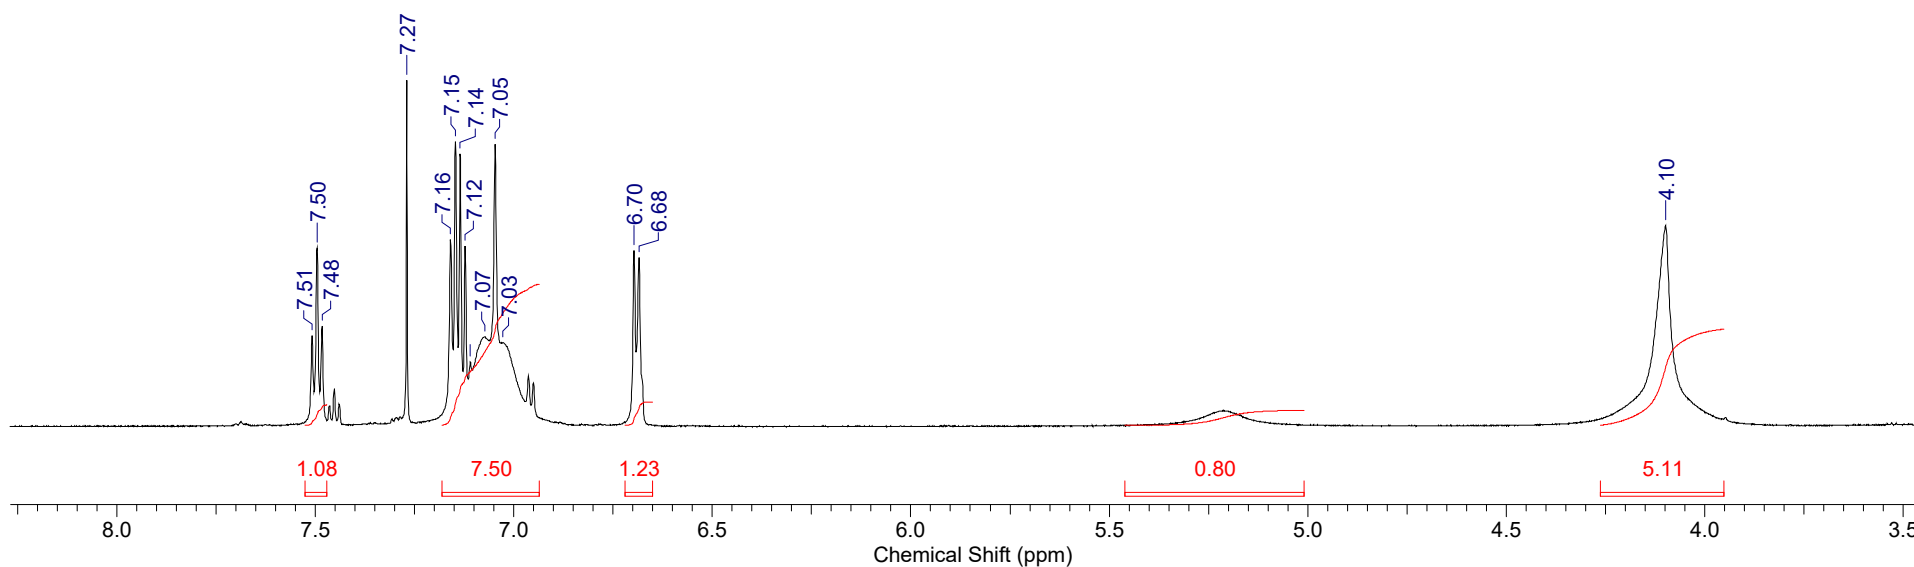

# <sup>1</sup>H spectrum of compound 5a

|                        |                      |           |              |                      |                      |
|------------------------|----------------------|-----------|--------------|----------------------|----------------------|
| Acquisition Time (sec) | 1.7459               | Comment   | single pulse | Date                 | 23 Jan 2023 17:17:07 |
| Date Stamp             | 23 Jan 2023 16:14:45 | File Name |              |                      |                      |
| Frequency (MHz)        | 600.17               | Nucleus   | 1H           | Number of Transients | 16                   |
| Original Points Count  | 32768                | Owner     | CKP          | Points Count         | 32768                |
| Receiver Gain          | 38.00                | Solvent   | CHLOROFORM-d | Pulse Sequence       | single_pulse.ex2     |
| Sweep Width (Hz)       | 18768.77             |           |              | Spectrum Offset (Hz) | 6614.0498            |

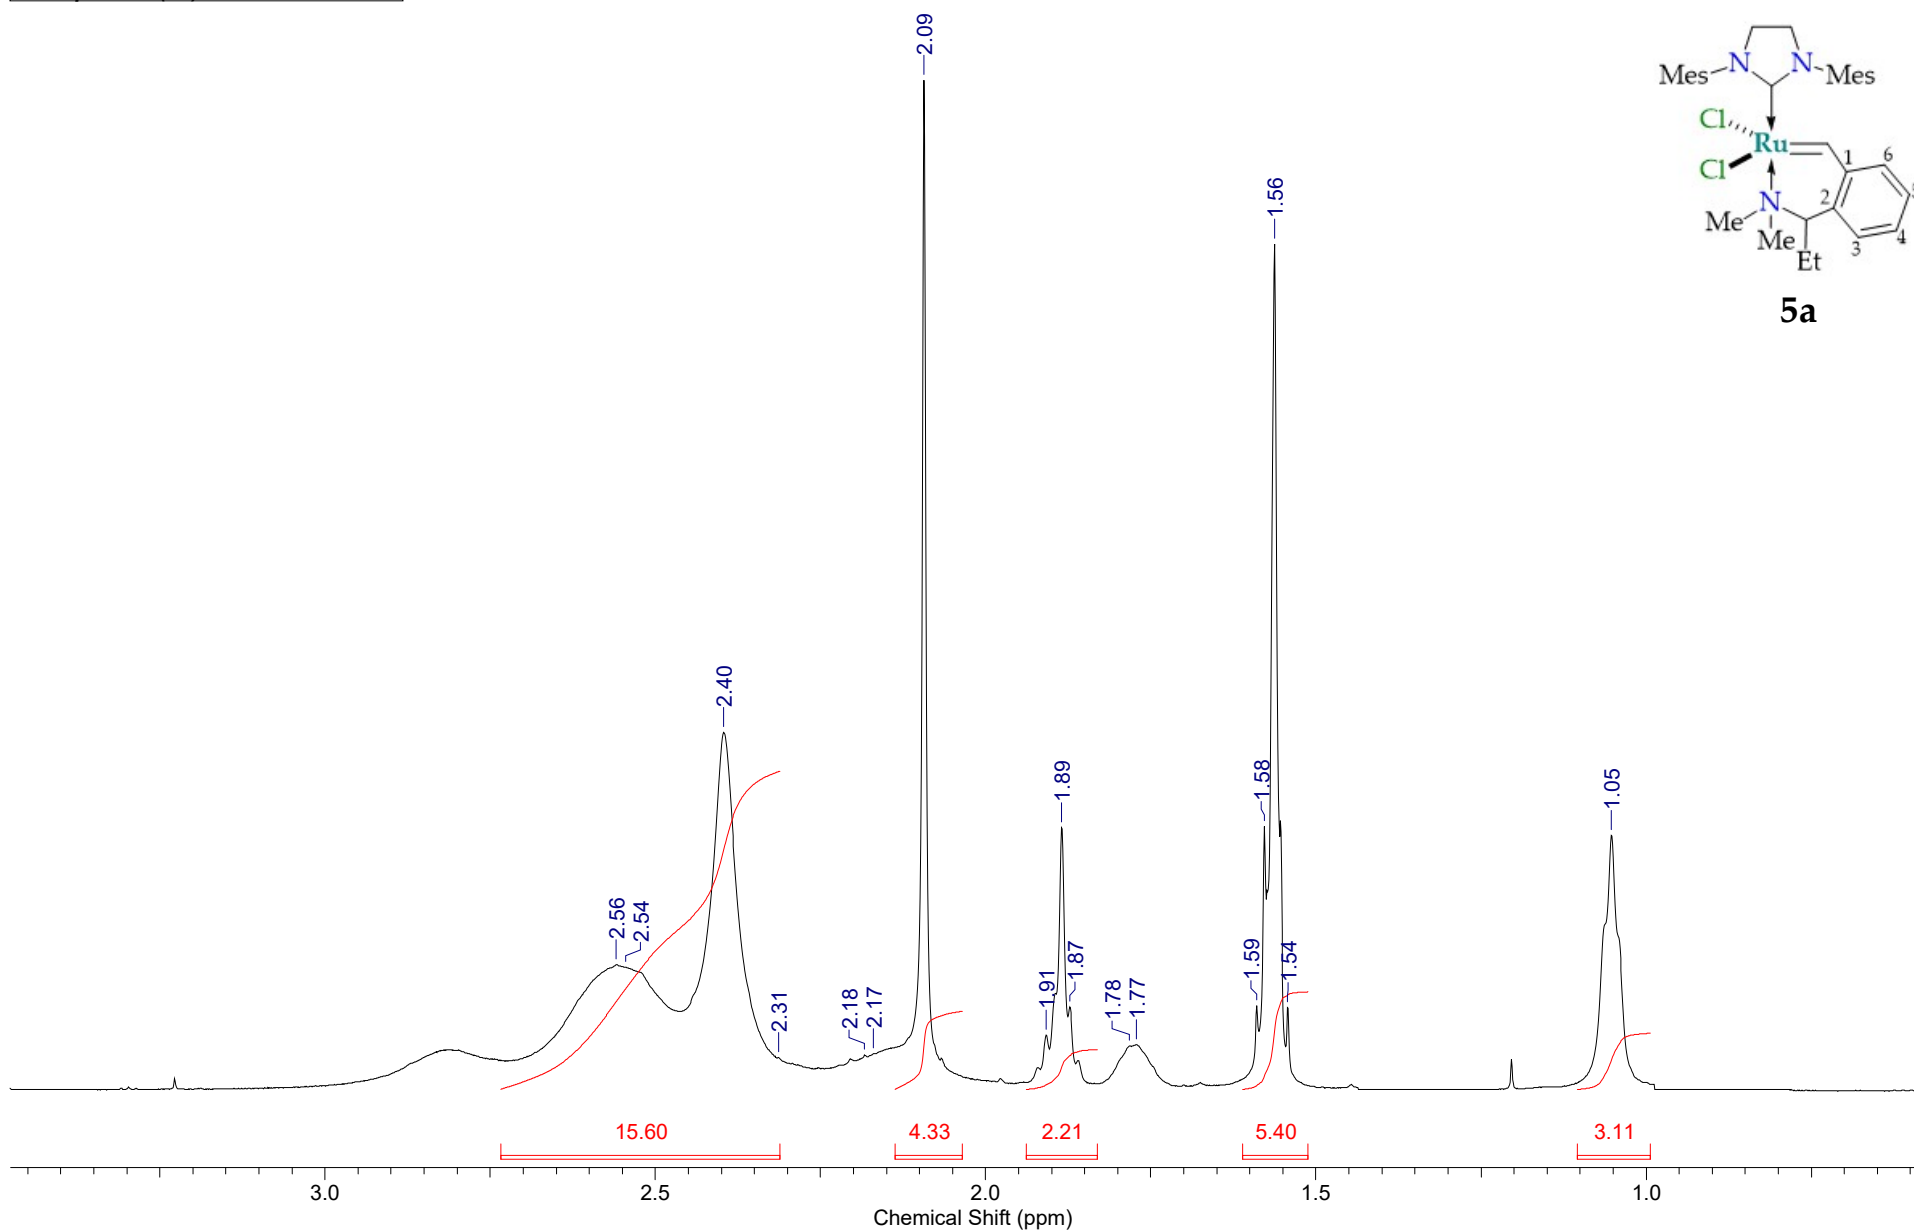

# $^{13}\text{C}$ spectrum of compound 5a

|                                 |  |                                          |  |                                 |  |
|---------------------------------|--|------------------------------------------|--|---------------------------------|--|
| Acquisition Time (sec) 0.9647   |  | Comment single pulse decoupled gated NOE |  | Date 24 Jan 2023 00:44:55       |  |
| Date Stamp 23 Jan 2023 17:54:48 |  | File Name                                |  |                                 |  |
| Frequency (MHz) 150.91          |  | Nucleus 13C                              |  | Number of Transients 4000       |  |
| Original Points Count 65536     |  | Owner CKP                                |  | Points Count 65536              |  |
| Receiver Gain 58.00             |  | Solvent CHLOROFORM-d                     |  | Pulse Sequence single_pulse_dec |  |
| Sweep Width (Hz) 67934.78       |  | Spectrum Offset (Hz) 25655.2832          |  |                                 |  |

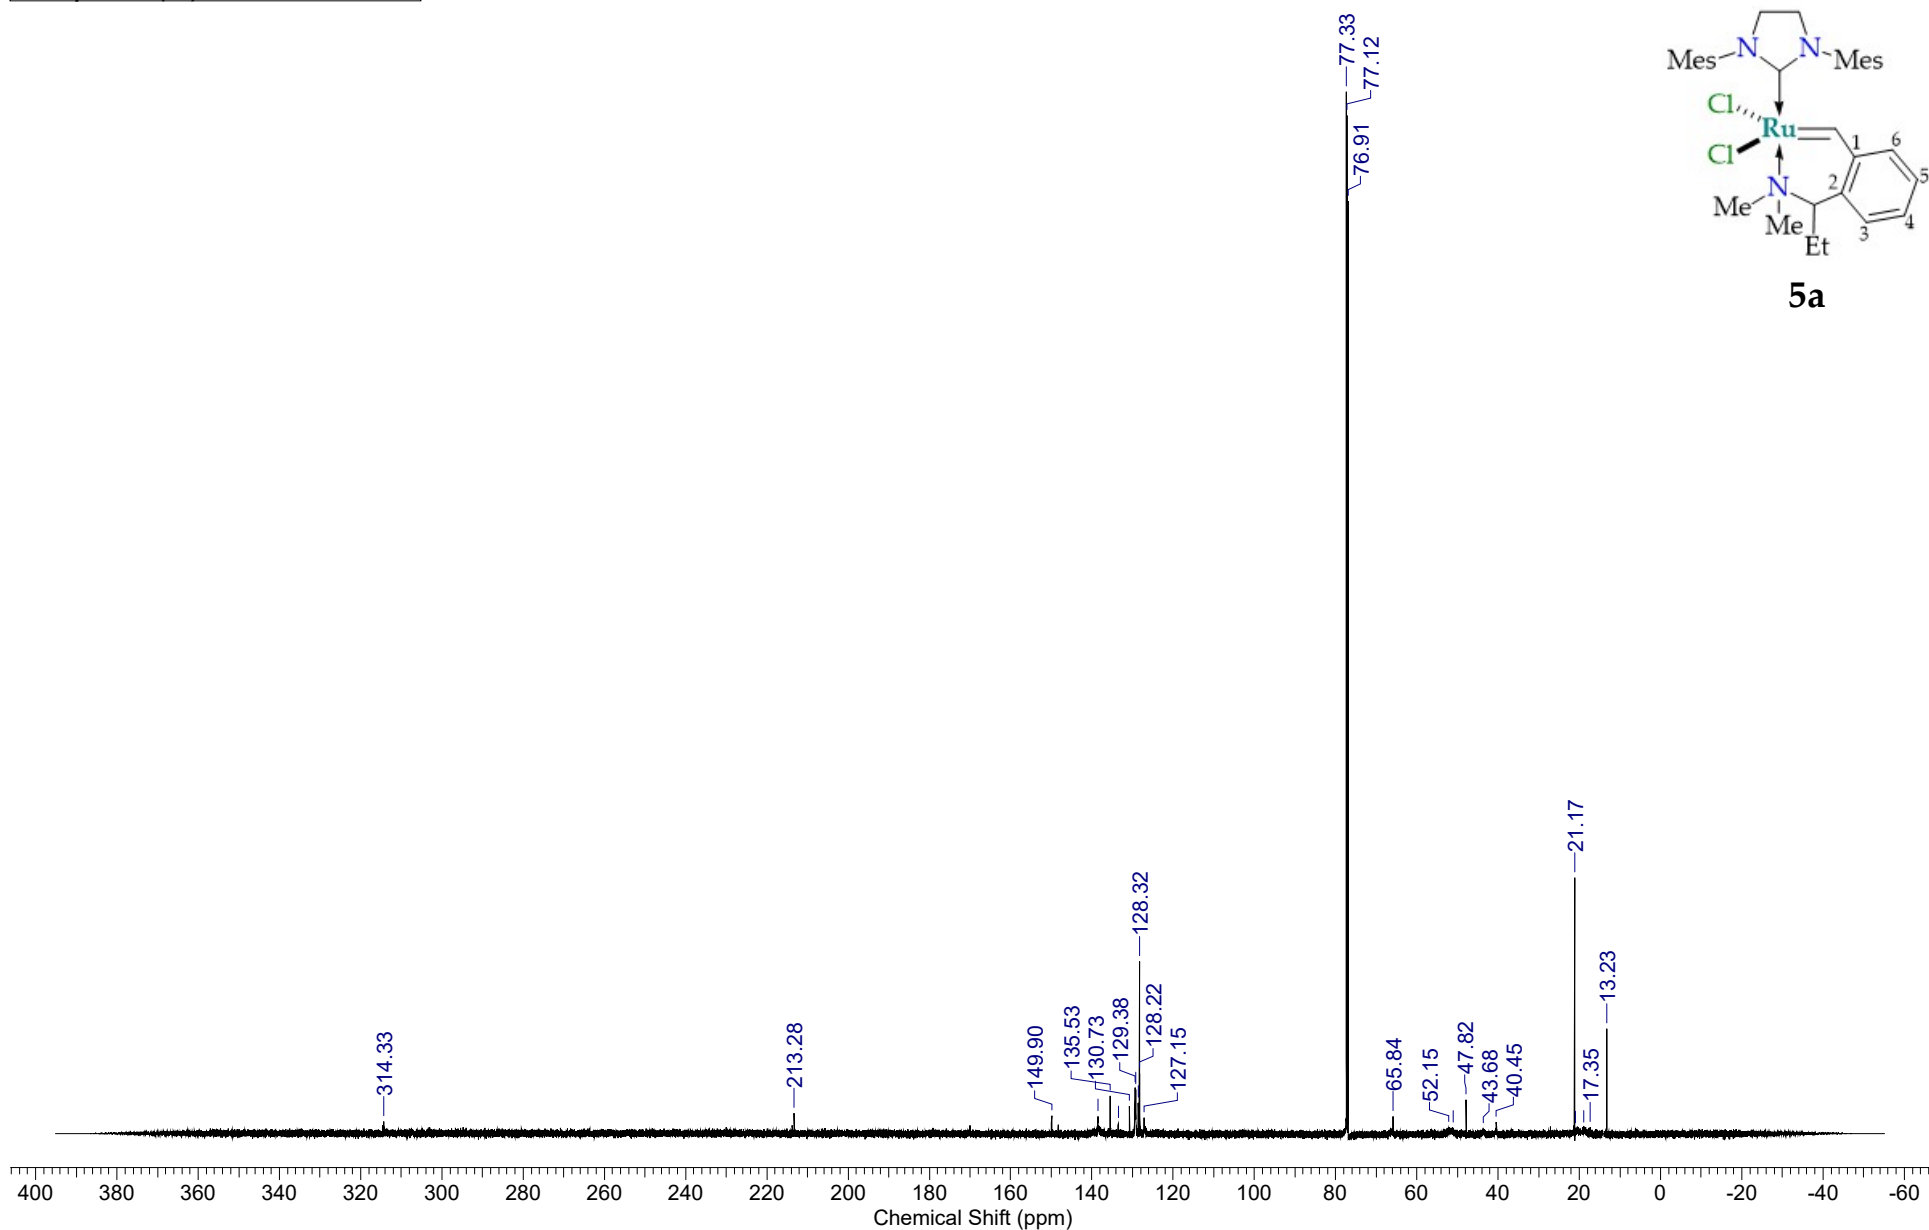

# $^{13}\text{C}$ spectrum of compound 5a

|                                        |                                                 |                                        |
|----------------------------------------|-------------------------------------------------|----------------------------------------|
| <b>Acquisition Time (sec)</b> 0.9647   | <b>Comment</b> single pulse decoupled gated NOE | <b>Date</b> 24 Jan 2023 00:44:55       |
| <b>Date Stamp</b> 23 Jan 2023 17:54:48 | <b>File Name</b>                                |                                        |
| <b>Frequency (MHz)</b> 150.91          | <b>Nucleus</b> $^{13}\text{C}$                  | <b>Number of Transients</b> 4000       |
| <b>Original Points Count</b> 65536     | <b>Owner</b> CKP                                | <b>Points Count</b> 65536              |
| <b>Receiver Gain</b> 58.00             | <b>Solvent</b> CHLOROFORM-d                     | <b>Pulse Sequence</b> single pulse dec |
| <b>Sweep Width (Hz)</b> 67934.78       |                                                 | <b>Spectrum Offset (Hz)</b> 25655.2832 |

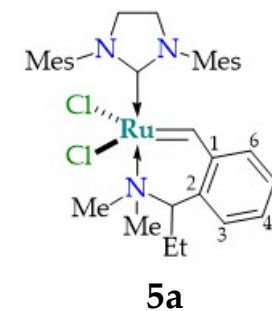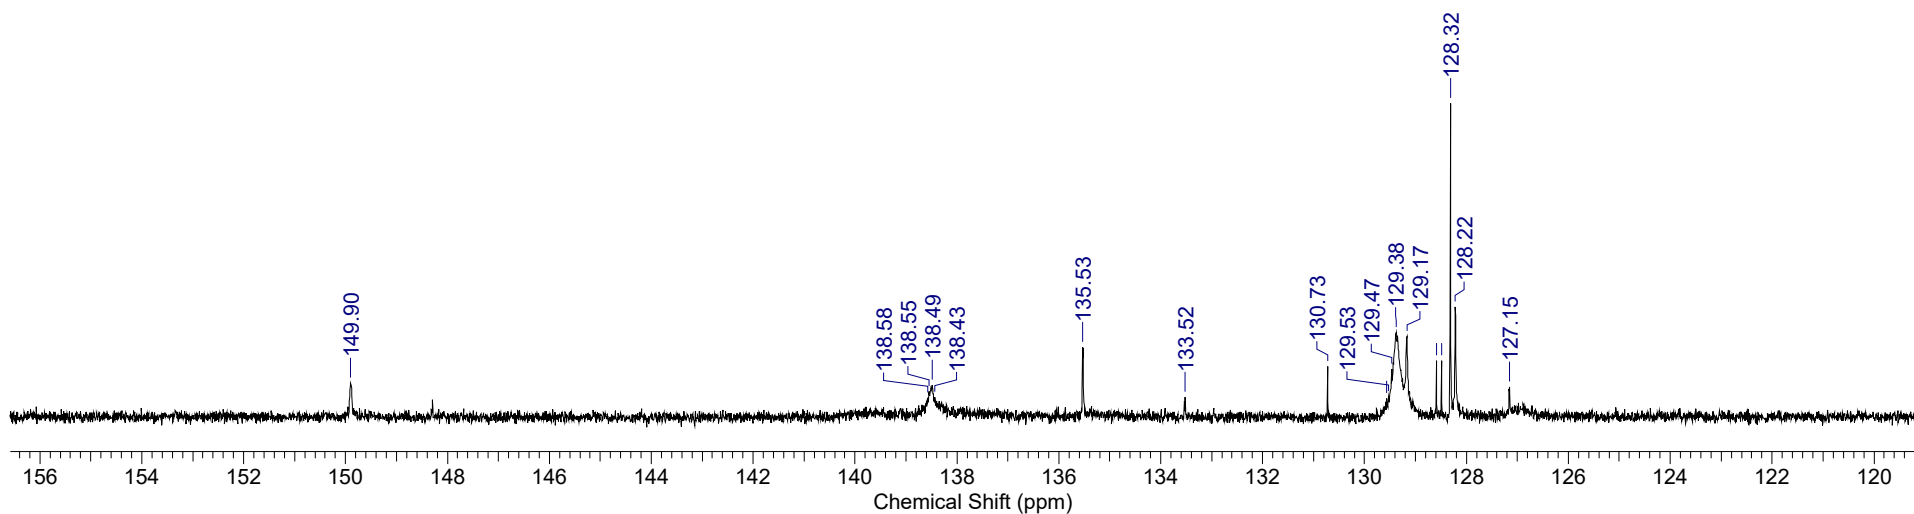

# $^{13}\text{C}$ spectrum of compound 5a

|                                 |  |                                          |  |                                 |  |
|---------------------------------|--|------------------------------------------|--|---------------------------------|--|
| Acquisition Time (sec) 0.9647   |  | Comment single pulse decoupled gated NOE |  | Date 24 Jan 2023 00:44:55       |  |
| Date Stamp 23 Jan 2023 17:54:48 |  | File Name                                |  |                                 |  |
| Frequency (MHz) 150.91          |  | Nucleus 13C                              |  | Number of Transients 4000       |  |
| Original Points Count 65536     |  | Owner CKP                                |  | Points Count 65536              |  |
| Receiver Gain 58.00             |  | Solvent CHLOROFORM-d                     |  | Pulse Sequence single_pulse_dec |  |
| Sweep Width (Hz) 67934.78       |  | Spectrum Offset (Hz) 25655.2832          |  |                                 |  |

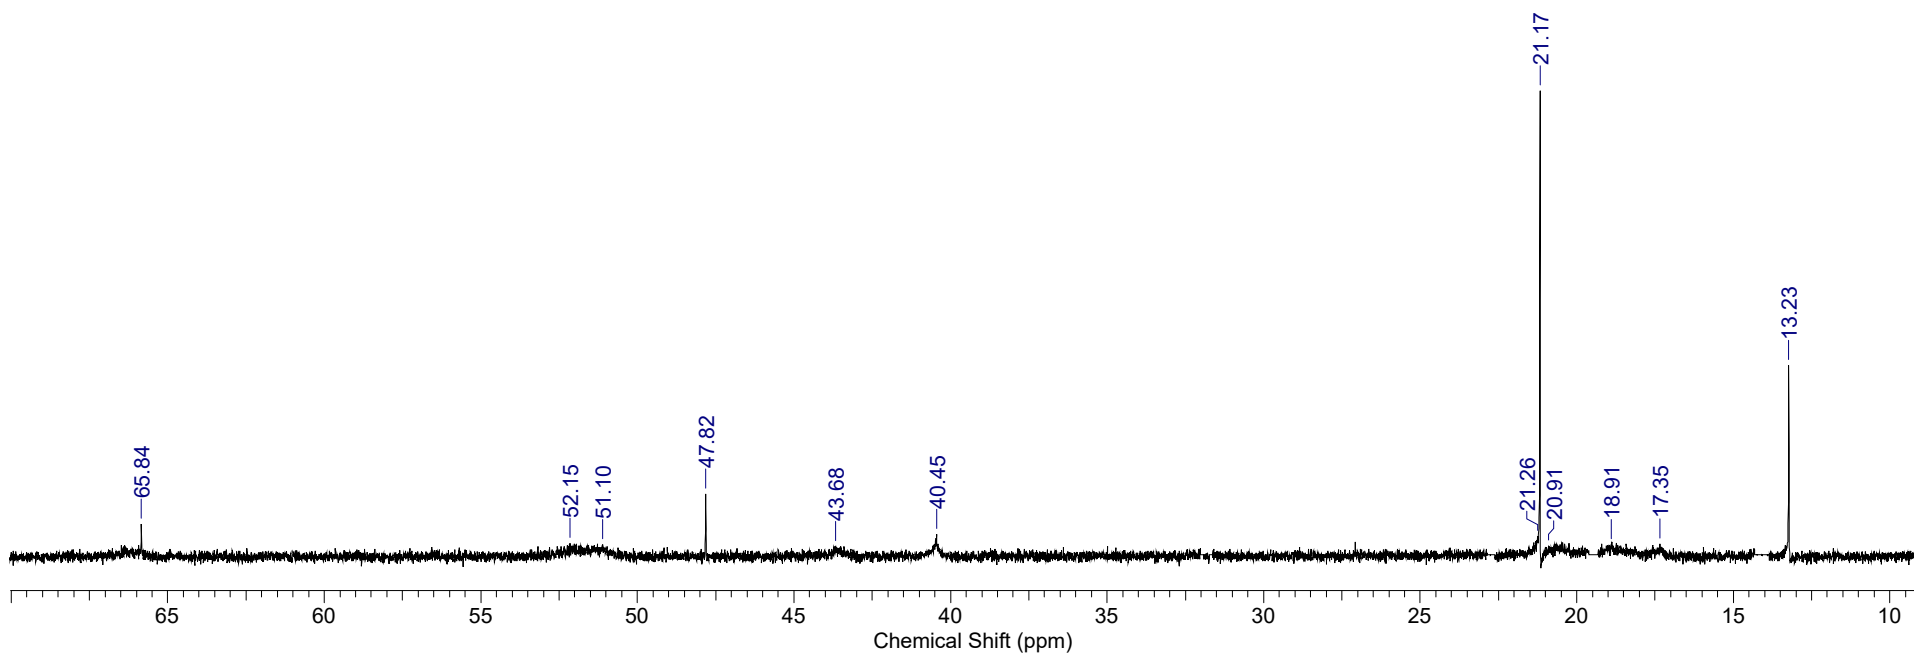

# IR spectrum of compound 5a

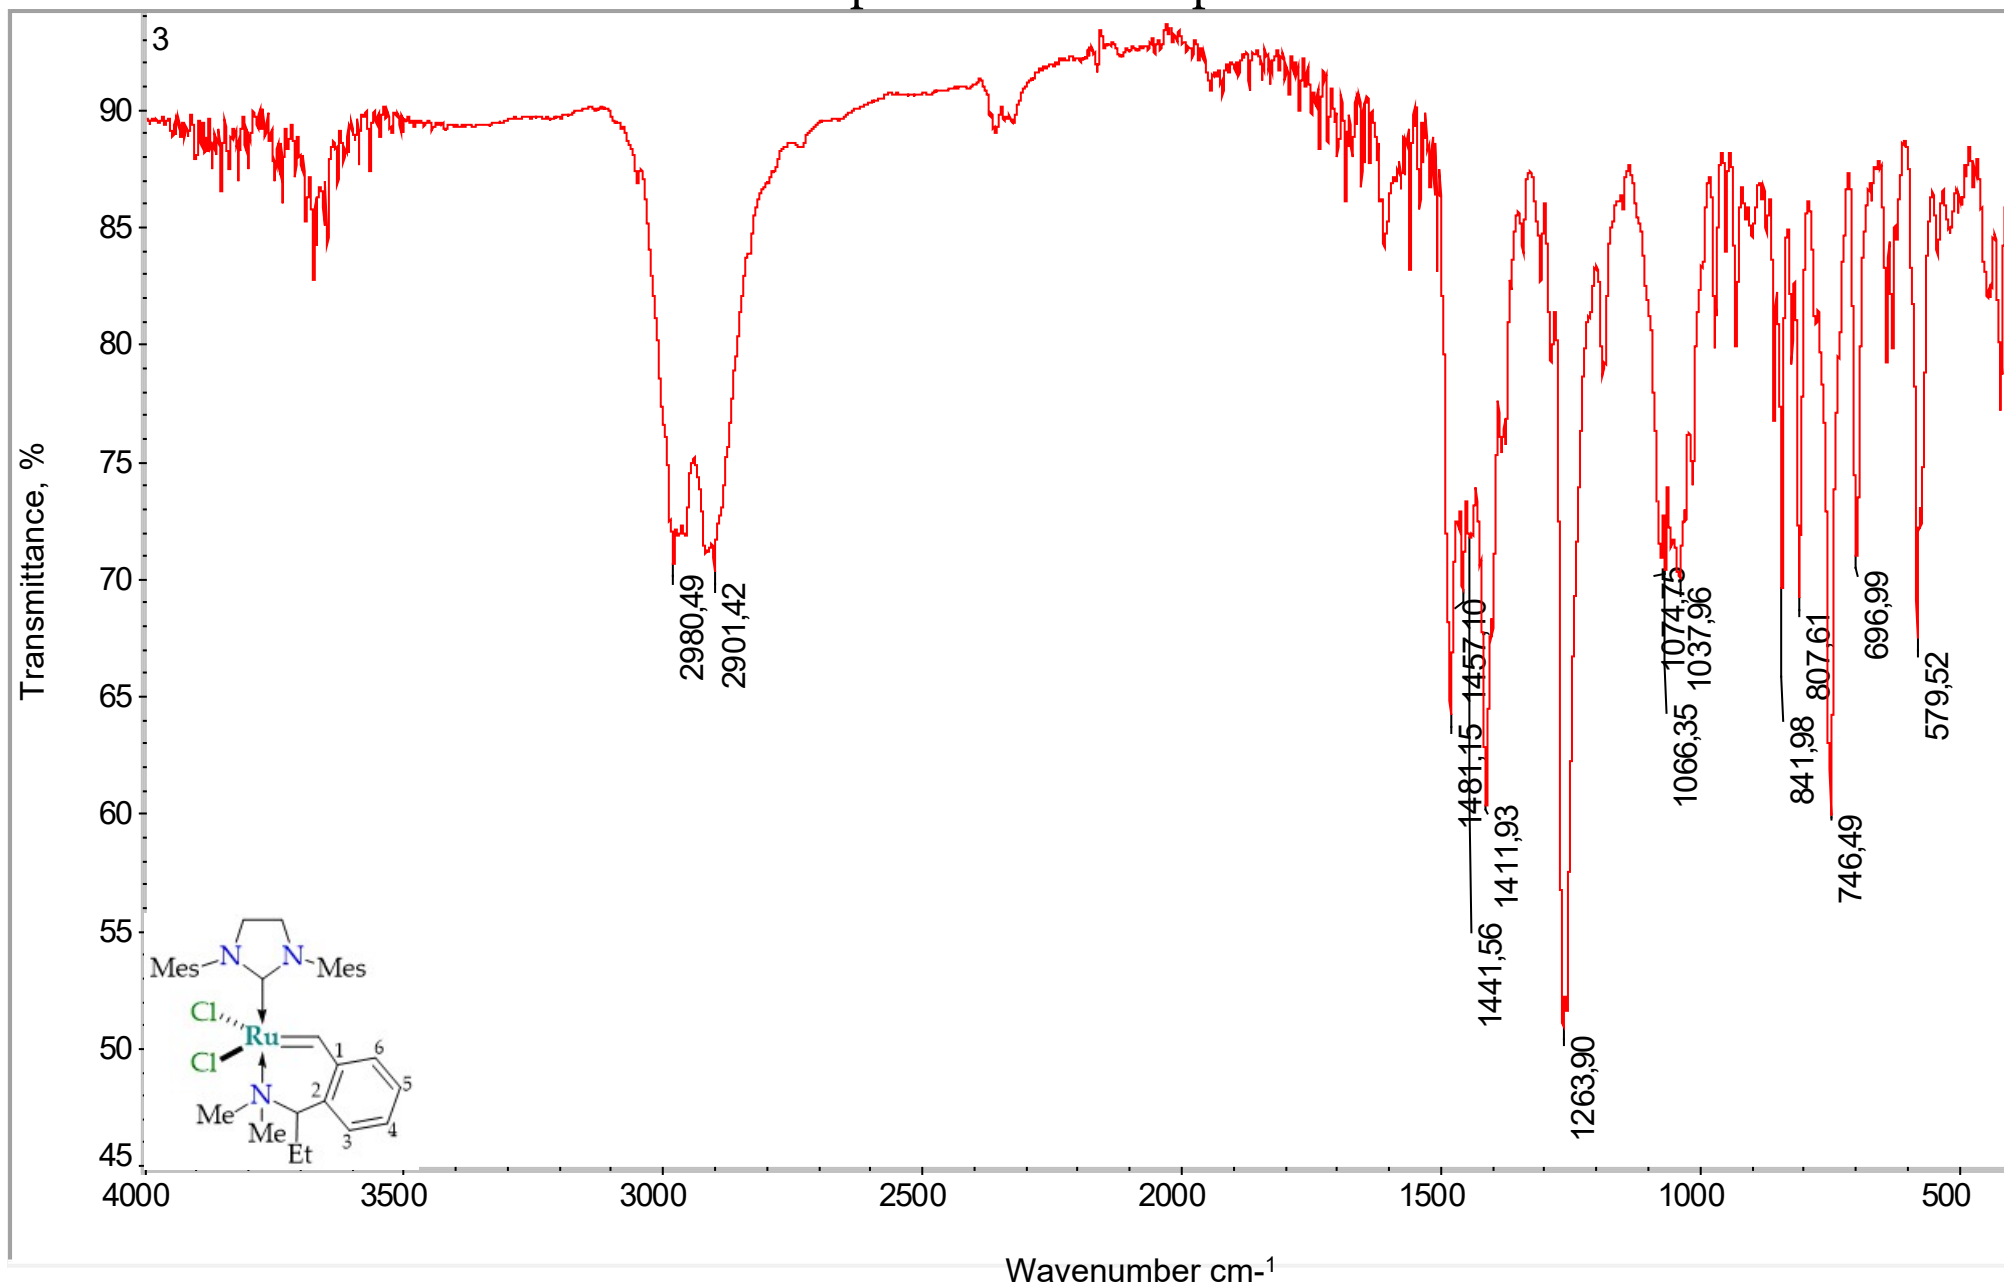



# $^1\text{H}$ spectrum of compound **5b**

|                        |                      |           |              |                      |                      |
|------------------------|----------------------|-----------|--------------|----------------------|----------------------|
| Acquisition Time (sec) | 1.7459               | Comment   | single pulse | Date                 | 23 Jan 2023 11:57:29 |
| Date Stamp             | 23 Jan 2023 10:55:06 | File Name |              |                      |                      |
| Frequency (MHz)        | 600.17               | Nucleus   | $^1\text{H}$ | Number of Transients | 16                   |
| Original Points Count  | 32768                | Owner     | CKP          | Points Count         | 32768                |
| Receiver Gain          | 34.00                | Solvent   | CHLOROFORM-d | Pulse Sequence       | single_pulse.ex2     |
| Sweep Width (Hz)       | 18768.77             |           |              | Spectrum Offset (Hz) | 6614.6226            |

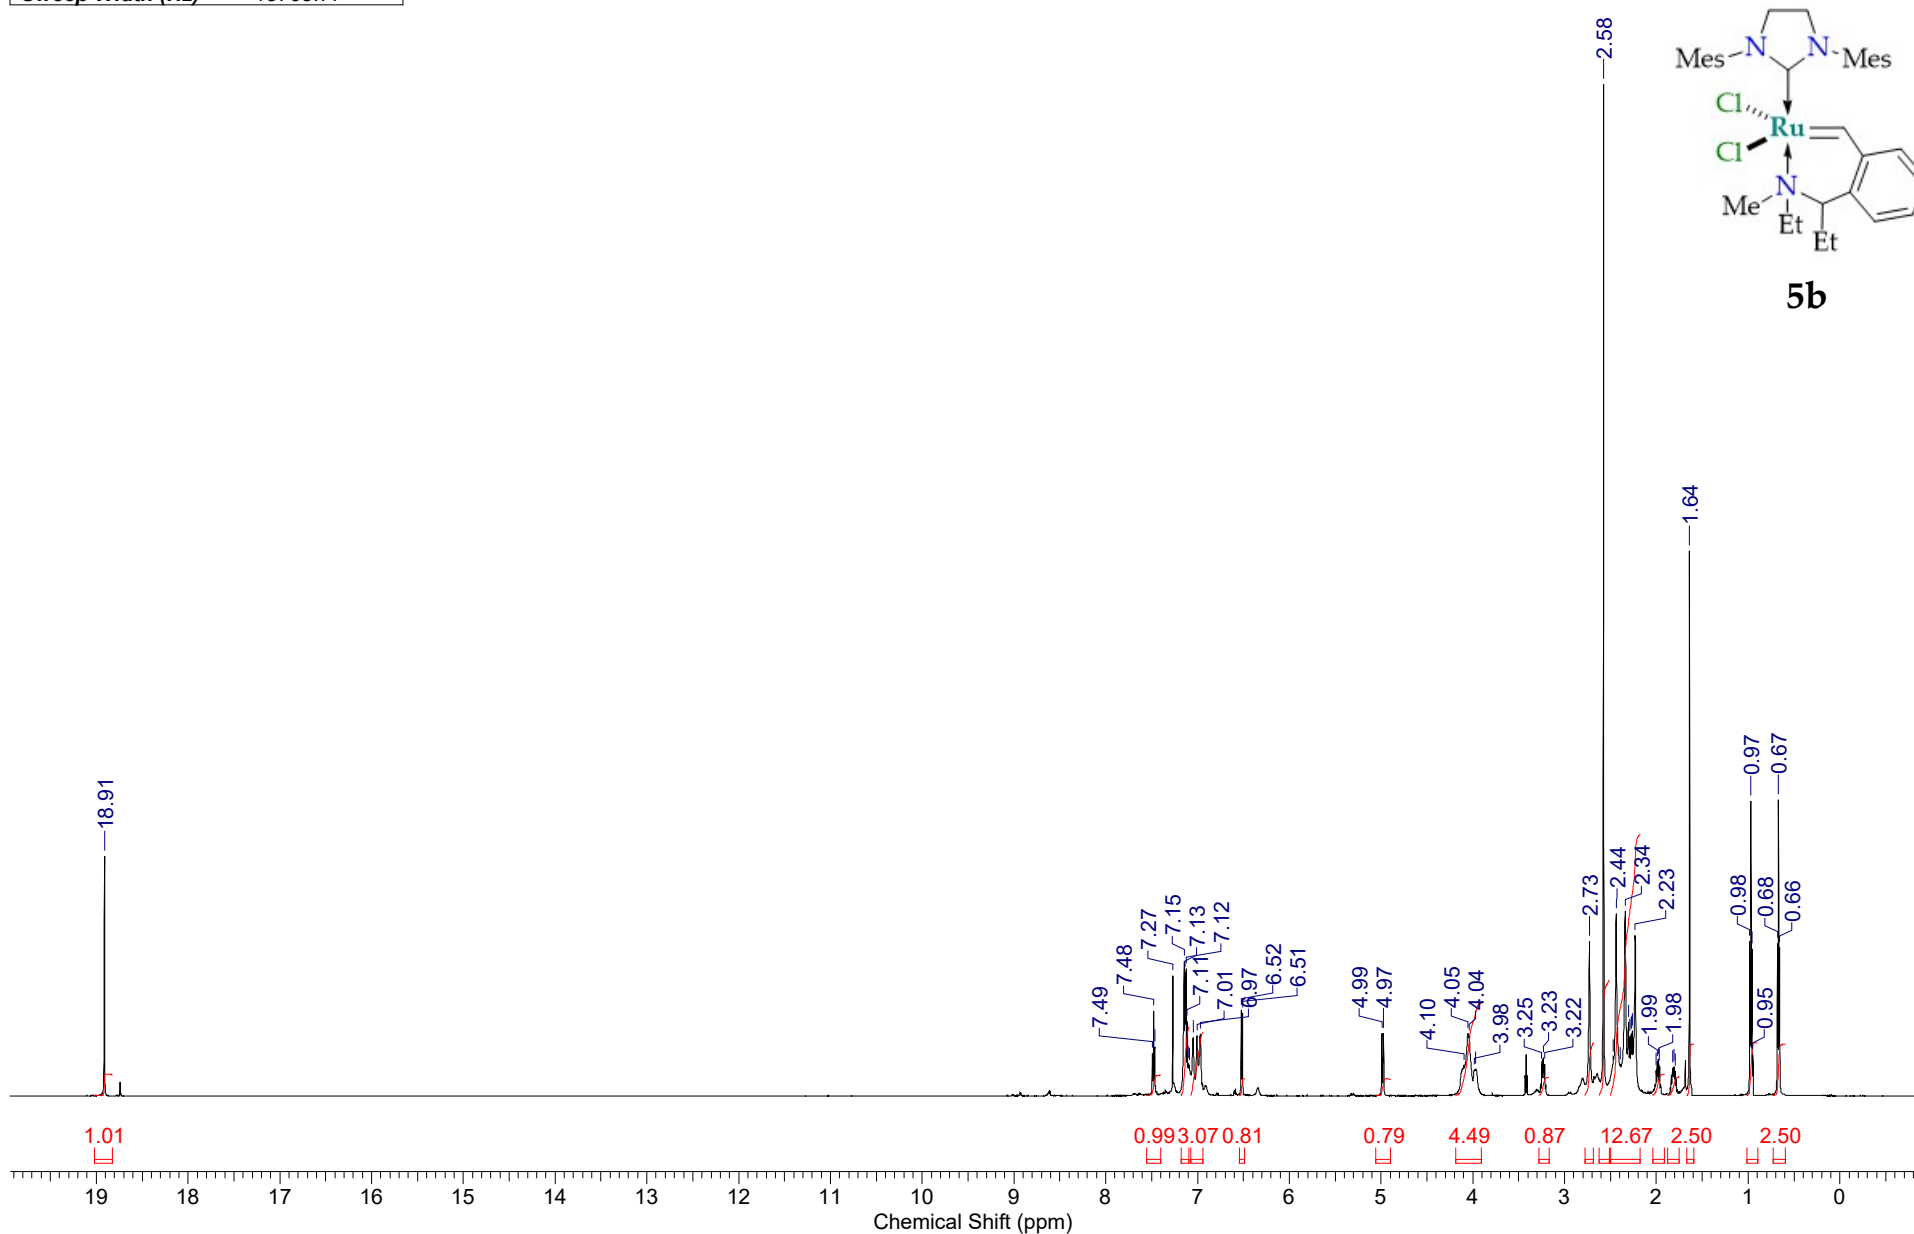

# $^1\text{H}$ spectrum of compound **5b**

|                        |                      |           |              |                      |                      |
|------------------------|----------------------|-----------|--------------|----------------------|----------------------|
| Acquisition Time (sec) | 1.7459               | Comment   | single pulse | Date                 | 23 Jan 2023 11:57:29 |
| Date Stamp             | 23 Jan 2023 10:55:06 | File Name |              |                      |                      |
| Frequency (MHz)        | 600.17               | Nucleus   | $^1\text{H}$ | Number of Transients | 16                   |
| Original Points Count  | 32768                | Owner     | CKP          | Points Count         | 32768                |
| Receiver Gain          | 34.00                | Solvent   | CHLOROFORM-d | Pulse Sequence       | single_pulse.ex2     |
| Sweep Width (Hz)       | 18768.77             |           |              | Spectrum Offset (Hz) | 6614.6226            |

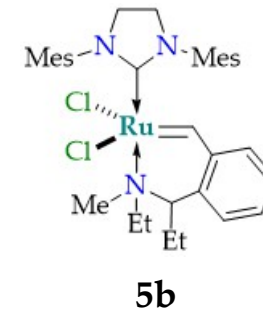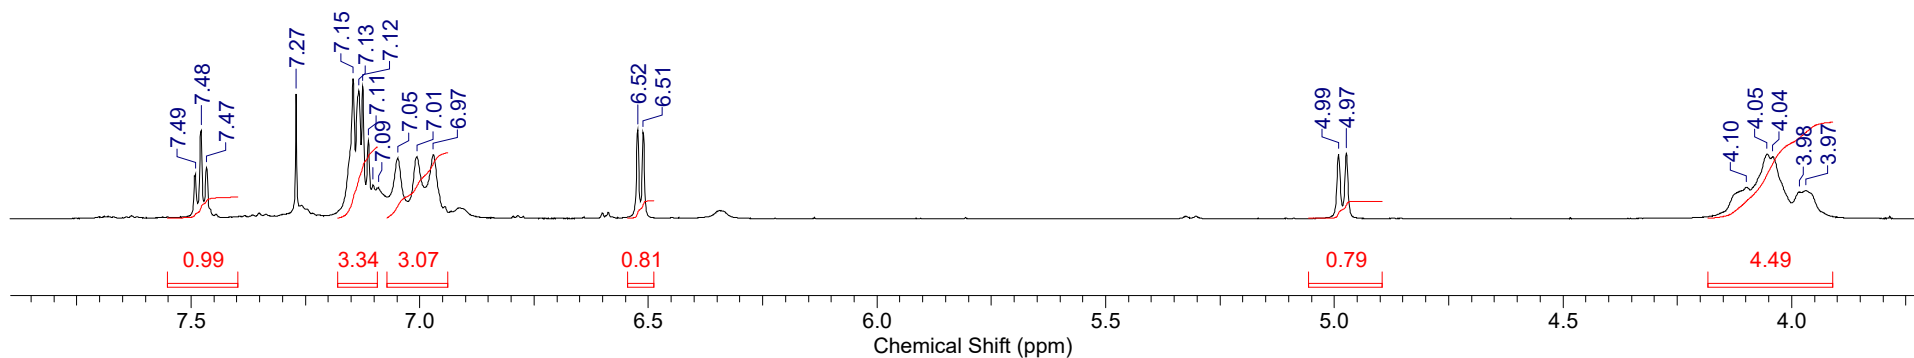

# $^1\text{H}$ spectrum of compound **5b**

|                        |                      |           |              |                      |                      |
|------------------------|----------------------|-----------|--------------|----------------------|----------------------|
| Acquisition Time (sec) | 1.7459               | Comment   | single pulse | Date                 | 23 Jan 2023 11:57:29 |
| Date Stamp             | 23 Jan 2023 10:55:06 | File Name |              |                      |                      |
| Frequency (MHz)        | 600.17               | Nucleus   | $^1\text{H}$ | Number of Transients | 16                   |
| Original Points Count  | 32768                | Owner     | CKP          | Points Count         | 32768                |
| Receiver Gain          | 34.00                | Solvent   | CHLOROFORM-d | Pulse Sequence       | single_pulse.ex2     |
| Sweep Width (Hz)       | 18768.77             |           |              | Spectrum Offset (Hz) | 6614.6226            |

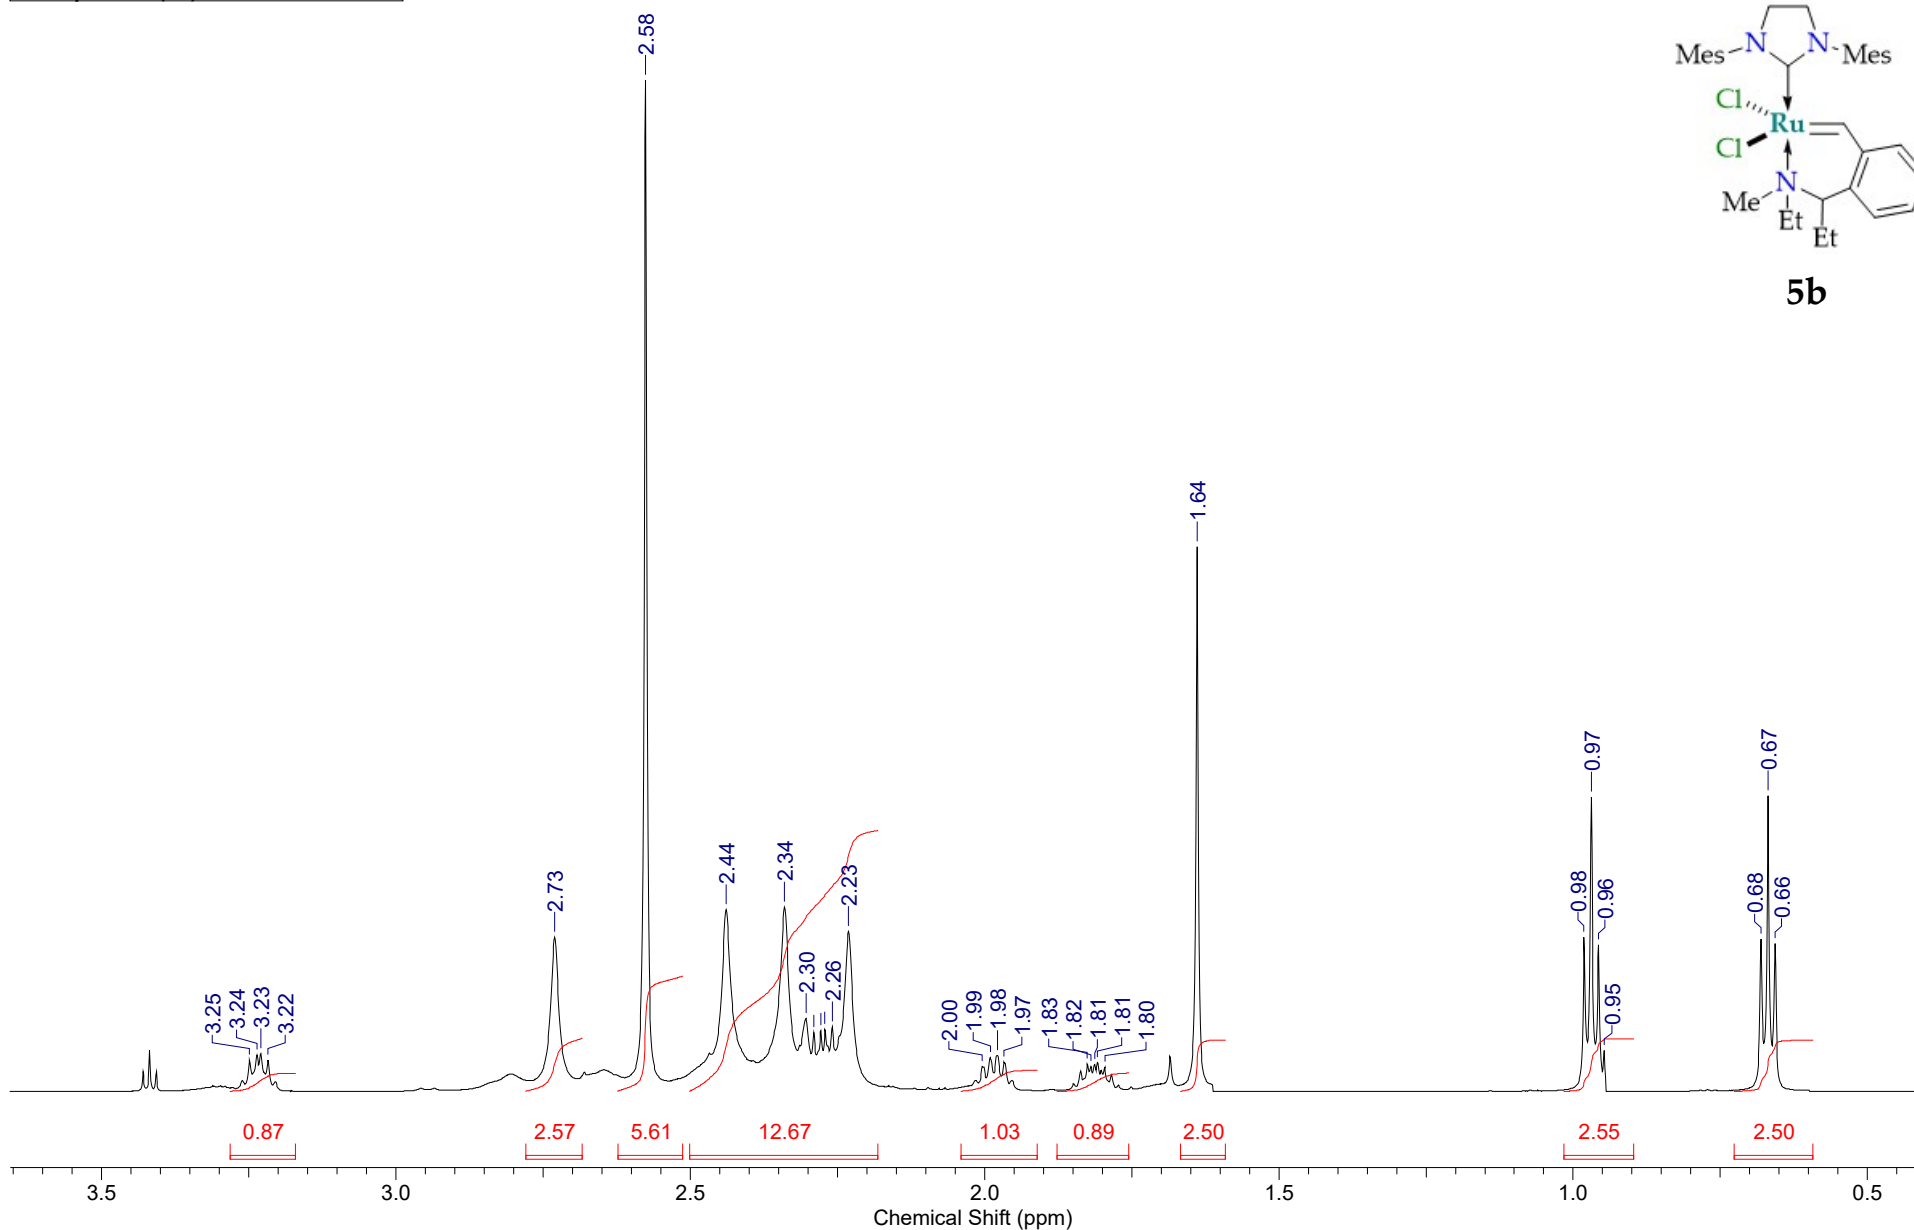

# $^{13}\text{C}$ spectrum of compound 5b

|                        |                      |           |                                  |                      |                      |
|------------------------|----------------------|-----------|----------------------------------|----------------------|----------------------|
| Acquisition Time (sec) | 0.9647               | Comment   | single pulse decoupled gated NOE | Date                 | 23 Jan 2023 13:37:35 |
| Date Stamp             | 23 Jan 2023 12:35:13 | File Name |                                  |                      |                      |
| Frequency (MHz)        | 150.91               | Nucleus   | $^{13}\text{C}$                  | Number of Transients | 4000                 |
| Original Points Count  | 65536                | Owner     | CKP                              | Points Count         | 65536                |
| Receiver Gain          | 56.00                | Solvent   | CHLOROFORM-d                     | Pulse Sequence       | single pulse dec     |
| Sweep Width (Hz)       | 67934.78             |           |                                  | Spectrum Offset (Hz) | 25629.7129           |

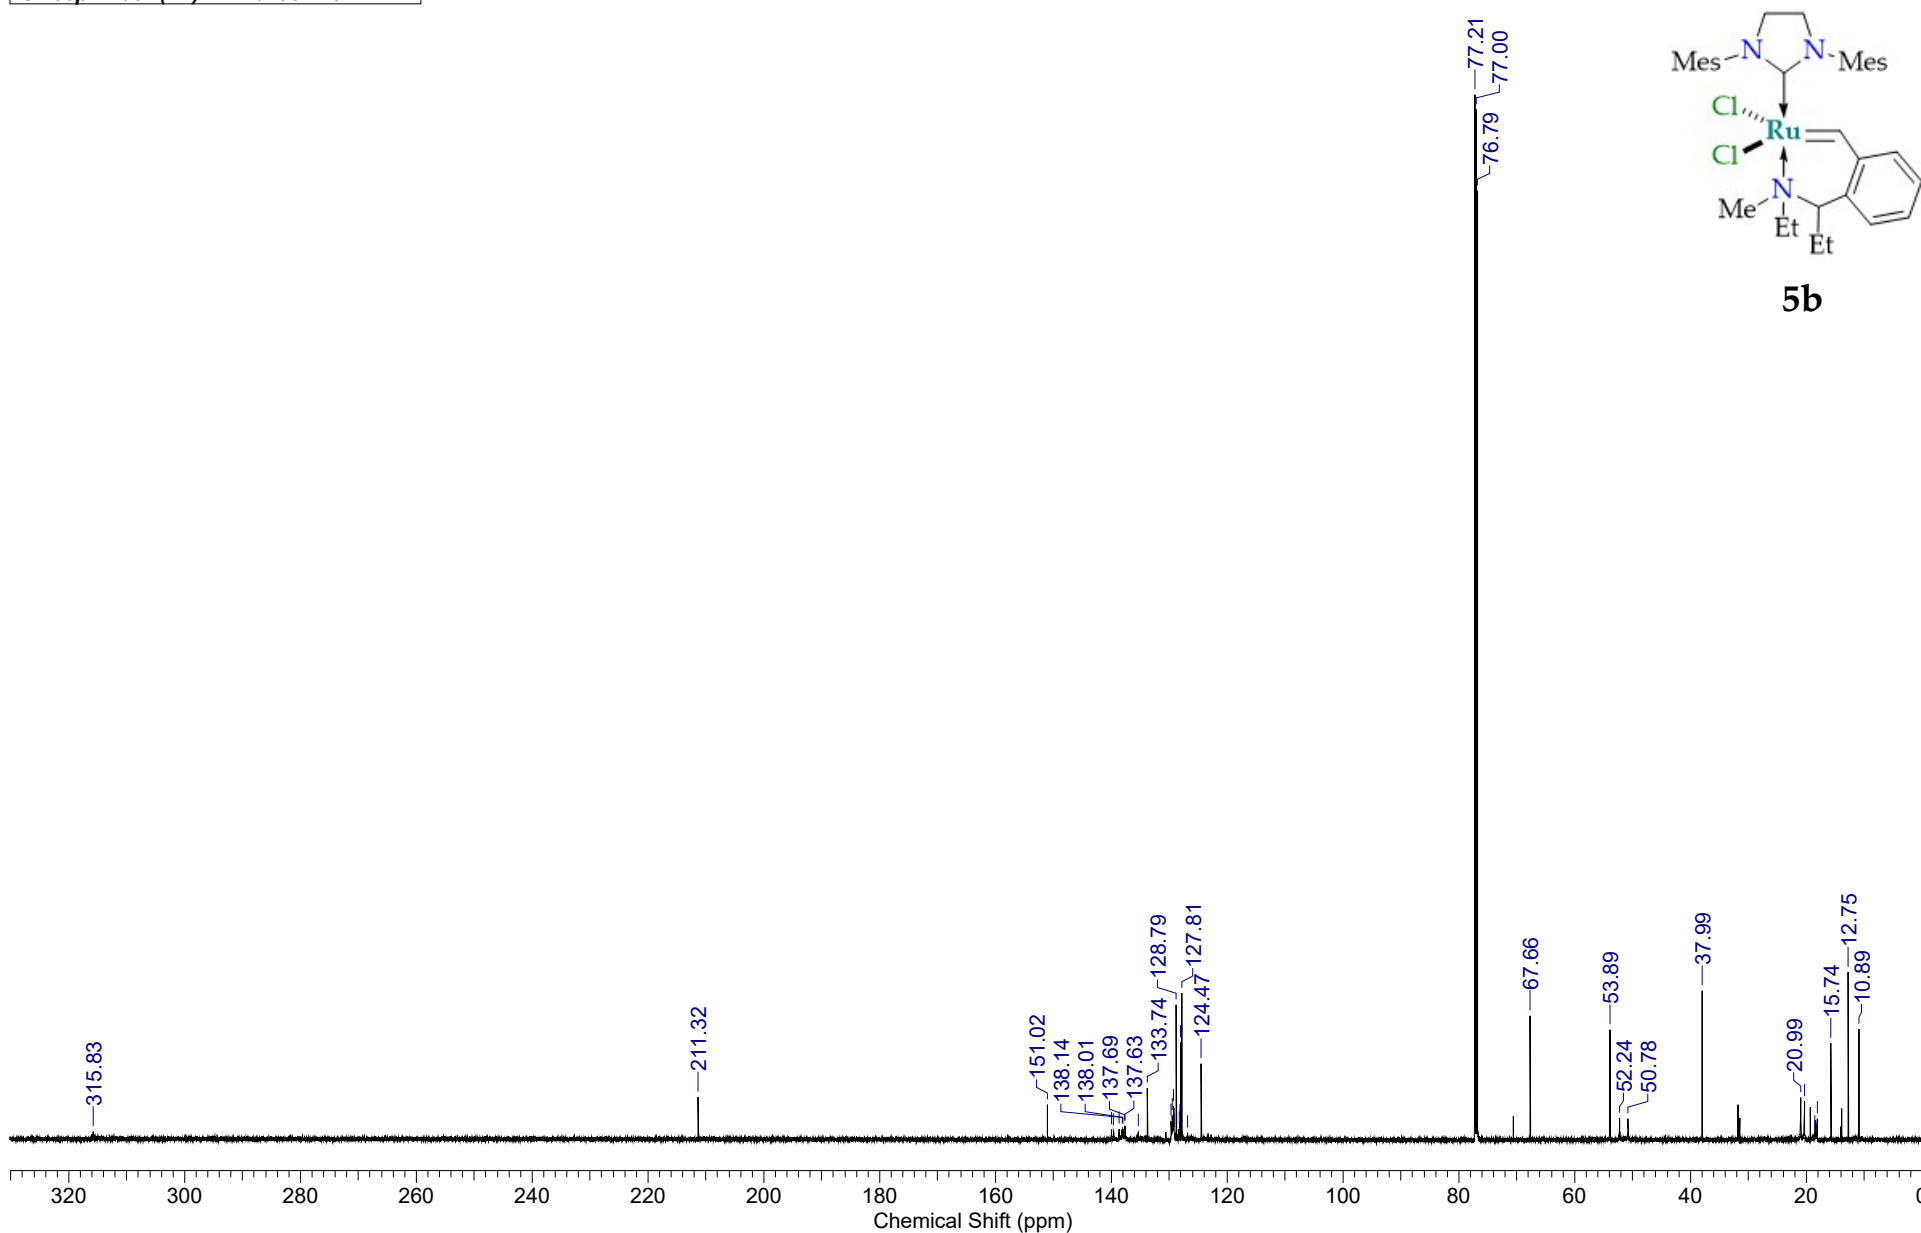

# $^{13}\text{C}$ spectrum of compound **5b**

|                                        |                                                 |                                        |
|----------------------------------------|-------------------------------------------------|----------------------------------------|
| <b>Acquisition Time (sec)</b> 0.9647   | <b>Comment</b> single pulse decoupled gated NOE | <b>Date</b> 23 Jan 2023 13:37:35       |
| <b>Date Stamp</b> 23 Jan 2023 12:35:13 | <b>File Name</b>                                |                                        |
| <b>Frequency (MHz)</b> 150.91          | <b>Nucleus</b> $^{13}\text{C}$                  | <b>Number of Transients</b> 4000       |
| <b>Original Points Count</b> 65536     | <b>Owner</b> CKP                                | <b>Points Count</b> 65536              |
| <b>Receiver Gain</b> 56.00             | <b>Solvent</b> CHLOROFORM-d                     | <b>Pulse Sequence</b> single pulse dec |
| <b>Sweep Width (Hz)</b> 67934.78       | <b>Spectrum Offset (Hz)</b> 25629.7129          |                                        |

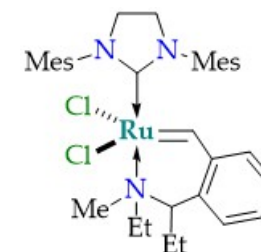

**5b**

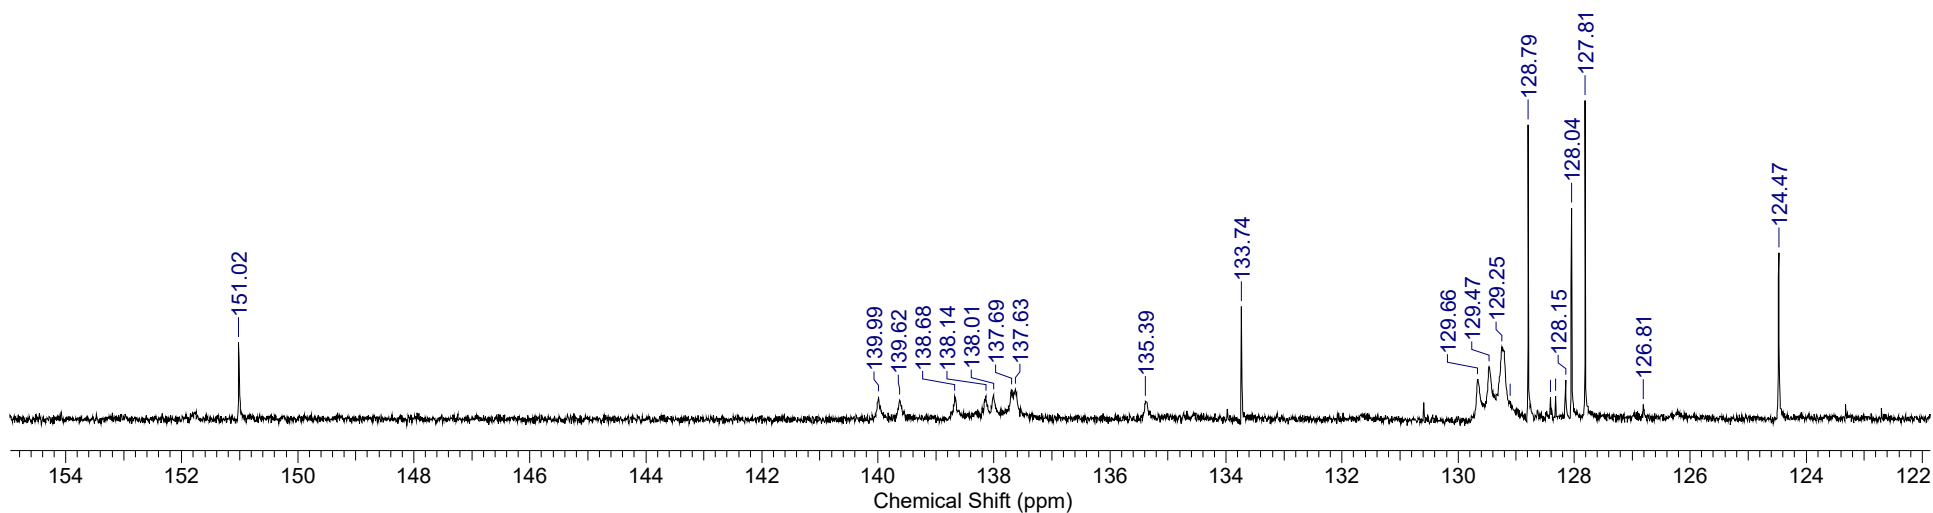

# $^{13}\text{C}$ spectrum of compound **5b**

|                                        |                             |                                                 |                                        |  |
|----------------------------------------|-----------------------------|-------------------------------------------------|----------------------------------------|--|
| <b>Acquisition Time (sec)</b> 0.9647   |                             | <b>Comment</b> single pulse decoupled gated NOE | <b>Date</b> 23 Jan 2023 13:37:35       |  |
| <b>Date Stamp</b> 23 Jan 2023 12:35:13 |                             | <b>File Name</b>                                |                                        |  |
| <b>Frequency (MHz)</b> 150.91          | <b>Nucleus</b> 13C          | <b>Number of Transients</b> 4000                | <b>Origin</b> ECA 600                  |  |
| <b>Original Points Count</b> 65536     | <b>Owner</b> CKP            | <b>Points Count</b> 65536                       | <b>Pulse Sequence</b> single_pulse_dec |  |
| <b>Receiver Gain</b> 56.00             | <b>Solvent</b> CHLOROFORM-d | <b>Spectrum Offset (Hz)</b> 25629.7129          |                                        |  |
| <b>Sweep Width (Hz)</b> 67934.78       |                             |                                                 |                                        |  |

FZ1491-2.JDF



**5b**

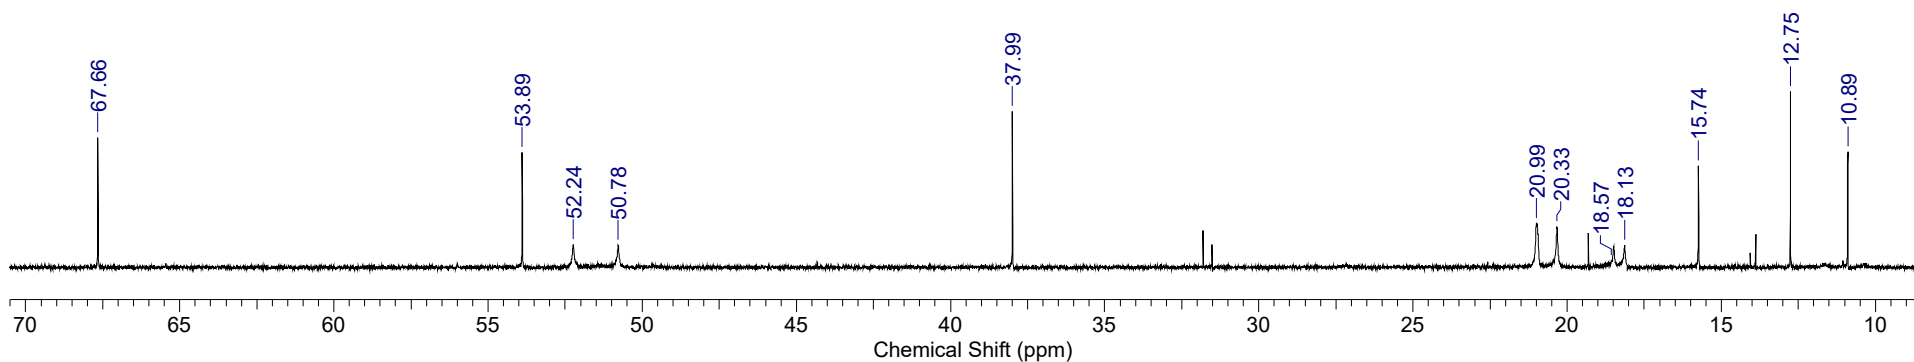

# IR spectrum of compound 5b

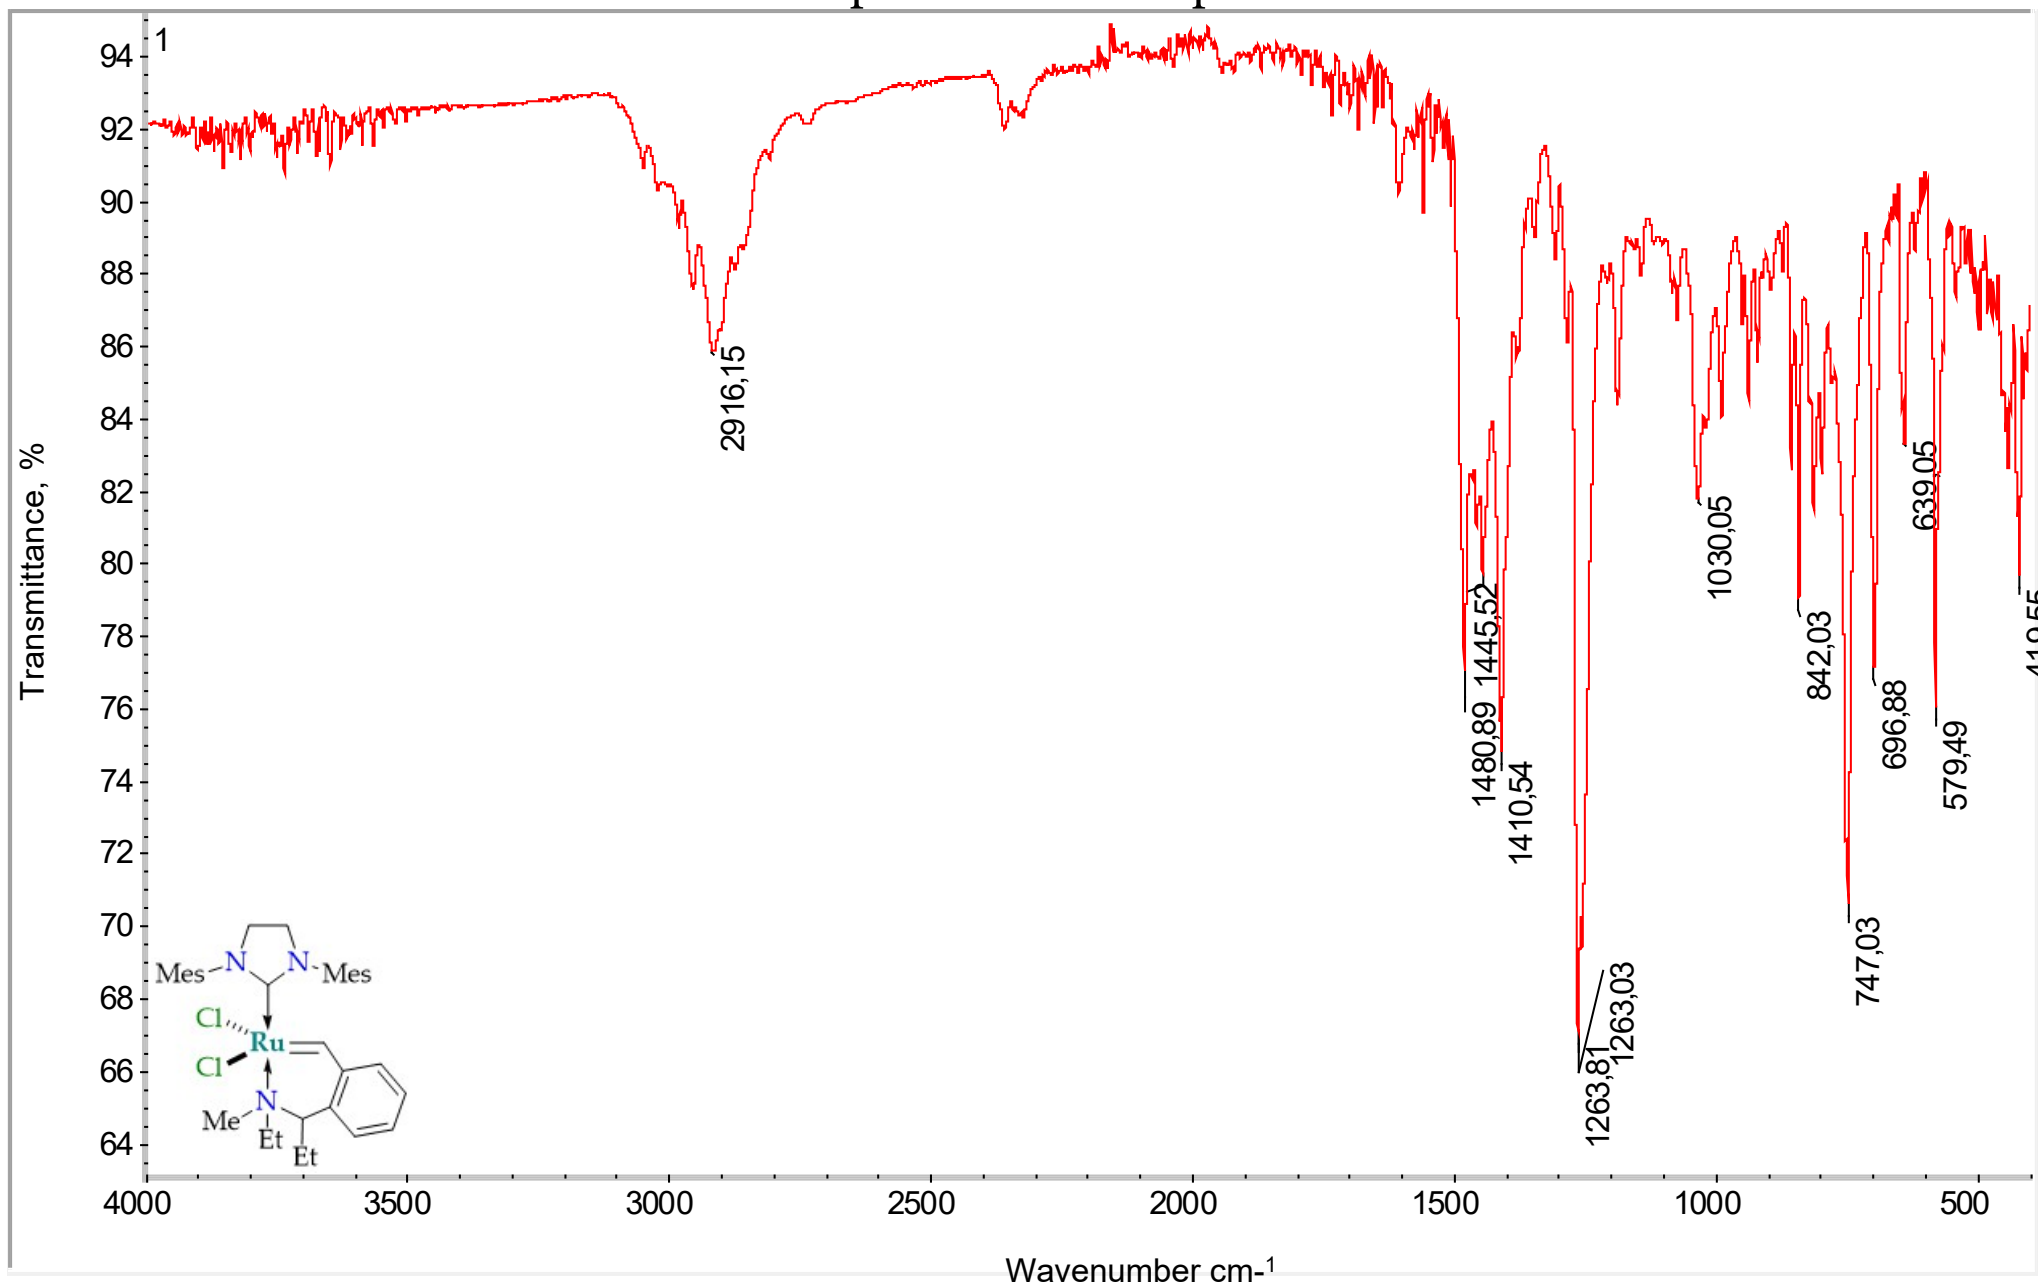

# $^1\text{H}$ spectrum of compound 5c

|                        |        |         |              |                      |                  |
|------------------------|--------|---------|--------------|----------------------|------------------|
| Acquisition Time (sec) | 1.9818 | Comment | single pulse | Date                 |                  |
| Date Stamp             |        |         |              |                      |                  |
| Frequency (MHz)        | 600.17 | Nucleus | $^1\text{H}$ | Number of Transients | 8                |
| Original Points Count  | 32768  | Owner   | CKP          | Points Count         | 32768            |
| Receiver Gain          | 42.00  | Solvent | CHLOROFORM-d | Spectrum Offset (Hz) | 5364.2036        |
|                        |        |         |              | Origin               | ECA 600          |
|                        |        |         |              | Pulse Sequence       | single_pulse.ex2 |
|                        |        |         |              | Sweep Width (Hz)     | 16534.39         |

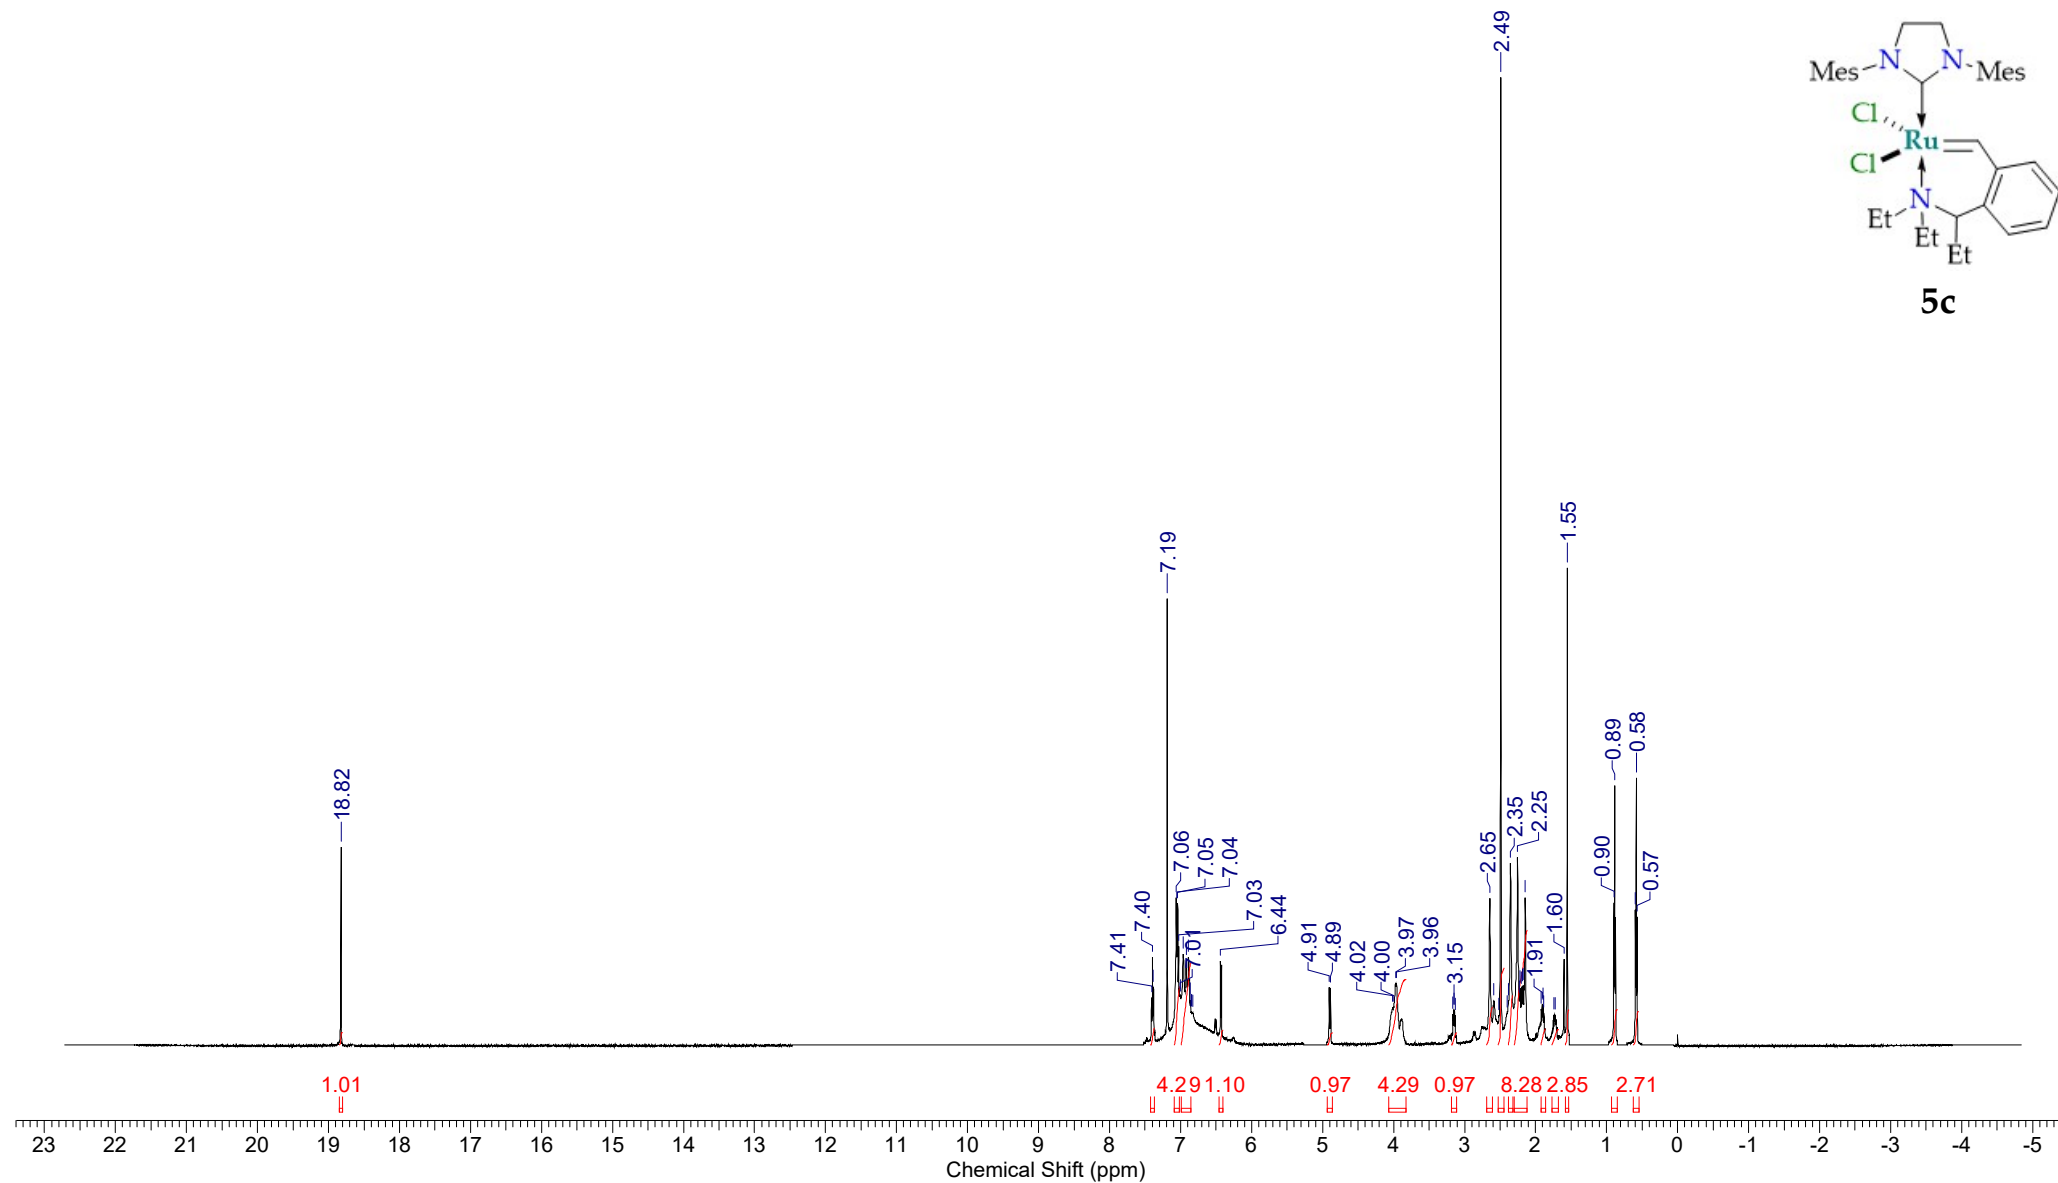



# $^{13}\text{C}$ spectrum of compound 5c

|                        |        |         |                                  |                      |            |                  |                  |
|------------------------|--------|---------|----------------------------------|----------------------|------------|------------------|------------------|
| Acquisition Time (sec) | 0.6921 | Comment | single pulse decoupled gated NOE |                      | Date       |                  |                  |
| Date Stamp             |        |         |                                  |                      |            |                  |                  |
| Frequency (MHz)        | 150.91 | Nucleus | 13C                              | Number of Transients | 1000       | Origin           | ECA 600          |
| Original Points Count  | 32768  | Owner   | CKP                              | Points Count         | 32768      | Pulse Sequence   | single_pulse_dec |
| Receiver Gain          | 54.00  | Solvent | CHLOROFORM-d                     | Spectrum Offset (Hz) | 15091.3428 | Sweep Width (Hz) | 47348.49         |

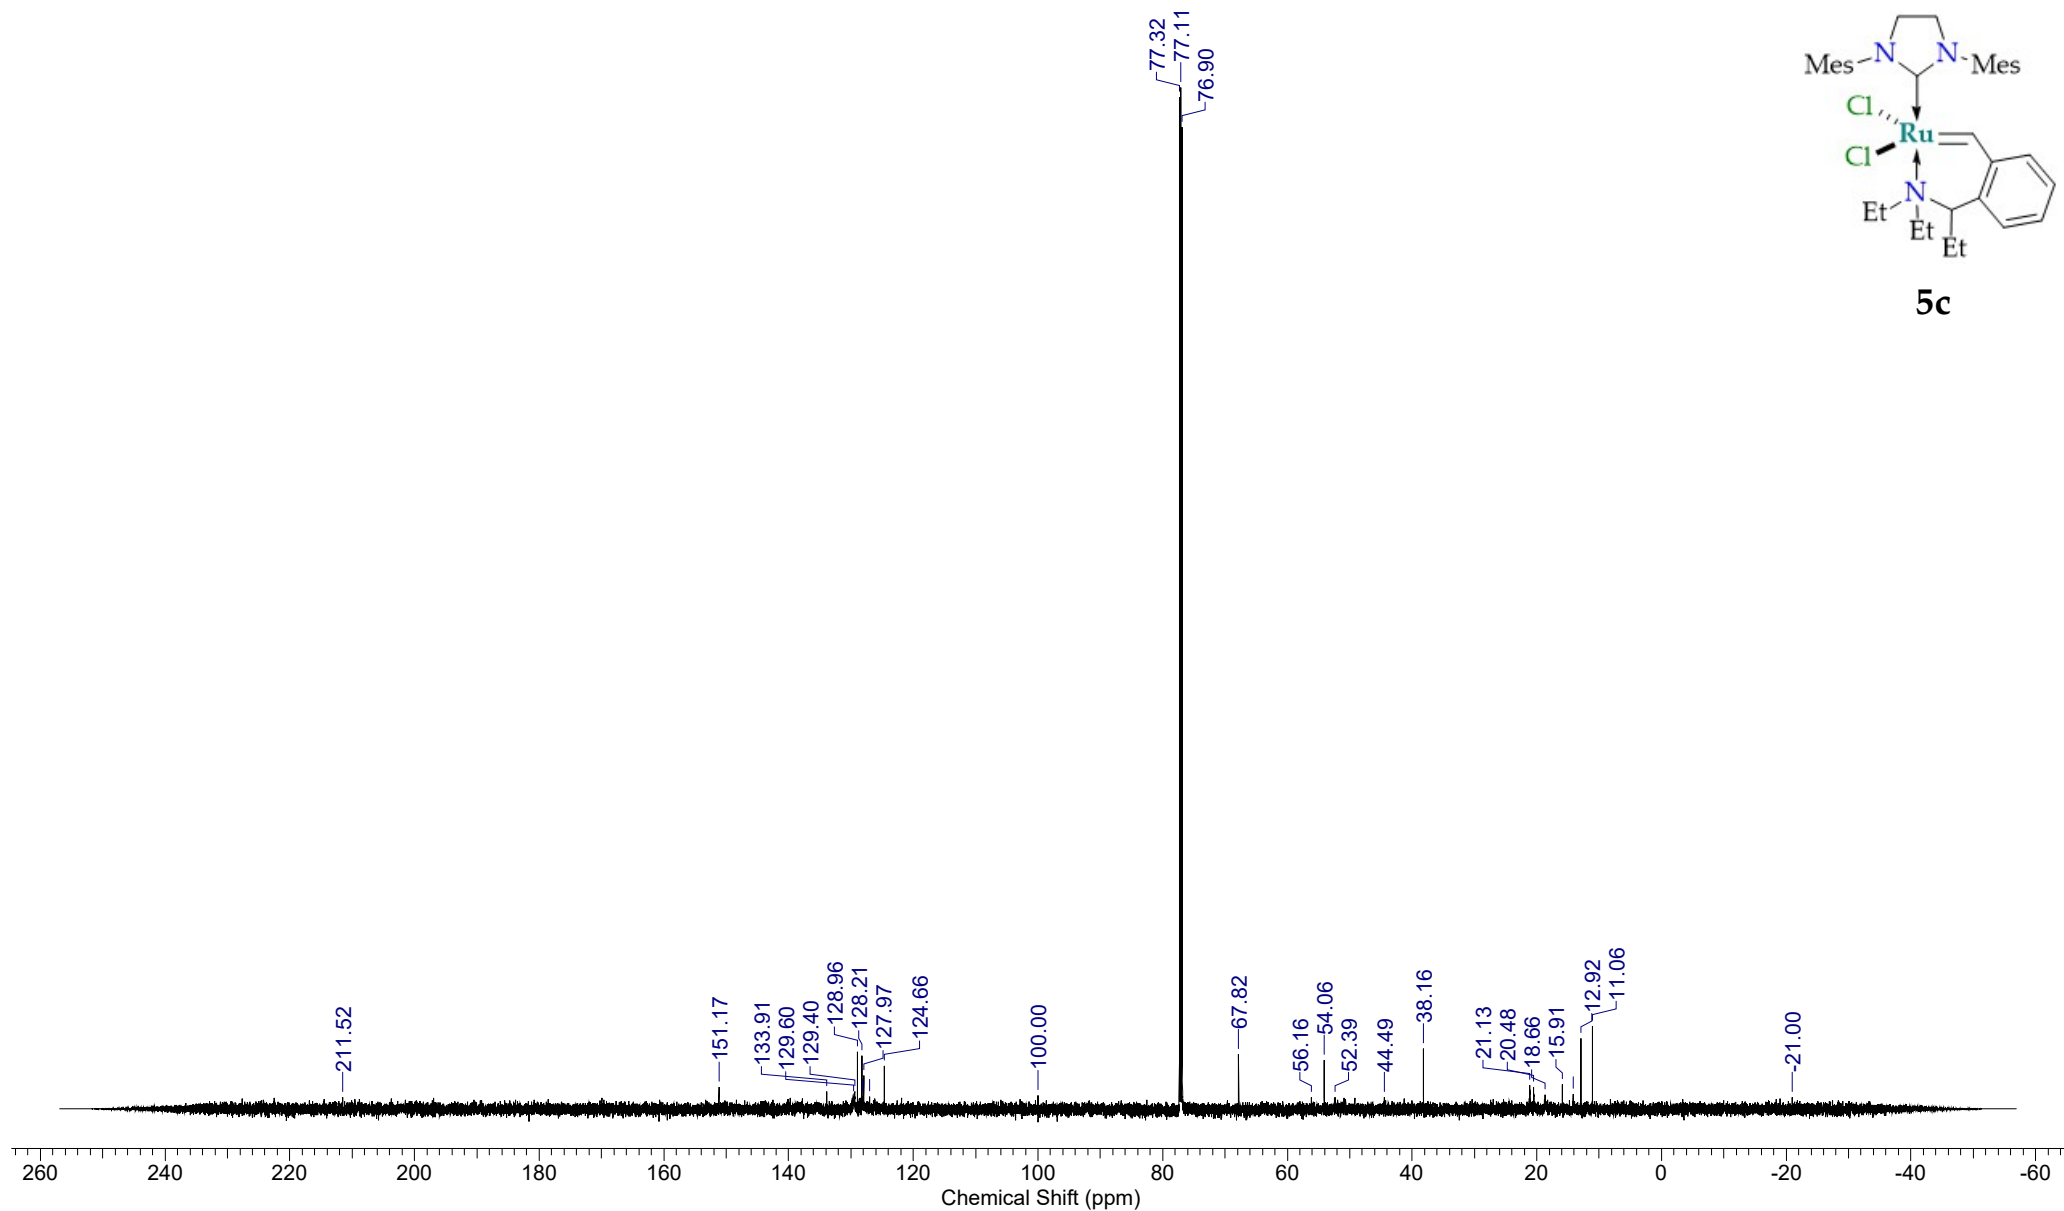

# <sup>1</sup>H spectrum of compound 5d

|                        |                      |           |              |                      |                      |
|------------------------|----------------------|-----------|--------------|----------------------|----------------------|
| Acquisition Time (sec) | 1.9818               | Comment   | single pulse | Date                 | 02 Nov 2022 13:18:46 |
| Date Stamp             | 02 Nov 2022 12:18:25 | File Name |              |                      |                      |
| Frequency (MHz)        | 600.17               | Nucleus   | 1H           | Number of Transients | 8                    |
| Original Points Count  | 32768                | Owner     | CKP          | Points Count         | 32768                |
| Receiver Gain          | 28.00                | Solvent   | CHLOROFORM-d | Pulse Sequence       | single_pulse.ex2     |
| Sweep Width (Hz)       | 16534.39             |           |              | Spectrum Offset (Hz) | 5498.8667            |

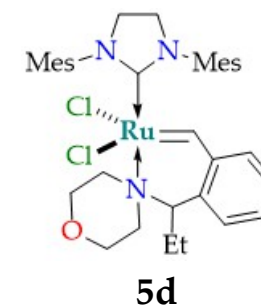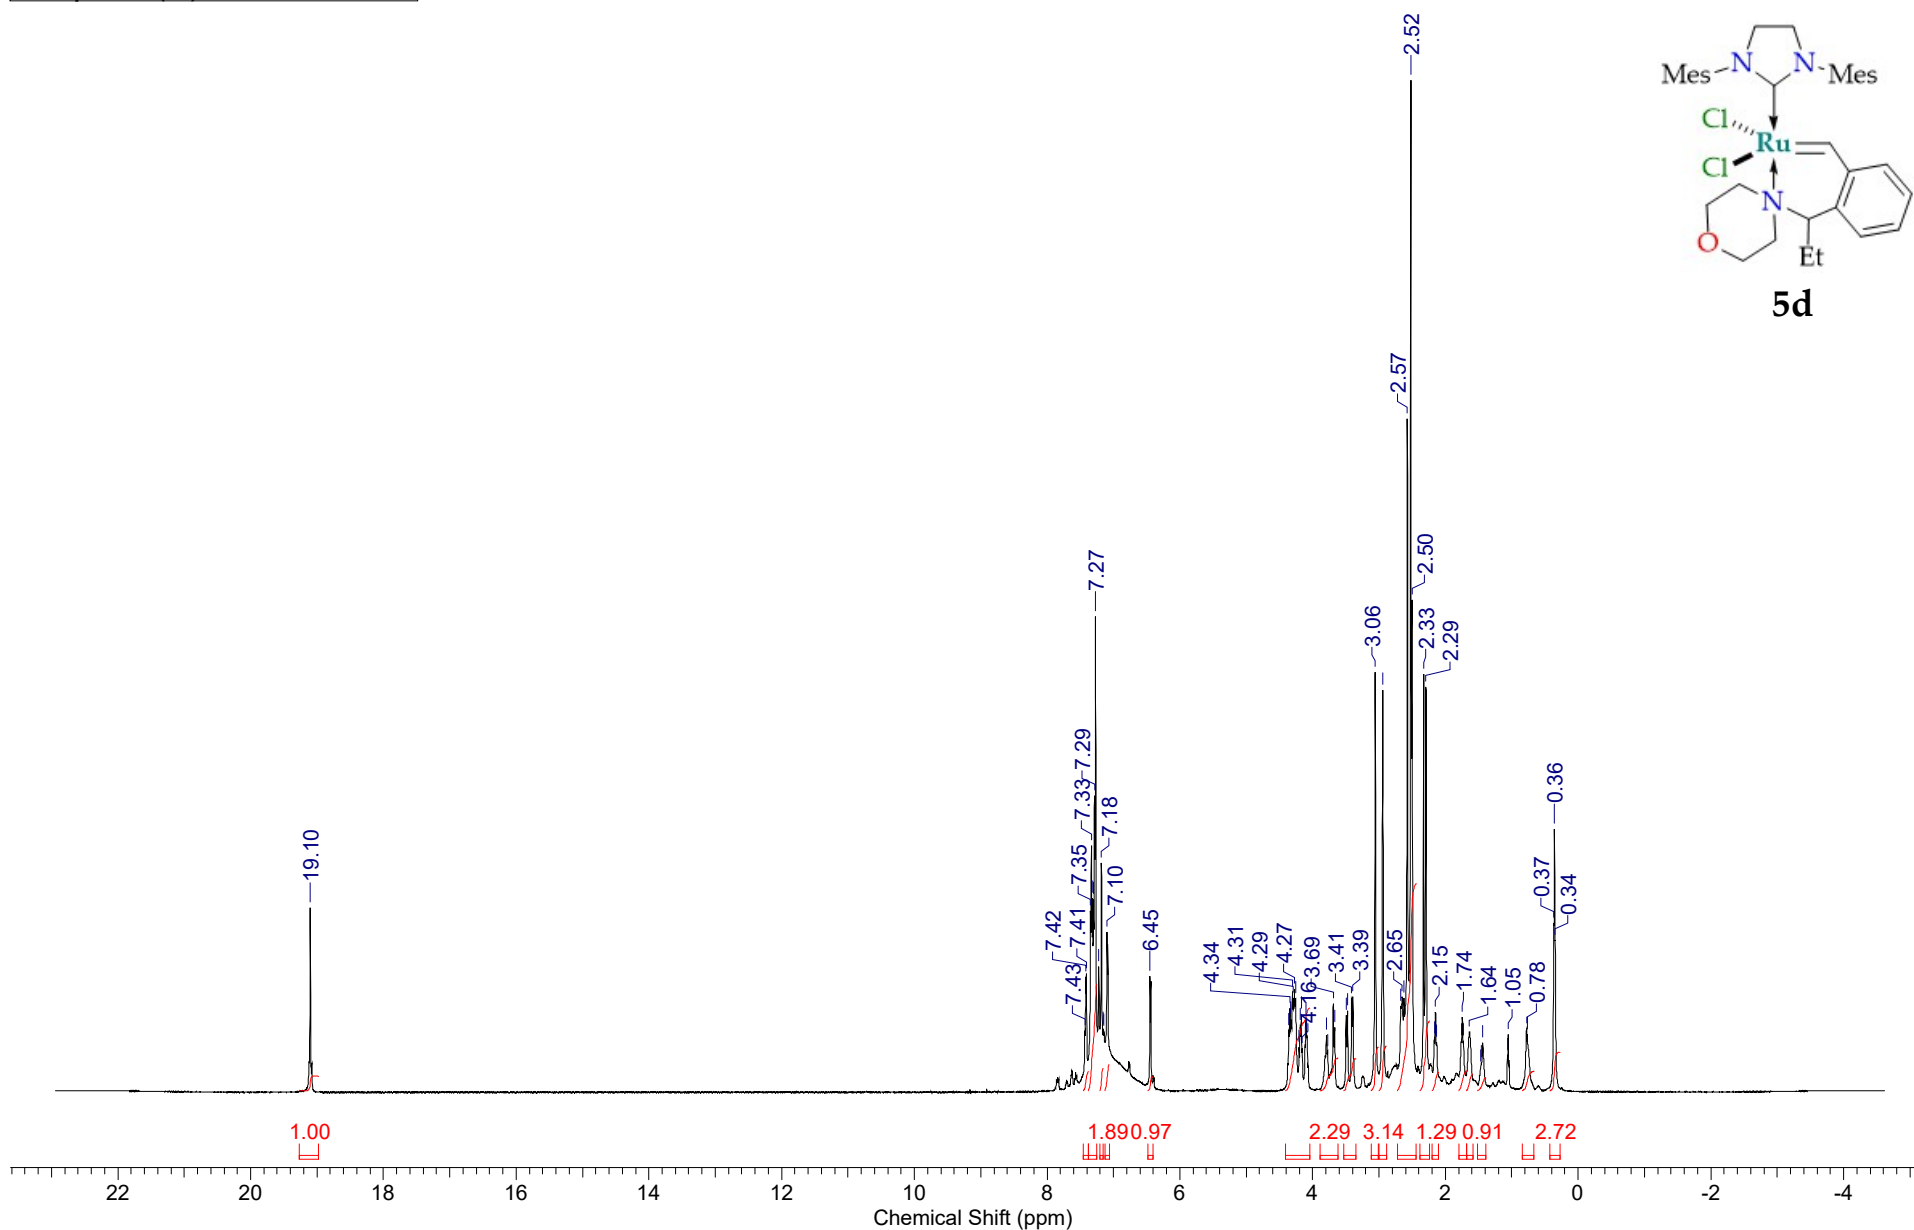

# <sup>1</sup>H spectrum of compound 5d

|                        |                      |           |              |                      |                      |
|------------------------|----------------------|-----------|--------------|----------------------|----------------------|
| Acquisition Time (sec) | 1.9818               | Comment   | single pulse | Date                 | 02 Nov 2022 13:18:46 |
| Date Stamp             | 02 Nov 2022 12:18:25 | File Name |              |                      |                      |
| Frequency (MHz)        | 600.17               | Nucleus   | 1H           | Number of Transients | 8                    |
| Original Points Count  | 32768                | Owner     | CKP          | Points Count         | 32768                |
| Receiver Gain          | 28.00                | Solvent   | CHLOROFORM-d | Pulse Sequence       | single_pulse.ex2     |
| Sweep Width (Hz)       | 16534.39             |           |              | Spectrum Offset (Hz) | 5498.8667            |

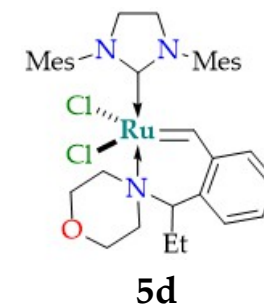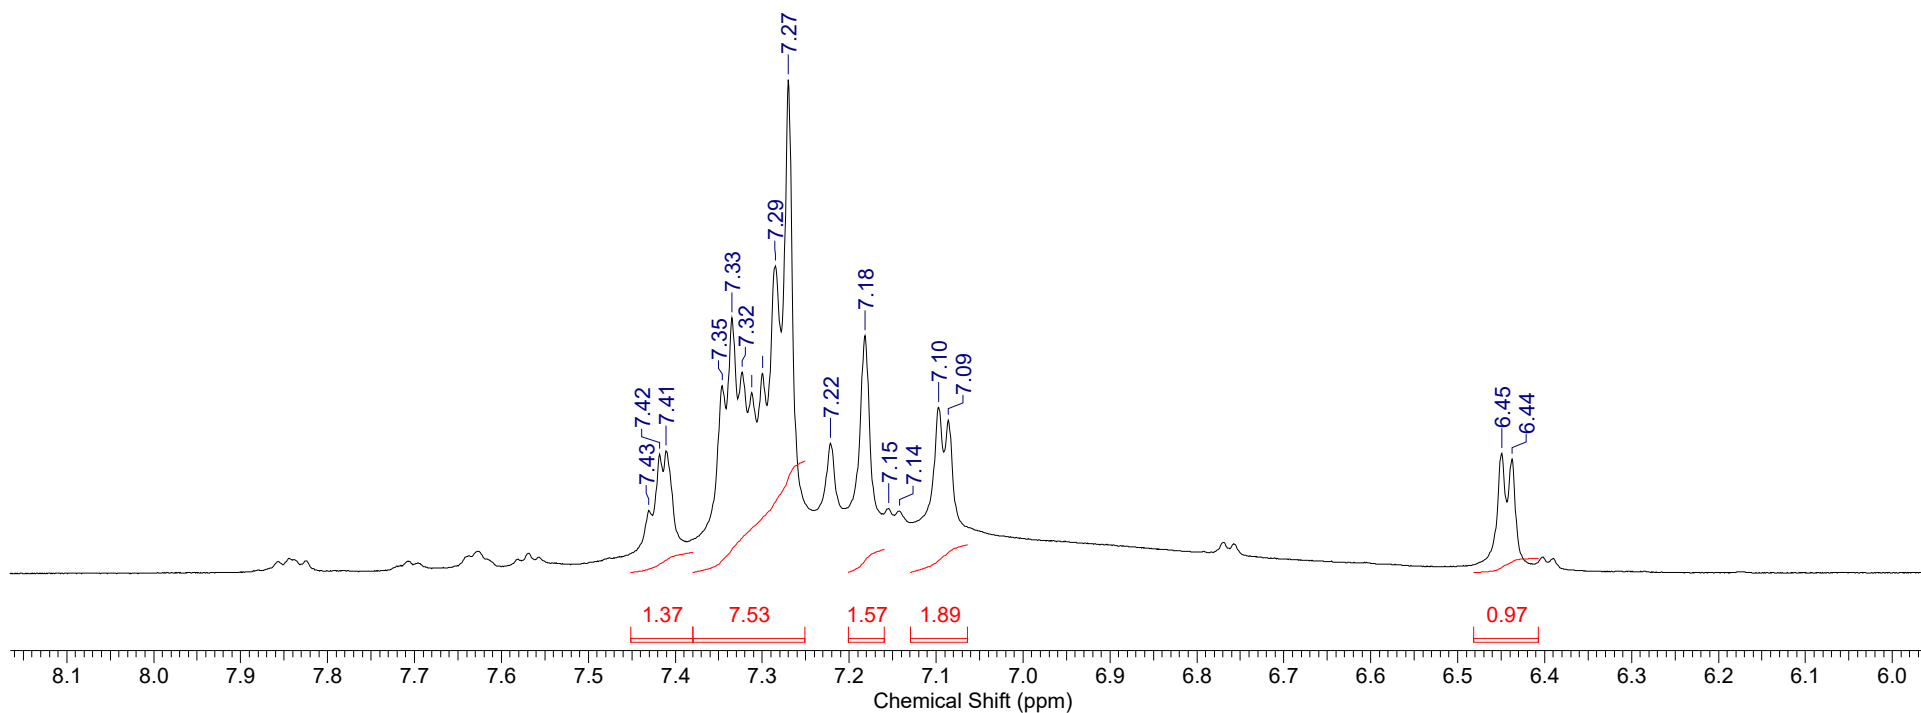

# $^1\text{H}$ spectrum of compound 5d

|                        |                      |           |              |                      |                      |
|------------------------|----------------------|-----------|--------------|----------------------|----------------------|
| Acquisition Time (sec) | 1.9818               | Comment   | single pulse | Date                 | 02 Nov 2022 13:18:46 |
| Date Stamp             | 02 Nov 2022 12:18:25 | File Name |              |                      |                      |
| Frequency (MHz)        | 600.17               | Nucleus   | $^1\text{H}$ | Number of Transients | 8                    |
| Original Points Count  | 32768                | Owner     | CKP          | Points Count         | 32768                |
| Receiver Gain          | 28.00                | Solvent   | CHLOROFORM-d | Pulse Sequence       | single_pulse.ex2     |
| Sweep Width (Hz)       | 16534.39             |           |              | Spectrum Offset (Hz) | 5498.8667            |

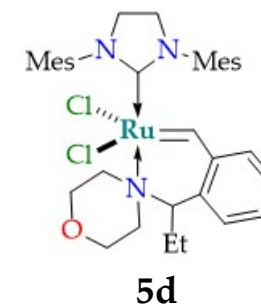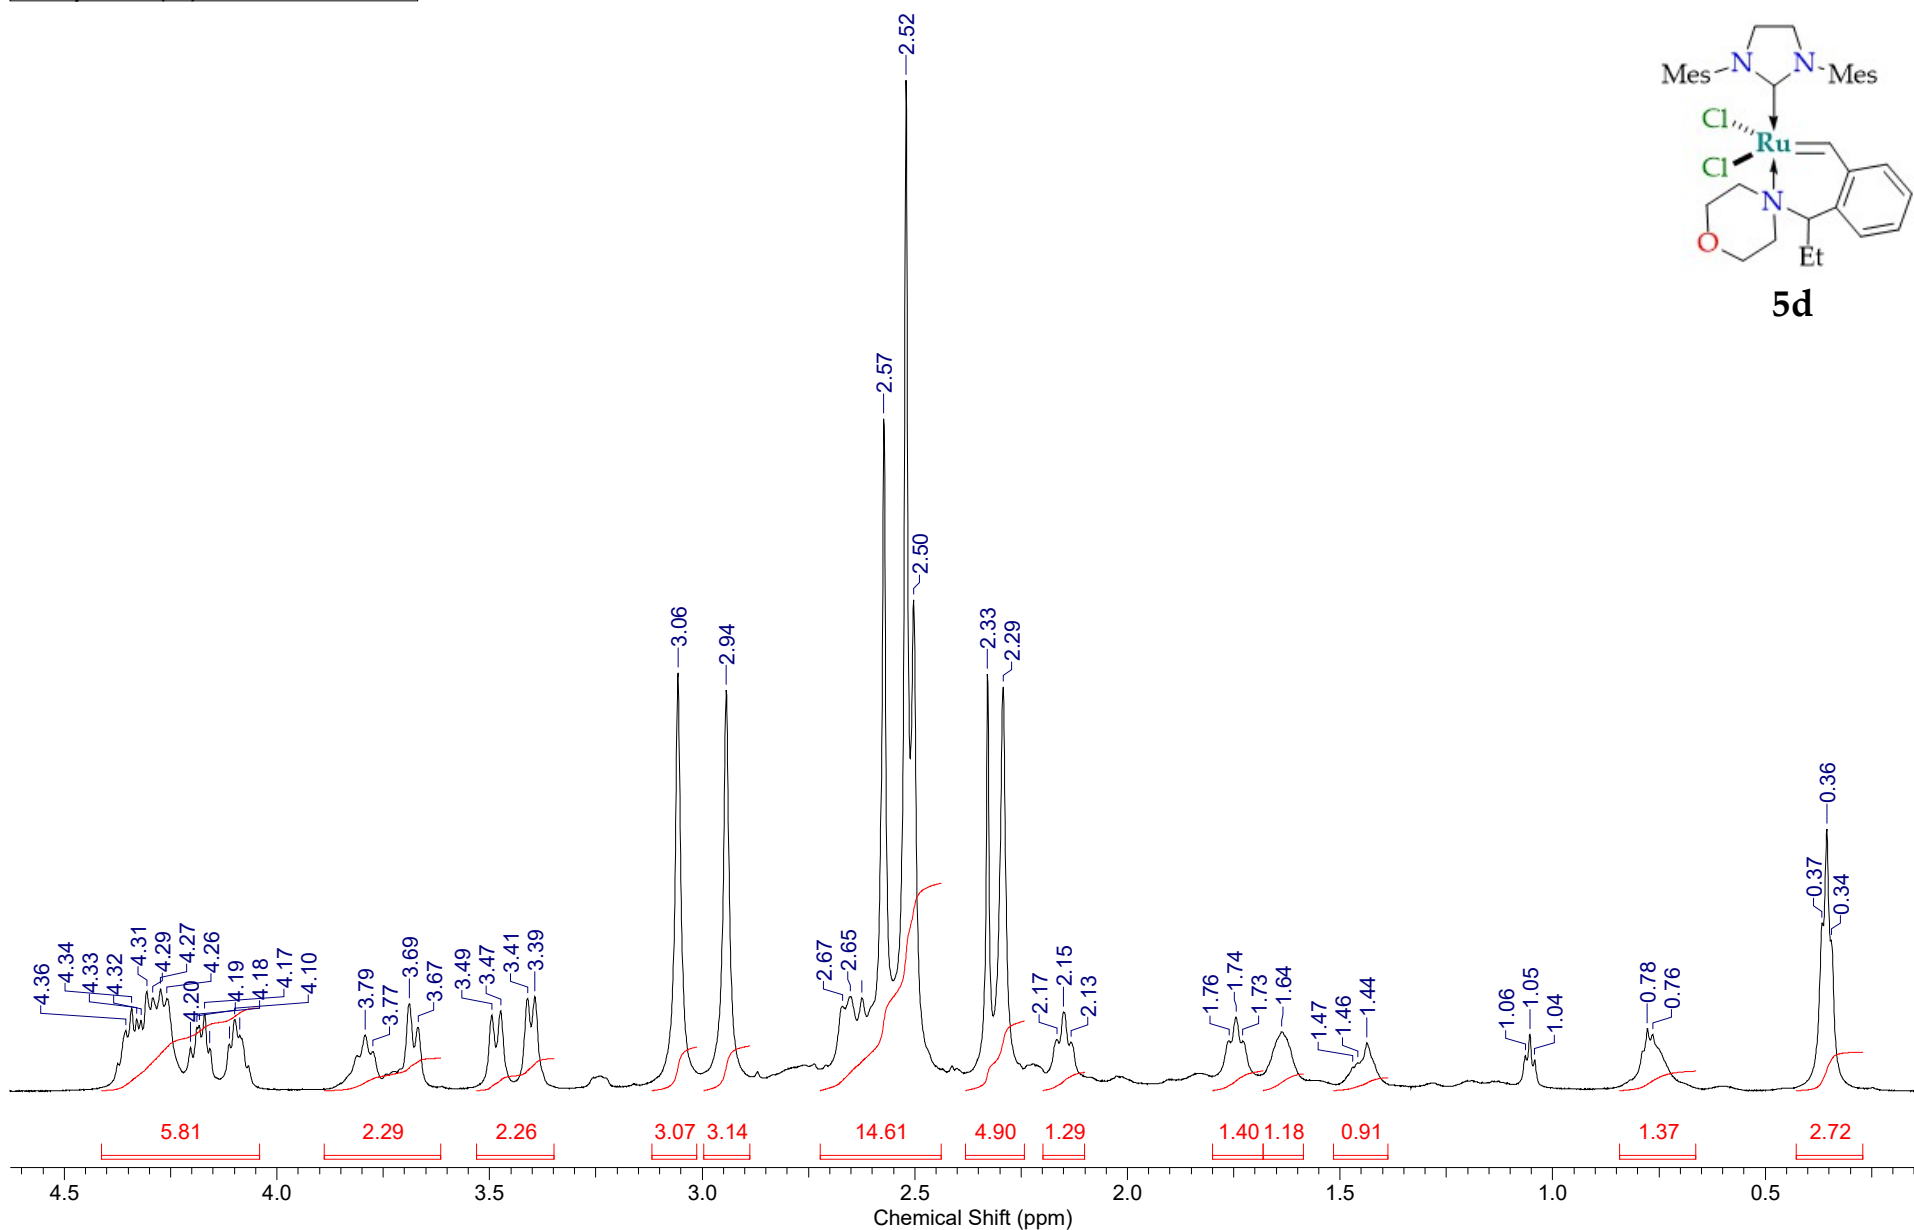

# $^{13}\text{C}$ spectrum of compound 5d

|                        |                      |         |                                  |                      |                      |                      |                  |
|------------------------|----------------------|---------|----------------------------------|----------------------|----------------------|----------------------|------------------|
| Acquisition Time (sec) | 1.7197               | Comment | single pulse decoupled gated NOE |                      | Date                 | 19 Jan 2023 04:22:34 |                  |
| Date Stamp             | 19 Jan 2023 03:20:04 |         |                                  | File Name            |                      |                      |                  |
| Frequency (MHz)        | 150.91               | Nucleus | 13C                              | Number of Transients | 4000                 | Origin               | ECA 600          |
| Original Points Count  | 131072               | Owner   | CKP                              | Points Count         | 131072               | Pulse Sequence       | single pulse dec |
| Receiver Gain          | 54.00                | Solvent | CHLOROFORM-d                     |                      | Spectrum Offset (Hz) | 25630.4414           |                  |
| Sweep Width (Hz)       | 76219.52             |         |                                  |                      |                      |                      |                  |

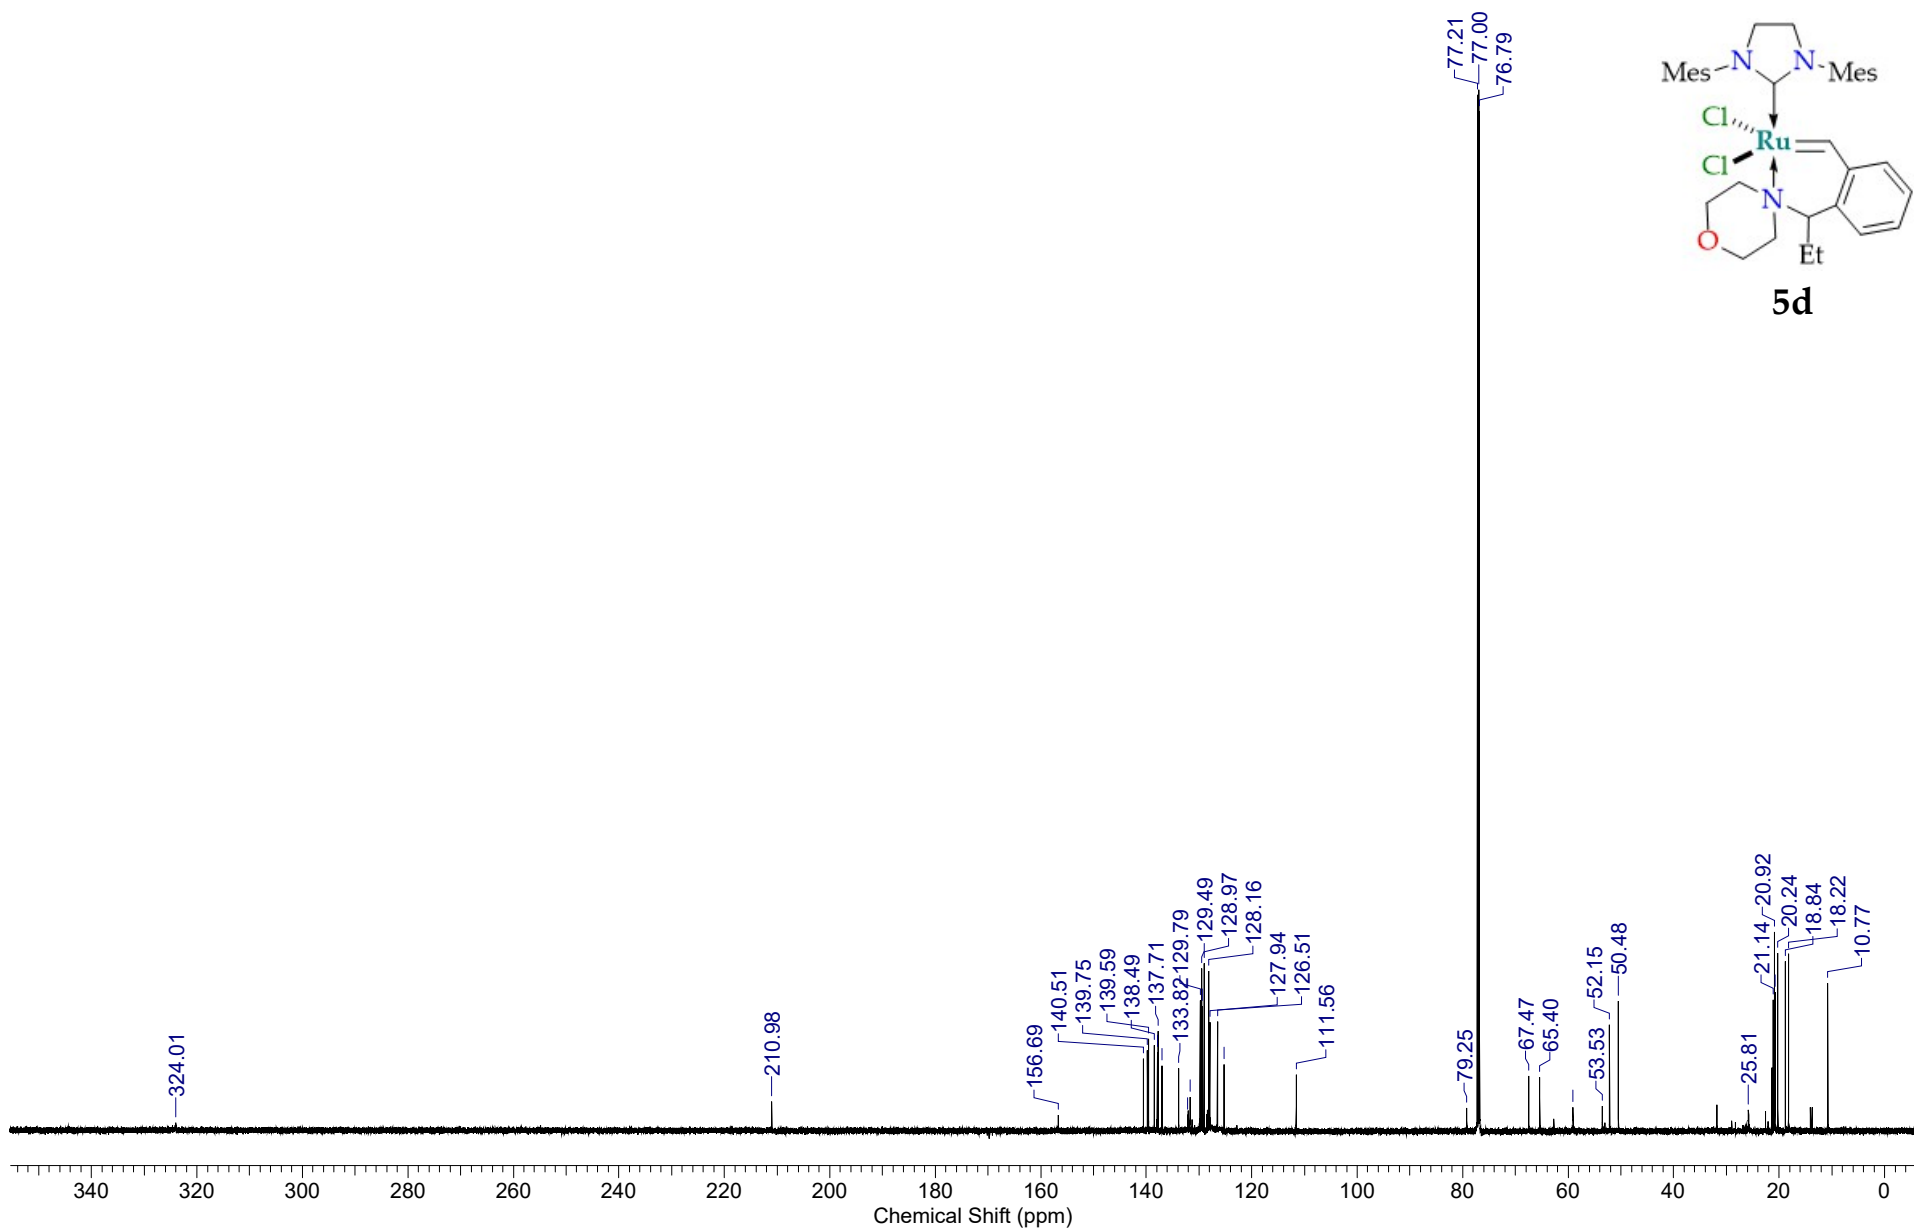

# $^{13}\text{C}$ spectrum of compound 5d

|                                 |  |                                          |  |                                 |  |
|---------------------------------|--|------------------------------------------|--|---------------------------------|--|
| Acquisition Time (sec) 0.6921   |  | Comment single pulse decoupled gated NOE |  | Date 02 Nov 2022 13:40:49       |  |
| Date Stamp 02 Nov 2022 12:40:28 |  | File Name                                |  |                                 |  |
| Frequency (MHz) 150.91          |  | Nucleus 13C                              |  | Number of Transients 1000       |  |
| Original Points Count 32768     |  | Owner CKP                                |  | Points Count 32768              |  |
| Receiver Gain 58.00             |  | Solvent CHLOROFORM-d                     |  | Pulse Sequence single_pulse_dec |  |
| Sweep Width (Hz) 47348.49       |  | Spectrum Offset (Hz) 15061.6152          |  |                                 |  |

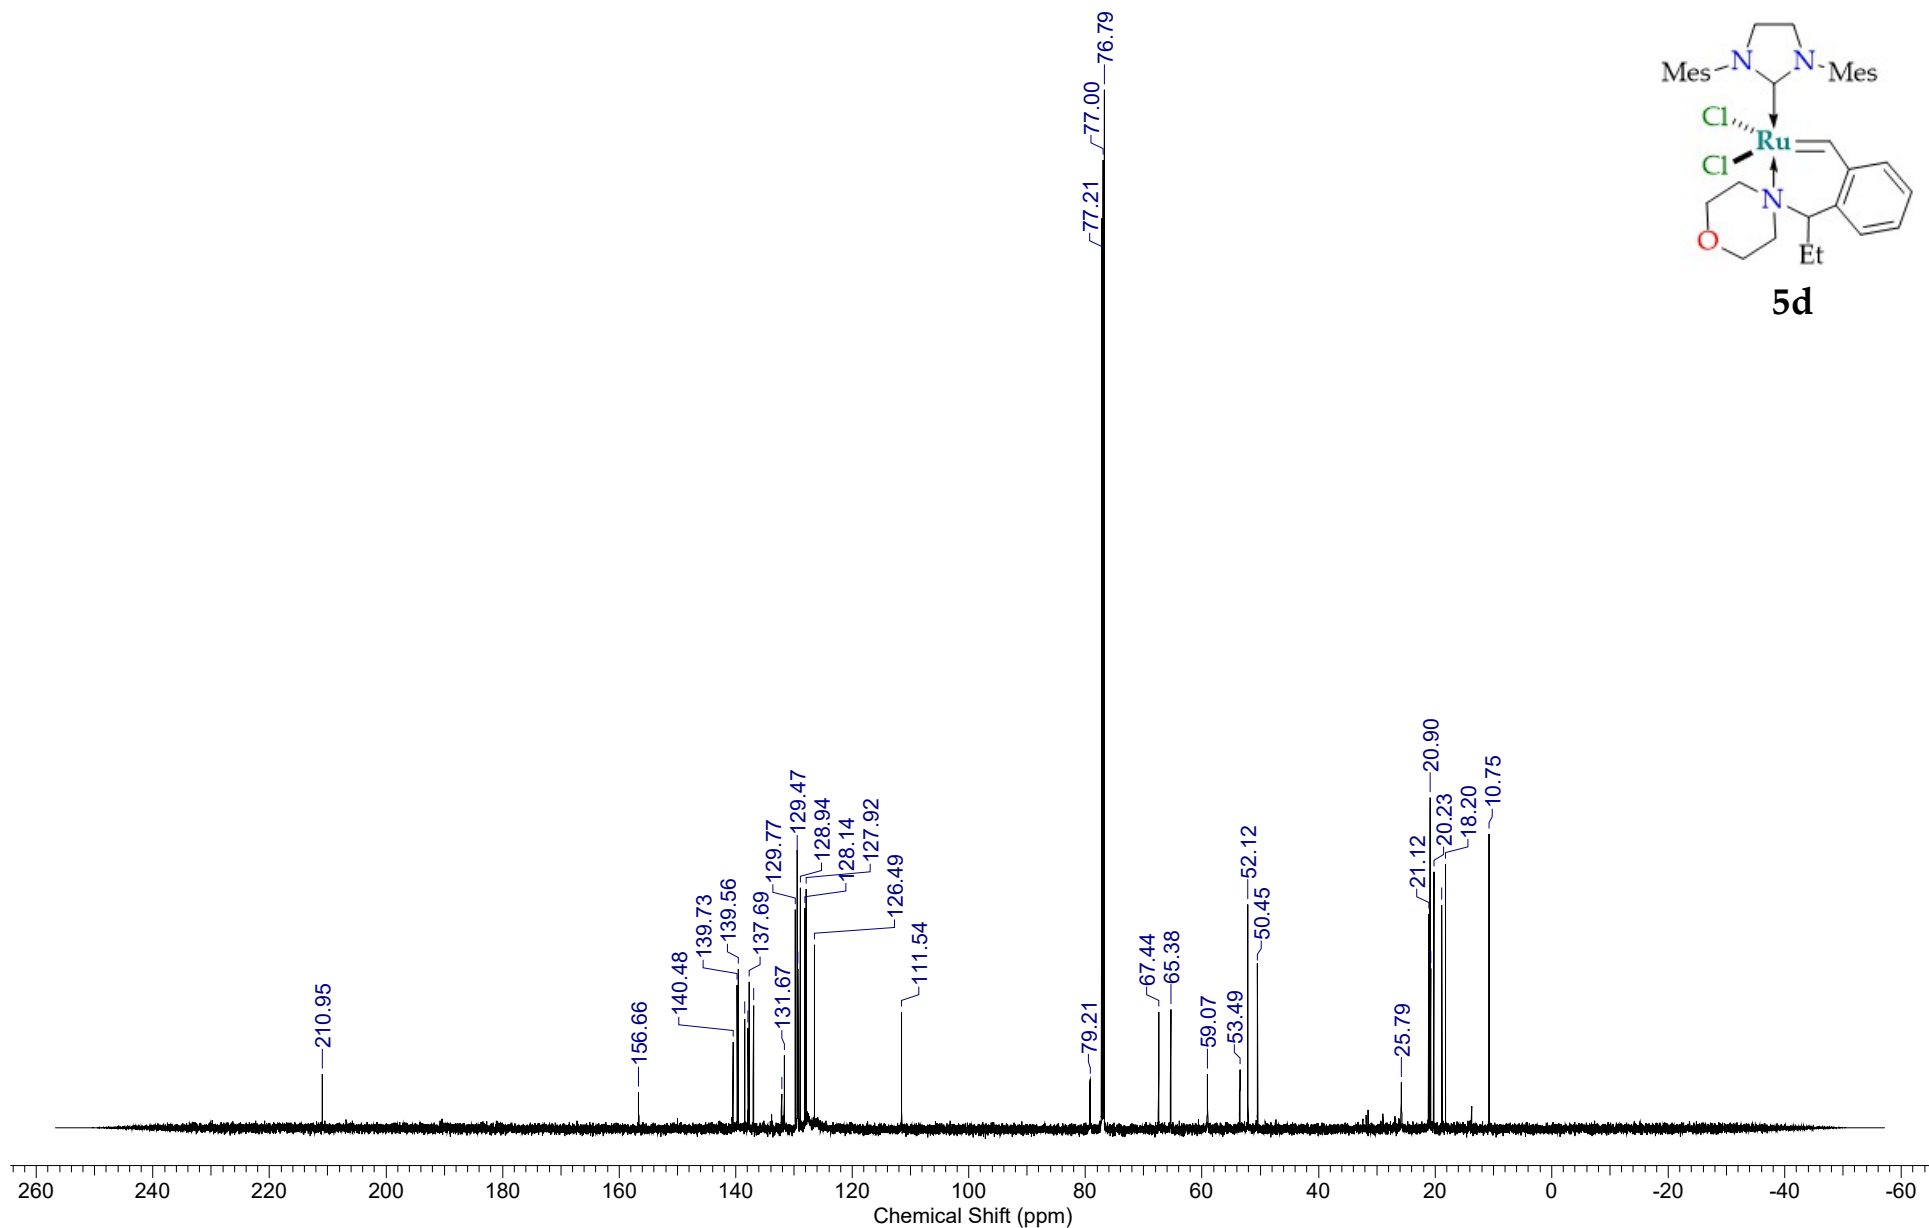

# $^{13}\text{C}$ spectrum of compound 5d

|                                 |  |                                          |  |                                 |  |
|---------------------------------|--|------------------------------------------|--|---------------------------------|--|
| Acquisition Time (sec) 0.6921   |  | Comment single pulse decoupled gated NOE |  | Date 02 Nov 2022 13:40:49       |  |
| Date Stamp 02 Nov 2022 12:40:28 |  | File Name                                |  |                                 |  |
| Frequency (MHz) 150.91          |  | Nucleus 13C                              |  | Number of Transients 1000       |  |
| Original Points Count 32768     |  | Owner CKP                                |  | Points Count 32768              |  |
| Receiver Gain 58.00             |  | Solvent CHLOROFORM-d                     |  | Pulse Sequence single_pulse_dec |  |
| Sweep Width (Hz) 47348.49       |  | Spectrum Offset (Hz) 15061.6152          |  |                                 |  |

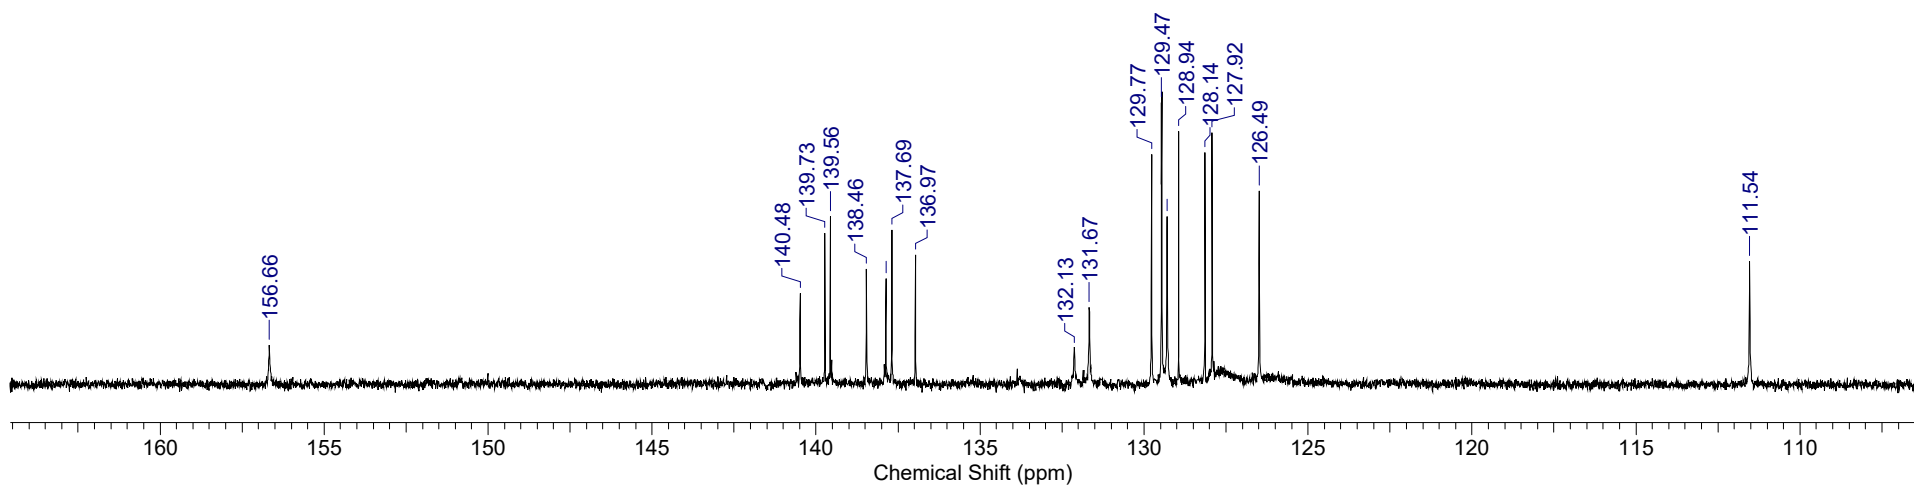

# $^{13}\text{C}$ spectrum of compound 5d

|                                 |          |         |                                  |                      |                                 |                      |                  |
|---------------------------------|----------|---------|----------------------------------|----------------------|---------------------------------|----------------------|------------------|
| Acquisition Time (sec) 0.6921   |          | Comment | single pulse decoupled gated NOE |                      | Date                            | 02 Nov 2022 13:40:49 |                  |
| Date Stamp 02 Nov 2022 12:40:28 |          |         |                                  | File Name            |                                 |                      |                  |
| Frequency (MHz)                 | 150.91   | Nucleus | 13C                              | Number of Transients | 1000                            | Origin               | ECA 600          |
| Original Points Count           | 32768    | Owner   | CKP                              | Points Count         | 32768                           | Pulse Sequence       | single_pulse_dec |
| Receiver Gain                   | 58.00    | Solvent | CHLOROFORM-d                     |                      | Spectrum Offset (Hz) 15061.6152 |                      |                  |
| Sweep Width (Hz)                | 47348.49 |         |                                  |                      |                                 |                      |                  |

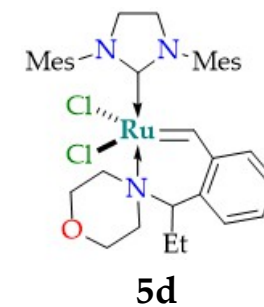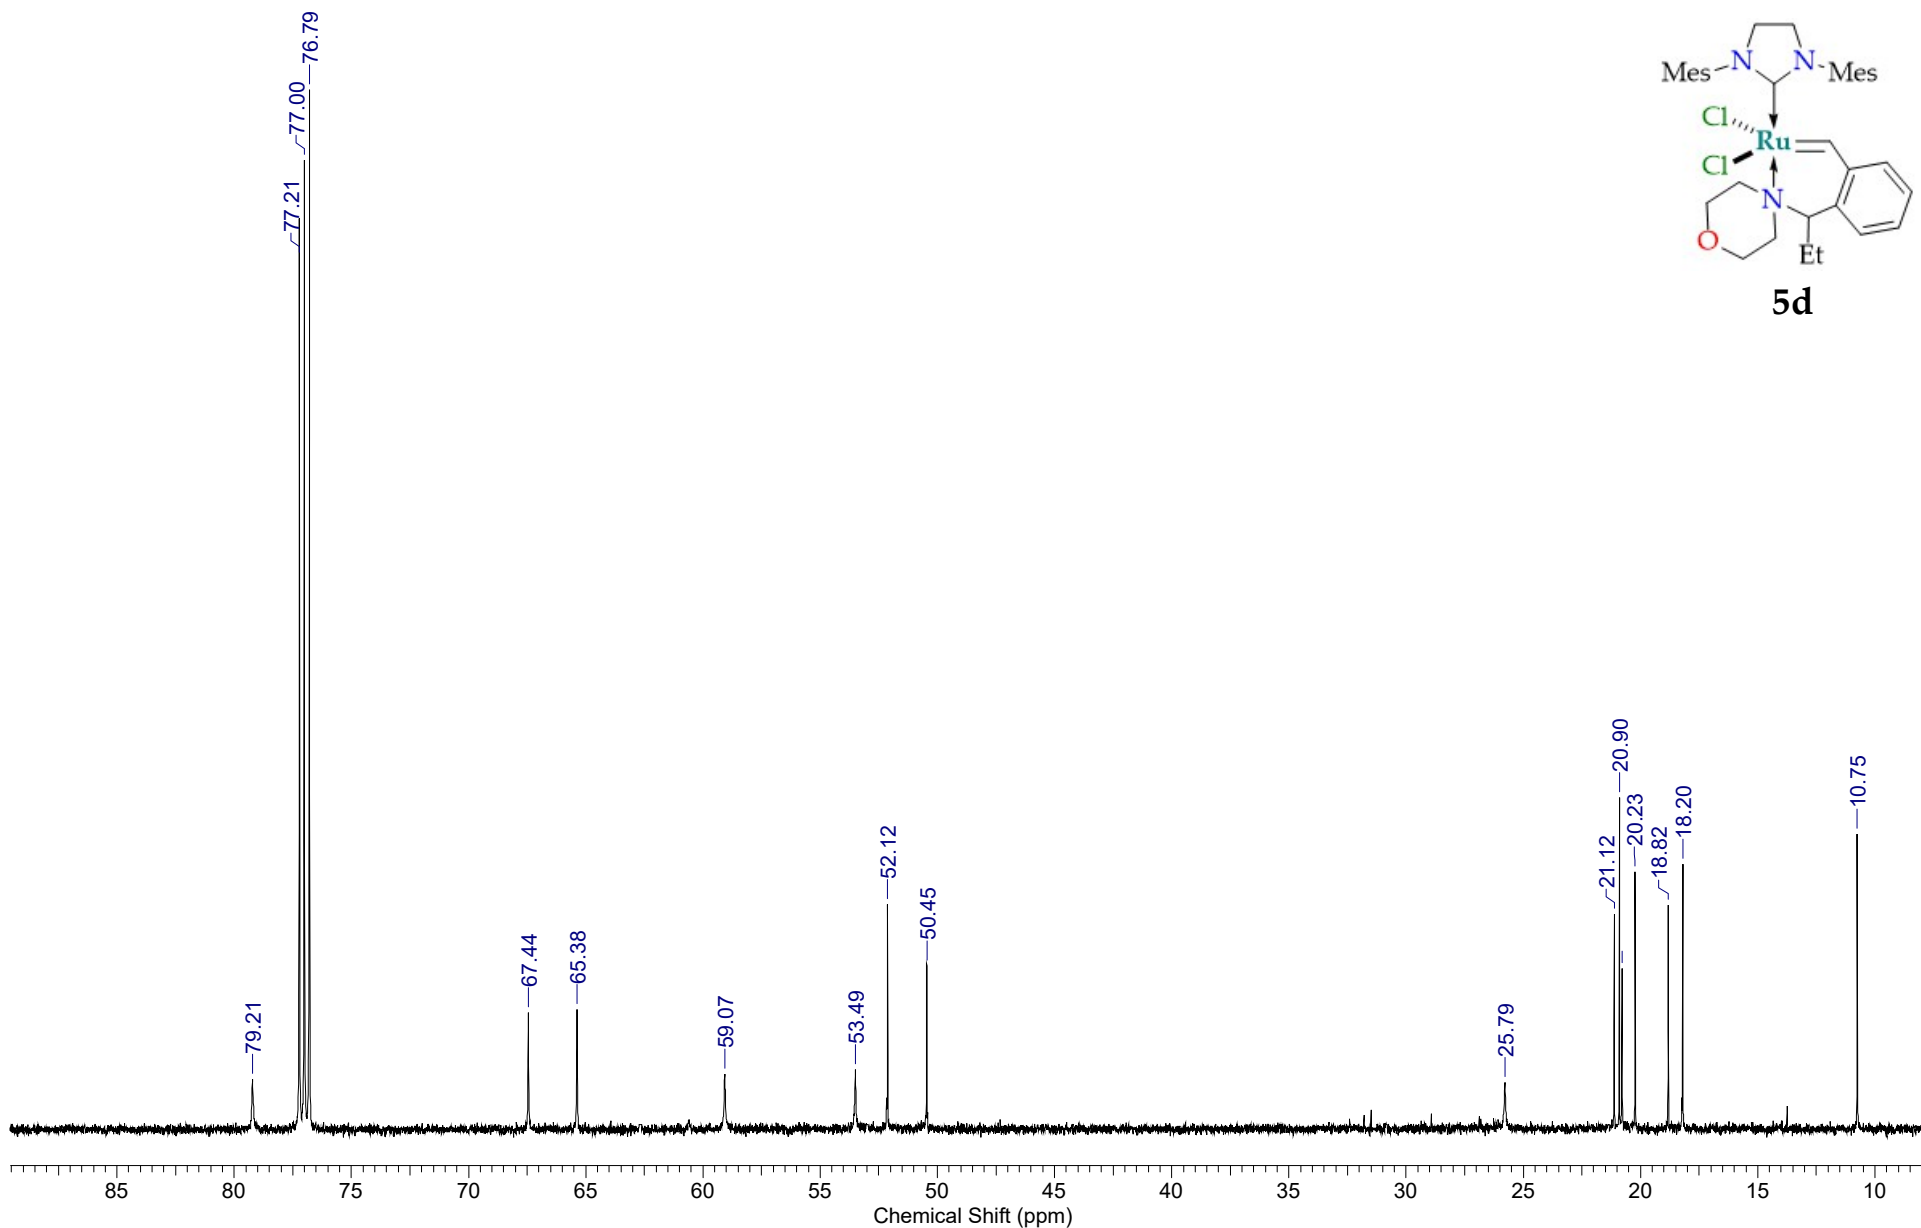



# IR spectrum of compound 5d

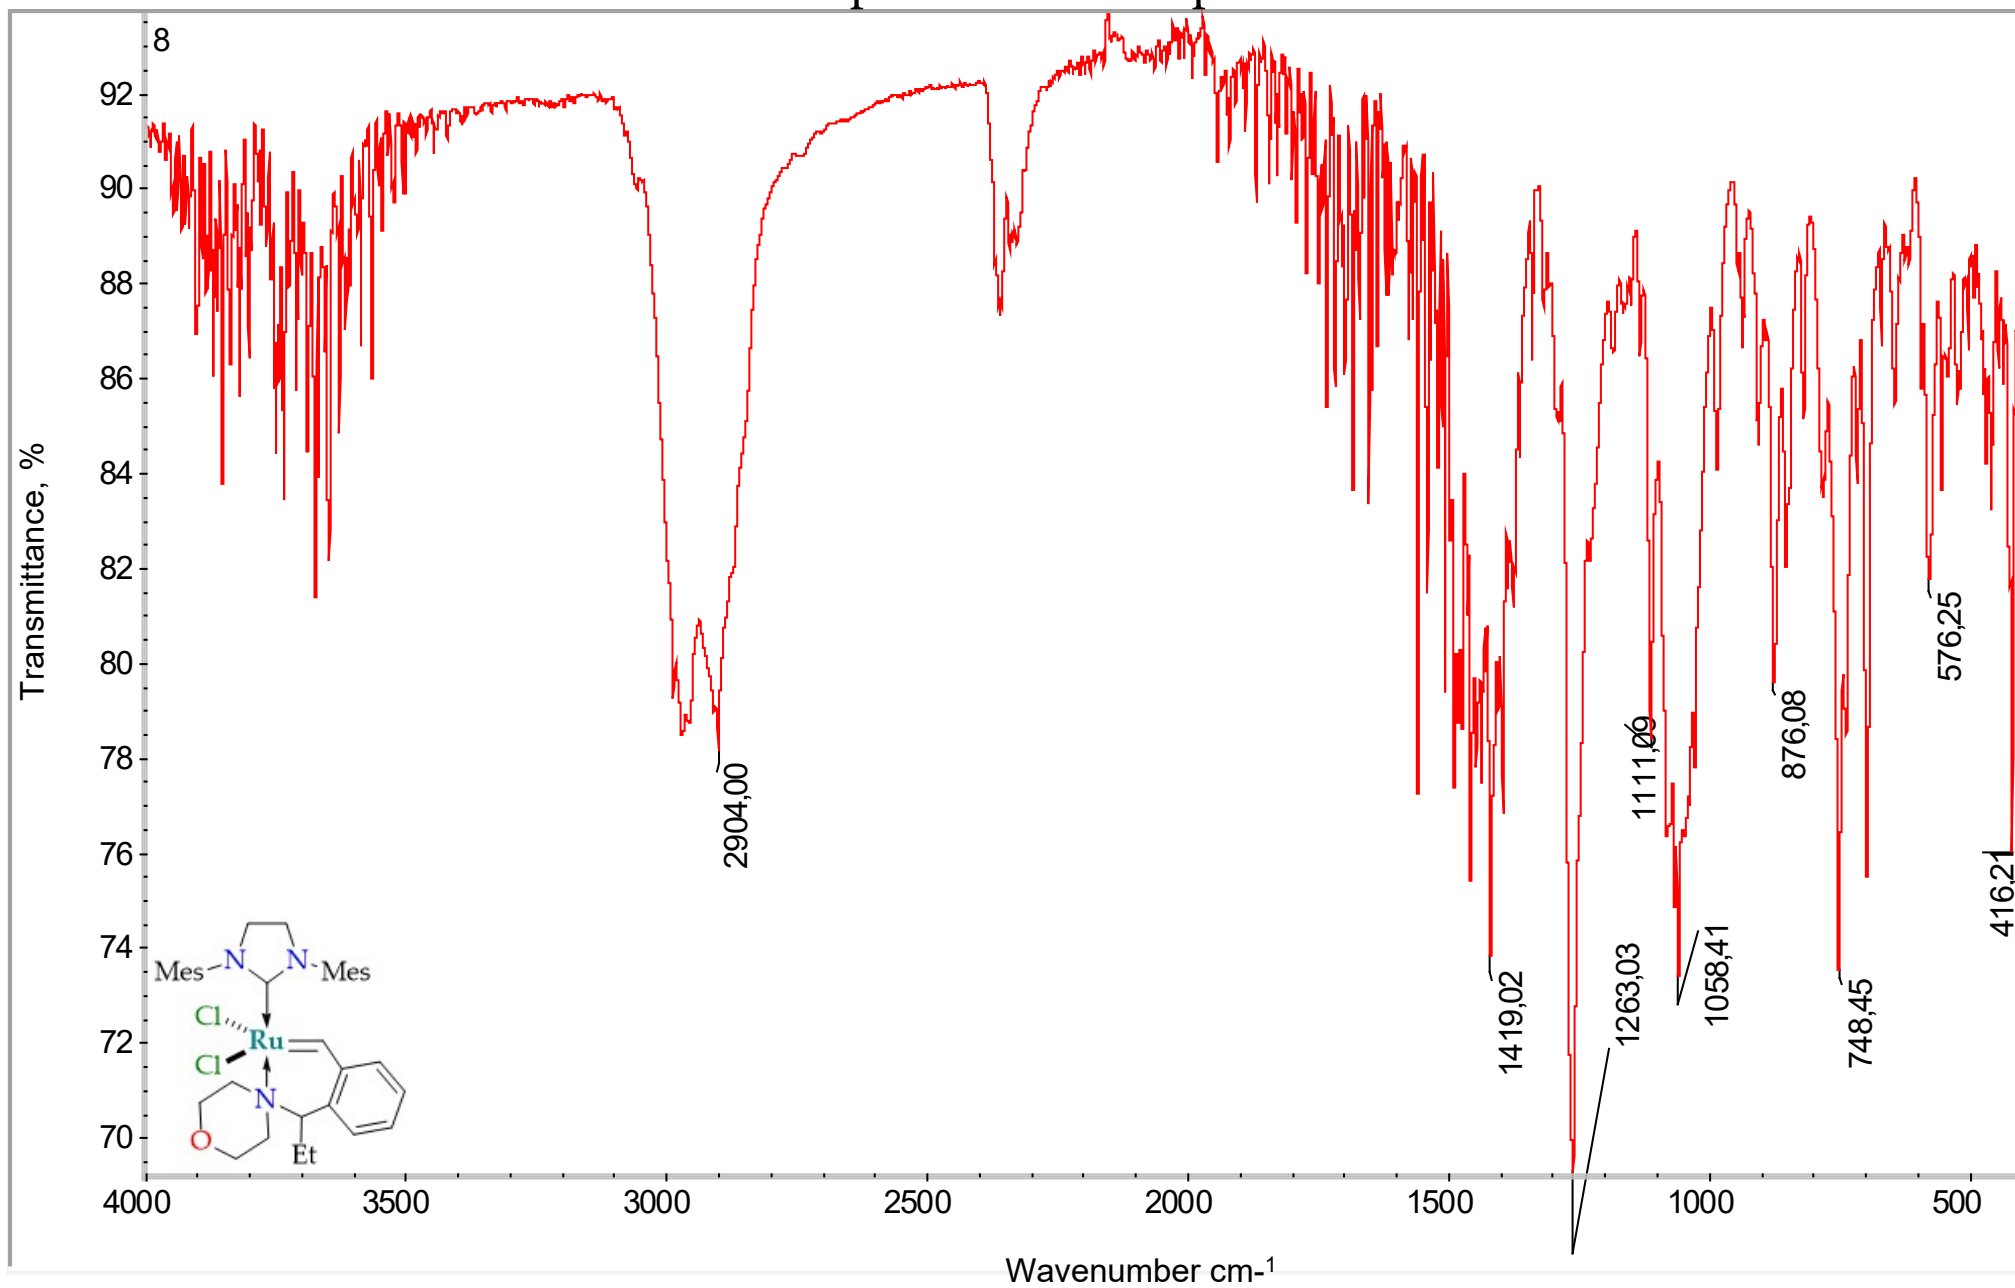

# MALDI-ToF MS of compound 5d

## Display Report

### Analysis Info

Analysis Name D:\Data\Surzhikova\MVGA-5d.d  
Method tune\_100-1200.m  
Sample Name  
Comment

Acquisition Date 12.01.2023 13:30:04

Operator BDAL@DE  
Instrument / Ser# maXis 43

### Acquisition Parameter

|             |          |                      |          |                  |           |
|-------------|----------|----------------------|----------|------------------|-----------|
| Source Type | ESI      | Ion Polarity         | Positive | Set Nebulizer    | 1.0 Bar   |
| Focus       | Active   |                      |          | Set Dry Heater   | 200 °C    |
| Scan Begin  | 50 m/z   | Set Capillary        | 4500 V   | Set Dry Gas      | 4.0 l/min |
| Scan End    | 1800 m/z | Set End Plate Offset | -500 V   | Set Divert Valve | Waste     |

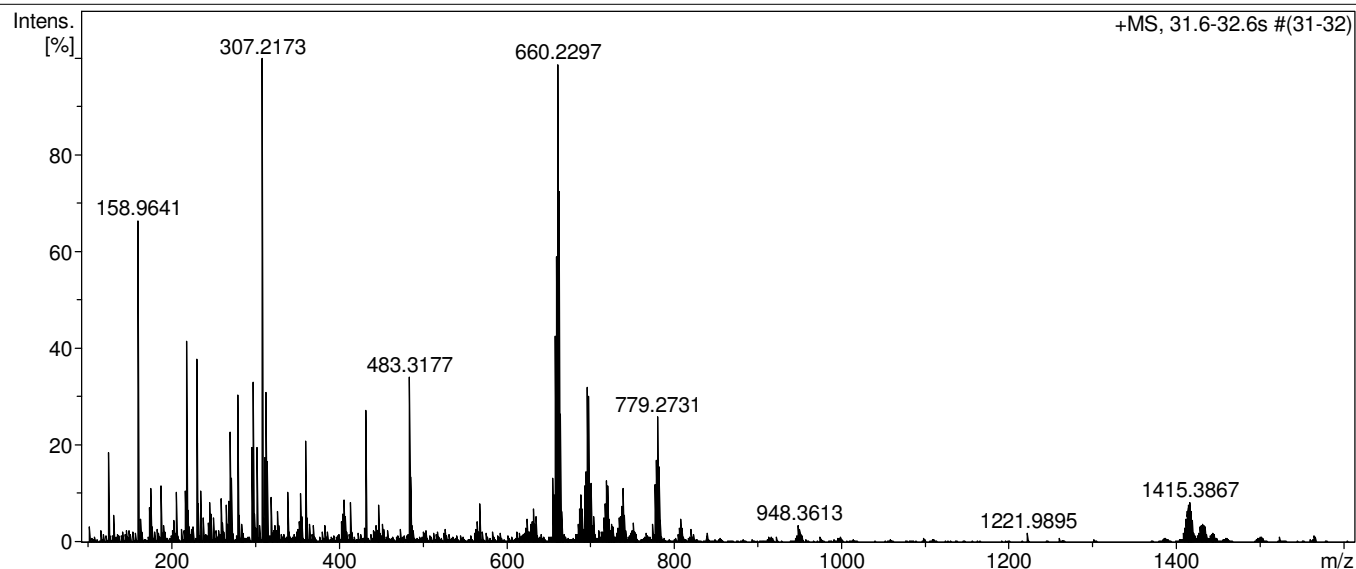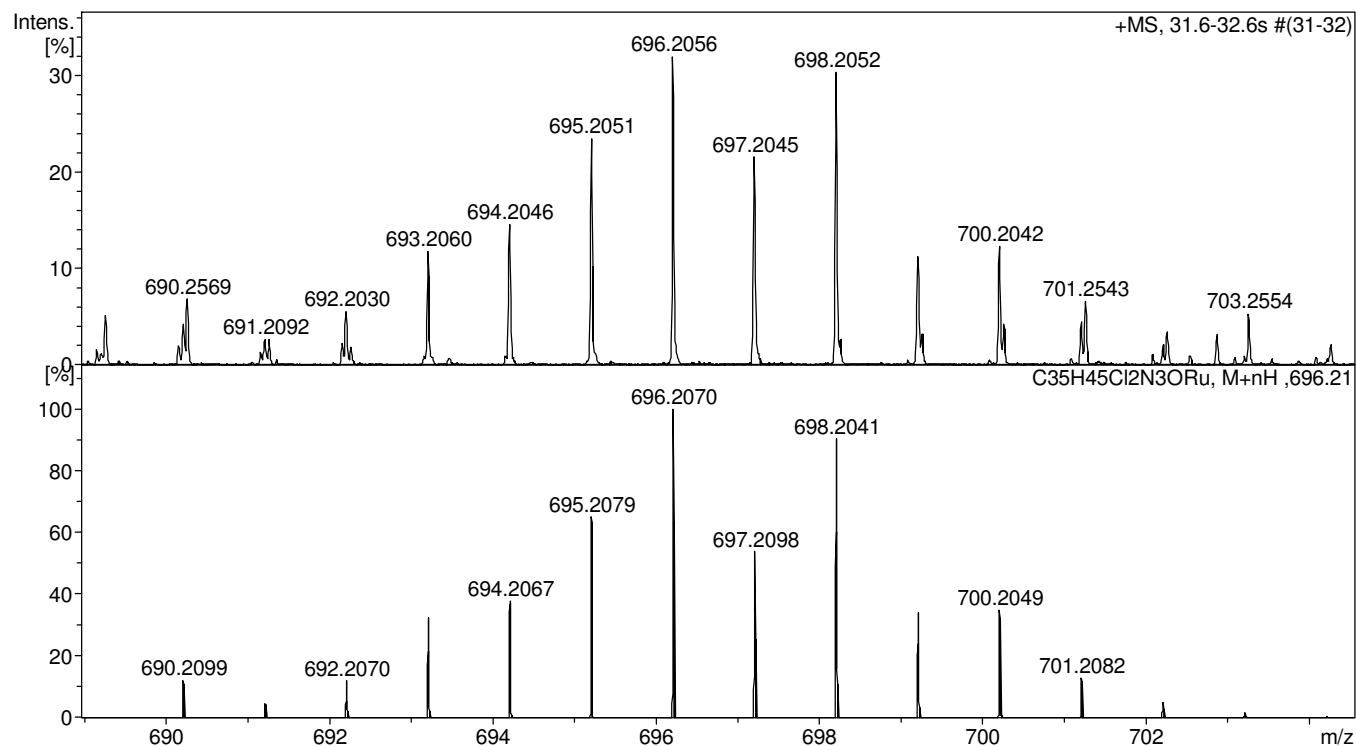

# MALDI-ToF MS of compound 5d

## Display Report

### Analysis Info

Analysis Name D:\Data\Surzhikova\MVGA-5d.d  
Method tune\_100-1200.m  
Sample Name  
Comment

Acquisition Date 12.01.2023 13:30:04

Operator BDAL@DE  
Instrument / Ser# maXis 43

### Acquisition Parameter

|             |          |                      |          |                  |           |
|-------------|----------|----------------------|----------|------------------|-----------|
| Source Type | ESI      | Ion Polarity         | Positive | Set Nebulizer    | 1.0 Bar   |
| Focus       | Active   |                      |          | Set Dry Heater   | 200 °C    |
| Scan Begin  | 50 m/z   | Set Capillary        | 4500 V   | Set Dry Gas      | 4.0 l/min |
| Scan End    | 1800 m/z | Set End Plate Offset | -500 V   | Set Divert Valve | Waste     |

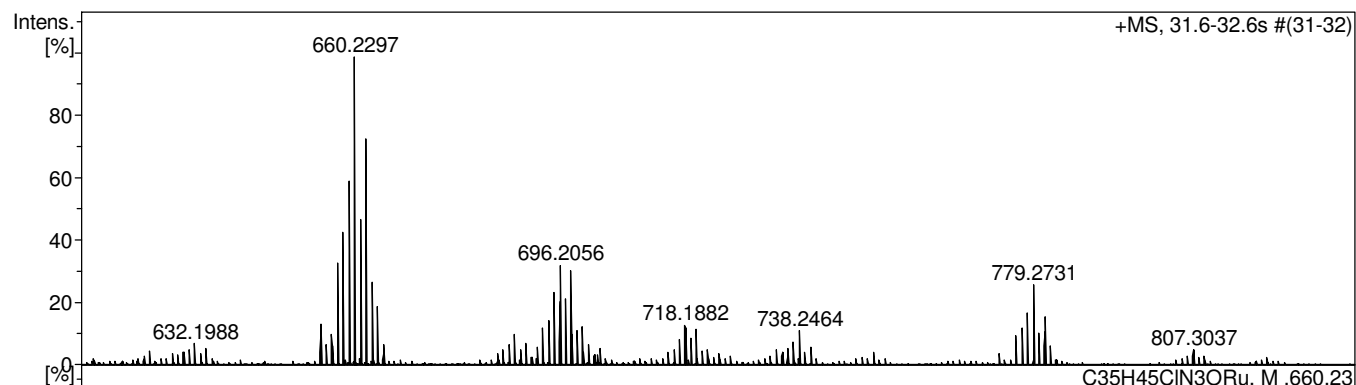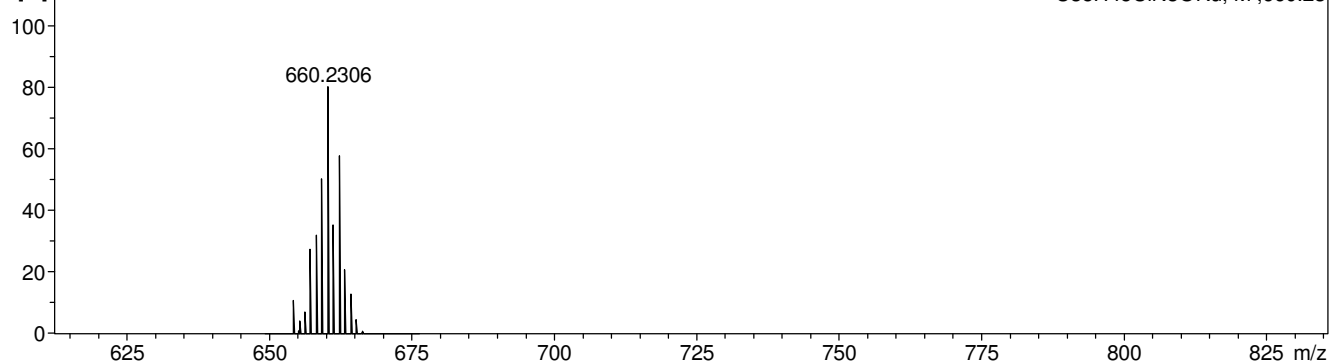

Supplement: s1 [file s1]
