# Supplementary material for: Influence of Substituents in a Six-Membered Chelate Ring of HG-Type Complexes Containing an N→Ru Bond on Their Stability and Catalytic Activity
Source: MDPI journal article supplement (doi:10.3390/molecules28031188), 2023-01-25
Supplement: s1 [file s1]

# Influence of Substituents in a Six-Membered Chelate Ring of HG-Type Complexes Containing an N→Ru Bond on Their Stability and Catalytic Activity

Kirill A. Vasilyev <sup>1</sup>, Alexandra S. Antonova <sup>1</sup>, Nikita S. Volchkov <sup>1</sup>, Nikita A. Logvinenko <sup>1</sup>,  
Eugeniya V. Nikitina <sup>1</sup>, Mikhail S. Grigoriev <sup>2</sup>, Anton P. Novikov <sup>1,2</sup>, Vladimir V. Kouznetsov <sup>3</sup>,  
Kirill B. Polyanskii <sup>1,\*</sup> and Fedor I. Zubkov <sup>1,\*</sup>

<sup>1</sup> Organic Chemistry Department, Faculty of Science, Peoples' Friendship University of Russia (RUDN University), Miklukho-Maklaya St., 6, Moscow 117198, Russia

<sup>2</sup> Frumkin Institute of Physical Chemistry and Electrochemistry, Russian Academy of Sciences, Leninsky pr. 31, bld. 4, Moscow 119071, Russia

<sup>3</sup> Laboratorio de Química Orgánica y Biomolecular, Escuela de Química, Universidad Industrial de Santander, Cl. 9 # Cra 27, Bucaramanga 680006, Colombia

\* Correspondence: 1236tgp@mail.ru (K.B.P.); fzubkov@sci.pfu.edu.ru (F.I.Z.)

## Content

|                                                                                                                           |    |
|---------------------------------------------------------------------------------------------------------------------------|----|
| <i>General remarks</i> .....                                                                                              | 2  |
| <i>Experimental Procedures</i> .....                                                                                      | 2  |
| 1. <i>Synthesis of styrenes 1a–c and 2a–c</i> .....                                                                       | 3  |
| 2. <i>Synthesis of styrenes 3a–c</i> .....                                                                                | 5  |
| 3. <i>Synthesis of styrenes 1d and 3d</i> .....                                                                           | 7  |
| 4. <i>Optimization of conditions for complexes 4 and 5 preparation</i> .....                                              | 9  |
| 5. <i>General procedure for synthesis of complexes 4 and 5</i> .....                                                      | 10 |
| 6. <i>Activity of 4 and 5 in RCM reactions with N,N-diallyltosylamide</i> .....                                           | 14 |
| 7. <i>Polymerization of norborn-5-ene-2,3-dicarboxylic acid dibutyl ester (DBNB) catalyzed by complexes 4 and 5</i> ..... | 16 |
| 8. <i>X-ray analysis</i> .....                                                                                            | 17 |
| 9. <i>References</i> .....                                                                                                | 42 |
| 10. <i>Copies of NMR, FTIR and mass spectra for compounds 1–5</i> .....                                                   | 42 |

### General remarks

All experiments with ruthenium derivatives were performed under an inert atmosphere (Ar), using standard Schlenk techniques, dry and oxygen-free solvents. Before experiments, toluene, THF and heptane were distilled over sodium under an argon atmosphere. Metathesis reactions required solvents (CH<sub>2</sub>Cl<sub>2</sub>) pre-dried over anhydrous P<sub>2</sub>O<sub>5</sub> and an inert atmosphere (dry Ar). All other reagents were purchased from commercial suppliers (Acros Organics and Merck) and used without further purification. Thin layer chromatography (TLC) was carried out on aluminum backed silica pre-coated plates «Sorbfil» or «Alugram». The plates were visualized using a water solution of KMnO<sub>4</sub> or UV (254 nm). Eluents were *n*-hexane for styrenes and *n*-hexane : ethyl acetate = 3:1 for ruthenium complexes.

<sup>1</sup>H and <sup>13</sup>C NMR spectra were recorded in CDCl<sub>3</sub> solutions on 700 MHz (700.2 MHz for <sup>1</sup>H and 176.1 MHz for <sup>13</sup>C), 600 MHz (600.1 MHz for <sup>1</sup>H and 150.9 MHz for <sup>13</sup>C), 500 MHz (500.1 MHz for <sup>1</sup>H and 125.8 MHz for <sup>13</sup>C) or 300 MHz (300.1 MHz for <sup>1</sup>H and 75.5 MHz for <sup>13</sup>C) spectrometers using residual solvent signals (δ 7.27/77.0 ppm for <sup>1</sup>H/<sup>13</sup>C CDCl<sub>3</sub>) or SiMe<sub>4</sub> as an internal standard. Chemical shifts are given relative to SiMe<sub>4</sub> or referenced to the residual solvent signals. In some cases, the obtained in CDCl<sub>3</sub> NMR spectra were strongly broadened due to the slow rotation on the Mes fragments around the C-N bonds. To overcome this difficulty, the spectra in dichloromethane (CD<sub>2</sub>Cl<sub>2</sub>, δ 5.36/53.4 ppm residual signals) were recorded. Assignments of <sup>1</sup>H, <sup>13</sup>C signals were made with the aid of 2D COSY, HSQC, and HMBC spectra.

IR spectra were obtained using an Infracum FT-801 (in KBr pellets or in thin films) or Nicolet 6700 FTIR spectrometers (for powders deposited on a diamond crystal) over the wavenumber ranges 4800–400 cm<sup>-1</sup>. HR-MALDI-ToF mass spectra for styrene ligands were recorded using a ToF mass spectrometer Bruker autoflex speed, equipped with a solid-state UV-laser of 355 nm and operated in positive reflectron mode. Solutions of the analytes (2 mg/mL) in CH<sub>2</sub>Cl<sub>2</sub> were deposited on steel targets (MTP 384 ground steel; Bruker Daltonics Inc., Germany) and air-dried. High-resolution mass spectra (ESI-MS TOF) of the Grubbs catalysts were recorded on a Bruker maXis Q-TOF instrument (Bruker Daltonik) equipped with an electrospray ionization (ESI) source. The measurements were performed in positive (+) MS ion mode (HV capillary: 4.5 kV; spray shield: -0.5 kV) with a scan range of *m/z* 50–1800. External calibration of the mass spectrometer was performed using a low-concentration using mix solution (Agilent Technologies). Direct syringe injection was applied to the solution in MeCN. Nitrogen was used as the nebulizing (1.0 bar) and drying gas (200 °C, 4.0 L·min<sup>-1</sup>). All spectra were recorded at 1 Hz frequency and processed using the Bruker Data Analysis 5.1 software package.

Microanalyses were performed for C, H, N on an Eurovector EA 3000 (CHNS) elemental analysis system and were within ±0.5% of theoretical values.

### Experimental Procedures

1-Alkyl-3,4-dihydroisoquinolines were used as precursors for preparation of **1a–c** and **2a–c**. Synthesis of 1-substituted-3,4-dihydroquinolines includes acylation of phenethylamine and a further cyclization of the resulting amide by the Bischler-Napieralski reaction according to previously described procedures [1].

## 1. Synthesis of styrenes 1a–c and 2a–c

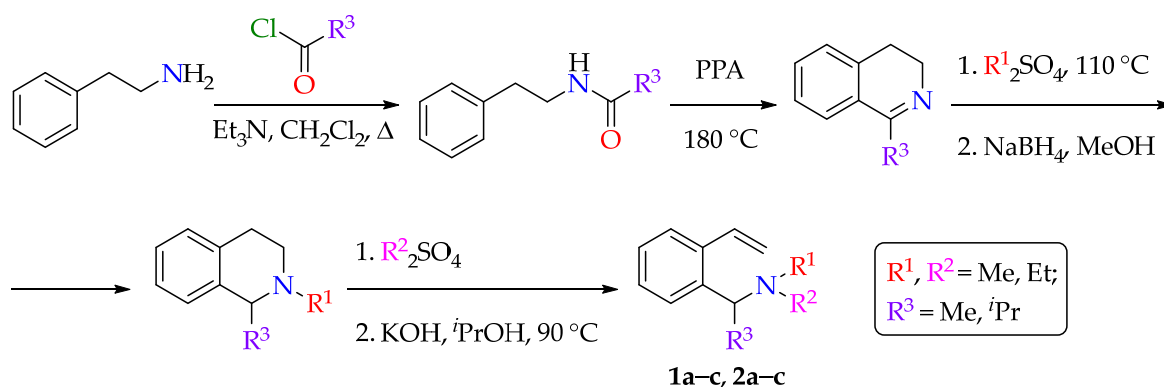

**Scheme S1.** Synthesis of 2-vinylbenzylamines **1a–c** and **2a–c**

1-Alkyl-3,4-dihydroisoquinoline (0.068 mol, 1 eqv.) was stirred with an equimolar amount of dialkyl sulfate (0.068 mol, 1 eqv.) in a two-necked flask (250 mL). The reaction vessel was heated at 110 °C for 1 h. After cooling, methanol (100 mL) was added into the flask. Then, NaBH<sub>4</sub> (0.68 mol, 10 eqv.) was portionwise added at 0 °C with vigorous stirring. The resulting reaction mixture was stirred at r.t. for 2 h. Then it was poured into ice-cold water (150 mL) and organic products were extracted with Et<sub>2</sub>O (2 × 150 mL). The combined organic layers were dried over anhydrous sodium sulfate. After filtration, the solvent was evaporated, and resulting viscous oil (THQ) was used at the next stage without additional purification.

An equimolar amount of dialkyl sulfate was added (0.067 mol, 1 eqv.) to 1,2-dialkyl-1,2,3,4-tetrahydroisoquinoline (0.067 mol, 1 eqv.) and the resulting mixture was stirred under reflux for 1 h. After cooling to r.t., the reaction mass solidified, isopropanol (50 mL) was added and a reaction vessel was heated at 90 °C for 20 min. At that temperature, pellets of KOH were portionwise added (0.13 mol, 2 eqv.) and the reaction mixture was stirred for another 1.5 h at 90 °C. After that, isopropanol was evaporated under reduced pressure, and the obtained slurry was diluted with water (100 mL) and extracted with Et<sub>2</sub>O (2 × 100 mL). The combined organic layers were dried over anhydrous sodium sulfate. After filtration, the solvent was evaporated and the resulting viscous oil was further purified by flash chromatography (*n*-hexane, SiO<sub>2</sub>).

### 1.1 *N,N*-Dimethyl-1-(2-vinylphenyl)ethan-1-amine (**1a**)

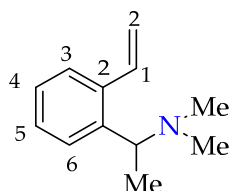

Pale-yellow oil, 3.90 g, 0.018 mol, yield 84%.

<sup>1</sup>H NMR (600 MHz, CDCl<sub>3</sub>) δ 7.44–7.43 (m, 2H, H-3,6-Ph), 7.25–7.19 (m, 3H, H-4,5-Ph, CH=CH<sub>2</sub>), 5.56 (dd, *J* = 1.5 and *J* = 17.2 Hz, 1H, H-2-*trans*), 5.27 (dd, *J* = 1.5 and *J* = 11.1 Hz, 1H, H-2-*cis*), 3.51 (q, *J* = 6.6 Hz, 1H, CHMe), 2.20 (s, 6H, 2 × Me<sub>2</sub>N), 1.30 (d, *J* = 6.6, 3H, MeCH) ppm. <sup>13</sup>C NMR (150 MHz, CDCl<sub>3</sub>) δ 142.5, 136.8, 135.2, 127.9, 127.0, 126.7, 126.3, 115.7, 62.0, 43.8 (2C), 20.00 ppm. IR spectrum: ν (C=C) 1640 cm<sup>-1</sup>. HRMS (MALDI-TOF) [M + H]<sup>+</sup> calcd for C<sub>12</sub>H<sub>17</sub>N: 176.1395, found: 176.1437.

### 1.2 *N*-Ethyl-*N*-methyl-1-(2-vinylphenyl)ethan-1-amine (1b)

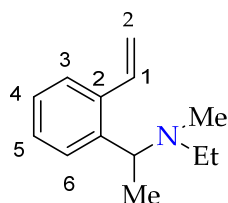

Pale-yellow oil, 3.24 g, 0.012 mol, yield 72%.

$^1\text{H}$  NMR (600 MHz,  $\text{CDCl}_3$ )  $\delta$  7.45–7.43 (m, 2H, H-3,6-Ph), 7.27–7.18 (m, 3H, H-4,5-Ph,  $\text{CH}=\text{CH}_2$ ), 5.56 (dd,  $J = 1.5$  and  $J = 17.7$  Hz, 1H, H-2-*trans*), 5.26 (dd,  $J = 1.5$  and  $J = 11.1$  Hz, 1H, H-2-*cis*), 3.76 (q,  $J = 6.6$  Hz, 1H,  $\text{CHMe}$ ), 2.54–2.49 (m, 1H,  $\text{CH}_2\text{Me}$ ), 2.38–2.32 (m, 1H,  $\text{CH}_2\text{Me}$ ), 2.20 (s, 3H,  $\text{MeN}$ ), 1.29 (d,  $J = 6.6$  Hz, 3H,  $\text{MeCH}$ ), 0.99 (t,  $J = 7.1$  Hz, 3H,  $\text{MeCH}_2$ ) ppm.  $^{13}\text{C}$  NMR (150 MHz,  $\text{CDCl}_3$ )  $\delta$  142.7, 137.0, 135.4, 127.8, 127.0, 126.7, 126.3, 115.6, 59.7, 48.7, 38.2, 18.9, 12.1 ppm. IR spectrum:  $\nu$  (C=C)  $1642\text{ cm}^{-1}$ . HRMS (ESI-TOF)  $[\text{M} + \text{H}]^+$  calcd for  $\text{C}_{13}\text{H}_{19}\text{N}$ : 190.1551, found: 190.1579.

### 1.3 *N,N*-Diethyl-1-(2-vinylphenyl)ethan-1-amine (1c)

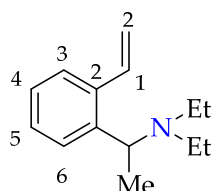

Pale-yellow oil, 3.55 g, 0.013 mol, yield 78%.

$^1\text{H}$  NMR (700 MHz,  $\text{CDCl}_3$ )  $\delta$  7.47 (br.d,  $J = 7.6$ , 1H, H-3-Ph), 7.44 (br.d,  $J = 7.6$ , 1H, H-6-Ph), 7.29 (dd,  $J = 11.0$  and  $J = 17.4$  Hz, 1H,  $\text{CH}=\text{CH}_2$ ), 7.24 (br.t,  $J = 7.6$  Hz, 1H, H-5-Ph), 7.20 (br.t,  $J = 7.6$  Hz, 1H, H-4-Ph), 5.57 (dd,  $J = 1.3$  and  $J = 17.4$  Hz, 1H, H-2-*trans*), 5.26 (dd,  $J = 1.3$  and  $J = 11.0$  Hz, 1H, H-2-*cis*), 4.03 (q,  $J = 6.7$  Hz, 1H,  $\text{CHMe}$ ), 2.64–2.54 (m, 4H,  $2 \times \text{CH}_2\text{Me}$ ), 1.28 (d,  $J = 6.7$  Hz, 3H,  $\text{MeCH}$ ), 0.95 (t,  $J = 7.2$  Hz, 6H,  $2 \times \text{MeCH}_2$ ) ppm.  $^{13}\text{C}$  NMR (150 MHz,  $\text{CDCl}_3$ )  $\delta$  143.1, 137.0, 135.4, 127.6, 127.1, 126.4, 126.1, 115.2, 56.2, 42.7 (2C), 18.8, 11.5 (2C) ppm. IR spectrum:  $\nu$  (C=C)  $1638\text{ cm}^{-1}$ . HRMS (ESI-TOF)  $[\text{M} + \text{H}]^+$  calcd for  $\text{C}_{14}\text{H}_{21}\text{N}$ : 204.1708, found: 204.1751.

### 1.4 *N,N*-Dimethyl-1-(2-vinylphenyl)propan-1-amine (2a)

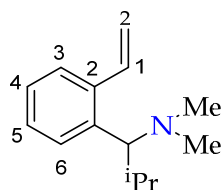

Pale-yellow oil, 2.12 g, 0.0055 mol, yield 53%.

$^1\text{H}$  NMR (600 MHz,  $\text{CDCl}_3$ )  $\delta$  7.45 (dd,  $J = 1.2$  and  $7.4$  Hz, 1H, H-3-Ph), 7.28–7.20 (m, 3H, H-4,5,6-Ph), 7.16 (dd,  $J = 11.1$  and  $J = 17.1$  Hz, 1H,  $\text{CH}=\text{CH}_2$ ), 5.52 (dd,  $J = 1.5$  and  $J = 17.1$  Hz, 1H, H-2-*trans*), 5.27 (dd,  $J = 1.5$  and  $J = 11.1$  Hz, 1H, H-2-*cis*), 3.48 (d,  $J = 8.1$  Hz, 1H,  $\text{CH}^i\text{Pr}$ ), 2.26–2.20 (m, 1H,  $\text{CH}(\text{Me})_2$ ), 2.13 (s, 6H,  $2 \times \text{Me}_2\text{N}$ ), 0.93 (d,  $J = 6.6$  Hz, 3H, A- $\text{MeCH}$ ), 0.75 (d,  $J = 7.1$  Hz, 3H, B- $\text{MeCH}$ ) ppm.  $^{13}\text{C}$  NMR (150 MHz,  $\text{CDCl}_3$ )  $\delta$  = 139.1, 136.2, 136.0, 128.1, 126.8, 126.5, 126.4, 115.9, 69.4, 42.4 (2C), 29.9, 20.6, 18.6 ppm. IR spectrum:  $\nu$  (C=C)  $1643\text{ cm}^{-1}$ . HRMS (MALDI-TOF)  $[\text{M} + \text{H}]^+$  calcd for  $\text{C}_{14}\text{H}_{21}\text{N}$ : 204.1708, found: 204.1738.

### 1.5 *N*-Ethyl-*N*-methyl-1-(2-vinylphenyl)propan-1-amine (2b)

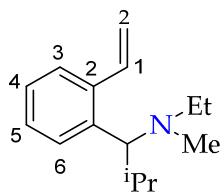

Pale-yellow oil, 2.31 g, 0.0045 mol, yield 42%.

$^1\text{H}$  NMR ( $\text{CDCl}_3$ , 600 MHz):  $\delta$  7.45 (br.d,  $J = 7.6$ , 1H, H-3-Ph), 7.27 (m, 1H, H-6-Ph), 7.24–7.14 (m, 3H, H-4,5-Ph,  $\text{CH}=\text{CH}_2$ ), 5.52 (dd,  $J = 17.2$  and 1.5 Hz, 1H, H-2-*trans*), 5.26 (dd,  $J = 10.6$  and 1.5 Hz, 1H, H-2-*cis*), 3.62 (d,  $J = 8.6$  Hz, 1H,  $\text{CH}^i\text{Pr}$ ), 2.48–2.43 (m, 1H,  $\text{CH}(\text{Me})_2$ ), 2.26–2.20 (m, 2H,  $\text{CH}_2\text{Me}$ ), 2.12 (s, 3H, N-Me), 0.98 (t,  $J = 7.2$  Hz, 3H,  $\text{MeCH}_2$ ), 0.96 (d,  $J = 6.6$  Hz, 3H, A-MeCH), 0.71 (d,  $J = 7.1$  Hz, 3H, B-MeCH) ppm.  $^{13}\text{C}$  NMR ( $\text{CDCl}_3$ , 176 MHz):  $\delta = 139.0$ , 136.8, 136.3, 128.0, 126.8, 126.40, 126.38, 115.9, 68.1, 47.2, 37.8, 29.8, 20.7, 19.0, 12.7 ppm. IR spectrum:  $\nu$  (C=C) 1645  $\text{cm}^{-1}$ . HRMS (MALDI-TOF)  $[\text{M} + \text{H}]^+$  calcd for  $\text{C}_{16}\text{H}_{25}\text{N}$ : 218.1864, found: 218.1914.

#### 1.6 *N,N*-Diethyl-1-(2-vinylphenyl)propan-1-amine (2c)

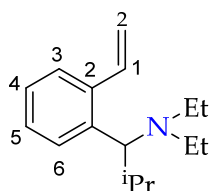

Pale-yellow oil, 2.27 g, 0.0049 mol, yield 50%.

$^1\text{H}$  NMR ( $\text{CDCl}_3$ , 600 MHz):  $\delta$  7.43 (br.d,  $J = 7.6$  Hz, 1H, H-3-Ph), 7.30 (br.d,  $J = 7.6$  Hz, 1H, H-6-Ph), 7.24–7.18 (m, 2H, H-4,5-Ph), 7.14 (dd,  $J = 10.8$  and  $J = 17.1$  Hz, 1H,  $\text{CH}=\text{CH}_2$ ), 5.52 (dd,  $J = 17.4$  and 1.4 Hz, 1H, H-2-*trans*), 5.26 (dd,  $J = 10.8$  and 1.4 Hz, 1H, H-2-*cis*), 3.72 (d,  $J = 8.8$  Hz, 1H,  $\text{CH}^i\text{Pr}$ ), 2.58 (dq,  $J = 7.2$  and 13.4 Hz, 2H,  $\text{CH}_2\text{Me}$ ), 2.26 (dq,  $J = 7.2$  and 13.4 Hz, 2H,  $\text{CH}_2\text{Me}$ ), 2.23–2.19 (m, 1H,  $\text{CH}(\text{Me})_2$ ), 0.96 (m, 9H, 2  $\times$   $\text{MeCH}_2\text{N}$ , A-MeCH), 0.70 (d,  $J = 6.7$  Hz, 3H, B-MeCH) ppm.  $^{13}\text{C}$  NMR ( $\text{CDCl}_3$ , 176 MHz):  $\delta = 139.0$ , 138.2, 136.4, 128.0, 126.8, 126.30, 126.28, 115.9, 64.5, 42.6 (2C), 29.9, 20.9, 19.4, 13.3 (2C) ppm. IR spectrum:  $\nu$  (C=C) 1646  $\text{cm}^{-1}$ . HRMS (MALDI-TOF)  $[\text{M} + \text{H}]^+$  calcd for  $\text{C}_{16}\text{H}_{25}\text{N}$ : 232.2021, found: 232.2045.

## 2. Synthesis of styrenes 3a–c

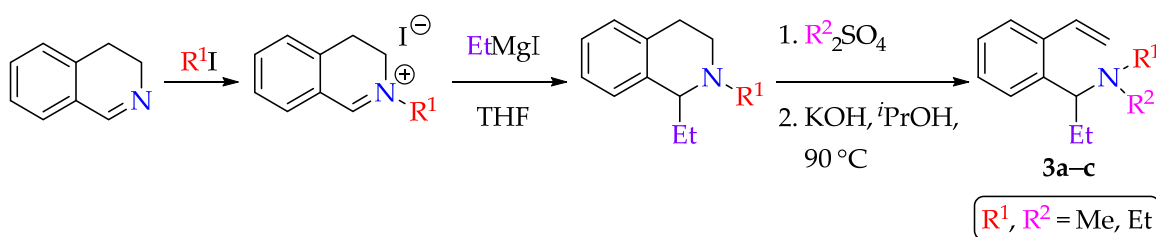

**Scheme S2.** Synthesis of  $\alpha$ -ethyl substituted styrenes 3a–c

3,4-Dihydroisoquinoline (5.00 g, 0.038 mol, 1 eqv.) was added dropwise to alkyl iodide (0.38 mol, 10 eqv.) pre-cooled to 0  $^{\circ}\text{C}$ . Then the reaction mixture was heated at 110  $^{\circ}\text{C}$  for 16 h. Obtained solid was filtered, washed with hexane (3  $\times$  50 mL), diethyl ether (3  $\times$  50 mL) and air-dried. The resulting

salt (0.0087 mol, 1 eqv.) was used in the next step (the Grignard synthesis) without further purification.

Grignard reagent (0.01 mol, 1.2 eqv.) was added to the salt dissolved in abs. THF (50 mL) at 0 °C under an argon atmosphere, stirred for an hour while cooling and further left stirred for two days at r.t. Then it was gently poured into cold water (100 mL) and extracted with Et<sub>2</sub>O (2 × 100 mL). The combined organic layers were dried over anhydrous sodium sulfate. After filtration, the solvent was evaporated and the resulting viscous oil (THQ) was used at the next stage without further purification.

1-Ethyl-2-alkyl-1,2,3,4-tetrahydroisoquinoline (0.0086 mol, 1 eqv.) was stirred with the corresponding dialkyl sulfate (0.0086 mol, 1 eqv.) for 1 h at 110 °C. Then the mixture was cooled to r.t., isopropanol (50 mL) and KOH (0.019 mol, 2.2 eqv.) were added and the reaction mixture was heated at 90 °C for 1.5 h. Then isopropanol was evaporated under reduced pressure to give a thick slurry. It was diluted with water (2 × 100 mL) and extracted with Et<sub>2</sub>O (3 × 100 mL). After that, the combined organic layers were dried over anhydrous sodium sulfate. After filtration, the solvent was evaporated to give light-yellow oil, which was purified by flash chromatography on silica gel (EtOAc : hexane - 1:10).

### 2.1 *N,N*-Dimethyl-1-(2-vinylphenyl)propan-1-amine (3a)

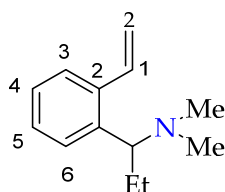

Pale-yellow oil, 3.02 g, 0.012 mol, yield 75%.

<sup>1</sup>H NMR (600 MHz, CDCl<sub>3</sub>) δ 7.45 (br.d, *J* = 7.6 Hz, 1H, H-3-Ph), 7.36 (br.d, *J* = 8.1 Hz, 1H, H-6-Ph), 7.25–7.20 (m, 3H, H-4,5-Ph, CH=CH<sub>2</sub>), 5.56 (dd, *J* = 1.5 and *J* = 17.7 Hz, 1H, H-2-*trans*), 5.26 (dd, *J* = 1.5 and *J* = 11.1 Hz, 1H, H-2-*cis*), 3.37 (dd, *J* = 4.0 and *J* = 9.6 Hz, 1H, CH<sub>2</sub>Et), 2.20 (s, 6H, Me<sub>2</sub>N), 1.94–1.90 (m, 1H, A-CH<sub>2</sub>Me), 1.73–1.68 (m, 1H, B-CH<sub>2</sub>Me), 0.65 (t, *J* = 7.1 Hz, 3H, MeCH<sub>2</sub>) ppm. <sup>13</sup>C NMR (150 MHz, CDCl<sub>3</sub>) δ 139.4, 138.0, 135.5, 127.7, 127.5, 126.7, 126.2, 115.6, 67.8, 43.7 (2C), 25.9, 10.3 ppm. IR spectrum: ν (C=C) 1639 cm<sup>-1</sup>. HRMS (MALDI-TOF) [M + H]<sup>+</sup> calcd for C<sub>13</sub>H<sub>19</sub>N: 190.1551, found: 190.1553.

### 2.2 *N*-Ethyl-*N*-methyl-1-(2-vinylphenyl)propan-1-amine (3b)

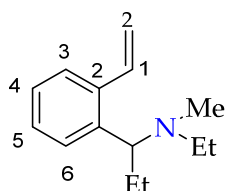

Pale-yellow oil, 3.59 g, 0.012 mol, yield 70%.

<sup>1</sup>H NMR (600 MHz, CDCl<sub>3</sub>) δ 7.45 (d, *J* = 7.6 Hz, 1H, H-3-Ph), 7.37 (d, *J* = 8.1 Hz, 1H, H-6-Ph), 7.26–7.18 (m, 3H, H-4,5-Ph, CH=CH<sub>2</sub>), 5.56 (dd, *J* = 1.5 and *J* = 17.2 Hz, 1H, H-2-*trans*), 5.25 (dd, *J* = 1.5 and *J* = 10.6 Hz, 1H, H-2-*cis*), 3.60 (dd, *J* = 4.0 and *J* = 9.6 Hz, 1H, CH<sub>2</sub>Et), 2.53–2.48 (m, 1H, A-NCH<sub>2</sub>Me), 2.38–2.33 (m, 1H, B-NCH<sub>2</sub>Me), 2.20 (s, 3H, MeN), 1.93–1.89 (m, 1H, CHCH<sub>2</sub>Me), 1.74–1.70 (m, 1H, CHCH<sub>2</sub>Me), 0.98 (t, *J* = 7.1 Hz, 3H, MeCH<sub>2</sub>N), 0.66 (t, *J* = 7.6 Hz, 3H, MeCH<sub>2</sub>CH) ppm. <sup>13</sup>C NMR (150 MHz, CDCl<sub>3</sub>) δ 139.8, 135.7, 127.9, 127.5, 126.7, 126.3, 125.3, 115.7, 64.6, 47.4, 37.3, 24.2, 10.9, 9.4 ppm.

IR spectrum:  $\nu$  (C=C) 1640  $\text{cm}^{-1}$ . HRMS (MALDI-TOF)  $[M + H]^+$  calcd for  $\text{C}_{14}\text{H}_{21}\text{N}$ : 204.1708, found: 204.1741.

### 2.3 *N,N*-Diethyl-1-(2-vinylphenyl)propan-1-amine (3c)

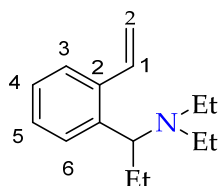

Pale-yellow oil, 3.32 g, 0.010 mol, yield 68%.

$^1\text{H}$  NMR (600 MHz,  $\text{CDCl}_3$ )  $\delta$  7.45 (br.d,  $J = 7.6$  Hz, 1H, H-3-Ph), 7.37 (br.d,  $J = 8.1$  Hz, 1H, H-6-Ph), 7.32–7.18 (m, 3H, H-4,5-Ph,  $\text{CH}=\text{CH}_2$ ), 5.56 (dd,  $J = 1.5$  and  $J = 17.7$  Hz, 1H, H-2-*trans*), 5.25 (dd,  $J = 1.5$  and  $J = 10.6$  Hz, 1H, H-2-*cis*), 3.84 (dd,  $J = 4.0$  and  $J = 9.6$  Hz, 1H,  $\text{CHEt}$ ), 2.64–2.51 (m, 4H,  $2 \times \text{NCH}_2\text{Me}$ ), 1.93–1.89 (m, 1H, A- $\text{CHCH}_2\text{Me}$ ), 1.72–1.66 (m, 1H, B- $\text{CHCH}_2\text{Me}$ ), 0.95 (t,  $J = 7.1$  Hz, 6H,  $2 \times \text{MeCH}_2\text{N}$ ), 0.65 (t,  $J = 7.1$  Hz, 3H,  $\text{MeCH}_2\text{CH}$ ) ppm.  $^{13}\text{C}$  NMR (150 MHz,  $\text{CDCl}_3$ )  $\delta$  139.4, 137.2, 134.8, 127.0, 126.3, 125.4, 125.0, 114.2, 61.5, 41.8 (2C), 24.3, 10.7 (2C), 9.7 ppm. IR spectrum:  $\nu$  (C=C) 1640  $\text{cm}^{-1}$ . HRMS (MALDI-TOF)  $[M + H]^+$  calcd for  $\text{C}_{15}\text{H}_{23}\text{N}$ : 218.1864, found: 218.1917.

### 3. Synthesis of styrenes 1d and 3d

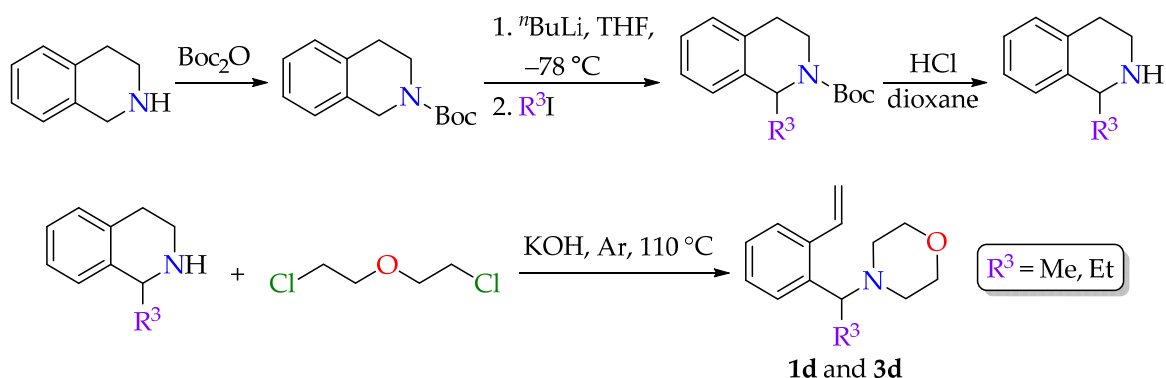

**Scheme S3.** Synthesis of styrenes **1d** and **3d**

A solution of 1,2,3,4-tetrahydroisoquinoline (13.32 g, 0.1 mol, 1 eqv.) in DCM (40 mL) was added dropwise for a period of 5 min to a solution of  $\text{Boc}_2\text{O}$  (24 g, 0.11 mol, 1.1 eqv.) in DCM (80 mL). The reaction mixture was stirred at r.t. for 2 h, then trifluoroacetic acid (2 mL) was added and the flask was placed in an ultrasonic bath for 10 min to remove an excess of  $\text{Boc}_2\text{O}$ . The solvent was evaporated under reduced pressure.

In a three-necked flask (250 mL), N-Boc-1,2,3,4-tetrahydroisoquinoline (10 g, 0.043 mol, 1 eqv.) was dissolved in abs. THF (100 mL) under an argon atmosphere. The reaction vessel was cooled to  $-60$  °C and a solution of *n*-butyllithium in hexane (26 mL, 2.5 M) was slowly added dropwise with vigorous stirring at the mentioned temperature. Then, the reaction was stirred at  $-60$  °C for 1 h. Alkyl iodide (0.13 mol, 3 eqv.) was added dropwise at  $-60$  °C and stirred at this temperature for additional 30 min. The reaction mixture was left to heat up to r.t. and then was stirred overnight at r.t. Methanol

(100 mL) and water (200 mL) were added and the resulting mixture was extracted with Et<sub>2</sub>O (2 x 200 mL). After that, the combined organic layers were dried over anhydrous sodium sulfate. After filtration, the solvent was evaporated under reduced pressure.

The obtained N-Boc-1-alkyl-1,2,3,4-tetrahydroisoquinoline (0.017 mol, 1 eqv.) was dissolved in dioxane (100 mL), then 20% HCl in dioxane (31 mL, 0.17 mol, 10 eqv.) was added. The reaction mixture was left to stir overnight. The solution was basified with an aqueous solution of NaOH to pH 12 and was extracted with Et<sub>2</sub>O (2 x 100 mL). The organic layers were dried over anhydrous sodium sulfate. After filtration, the solvent was evaporated under reduced pressure.

Without further purification a mixture of 1-alkyl-1,2,3,4-tetrahydroisoquinoline (0.02 mol, 1 eqv.), *bis*(chloroethyl) ether (3.29 g, 0.023 mol, 1.1 eqv.) and KOH (2.55 g, 0.045 mol, 2.3 eqv.) was heated without solvent under an inert atmosphere for 7 h at 110 °C. Then water (200 mL) was added, and the resulting solution was extracted with ethyl acetate (2 x 200 mL). The combined organic layers were dried over anhydrous sodium sulfate. After filtration, the solvent was evaporated under reduced pressure. The resulting light-yellow styrene (**1d** and **3d**) was purified by flash chromatography on silica gel (ethyl acetate : hexane - 1:10).

### 3.1 4-(1-(2-Vinylphenyl)ethyl)morpholine (**1d**)

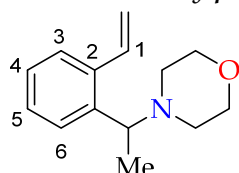

Pale-yellow oil, 1.72 g, 0.0067 mol, yield 85%.

<sup>1</sup>H NMR (600 MHz, CDCl<sub>3</sub>) δ 7.45 (m, 2H, H-3,6-Ph), 7.27 (dd, *J* = 11.1 and 17.2 Hz, 1H, CH=CH<sub>2</sub>), 7.25 and 7.21 (dt and dt, 1H and 1H, *J* = 1.5 and 7.6 Hz, H-4-Ph and H-5-Ph), 5.56 (dd, *J* = 1.5 and *J* = 17.2 Hz, 1H, H-2-*trans*), 5.27 (dd, *J* = 1.5 and *J* = 11.1 Hz, 1H, H-2-*cis*), 3.70–3.63 (m, 4H, CH<sub>2</sub>OCH<sub>2</sub>), 3.61 (q, 1H, *J* = 6.6 Hz, CHMe), 2.50 (br.m, 2H, NCH<sub>2</sub>), 2.37–2.34 (m, 2H, NCH<sub>2</sub>), 1.29 (d, *J* = 6.6 Hz, 3H, CHMe) ppm. <sup>13</sup>C NMR (150 MHz, CDCl<sub>3</sub>) δ 141.6, 137.0, 135.1, 127.8, 127.2, 126.8, 126.3, 115.6, 67.2 (2C), 61.4, 51.4 (2C), 19.1 ppm. IR spectrum: ν (C=C) 1630 cm<sup>-1</sup>. HRMS (MALDI-TOF) [M + H]<sup>+</sup> calcd for C<sub>14</sub>H<sub>19</sub>NO: 218.1500, found: 218.1553.

### 3.2 4-(1-(2-Vinylphenyl)propyl)morpholine (**3d**)

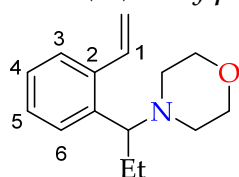

Pale-yellow oil, 1.59 g, 0.0056 mol, yield 81%.

<sup>1</sup>H NMR (600 MHz, CDCl<sub>3</sub>) δ 7.45 (dd, *J* = 1.5 and *J* = 7.6 Hz, 1H, H-3-Ph), 7.36 (br.d, *J* = 7.6 Hz, 1H, H-6-Ph), 7.28–7.19 (m, 3H, H-4,5-Ph, CH=CH<sub>2</sub>), 5.55 (dd, *J* = 1.5 and *J* = 17.7 Hz, 1H, H-2-*trans*), 5.26 (dd, *J* = 1.5 and *J* = 11.1 Hz, 1H, H-2-*cis*), 3.69–3.63 (m, 4H, CH<sub>2</sub>OCH<sub>2</sub>), 3.46 (dd, *J* = 4.0 and *J* = 9.1 Hz, 1H, CHEt), 2.51 (m, 2H, A-NCH<sub>2</sub>), 2.37–2.32 (m, 2H, B-NCH<sub>2</sub>), 1.93–1.89 (m, 1H, A-CHCH<sub>2</sub>Me), 1.71–1.67 (m, 1H, B-CHCH<sub>2</sub>Me), 0.64 (t, *J* = 7.6 Hz, 3H, CH<sub>2</sub>Me) ppm. <sup>13</sup>C NMR (150 MHz, CDCl<sub>3</sub>) δ 138.8, 138.1, 135.5, 128.3, 127.5, 126.8, 126.3, 115.6, 67.3 (2C), 51.7 (2C), 51.6, 24.8, 10.1 ppm. IR spectrum: ν (C=C) 1628 cm<sup>-1</sup>. HRMS (MALDI-TOF) [M + H]<sup>+</sup> calcd for C<sub>15</sub>H<sub>21</sub>NO: 232.1657, found: 232.1703.



#### 4. Optimization of conditions for complexes 4 and 5 preparation

The initial conditions were chosen on the basis of the previous experiments [1] and proved to be suitable for obtaining chelates **4a–c**. However,  $\alpha$ -ethyl or  $\alpha$ -isopropyl substituted catalysts (**2a** and **3a**) could not be isolated by this way.

In this regard, we changed the solvent system. It is known that **Ind II** is highly soluble in toluene and poorly soluble in nonpolar solvents, while target catalysts precipitate much more efficiently from nonpolar solvents such as heptane. Initially, we carried out the reaction in pure heptane at reflux. However, **Ind II** did not dissolve entirely, so these conditions turned out to be unsuitable. Subsequently, the ratios of toluene and heptane were selected such at which **Ind II** was dissolved and the target catalysts were precipitated after cooling. Thus, the ratio of 1:5 (toluene - heptane, respectively) at 110 °C turned out to be the optimal. It should be noted, that catalysts **6** with an isopropyl group in the alpha-position could not be isolated, although they existed in solutions, which was confirmed by TLC. These complexes are precipitated reluctantly on cooling and dissolve even in ice-cold pentane when trying to separate them from the starting materials.

**Table S1.** Screening of conditions for synthesis of catalysts **4**, **5** and **6**.

| Conditions                 | Styrene     | Catalyst    | Time, min | Yield, % |
|----------------------------|-------------|-------------|-----------|----------|
| PhMe, 110 °C               | <b>1a–c</b> | <b>4a–c</b> | 90        | > 62     |
|                            | <b>2a</b>   | <b>6a</b>   | 90        | –*       |
|                            | <b>2a</b>   | <b>6a</b>   | 120       | –*       |
|                            | <b>3a</b>   | <b>5a</b>   | 90        | traces   |
|                            | <b>3a</b>   | <b>5a</b>   | 120       | traces   |
| heptane, 90 °C             | <b>2a</b>   | <b>6a</b>   | 90        | 0        |
|                            | <b>3a</b>   | <b>5a</b>   | 90        | 0        |
| PhMe:heptane (1:1), 90 °C  | <b>2a</b>   | <b>6a</b>   | 90        | –*       |
|                            | <b>3a</b>   | <b>5a</b>   | 90        | 15       |
|                            | <b>3a</b>   | <b>5a</b>   | 120       | 18       |
| PhMe:heptane (1:3), 90 °C  | <b>2a</b>   | <b>6a</b>   | 90        | –*       |
|                            | <b>3a</b>   | <b>5a</b>   | 90        | 27       |
| PhMe:heptane (1:5), 90 °C  | <b>2a</b>   | <b>6a</b>   | 90        | –*       |
|                            | <b>3a</b>   | <b>5a</b>   | 90        | 30       |
| PhMe:heptane (1:5), 110 °C | <b>1a–c</b> | <b>4a–c</b> | 90        | > 70     |
|                            | <b>2a</b>   | <b>6a</b>   | 90        | –*       |
|                            | <b>3a</b>   | <b>5a</b>   | 90        | 74       |
| PhMe:heptane (1:7), 110 °C | <b>2a</b>   | <b>6a</b>   | 90        | –*       |
|                            | <b>3a</b>   | <b>5a</b>   | 90        | 20       |

\* We were unable to isolated complex **6a**, but its formation was proved by TLC

## 5. General procedure for synthesis of complexes 4 and 5

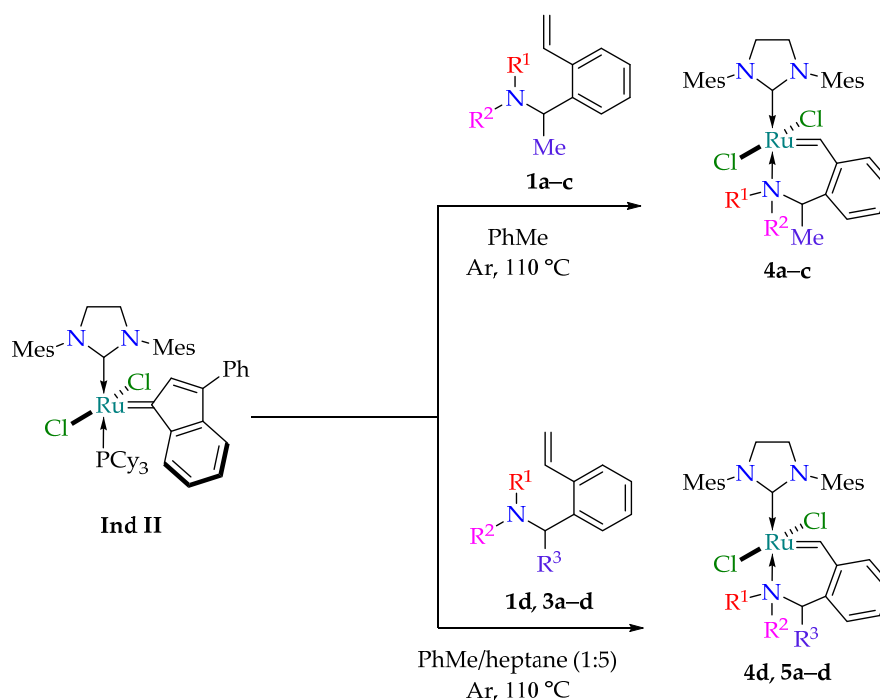

**Scheme S4.** Synthesis of ruthenium complexes **4a-d** and **5a-d**

In a Schlenk flask, the precursor of ruthenium complexes **IndII** (500 mg, 0.53 mmol, 1.0 eqv.) was suspended in abs. toluene (in the case of **1a-c**) or in a mixture of absolute heptane and toluene (V:V, 5:1) (in the case of **4d, 5a-d**) (15 mL) under an argon atmosphere. Then, the reaction mixture was heated to 110 °C with continuous stirring and styrene **1, 2** or **3** (0.58 mmol, 1.1 eqv.) was added in an argon stream. After that, the flask was sealed with a screw cap and heated at 110 °C for 1 h (40 min for **1d, 3d**). After cooling to r.t., solvents were removed under reduced pressure, and 10 mL of cool pentane (−20 °C) were added to the obtained solid. Particulate was filtered off and washed with hexane (3 × 5 mL) and with methanol (3 × 3 mL), both cooled to −20 °C to give the target catalyst (**4a-d, 5a-d**) as a green powder after drying under vacuum.

### 5.1 [1,3-Bis(2,4,6-trimethylphenyl)imidazolin-2-ylidene](dichloro){2-[(dimethylamino)-1-ethyl]benzylidene}ruthenium (**4a**)

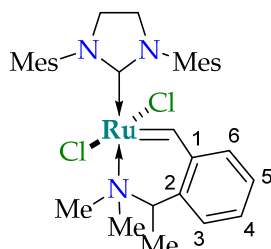

Green powder, 264 mg, 0.41 mmol, 78%, m.p. 203.1–203.5 °C.

<sup>1</sup>H NMR (300.1 MHz, CD<sub>2</sub>Cl<sub>2</sub>, 30 °C) δ 18.76 (s, 1H, CH= Ru), 7.59 (br.t, *J* = 7.4 Hz, 1H, H-4-C<sub>6</sub>H<sub>4</sub>), 7.25–7.20 (m, 2H, H-3-C<sub>6</sub>H<sub>4</sub> and H-5-C<sub>6</sub>H<sub>4</sub>), 7.11 and 7.05 (br.s and br.s, 2H and 2H, CH-3,5-Mes), 6.77 (d, *J* = 7.4 Hz, 1H, H-6-C<sub>6</sub>H<sub>4</sub>), 5.74 (q, *J* = 7.1 Hz, 1H, NCHMe), 4.12 (s, 4H, NCH<sub>2</sub>CH<sub>2</sub>N), 2.58 and 2.44 (br.s and br.s, 9H and 9H, Me-Mes), 2.07 (s, 3H, A-MeN), 1.54 (s, 3H, B-MeN), 1.40 (d, *J* = 7.1 Hz, 3H,

MeCH).  $^{13}\text{C}$  NMR (150.9 MHz,  $\text{CDCl}_3$ , 25  $^\circ\text{C}$ )  $\delta$  312.2, 213.1, 148.8, 138.8 (br.s), 138.4, 137.2, 136.3 (very br.s), 129.2, 129.0, 128.4, 128.3, 127.0, 59.0, 51.5 (br.s), 43.2, 38.5, 20.8, 19.4 (very br.s), 9.6.

IR spectrum : 2953, 1620, 1593, 1417, 1310, 1264, 1190, 1031, 874, 815, 788.

HRMS (ESI-TOF)  $[\text{M}]^+$  calcd. for  $\text{C}_{32}\text{H}_{41}\text{Cl}_2\text{N}_3\text{Ru}$  639.1716, found 639.1727.

### 5.2 [1,3-Bis(2,4,6-trimethylphenyl)imidazolin-2-ylidene](dichloro){2-[(methylethylamino)-1-ethyl]benzylidene}ruthenium (4b)

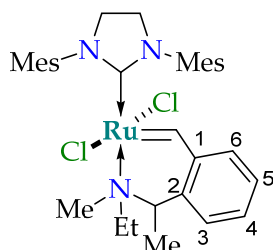

Green powder, 274 mg, 0.42 mmol, 79%, m.p. 202.8–203.2  $^\circ\text{C}$ .

$^1\text{H}$  NMR (600.2 MHz,  $\text{CDCl}_3$ , 23  $^\circ\text{C}$ )  $\delta$  18.83 (s, 1H,  $\text{CH}=\text{Ru}$ ), 7.48 (t,  $J = 7.6$  Hz, 1H, H-4- $\text{C}_6\text{H}_4$ ), 7.15 (d,  $J = 7.6$  Hz, 1H, H-5- $\text{C}_6\text{H}_4$ ), 7.11 (br.s, 1H, H-Mes), 7.10 (t,  $J = 7.6$  Hz, 1H, H-3- $\text{C}_6\text{H}_4$ ), 7.02 (very br.s, 2H,  $\text{CH}-3,5\text{-Mes}$ ), 6.91 (br.s, 1H,  $\text{CH}-\text{Mes}$ ), 6.54 (d,  $J = 7.6$  Hz, 1H, H-6- $\text{C}_6\text{H}_4$ ), 5.51 (q,  $J = 6.9$  Hz, 1H,  $\text{NCHMe}$ ), 4.12–3.94 (m, 4H,  $\text{NCH}_2\text{CH}_2\text{N}$ ), 3.33–3.30 (m, 1H, A- $\text{CH}_2\text{Me}$ ), 2.77 (br.s, 3H, Me-Mes), 2.63 (br.s, 3H, Me-Mes), 2.53 (br.s, 3H, Me-Mes), 2.42 (br.s, 3H, Me-Mes), 2.33 (br.s, 3H, Me-Mes), 2.24–2.18 (m, 1H, B- $\text{CH}_2\text{Me}$ ), 2.10 (br.s, 3H, Me-Mes), 1.57 (s, 3H, MeN), 1.34 (d,  $J = 6.9$  Hz, 3H, MeCH), 0.60 (t,  $J = 7.1$  Hz, 3H, MeCH}\_2\text{N}).  $^{13}\text{C}$  NMR (150.9 MHz,  $\text{CDCl}_3$ , 23  $^\circ\text{C}$ )  $\delta$  315.1, 211.8, 149.1, 139.9, 138.7, 138.1, 137.9, 137.7, 136.2, 135.3, 129.7, 129.4, 129.3, 129.2, 128.5, 128.3, 128.0, 126.2, 60.6, 54.3, 52.2 (br.s), 50.8 (br.s), 36.4, 21.1 (br.s, 2C), 20.5 (br.s), 20.5 (br.s), 18.5 (br.s), 18.0 (br.s), 11.7, 9.7.

$^1\text{H}$  NMR (500.1 MHz,  $\text{CD}_2\text{Cl}_2$ , 25  $^\circ\text{C}$ )  $\delta$  18.85 (s, 1H,  $\text{CH}=\text{Ru}$ ), 7.59 (t,  $J = 7.6$  Hz, 1H, H-4- $\text{C}_6\text{H}_4$ ), 7.23–7.19 (m, 3H, H-3,5- $\text{C}_6\text{H}_4$  and  $\text{CH}-\text{Mes}$ ), 7.05 (very br.s, 3H,  $\text{CH}-\text{Mes}$ ), 6.60 (d,  $J = 7.6$  Hz, 1H, H-6- $\text{C}_6\text{H}_4$ ), 5.49 (q,  $J = 6.9$  Hz, 1H,  $\text{NCHMe}$ ), 4.10–3.97 (m, 4H,  $\text{NCH}_2\text{CH}_2\text{N}$ ), 3.32–3.25 (m, 1H, A- $\text{CH}_2\text{Me}$ ), 2.76 (br.s, 3H, Me-Mes), 2.62 (br.s, 3H, Me-Mes), 2.54 (br.s, 3H, Me-Mes), 2.45 (br.s, 3H, Me-Mes), 2.38 (br.s, 3H, Me-Mes), 2.26–2.20 (m, 1H, B- $\text{CH}_2\text{Me}$ ), 2.13 (br.s, 3H, Me-Mes), 1.56 (s, 3H, MeN), 1.38 (d,  $J = 6.9$  Hz, 3H, MeCH), 0.61 (t,  $J = 7.1$  Hz, 3H, MeCH}\_2\text{N}).  $^{13}\text{C}$  NMR (125.8 MHz,  $\text{CD}_2\text{Cl}_2$ , 25  $^\circ\text{C}$ )  $\delta$  313.6, 211.3, 149.3, 139.9, 138.7, 138.4, 137.7, 136.2, 135.4, 129.6, 129.4, 129.2, 129.1, 128.8, 128.2, 128.2, 125.6, 60.5, 54.2, 52.2, 50.9, 36.2, 31.9, 31.6, 22.6, 20.8, 20.3, 20.1, 19.4, 18.3, 17.8, 11.3, 9.37.

IR spectrum: 2945, 1610, 1598, 1444, 1306, 1257, 1181, 1026, 872, 816  $\text{cm}^{-1}$ .

HRMS (ESI-TOF)  $[\text{M}]^+$  calcd. for  $\text{C}_{33}\text{H}_{43}\text{Cl}_2\text{N}_3\text{Ru}$  667.2029, found 667.2042.

### 5.3 [1,3-Bis(2,4,6-trimethylphenyl)imidazolin-2-ylidene](dichloro){2-[(diethylamino)-1-ethyl]benzylidene}ruthenium (4c)

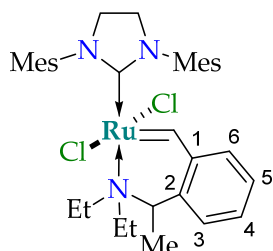

Green powder, 251 mg, 0.38 mmol, 71%, m.p. 203.7–204.1  $^\circ\text{C}$ .

$^1\text{H}$  NMR (600.2 MHz,  $\text{CDCl}_3$ , 22  $^\circ\text{C}$ )  $\delta$  18.74 (s, 1H,  $\text{CH}=\text{Ru}$ ), 7.46 (t,  $J = 7.8$  Hz, 1H, H-4- $\text{C}_6\text{H}_4$ ), 7.19 (d,  $J = 7.8$  Hz, 1H, H-5- $\text{C}_6\text{H}_4$ ), 7.15 (br.s, 1H,  $\text{CH}-\text{Mes}$ ), 7.09 (t,  $J = 7.8$  Hz, 1H, H-3- $\text{C}_6\text{H}_4$ ), 7.04 (br.s, 1H,

CH-Mes), 7.02 (br.s, 1H, CH-Mes), 6.93 (br.s, 1H, CH-Mes), 6.46 (d,  $J = 7.8$  Hz, 1H, H-6-C<sub>6</sub>H<sub>4</sub>), 5.36 (very br.s, 1H, NCHMe), 4.15–3.93 (m, 4H, NCH<sub>2</sub>CH<sub>2</sub>N), 3.46–3.43 (m, 1H, A-CH<sub>2</sub>Me), 2.83 (br.s, 3H, Me-Mes), 2.71 (br.s, 3H, Me-Mes), 2.70–2.65 (m, 1H, B-CH<sub>2</sub>Me), 2.49 (br.s, 3H, Me-Mes), 2.43 (br.s, 3H, Me-Mes), 2.33 (br.s, 3H, Me-Mes), 2.22–2.12 (m, 2H, CH<sub>2</sub>Me), 2.05 (br.s, 3H, Me-Mes), 1.40 (d,  $J = 6.8$  Hz, 3H, MeCH), 0.63 (t,  $J = 7.6$  Hz, 3H, MeCH<sub>2</sub>N), 0.32 (t,  $J = 7.6$  Hz, 3H, MeCH<sub>2</sub>N). <sup>13</sup>C NMR (150.9 MHz, CDCl<sub>3</sub>, 22 °C)  $\delta$  316.2, 211.9, 149.7, 140.0, 139.7, 138.7, 138.1 (2C), 137.8, 137.73, 137.68, 135.3, 129.7, 129.4, 129.3, 129.2, 128.5, 127.6, 127.3, 124.9 (very br.s), 60.9, 52.1, 51.1, 50.8, 44.6, 21.0, 20.9, 20.6, 20.3, 18.7, 18.0, 13.6 (very br.s), 12.5, 10.6 (br.s).

IR spectrum: 2957, 1610, 1595, 1436, 1306, 1258, 1186, 1027, 862, 810 cm<sup>-1</sup>.

HRMS (ESI-TOF) [M-Cl]<sup>+</sup> calcd. for C<sub>34</sub>H<sub>45</sub>Cl<sub>2</sub>N<sub>3</sub>Ru 631.7569, found 631.7566.

#### 5.4 [1,3-Bis(2,4,6-trimethylphenyl)imidazolidin-2-ylidene](dichloro)[2-(morpholin-4-ylethyl)benzylidene]ruthenium (4d)

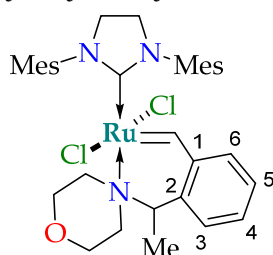

Green powder, 289 mg, 0.42 mmol, 80%, m.p. 204.6–204.9 °C.

<sup>1</sup>H NMR (600.2 MHz, CDCl<sub>3</sub>, 25 °C)  $\delta$  18.98 (s, 1H, CH=Ru), 7.20 (t,  $J = 7.6$  Hz, 1H, H-4-C<sub>6</sub>H<sub>4</sub>), 7.14 (t,  $J = 7.6$  Hz, 1H, H-5-C<sub>6</sub>H<sub>4</sub>), 7.12–7.11 (m, 4H, CH-3,5-Mes and H-3-C<sub>6</sub>H<sub>4</sub>), 7.03 (br.s, 1H, CH-Mes), 6.98 (d,  $J = 7.6$  Hz, 1H, H-6-C<sub>6</sub>H<sub>4</sub>), 6.30 (d,  $J = 7.1$  Hz, 1H, NCHMe), 4.24–3.94 (m, 4H, NCH<sub>2</sub>CH<sub>2</sub>N), 3.52 (m, 2H, H-Morph), 3.34 (br.d,  $J \sim 12.6$  Hz, 1H, H-Morph), 3.13 (br.d,  $J \sim 10.1$  Hz, 1H, H-Morph), 2.68 (br.s, 3H, Me-Mes), 2.77 (br.s, 3H, Me-Mes), 2.55 (m, 1H, H-Morph), 2.41 (s, 3H, Me-Mes), 2.36 (br.s, 6H, 2 × Me-Mes), 2.18 (br.s, 3H, Me-Mes), 2.03–1.97 (m, 1H, H-Morph), 1.60 (br.m, 3H, H-Morph), 0.72 (d,  $J = 7.1$  Hz, 3H, NCHMe). <sup>13</sup>C NMR (150.9 MHz, CDCl<sub>3</sub>, 25 °C)  $\delta$  324.4, 211.0, 156.7, 140.4, 139.8, 139.6, 138.5, 138.0, 137.7, 137.0, 134.6 (br.s), 133.8, 129.8, 129.52, 129.49, 129.3, 127.9, 127.7 (very br.s), 127.3, 111.0, 71.8 (br.s), 67.3, 65.5, 58.6 (br.s), 53.1 (br.s), 52.2, 50.5, 31.7, 21.3 (br.s), 21.1, 20.9, 21.8, 20.3, 18.8, 18.2.

IR spectrum: 2947, 1615, 1590, 1420, 1305, 1257, 1187, 1033, 869, 817 cm<sup>-1</sup>.

HRMS (ESI-TOF) [M-Cl]<sup>+</sup> calcd. for C<sub>34</sub>H<sub>43</sub>Cl<sub>2</sub>N<sub>3</sub>ORu 645.7361, found 645.7358.

#### 5.5 [1,3-Bis(2,4,6-trimethylphenyl)imidazolin-2-ylidene](dichloro){2-[(dimethylamino)-1-propyl]benzylidene}ruthenium (5a)

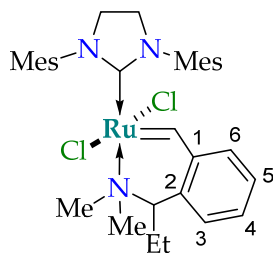

Green powder, 256 mg, 0.39 mmol, 74%, m.p. 202.3–202.7 °C.

<sup>1</sup>H NMR (600.2 MHz, CDCl<sub>3</sub>, 25 °C)  $\delta$  18.91 (s, 1H, CH=Ru), 7.50 (t,  $J = 7.6$  Hz, 1H, H-4-C<sub>6</sub>H<sub>4</sub>), 7.16–7.03 (m, 6H, H-3-C<sub>6</sub>H<sub>4</sub>, H-5-C<sub>6</sub>H<sub>4</sub>, H-Mes), 6.70 (d,  $J = 7.1$  Hz, 1H, H-6-C<sub>6</sub>H<sub>4</sub>), 5.15–5.10 (br.s, 1H, NCH<sub>2</sub>Et), 4.10 (br.s, 4H, NCH<sub>2</sub>CH<sub>2</sub>N), 2.80–2.30 (m, 15H, Me-Mes), 2.01 (s, 3H, Me-Mes), 1.91–1.87 (m, 2H,

CH<sub>2</sub>Me), 1.59-154 (m, 6H, Me<sub>2</sub>N), 1.05 (m, 3H, MeCH<sub>2</sub>CH). <sup>13</sup>C NMR (150.9 MHz, CD<sub>2</sub>Cl<sub>2</sub>, 25 °C) δ 314.2, 213.3, 149.5, 139.7, 138.5, 135.6, 129.4, 129.4, 129.4, 129.3, 129.3, 129.3, 129.2, 128.6, 128.6, 128.3, 128.2, 128.2, 127.7, 126.9, 66.8, 52.2, 51.2, 43.7, 40.5, 21.2, 21.0, 20.9, 18.9, 18.9, 17.2, 17.2, 13.2.

IR spectrum: 2924, 1929, 1606, 1478, 1261, 748, 591, 582 cm<sup>-1</sup>.

HRMS (ESI-TOF) [M]<sup>+</sup> calcd. for C<sub>33</sub>H<sub>43</sub>Cl<sub>2</sub>N<sub>3</sub>Ru 667.2029, found 667.2035.

**5.6 [1,3-Bis(2,4,6-trimethylphenyl)imidazolin-2-ylidene](dichloro){2-[(methylethylamino)-1-propyl]benzylidene}ruthenium (5b)**

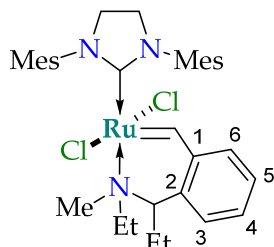

Green powder, 205 mg, 0.31 mmol, 58%, m.p. 202.1–204.5 °C.

<sup>1</sup>H NMR (600.2 MHz, CDCl<sub>3</sub>, 25 °C) δ 18.91 (s, 1H, CH=Ru), 7.49 (t, *J* = 7.6 Hz, 1H, H-4-C<sub>6</sub>H<sub>4</sub>), 7.15–7.12 (m, 3H, H-3-C<sub>6</sub>H<sub>4</sub>, H-5-C<sub>6</sub>H<sub>4</sub> and H-Mes), 7.05 (br.s, 1H, H-Mes), 7.01 (br.s, 1H, H-Mes), 6.97 (br.s, 1H, H-Mes), 6.52 (d, *J* = 7.1 Hz, 1H, H-6-C<sub>6</sub>H<sub>4</sub>), 4.99 (d, *J* = 10.1 Hz, 1H, NCH<sub>2</sub>Et), 4.10–3.97 (m, 4H, NCH<sub>2</sub>CH<sub>2</sub>N), 3.25–3.22 (m, 1H, N-A-CH<sub>2</sub>Me), 2.73 (br. s, 3H, Me-Mes), 2.58 (br. s, 6H, Me-Mes), 2.44 (br. s, 3H, Me-Mes), 2.34 (br. s, 3H, Me-Mes), 2.23 (br.s, 3H, Me-Mes), 2.30–2.26 (m, 1H, N-B-CH<sub>2</sub>Me), 2.00–1.97 (m, 1H, CH-A-CH<sub>2</sub>Me), 1.83–1.80 (m, 1H, CH-B-CH<sub>2</sub>Me), 1.64 (m, 3H, MeN), 0.97 (m, 3H, MeCH<sub>2</sub>N), 0.67 (m, 3H, MeCH<sub>2</sub>CH). <sup>13</sup>C NMR (150.9 MHz, CD<sub>2</sub>Cl<sub>2</sub>, 25 °C) δ 315.8, 211.3, 151.0, 140.0, 139.6, 138.6, 138.1, 137.7, 135.4, 133.7, 129.6, 129.7, 129.4, 129.2, 129.2, 128.8, 128.1, 128.0, 127.8, 126.4, 124.5, 67.6, 54.0, 52.2, 50.8, 38.0, 21.0, 20.3, 18.5, 18.1, 15.7, 12.7, 10.9.

IR spectrum: 2952, 1600, 1590, 1428, 1305, 1255, 1183, 1028, 871, 812 cm<sup>-1</sup>.

HRMS (ESI-TOF) [M]<sup>+</sup> calcd. for C<sub>34</sub>H<sub>45</sub>Cl<sub>2</sub>N<sub>3</sub>Ru 631.7569, found 631.7565.

**5.7 [1,3-Bis(2,4,6-trimethylphenyl)imidazolin-2-ylidene](dichloro){2-[(diethylamino)-1-propyl]benzylidene}ruthenium (5c)**

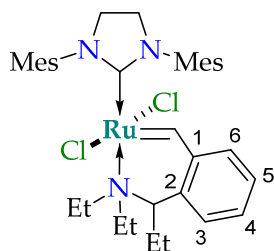

Green powder, 18 mg, 0.03 mmol, 5%.

<sup>1</sup>H NMR (600.2 MHz, CDCl<sub>3</sub>, 25 °C) δ 18.82 (s, 1H, CH=Ru), 7.40 (t, *J* = 7.6 Hz, 1H, H-4-C<sub>6</sub>H<sub>4</sub>), 7.06 (m, 1H, H-3-C<sub>6</sub>H<sub>4</sub>), 7.04 (m, 1H, H-5-C<sub>6</sub>H<sub>4</sub>), 7.02–6.82 (m, 4H, H-3,5-Mes), 6.44 (d, *J* = 7.1 Hz, H-6-C<sub>6</sub>H<sub>4</sub>), 4.91 (d, *J* = 10.1 Hz, 1H, α-CHN), 4.05–3.70 (m, 4H, NCH<sub>2</sub>CH<sub>2</sub>N), 3.17–3.13 (m, 1H, N-A-CH<sub>2</sub>Me), 2.65 (br. s, 3H, Me-4-Mes), 2.51 (m, 1H, N-B-CH<sub>2</sub>Me), 2.49 (br. s, 6H, Me-2,4-Mes), 2.35 (br. s, 3H, Me-2-Mes), 2.25 (br. s, 3H, Me-6-Mes), 2.19 (m, 2H, NCH<sub>2</sub>Me), 2.15 (br. s, 3H, Me-6-Mes), 1.90 (m, 1H, CH-A-CH<sub>2</sub>Me), 1.73 (m, 1H, CH-B-CH<sub>2</sub>Me), 1.55 (s, 3H, MeCH<sub>2</sub>N), 0.89 (t, *J* = 7.6 Hz, 3H, MeCH<sub>2</sub>N), 0.58 (t, *J* = 7.6 Hz, 3H, MeCH<sub>2</sub>CH). <sup>13</sup>C NMR (150.9 MHz, CD<sub>2</sub>Cl<sub>2</sub>, 25 °C) δ 314.4, 211.5, 151.2, 133.9, 129.8, 129.7, 129.6, 129.6, 129.4, 129.4, 129.4, 129.0, 128.2, 128.2, 128.1, 128.1, 128.0, 127.0, 124.7, 67.8, 67.8, 56.2, 54.1, 52.4, 44.5, 38.2, 21.1, 20.5, 18.7, 18.5, 15.9, 14.2, 12.9, 11.1.

IR spectrum: 2959, 1606, 1586, 1408, 1314, 1259, 1190, 1028, 872, 813  $\text{cm}^{-1}$ .

HRMS (ESI-TOF)  $[\text{M}]^+$  calcd. for  $\text{C}_{35}\text{H}_{47}\text{Cl}_2\text{N}_3\text{Ru}$  681.2185, found 681.2193.

**5.8 [1,3-Bis(2,4,6-trimethylphenyl)imidazolidin-2-ylidene](dichloro)[2-(morpholin-4-ylpropyl)benzylidene]ruthenium (5d)**

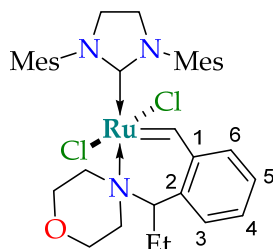

Green powder, 284 mg, 0.41 mmol, 77%, m.p. 204.2–204.6  $^{\circ}\text{C}$ .

$^1\text{H}$  NMR (600.2 MHz,  $\text{CDCl}_3$ , 25  $^{\circ}\text{C}$ )  $\delta$  19.10 (s, 1H,  $\text{CH}=\text{Ru}$ ), 7.41 (m, 1H, H-4- $\text{C}_6\text{H}_4$ ), 7.27–7.08 (m, 6H, H- $\text{C}_6\text{H}_4$  and  $\text{CH}=\text{Mes}$ ), 6.44 (d,  $J = 7.1$  Hz, 1H, H- $\text{C}_6\text{H}_4$ ), 4.36–4.09 (m, 5H,  $\text{NCH}_2\text{Et}$  and  $\text{NCH}_2\text{CH}_2\text{N}$ ), 3.80–3.66 (m, 2H, H-Morph), 3.46 (d,  $J = 12.6$  Hz, 1H, H-Morph), 3.40 (d,  $J = 10.6$  Hz, 1H, H-Morph), 3.05 (br.s, 3H, Me-Mes), 2.94 (br.s, 3H, Me-Mes), 2.66–2.55 (m, 1H, H-Morph), 2.56 (s, 3H, Me-Mes), 2.51 (s, 3H, Me-Mes), 2.49 (s, 3H, Me-Mes), 2.32 (s, 3H, Me-Mes), 2.16–2.13 (m, 1H,  $\text{CH}_2\text{Me}$ ), 1.79–1.72 (m, 1H, H-Morph), 1.64–1.61 (m, 1H, H-Morph), 1.47–1.44 (m, 1H,  $\text{CH}_2\text{Me}$ ), 0.77–0.74 (m, 1H, H-Morph), 0.34 (t,  $J = 7.3$  Hz, 3H,  $\text{MeCH}_2$ ).  $^{13}\text{C}$  NMR (150.9 MHz,  $\text{CDCl}_3$ , 25  $^{\circ}\text{C}$ )  $\delta$  324.2, 211.0, 156.7, 140.5, 139.7, 139.6, 138.5, 137.9, 137.7, 137.0, 132.1, 131.7, 130.0, 129.5, 129.3, 128.9, 128.1, 127.9, 126.5, 111.5, 79.2 (br.s), 67.5, 65.4, 59.1 (br.s), 53.5 (br.s), 52.1, 50.5, 25.8 (br.s), 21.1, 20.9, 20.8, 20.2, 18.8, 18.2, 10.8.

IR spectrum : 2951, 1601, 1586, 1423, 1304, 1262, 1183, 1025, 871, 820  $\text{cm}^{-1}$ .

HRMS (ESI-TOF)  $[\text{M}-\text{Cl}]^+$  calcd. for  $\text{C}_{35}\text{H}_{45}\text{Cl}_2\text{N}_3\text{ORu}$ : 660.2289, found: 620.2297.

**6. Activity of 4 and 5 in RCM reactions with *N,N*-diallyltosylamide**

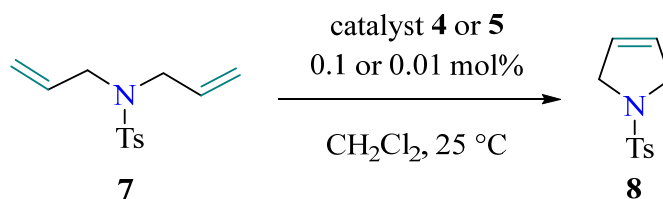

**Scheme S5.** Ring-closing metathesis reaction (RCM) with *N,N*-diallyltosylamide

Under an argon atmosphere, the solution of complex **4a–d** or **5a–d** in dry DCM (5 mL, 0.0008 mmol, 0.1 mol%) was added to a solution of *N,N*-diallyltosylamide **7** (0.20 g, 0.8 mmol, 1 equiv.) in dry DCM (15 mL). The reaction mixture was stirred at 25  $^{\circ}\text{C}$  for 30 min. During this time, an aliquot (1 mL) was sampled every 2 min and a 10% solution of ethyl vinyl ether in THF (0.2 mL) was added to this aliquot. Solvents were removed under reduced pressure and the **7/8** ratio was examined by  $^1\text{H}$  NMR.

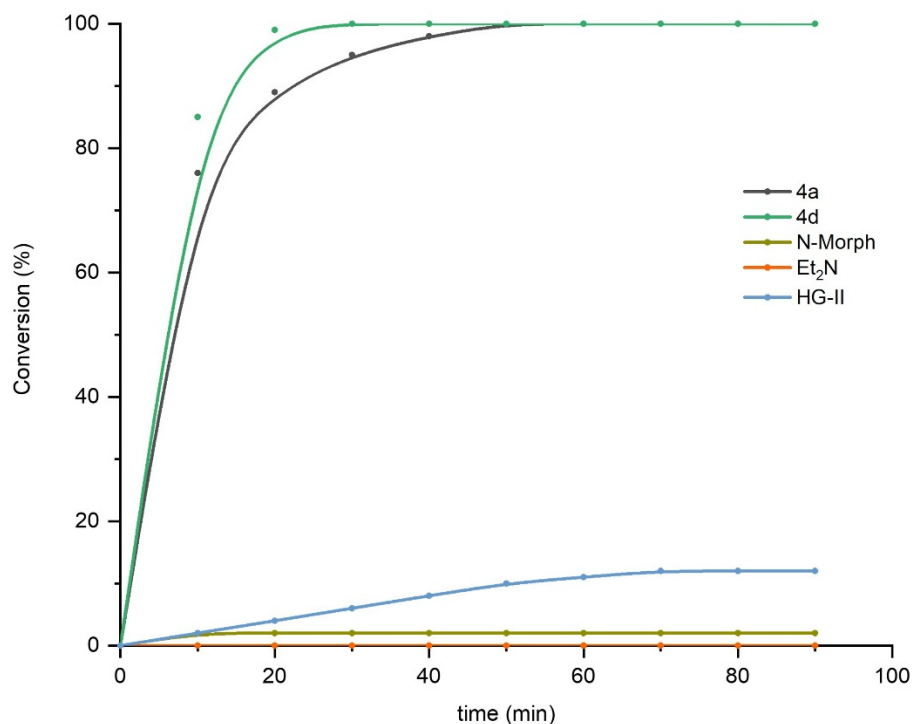

**Figure S1.** Time/conversion curves for RCM transformations of **7** (0.8 mmol, 200 mg) to **8** under the action of catalysts **4a**, **4d** compared to the previously reported **N-Morph** [1], **NEt<sub>2</sub>** [1] and **HG-II** [2]. Conditions: catalyst loading is 0.1% mol (0.0008 mmol), 25 °C, Ar, dry CH<sub>2</sub>Cl<sub>2</sub> (20 mL).

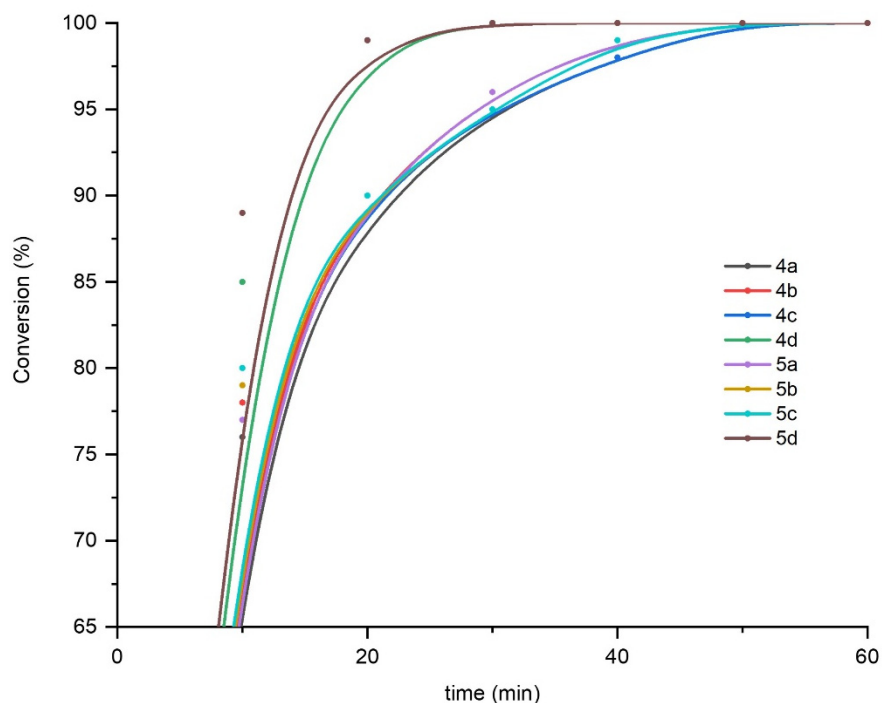

**Figure S2.** Time/conversion curves for RCM transformations of **7** (0.8 mmol, 200 mg) to **8** under the action of catalysts **4a–d** and **5a–d**. Conditions: catalyst loading is 0.1% mol (0.0008 mmol), 25 °C, Ar, dry CH<sub>2</sub>Cl<sub>2</sub> (20 mL). A fragment of the kinetic curve is presented to better reflect the course of reactions with various catalysts.

To study the efficiency of the catalysts, their concentration was reduced to 0.01 mol%. A solution of complex **4a–d** or **5a–d** in dry DCM (0.00008 mmol, 0.01 mol%, 5 mL) was added to a solution of *N,N*-diallyltosylamide **7** (0.20 g, 0.8 mmol, 1 equiv.) in dry DCM (15 mL) under an argon atmosphere. The reaction mixture was stirred at 25 °C for 30 min. During this time, an aliquot (1 mL) was sampled every 2 min and a 10% solution of ethyl vinyl ether in THF (0.2 mL) was added to this aliquot. Solvents were removed under reduced pressure and the **7/8** ratio was examined by  $^1\text{H}$  NMR.

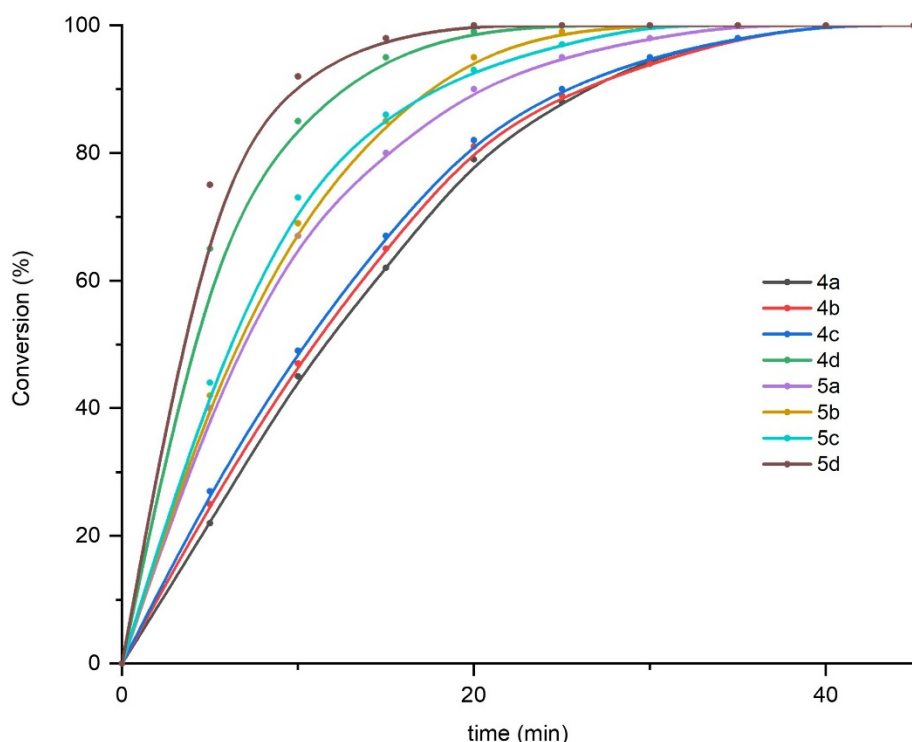

**Figure S3.** Time/conversion curves for RCM transformations of **7** (0.8 mmol, 200 mg) to **8** under the action of catalysts **4a–d** and **5a–d**. Conditions: catalyst loading is 0.01% mol (0.00008 mmol), 25 °C, Ar, dry  $\text{CH}_2\text{Cl}_2$  (20 mL).

**7. Polymerization of norborn-5-ene-2,3-dicarboxylic acid dibutyl ester (DBNB) catalyzed by complexes **4** and **5****

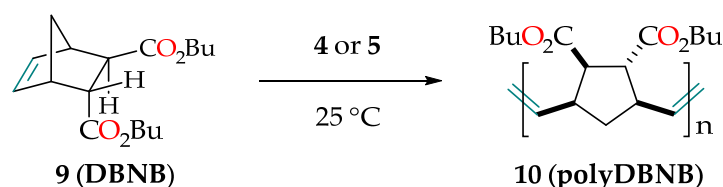

**Scheme S6.** ROMP polymerization of DBNB promoted by **4a**, **4d**, **5a**, **5d** catalysts.

A solution of complex **4** or **5** in dry DCM (2 mL, 0.008 mmol, 0.1 mol%) was added to thermostated (25 °C) and stirred (1000 rpm) **DBNB** (10 g, 0.05 mol, 1 equiv.). The temperature changes were measured and fixed every 5 seconds until a plateau was reached. As a result, solidification of the liquid substance was observed.



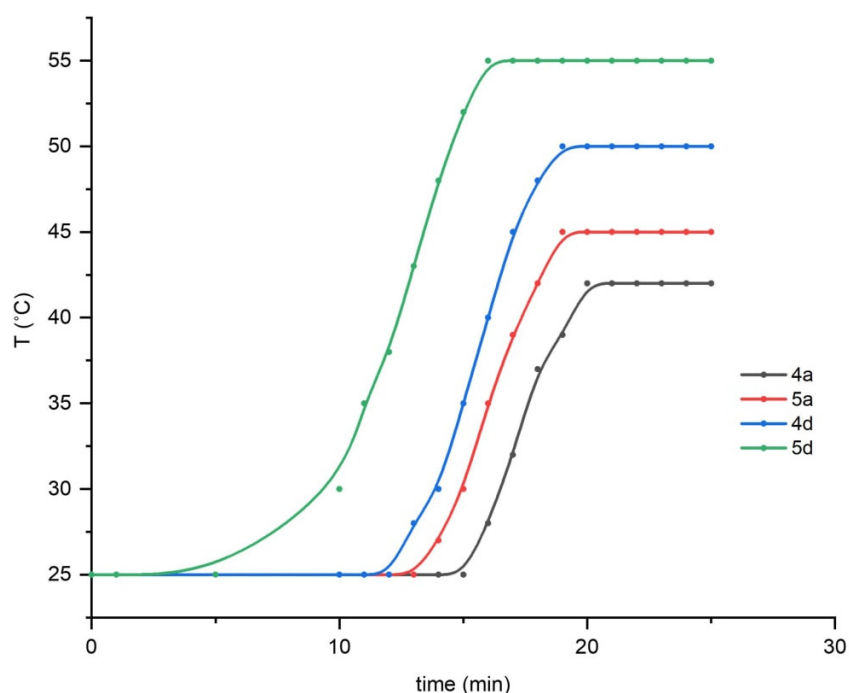

**Figure S4.** Isotherms of ROMP reactions of **DBNB** (10 g, 0.05 mol) under the action of catalysts **4a**, **4d**, **5a**, **5d**. Reaction conditions: catalyst loading is 0.1 % mol (0.008 mmol), starting temperature is 25 °C, neat.

## 8. X-ray analysis

The crystal structure of all synthesized substances was determined by X-ray structural analysis using an automatic four-circle area-detector diffractometer Bruker KAPPA APEX II with MoK $\alpha$  radiation. The cell parameters were refined over the entire data set, together with data reduction using SAINT-Plus software [3]. Absorption corrections were introduced using the SADABS program [4]. The structures were solved using the SHELXT-2018/2 program [5] and refined by full-matrix least squares on  $F^2$  in the anisotropic approximation for all non-hydrogen atoms [6]. The H atoms were placed in geometrically calculated positions with isotropic temperature factors equal to 1.2U<sub>eq</sub>(C) for CH<sub>2</sub> and CH-groups, and 1.5U<sub>eq</sub>(C) for CH<sub>3</sub>-groups, the orientation of CH<sub>3</sub>-groups was refined. In structures **4a**, **4b**, **5a** solvent molecules were strongly disordered and therefore it was removed using the SQUEEZE routine of PLATON [7], and the structure was then refined again using the data generated. Structure **5b** was refined as an inversion twin. Tables and figures for the structures were generated using Olex2 [8].

**Table S2.** Crystal data and structure refinement for structures **4a–4c**, **5a**, **5b**, **5d**

| Identification Code | <b>4a</b>                                                         | <b>4b</b>                                                         | <b>4c</b>                                                         | <b>5a</b>                                                         | <b>5b</b>                                                         | <b>5d</b>                                                          |
|---------------------|-------------------------------------------------------------------|-------------------------------------------------------------------|-------------------------------------------------------------------|-------------------------------------------------------------------|-------------------------------------------------------------------|--------------------------------------------------------------------|
| CCDC number         | 2232047                                                           | 2232048                                                           | 2232049                                                           | 2232050                                                           | 2232051                                                           | 2232052                                                            |
| Empirical formula   | C <sub>32</sub> H <sub>41</sub> Cl <sub>2</sub> N <sub>3</sub> Ru | C <sub>36</sub> H <sub>50</sub> N <sub>3</sub> Cl <sub>2</sub> Ru | C <sub>37</sub> H <sub>52</sub> N <sub>3</sub> Cl <sub>2</sub> Ru | C <sub>33</sub> H <sub>43</sub> Cl <sub>2</sub> N <sub>3</sub> Ru | C <sub>34</sub> H <sub>45</sub> N <sub>3</sub> Cl <sub>2</sub> Ru | C <sub>35</sub> H <sub>45</sub> Cl <sub>2</sub> N <sub>3</sub> ORu |
| Formula weight      | 689.74                                                            | 696.76                                                            | 710.78                                                            | 703.77                                                            | 667.70                                                            | 695.71                                                             |
| Temperature/K       | 296(2)                                                            | 120(2)                                                            | 120(2)                                                            | 100(2)                                                            | 100(2)                                                            | 100(2)                                                             |
| Crystal system      | monoclinic                                                        | monoclinic                                                        | monoclinic                                                        | monoclinic                                                        | orthorhombic                                                      | triclinic                                                          |
| Space group         | C2/c                                                              | C2/c                                                              | C2/c                                                              | C2/c                                                              | <i>Pna</i> 2 <sub>1</sub>                                         | P-1                                                                |
| a/Å                 | 36.4041(11)                                                       | 35.864(4)                                                         | 35.9118(15)                                                       | 36.3345(13)                                                       | 12.6799(9)                                                        | 10.800(3)                                                          |
| b/Å                 | 10.5974(3)                                                        | 10.6637(11)                                                       | 10.8652(5)                                                        | 10.4776(4)                                                        | 23.5558(17)                                                       | 14.366(4)                                                          |
| c/Å                 | 24.3725(7)                                                        | 24.284(3)                                                         | 24.4406(10)                                                       | 24.3610(9)                                                        | 10.6250(8)                                                        | 22.335(5)                                                          |

|                                                |                                                                |                                                               |                                                                |                                                                |                                                               |                                                                |
|------------------------------------------------|----------------------------------------------------------------|---------------------------------------------------------------|----------------------------------------------------------------|----------------------------------------------------------------|---------------------------------------------------------------|----------------------------------------------------------------|
| $\alpha/^\circ$                                | 90                                                             | 90                                                            | 90                                                             | 90                                                             | 90                                                            | 106.923(11)                                                    |
| $\beta/^\circ$                                 | 131.974(1)                                                     | 132.371(3)                                                    | 132.480(1)                                                     | 131.192(1)                                                     | 90                                                            | 91.005(10)                                                     |
| $\gamma/^\circ$                                | 90                                                             | 90                                                            | 90                                                             | 90                                                             | 90                                                            | 90.807(11)                                                     |
| Volume/ $\text{\AA}^3$                         | 6990.4(4)                                                      | 6861.4(14)                                                    | 7033.3(5)                                                      | 6978.9(5)                                                      | 3173.5(4)                                                     | 3314.1(15)                                                     |
| Z                                              | 8                                                              | 8                                                             | 8                                                              | 8                                                              | 4                                                             | 4                                                              |
| $\rho_{\text{calc}}/\text{g cm}^{-3}$          | 1.311                                                          | 1.349                                                         | 1.343                                                          | 1.340                                                          | 1.397                                                         | 1.394                                                          |
| $\mu/\text{mm}^{-1}$                           | 0.629                                                          | 0.641                                                         | 0.627                                                          | 0.631                                                          | 0.690                                                         | 0.666                                                          |
| F(000)                                         | 2888.0                                                         | 2920.0                                                        | 2984.0                                                         | 2952.0                                                         | 1392.0                                                        | 1448.0                                                         |
| Crystal size/ $\text{mm}^3$                    | $0.4 \times 0.34 \times 0.28$                                  | $0.33 \times 0.24 \times 0.17$                                | $0.28 \times 0.24 \times 0.18$                                 | $0.22 \times 0.18 \times 0.05$                                 | $0.28 \times 0.18 \times 0.12$                                | $0.18 \times 0.1 \times 0.04$                                  |
| Radiation                                      | MoK $\alpha$ ( $\lambda = 0.71073$ )                           | MoK $\alpha$ ( $\lambda = 0.71073$ )                          | MoK $\alpha$ ( $\lambda = 0.71073$ )                           | MoK $\alpha$ ( $\lambda = 0.71073$ )                           | MoK $\alpha$ ( $\lambda = 0.71073$ )                          | MoK $\alpha$ ( $\lambda = 0.71073$ )                           |
| 2 $\Theta$ range for data collection/ $^\circ$ | 8.26 to 60                                                     | 3.074 to 54.996                                               | 3.076 to 59.998                                                | 8.332 to 59.998                                                | 8.248 to 59.998                                               | 8.168 to 54.998                                                |
| Index ranges                                   | $-51 \leq h \leq 51, -14 \leq k \leq 14, -34 \leq l \leq 34$   | $-46 \leq h \leq 46, -13 \leq k \leq 13, -31 \leq l \leq 31$  | $-50 \leq h \leq 50, -15 \leq k \leq 15, -34 \leq l \leq 34$   | $-50 \leq h \leq 50, -14 \leq k \leq 14, -17 \leq l \leq 17$   | $-33 \leq h \leq 33, -14 \leq k \leq 14, -28 \leq l \leq 29$  | $-18 \leq h \leq 18, -14 \leq k \leq 14, -28 \leq l \leq 29$   |
| Reflections collected                          | 84467                                                          | 30647                                                         | 44508                                                          | 71399                                                          | 55496                                                         | 53770                                                          |
| Independent reflections                        | 10164 [ $R_{\text{int}} = 0.0368, R_{\text{sigma}} = 0.0238$ ] | 7880 [ $R_{\text{int}} = 0.0463, R_{\text{sigma}} = 0.0427$ ] | 10266 [ $R_{\text{int}} = 0.0455, R_{\text{sigma}} = 0.0414$ ] | 10147 [ $R_{\text{int}} = 0.0513, R_{\text{sigma}} = 0.0382$ ] | 8994 [ $R_{\text{int}} = 0.0478, R_{\text{sigma}} = 0.0414$ ] | 15147 [ $R_{\text{int}} = 0.1964, R_{\text{sigma}} = 0.2384$ ] |
| Data/restraints/parameters                     | 10164/0/349                                                    | 7880/0/358                                                    | 10266/2/398                                                    | 10147/0/358                                                    | 8994/1/367                                                    | 15147/0/770                                                    |
| Goodness-of-fit on $F^2$                       | 1.011                                                          | 1.014                                                         | 1.044                                                          | 1.034                                                          | 1.023                                                         | 1.039                                                          |
| Final R indexes [ $I \geq 2\sigma(I)$ ]        | $R_1 = 0.0275, wR_2 = 0.0690$                                  | $R_1 = 0.0316, wR_2 = 0.0710$                                 | $R_1 = 0.0450, wR_2 = 0.1092$                                  | $R_1 = 0.0295, wR_2 = 0.0647$                                  | $R_1 = 0.0275, wR_2 = 0.0520$                                 | $R_1 = 0.1046, wR_2 = 0.2474$                                  |
| Final R indexes [all data]                     | $R_1 = 0.0441, wR_2 = 0.0775$                                  | $R_1 = 0.0487, wR_2 = 0.0777$                                 | $R_1 = 0.0717, wR_2 = 0.1223$                                  | $R_1 = 0.0427, wR_2 = 0.0695$                                  | $R_1 = 0.0343, wR_2 = 0.0543$                                 | $R_1 = 0.2219, wR_2 = 0.3116$                                  |
| Largest diff. peak/hole/ $\text{e \AA}^{-3}$   | 0.47/-0.34                                                     | 0.52/-0.34                                                    | 1.03/-0.91                                                     | 0.50/-0.39                                                     | 0.40/-0.33                                                    | 2.43/-1.89                                                     |
| Flack parameter                                | —                                                              | —                                                             | —                                                              | —                                                              | 0.002(12)                                                     | —                                                              |

**Table S3.** Bond Lengths for **4a**

| Atom | Atom | Length/ $\text{\AA}$ | Atom | Atom | Length/ $\text{\AA}$ |
|------|------|----------------------|------|------|----------------------|
| Ru1  | Cl2  | 2.3403(4)            | C14  | C18  | 1.509(3)             |
| Ru1  | Cl1  | 2.3464(4)            | C15  | C16  | 1.389(3)             |
| Ru1  | N2   | 2.2672(14)           | C16  | C19  | 1.494(3)             |
| Ru1  | C2   | 2.0407(15)           | C21  | C22  | 1.392(3)             |
| Ru1  | C38  | 1.8227(16)           | C21  | C26  | 1.396(3)             |
| N1   | C2   | 1.345(2)             | C22  | C23  | 1.386(3)             |
| N1   | C5   | 1.476(2)             | C22  | C27  | 1.504(3)             |
| N1   | C11  | 1.431(2)             | C23  | C24  | 1.374(4)             |
| N2   | C31  | 1.504(2)             | C24  | C25  | 1.364(4)             |
| N2   | C40  | 1.477(2)             | C24  | C28  | 1.527(4)             |

|     |     |            |     |     |          |
|-----|-----|------------|-----|-----|----------|
| N2  | C41 | 1.483(2)   | C25 | C26 | 1.390(3) |
| N3  | C2  | 1.3491(19) | C26 | C29 | 1.501(3) |
| N3  | C4  | 1.471(2)   | C31 | C32 | 1.511(2) |
| N3  | C21 | 1.437(2)   | C31 | C39 | 1.538(2) |
| C4  | C5  | 1.504(3)   | C32 | C33 | 1.388(2) |
| C11 | C12 | 1.391(2)   | C32 | C37 | 1.414(2) |
| C11 | C16 | 1.396(2)   | C33 | C34 | 1.374(3) |
| C12 | C13 | 1.390(3)   | C34 | C35 | 1.362(3) |
| C12 | C17 | 1.503(3)   | C35 | C36 | 1.385(3) |
| C13 | C14 | 1.397(4)   | C36 | C37 | 1.402(2) |
| C14 | C15 | 1.374(3)   | C37 | C38 | 1.454(2) |

**Table S4.** Bond Angles for **4a**

| Atom | Atom | Atom | Angle/°    | Atom | Atom | Atom | Angle/°    |
|------|------|------|------------|------|------|------|------------|
| Cl2  | Ru1  | Cl1  | 157.83(2)  | C15  | C14  | C13  | 118.05(19) |
| N2   | Ru1  | Cl2  | 88.13(4)   | C15  | C14  | C18  | 121.6(3)   |
| N2   | Ru1  | Cl1  | 89.27(4)   | C14  | C15  | C16  | 122.6(2)   |
| C2   | Ru1  | Cl2  | 94.24(4)   | C11  | C16  | C19  | 121.29(16) |
| C2   | Ru1  | Cl1  | 85.54(4)   | C15  | C16  | C11  | 117.69(18) |
| C2   | Ru1  | N2   | 171.70(6)  | C15  | C16  | C19  | 121.02(18) |
| C38  | Ru1  | Cl2  | 100.13(5)  | C22  | C21  | N3   | 118.49(17) |
| C38  | Ru1  | Cl1  | 101.76(5)  | C22  | C21  | C26  | 121.34(17) |
| C38  | Ru1  | N2   | 87.60(6)   | C26  | C21  | N3   | 119.92(17) |
| C38  | Ru1  | C2   | 99.78(7)   | C21  | C22  | C27  | 122.26(18) |
| C2   | N1   | C5   | 113.91(13) | C23  | C22  | C21  | 117.6(2)   |
| C2   | N1   | C11  | 128.19(13) | C23  | C22  | C27  | 120.0(2)   |
| C11  | N1   | C5   | 117.51(13) | C24  | C23  | C22  | 122.0(2)   |
| C31  | N2   | Ru1  | 108.44(9)  | C23  | C24  | C28  | 119.9(3)   |
| C40  | N2   | Ru1  | 101.20(11) | C25  | C24  | C23  | 119.0(2)   |
| C40  | N2   | C31  | 111.83(14) | C25  | C24  | C28  | 121.1(3)   |
| C40  | N2   | C41  | 108.02(15) | C24  | C25  | C26  | 121.9(2)   |
| C41  | N2   | Ru1  | 116.82(11) | C21  | C26  | C29  | 122.38(18) |
| C41  | N2   | C31  | 110.26(14) | C25  | C26  | C21  | 117.8(2)   |
| C2   | N3   | C4   | 114.23(13) | C25  | C26  | C29  | 119.8(2)   |
| C2   | N3   | C21  | 126.13(14) | N2   | C31  | C32  | 109.69(13) |
| C21  | N3   | C4   | 119.17(13) | N2   | C31  | C39  | 114.29(15) |
| N1   | C2   | Ru1  | 132.19(11) | C32  | C31  | C39  | 114.01(16) |
| N1   | C2   | N3   | 106.28(13) | C33  | C32  | C31  | 121.29(17) |
| N3   | C2   | Ru1  | 120.93(11) | C33  | C32  | C37  | 117.72(17) |
| N3   | C4   | C5   | 102.61(13) | C37  | C32  | C31  | 120.94(14) |

|     |     |     |            |     |     |     |            |
|-----|-----|-----|------------|-----|-----|-----|------------|
| N1  | C5  | C4  | 102.92(14) | C34 | C33 | C32 | 122.3(2)   |
| C12 | C11 | N1  | 118.74(15) | C35 | C34 | C33 | 120.51(19) |
| C12 | C11 | C16 | 121.84(16) | C34 | C35 | C36 | 119.2(2)   |
| C16 | C11 | N1  | 119.37(15) | C35 | C36 | C37 | 121.43(19) |
| C11 | C12 | C17 | 121.12(16) | C32 | C37 | C38 | 125.65(15) |
| C13 | C12 | C11 | 117.98(18) | C36 | C37 | C32 | 118.83(15) |
| C13 | C12 | C17 | 120.84(18) | C36 | C37 | C38 | 115.52(16) |
| C12 | C13 | C14 | 121.8(2)   | C37 | C38 | Ru1 | 130.36(13) |
| C13 | C14 | C18 | 120.3(2)   |     |     |     |            |

**Table S5.** Hydrogen Bonds for **4a**

| D   | H    | A   | d(D-H)/Å | d(H-A)/Å | d(D-A)/Å   | D-H-A/° |
|-----|------|-----|----------|----------|------------|---------|
| C31 | H31A | Cl1 | 0.98     | 2.47     | 3.2563(18) | 136.8   |
| C40 | H40A | Cl1 | 0.96     | 2.71     | 3.375(2)   | 127.0   |
| C41 | H41B | Cl2 | 0.96     | 2.55     | 3.141(2)   | 119.8   |

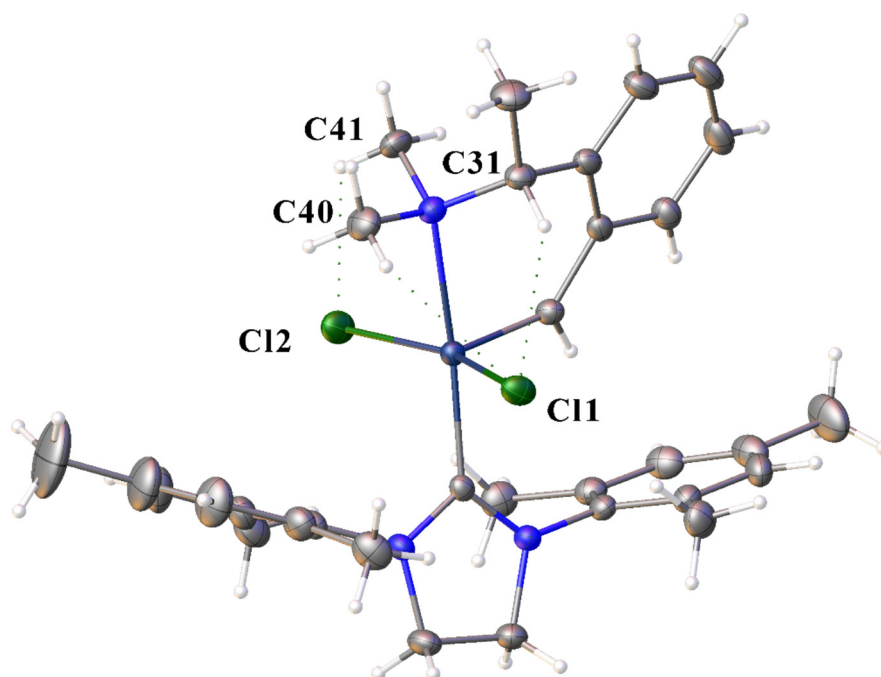

**Figure S5.** View showing intramolecular hydrogen bonds in **4a**.

**Table S6.** Torsion Angles for **4a**

| A   | B   | C   | D   | Angle/°     | A   | B   | C   | D   | Angle/°     |
|-----|-----|-----|-----|-------------|-----|-----|-----|-----|-------------|
| Ru1 | N2  | C31 | C32 | 70.28(14)   | C14 | C15 | C16 | C11 | -0.8(3)     |
| Ru1 | N2  | C31 | C39 | -160.25(13) | C14 | C15 | C16 | C19 | 179.0(2)    |
| Cl2 | Ru1 | C38 | C37 | 102.98(15)  | C16 | C11 | C12 | C13 | -1.9(3)     |
| Cl1 | Ru1 | C38 | C37 | -73.44(15)  | C16 | C11 | C12 | C17 | -179.11(17) |

|     |     |     |     |             |     |     |     |     |             |
|-----|-----|-----|-----|-------------|-----|-----|-----|-----|-------------|
| N1  | C11 | C12 | C13 | -179.28(15) | C17 | C12 | C13 | C14 | 178.05(19)  |
| N1  | C11 | C12 | C17 | 3.5(2)      | C18 | C14 | C15 | C16 | 178.5(2)    |
| N1  | C11 | C16 | C15 | 179.26(16)  | C21 | N3  | C2  | Ru1 | 16.9(2)     |
| N1  | C11 | C16 | C19 | -0.6(2)     | C21 | N3  | C2  | N1  | -170.91(15) |
| N2  | Ru1 | C38 | C37 | 15.31(15)   | C21 | N3  | C4  | C5  | 170.44(16)  |
| N2  | C31 | C32 | C33 | 136.13(16)  | C21 | C22 | C23 | C24 | -3.5(4)     |
| N2  | C31 | C32 | C37 | -46.4(2)    | C22 | C21 | C26 | C25 | -5.8(3)     |
| N3  | C4  | C5  | N1  | 2.19(19)    | C22 | C21 | C26 | C29 | 170.24(19)  |
| N3  | C21 | C22 | C23 | -178.92(19) | C22 | C23 | C24 | C25 | -0.9(5)     |
| N3  | C21 | C22 | C27 | 4.6(3)      | C22 | C23 | C24 | C28 | 179.5(4)    |
| N3  | C21 | C26 | C25 | -179.9(2)   | C23 | C24 | C25 | C26 | 2.1(5)      |
| N3  | C21 | C26 | C29 | -3.8(3)     | C24 | C25 | C26 | C21 | 1.2(4)      |
| C2  | Ru1 | C38 | C37 | -160.88(15) | C24 | C25 | C26 | C29 | -175.0(3)   |
| C2  | N1  | C5  | C4  | -1.8(2)     | C26 | C21 | C22 | C23 | 7.0(3)      |
| C2  | N1  | C11 | C12 | -84.0(2)    | C26 | C21 | C22 | C27 | -169.50(19) |
| C2  | N1  | C11 | C16 | 98.6(2)     | C27 | C22 | C23 | C24 | 173.0(3)    |
| C2  | N3  | C4  | C5  | -2.2(2)     | C28 | C24 | C25 | C26 | -178.4(4)   |
| C2  | N3  | C21 | C22 | 83.2(2)     | C31 | C32 | C33 | C34 | 176.55(18)  |
| C2  | N3  | C21 | C26 | -102.6(2)   | C31 | C32 | C37 | C36 | -176.59(15) |
| C4  | N3  | C2  | Ru1 | -171.06(12) | C31 | C32 | C37 | C38 | 2.5(2)      |
| C4  | N3  | C2  | N1  | 1.10(19)    | C32 | C33 | C34 | C35 | 0.6(3)      |
| C4  | N3  | C21 | C22 | -88.4(2)    | C32 | C37 | C38 | Ru1 | 7.0(2)      |
| C4  | N3  | C21 | C26 | 85.8(2)     | C33 | C32 | C37 | C36 | 0.9(2)      |
| C5  | N1  | C2  | Ru1 | 171.45(12)  | C33 | C32 | C37 | C38 | 180.00(16)  |
| C5  | N1  | C2  | N3  | 0.54(18)    | C33 | C34 | C35 | C36 | -0.2(3)     |
| C5  | N1  | C11 | C12 | 88.43(19)   | C34 | C35 | C36 | C37 | 0.2(3)      |
| C5  | N1  | C11 | C16 | -89.04(19)  | C35 | C36 | C37 | C32 | -0.6(3)     |
| C11 | N1  | C2  | Ru1 | -15.9(2)    | C35 | C36 | C37 | C38 | -179.76(16) |
| C11 | N1  | C2  | N3  | 173.15(15)  | C36 | C37 | C38 | Ru1 | -173.85(13) |
| C11 | N1  | C5  | C4  | -175.29(15) | C37 | C32 | C33 | C34 | -0.9(3)     |
| C11 | C12 | C13 | C14 | 0.8(3)      | C39 | C31 | C32 | C33 | 6.5(2)      |
| C12 | C11 | C16 | C15 | 1.9(3)      | C39 | C31 | C32 | C37 | -176.07(16) |
| C12 | C11 | C16 | C19 | -177.97(17) | C40 | N2  | C31 | C32 | -178.99(14) |
| C12 | C13 | C14 | C15 | 0.2(3)      | C40 | N2  | C31 | C39 | -49.5(2)    |
| C12 | C13 | C14 | C18 | -178.5(2)   | C41 | N2  | C31 | C32 | -58.78(17)  |
| C13 | C14 | C15 | C16 | -0.2(3)     | C41 | N2  | C31 | C39 | 70.7(2)     |

**Table S7.** Bond Lengths for **4b**

| Atom | Atom | Length/Å  | Atom | Atom | Length/Å |
|------|------|-----------|------|------|----------|
| Ru1  | Cl1  | 2.3540(6) | C15  | C16  | 1.395(3) |

|     |     |            |     |     |          |
|-----|-----|------------|-----|-----|----------|
| Ru1 | Cl2 | 2.3608(6)  | C16 | C19 | 1.505(3) |
| Ru1 | N2  | 2.2629(18) | C21 | C22 | 1.405(3) |
| Ru1 | C2  | 2.048(2)   | C21 | C26 | 1.398(3) |
| Ru1 | C38 | 1.822(2)   | C22 | C23 | 1.390(3) |
| N1  | C2  | 1.350(3)   | C22 | C27 | 1.508(3) |
| N1  | C5  | 1.475(3)   | C23 | C24 | 1.385(4) |
| N1  | C11 | 1.434(3)   | C24 | C25 | 1.389(4) |
| N2  | C31 | 1.519(3)   | C24 | C28 | 1.508(3) |
| N2  | C40 | 1.481(3)   | C25 | C26 | 1.392(3) |
| N2  | C41 | 1.497(3)   | C26 | C29 | 1.499(3) |
| N3  | C2  | 1.356(3)   | C31 | C32 | 1.516(3) |
| N3  | C4  | 1.476(3)   | C31 | C39 | 1.527(3) |
| N3  | C21 | 1.437(3)   | C32 | C33 | 1.394(3) |
| C4  | C5  | 1.522(3)   | C32 | C37 | 1.418(3) |
| C11 | C12 | 1.400(3)   | C33 | C34 | 1.394(3) |
| C11 | C16 | 1.396(3)   | C34 | C35 | 1.376(4) |
| C12 | C13 | 1.394(3)   | C35 | C36 | 1.391(3) |
| C12 | C17 | 1.501(3)   | C36 | C37 | 1.407(3) |
| C13 | C14 | 1.384(4)   | C37 | C38 | 1.459(3) |
| C14 | C15 | 1.398(3)   | C41 | C42 | 1.523(3) |
| C14 | C18 | 1.506(3)   |     |     |          |

**Table S8.** Bond Angles for **4b**

| Atom | Atom | Atom | Angle/°    | Atom | Atom | Atom | Angle/°  |
|------|------|------|------------|------|------|------|----------|
| Cl1  | Ru1  | Cl2  | 161.09(2)  | C13  | C14  | C18  | 120.9(2) |
| N2   | Ru1  | Cl1  | 88.18(5)   | C15  | C14  | C18  | 120.8(2) |
| N2   | Ru1  | Cl2  | 90.27(5)   | C16  | C15  | C14  | 121.8(2) |
| C2   | Ru1  | Cl1  | 85.90(6)   | C11  | C16  | C19  | 120.9(2) |
| C2   | Ru1  | Cl2  | 93.50(6)   | C15  | C16  | C11  | 117.9(2) |
| C2   | Ru1  | N2   | 171.80(7)  | C15  | C16  | C19  | 121.2(2) |
| C38  | Ru1  | Cl1  | 103.54(7)  | C22  | C21  | N3   | 119.5(2) |
| C38  | Ru1  | Cl2  | 95.26(7)   | C26  | C21  | N3   | 118.8(2) |
| C38  | Ru1  | N2   | 88.66(8)   | C26  | C21  | C22  | 121.3(2) |
| C38  | Ru1  | C2   | 98.24(9)   | C21  | C22  | C27  | 121.9(2) |
| C2   | N1   | C5   | 114.40(17) | C23  | C22  | C21  | 118.1(2) |
| C2   | N1   | C11  | 128.47(18) | C23  | C22  | C27  | 120.0(2) |
| C11  | N1   | C5   | 117.00(17) | C24  | C23  | C22  | 122.0(2) |
| C31  | N2   | Ru1  | 107.97(13) | C23  | C24  | C25  | 118.3(2) |
| C40  | N2   | Ru1  | 115.74(14) | C23  | C24  | C28  | 121.0(3) |
| C40  | N2   | C31  | 109.69(18) | C25  | C24  | C28  | 120.6(3) |

|     |     |     |            |     |     |     |            |
|-----|-----|-----|------------|-----|-----|-----|------------|
| C40 | N2  | C41 | 108.59(18) | C24 | C25 | C26 | 122.2(2)   |
| C41 | N2  | Ru1 | 104.66(13) | C21 | C26 | C29 | 122.6(2)   |
| C41 | N2  | C31 | 110.04(18) | C25 | C26 | C21 | 117.8(2)   |
| C2  | N3  | C4  | 114.44(17) | C25 | C26 | C29 | 119.5(2)   |
| C2  | N3  | C21 | 126.11(18) | N2  | C31 | C39 | 114.67(19) |
| C21 | N3  | C4  | 118.51(17) | C32 | C31 | N2  | 110.12(18) |
| N1  | C2  | Ru1 | 132.29(16) | C32 | C31 | C39 | 113.81(19) |
| N1  | C2  | N3  | 106.08(18) | C33 | C32 | C31 | 121.0(2)   |
| N3  | C2  | Ru1 | 120.96(15) | C33 | C32 | C37 | 118.1(2)   |
| N3  | C4  | C5  | 102.35(17) | C37 | C32 | C31 | 120.8(2)   |
| N1  | C5  | C4  | 102.73(17) | C32 | C33 | C34 | 121.9(2)   |
| C12 | C11 | N1  | 119.2(2)   | C35 | C34 | C33 | 120.3(2)   |
| C16 | C11 | N1  | 118.74(19) | C34 | C35 | C36 | 119.1(2)   |
| C16 | C11 | C12 | 122.0(2)   | C35 | C36 | C37 | 121.6(2)   |
| C11 | C12 | C17 | 120.8(2)   | C32 | C37 | C38 | 125.2(2)   |
| C13 | C12 | C11 | 117.8(2)   | C36 | C37 | C32 | 119.0(2)   |
| C13 | C12 | C17 | 121.5(2)   | C36 | C37 | C38 | 115.8(2)   |
| C14 | C13 | C12 | 122.2(2)   | C37 | C38 | Ru1 | 130.49(17) |
| C13 | C14 | C15 | 118.3(2)   | N2  | C41 | C42 | 113.2(2)   |

**Table S9.** Hydrogen Bonds for **4b**

| D   | H    | A                | d(D-H)/Å | d(H-A)/Å | d(D-A)/Å | D-H-A/° |
|-----|------|------------------|----------|----------|----------|---------|
| C4  | H4A  | Cl2 <sup>1</sup> | 0.99     | 2.74     | 3.527(2) | 136.6   |
| C5  | H5B  | Cl2 <sup>1</sup> | 0.99     | 2.82     | 3.567(2) | 133.1   |
| C31 | H31A | Cl1              | 1.00     | 2.48     | 3.266(2) | 135.6   |
| C40 | H40B | Cl2              | 0.98     | 2.63     | 3.164(3) | 114.1   |
| C41 | H41B | Cl1              | 0.99     | 2.81     | 3.342(2) | 114.6   |

<sup>1</sup>1/2-X,-1/2+Y,1/2-Z

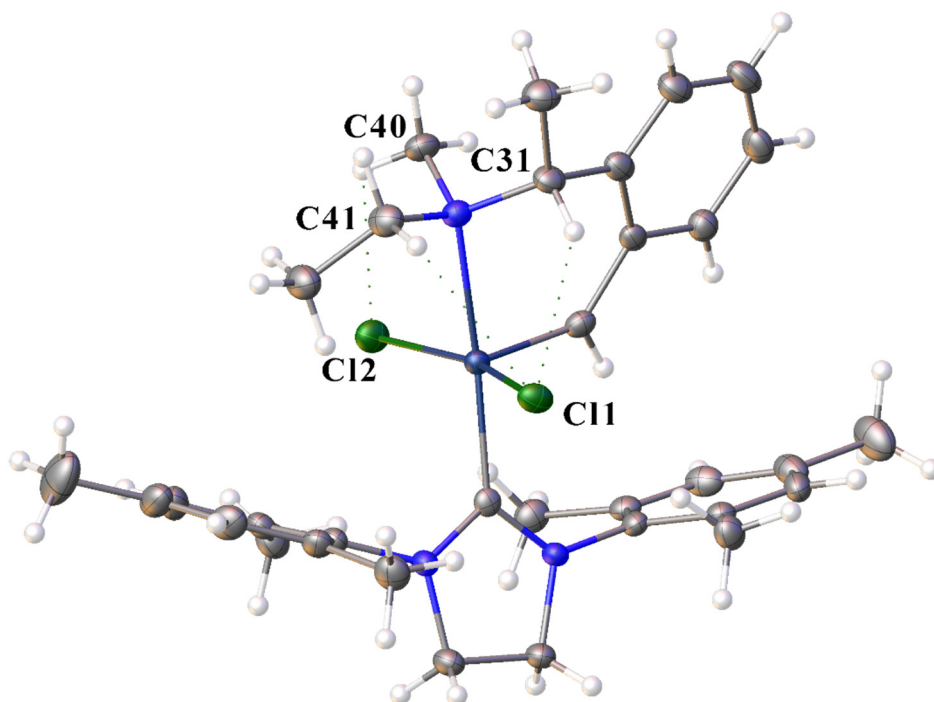

**Figure S6.** View showing intramolecular hydrogen bonds in **4b**.

**Table S10.** Torsion Angles for **4b**

| A   | B   | C   | D   | Angle/°     | A   | B   | C   | D   | Angle/°    |
|-----|-----|-----|-----|-------------|-----|-----|-----|-----|------------|
| Ru1 | N2  | C31 | C32 | 69.84(19)   | C14 | C15 | C16 | C19 | 177.2(2)   |
| Ru1 | N2  | C31 | C39 | -160.25(16) | C16 | C11 | C12 | C13 | 1.3(3)     |
| Ru1 | N2  | C41 | C42 | -45.9(2)    | C16 | C11 | C12 | C17 | -179.3(2)  |
| Cl1 | Ru1 | C38 | C37 | -74.2(2)    | C17 | C12 | C13 | C14 | -180.0(2)  |
| Cl2 | Ru1 | C38 | C37 | 103.7(2)    | C18 | C14 | C15 | C16 | -178.6(2)  |
| N1  | C11 | C12 | C13 | 178.36(19)  | C21 | N3  | C2  | Ru1 | 19.0(3)    |
| N1  | C11 | C12 | C17 | -2.2(3)     | C21 | N3  | C2  | N1  | -169.2(2)  |
| N1  | C11 | C16 | C15 | -178.18(19) | C21 | N3  | C4  | C5  | 169.95(19) |
| N1  | C11 | C16 | C19 | 4.7(3)      | C21 | C22 | C23 | C24 | 0.8(4)     |
| N2  | Ru1 | C38 | C37 | 13.6(2)     | C22 | C21 | C26 | C25 | 7.3(3)     |
| N2  | C31 | C32 | C33 | 135.5(2)    | C22 | C21 | C26 | C29 | -167.9(2)  |
| N2  | C31 | C32 | C37 | -48.2(3)    | C22 | C23 | C24 | C25 | 2.6(4)     |
| N3  | C4  | C5  | N1  | 0.0(2)      | C22 | C23 | C24 | C28 | 179.8(3)   |
| N3  | C21 | C22 | C23 | -179.2(2)   | C23 | C24 | C25 | C26 | -1.1(4)    |
| N3  | C21 | C22 | C27 | -1.8(3)     | C24 | C25 | C26 | C21 | -3.8(4)    |
| N3  | C21 | C26 | C25 | -179.4(2)   | C24 | C25 | C26 | C29 | 171.6(2)   |
| N3  | C21 | C26 | C29 | 5.5(3)      | C26 | C21 | C22 | C23 | -5.8(3)    |
| C2  | Ru1 | C38 | C37 | -162.0(2)   | C26 | C21 | C22 | C27 | 171.5(2)   |
| C2  | N1  | C5  | C4  | -0.3(2)     | C27 | C22 | C23 | C24 | -176.6(2)  |
| C2  | N1  | C11 | C12 | 96.8(3)     | C28 | C24 | C25 | C26 | -178.3(3)  |



|     |     |     |     |             |     |     |     |     |             |
|-----|-----|-----|-----|-------------|-----|-----|-----|-----|-------------|
| C2  | N1  | C11 | C16 | -86.0(3)    | C31 | N2  | C41 | C42 | -161.7(2)   |
| C2  | N3  | C4  | C5  | 0.4(3)      | C31 | C32 | C33 | C34 | 175.8(2)    |
| C2  | N3  | C21 | C22 | -107.9(3)   | C31 | C32 | C37 | C36 | -175.7(2)   |
| C2  | N3  | C21 | C26 | 78.6(3)     | C31 | C32 | C37 | C38 | 4.0(3)      |
| C4  | N3  | C2  | Ru1 | -172.31(15) | C32 | C33 | C34 | C35 | 0.6(4)      |
| C4  | N3  | C2  | N1  | -0.6(3)     | C32 | C37 | C38 | Ru1 | 7.8(3)      |
| C4  | N3  | C21 | C22 | 83.9(3)     | C33 | C32 | C37 | C36 | 0.7(3)      |
| C4  | N3  | C21 | C26 | -89.6(3)    | C33 | C32 | C37 | C38 | -179.6(2)   |
| C5  | N1  | C2  | Ru1 | 170.97(17)  | C33 | C34 | C35 | C36 | -0.5(4)     |
| C5  | N1  | C2  | N3  | 0.5(2)      | C34 | C35 | C36 | C37 | 0.6(4)      |
| C5  | N1  | C11 | C12 | -87.5(2)    | C35 | C36 | C37 | C32 | -0.7(3)     |
| C5  | N1  | C11 | C16 | 89.6(2)     | C35 | C36 | C37 | C38 | 179.6(2)    |
| C11 | N1  | C2  | Ru1 | -13.3(3)    | C36 | C37 | C38 | Ru1 | -172.41(17) |
| C11 | N1  | C2  | N3  | 176.3(2)    | C37 | C32 | C33 | C34 | -0.7(3)     |
| C11 | N1  | C5  | C4  | -176.55(19) | C39 | C31 | C32 | C33 | 5.1(3)      |
| C11 | C12 | C13 | C14 | -0.5(3)     | C39 | C31 | C32 | C37 | -178.6(2)   |
| C12 | C11 | C16 | C15 | -1.1(3)     | C40 | N2  | C31 | C32 | -57.1(2)    |
| C12 | C11 | C16 | C19 | -178.2(2)   | C40 | N2  | C31 | C39 | 72.8(2)     |
| C12 | C13 | C14 | C15 | -0.4(4)     | C40 | N2  | C41 | C42 | 78.3(2)     |
| C12 | C13 | C14 | C18 | 178.8(2)    | C41 | N2  | C31 | C32 | -176.49(18) |
| C13 | C14 | C15 | C16 | 0.6(4)      | C41 | N2  | C31 | C39 | -46.6(3)    |
| C14 | C15 | C16 | C11 | 0.1(3)      |     |     |     |     |             |

**Table S11.** Bond Lengths for **4c**

| Atom | Atom | Length/Å  | Atom | Atom | Length/Å |
|------|------|-----------|------|------|----------|
| Ru1  | Cl1  | 2.3509(7) | C21  | C22  | 1.392(4) |
| Ru1  | Cl2  | 2.3654(7) | C21  | C26  | 1.408(4) |
| Ru1  | N2   | 2.265(2)  | C22  | C23  | 1.398(4) |
| Ru1  | C2   | 2.042(3)  | C22  | C27  | 1.507(5) |
| Ru1  | C38  | 1.823(3)  | C23  | C24  | 1.384(5) |
| N1   | C2   | 1.348(3)  | C24  | C25  | 1.382(6) |
| N1   | C5   | 1.483(4)  | C24  | C28  | 1.515(5) |
| N1   | C11  | 1.430(3)  | C25  | C26  | 1.394(5) |
| N2   | C31  | 1.516(4)  | C26  | C29  | 1.498(5) |
| N2   | C40  | 1.502(4)  | C31  | C32  | 1.525(4) |
| N2   | C40A | 1.502(4)  | C31  | C39  | 1.535(5) |
| N2   | C42  | 1.495(4)  | C32  | C33  | 1.395(4) |
| N3   | C2   | 1.364(3)  | C32  | C37  | 1.421(4) |
| N3   | C4   | 1.472(4)  | C33  | C34  | 1.380(5) |
| N3   | C21  | 1.440(4)  | C34  | C35  | 1.379(5) |

|     |     |          |      |                  |           |
|-----|-----|----------|------|------------------|-----------|
| C4  | C5  | 1.515(4) | C35  | C36              | 1.389(4)  |
| C11 | C12 | 1.397(4) | C36  | C37              | 1.400(4)  |
| C11 | C16 | 1.400(4) | C37  | C38              | 1.457(4)  |
| C12 | C13 | 1.390(4) | C40  | C41              | 1.359(8)  |
| C12 | C17 | 1.500(4) | C40A | C41A             | 1.300(14) |
| C13 | C14 | 1.392(5) | C42  | C43              | 1.510(5)  |
| C14 | C15 | 1.385(5) | C1S  | C2S              | 1.542(10) |
| C14 | C18 | 1.517(5) | C2S  | C3S              | 1.500(11) |
| C15 | C16 | 1.394(4) | C3S  | C3S <sup>1</sup> | 1.546(18) |
| C16 | C19 | 1.507(4) |      |                  |           |

<sup>1</sup>-X,+Y,3/2-Z

**Table S12.** Bond Angles for **4c**

| Atom | Atom | Atom | Angle/°    | Atom | Atom | Atom | Angle/°  |
|------|------|------|------------|------|------|------|----------|
| Cl1  | Ru1  | Cl2  | 161.36(3)  | C15  | C14  | C18  | 121.4(3) |
| N2   | Ru1  | Cl1  | 88.32(7)   | C14  | C15  | C16  | 121.9(3) |
| N2   | Ru1  | Cl2  | 90.71(7)   | C11  | C16  | C19  | 120.3(3) |
| C2   | Ru1  | Cl1  | 86.22(7)   | C15  | C16  | C11  | 117.9(3) |
| C2   | Ru1  | Cl2  | 92.58(7)   | C15  | C16  | C19  | 121.7(3) |
| C2   | Ru1  | N2   | 171.97(10) | C22  | C21  | N3   | 119.7(3) |
| C38  | Ru1  | Cl1  | 103.20(9)  | C22  | C21  | C26  | 122.0(3) |
| C38  | Ru1  | Cl2  | 95.38(9)   | C26  | C21  | N3   | 117.9(3) |
| C38  | Ru1  | N2   | 88.69(11)  | C21  | C22  | C23  | 118.0(3) |
| C38  | Ru1  | C2   | 98.29(11)  | C21  | C22  | C27  | 122.5(3) |
| C2   | N1   | C5   | 114.1(2)   | C23  | C22  | C27  | 119.4(3) |
| C2   | N1   | C11  | 128.9(2)   | C24  | C23  | C22  | 121.5(4) |
| C11  | N1   | C5   | 116.9(2)   | C23  | C24  | C28  | 120.8(4) |
| C31  | N2   | Ru1  | 107.95(17) | C25  | C24  | C23  | 118.8(3) |
| C40  | N2   | Ru1  | 114.6(2)   | C25  | C24  | C28  | 120.4(4) |
| C40  | N2   | C31  | 110.9(2)   | C24  | C25  | C26  | 122.5(3) |
| C40A | N2   | Ru1  | 114.6(2)   | C21  | C26  | C29  | 122.6(3) |
| C40A | N2   | C31  | 110.9(2)   | C25  | C26  | C21  | 116.9(3) |
| C42  | N2   | Ru1  | 104.93(18) | C25  | C26  | C29  | 120.4(3) |
| C42  | N2   | C31  | 109.9(2)   | N2   | C31  | C32  | 110.1(2) |
| C42  | N2   | C40  | 108.4(2)   | N2   | C31  | C39  | 116.1(3) |
| C42  | N2   | C40A | 108.4(2)   | C32  | C31  | C39  | 113.7(3) |
| C2   | N3   | C4   | 114.2(2)   | C33  | C32  | C31  | 120.9(3) |
| C2   | N3   | C21  | 126.8(2)   | C33  | C32  | C37  | 117.9(3) |
| C21  | N3   | C4   | 118.4(2)   | C37  | C32  | C31  | 121.1(3) |
| N1   | C2   | Ru1  | 132.31(19) | C34  | C33  | C32  | 122.2(3) |

|     |     |     |            |      |      |                  |           |
|-----|-----|-----|------------|------|------|------------------|-----------|
| N1  | C2  | N3  | 106.2(2)   | C35  | C34  | C33              | 120.3(3)  |
| N3  | C2  | Ru1 | 121.07(19) | C34  | C35  | C36              | 119.0(3)  |
| N3  | C4  | C5  | 102.7(2)   | C35  | C36  | C37              | 121.9(3)  |
| N1  | C5  | C4  | 102.8(2)   | C32  | C37  | C38              | 125.3(3)  |
| C12 | C11 | N1  | 119.3(2)   | C36  | C37  | C32              | 118.7(3)  |
| C12 | C11 | C16 | 121.8(3)   | C36  | C37  | C38              | 116.0(3)  |
| C16 | C11 | N1  | 118.9(2)   | C37  | C38  | Ru1              | 130.3(2)  |
| C11 | C12 | C17 | 120.9(3)   | C41  | C40  | N2               | 123.0(5)  |
| C13 | C12 | C11 | 117.9(3)   | C41A | C40A | N2               | 125.8(10) |
| C13 | C12 | C17 | 121.2(3)   | N2   | C42  | C43              | 114.1(3)  |
| C12 | C13 | C14 | 122.0(3)   | C3S  | C2S  | C1S              | 106.7(8)  |
| C13 | C14 | C18 | 120.1(4)   | C2S  | C3S  | C3S <sup>1</sup> | 113.5(6)  |
| C15 | C14 | C13 | 118.5(3)   |      |      |                  |           |

<sup>1</sup>-X,+Y,3/2-Z

**Table S13.** Hydrogen Bonds for **4c**

| D    | H    | A                | d(D-H)/Å | d(H-A)/Å | d(D-A)/Å | D-H-A/° |
|------|------|------------------|----------|----------|----------|---------|
| C4   | H4A  | Cl2 <sup>1</sup> | 0.99     | 2.79     | 3.587(3) | 137.5   |
| C5   | H5B  | Cl2 <sup>1</sup> | 0.99     | 2.88     | 3.631(3) | 133.7   |
| C31  | H31A | Cl1              | 1.00     | 2.45     | 3.251(3) | 137.0   |
| C40A | H40C | Cl2              | 0.99     | 2.48     | 3.160(4) | 125.8   |
| C42  | H42B | Cl1              | 0.99     | 2.85     | 3.372(3) | 113.8   |

<sup>1</sup>/2-X,-1/2+Y,3/2-Z

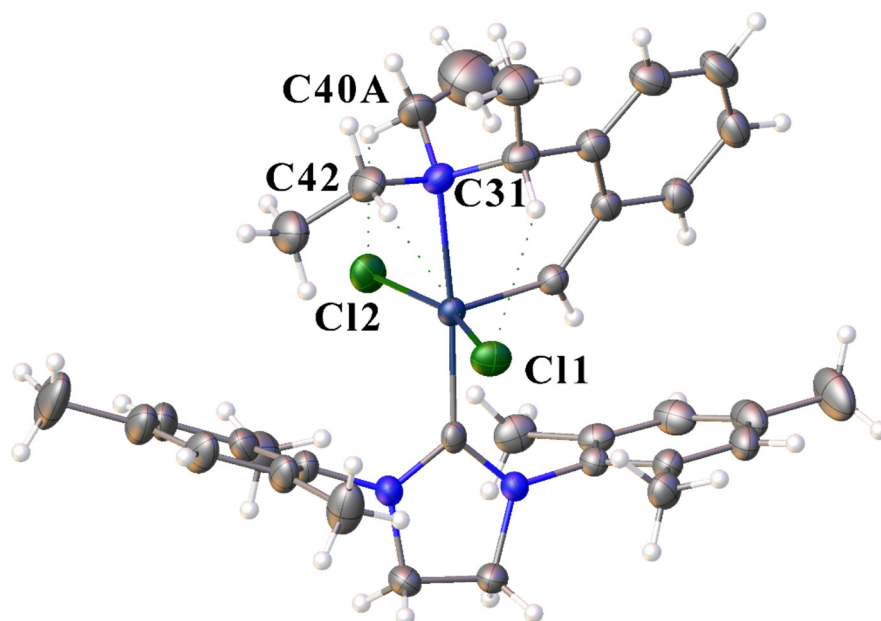

**Figure S7.** View showing intramolecular hydrogen bonds in **4c**. Only the main part of disordered C<sub>2</sub>H<sub>5</sub> group (participating in H-bonding) is shown.

**Table S14.** Torsion Angles for **4c**

| A   | B   | C    | D    | Angle/°   | A   | B   | C    | D    | Angle/°   |
|-----|-----|------|------|-----------|-----|-----|------|------|-----------|
| Ru1 | N2  | C31  | C32  | 69.5(2)   | C17 | C12 | C13  | C14  | 179.4(3)  |
| Ru1 | N2  | C31  | C39  | -159.5(2) | C18 | C14 | C15  | C16  | -179.0(3) |
| Ru1 | N2  | C40  | C41  | -168.2(5) | C21 | N3  | C2   | Ru1  | 16.3(4)   |
| Ru1 | N2  | C40A | C41A | -75.8(12) | C21 | N3  | C2   | N1   | -170.2(3) |
| Ru1 | N2  | C42  | C43  | -45.3(3)  | C21 | N3  | C4   | C5   | 170.5(3)  |
| Cl1 | Ru1 | C38  | C37  | -73.1(3)  | C21 | C22 | C23  | C24  | 0.0(6)    |
| Cl2 | Ru1 | C38  | C37  | 105.5(3)  | C22 | C21 | C26  | C25  | 6.8(5)    |
| N1  | C11 | C12  | C13  | 178.1(3)  | C22 | C21 | C26  | C29  | -168.8(3) |
| N1  | C11 | C12  | C17  | -2.3(4)   | C22 | C23 | C24  | C25  | 3.0(6)    |
| N1  | C11 | C16  | C15  | -177.8(3) | C22 | C23 | C24  | C28  | -179.6(4) |
| N1  | C11 | C16  | C19  | 4.8(4)    | C23 | C24 | C25  | C26  | -1.2(6)   |
| N2  | Ru1 | C38  | C37  | 14.9(3)   | C24 | C25 | C26  | C21  | -3.6(5)   |
| N2  | C31 | C32  | C33  | 136.2(3)  | C24 | C25 | C26  | C29  | 172.1(3)  |
| N2  | C31 | C32  | C37  | -47.0(4)  | C26 | C21 | C22  | C23  | -5.1(5)   |
| N3  | C4  | C5   | N1   | 1.0(3)    | C26 | C21 | C22  | C27  | 172.0(3)  |
| N3  | C21 | C22  | C23  | -178.1(3) | C27 | C22 | C23  | C24  | -177.2(4) |
| N3  | C21 | C22  | C27  | -1.0(5)   | C28 | C24 | C25  | C26  | -178.5(4) |
| N3  | C21 | C26  | C25  | 180.0(3)  | C31 | N2  | C40  | C41  | -45.7(6)  |
| N3  | C21 | C26  | C29  | 4.3(4)    | C31 | N2  | C40A | C41A | 46.7(12)  |
| C2  | Ru1 | C38  | C37  | -161.1(3) | C31 | N2  | C42  | C43  | -161.1(3) |
| C2  | N1  | C5   | C4   | -0.9(3)   | C31 | C32 | C33  | C34  | 176.3(3)  |
| C2  | N1  | C11  | C12  | 96.0(3)   | C31 | C32 | C37  | C36  | -175.5(3) |
| C2  | N1  | C11  | C16  | -87.3(4)  | C31 | C32 | C37  | C38  | 3.1(4)    |
| C2  | N3  | C4   | C5   | -0.8(3)   | C32 | C33 | C34  | C35  | -0.8(5)   |
| C2  | N3  | C21  | C22  | -104.5(4) | C32 | C37 | C38  | Ru1  | 7.0(4)    |
| C2  | N3  | C21  | C26  | 82.2(4)   | C33 | C32 | C37  | C36  | 1.4(4)    |
| C4  | N3  | C2   | Ru1  | -173.2(2) | C33 | C32 | C37  | C38  | -179.9(3) |
| C4  | N3  | C2   | N1   | 0.3(3)    | C33 | C34 | C35  | C36  | 1.4(5)    |
| C4  | N3  | C21  | C22  | 85.4(4)   | C34 | C35 | C36  | C37  | -0.6(5)   |
| C4  | N3  | C21  | C26  | -87.9(3)  | C35 | C36 | C37  | C32  | -0.8(4)   |
| C5  | N1  | C2   | Ru1  | 172.9(2)  | C35 | C36 | C37  | C38  | -179.6(3) |
| C5  | N1  | C2   | N3   | 0.5(3)    | C36 | C37 | C38  | Ru1  | -174.3(2) |
| C5  | N1  | C11  | C12  | -87.5(3)  | C37 | C32 | C33  | C34  | -0.6(5)   |
| C5  | N1  | C11  | C16  | 89.2(3)   | C39 | C31 | C32  | C33  | 3.9(4)    |
| C11 | N1  | C2   | Ru1  | -10.5(4)  | C39 | C31 | C32  | C37  | -179.2(3) |
| C11 | N1  | C2   | N3   | 177.1(3)  | C40 | N2  | C31  | C32  | -56.8(3)  |
| C11 | N1  | C5   | C4   | -178.0(2) | C40 | N2  | C31  | C39  | 74.2(4)   |

|     |     |     |     |           |      |     |      |                  |           |
|-----|-----|-----|-----|-----------|------|-----|------|------------------|-----------|
| C11 | C12 | C13 | C14 | -1.0(5)   | C40  | N2  | C42  | C43              | 77.5(3)   |
| C12 | C11 | C16 | C15 | -1.1(4)   | C40A | N2  | C31  | C32              | -56.8(3)  |
| C12 | C11 | C16 | C19 | -178.6(3) | C40A | N2  | C31  | C39              | 74.2(4)   |
| C12 | C13 | C14 | C15 | 0.3(5)    | C40A | N2  | C42  | C43              | 77.5(3)   |
| C12 | C13 | C14 | C18 | 179.4(3)  | C42  | N2  | C31  | C32              | -176.6(2) |
| C13 | C14 | C15 | C16 | 0.1(5)    | C42  | N2  | C31  | C39              | -45.6(4)  |
| C14 | C15 | C16 | C11 | 0.3(5)    | C42  | N2  | C40  | C41              | 75.0(6)   |
| C14 | C15 | C16 | C19 | 177.8(3)  | C42  | N2  | C40A | C41A             | 167.4(11) |
| C16 | C11 | C12 | C13 | 1.5(4)    | C1S  | C2S | C3S  | C3S <sup>1</sup> | 173.6(7)  |
| C16 | C11 | C12 | C17 | -178.9(3) |      |     |      |                  |           |

<sup>1</sup>-X<sub>r</sub>+Y<sub>3</sub>/2-Z

**Table S15.** Bond Lengths for **5a**

| Atom | Atom | Length/Å   | Atom | Atom | Length/Å |
|------|------|------------|------|------|----------|
| Ru1  | Cl1  | 2.3666(4)  | C15  | C16  | 1.405(2) |
| Ru1  | Cl2  | 2.3604(4)  | C16  | C19  | 1.505(2) |
| Ru1  | N2   | 2.2517(14) | C21  | C22  | 1.401(3) |
| Ru1  | C2   | 2.0401(16) | C21  | C26  | 1.404(2) |
| Ru1  | C38  | 1.8281(16) | C22  | C23  | 1.393(3) |
| N1   | C2   | 1.351(2)   | C22  | C27  | 1.512(2) |
| N1   | C5   | 1.479(2)   | C23  | C24  | 1.393(3) |
| N1   | C11  | 1.436(2)   | C24  | C25  | 1.391(3) |
| N2   | C31  | 1.506(2)   | C24  | C28  | 1.516(3) |
| N2   | C41  | 1.485(2)   | C25  | C26  | 1.401(3) |
| N2   | C42  | 1.489(2)   | C26  | C29  | 1.506(3) |
| N3   | C2   | 1.358(2)   | C31  | C32  | 1.526(2) |
| N3   | C4   | 1.474(2)   | C31  | C39  | 1.539(2) |
| N3   | C21  | 1.444(2)   | C32  | C33  | 1.396(2) |
| C4   | C5   | 1.533(2)   | C32  | C37  | 1.422(2) |
| C11  | C12  | 1.404(2)   | C33  | C34  | 1.391(3) |
| C11  | C16  | 1.393(2)   | C34  | C35  | 1.383(3) |
| C12  | C13  | 1.395(2)   | C35  | C36  | 1.386(2) |
| C12  | C17  | 1.507(2)   | C36  | C37  | 1.411(2) |
| C13  | C14  | 1.387(3)   | C37  | C38  | 1.468(2) |
| C14  | C15  | 1.391(3)   | C39  | C40  | 1.531(3) |
| C14  | C18  | 1.515(3)   |      |      |          |

**Table S16.** Bond Angles for **5a**

| Atom | Atom | Atom | Angle/°     | Atom | Atom | Atom | Angle/°    |
|------|------|------|-------------|------|------|------|------------|
| Cl2  | Ru1  | Cl1  | 161.542(16) | C13  | C14  | C18  | 119.95(18) |

|     |     |     |            |     |     |     |            |
|-----|-----|-----|------------|-----|-----|-----|------------|
| N2  | Ru1 | Cl1 | 90.02(4)   | C15 | C14 | C18 | 121.37(19) |
| N2  | Ru1 | Cl2 | 87.99(4)   | C14 | C15 | C16 | 121.81(17) |
| C2  | Ru1 | Cl1 | 85.37(4)   | C11 | C16 | C15 | 117.64(16) |
| C2  | Ru1 | Cl2 | 93.60(4)   | C11 | C16 | C19 | 121.15(16) |
| C2  | Ru1 | N2  | 170.06(6)  | C15 | C16 | C19 | 121.20(17) |
| C38 | Ru1 | Cl1 | 98.73(5)   | C22 | C21 | N3  | 119.03(15) |
| C38 | Ru1 | Cl2 | 99.54(5)   | C22 | C21 | C26 | 121.25(16) |
| C38 | Ru1 | N2  | 88.19(6)   | C26 | C21 | N3  | 119.58(16) |
| C38 | Ru1 | C2  | 101.20(7)  | C21 | C22 | C27 | 122.40(16) |
| C2  | N1  | C5  | 114.01(13) | C23 | C22 | C21 | 118.12(17) |
| C2  | N1  | C11 | 126.66(14) | C23 | C22 | C27 | 119.39(17) |
| C11 | N1  | C5  | 118.03(13) | C22 | C23 | C24 | 122.09(19) |
| C31 | N2  | Ru1 | 109.91(10) | C23 | C24 | C28 | 120.8(2)   |
| C41 | N2  | Ru1 | 117.33(10) | C25 | C24 | C23 | 118.20(18) |
| C41 | N2  | C31 | 109.94(13) | C25 | C24 | C28 | 121.0(2)   |
| C41 | N2  | C42 | 108.19(13) | C24 | C25 | C26 | 121.87(18) |
| C42 | N2  | Ru1 | 98.96(10)  | C21 | C26 | C29 | 122.00(16) |
| C42 | N2  | C31 | 112.10(13) | C25 | C26 | C21 | 117.97(18) |
| C2  | N3  | C4  | 114.28(13) | C25 | C26 | C29 | 119.93(17) |
| C2  | N3  | C21 | 124.69(14) | N2  | C31 | C32 | 109.76(13) |
| C21 | N3  | C4  | 120.70(14) | N2  | C31 | C39 | 113.14(14) |
| N1  | C2  | Ru1 | 132.71(12) | C32 | C31 | C39 | 115.16(15) |
| N1  | C2  | N3  | 106.62(14) | C33 | C32 | C31 | 120.21(15) |
| N3  | C2  | Ru1 | 119.98(11) | C33 | C32 | C37 | 117.68(15) |
| N3  | C4  | C5  | 102.30(13) | C37 | C32 | C31 | 122.06(15) |
| N1  | C5  | C4  | 102.63(13) | C34 | C33 | C32 | 122.59(16) |
| C12 | C11 | N1  | 118.15(15) | C35 | C34 | C33 | 119.82(17) |
| C16 | C11 | N1  | 119.69(15) | C34 | C35 | C36 | 119.11(17) |
| C16 | C11 | C12 | 122.08(15) | C35 | C36 | C37 | 122.02(16) |
| C11 | C12 | C17 | 121.30(15) | C32 | C37 | C38 | 125.89(15) |
| C13 | C12 | C11 | 117.91(16) | C36 | C37 | C32 | 118.77(15) |
| C13 | C12 | C17 | 120.77(16) | C36 | C37 | C38 | 115.33(14) |
| C14 | C13 | C12 | 121.87(17) | C37 | C38 | Ru1 | 129.10(12) |
| C13 | C14 | C15 | 118.68(16) | C40 | C39 | C31 | 112.92(16) |

**Table S17.** Hydrogen Bonds for **5a**

| D   | H    | A                | d(D-H)/Å | d(H-A)/Å | d(D-A)/Å   | D-H-A/° |
|-----|------|------------------|----------|----------|------------|---------|
| C5  | H5B  | Cl2 <sup>1</sup> | 0.99     | 2.83     | 3.6133(18) | 136.1   |
| C31 | H31A | Cl1              | 1.00     | 2.46     | 3.2483(18) | 135.6   |
| C41 | H41B | Cl2              | 0.98     | 2.51     | 3.1389(18) | 121.4   |

|     |      |     |      |      |            |       |
|-----|------|-----|------|------|------------|-------|
| C42 | H42A | Cl1 | 0.98 | 2.77 | 3.4341(19) | 126.0 |
|-----|------|-----|------|------|------------|-------|

$1/2-X, 1/2+Y, 1/2-Z$

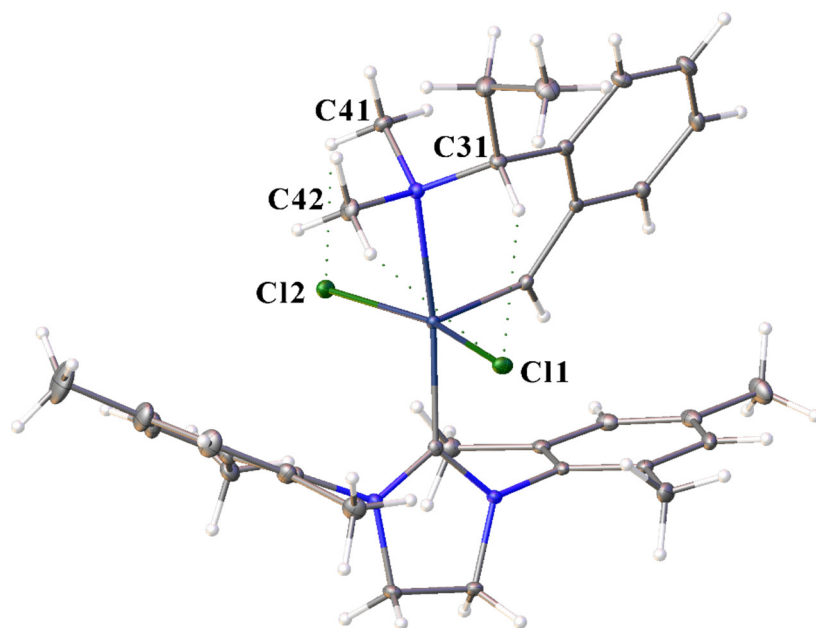

**Figure S8.** View showing intramolecular hydrogen bonds in **5a**.

**Table S18.** Torsion Angles for **5a**

| A   | B   | C   | D   | Angle/°     | A   | B   | C   | D   | Angle/°     |
|-----|-----|-----|-----|-------------|-----|-----|-----|-----|-------------|
| Ru1 | N2  | C31 | C32 | 67.73(14)   | C14 | C15 | C16 | C11 | -0.6(3)     |
| Ru1 | N2  | C31 | C39 | -162.12(12) | C14 | C15 | C16 | C19 | 178.61(17)  |
| Cl1 | Ru1 | C38 | C37 | -71.23(15)  | C16 | C11 | C12 | C13 | -0.7(2)     |
| Cl2 | Ru1 | C38 | C37 | 106.16(15)  | C16 | C11 | C12 | C17 | -179.28(16) |
| N1  | C11 | C12 | C13 | -177.48(14) | C17 | C12 | C13 | C14 | 178.33(16)  |
| N1  | C11 | C12 | C17 | 4.0(2)      | C18 | C14 | C15 | C16 | 179.96(17)  |
| N1  | C11 | C16 | C15 | 177.80(15)  | C21 | N3  | C2  | Ru1 | 16.3(2)     |
| N1  | C11 | C16 | C19 | -1.4(2)     | C21 | N3  | C2  | N1  | -172.07(15) |
| N2  | Ru1 | C38 | C37 | 18.51(15)   | C21 | N3  | C4  | C5  | 170.29(14)  |
| N2  | C31 | C32 | C33 | 140.81(16)  | C21 | C22 | C23 | C24 | -2.6(3)     |
| N2  | C31 | C32 | C37 | -41.8(2)    | C22 | C21 | C26 | C25 | -7.2(3)     |
| N2  | C31 | C39 | C40 | 146.26(16)  | C22 | C21 | C26 | C29 | 169.14(18)  |
| N3  | C4  | C5  | N1  | 3.84(16)    | C22 | C23 | C24 | C25 | -2.8(4)     |
| N3  | C21 | C22 | C23 | -176.47(17) | C22 | C23 | C24 | C28 | 179.1(2)    |
| N3  | C21 | C22 | C27 | 7.0(3)      | C23 | C24 | C25 | C26 | 3.4(4)      |
| N3  | C21 | C26 | C25 | 177.08(17)  | C24 | C25 | C26 | C21 | 1.5(3)      |
| N3  | C21 | C26 | C29 | -6.6(3)     | C24 | C25 | C26 | C29 | -174.9(2)   |
| C2  | Ru1 | C38 | C37 | -158.20(15) | C26 | C21 | C22 | C23 | 7.7(3)      |
| C2  | N1  | C5  | C4  | -3.53(18)   | C26 | C21 | C22 | C27 | -168.83(17) |

|     |     |     |     |             |     |     |     |     |             |
|-----|-----|-----|-----|-------------|-----|-----|-----|-----|-------------|
| C2  | N1  | C11 | C12 | -78.1(2)    | C27 | C22 | C23 | C24 | 174.0(2)    |
| C2  | N1  | C11 | C16 | 105.04(19)  | C28 | C24 | C25 | C26 | -178.5(2)   |
| C2  | N3  | C4  | C5  | -3.46(18)   | C31 | C32 | C33 | C34 | 177.03(17)  |
| C2  | N3  | C21 | C22 | 83.2(2)     | C31 | C32 | C37 | C36 | -178.02(15) |
| C2  | N3  | C21 | C26 | -100.9(2)   | C31 | C32 | C37 | C38 | 0.8(3)      |
| C4  | N3  | C2  | Ru1 | -170.24(11) | C32 | C31 | C39 | C40 | -86.4(2)    |
| C4  | N3  | C2  | N1  | 1.39(18)    | C32 | C33 | C34 | C35 | 1.2(3)      |
| C4  | N3  | C21 | C22 | -89.9(2)    | C32 | C37 | C38 | Ru1 | 4.2(3)      |
| C4  | N3  | C21 | C26 | 86.0(2)     | C33 | C32 | C37 | C36 | -0.6(2)     |
| C5  | N1  | C2  | Ru1 | 171.62(12)  | C33 | C32 | C37 | C38 | 178.26(16)  |
| C5  | N1  | C2  | N3  | 1.50(18)    | C33 | C34 | C35 | C36 | -0.9(3)     |
| C5  | N1  | C11 | C12 | 88.03(18)   | C34 | C35 | C36 | C37 | -0.2(3)     |
| C5  | N1  | C11 | C16 | -88.79(19)  | C35 | C36 | C37 | C32 | 0.9(3)      |
| C11 | N1  | C2  | Ru1 | -21.7(2)    | C35 | C36 | C37 | C38 | -178.05(16) |
| C11 | N1  | C2  | N3  | 168.15(15)  | C36 | C37 | C38 | Ru1 | -176.89(13) |
| C11 | N1  | C5  | C4  | -171.41(14) | C37 | C32 | C33 | C34 | -0.5(3)     |
| C11 | C12 | C13 | C14 | -0.2(3)     | C39 | C31 | C32 | C33 | 11.8(2)     |
| C12 | C11 | C16 | C15 | 1.1(2)      | C39 | C31 | C32 | C37 | -170.88(16) |
| C12 | C11 | C16 | C19 | -178.06(16) | C41 | N2  | C31 | C32 | -62.87(17)  |
| C12 | C13 | C14 | C15 | 0.7(3)      | C41 | N2  | C31 | C39 | 67.28(18)   |
| C12 | C13 | C14 | C18 | -179.55(17) | C42 | N2  | C31 | C32 | 176.75(14)  |
| C13 | C14 | C15 | C16 | -0.3(3)     | C42 | N2  | C31 | C39 | -53.10(19)  |

**Table S19.** Bond Lengths for **5b**

| Atom | Atom | Length/Å  | Atom | Atom | Length/Å |
|------|------|-----------|------|------|----------|
| Ru1  | Cl1  | 2.3594(7) | C15  | C16  | 1.403(4) |
| Ru1  | Cl2  | 2.3499(7) | C16  | C19  | 1.513(4) |
| Ru1  | N2   | 2.272(2)  | C21  | C22  | 1.409(4) |
| Ru1  | C2   | 2.059(3)  | C21  | C26  | 1.402(4) |
| Ru1  | C38  | 1.829(3)  | C22  | C23  | 1.390(4) |
| N1   | C2   | 1.350(3)  | C22  | C27  | 1.508(4) |
| N1   | C5   | 1.481(3)  | C23  | C24  | 1.395(4) |
| N1   | C11  | 1.442(3)  | C24  | C25  | 1.390(4) |
| N2   | C31  | 1.520(4)  | C24  | C28  | 1.512(4) |
| N2   | C41  | 1.491(4)  | C25  | C26  | 1.397(4) |
| N2   | C42  | 1.506(4)  | C26  | C29  | 1.515(4) |
| N3   | C2   | 1.359(3)  | C31  | C32  | 1.524(4) |
| N3   | C4   | 1.476(3)  | C31  | C39  | 1.533(4) |
| N3   | C21  | 1.441(3)  | C32  | C33  | 1.396(4) |
| C4   | C5   | 1.522(4)  | C32  | C37  | 1.424(4) |



|     |     |          |     |     |          |
|-----|-----|----------|-----|-----|----------|
| C11 | C12 | 1.396(4) | C33 | C34 | 1.390(4) |
| C11 | C16 | 1.400(4) | C34 | C35 | 1.380(5) |
| C12 | C13 | 1.400(4) | C35 | C36 | 1.386(4) |
| C12 | C17 | 1.502(4) | C36 | C37 | 1.412(4) |
| C13 | C14 | 1.400(4) | C37 | C38 | 1.463(4) |
| C14 | C15 | 1.395(4) | C39 | C40 | 1.535(5) |
| C14 | C18 | 1.515(4) | C42 | C43 | 1.523(4) |

**Table S20.** Bond Angles for **5b**

| Atom | Atom | Atom | Angle/°    | Atom | Atom | Atom | Angle/°  |
|------|------|------|------------|------|------|------|----------|
| Cl2  | Ru1  | Cl1  | 159.02(3)  | C15  | C14  | C18  | 120.8(3) |
| N2   | Ru1  | Cl1  | 88.17(6)   | C14  | C15  | C16  | 122.0(3) |
| N2   | Ru1  | Cl2  | 89.92(6)   | C11  | C16  | C15  | 117.8(3) |
| C2   | Ru1  | Cl1  | 86.54(7)   | C11  | C16  | C19  | 121.3(3) |
| C2   | Ru1  | Cl2  | 93.18(7)   | C15  | C16  | C19  | 120.8(3) |
| C2   | Ru1  | N2   | 172.62(9)  | C22  | C21  | N3   | 119.2(2) |
| C38  | Ru1  | Cl1  | 103.91(9)  | C26  | C21  | N3   | 119.1(2) |
| C38  | Ru1  | Cl2  | 96.98(9)   | C26  | C21  | C22  | 121.2(3) |
| C38  | Ru1  | N2   | 89.78(11)  | C21  | C22  | C27  | 122.0(3) |
| C38  | Ru1  | C2   | 96.48(11)  | C23  | C22  | C21  | 118.1(3) |
| C2   | N1   | C5   | 114.1(2)   | C23  | C22  | C27  | 119.9(2) |
| C2   | N1   | C11  | 129.9(2)   | C22  | C23  | C24  | 122.2(3) |
| C11  | N1   | C5   | 115.7(2)   | C23  | C24  | C28  | 119.9(3) |
| C31  | N2   | Ru1  | 108.20(16) | C25  | C24  | C23  | 118.1(3) |
| C41  | N2   | Ru1  | 116.22(18) | C25  | C24  | C28  | 121.9(3) |
| C41  | N2   | C31  | 109.9(2)   | C24  | C25  | C26  | 122.2(3) |
| C41  | N2   | C42  | 107.7(2)   | C21  | C26  | C29  | 122.4(3) |
| C42  | N2   | Ru1  | 104.29(16) | C25  | C26  | C21  | 118.0(3) |
| C42  | N2   | C31  | 110.4(2)   | C25  | C26  | C29  | 119.4(3) |
| C2   | N3   | C4   | 114.3(2)   | N2   | C31  | C32  | 109.8(2) |
| C2   | N3   | C21  | 127.5(2)   | N2   | C31  | C39  | 116.0(2) |
| C21  | N3   | C4   | 117.9(2)   | C32  | C31  | C39  | 114.1(3) |
| N1   | C2   | Ru1  | 132.39(19) | C33  | C32  | C31  | 121.3(3) |
| N1   | C2   | N3   | 106.2(2)   | C33  | C32  | C37  | 117.8(3) |
| N3   | C2   | Ru1  | 120.75(19) | C37  | C32  | C31  | 120.9(2) |
| N3   | C4   | C5   | 102.3(2)   | C34  | C33  | C32  | 122.0(3) |
| N1   | C5   | C4   | 102.7(2)   | C35  | C34  | C33  | 120.5(3) |
| C12  | C11  | N1   | 119.2(2)   | C34  | C35  | C36  | 119.0(3) |
| C12  | C11  | C16  | 122.1(2)   | C35  | C36  | C37  | 121.8(3) |
| C16  | C11  | N1   | 118.5(2)   | C32  | C37  | C38  | 125.2(3) |

|     |     |     |          |     |     |     |          |
|-----|-----|-----|----------|-----|-----|-----|----------|
| C11 | C12 | C13 | 118.0(3) | C36 | C37 | C32 | 118.9(3) |
| C11 | C12 | C17 | 120.8(2) | C36 | C37 | C38 | 115.9(2) |
| C13 | C12 | C17 | 121.1(3) | C37 | C38 | Ru1 | 129.9(2) |
| C14 | C13 | C12 | 121.9(3) | C31 | C39 | C40 | 113.0(3) |
| C13 | C14 | C18 | 121.0(3) | N2  | C42 | C43 | 113.0(2) |
| C15 | C14 | C13 | 118.2(3) |     |     |     |          |

**Table S21.** Hydrogen Bonds for **5b**

| D   | H    | A                | d(D-H)/Å | d(H-A)/Å | d(D-A)/Å | D-H-A/° |
|-----|------|------------------|----------|----------|----------|---------|
| C4  | H4A  | Cl2 <sup>1</sup> | 0.99     | 2.66     | 3.466(3) | 138.9   |
| C5  | H5B  | Cl2 <sup>1</sup> | 0.99     | 2.86     | 3.575(3) | 130.1   |
| C31 | H31A | Cl1              | 1.00     | 2.54     | 3.325(3) | 134.9   |
| C41 | H41B | Cl2              | 0.98     | 2.64     | 3.157(3) | 113.4   |
| C42 | H42B | Cl1              | 0.99     | 2.78     | 3.304(3) | 113.9   |
| C43 | H43A | Cl1 <sup>2</sup> | 0.98     | 2.75     | 3.716(3) | 169.6   |

<sup>1</sup>1-X,1-Y,1/2+Z; <sup>2</sup>-1/2+X,3/2-Y,+Z

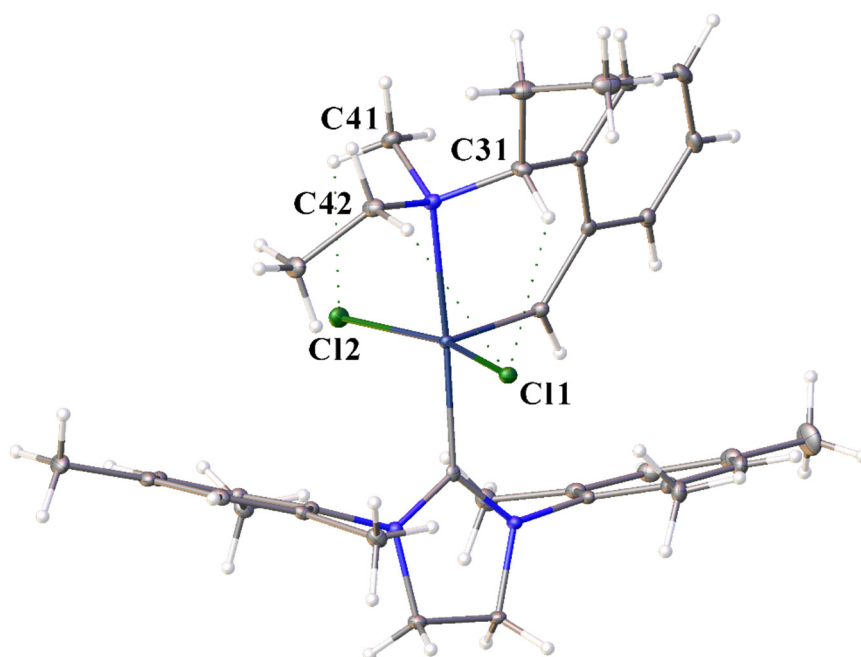

**Figure S9.** View showing intramolecular hydrogen bonds in **5b**.

**Table S22.** Torsion Angles for **5b**

| A   | B   | C   | D   | Angle/°   | A   | B   | C   | D   | Angle/°   |
|-----|-----|-----|-----|-----------|-----|-----|-----|-----|-----------|
| Ru1 | N2  | C31 | C32 | 69.3(2)   | C14 | C15 | C16 | C19 | 176.4(3)  |
| Ru1 | N2  | C31 | C39 | -159.4(2) | C16 | C11 | C12 | C13 | 0.7(4)    |
| Ru1 | N2  | C42 | C43 | -44.6(3)  | C16 | C11 | C12 | C17 | 179.4(3)  |
| Cl1 | Ru1 | C38 | C37 | -78.0(3)  | C17 | C12 | C13 | C14 | -179.8(3) |

|     |     |     |     |             |     |     |     |     |           |
|-----|-----|-----|-----|-------------|-----|-----|-----|-----|-----------|
| C12 | Ru1 | C38 | C37 | 99.9(3)     | C18 | C14 | C15 | C16 | 179.9(3)  |
| N1  | C11 | C12 | C13 | 176.5(2)    | C21 | N3  | C2  | Ru1 | 16.8(4)   |
| N1  | C11 | C12 | C17 | -4.8(4)     | C21 | N3  | C2  | N1  | -171.0(2) |
| N1  | C11 | C16 | C15 | -175.4(3)   | C21 | N3  | C4  | C5  | 168.8(2)  |
| N1  | C11 | C16 | C19 | 6.9(4)      | C21 | C22 | C23 | C24 | 1.1(4)    |
| N2  | Ru1 | C38 | C37 | 10.0(3)     | C22 | C21 | C26 | C25 | 6.0(4)    |
| N2  | C31 | C32 | C33 | 131.2(3)    | C22 | C21 | C26 | C29 | -168.3(3) |
| N2  | C31 | C32 | C37 | -51.2(3)    | C22 | C23 | C24 | C25 | 1.4(4)    |
| N2  | C31 | C39 | C40 | 155.1(3)    | C22 | C23 | C24 | C28 | 178.8(3)  |
| N3  | C4  | C5  | N1  | 5.9(3)      | C23 | C24 | C25 | C26 | -0.1(4)   |
| N3  | C21 | C22 | C23 | -176.6(2)   | C24 | C25 | C26 | C21 | -3.5(4)   |
| N3  | C21 | C22 | C27 | 0.2(4)      | C24 | C25 | C26 | C29 | 171.0(3)  |
| N3  | C21 | C26 | C25 | 177.8(2)    | C26 | C21 | C22 | C23 | -4.8(4)   |
| N3  | C21 | C26 | C29 | 3.5(4)      | C26 | C21 | C22 | C27 | 172.0(3)  |
| C2  | Ru1 | C38 | C37 | -166.0(3)   | C27 | C22 | C23 | C24 | -175.8(3) |
| C2  | N1  | C5  | C4  | -4.8(3)     | C28 | C24 | C25 | C26 | -177.6(3) |
| C2  | N1  | C11 | C12 | 93.6(3)     | C31 | N2  | C42 | C43 | -160.6(2) |
| C2  | N1  | C11 | C16 | -90.4(3)    | C31 | C32 | C33 | C34 | 176.8(3)  |
| C2  | N3  | C4  | C5  | -6.0(3)     | C31 | C32 | C37 | C36 | -175.5(3) |
| C2  | N3  | C21 | C22 | -106.1(3)   | C31 | C32 | C37 | C38 | 6.8(4)    |
| C2  | N3  | C21 | C26 | 81.9(3)     | C32 | C31 | C39 | C40 | -75.7(4)  |
| C4  | N3  | C2  | Ru1 | -168.97(18) | C32 | C33 | C34 | C35 | -1.0(5)   |
| C4  | N3  | C2  | N1  | 3.2(3)      | C32 | C37 | C38 | Ru1 | 9.3(4)    |
| C4  | N3  | C21 | C22 | 79.8(3)     | C33 | C32 | C37 | C36 | 2.1(4)    |
| C4  | N3  | C21 | C26 | -92.1(3)    | C33 | C32 | C37 | C38 | -175.6(3) |
| C5  | N1  | C2  | Ru1 | 172.1(2)    | C33 | C34 | C35 | C36 | 1.6(5)    |
| C5  | N1  | C2  | N3  | 1.3(3)      | C34 | C35 | C36 | C37 | -0.2(4)   |
| C5  | N1  | C11 | C12 | -93.4(3)    | C35 | C36 | C37 | C32 | -1.6(4)   |
| C5  | N1  | C11 | C16 | 82.6(3)     | C35 | C36 | C37 | C38 | 176.3(3)  |
| C11 | N1  | C2  | Ru1 | -14.8(4)    | C36 | C37 | C38 | Ru1 | -168.5(2) |
| C11 | N1  | C2  | N3  | 174.4(2)    | C37 | C32 | C33 | C34 | -0.9(4)   |
| C11 | N1  | C5  | C4  | -179.0(2)   | C39 | C31 | C32 | C33 | -1.1(4)   |
| C11 | C12 | C13 | C14 | -1.1(4)     | C39 | C31 | C32 | C37 | 176.5(3)  |
| C12 | C11 | C16 | C15 | 0.5(4)      | C41 | N2  | C31 | C32 | -58.5(3)  |
| C12 | C11 | C16 | C19 | -177.3(3)   | C41 | N2  | C31 | C39 | 72.8(3)   |
| C12 | C13 | C14 | C15 | 0.2(5)      | C41 | N2  | C42 | C43 | 79.4(3)   |
| C12 | C13 | C14 | C18 | -178.6(3)   | C42 | N2  | C31 | C32 | -177.1(2) |
| C13 | C14 | C15 | C16 | 1.0(5)      | C42 | N2  | C31 | C39 | -45.8(3)  |
| C14 | C15 | C16 | C11 | -1.4(5)     |     |     |     |     |           |

**Table S23.** Bond Lengths for **5d**

| Atom | Atom | Length/Å  | Atom | Atom | Length/Å  |
|------|------|-----------|------|------|-----------|
| Ru1  | Cl1  | 2.363(3)  | Ru1A | Cl1A | 2.362(3)  |
| Ru1  | Cl2  | 2.395(3)  | Ru1A | Cl2A | 2.389(3)  |
| Ru1  | N2   | 2.371(10) | Ru1A | N2A  | 2.358(11) |
| Ru1  | C2   | 2.005(12) | Ru1A | C2A  | 2.030(11) |
| Ru1  | C38  | 1.808(12) | Ru1A | C38A | 1.841(12) |
| O1   | C42  | 1.430(14) | O1A  | C42A | 1.424(14) |
| O1   | C43  | 1.442(14) | O1A  | C43A | 1.446(15) |
| N1   | C2   | 1.370(14) | N1A  | C2A  | 1.339(14) |
| N1   | C5   | 1.470(14) | N1A  | C5A  | 1.501(15) |
| N1   | C11  | 1.427(15) | N1A  | C11A | 1.433(14) |
| N2   | C31  | 1.500(14) | N2A  | C31A | 1.523(16) |
| N2   | C41  | 1.502(14) | N2A  | C41A | 1.508(15) |
| N2   | C44  | 1.519(16) | N2A  | C44A | 1.466(15) |
| N3   | C2   | 1.378(14) | N3A  | C2A  | 1.369(14) |
| N3   | C4   | 1.487(15) | N3A  | C4A  | 1.492(14) |
| N3   | C21  | 1.425(15) | N3A  | C21A | 1.434(14) |
| C4   | C5   | 1.513(17) | C4A  | C5A  | 1.522(17) |
| C11  | C12  | 1.394(17) | C11A | C12A | 1.378(17) |
| C11  | C16  | 1.420(16) | C11A | C16A | 1.414(16) |
| C12  | C13  | 1.393(18) | C12A | C13A | 1.380(18) |
| C12  | C17  | 1.518(16) | C12A | C17A | 1.515(16) |
| C13  | C14  | 1.380(18) | C13A | C14A | 1.417(18) |
| C14  | C15  | 1.360(17) | C14A | C15A | 1.389(18) |
| C14  | C18  | 1.530(18) | C14A | C18A | 1.517(17) |
| C15  | C16  | 1.396(16) | C15A | C16A | 1.396(17) |
| C16  | C19  | 1.511(16) | C16A | C19A | 1.496(16) |
| C21  | C22  | 1.417(16) | C21A | C22A | 1.415(16) |
| C21  | C26  | 1.422(16) | C21A | C26A | 1.404(16) |
| C22  | C23  | 1.383(16) | C22A | C23A | 1.403(16) |
| C22  | C27  | 1.504(16) | C22A | C27A | 1.518(15) |
| C23  | C24  | 1.381(16) | C23A | C24A | 1.379(16) |
| C24  | C25  | 1.417(16) | C24A | C25A | 1.405(15) |
| C24  | C28  | 1.496(16) | C24A | C28A | 1.519(16) |
| C25  | C26  | 1.372(16) | C25A | C26A | 1.368(16) |
| C26  | C29  | 1.505(17) | C26A | C29A | 1.538(17) |
| C31  | C32  | 1.524(16) | C31A | C32A | 1.497(19) |
| C31  | C39  | 1.529(18) | C31A | C39A | 1.522(18) |
| C32  | C33  | 1.371(18) | C32A | C33A | 1.391(19) |

|     |     |           |      |      |           |
|-----|-----|-----------|------|------|-----------|
| C32 | C37 | 1.382(17) | C32A | C37A | 1.423(19) |
| C33 | C34 | 1.397(19) | C33A | C34A | 1.39(2)   |
| C34 | C35 | 1.384(19) | C34A | C35A | 1.44(2)   |
| C35 | C36 | 1.391(19) | C35A | C36A | 1.374(19) |
| C36 | C37 | 1.416(17) | C36A | C37A | 1.376(18) |
| C37 | C38 | 1.479(18) | C37A | C38A | 1.439(17) |
| C39 | C40 | 1.547(18) | C39A | C40A | 1.533(18) |
| C41 | C42 | 1.520(16) | C41A | C42A | 1.523(17) |
| C43 | C44 | 1.469(17) | C43A | C44A | 1.522(19) |

**Table S24.** Bond Angles for **5d**

| Atom | Atom | Atom | Angle/°    | Atom | Atom | Atom | Angle/°    |
|------|------|------|------------|------|------|------|------------|
| Cl1  | Ru1  | Cl2  | 167.71(11) | Cl1A | Ru1A | Cl2A | 168.22(11) |
| Cl1  | Ru1  | N2   | 88.5(2)    | N2A  | Ru1A | Cl1A | 88.5(2)    |
| N2   | Ru1  | Cl2  | 92.7(2)    | N2A  | Ru1A | Cl2A | 93.0(2)    |
| C2   | Ru1  | Cl1  | 91.3(3)    | C2A  | Ru1A | Cl1A | 90.0(3)    |
| C2   | Ru1  | Cl2  | 85.5(3)    | C2A  | Ru1A | Cl2A | 86.7(3)    |
| C2   | Ru1  | N2   | 170.5(4)   | C2A  | Ru1A | N2A  | 170.9(4)   |
| C38  | Ru1  | Cl1  | 98.4(4)    | C38A | Ru1A | Cl1A | 97.7(4)    |
| C38  | Ru1  | Cl2  | 93.8(4)    | C38A | Ru1A | Cl2A | 94.0(4)    |
| C38  | Ru1  | N2   | 90.1(5)    | C38A | Ru1A | N2A  | 91.7(5)    |
| C38  | Ru1  | C2   | 99.3(5)    | C38A | Ru1A | C2A  | 97.5(5)    |
| C42  | O1   | C43  | 107.8(9)   | C42A | O1A  | C43A | 107.7(9)   |
| C2   | N1   | C5   | 113.7(10)  | C2A  | N1A  | C5A  | 112.6(9)   |
| C2   | N1   | C11  | 127.2(9)   | C2A  | N1A  | C11A | 129.6(10)  |
| C11  | N1   | C5   | 117.2(9)   | C11A | N1A  | C5A  | 117.4(9)   |
| C31  | N2   | Ru1  | 110.9(7)   | C31A | N2A  | Ru1A | 110.4(7)   |
| C31  | N2   | C41  | 108.7(8)   | C41A | N2A  | Ru1A | 114.7(7)   |
| C31  | N2   | C44  | 106.6(9)   | C41A | N2A  | C31A | 108.4(9)   |
| C41  | N2   | Ru1  | 113.4(7)   | C44A | N2A  | Ru1A | 110.6(8)   |
| C41  | N2   | C44  | 106.9(9)   | C44A | N2A  | C31A | 107.4(10)  |
| C44  | N2   | Ru1  | 110.0(7)   | C44A | N2A  | C41A | 105.0(10)  |
| C2   | N3   | C4   | 113.3(10)  | C2A  | N3A  | C4A  | 111.8(9)   |
| C2   | N3   | C21  | 125.2(9)   | C2A  | N3A  | C21A | 127.3(9)   |
| C21  | N3   | C4   | 120.7(9)   | C21A | N3A  | C4A  | 119.6(9)   |
| N1   | C2   | Ru1  | 134.6(8)   | N1A  | C2A  | Ru1A | 134.1(9)   |
| N1   | C2   | N3   | 105.4(10)  | N1A  | C2A  | N3A  | 108.4(9)   |
| N3   | C2   | Ru1  | 119.4(8)   | N3A  | C2A  | Ru1A | 117.1(8)   |
| N3   | C4   | C5   | 102.0(10)  | N3A  | C4A  | C5A  | 102.8(9)   |
| N1   | C5   | C4   | 103.0(10)  | N1A  | C5A  | C4A  | 102.0(9)   |

|     |     |     |           |      |      |      |           |
|-----|-----|-----|-----------|------|------|------|-----------|
| C12 | C11 | N1  | 120.0(10) | C12A | C11A | N1A  | 119.3(10) |
| C12 | C11 | C16 | 121.5(11) | C12A | C11A | C16A | 123.5(11) |
| C16 | C11 | N1  | 118.4(11) | C16A | C11A | N1A  | 117.0(10) |
| C11 | C12 | C17 | 120.5(12) | C11A | C12A | C13A | 117.4(11) |
| C13 | C12 | C11 | 117.6(11) | C11A | C12A | C17A | 121.6(11) |
| C13 | C12 | C17 | 122.0(12) | C13A | C12A | C17A | 121.0(12) |
| C14 | C13 | C12 | 122.4(13) | C12A | C13A | C14A | 121.9(12) |
| C13 | C14 | C18 | 121.5(13) | C13A | C14A | C18A | 119.8(13) |
| C15 | C14 | C13 | 118.7(12) | C15A | C14A | C13A | 118.5(11) |
| C15 | C14 | C18 | 119.7(12) | C15A | C14A | C18A | 121.8(12) |
| C14 | C15 | C16 | 122.9(11) | C14A | C15A | C16A | 121.5(11) |
| C11 | C16 | C19 | 121.6(11) | C11A | C16A | C19A | 121.2(11) |
| C15 | C16 | C11 | 116.9(11) | C15A | C16A | C11A | 117.0(11) |
| C15 | C16 | C19 | 121.5(10) | C15A | C16A | C19A | 121.8(11) |
| C22 | C21 | N3  | 120.5(11) | C22A | C21A | N3A  | 120.9(10) |
| C22 | C21 | C26 | 121.7(11) | C26A | C21A | N3A  | 118.4(10) |
| C26 | C21 | N3  | 117.6(11) | C26A | C21A | C22A | 120.5(11) |
| C21 | C22 | C27 | 122.0(10) | C21A | C22A | C27A | 120.8(11) |
| C23 | C22 | C21 | 116.3(11) | C23A | C22A | C21A | 117.3(10) |
| C23 | C22 | C27 | 121.6(10) | C23A | C22A | C27A | 121.6(11) |
| C24 | C23 | C22 | 124.1(11) | C24A | C23A | C22A | 122.3(11) |
| C23 | C24 | C25 | 116.9(11) | C23A | C24A | C25A | 118.5(11) |
| C23 | C24 | C28 | 123.6(11) | C23A | C24A | C28A | 121.1(11) |
| C25 | C24 | C28 | 119.4(11) | C25A | C24A | C28A | 120.3(11) |
| C26 | C25 | C24 | 122.5(11) | C26A | C25A | C24A | 121.1(11) |
| C21 | C26 | C29 | 122.2(11) | C21A | C26A | C29A | 119.8(11) |
| C25 | C26 | C21 | 117.4(11) | C25A | C26A | C21A | 119.8(11) |
| C25 | C26 | C29 | 120.3(11) | C25A | C26A | C29A | 120.3(11) |
| N2  | C31 | C32 | 111.9(9)  | N2A  | C31A | C39A | 114.7(11) |
| N2  | C31 | C39 | 114.0(10) | C32A | C31A | N2A  | 110.4(10) |
| C32 | C31 | C39 | 110.2(11) | C32A | C31A | C39A | 111.4(12) |
| C33 | C32 | C31 | 118.8(12) | C33A | C32A | C31A | 120.7(14) |
| C33 | C32 | C37 | 121.2(13) | C33A | C32A | C37A | 118.1(13) |
| C37 | C32 | C31 | 119.8(11) | C37A | C32A | C31A | 120.8(12) |
| C32 | C33 | C34 | 120.2(14) | C32A | C33A | C34A | 122.7(15) |
| C35 | C34 | C33 | 119.9(14) | C33A | C34A | C35A | 118.4(13) |
| C34 | C35 | C36 | 119.8(13) | C36A | C35A | C34A | 118.0(14) |
| C35 | C36 | C37 | 120.2(13) | C35A | C36A | C37A | 123.8(15) |
| C32 | C37 | C36 | 118.6(12) | C32A | C37A | C38A | 122.4(12) |
| C32 | C37 | C38 | 122.5(11) | C36A | C37A | C32A | 118.9(13) |

|     |     |     |           |      |      |      |           |
|-----|-----|-----|-----------|------|------|------|-----------|
| C36 | C37 | C38 | 118.7(11) | C36A | C37A | C38A | 118.4(12) |
| C37 | C38 | Ru1 | 124.1(9)  | C37A | C38A | Ru1A | 122.5(9)  |
| C31 | C39 | C40 | 112.4(12) | C31A | C39A | C40A | 115.4(12) |
| N2  | C41 | C42 | 112.0(9)  | N2A  | C41A | C42A | 111.1(10) |
| O1  | C42 | C41 | 111.8(11) | O1A  | C42A | C41A | 111.3(11) |
| O1  | C43 | C44 | 113.3(10) | O1A  | C43A | C44A | 111.1(10) |
| C43 | C44 | N2  | 109.8(10) | N2A  | C44A | C43A | 112.1(11) |

**Table S25.** Hydrogen Bonds for **5d**

| D    | H    | A                 | d(D-H)/Å | d(H-A)/Å | d(D-A)/Å  | D-H-A/° |
|------|------|-------------------|----------|----------|-----------|---------|
| C4   | H4A  | Cl1A <sup>1</sup> | 0.99     | 2.73     | 3.375(12) | 123.6   |
| C5   | H5B  | Cl1A <sup>1</sup> | 0.99     | 2.80     | 3.480(12) | 126.3   |
| C41  | H41B | Cl1               | 0.99     | 2.58     | 3.232(12) | 123.2   |
| C43  | H43B | Cl2               | 0.99     | 2.68     | 3.318(12) | 122.0   |
| C44  | H44B | Cl2               | 0.99     | 2.61     | 3.194(13) | 117.7   |
| C4A  | H4AA | Cl1 <sup>2</sup>  | 0.99     | 2.76     | 3.478(12) | 129.8   |
| C5A  | H5AB | Cl1 <sup>2</sup>  | 0.99     | 2.82     | 3.547(12) | 130.9   |
| C41A | H41D | Cl1A              | 0.99     | 2.65     | 3.259(13) | 119.9   |
| C43A | H43D | Cl2A              | 0.99     | 2.70     | 3.326(14) | 121.8   |
| C44A | H44C | Cl2A              | 0.99     | 2.64     | 3.205(14) | 116.6   |

<sup>1</sup>1-X,1-Y,1-Z; <sup>2</sup>1-X,2-Y,1-Z

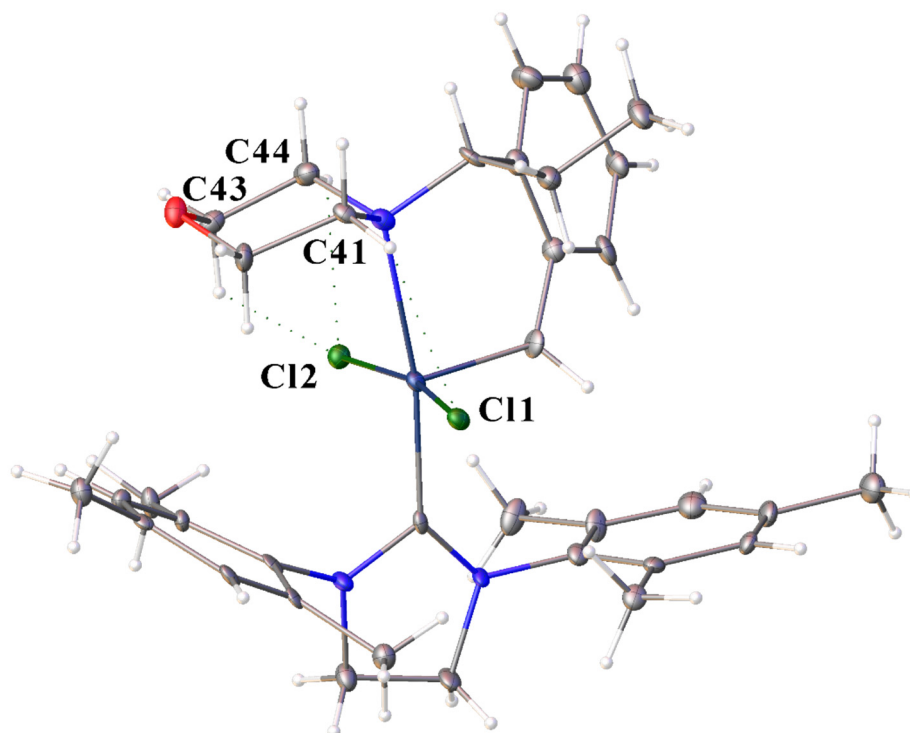

**Figure S10.** View showing intramolecular hydrogen bonds in **5d**. Only one independent molecule of the complex is shown.

**Table S26.** Torsion Angles for **5d**

| A   | B   | C   | D   | Angle/°    | A    | B    | C    | D    | Angle/°    |
|-----|-----|-----|-----|------------|------|------|------|------|------------|
| Ru1 | N2  | C31 | C32 | 52.7(11)   | Ru1A | N2A  | C31A | C32A | 52.8(12)   |
| Ru1 | N2  | C31 | C39 | -73.3(11)  | Ru1A | N2A  | C31A | C39A | -74.0(11)  |
| Ru1 | N2  | C41 | C42 | -67.6(11)  | Ru1A | N2A  | C41A | C42A | -64.3(11)  |
| Ru1 | N2  | C44 | C43 | 68.2(11)   | Ru1A | N2A  | C44A | C43A | 66.9(12)   |
| Cl1 | Ru1 | C38 | C37 | -127.2(10) | Cl1A | Ru1A | C38A | C37A | -126.5(10) |
| Cl2 | Ru1 | C38 | C37 | 54.1(10)   | Cl2A | Ru1A | C38A | C37A | 55.3(10)   |
| O1  | C43 | C44 | N2  | 61.9(13)   | O1A  | C43A | C44A | N2A  | 61.2(15)   |
| N1  | C11 | C12 | C13 | -179.1(12) | N1A  | C11A | C12A | C13A | -178.7(12) |
| N1  | C11 | C12 | C17 | 0.7(18)    | N1A  | C11A | C12A | C17A | 2.1(18)    |
| N1  | C11 | C16 | C15 | 179.2(10)  | N1A  | C11A | C16A | C15A | 178.1(11)  |
| N1  | C11 | C16 | C19 | -1.6(16)   | N1A  | C11A | C16A | C19A | -2.5(17)   |
| N2  | Ru1 | C38 | C37 | -38.7(10)  | N2A  | Ru1A | C38A | C37A | -37.8(10)  |
| N2  | C31 | C32 | C33 | 121.6(13)  | N2A  | C31A | C32A | C33A | 121.5(14)  |
| N2  | C31 | C32 | C37 | -63.5(15)  | N2A  | C31A | C32A | C37A | -65.9(16)  |
| N2  | C31 | C39 | C40 | 179.0(10)  | N2A  | C31A | C39A | C40A | -177.5(11) |
| N2  | C41 | C42 | O1  | -57.5(13)  | N2A  | C41A | C42A | O1A  | -61.6(13)  |
| N3  | C4  | C5  | N1  | -15.0(13)  | N3A  | C4A  | C5A  | N1A  | -14.8(12)  |
| N3  | C21 | C22 | C23 | -176.0(10) | N3A  | C21A | C22A | C23A | -178.8(10) |
| N3  | C21 | C22 | C27 | 7.1(16)    | N3A  | C21A | C22A | C27A | 7.9(17)    |
| N3  | C21 | C26 | C25 | 176.5(10)  | N3A  | C21A | C26A | C25A | 178.7(10)  |
| N3  | C21 | C26 | C29 | -4.1(15)   | N3A  | C21A | C26A | C29A | -5.3(15)   |
| C2  | Ru1 | C38 | C37 | 140.2(10)  | C2A  | Ru1A | C38A | C37A | 142.5(10)  |
| C2  | N1  | C5  | C4  | 13.8(14)   | C2A  | N1A  | C5A  | C4A  | 14.1(13)   |
| C2  | N1  | C11 | C12 | -105.5(14) | C2A  | N1A  | C11A | C12A | -102.1(14) |
| C2  | N1  | C11 | C16 | 76.5(16)   | C2A  | N1A  | C11A | C16A | 82.6(15)   |
| C2  | N3  | C4  | C5  | 13.3(14)   | C2A  | N3A  | C4A  | C5A  | 12.6(13)   |
| C2  | N3  | C21 | C22 | 97.9(14)   | C2A  | N3A  | C21A | C22A | 99.8(13)   |
| C2  | N3  | C21 | C26 | -87.3(14)  | C2A  | N3A  | C21A | C26A | -84.7(14)  |
| C4  | N3  | C2  | Ru1 | 167.2(8)   | C4A  | N3A  | C2A  | Ru1A | 169.0(8)   |
| C4  | N3  | C2  | N1  | -5.2(14)   | C4A  | N3A  | C2A  | N1A  | -4.2(12)   |
| C4  | N3  | C21 | C22 | -92.7(14)  | C4A  | N3A  | C21A | C22A | -94.6(14)  |
| C4  | N3  | C21 | C26 | 82.1(14)   | C4A  | N3A  | C21A | C26A | 80.9(12)   |
| C5  | N1  | C2  | Ru1 | -176.4(9)  | C5A  | N1A  | C2A  | Ru1A | -178.2(8)  |
| C5  | N1  | C2  | N3  | -5.8(13)   | C5A  | N1A  | C2A  | N3A  | -6.6(12)   |
| C5  | N1  | C11 | C12 | 90.8(15)   | C5A  | N1A  | C11A | C12A | 85.6(14)   |



|     |     |     |     |            |      |      |      |      |            |
|-----|-----|-----|-----|------------|------|------|------|------|------------|
| C5  | N1  | C11 | C16 | -87.2(13)  | C5A  | N1A  | C11A | C16A | -89.7(13)  |
| C11 | N1  | C2  | Ru1 | 19.3(18)   | C11A | N1A  | C2A  | Ru1A | 9.2(17)    |
| C11 | N1  | C2  | N3  | -170.0(11) | C11A | N1A  | C2A  | N3A  | -179.2(10) |
| C11 | N1  | C5  | C4  | 179.7(10)  | C11A | N1A  | C5A  | C4A  | -172.4(10) |
| C11 | C12 | C13 | C14 | 0(2)       | C11A | C12A | C13A | C14A | 1(2)       |
| C12 | C11 | C16 | C15 | 1.3(17)    | C12A | C11A | C16A | C15A | 3.0(18)    |
| C12 | C11 | C16 | C19 | -179.6(11) | C12A | C11A | C16A | C19A | -177.6(12) |
| C12 | C13 | C14 | C15 | 0(2)       | C12A | C13A | C14A | C15A | 1(2)       |
| C12 | C13 | C14 | C18 | -177.9(13) | C12A | C13A | C14A | C18A | -179.7(14) |
| C13 | C14 | C15 | C16 | 0.1(19)    | C13A | C14A | C15A | C16A | -2(2)      |
| C14 | C15 | C16 | C11 | -0.8(17)   | C14A | C15A | C16A | C11A | 0.0(18)    |
| C14 | C15 | C16 | C19 | -179.9(11) | C14A | C15A | C16A | C19A | -179.4(12) |
| C16 | C11 | C12 | C13 | -1.2(19)   | C16A | C11A | C12A | C13A | -3.7(19)   |
| C16 | C11 | C12 | C17 | 178.6(12)  | C16A | C11A | C12A | C17A | 177.1(12)  |
| C17 | C12 | C13 | C14 | -179.3(13) | C17A | C12A | C13A | C14A | -179.4(13) |
| C18 | C14 | C15 | C16 | 178.1(12)  | C18A | C14A | C15A | C16A | 179.0(14)  |
| C21 | N3  | C2  | Ru1 | -22.7(15)  | C21A | N3A  | C2A  | Ru1A | -24.5(14)  |
| C21 | N3  | C2  | N1  | 164.9(11)  | C21A | N3A  | C2A  | N1A  | 162.3(10)  |
| C21 | N3  | C4  | C5  | -157.3(11) | C21A | N3A  | C4A  | C5A  | -155.0(10) |
| C21 | C22 | C23 | C24 | -1.6(17)   | C21A | C22A | C23A | C24A | -0.1(17)   |
| C22 | C21 | C26 | C25 | -8.8(16)   | C22A | C21A | C26A | C25A | -5.8(16)   |
| C22 | C21 | C26 | C29 | 170.6(11)  | C22A | C21A | C26A | C29A | 170.2(11)  |
| C22 | C23 | C24 | C25 | -6.2(17)   | C22A | C23A | C24A | C25A | -5.5(17)   |
| C22 | C23 | C24 | C28 | 174.6(12)  | C22A | C23A | C24A | C28A | 175.3(11)  |
| C23 | C24 | C25 | C26 | 6.8(16)    | C23A | C24A | C25A | C26A | 5.6(17)    |
| C24 | C25 | C26 | C21 | 0.4(16)    | C24A | C25A | C26A | C21A | 0.0(16)    |
| C24 | C25 | C26 | C29 | -179.0(10) | C24A | C25A | C26A | C29A | -176.0(11) |
| C26 | C21 | C22 | C23 | 9.4(16)    | C26A | C21A | C22A | C23A | 5.9(16)    |
| C26 | C21 | C22 | C27 | -167.4(11) | C26A | C21A | C22A | C27A | -167.5(10) |
| C27 | C22 | C23 | C24 | 175.2(11)  | C27A | C22A | C23A | C24A | 173.1(11)  |
| C28 | C24 | C25 | C26 | -173.9(11) | C28A | C24A | C25A | C26A | -175.2(10) |
| C31 | N2  | C41 | C42 | 168.5(10)  | C31A | N2A  | C41A | C42A | 171.9(10)  |
| C31 | N2  | C44 | C43 | -171.5(10) | C31A | N2A  | C44A | C43A | -172.6(10) |
| C31 | C32 | C33 | C34 | 173.9(13)  | C31A | C32A | C33A | C34A | 171.3(14)  |
| C31 | C32 | C37 | C36 | -172.1(11) | C31A | C32A | C37A | C36A | -170.1(12) |
| C31 | C32 | C37 | C38 | 12.3(18)   | C31A | C32A | C37A | C38A | 15(2)      |
| C32 | C31 | C39 | C40 | 52.1(14)   | C32A | C31A | C39A | C40A | 56.2(15)   |
| C32 | C33 | C34 | C35 | -1(2)      | C32A | C33A | C34A | C35A | 0(2)       |
| C32 | C37 | C38 | Ru1 | 45.4(16)   | C32A | C37A | C38A | Ru1A | 43.1(16)   |
| C33 | C32 | C37 | C36 | 2.8(19)    | C33A | C32A | C37A | C36A | 3(2)       |

|     |     |     |     |            |      |      |      |      |            |
|-----|-----|-----|-----|------------|------|------|------|------|------------|
| C33 | C32 | C37 | C38 | -172.9(13) | C33A | C32A | C37A | C38A | -172.2(13) |
| C33 | C34 | C35 | C36 | 2(2)       | C33A | C34A | C35A | C36A | 1(2)       |
| C34 | C35 | C36 | C37 | 0.0(19)    | C34A | C35A | C36A | C37A | 1(2)       |
| C35 | C36 | C37 | C32 | -2.2(19)   | C35A | C36A | C37A | C32A | -2(2)      |
| C35 | C36 | C37 | C38 | 173.6(12)  | C35A | C36A | C37A | C38A | 172.7(12)  |
| C36 | C37 | C38 | Ru1 | -130.2(11) | C36A | C37A | C38A | Ru1A | -131.8(11) |
| C37 | C32 | C33 | C34 | -1(2)      | C37A | C32A | C33A | C34A | -2(2)      |
| C39 | C31 | C32 | C33 | -110.4(14) | C39A | C31A | C32A | C33A | -109.8(16) |
| C39 | C31 | C32 | C37 | 64.6(14)   | C39A | C31A | C32A | C37A | 62.7(16)   |
| C41 | N2  | C31 | C32 | 178.1(10)  | C41A | N2A  | C31A | C32A | 179.2(11)  |
| C41 | N2  | C31 | C39 | 52.1(13)   | C41A | N2A  | C31A | C39A | 52.4(14)   |
| C41 | N2  | C44 | C43 | -55.3(12)  | C41A | N2A  | C44A | C43A | -57.4(13)  |
| C42 | O1  | C43 | C44 | -61.7(13)  | C42A | O1A  | C43A | C44A | -59.2(14)  |
| C43 | O1  | C42 | C41 | 57.7(13)   | C43A | O1A  | C42A | C41A | 59.9(13)   |
| C44 | N2  | C31 | C32 | -67.0(13)  | C44A | N2A  | C31A | C32A | -67.8(14)  |
| C44 | N2  | C31 | C39 | 167.0(10)  | C44A | N2A  | C31A | C39A | 165.3(11)  |
| C44 | N2  | C41 | C42 | 53.8(12)   | C44A | N2A  | C41A | C42A | 57.3(13)   |

## 9. References

- Perecim, G.P.; Rodrigues, A.; Raminelli, C. A Convenient Formation of Aporphine Core via Benzyne Chemistry: Conformational Analysis and Synthesis of (*R*)-Aporphine. *Tetrahedron Lett.* **2015**, *56*, 6848–6851. <https://doi.org/10.1016/j.tetlet.2015.10.083>
- Kingsbury, J.S.; Harrity, J.P.A.; Bonitatebus, P.J.; Hoveyda, A.H. A Recyclable Ru-Based Metathesis Catalyst. *J. Am. Chem. Soc.* **1999**, *121*, 791–799. <https://doi.org/10.1021/ja983222u>.
- Bruker AXS Inc.: Madison, WI, USA. SAINT, V8.40B 2020 *Cif File Entries for the Purdue Quest Diffractometer (June 2020)*;
- Krause, L.; Herbst-Irmer, R.; Sheldrick, G.M.; Stalke, D. Comparison of Silver and Molybdenum Microfocus X-Ray Sources for Single-Crystal Structure Determination. *J. Appl. Cryst.* **2015**, *48*, 3–10. <https://doi.org/10.1107/S1600576714022985>.
- Sheldrick, G.M. *SHELXT* – Integrated Space-Group and Crystal-Structure Determination. *Acta Cryst.* **2015**, *A71*, 3–8. <https://doi.org/10.1107/S2053273314026370>.
- Sheldrick, G.M. Crystal Structure Refinement with *SHELXL*. *Acta Cryst.* **2015**, *C71*, 3–8. <https://doi.org/10.1107/S2053229614024218>.
- Spek, A.L. *PLATON SQUEEZE*: A Tool for the Calculation of the Disordered Solvent Contribution to the Calculated Structure Factors. *Acta Cryst.* **2015**, *C71*, 9–18. <https://doi.org/10.1107/S2053229614024929>.
- Dolomanov, O.V.; Bourhis, L.J.; Gildea, R.J.; Howard, J.A.K.; Puschmann, H. *OLEX2*: A Complete Structure Solution, Refinement and Analysis Program. *J. Appl. Cryst.* **2009**, *42*, 339–341. <https://doi.org/10.1107/S0021889808042726>.

## 10. Copies of NMR, FTIR and mass spectra for compounds 1–5
